# Supplementary material for: Global Evaluation of Congenital Heart Disease-Associated Non-Coding Variants
Source: bioRxiv preprint, doi:10.64898/2025.12.02.691900, version 2 (2025-12-10)
Supplement: Supplemental Data 1 [file 691900_file02.xlsx]

## Sheet: Readme
Sheet_name	Description
SNP Bind-n-Seq Library	all oligos used for the SNP Bind-n-Seq.
NKX2-5 Ki values	Ki values for all oligos generated from experimental NKX2-5 data
GATA4 Ki values	Ki values for all oligos generated from experimental GATA4 data
TBX5 Ki values	Ki values for all oligos generated from experimental TBX5 data
Significant_Ki_change	all variants with significant change in Ki values between reference and alternate alleles.
HOMER_Disrupted_motif	TF motifs found uniquely in the reference allele. These alleles used for the HOMER motif enrichment analysis are from the "significant_Ki_change" sheet.
HOMER_Created_motif	TF motifs found uniquely in the alternate allele. These alleles used for the HOMER motif enrichment analysis are from the "significant_Ki_change" sheet.

## Sheet: SNP Bind-n-Seq Library
Synthesied oligo	rsID	allele
TCCCTACACGACGCTCTTCCGATCTNNCGGAGTCTCTGGGACTCAGAGATGGGGGTTGGGGGTTTCANNGATCGGAAGAGCACACGTCTGAACTCCAGTCAC	rs4661574	A
TCCCTACACGACGCTCTTCCGATCTNNGAGGCCAAGGTGGGCAGATAACTTGAGGCTGGGAGTTCGANNGATCGGAAGAGCACACGTCTGAACTCCAGTCAC	rs2137643	A
TCCCTACACGACGCTCTTCCGATCTNNGCCGCTCACCACTGGCTTAAGAAACTCCCGGGAGGCAGTTNNGATCGGAAGAGCACACGTCTGAACTCCAGTCAC	rs1000313	A
TCCCTACACGACGCTCTTCCGATCTNNGGGAGAAGGGTGGCTGGTCATGGGAAAAAGCACAAGTCTANNGATCGGAAGAGCACACGTCTGAACTCCAGTCAC	rs2175775	A
TCCCTACACGACGCTCTTCCGATCTNNTGCCACCTCGCTGCCCACCAAGGGTCCTGCCATCAGCCCCNNGATCGGAAGAGCACACGTCTGAACTCCAGTCAC	rs2137641	A
TCCCTACACGACGCTCTTCCGATCTNNGTTGGCAGAAGATGAGACCACAGAGGAAGGCCTGCTCCCTNNGATCGGAAGAGCACACGTCTGAACTCCAGTCAC	rs61772223	A
TCCCTACACGACGCTCTTCCGATCTNNGCATAGGAGAATTTACAAGACCTTTACCTCTAAGCCTCTGNNGATCGGAAGAGCACACGTCTGAACTCCAGTCAC	rs4501834	A
TCCCTACACGACGCTCTTCCGATCTNNACTGGGAGGCGGGGAATTCAGGGTTGAAGCAGAGCTCCCANNGATCGGAAGAGCACACGTCTGAACTCCAGTCAC	rs6665995	A
TCCCTACACGACGCTCTTCCGATCTNNTTTCCCATCACTGATGACAATGGACATCTCCATATACCAGNNGATCGGAAGAGCACACGTCTGAACTCCAGTCAC	rs6668887	A
TCCCTACACGACGCTCTTCCGATCTNNACGTCTACAGACAAAAAACAAAAGCTGTAAGCTAACACCANNGATCGGAAGAGCACACGTCTGAACTCCAGTCAC	rs6429709	A
TCCCTACACGACGCTCTTCCGATCTNNAGCTGATAACATTAAAAATAAATAAAAGGGTGGGTTAAACNNGATCGGAAGAGCACACGTCTGAACTCCAGTCAC	rs6680739	A
TCCCTACACGACGCTCTTCCGATCTNNAAAAAATAGAATTAGAAAGACCAACTTATATCTAACTGGANNGATCGGAAGAGCACACGTCTGAACTCCAGTCAC	rs10803349	A
TCCCTACACGACGCTCTTCCGATCTNNTGAAATCAGGTAATCCACCAGCCTCGGCCTCCCAAAGTGCNNGATCGGAAGAGCACACGTCTGAACTCCAGTCAC	rs10803350	A
TCCCTACACGACGCTCTTCCGATCTNNGAAATCAGGTAATCCACCTACCTCGGCCTCCCAAAGTGCTNNGATCGGAAGAGCACACGTCTGAACTCCAGTCAC	rs10803351	A
TCCCTACACGACGCTCTTCCGATCTNNCTAAAACCGTGTTCCCAGCAAAACCCTTTGAAGCACAAGGNNGATCGGAAGAGCACACGTCTGAACTCCAGTCAC	rs10927672	A
TCCCTACACGACGCTCTTCCGATCTNNCCTGTGAGATTAAGCGTTCATATCATCCCCGTTTTACAGANNGATCGGAAGAGCACACGTCTGAACTCCAGTCAC	rs4661575	A
TCCCTACACGACGCTCTTCCGATCTNNGCCAGGACGGTCTCGATCTACTGACCTCGTGATCTACCTGNNGATCGGAAGAGCACACGTCTGAACTCCAGTCAC	rs12072230	A
TCCCTACACGACGCTCTTCCGATCTNNGGAGCGTCATTCCTTCAAAAAAACTCTCATCAATAACCATNNGATCGGAAGAGCACACGTCTGAACTCCAGTCAC	rs16851281	A
TCCCTACACGACGCTCTTCCGATCTNNACAGACACATGGGGAAGACAAGAGGCCCCAAAGGCCCTAGNNGATCGGAAGAGCACACGTCTGAACTCCAGTCAC	rs4661576	A
TCCCTACACGACGCTCTTCCGATCTNNCCATGGTGTCTGCTCCTGGATCTTACCATACATAACAGGGNNGATCGGAAGAGCACACGTCTGAACTCCAGTCAC	rs4661318	A
TCCCTACACGACGCTCTTCCGATCTNNCAGGGATCGTGGAGCCCCAACCTTAGACACCCCCAGGGCTNNGATCGGAAGAGCACACGTCTGAACTCCAGTCAC	rs72640706	A
TCCCTACACGACGCTCTTCCGATCTNNACCTGTTAAAGTAGAATTGACAATGTGTAGAACTGAAAATNNGATCGGAAGAGCACACGTCTGAACTCCAGTCAC	rs702225	A
TCCCTACACGACGCTCTTCCGATCTNNCTCTGGCTAAACAAACTCTATATGTGTGTTTTGGGGGTGGNNGATCGGAAGAGCACACGTCTGAACTCCAGTCAC	rs4660585	A
TCCCTACACGACGCTCTTCCGATCTNNAGGGACTAAGAAACTCGTCAAATCCACAGAATTAACATATNNGATCGGAAGAGCACACGTCTGAACTCCAGTCAC	rs1325504	A
TCCCTACACGACGCTCTTCCGATCTNNAAAATAGGGAAGGACATGGATTGAGAATAAGCAGGGAGGGNNGATCGGAAGAGCACACGTCTGAACTCCAGTCAC	rs4660586	A
TCCCTACACGACGCTCTTCCGATCTNNTCTAGTTACAAAACAGAAAAAATAATTGAAGCAATCTGATNNGATCGGAAGAGCACACGTCTGAACTCCAGTCAC	rs10890170	A
TCCCTACACGACGCTCTTCCGATCTNNATGCCTGAAAGCCCCACTCACTTGTTAGGGAGAGACATTCNNGATCGGAAGAGCACACGTCTGAACTCCAGTCAC	rs4660587	A
TCCCTACACGACGCTCTTCCGATCTNNAAAGAAATTCGAGATTGCAAACAACATAGAGCAGAGGAGCNNGATCGGAAGAGCACACGTCTGAACTCCAGTCAC	rs117694341	A
TCCCTACACGACGCTCTTCCGATCTNNGCAGAAACTGGACTGGAAGATTCTGAAGGCAGCTTTCAACNNGATCGGAAGAGCACACGTCTGAACTCCAGTCAC	rs1408948	A
TCCCTACACGACGCTCTTCCGATCTNNCCAAGGAACACAGTTTTTGATAAAATTAAGTTATAGCTGCNNGATCGGAAGAGCACACGTCTGAACTCCAGTCAC	rs639559	A
TCCCTACACGACGCTCTTCCGATCTNNGGTACCTGCCACCACGCCCAGCTATTTTTTTGTATTTTTANNGATCGGAAGAGCACACGTCTGAACTCCAGTCAC	rs685229	A
TCCCTACACGACGCTCTTCCGATCTNNCCTCCAAGAACTATGGGATAATATAAAAGGACCAAACCTANNGATCGGAAGAGCACACGTCTGAACTCCAGTCAC	rs642579	A
TCCCTACACGACGCTCTTCCGATCTNNAAAGAGGCTTAGTCACTTGACCACAAGCTCTCAGCTAAGTNNGATCGGAAGAGCACACGTCTGAACTCCAGTCAC	rs604145	A
TCCCTACACGACGCTCTTCCGATCTNNCCACTACTAGAAAGATCTGATTTTGCTAATGGACAGATAANNGATCGGAAGAGCACACGTCTGAACTCCAGTCAC	rs689277	A
TCCCTACACGACGCTCTTCCGATCTNNTGGCTATGGAGTAGATTTGACTCCTAATACTGAAATTTCTNNGATCGGAAGAGCACACGTCTGAACTCCAGTCAC	rs661428	A
TCCCTACACGACGCTCTTCCGATCTNNCTGACCTCGTGATCCACCCACCTTGGCCTCCCAAAGTGCTNNGATCGGAAGAGCACACGTCTGAACTCCAGTCAC	rs627502	A
TCCCTACACGACGCTCTTCCGATCTNNAGCTGATCTTTGACAAAAAAGCCAAGAACCCACATTGGGGNNGATCGGAAGAGCACACGTCTGAACTCCAGTCAC	rs642112	A
TCCCTACACGACGCTCTTCCGATCTNNGAAACTAAAAGAAAAAAAAAGATCAATGACTGGGTTTAACNNGATCGGAAGAGCACACGTCTGAACTCCAGTCAC	rs638734	A
TCCCTACACGACGCTCTTCCGATCTNNACATGAACTCTTCAGGAATATAAGTTACTTATATAAAGATNNGATCGGAAGAGCACACGTCTGAACTCCAGTCAC	rs238675	A
TCCCTACACGACGCTCTTCCGATCTNNGATCTATATAATTCACTTAATAATGTACAGGGCTTTCTGTNNGATCGGAAGAGCACACGTCTGAACTCCAGTCAC	rs348139	A
TCCCTACACGACGCTCTTCCGATCTNNTTGCATCTTAGTATTATTAAAAAAGTATTTTTGACCTCATNNGATCGGAAGAGCACACGTCTGAACTCCAGTCAC	rs6600394	A
TCCCTACACGACGCTCTTCCGATCTNNCACTGGGGCTTCTCAGCTTAGTCGGTGCCAATGCTTACTANNGATCGGAAGAGCACACGTCTGAACTCCAGTCAC	rs3856258	A
TCCCTACACGACGCTCTTCCGATCTNNTGCTGTATCCCTTTTAAAAACTCCCACGAAGACTCACCTANNGATCGGAAGAGCACACGTCTGAACTCCAGTCAC	rs7546128	A
TCCCTACACGACGCTCTTCCGATCTNNTTCTCAAACTATTATATTGACTTTTTACATATTTCTTAAANNGATCGGAAGAGCACACGTCTGAACTCCAGTCAC	rs3856259	A
TCCCTACACGACGCTCTTCCGATCTNNTCAGCCCAGACCACTGTTTAAAAGCTCACTCTTGTCCTCCNNGATCGGAAGAGCACACGTCTGAACTCCAGTCAC	rs3845574	A
TCCCTACACGACGCTCTTCCGATCTNNTTCATTTAGTTCTAGGACAAGGTTTCCCACTGAAATAACANNGATCGGAAGAGCACACGTCTGAACTCCAGTCAC	rs4660210	A
TCCCTACACGACGCTCTTCCGATCTNNTCAAGACCAGCCTCACCAAAGTGGTGAAACCTCATTTCTANNGATCGGAAGAGCACACGTCTGAACTCCAGTCAC	rs4083557	A
TCCCTACACGACGCTCTTCCGATCTNNGCAGTCTTCCACTTACAAGAAATACTTTAGGTGCTGCTCANNGATCGGAAGAGCACACGTCTGAACTCCAGTCAC	rs7541929	A
TCCCTACACGACGCTCTTCCGATCTNNTTGTGTTGTGACATCTGCTAAGGTGAACTTTCTAGGCACCNNGATCGGAAGAGCACACGTCTGAACTCCAGTCAC	rs10736422	A
TCCCTACACGACGCTCTTCCGATCTNNGGGGCCTTTGGCTAGTTACATGGGGCTGAAACAGCATGAANNGATCGGAAGAGCACACGTCTGAACTCCAGTCAC	rs6695748	A
TCCCTACACGACGCTCTTCCGATCTNNTTTATCATGAAACTGGTAAAATACAGACAAAATTTAATAANNGATCGGAAGAGCACACGTCTGAACTCCAGTCAC	rs4660595	A
TCCCTACACGACGCTCTTCCGATCTNNATGCCTCTGACATAAAAATAACTTTTTAGCAAAAGGCAATNNGATCGGAAGAGCACACGTCTGAACTCCAGTCAC	rs4660211	A
TCCCTACACGACGCTCTTCCGATCTNNATATTGACCTGGTATCCAGAACCCCTGCTTAAATTTACTTNNGATCGGAAGAGCACACGTCTGAACTCCAGTCAC	rs768613	A
TCCCTACACGACGCTCTTCCGATCTNNAAAAGACTCAAGGGTAACTACTAGGTTTTTGGCCTGGGAANNGATCGGAAGAGCACACGTCTGAACTCCAGTCAC	rs784103	A
TCCCTACACGACGCTCTTCCGATCTNNATTCTTCTGTCAGTTTTCAATCTTCATTTCAAATGACAAANNGATCGGAAGAGCACACGTCTGAACTCCAGTCAC	rs6689536	A
TCCCTACACGACGCTCTTCCGATCTNNTCTGGTTAAGTCACCACTTATATATATCTCTTCTTTTTTCNNGATCGGAAGAGCACACGTCTGAACTCCAGTCAC	rs348128	A
TCCCTACACGACGCTCTTCCGATCTNNTTTTTATGCATTGTGTAAAATGATAGTCGAATTACATATTNNGATCGGAAGAGCACACGTCTGAACTCCAGTCAC	rs6600396	A
TCCCTACACGACGCTCTTCCGATCTNNCCATTTATTGGAAAGTTTAACCTTTATCTGTAGTGTCTCCNNGATCGGAAGAGCACACGTCTGAACTCCAGTCAC	rs7535305	A
TCCCTACACGACGCTCTTCCGATCTNNTTCTCAGAAATTGAGGTGAAATAAAACCATCCTCAAATCTNNGATCGGAAGAGCACACGTCTGAACTCCAGTCAC	rs2042064	A
TCCCTACACGACGCTCTTCCGATCTNNGTGTATTAGTTCATTTTCAAGCTGCCGATAAAGACATACCNNGATCGGAAGAGCACACGTCTGAACTCCAGTCAC	rs7529102	A
TCCCTACACGACGCTCTTCCGATCTNNAAAGGCACTTCTTACATGGAGGTGGCAAGAGAAAAATGAGNNGATCGGAAGAGCACACGTCTGAACTCCAGTCAC	rs7515102	A
TCCCTACACGACGCTCTTCCGATCTNNGTCACCAGATATTCTGATGATTCAAGAGAAGGCAGAAATCNNGATCGGAAGAGCACACGTCTGAACTCCAGTCAC	rs11210563	A
TCCCTACACGACGCTCTTCCGATCTNNTCTTTTTAGCTCATCAGCTATCATTAATGTTAGCATATTTNNGATCGGAAGAGCACACGTCTGAACTCCAGTCAC	rs1327711	A
TCCCTACACGACGCTCTTCCGATCTNNCTGCCAAGCCTCTCCTATTAGGCAGGCAATCTGTAATTATNNGATCGGAAGAGCACACGTCTGAACTCCAGTCAC	rs4660212	A
TCCCTACACGACGCTCTTCCGATCTNNCTACTTCCTGTTCCAGACTACTCTGCTGAACAACCCAGTTNNGATCGGAAGAGCACACGTCTGAACTCCAGTCAC	rs2886564	A
TCCCTACACGACGCTCTTCCGATCTNNTGGCAGAGTTAAGACCAGAACAAGAACTCCTAACTCAATGNNGATCGGAAGAGCACACGTCTGAACTCCAGTCAC	rs12042133	A
TCCCTACACGACGCTCTTCCGATCTNNCAAGTATCCAAACTTATTTAAACCTCAGTGTTTTTCTTAANNGATCGGAAGAGCACACGTCTGAACTCCAGTCAC	rs6696291	A
TCCCTACACGACGCTCTTCCGATCTNNATTTAAACCTCAGTGTTTTACTTAACTGAGGAACACTCAGNNGATCGGAAGAGCACACGTCTGAACTCCAGTCAC	rs6698877	A
TCCCTACACGACGCTCTTCCGATCTNNCTCCCCAACCCCTGGCTCTACCACCTCTCCCTCAGCACCGNNGATCGGAAGAGCACACGTCTGAACTCCAGTCAC	rs1642645	A
TCCCTACACGACGCTCTTCCGATCTNNGGACACCCATTACTTCAGCAAGCGTTAGCTCTTTCTTAGGNNGATCGGAAGAGCACACGTCTGAACTCCAGTCAC	rs10890176	A
TCCCTACACGACGCTCTTCCGATCTNNCTGGCTACAGAAGTTAGTTAAAAGGCAGTCATGAAACCCANNGATCGGAAGAGCACACGTCTGAACTCCAGTCAC	rs7550497	A
TCCCTACACGACGCTCTTCCGATCTNNGTTAGTTTAAAGGCAGTCAAGAAACCCAATCAGAGCAAAGNNGATCGGAAGAGCACACGTCTGAACTCCAGTCAC	rs7550500	A
TCCCTACACGACGCTCTTCCGATCTNNCCAACTGCACCATGCCCCAATGGGCTCAGGCGAGTTCCATNNGATCGGAAGAGCACACGTCTGAACTCCAGTCAC	rs10890177	A
TCCCTACACGACGCTCTTCCGATCTNNGAAACTTGCCCAAAGTCACACAGTCAGTAGGTGACAGAACNNGATCGGAAGAGCACACGTCTGAACTCCAGTCAC	rs12041198	A
TCCCTACACGACGCTCTTCCGATCTNNCTGCATCTAATCTTAATCAACCTGGAAAGATGAGTGTCCANNGATCGGAAGAGCACACGTCTGAACTCCAGTCAC	rs4660600	A
TCCCTACACGACGCTCTTCCGATCTNNCTCCCCCCAACCACCATTGACCAAACCCCCAACCCAAGCANNGATCGGAAGAGCACACGTCTGAACTCCAGTCAC	rs1558951	A
TCCCTACACGACGCTCTTCCGATCTNNCAGAACAGTAGGACCTTGCAGGCTGTTCTCGGTTCTCTGCNNGATCGGAAGAGCACACGTCTGAACTCCAGTCAC	rs10437061	A
TCCCTACACGACGCTCTTCCGATCTNNCATTTGTTTCAGCTGGGTTACCATCAGGGAAAGAATCCTGNNGATCGGAAGAGCACACGTCTGAACTCCAGTCAC	rs2042065	A
TCCCTACACGACGCTCTTCCGATCTNNATTTGATTAAAATTACTAGACAAGGGCCGGGCGCAGTGGCNNGATCGGAAGAGCACACGTCTGAACTCCAGTCAC	rs11210570	A
TCCCTACACGACGCTCTTCCGATCTNNAACCTGCACATTGTGCACAAGTACCCTAGAACCTGAAGGANNGATCGGAAGAGCACACGTCTGAACTCCAGTCAC	rs6699171	A
TCCCTACACGACGCTCTTCCGATCTNNAGTACCCTAGAACCTGAAGAATAATAATAAAAATAAATAANNGATCGGAAGAGCACACGTCTGAACTCCAGTCAC	rs11210573	A
TCCCTACACGACGCTCTTCCGATCTNNGCAGTGTACAAGTGTTCCAATTTCTCCACATCCTCACCAANNGATCGGAAGAGCACACGTCTGAACTCCAGTCAC	rs7537504	A
TCCCTACACGACGCTCTTCCGATCTNNGTAGGTTGTCTTTTCACTTAATTGATAACATCCTTCAATANNGATCGGAAGAGCACACGTCTGAACTCCAGTCAC	rs12034439	A
TCCCTACACGACGCTCTTCCGATCTNNTGTTGCCTCTCAGTAGAAGACAATAAAGTGGGTTATTTTGNNGATCGGAAGAGCACACGTCTGAACTCCAGTCAC	rs4951142	A
TCCCTACACGACGCTCTTCCGATCTNNGGGTGGACAGGTGGGGTTGAAGCCAGACTGCGGGGGAACANNGATCGGAAGAGCACACGTCTGAACTCCAGTCAC	rs4950970	A
TCCCTACACGACGCTCTTCCGATCTNNACCCAGCCGAAATCTTCCTACGCTGGGGGACAGGCCCATGNNGATCGGAAGAGCACACGTCTGAACTCCAGTCAC	rs4950971	A
TCCCTACACGACGCTCTTCCGATCTNNATTCCAGGGTTGGTGGGGAAAAGTGGAAGGAGGAGGGGTCNNGATCGGAAGAGCACACGTCTGAACTCCAGTCAC	rs67722488	A
TCCCTACACGACGCTCTTCCGATCTNNTTCTCTCTCTTTGAACTTAACTACGCTAGGAACCTCAATANNGATCGGAAGAGCACACGTCTGAACTCCAGTCAC	rs4951143	A
TCCCTACACGACGCTCTTCCGATCTNNAGGCACAGAGGCATCCTATACACAGCGTCTGTGAAACGGCNNGATCGGAAGAGCACACGTCTGAACTCCAGTCAC	rs6661460	A
TCCCTACACGACGCTCTTCCGATCTNNAGTAAATGCAGTTTTCGCCATTAAAAAAACATAATGGCAANNGATCGGAAGAGCACACGTCTGAACTCCAGTCAC	rs11240298	A
TCCCTACACGACGCTCTTCCGATCTNNCAGTCTTGTTTCATCCAGCAGATTCTTCTCTTTGATCTGCNNGATCGGAAGAGCACACGTCTGAACTCCAGTCAC	rs11240299	A
TCCCTACACGACGCTCTTCCGATCTNNGTCGGCAGATCTGGGCACCATGGAGCTAAATCCTTCCCAGNNGATCGGAAGAGCACACGTCTGAACTCCAGTCAC	rs10900426	A
TCCCTACACGACGCTCTTCCGATCTNNTCCCCTTAGGGGAATAGCAATGAGCCAAGCTAATCTGAGGNNGATCGGAAGAGCACACGTCTGAACTCCAGTCAC	rs10900427	A
TCCCTACACGACGCTCTTCCGATCTNNTATCTGCAGCATGCCAGACACTAGGTGCTTTGAATGCAACNNGATCGGAAGAGCACACGTCTGAACTCCAGTCAC	rs11240300	A
TCCCTACACGACGCTCTTCCGATCTNNTGGGACAAAAAAATAATAGAGAATAACTAACATTTGTTATNNGATCGGAAGAGCACACGTCTGAACTCCAGTCAC	rs10900428	A
TCCCTACACGACGCTCTTCCGATCTNNCTGCATGGAGGCCTACCTTATGAGTGTGAACACATTTTCTNNGATCGGAAGAGCACACGTCTGAACTCCAGTCAC	rs12410154	A
TCCCTACACGACGCTCTTCCGATCTNNCTTAGACAGCTCTACCTGCATGAGCTAAGAGGGAGTTGAANNGATCGGAAGAGCACACGTCTGAACTCCAGTCAC	rs12047221	A
TCCCTACACGACGCTCTTCCGATCTNNCCGCCACCACGCCTAGCTAATTTTTTGTATTTTTAGTAGANNGATCGGAAGAGCACACGTCTGAACTCCAGTCAC	rs12044054	A
TCCCTACACGACGCTCTTCCGATCTNNCTCCTGACGTGCTGCACCCACCTCAGTCTCCCAAAGTGCTNNGATCGGAAGAGCACACGTCTGAACTCCAGTCAC	rs12047348	A
TCCCTACACGACGCTCTTCCGATCTNNCCTGAGTTCCCAGGTGTTTAAAAAGCAAAATTTTATGCAGNNGATCGGAAGAGCACACGTCTGAACTCCAGTCAC	rs11240304	A
TCCCTACACGACGCTCTTCCGATCTNNGCAGCATGGGATTGGCAGGACAGCTTCCATAGTCTGGCCANNGATCGGAAGAGCACACGTCTGAACTCCAGTCAC	rs4370813	A
TCCCTACACGACGCTCTTCCGATCTNNAGCCTGTTATCCTTTTTAGAACAACTGTGTCATGATTTTTNNGATCGGAAGAGCACACGTCTGAACTCCAGTCAC	rs11240305	A
TCCCTACACGACGCTCTTCCGATCTNNTTTTTTTGAGACAGGGTCTAACTCTGTTGCTGTCACCCAGNNGATCGGAAGAGCACACGTCTGAACTCCAGTCAC	rs79237018	A
TCCCTACACGACGCTCTTCCGATCTNNCTCTGTCGCCCAGGCTAAAATATAATAGCATGATCTCTGCNNGATCGGAAGAGCACACGTCTGAACTCCAGTCAC	rs7541623	A
TCCCTACACGACGCTCTTCCGATCTNNCACAGAGATGAAGAGGCACATTGCCCAGGCAGGCAACAAGNNGATCGGAAGAGCACACGTCTGAACTCCAGTCAC	rs10900429	A
TCCCTACACGACGCTCTTCCGATCTNNAATCTTCTCCAGCCCTAGCATCCATGGAGCCCTGTACCTANNGATCGGAAGAGCACACGTCTGAACTCCAGTCAC	rs12405099	A
TCCCTACACGACGCTCTTCCGATCTNNATAGTTAACCCCTTCCTTTACTGAACTCTTAACGACTTTCNNGATCGGAAGAGCACACGTCTGAACTCCAGTCAC	rs12405378	A
TCCCTACACGACGCTCTTCCGATCTNNTCCTTTCCTGAACTCTTAAAGACTTTCAGTTCCTTAGCAANNGATCGGAAGAGCACACGTCTGAACTCCAGTCAC	rs12405381	A
TCCCTACACGACGCTCTTCCGATCTNNCGATAGTTCTTATGTATTGATTAGAAGCTGATAATATTTTNNGATCGGAAGAGCACACGTCTGAACTCCAGTCAC	rs12401710	A
TCCCTACACGACGCTCTTCCGATCTNNAAACGTCTGCAGAATACCAAGAAGTGATCTAGCAGCAGGGNNGATCGGAAGAGCACACGTCTGAACTCCAGTCAC	rs7550921	A
TCCCTACACGACGCTCTTCCGATCTNNTGGATGTAGGTGCTTTCAGATTTGGGGCAGGACTTCAGTTNNGATCGGAAGAGCACACGTCTGAACTCCAGTCAC	rs737017	A
TCCCTACACGACGCTCTTCCGATCTNNCAGCTTATCAACTCTTTGTACCTGGATGTATCACCTCATANNGATCGGAAGAGCACACGTCTGAACTCCAGTCAC	rs60896484	A
TCCCTACACGACGCTCTTCCGATCTNNCTGTATCTTTGGCAGAGATAAAAAAAATATTTGTCAAAAGNNGATCGGAAGAGCACACGTCTGAACTCCAGTCAC	rs911988	A
TCCCTACACGACGCTCTTCCGATCTNNCTTAATCTTTATTCTTTGAATCTTTTTACTGCTGGAATGTNNGATCGGAAGAGCACACGTCTGAACTCCAGTCAC	rs1923665	A
TCCCTACACGACGCTCTTCCGATCTNNAATCAGAAAAGCTGAATGCAGAGAACTGAGGTGCATCGCCNNGATCGGAAGAGCACACGTCTGAACTCCAGTCAC	rs10900430	A
TCCCTACACGACGCTCTTCCGATCTNNGTAGAAGGAAGAAGGTTCAAAGGAAAGGCTGGTGATGTATNNGATCGGAAGAGCACACGTCTGAACTCCAGTCAC	rs2181293	A
TCCCTACACGACGCTCTTCCGATCTNNTGACTTTTAAGCTGAGATGAGACAAATGAGTAGAGACTAGNNGATCGGAAGAGCACACGTCTGAACTCCAGTCAC	rs2759281	A
TCCCTACACGACGCTCTTCCGATCTNNTGTTGGATTCATTAGGAGGAGCTTGCTTTTGTCCCACAAANNGATCGGAAGAGCACACGTCTGAACTCCAGTCAC	rs4951144	A
TCCCTACACGACGCTCTTCCGATCTNNACCAGTGTTATTGTTGAGGAGGAGATGGCTACCCTTCCCTNNGATCGGAAGAGCACACGTCTGAACTCCAGTCAC	rs4951145	A
TCCCTACACGACGCTCTTCCGATCTNNCCAGGTGGCATTCTCTCCCAGAATCTCCCCAGACATGCCTNNGATCGGAAGAGCACACGTCTGAACTCCAGTCAC	rs10794764	A
TCCCTACACGACGCTCTTCCGATCTNNCCCCCGAATTGTCTATGCTATGTGCCAGATTTCTTTCTTANNGATCGGAAGAGCACACGTCTGAACTCCAGTCAC	rs11816709	A
TCCCTACACGACGCTCTTCCGATCTNNACCACCCAGCTCATATGCAAAGTGGCTGATAGATGGTTTTNNGATCGGAAGAGCACACGTCTGAACTCCAGTCAC	rs11815041	A
TCCCTACACGACGCTCTTCCGATCTNNAGCAGGGTGTGTATTGGTCATTCTTTGTGTTCATGAAGTCNNGATCGGAAGAGCACACGTCTGAACTCCAGTCAC	rs9663299	A
TCCCTACACGACGCTCTTCCGATCTNNATATGTTGGTCTGGCATTGAAACTTATCTCTTCACGGGTCNNGATCGGAAGAGCACACGTCTGAACTCCAGTCAC	rs11250642	A
TCCCTACACGACGCTCTTCCGATCTNNTTTTATTTAGAGCAGTTTGAGGTTCTCAGCAAAGAAGGTANNGATCGGAAGAGCACACGTCTGAACTCCAGTCAC	rs10903494	A
TCCCTACACGACGCTCTTCCGATCTNNACCTTCTATGGGCTTGGACAGGTGGAGAGTGTCTTGGATCNNGATCGGAAGAGCACACGTCTGAACTCCAGTCAC	rs2813384	A
TCCCTACACGACGCTCTTCCGATCTNNCCATGCTCCTTCTGTTCCTACCTCCTTCCCCACAAGCCCTNNGATCGGAAGAGCACACGTCTGAACTCCAGTCAC	rs7074330	A
TCCCTACACGACGCTCTTCCGATCTNNGAATATACACCTTATAACCATTTCAGACTGCCTCATTCACNNGATCGGAAGAGCACACGTCTGAACTCCAGTCAC	rs7095293	A
TCCCTACACGACGCTCTTCCGATCTNNTTCAGACTGCCTCATTCACATAGCAACGTGCACTTAAGATNNGATCGGAAGAGCACACGTCTGAACTCCAGTCAC	rs2676728	A
TCCCTACACGACGCTCTTCCGATCTNNTCTCTGTGCTGAATCATGCACCATCGTGCGGATGAAGCCCNNGATCGGAAGAGCACACGTCTGAACTCCAGTCAC	rs2676727	A
TCCCTACACGACGCTCTTCCGATCTNNCCTTTGGGTAAATACTCAGAGTGGAGCTGCTGGAATACGTNNGATCGGAAGAGCACACGTCTGAACTCCAGTCAC	rs2813385	A
TCCCTACACGACGCTCTTCCGATCTNNTCGCCAATACACTGACTAGAAGCAGGGATAGAACCTGGTCNNGATCGGAAGAGCACACGTCTGAACTCCAGTCAC	rs7095757	A
TCCCTACACGACGCTCTTCCGATCTNNCAAACGATGTTCAAGGTGCAGGGAAGAAGCCTGGAACTGTNNGATCGGAAGAGCACACGTCTGAACTCCAGTCAC	rs7077393	A
TCCCTACACGACGCTCTTCCGATCTNNTAAACCCATCAGACGTTCCACTCGTGGGAGCTTTCCCTGTNNGATCGGAAGAGCACACGTCTGAACTCCAGTCAC	rs10751804	A
TCCCTACACGACGCTCTTCCGATCTNNCTCGTGGGAGCTTTCCCTGAGACAGCTACCTGGAAGCATANNGATCGGAAGAGCACACGTCTGAACTCCAGTCAC	rs10751805	A
TCCCTACACGACGCTCTTCCGATCTNNCTTTCCCTGTGACAGCTACATGGAAGCATACACCCAGTTCNNGATCGGAAGAGCACACGTCTGAACTCCAGTCAC	rs2676725	A
TCCCTACACGACGCTCTTCCGATCTNNTGACAGCTACCTGGAAGCAAACACCCAGTTCCACTGGAGCNNGATCGGAAGAGCACACGTCTGAACTCCAGTCAC	rs2813387	A
TCCCTACACGACGCTCTTCCGATCTNNCCAGGTAATGAGCCTGTACATAAACCTGTAGAATGGAACANNGATCGGAAGAGCACACGTCTGAACTCCAGTCAC	rs10903496	A
TCCCTACACGACGCTCTTCCGATCTNNTGGAACAACAGTAACTACCACAGGGGTAGGTCTAGAGTATNNGATCGGAAGAGCACACGTCTGAACTCCAGTCAC	rs2813388	A
TCCCTACACGACGCTCTTCCGATCTNNAGTTTAAAACTTATGTCCAAGCAAAAACCTGCACTTGGATNNGATCGGAAGAGCACACGTCTGAACTCCAGTCAC	rs2676706	A
TCCCTACACGACGCTCTTCCGATCTNNACAGAGAATAGATTCCTGGATTCTCTGCGATTATTTAATGNNGATCGGAAGAGCACACGTCTGAACTCCAGTCAC	rs2813392	A
TCCCTACACGACGCTCTTCCGATCTNNATACTGGAGATGGAATAAGAGTTCCCTGTATCAGTGAGTTNNGATCGGAAGAGCACACGTCTGAACTCCAGTCAC	rs2892584	A
TCCCTACACGACGCTCTTCCGATCTNNTCATTTTTAAATATGGGGTAATATGCAATTTGACTCAATTNNGATCGGAAGAGCACACGTCTGAACTCCAGTCAC	rs6602315	A
TCCCTACACGACGCTCTTCCGATCTNNCCCGGCTGGTCCTGGGCTTAAGCACAATTTCAGCAGAGGGNNGATCGGAAGAGCACACGTCTGAACTCCAGTCAC	rs6602316	A
TCCCTACACGACGCTCTTCCGATCTNNTTTCAGGTGCTTGACATTCAATGTCTAGCATCAGCATTGGNNGATCGGAAGAGCACACGTCTGAACTCCAGTCAC	rs6602317	A
TCCCTACACGACGCTCTTCCGATCTNNAGAATAGGCAACACACAGGAGCACACAGGCAGACTAACATNNGATCGGAAGAGCACACGTCTGAACTCCAGTCAC	rs4749774	A
TCCCTACACGACGCTCTTCCGATCTNNTCATTTTTGACTTTTGAATACCATTATTAGCAATTTGTTGNNGATCGGAAGAGCACACGTCTGAACTCCAGTCAC	rs10795651	A
TCCCTACACGACGCTCTTCCGATCTNNTAAGAATTGGCAGAAGAATACATTTGGCACTTTTGATTTGNNGATCGGAAGAGCACACGTCTGAACTCCAGTCAC	rs10752140	A
TCCCTACACGACGCTCTTCCGATCTNNCCTGTGATGTCAACATCATAGTGGTTAACAATTTTGGAATNNGATCGGAAGAGCACACGTCTGAACTCCAGTCAC	rs2388745	A
TCCCTACACGACGCTCTTCCGATCTNNGGTTGAGCTTCTGGAAAGAACCTGAACATTAAATGCAGTANNGATCGGAAGAGCACACGTCTGAACTCCAGTCAC	rs10795652	A
TCCCTACACGACGCTCTTCCGATCTNNAGAGATATCTAAGTAAAGCAGTGCTTTGCCTGCTAAGACANNGATCGGAAGAGCACACGTCTGAACTCCAGTCAC	rs2388741	A
TCCCTACACGACGCTCTTCCGATCTNNCAGATAAGCGTTTTGGATGATGCAAATGTTAACATACACANNGATCGGAAGAGCACACGTCTGAACTCCAGTCAC	rs17388957	A
TCCCTACACGACGCTCTTCCGATCTNNTACAAGCTGCTACGTAATCAGCTAAGCATTTTATATGTTGNNGATCGGAAGAGCACACGTCTGAACTCCAGTCAC	rs72775230	A
TCCCTACACGACGCTCTTCCGATCTNNAGTTAAATTGGTGTTTGTTATAAAGCTTTATTAGAATGTCNNGATCGGAAGAGCACACGTCTGAACTCCAGTCAC	rs72775231	A
TCCCTACACGACGCTCTTCCGATCTNNCCATCATCAGCCTGTCCTTAACTGAGAGAAAACAAAATGGNNGATCGGAAGAGCACACGTCTGAACTCCAGTCAC	rs72775234	A
TCCCTACACGACGCTCTTCCGATCTNNGACAAGGCCTAAAATGGAGAGGCTGATAAGACTCAAGACCNNGATCGGAAGAGCACACGTCTGAACTCCAGTCAC	rs17389232	A
TCCCTACACGACGCTCTTCCGATCTNNAATTCATGAATTAGACTTCAGTTTCCCCTTCCTTTGTCAANNGATCGGAAGAGCACACGTCTGAACTCCAGTCAC	rs72775236	A
TCCCTACACGACGCTCTTCCGATCTNNGAAAGTTGTAATAATTGTCATCAGATAATAACTATTTCAANNGATCGGAAGAGCACACGTCTGAACTCCAGTCAC	rs11596712	A
TCCCTACACGACGCTCTTCCGATCTNNTGAAAAAAAAAAGCTGGCTAAATATTATAAACAAACAGGANNGATCGGAAGAGCACACGTCTGAACTCCAGTCAC	rs72775238	A
TCCCTACACGACGCTCTTCCGATCTNNCTAGGACACCTGCAGCCACACAAAGTGATTCTCCCCTAGANNGATCGGAAGAGCACACGTCTGAACTCCAGTCAC	rs72775239	A
TCCCTACACGACGCTCTTCCGATCTNNTTGTGTAAAGTGAATACACACCTTTACGTAAAGTGAATATNNGATCGGAAGAGCACACGTCTGAACTCCAGTCAC	rs11816084	A
TCCCTACACGACGCTCTTCCGATCTNNCCTTTTTACCTCTCTCCTCAGCAGACTCTGGCTCCCAAAGNNGATCGGAAGAGCACACGTCTGAACTCCAGTCAC	rs12357784	A
TCCCTACACGACGCTCTTCCGATCTNNCTCCTGTCTTTCCCTCACCAACTCTCTCGTGGAATCAAACNNGATCGGAAGAGCACACGTCTGAACTCCAGTCAC	rs72775244	A
TCCCTACACGACGCTCTTCCGATCTNNGTGTTGGCAGGGTTGGTTCATTCTGAGGGGTGTGAGGGATNNGATCGGAAGAGCACACGTCTGAACTCCAGTCAC	rs72775247	A
TCCCTACACGACGCTCTTCCGATCTNNGAAGCAGTGAAGACTTATGATTGGGGACAGGGGAATATCCNNGATCGGAAGAGCACACGTCTGAACTCCAGTCAC	rs72775250	A
TCCCTACACGACGCTCTTCCGATCTNNAACACAGGTCTAGCTTGGAATGGGAAAAGCACTGAAGCTCNNGATCGGAAGAGCACACGTCTGAACTCCAGTCAC	rs17389505	A
TCCCTACACGACGCTCTTCCGATCTNNAAGCAGGGAAAGATAGCCTAAAGCAGAGATTCAGGGGTGGNNGATCGGAAGAGCACACGTCTGAACTCCAGTCAC	rs72775252	A
TCCCTACACGACGCTCTTCCGATCTNNCCGTTTAACCATTACCTTGAGGCACAGACATATGGTCGTGNNGATCGGAAGAGCACACGTCTGAACTCCAGTCAC	rs17389728	A
TCCCTACACGACGCTCTTCCGATCTNNTAGTCTGGAGACTTGGCCTAGGTTGGAGAAGACTGGGTGTNNGATCGGAAGAGCACACGTCTGAACTCCAGTCAC	rs17389770	A
TCCCTACACGACGCTCTTCCGATCTNNTTTTAAAATAAATAGAGATAGGGTCTCATTGTGTTGCCAANNGATCGGAAGAGCACACGTCTGAACTCCAGTCAC	rs72775257	A
TCCCTACACGACGCTCTTCCGATCTNNATTGCAATCAAATTAATTAAAGTGCAAAGCCTTATAATAANNGATCGGAAGAGCACACGTCTGAACTCCAGTCAC	rs72775259	A
TCCCTACACGACGCTCTTCCGATCTNNTCGGCTCACTGCAACCTCTACCTCCTTGGTTCCAGTGATTNNGATCGGAAGAGCACACGTCTGAACTCCAGTCAC	rs111248746	A
TCCCTACACGACGCTCTTCCGATCTNNCTACTGAGTACCTACCAAGAGTCTAGCATTCAAGCCAAATNNGATCGGAAGAGCACACGTCTGAACTCCAGTCAC	rs72775261	A
TCCCTACACGACGCTCTTCCGATCTNNTCCAGTGGAGGAGAGAGGTAAGTAAATAAACACCAGACAANNGATCGGAAGAGCACACGTCTGAACTCCAGTCAC	rs72775262	A
TCCCTACACGACGCTCTTCCGATCTNNATGCAAAGACGTGCCTACTAGGTCTTATGAACGCGCTGGTNNGATCGGAAGAGCACACGTCTGAACTCCAGTCAC	rs12146332	A
TCCCTACACGACGCTCTTCCGATCTNNACAATAGAGCGTCCACACTATTCTTCTACTTGCTGTTTTGNNGATCGGAAGAGCACACGTCTGAACTCCAGTCAC	rs17389938	A
TCCCTACACGACGCTCTTCCGATCTNNTGGCCGGGCACTGTGGCTCACGCCTGCAATCCTAGCACTTNNGATCGGAAGAGCACACGTCTGAACTCCAGTCAC	rs113573208	A
TCCCTACACGACGCTCTTCCGATCTNNATAGATATCACTTCCAATCAGAACATATAACATGTGGATTNNGATCGGAAGAGCACACGTCTGAACTCCAGTCAC	rs72775269	A
TCCCTACACGACGCTCTTCCGATCTNNTGGCCAACATGGAGAAACCACGTCTCTACTGAAAAACACANNGATCGGAAGAGCACACGTCTGAACTCCAGTCAC	rs111256062	A
TCCCTACACGACGCTCTTCCGATCTNNAAATTCTACATAGTAAAGGATTCAGTGGTACTTAGAAGCCNNGATCGGAAGAGCACACGTCTGAACTCCAGTCAC	rs7094266	A
TCCCTACACGACGCTCTTCCGATCTNNGATTTTTTTTTGCATTGAGAAAATGTATCTGTAGGTGATTNNGATCGGAAGAGCACACGTCTGAACTCCAGTCAC	rs7072409	A
TCCCTACACGACGCTCTTCCGATCTNNGCTCTTATGGAACTTGTAGATTATGACCGAGTCTCCACGTNNGATCGGAAGAGCACACGTCTGAACTCCAGTCAC	rs11595047	A
TCCCTACACGACGCTCTTCCGATCTNNGGAGGATAAATGAGATAATATCAAATACGTTCCCAGCTTTNNGATCGGAAGAGCACACGTCTGAACTCCAGTCAC	rs11592436	A
TCCCTACACGACGCTCTTCCGATCTNNAAGCAAAGATGTGTTACTGAAAATGAGAATTGCTCGGCAANNGATCGGAAGAGCACACGTCTGAACTCCAGTCAC	rs57886422	A
TCCCTACACGACGCTCTTCCGATCTNNCAATGAGTTTCCCGCTTAGAGAACAGAGGGGCCTGATATTNNGATCGGAAGAGCACACGTCTGAACTCCAGTCAC	rs72775272	A
TCCCTACACGACGCTCTTCCGATCTNNGAACAGAGGGGCCTGATATAAAGACTAATTTTTATTTAATNNGATCGGAAGAGCACACGTCTGAACTCCAGTCAC	rs68020476	A
TCCCTACACGACGCTCTTCCGATCTNNTTGCACTGACTTCTGGTAAACTCCGTACAGATAAGCACCTNNGATCGGAAGAGCACACGTCTGAACTCCAGTCAC	rs17481499	A
TCCCTACACGACGCTCTTCCGATCTNNATTGAATTATTTATATTCAACTATATTTAAAATGGAAGCCNNGATCGGAAGAGCACACGTCTGAACTCCAGTCAC	rs72775275	A
TCCCTACACGACGCTCTTCCGATCTNNTTCCACAGTTACCCTTTTCATGTGGGGTAAGAGCACCTAANNGATCGGAAGAGCACACGTCTGAACTCCAGTCAC	rs11596994	A
TCCCTACACGACGCTCTTCCGATCTNNTCATGACTGGGAACCCAACATCCATGGCCTGAAGAGTCTCNNGATCGGAAGAGCACACGTCTGAACTCCAGTCAC	rs72775279	A
TCCCTACACGACGCTCTTCCGATCTNNCTCCAAAGCTCTAAGAGAAATTCTAAAGGGTCTCAGCCCCNNGATCGGAAGAGCACACGTCTGAACTCCAGTCAC	rs72775281	A
TCCCTACACGACGCTCTTCCGATCTNNGGAGTAGGAGTGCTTTTATATTCAATCAACCGGCAAACCTNNGATCGGAAGAGCACACGTCTGAACTCCAGTCAC	rs72775283	A
TCCCTACACGACGCTCTTCCGATCTNNTTGGCCTCCCAAAGTGCTAAGATTACAGGTGTGAGCCACCNNGATCGGAAGAGCACACGTCTGAACTCCAGTCAC	rs112069784	A
TCCCTACACGACGCTCTTCCGATCTNNCATGACTTGGAAATCTCTTAATGATTGAATGGGTGATCCTNNGATCGGAAGAGCACACGTCTGAACTCCAGTCAC	rs72775285	A
TCCCTACACGACGCTCTTCCGATCTNNGAGTCCCTTGAATGTCTGGAGATGGTTGTGCTTTGAGATCNNGATCGGAAGAGCACACGTCTGAACTCCAGTCAC	rs11012419	A
TCCCTACACGACGCTCTTCCGATCTNNCATGCTGGCACATTCTCAGAGTTTAATGCCTAACTAAGCANNGATCGGAAGAGCACACGTCTGAACTCCAGTCAC	rs1417184	A
TCCCTACACGACGCTCTTCCGATCTNNGTCCATGTGTTGTACACACATATGACAAGGCTCCCAGTAANNGATCGGAAGAGCACACGTCTGAACTCCAGTCAC	rs11012422	A
TCCCTACACGACGCTCTTCCGATCTNNTGTAATCCCAGCACTTTGGAAGGCCAAGGTGGGCGGATCANNGATCGGAAGAGCACACGTCTGAACTCCAGTCAC	rs11012427	A
TCCCTACACGACGCTCTTCCGATCTNNAGCCATCGCTCCCAGACTAACATTTTTTTACATAGAAAAANNGATCGGAAGAGCACACGTCTGAACTCCAGTCAC	rs11012428	A
TCCCTACACGACGCTCTTCCGATCTNNTCAACCTCACAAAGTGCCGAAACTATAAGCATGAGCCACTNNGATCGGAAGAGCACACGTCTGAACTCCAGTCAC	rs11012433	A
TCCCTACACGACGCTCTTCCGATCTNNTTCATGATTCGATATAATTACATGGTGTTACAGGTACAATNNGATCGGAAGAGCACACGTCTGAACTCCAGTCAC	rs952183	A
TCCCTACACGACGCTCTTCCGATCTNNTATCCTAAGCAAATTAATGAAGAAACAGAAAACCAAATACNNGATCGGAAGAGCACACGTCTGAACTCCAGTCAC	rs7899845	A
TCCCTACACGACGCTCTTCCGATCTNNGTATTCCTGAATCTACATTAAAAAAAAAAAAAAAAAGTGCNNGATCGGAAGAGCACACGTCTGAACTCCAGTCAC	rs57233495	A
TCCCTACACGACGCTCTTCCGATCTNNGCTTTCTGTAATACACATAAGTGAAGAGATACTGGCATTANNGATCGGAAGAGCACACGTCTGAACTCCAGTCAC	rs11012434	A
TCCCTACACGACGCTCTTCCGATCTNNCTTATCAAATTTCTAGTTAAAGTACAAATAGAGGTAACAANNGATCGGAAGAGCACACGTCTGAACTCCAGTCAC	rs12219100	A
TCCCTACACGACGCTCTTCCGATCTNNGAATCAATCAAAAGACCCCACACTGGGGTGAAAAAAAACTNNGATCGGAAGAGCACACGTCTGAACTCCAGTCAC	rs11012436	A
TCCCTACACGACGCTCTTCCGATCTNNTCTGTAACTCAAGCCTAACATTCCTGCTCATCTCTAGGATNNGATCGGAAGAGCACACGTCTGAACTCCAGTCAC	rs10828163	A
TCCCTACACGACGCTCTTCCGATCTNNCTCAAGCCTAACGTTCCTGATCATCTCTAGGATTTGCTCGNNGATCGGAAGAGCACACGTCTGAACTCCAGTCAC	rs11012437	A
TCCCTACACGACGCTCTTCCGATCTNNTGAAAATTAATCTTAAAATATGGTATGAAACACACATCCTNNGATCGGAAGAGCACACGTCTGAACTCCAGTCAC	rs11012438	A
TCCCTACACGACGCTCTTCCGATCTNNAATTAATCTTAAAATGTGGAATGAAACACACATCCTTTTANNGATCGGAAGAGCACACGTCTGAACTCCAGTCAC	rs11012439	A
TCCCTACACGACGCTCTTCCGATCTNNATGTAGTCAGCTAGGCAATACCCCAGCTAAAAGACAGACCNNGATCGGAAGAGCACACGTCTGAACTCCAGTCAC	rs11012440	A
TCCCTACACGACGCTCTTCCGATCTNNTGGTCTCTAATAAAAATTTAAAAAAATTAGCCAGGAGTGGNNGATCGGAAGAGCACACGTCTGAACTCCAGTCAC	rs11012441	A
TCCCTACACGACGCTCTTCCGATCTNNGCAAGAGGAGTATGTCTCCATATCTACCCCTAGAAAGTCTNNGATCGGAAGAGCACACGTCTGAACTCCAGTCAC	rs11012442	A
TCCCTACACGACGCTCTTCCGATCTNNGATAAATAGCACAGTGAAAACTGCAATCTAAATGTCTCAANNGATCGGAAGAGCACACGTCTGAACTCCAGTCAC	rs11012443	A
TCCCTACACGACGCTCTTCCGATCTNNTACAGAGTAGAATTGCATCATGAAATGCTTATCCCATAGANNGATCGGAAGAGCACACGTCTGAACTCCAGTCAC	rs11012444	A
TCCCTACACGACGCTCTTCCGATCTNNTGTTTTAAGCAAACATAATATAACACAGTTTTTTTTAATTNNGATCGGAAGAGCACACGTCTGAACTCCAGTCAC	rs11012445	A
TCCCTACACGACGCTCTTCCGATCTNNAGGCTCTCACTCTGTCACCAGCGCTGGAATACAGTGGTGCNNGATCGGAAGAGCACACGTCTGAACTCCAGTCAC	rs67955617	A
TCCCTACACGACGCTCTTCCGATCTNNGGACTACAAGCACATGCCAACATGGTCATCTAATTTTTAANNGATCGGAAGAGCACACGTCTGAACTCCAGTCAC	rs60375467	A
TCCCTACACGACGCTCTTCCGATCTNNGGTGACCACCAGTAACCAGAGGCCTTACACTTGGTAAAGTNNGATCGGAAGAGCACACGTCTGAACTCCAGTCAC	rs7917492	A
TCCCTACACGACGCTCTTCCGATCTNNTACCTCAAGACCAGTGTGAAGGCAAAGATCCACATCTGCCNNGATCGGAAGAGCACACGTCTGAACTCCAGTCAC	rs7914197	A
TCCCTACACGACGCTCTTCCGATCTNNCCCATCTCTTCCTGGCTGCATTTGTTAACAAAAGTGAGACNNGATCGGAAGAGCACACGTCTGAACTCCAGTCAC	rs7901323	A
TCCCTACACGACGCTCTTCCGATCTNNGCCTTTGTTAACAAAAGTGAGACTGATTTTCTTTGTAAGTNNGATCGGAAGAGCACACGTCTGAACTCCAGTCAC	rs11012446	A
TCCCTACACGACGCTCTTCCGATCTNNATCCTACCACCTCAGCCTCACAAAGTGCAGTGATTATAGGNNGATCGGAAGAGCACACGTCTGAACTCCAGTCAC	rs11012447	A
TCCCTACACGACGCTCTTCCGATCTNNAAGTGCAGTGATTATAGGCATAAGCCACTGTGCCCAGCCCNNGATCGGAAGAGCACACGTCTGAACTCCAGTCAC	rs11012448	A
TCCCTACACGACGCTCTTCCGATCTNNGTCAAACTTGATGTGTCCTAAAGATAGAGAACACATAAAGNNGATCGGAAGAGCACACGTCTGAACTCCAGTCAC	rs11012449	A
TCCCTACACGACGCTCTTCCGATCTNNACAGCACCCTGACTTGCTTATGAAAACTCAGCACTCCTTANNGATCGGAAGAGCACACGTCTGAACTCCAGTCAC	rs1832677	A
TCCCTACACGACGCTCTTCCGATCTNNACCGGTGATAGGGGCCTCTATTCCACTGGACTGACAGCTANNGATCGGAAGAGCACACGTCTGAACTCCAGTCAC	rs1832678	A
TCCCTACACGACGCTCTTCCGATCTNNGCCCCTCTTAGCAGCCTTGACCTAATGCCAGTTTCACCTCNNGATCGGAAGAGCACACGTCTGAACTCCAGTCAC	rs1361452	A
TCCCTACACGACGCTCTTCCGATCTNNCAATGCCAATGACAATTGGAGTTGAGATATCTGGCATTTCNNGATCGGAAGAGCACACGTCTGAACTCCAGTCAC	rs11012450	A
TCCCTACACGACGCTCTTCCGATCTNNTTGAGATATCTGGCATTTCAAACAAAAAGAATTCCTAACTNNGATCGGAAGAGCACACGTCTGAACTCCAGTCAC	rs11012451	A
TCCCTACACGACGCTCTTCCGATCTNNTTACAGAAAATTCGGAAACATCGTCAAATGTTGTTTAAATNNGATCGGAAGAGCACACGTCTGAACTCCAGTCAC	rs960941	A
TCCCTACACGACGCTCTTCCGATCTNNAAGGCTGGAAGCTGATCTTATAGGATGGGTAGGGTAAGGTNNGATCGGAAGAGCACACGTCTGAACTCCAGTCAC	rs11012455	A
TCCCTACACGACGCTCTTCCGATCTNNTACCCTAACCCTTGGGAACAGAAGAGGGGAGTATGGCAACNNGATCGGAAGAGCACACGTCTGAACTCCAGTCAC	rs11012456	A
TCCCTACACGACGCTCTTCCGATCTNNAACCTGGTGAAAAATCCTGAATTTCCAACTTGGAGCTGGGNNGATCGGAAGAGCACACGTCTGAACTCCAGTCAC	rs10828164	A
TCCCTACACGACGCTCTTCCGATCTNNGTACTGCAAAAGTATGTGCAAAACTTCAACGCAAAAGTATNNGATCGGAAGAGCACACGTCTGAACTCCAGTCAC	rs10508636	A
TCCCTACACGACGCTCTTCCGATCTNNTCTTTCCGTAAGTATTCCAATTTTATTTGGCAATAAACTTNNGATCGGAAGAGCACACGTCTGAACTCCAGTCAC	rs11012457	A
TCCCTACACGACGCTCTTCCGATCTNNAGTCTCCAGGAAAATGCTAAACATGACATGTACAATAAGGNNGATCGGAAGAGCACACGTCTGAACTCCAGTCAC	rs11012458	A
TCCCTACACGACGCTCTTCCGATCTNNAGAAAGTAATGACCCTAATATATCTATTTTGCAAATCTATNNGATCGGAAGAGCACACGTCTGAACTCCAGTCAC	rs11012459	A
TCCCTACACGACGCTCTTCCGATCTNNCAGGCCACGGACTGGTACCAGTCCATGGCCTGCTAGGAGCNNGATCGGAAGAGCACACGTCTGAACTCCAGTCAC	rs117023276	A
TCCCTACACGACGCTCTTCCGATCTNNGGCATTACAAGCATGGAGAATGGACGCTGCTCTACAAGGCNNGATCGGAAGAGCACACGTCTGAACTCCAGTCAC	rs11012460	A
TCCCTACACGACGCTCTTCCGATCTNNAATAATTCAGCAACTCTTCACTTCCCTTCAAAATTCCCAANNGATCGGAAGAGCACACGTCTGAACTCCAGTCAC	rs11012461	A
TCCCTACACGACGCTCTTCCGATCTNNTTCAAAATTCCCAAAGTACATTTCAATTAGATCCTAACTGNNGATCGGAAGAGCACACGTCTGAACTCCAGTCAC	rs11012462	A
TCCCTACACGACGCTCTTCCGATCTNNCTTTCTCATTTCTTCACCTATCTTTGTGCTTTCTCAGTGANNGATCGGAAGAGCACACGTCTGAACTCCAGTCAC	rs7893606	A
TCCCTACACGACGCTCTTCCGATCTNNGCTTTCTCAGTGACCTCAAAGTCACTTATGCAATGCACTCNNGATCGGAAGAGCACACGTCTGAACTCCAGTCAC	rs7893616	A
TCCCTACACGACGCTCTTCCGATCTNNGACCAAGGCTAACTTCTGCATGGTGAGGAAGAACTGCAATNNGATCGGAAGAGCACACGTCTGAACTCCAGTCAC	rs11012463	A
TCCCTACACGACGCTCTTCCGATCTNNGGAAGGAGATTTTCCAGGGATCCTTCTGTACCAGCACCCCNNGATCGGAAGAGCACACGTCTGAACTCCAGTCAC	rs1417185	A
TCCCTACACGACGCTCTTCCGATCTNNTCAACAATCCTCTGACATCACTAGGACTTCCACTGACTCCNNGATCGGAAGAGCACACGTCTGAACTCCAGTCAC	rs11012464	A
TCCCTACACGACGCTCTTCCGATCTNNAATTATCCTCAAATACTCTACCCTTCTGCTGTCTGTGGGANNGATCGGAAGAGCACACGTCTGAACTCCAGTCAC	rs58576465	A
TCCCTACACGACGCTCTTCCGATCTNNCAGAAAAACCCTTTCCACAATACTCTGCCTCCTCAACATTNNGATCGGAAGAGCACACGTCTGAACTCCAGTCAC	rs57472807	A
TCCCTACACGACGCTCTTCCGATCTNNCAACAGAACAAAGCAGAAGACCCAGCAATAGAACCCCACTNNGATCGGAAGAGCACACGTCTGAACTCCAGTCAC	rs11012465	A
TCCCTACACGACGCTCTTCCGATCTNNCCAATTACTGCTGAAATATAAGCAGAACCTGTGATGTTAANNGATCGGAAGAGCACACGTCTGAACTCCAGTCAC	rs67902595	A
TCCCTACACGACGCTCTTCCGATCTNNTTTGAAGGTGATGGCCTTCAGGAGGTAATTAGATCATGAGNNGATCGGAAGAGCACACGTCTGAACTCCAGTCAC	rs58569619	A
TCCCTACACGACGCTCTTCCGATCTNNATCATGAGGACAGGGACCTAGTGATTGGGATTAGTGTCCTNNGATCGGAAGAGCACACGTCTGAACTCCAGTCAC	rs76376228	A
TCCCTACACGACGCTCTTCCGATCTNNGGTATCTTGTTGTAACAACACAAACTAAGACACTTACCTCNNGATCGGAAGAGCACACGTCTGAACTCCAGTCAC	rs60905445	A
TCCCTACACGACGCTCTTCCGATCTNNTTCCATGTCTTTGCCATTGAGAATGGTGCTGTGATAAACANNGATCGGAAGAGCACACGTCTGAACTCCAGTCAC	rs80333144	A
TCCCTACACGACGCTCTTCCGATCTNNTATATGAACATTTTTTATGATTTATGACTATCTAGCATCTNNGATCGGAAGAGCACACGTCTGAACTCCAGTCAC	rs7915328	A
TCCCTACACGACGCTCTTCCGATCTNNCAGGCACCATGCAGAATTCATCTTTTGAGTGACGACAGAGNNGATCGGAAGAGCACACGTCTGAACTCCAGTCAC	rs60226954	A
TCCCTACACGACGCTCTTCCGATCTNNAAAATTTACTTTCTCCGTAAGCCAACTACAATGAAATCAGNNGATCGGAAGAGCACACGTCTGAACTCCAGTCAC	rs72790536	A
TCCCTACACGACGCTCTTCCGATCTNNAAATTAAACCACAGCCACAAAAACAACTGCAGCCATCTCANNGATCGGAAGAGCACACGTCTGAACTCCAGTCAC	rs11012466	A
TCCCTACACGACGCTCTTCCGATCTNNACTGATAACATAAACAGTCAATTAACACATAGTTAGTATGNNGATCGGAAGAGCACACGTCTGAACTCCAGTCAC	rs11012467	A
TCCCTACACGACGCTCTTCCGATCTNNCTTACAAACACCTCTCCCAAAAGCCAACCACAGACATCCANNGATCGGAAGAGCACACGTCTGAACTCCAGTCAC	rs11012468	A
TCCCTACACGACGCTCTTCCGATCTNNTTCAGTGTAATTATGAGGGAATTTGCAGCAGCACCGCACGNNGATCGGAAGAGCACACGTCTGAACTCCAGTCAC	rs11012469	A
TCCCTACACGACGCTCTTCCGATCTNNTGCCACTACGATGTGATACACTTTCAAGGTTCTCCCATGTNNGATCGGAAGAGCACACGTCTGAACTCCAGTCAC	rs10828167	A
TCCCTACACGACGCTCTTCCGATCTNNATTGTCCTAGGTCTACTGGATCGATGCCTTATCACCAACCNNGATCGGAAGAGCACACGTCTGAACTCCAGTCAC	rs7906562	A
TCCCTACACGACGCTCTTCCGATCTNNTTCCACTAGTTCTCAGGGGACTAGACTGTAATGTGAAGCTNNGATCGGAAGAGCACACGTCTGAACTCCAGTCAC	rs7097882	A
TCCCTACACGACGCTCTTCCGATCTNNCATTAGGTACCCCCATCCCAACAGCCGCAAACCACACCAANNGATCGGAAGAGCACACGTCTGAACTCCAGTCAC	rs7914249	A
TCCCTACACGACGCTCTTCCGATCTNNTCATGCTAACCTAAGAAAGATATGGGGAAGATTAAATGAGNNGATCGGAAGAGCACACGTCTGAACTCCAGTCAC	rs7898090	A
TCCCTACACGACGCTCTTCCGATCTNNAAAGAAAACATAGTATATAAAGGATTTGCTCTTGAAACATNNGATCGGAAGAGCACACGTCTGAACTCCAGTCAC	rs72795018	A
TCCCTACACGACGCTCTTCCGATCTNNGGGGAAATTCGGCTTGGTCAGTCCCCATAACTTGGAGTATNNGATCGGAAGAGCACACGTCTGAACTCCAGTCAC	rs1572202	A
TCCCTACACGACGCTCTTCCGATCTNNTAACACTGGATGATCATCTAGGTCCAGGACTGTGACTCCANNGATCGGAAGAGCACACGTCTGAACTCCAGTCAC	rs11593591	A
TCCCTACACGACGCTCTTCCGATCTNNCTGTGACTCCAGAGGATGAAATGTCTATCTGGCATATTCCNNGATCGGAAGAGCACACGTCTGAACTCCAGTCAC	rs11591669	A
TCCCTACACGACGCTCTTCCGATCTNNCTGTAATTGAAAGGAAAGAACAGACATTGACAGGACAAAGNNGATCGGAAGAGCACACGTCTGAACTCCAGTCAC	rs17407080	A
TCCCTACACGACGCTCTTCCGATCTNNGACTGCTACAGCATCTGACATTCTACCTTTAGAAACAGTTNNGATCGGAAGAGCACACGTCTGAACTCCAGTCAC	rs17485517	A
TCCCTACACGACGCTCTTCCGATCTNNATCCATCACAAACAGATTGAGGTGGGGGCAGCTGCTCACCNNGATCGGAAGAGCACACGTCTGAACTCCAGTCAC	rs6593427	A
TCCCTACACGACGCTCTTCCGATCTNNTTATCTCTCCCAAGGCCGTATCTCCCCACCCGACCTGCACNNGATCGGAAGAGCACACGTCTGAACTCCAGTCAC	rs72795026	A
TCCCTACACGACGCTCTTCCGATCTNNCTCTCCCAAGGCCGTGTCTACCCACCCGACCTGCACTCTGNNGATCGGAAGAGCACACGTCTGAACTCCAGTCAC	rs72795028	A
TCCCTACACGACGCTCTTCCGATCTNNAACTCCAAGAACTTGCATCATCTAACAATATCTCCAGCTANNGATCGGAAGAGCACACGTCTGAACTCCAGTCAC	rs17407137	A
TCCCTACACGACGCTCTTCCGATCTNNACCTTTTGTCCTAGGCCTGATCCTATGAATACCAGACTTTNNGATCGGAAGAGCACACGTCTGAACTCCAGTCAC	rs7084757	A
TCCCTACACGACGCTCTTCCGATCTNNTTTTCCTGTAGCAACTTACAGATGGACGGCTCATAGGCTCNNGATCGGAAGAGCACACGTCTGAACTCCAGTCAC	rs76471893	A
TCCCTACACGACGCTCTTCCGATCTNNGATCATCATCATCAGTCCCAGGTGGTGCCCTCTAGAGGAANNGATCGGAAGAGCACACGTCTGAACTCCAGTCAC	rs72795029	A
TCCCTACACGACGCTCTTCCGATCTNNTCCAGGCTCTGTGGATCCCAGCAGCAGGCTCTTGGGGGCANNGATCGGAAGAGCACACGTCTGAACTCCAGTCAC	rs28373082	A
TCCCTACACGACGCTCTTCCGATCTNNGAATTTGCTCAGAGCTTAGATGGCAAGTCCACTTTACACCNNGATCGGAAGAGCACACGTCTGAACTCCAGTCAC	rs72795030	A
TCCCTACACGACGCTCTTCCGATCTNNGAACCCACTGGGTCCTTATAATGTATCAGATGCTGAGCTGNNGATCGGAAGAGCACACGTCTGAACTCCAGTCAC	rs2184771	A
TCCCTACACGACGCTCTTCCGATCTNNACGGGAAATGATAACACTCATATTTACTGAGTGTTTCTTANNGATCGGAAGAGCACACGTCTGAACTCCAGTCAC	rs11593437	A
TCCCTACACGACGCTCTTCCGATCTNNTTTACTGAGTGTTTCTTACATGCTAGTCACTGATCTAAGTNNGATCGGAAGAGCACACGTCTGAACTCCAGTCAC	rs11593439	A
TCCCTACACGACGCTCTTCCGATCTNNTCATTTCGTTCTTGAAATGACCCATTTTACAGATCAGGAANNGATCGGAAGAGCACACGTCTGAACTCCAGTCAC	rs72795035	A
TCCCTACACGACGCTCTTCCGATCTNNAAATGACAAGACTATATAGATAATAAATGGTAAAGCCCAANNGATCGGAAGAGCACACGTCTGAACTCCAGTCAC	rs72795036	A
TCCCTACACGACGCTCTTCCGATCTNNCCCAAAAGGAGTGTTCCACAGGCAAGGAAGCAGAAGCTCTNNGATCGGAAGAGCACACGTCTGAACTCCAGTCAC	rs11595472	A
TCCCTACACGACGCTCTTCCGATCTNNATACTTCTATTATAAATATATGTCATGTGGGTGTTAAAATNNGATCGGAAGAGCACACGTCTGAACTCCAGTCAC	rs72795038	A
TCCCTACACGACGCTCTTCCGATCTNNATAAATATCTGTCATGTGGATGTTAAAATTAAATGGCAATNNGATCGGAAGAGCACACGTCTGAACTCCAGTCAC	rs72795039	A
TCCCTACACGACGCTCTTCCGATCTNNTCCATTGGGAGGGAACCCAAGGAGGAGATGACAGAGTTGGNNGATCGGAAGAGCACACGTCTGAACTCCAGTCAC	rs72795042	A
TCCCTACACGACGCTCTTCCGATCTNNACTTGTGTTTTGTTTATGTAACAGCTAGATTTGGGTCAGGNNGATCGGAAGAGCACACGTCTGAACTCCAGTCAC	rs72795043	A
TCCCTACACGACGCTCTTCCGATCTNNTATTTTAAGTTCAGTGCCAACTTAAGCCCAATACTTTGCANNGATCGGAAGAGCACACGTCTGAACTCCAGTCAC	rs11596551	A
TCCCTACACGACGCTCTTCCGATCTNNTTTTTTCTTTTTTTGAGACAGAGTTTCACTCTTGTTTCCCNNGATCGGAAGAGCACACGTCTGAACTCCAGTCAC	rs1977897	A
TCCCTACACGACGCTCTTCCGATCTNNACTTCAGCCTCTCGAGTAGATGGGATTATAAGCATGAGCCNNGATCGGAAGAGCACACGTCTGAACTCCAGTCAC	rs1977896	A
TCCCTACACGACGCTCTTCCGATCTNNAAAAAAATTTTTTTTTATAATCTAAGTTCTAGAGTACATGNNGATCGGAAGAGCACACGTCTGAACTCCAGTCAC	rs2225820	A
TCCCTACACGACGCTCTTCCGATCTNNTCAATTCCCACCTATGAGTAAGAACATGTGGTGTTTGGTTNNGATCGGAAGAGCACACGTCTGAACTCCAGTCAC	rs113321184	A
TCCCTACACGACGCTCTTCCGATCTNNATTGTTGGACATTTGGGTTAGTTCCAAGTCTTTGCTATTGNNGATCGGAAGAGCACACGTCTGAACTCCAGTCAC	rs113297581	A
TCCCTACACGACGCTCTTCCGATCTNNCTCTCCTCTCTCCCCACCCACTACCCCTAACTCTTGGCAANNGATCGGAAGAGCACACGTCTGAACTCCAGTCAC	rs2152637	A
TCCCTACACGACGCTCTTCCGATCTNNGGGATTTACCTAATTTAATAATGTCATATAAAAGATATAANNGATCGGAAGAGCACACGTCTGAACTCCAGTCAC	rs75604060	A
TCCCTACACGACGCTCTTCCGATCTNNTGTTGTTGAGTAGTAAGAGATCTTTGTATATTCTGAGTATNNGATCGGAAGAGCACACGTCTGAACTCCAGTCAC	rs72795048	A
TCCCTACACGACGCTCTTCCGATCTNNTAGATCCTTATTAGATATAAGATTAACAAATATTTGCACCNNGATCGGAAGAGCACACGTCTGAACTCCAGTCAC	rs7077487	A
TCCCTACACGACGCTCTTCCGATCTNNACCTCAGGTGATTCACCCCACTTTGGCTTCCCAAAGTGCTNNGATCGGAAGAGCACACGTCTGAACTCCAGTCAC	rs11594054	A
TCCCTACACGACGCTCTTCCGATCTNNGTGGTTTCTTTGGCATTTTATACATGTAAATCATGTCATTNNGATCGGAAGAGCACACGTCTGAACTCCAGTCAC	rs72795050	A
TCCCTACACGACGCTCTTCCGATCTNNACATATAATGCTAGCTGTGAGTTTTTCAAAAATCACCTTTNNGATCGGAAGAGCACACGTCTGAACTCCAGTCAC	rs72795051	A
TCCCTACACGACGCTCTTCCGATCTNNCTAACATAAATAAAGAAACATCAACCCAACAACTGGAAAANNGATCGGAAGAGCACACGTCTGAACTCCAGTCAC	rs11597961	A
TCCCTACACGACGCTCTTCCGATCTNNGCATTAAAAAAGCCTGCTCATCTACAGCTCTTTTCCAATCNNGATCGGAAGAGCACACGTCTGAACTCCAGTCAC	rs72795052	A
TCCCTACACGACGCTCTTCCGATCTNNGCAATAACATATACTGGGGAGGAAAGAAAGTGCAATATGANNGATCGGAAGAGCACACGTCTGAACTCCAGTCAC	rs77080987	A
TCCCTACACGACGCTCTTCCGATCTNNTTTGTATTTTTAGTAGAGAAGGGGTTTCTCCATGTTGGTCNNGATCGGAAGAGCACACGTCTGAACTCCAGTCAC	rs11593423	A
TCCCTACACGACGCTCTTCCGATCTNNTAGAAAGTGCTTGCCTGGGACTCCAGTGCTGCTAGACAGGNNGATCGGAAGAGCACACGTCTGAACTCCAGTCAC	rs75602989	A
TCCCTACACGACGCTCTTCCGATCTNNGGGGAGTCTATGATGTGTTATCTGGGACCAAAAGACTGCANNGATCGGAAGAGCACACGTCTGAACTCCAGTCAC	rs72795054	A
TCCCTACACGACGCTCTTCCGATCTNNACCTCATGTAAGTAGCATTATAGAATATTTGTCTTTTTGTNNGATCGGAAGAGCACACGTCTGAACTCCAGTCAC	rs11239119	A
TCCCTACACGACGCTCTTCCGATCTNNGTCTTGAGTTAATTTTTGTATATAGTGAAGAGTAAGGATANNGATCGGAAGAGCACACGTCTGAACTCCAGTCAC	rs72795057	A
TCCCTACACGACGCTCTTCCGATCTNNGTTTTTTTAGTTCTCCTTGAAGAAATCTTTTACTTCCTTGNNGATCGGAAGAGCACACGTCTGAACTCCAGTCAC	rs72795059	A
TCCCTACACGACGCTCTTCCGATCTNNATGACTGAGCATGTGGCCAATCTTAGAATATGTTCCATACNNGATCGGAAGAGCACACGTCTGAACTCCAGTCAC	rs7915459	A
TCCCTACACGACGCTCTTCCGATCTNNGTGGTTGTTGGGTAGAGTGATCTGTACATGTCTATTAGGTNNGATCGGAAGAGCACACGTCTGAACTCCAGTCAC	rs6593429	A
TCCCTACACGACGCTCTTCCGATCTNNGATTTTTGCATGTTTATCTAGTATCCTGTGACCTGGCTGANNGATCGGAAGAGCACACGTCTGAACTCCAGTCAC	rs79569730	A
TCCCTACACGACGCTCTTCCGATCTNNGTCCCAGCTGACATGATATATTGTGCCACCACCCTACCACNNGATCGGAAGAGCACACGTCTGAACTCCAGTCAC	rs17407291	A
TCCCTACACGACGCTCTTCCGATCTNNTGGTGGAAAATGCTTTCAGACAGTTCCCACTAGCAAATTCNNGATCGGAAGAGCACACGTCTGAACTCCAGTCAC	rs72795073	A
TCCCTACACGACGCTCTTCCGATCTNNCTACCCCTGCTGCCTTTCCAGGGAAGACTGGATGTGTCCCNNGATCGGAAGAGCACACGTCTGAACTCCAGTCAC	rs17156606	A
TCCCTACACGACGCTCTTCCGATCTNNGGCTGGACCTTCTTGTGGAAGATGTTTTATCTAGGAAGCTNNGATCGGAAGAGCACACGTCTGAACTCCAGTCAC	rs11597734	A
TCCCTACACGACGCTCTTCCGATCTNNTCCAGCTTACGTCTCCAAGAGACCATCAAGGACCCAGGATNNGATCGGAAGAGCACACGTCTGAACTCCAGTCAC	rs72795075	A
TCCCTACACGACGCTCTTCCGATCTNNGCTGTGTGCTCAGGAGGAAAACAGACTGGGTTTGAGGATCNNGATCGGAAGAGCACACGTCTGAACTCCAGTCAC	rs11598916	A
TCCCTACACGACGCTCTTCCGATCTNNTTGGAGATGTCAGCAGACTACCCAGCATGGACACACATTTNNGATCGGAAGAGCACACGTCTGAACTCCAGTCAC	rs17485977	A
TCCCTACACGACGCTCTTCCGATCTNNAGATCTGATATTCCCCAGTAACTTCCTATCCCAGGACTCTNNGATCGGAAGAGCACACGTCTGAACTCCAGTCAC	rs17486117	A
TCCCTACACGACGCTCTTCCGATCTNNAGTATAGAGACAGATTTCTAATTTTGAGTAGCTGTATAGTNNGATCGGAAGAGCACACGTCTGAACTCCAGTCAC	rs72795078	A
TCCCTACACGACGCTCTTCCGATCTNNGCCACCTTCTTGCTGTGTCATCCCACGGCAGAGAGGGGAGNNGATCGGAAGAGCACACGTCTGAACTCCAGTCAC	rs7068018	A
TCCCTACACGACGCTCTTCCGATCTNNCCCCATGACTTCATCTAAAACTAATTACCTCCCAAAGGCCNNGATCGGAAGAGCACACGTCTGAACTCCAGTCAC	rs72795079	A
TCCCTACACGACGCTCTTCCGATCTNNTAATTTAGAGAAAAAATGGATGGAAGAGAAACTTTGGGGCNNGATCGGAAGAGCACACGTCTGAACTCCAGTCAC	rs34071927	A
TCCCTACACGACGCTCTTCCGATCTNNCAGGGTGAATTTGCAGTGCAGAGTCTCCATTCCCTTCAGGNNGATCGGAAGAGCACACGTCTGAACTCCAGTCAC	rs17156636	A
TCCCTACACGACGCTCTTCCGATCTNNAAACACCACAGCATCTGGGAATTCTCCTTCATTCAGCTGTNNGATCGGAAGAGCACACGTCTGAACTCCAGTCAC	rs17408225	A
TCCCTACACGACGCTCTTCCGATCTNNGTCATTGTAGACTGGCTTTATTCTACCCTCTATGCCCTGGNNGATCGGAAGAGCACACGTCTGAACTCCAGTCAC	rs11593585	A
TCCCTACACGACGCTCTTCCGATCTNNCACCCTCATCCGCTGACTCATCTGGGAGAGACAACGTGATNNGATCGGAAGAGCACACGTCTGAACTCCAGTCAC	rs11598774	A
TCCCTACACGACGCTCTTCCGATCTNNTGGGATACATGTGCAGAACATGCAGGTTTGTTACATAGGTNNGATCGGAAGAGCACACGTCTGAACTCCAGTCAC	rs111415059	A
TCCCTACACGACGCTCTTCCGATCTNNCCTGGGAGGAGGAGGTTGCAGTAAGCCAAGAGCGCACCACNNGATCGGAAGAGCACACGTCTGAACTCCAGTCAC	rs57991475	A
TCCCTACACGACGCTCTTCCGATCTNNTCTTGCACGTGTCTCCGAGAGTCCTGTGCAGTTACTTTTCNNGATCGGAAGAGCACACGTCTGAACTCCAGTCAC	rs17487074	A
TCCCTACACGACGCTCTTCCGATCTNNTGGCCTTGTGGATTCAGGAAGGGTGGGCAGAGAACCTGTCNNGATCGGAAGAGCACACGTCTGAACTCCAGTCAC	rs11595335	A
TCCCTACACGACGCTCTTCCGATCTNNCTATGTGAAAAGAACAAACATATAATTGACTGGTGTACCTNNGATCGGAAGAGCACACGTCTGAACTCCAGTCAC	rs72796922	A
TCCCTACACGACGCTCTTCCGATCTNNACCAGCGGCTCTTTCCTTCAGGGCTGGCCATCTGTGACTCNNGATCGGAAGAGCACACGTCTGAACTCCAGTCAC	rs11592569	A
TCCCTACACGACGCTCTTCCGATCTNNCCCATCTTTCATCCATTTTATTCAATTTTATTTTCTTTTTNNGATCGGAAGAGCACACGTCTGAACTCCAGTCAC	rs12265349	A
TCCCTACACGACGCTCTTCCGATCTNNATCAGTCTTGCCATTTGGGATACATCCTTCATGGCCATGGNNGATCGGAAGAGCACACGTCTGAACTCCAGTCAC	rs7898623	A
TCCCTACACGACGCTCTTCCGATCTNNCACAGACCCTGTGGGATAAAAGATTTTAGTAGGGCTCCTGNNGATCGGAAGAGCACACGTCTGAACTCCAGTCAC	rs7905651	A
TCCCTACACGACGCTCTTCCGATCTNNTGGTGGGTTCATTTTCATTATGTAATTTTATTTACCTGCTNNGATCGGAAGAGCACACGTCTGAACTCCAGTCAC	rs10900077	A
TCCCTACACGACGCTCTTCCGATCTNNGACCACTCCCAGAGCGGCCATGTATAGACCTACCCCCGGGNNGATCGGAAGAGCACACGTCTGAACTCCAGTCAC	rs111442290	A
TCCCTACACGACGCTCTTCCGATCTNNATTGGGTAGTAGAAACTCTACATGCCCGTGCAGGACTCCGNNGATCGGAAGAGCACACGTCTGAACTCCAGTCAC	rs113920486	A
TCCCTACACGACGCTCTTCCGATCTNNGCTAGAAAGAATAGAGAACAACCCCCACCACACAATGGGANNGATCGGAAGAGCACACGTCTGAACTCCAGTCAC	rs642743	A
TCCCTACACGACGCTCTTCCGATCTNNAGAGCGAGAGCGAGACTCCATCTAAAACAAACAAACAAACNNGATCGGAAGAGCACACGTCTGAACTCCAGTCAC	rs789207	A
TCCCTACACGACGCTCTTCCGATCTNNGAAGGATGAGGTGAGAGGAATGCTTGAGCCCAGGAGTTCANNGATCGGAAGAGCACACGTCTGAACTCCAGTCAC	rs789208	A
TCCCTACACGACGCTCTTCCGATCTNNTATCCAGGGATTGATAGAGAAGACATTGCAAATCAGCAGANNGATCGGAAGAGCACACGTCTGAACTCCAGTCAC	rs593151	A
TCCCTACACGACGCTCTTCCGATCTNNAGTTAAAAGAAAGTATTTAAAGTAGGATGAGCCATATACTNNGATCGGAAGAGCACACGTCTGAACTCCAGTCAC	rs591784	A
TCCCTACACGACGCTCTTCCGATCTNNAGGGTGTTTATTTGCTTTCAGAAAAGTTACACCTGTATGTNNGATCGGAAGAGCACACGTCTGAACTCCAGTCAC	rs624159	A
TCCCTACACGACGCTCTTCCGATCTNNGAGCAATGTCCCTGCTTCTAATCCTTCTTATCACCTACAGNNGATCGGAAGAGCACACGTCTGAACTCCAGTCAC	rs1147610	A
TCCCTACACGACGCTCTTCCGATCTNNAAAGAAAACACAGAGGCTAAAAAAATCATAATTTAAAAAANNGATCGGAAGAGCACACGTCTGAACTCCAGTCAC	rs569856	A
TCCCTACACGACGCTCTTCCGATCTNNTAAAAAATCACATTTAGCTATATTATTTTCAGGTAACTAANNGATCGGAAGAGCACACGTCTGAACTCCAGTCAC	rs569967	A
TCCCTACACGACGCTCTTCCGATCTNNGGCATGATGATGCAATCCTAAAATGAGTTTTTGAGGTAAGNNGATCGGAAGAGCACACGTCTGAACTCCAGTCAC	rs527154	A
TCCCTACACGACGCTCTTCCGATCTNNTATTGTCATTGTAAATAAAATGATATGGCATAAAGTGCAANNGATCGGAAGAGCACACGTCTGAACTCCAGTCAC	rs479879	A
TCCCTACACGACGCTCTTCCGATCTNNAAGCATCCAGGTTTACTTCAACTCTGTTGAGCCATCTCATNNGATCGGAAGAGCACACGTCTGAACTCCAGTCAC	rs686441	A
TCCCTACACGACGCTCTTCCGATCTNNACAAACTTCAGATGAAGCAACCAGGTGTCCTGCCTTATTANNGATCGGAAGAGCACACGTCTGAACTCCAGTCAC	rs614406	A
TCCCTACACGACGCTCTTCCGATCTNNCCTCCCTTTCCAGTGTGCCAATGATTTAGTATAAAATTTCNNGATCGGAAGAGCACACGTCTGAACTCCAGTCAC	rs584309	A
TCCCTACACGACGCTCTTCCGATCTNNAGGACAGCCTCTGCCTCCTATTCGCATTGCTTTGCCCATGNNGATCGGAAGAGCACACGTCTGAACTCCAGTCAC	rs678292	A
TCCCTACACGACGCTCTTCCGATCTNNTACCCAATAACATATAAATAGGGATTTAAATCTTGCAACANNGATCGGAAGAGCACACGTCTGAACTCCAGTCAC	rs677904	A
TCCCTACACGACGCTCTTCCGATCTNNGTCGCCCAGGCTGGAGTGCAATGGCGGAATCTTGGCTCACNNGATCGGAAGAGCACACGTCTGAACTCCAGTCAC	rs611372	A
TCCCTACACGACGCTCTTCCGATCTNNGTTCAATATTATTTTTAAAACTACTTTCACATTTTTTTTTNNGATCGGAAGAGCACACGTCTGAACTCCAGTCAC	rs674850	A
TCCCTACACGACGCTCTTCCGATCTNNTGCTGAACCCTGCACTACAATGAAGATATTATTCCACTATNNGATCGGAAGAGCACACGTCTGAACTCCAGTCAC	rs556292	A
TCCCTACACGACGCTCTTCCGATCTNNTCAGTGAAGTCCATCCTAAAGTTGTTACAGAAATCAAGGTNNGATCGGAAGAGCACACGTCTGAACTCCAGTCAC	rs515910	A
TCCCTACACGACGCTCTTCCGATCTNNTGAGGACTGTCCTGATTCAAAGCAGTTCATAGAACCTCTCNNGATCGGAAGAGCACACGTCTGAACTCCAGTCAC	rs601019	A
TCCCTACACGACGCTCTTCCGATCTNNTGTTCGAGTTTCTAAATGTAGCTATGACAAGCAAACAGAGNNGATCGGAAGAGCACACGTCTGAACTCCAGTCAC	rs789970	A
TCCCTACACGACGCTCTTCCGATCTNNTTTTAATATTTACAGATTGATCTTAGTAAGGACAATTGGANNGATCGGAAGAGCACACGTCTGAACTCCAGTCAC	rs581686	A
TCCCTACACGACGCTCTTCCGATCTNNATCGCTTGAACCTGGGAGGAGGAAGTTGCAGTGAGCCAAGNNGATCGGAAGAGCACACGTCTGAACTCCAGTCAC	rs7098122	A
TCCCTACACGACGCTCTTCCGATCTNNACATACAGCATATTATATAATTTCATCTATCATCATCACCNNGATCGGAAGAGCACACGTCTGAACTCCAGTCAC	rs687557	A
TCCCTACACGACGCTCTTCCGATCTNNAATAATTATTTTTAAAAATAAATAAATTTCTAAACAGACTNNGATCGGAAGAGCACACGTCTGAACTCCAGTCAC	rs10883987	A
TCCCTACACGACGCTCTTCCGATCTNNAATTTGCAGTAAAGGAGCCAGCCAAAACCCACCAAAACCANNGATCGGAAGAGCACACGTCTGAACTCCAGTCAC	rs664843	A
TCCCTACACGACGCTCTTCCGATCTNNTAAAAGTATAATGCTTTGGAATGCTGAATACTTTGAATTANNGATCGGAAGAGCACACGTCTGAACTCCAGTCAC	rs590610	A
TCCCTACACGACGCTCTTCCGATCTNNAAAAAGAAATGTAAATAATAAATGTTTTTAAAATAAAGGANNGATCGGAAGAGCACACGTCTGAACTCCAGTCAC	rs571918	A
TCCCTACACGACGCTCTTCCGATCTNNTTAAATGAAATTTATTACAAATTTTTATATAAATTTGCAANNGATCGGAAGAGCACACGTCTGAACTCCAGTCAC	rs649254	A
TCCCTACACGACGCTCTTCCGATCTNNCTCATCTGTCATATAGGGTATTTATAGTTCCTACCTAAGGNNGATCGGAAGAGCACACGTCTGAACTCCAGTCAC	rs67035778	A
TCCCTACACGACGCTCTTCCGATCTNNAGCACGGGTCACTTAAGCTAGGGGGGCCCACAGTTTCTCTNNGATCGGAAGAGCACACGTCTGAACTCCAGTCAC	rs1889446	A
TCCCTACACGACGCTCTTCCGATCTNNGCTTTTGTTCTGCTGCTTTATTTGGTTGGATTTTTTAAAANNGATCGGAAGAGCACACGTCTGAACTCCAGTCAC	rs10885543	A
TCCCTACACGACGCTCTTCCGATCTNNAGATACTTACTTCCCTATCACTGCAGTATTTAGGAATTACNNGATCGGAAGAGCACACGTCTGAACTCCAGTCAC	rs10787522	A
TCCCTACACGACGCTCTTCCGATCTNNTGACTCCAGACACTTTATCATTTTTCTTTTTTTTGAGACGNNGATCGGAAGAGCACACGTCTGAACTCCAGTCAC	rs12357853	A
TCCCTACACGACGCTCTTCCGATCTNNCTTCACAGAAGACAACGTCAGGGGCAGGATCACATGCTCCNNGATCGGAAGAGCACACGTCTGAACTCCAGTCAC	rs12572135	A
TCCCTACACGACGCTCTTCCGATCTNNTTCTCACTCACCAAAGACAAGTGACCCATAAGACAGGGCCNNGATCGGAAGAGCACACGTCTGAACTCCAGTCAC	rs3750821	A
TCCCTACACGACGCTCTTCCGATCTNNGAAAAATTCACAGATGCTAATGAAGGACCATCTCTAAAGANNGATCGGAAGAGCACACGTCTGAACTCCAGTCAC	rs1468500	A
TCCCTACACGACGCTCTTCCGATCTNNGACATGAGACTCCAGTCAGACAACCAGAGCTCAAAAAATCNNGATCGGAAGAGCACACGTCTGAACTCCAGTCAC	rs740485	A
TCCCTACACGACGCTCTTCCGATCTNNGACTGAAGGCTGCACTGTCAGCTTCCCTACTTTTGAGGCTNNGATCGGAAGAGCACACGTCTGAACTCCAGTCAC	rs11196687	A
TCCCTACACGACGCTCTTCCGATCTNNGTGTGAGGTCCAGGTACACACGGTCAGATTCTCTCTCATTNNGATCGGAAGAGCACACGTCTGAACTCCAGTCAC	rs2286396	A
TCCCTACACGACGCTCTTCCGATCTNNCAGCAACCACAACAAAAAAACCCTTCTCATTTCATCTTCANNGATCGGAAGAGCACACGTCTGAACTCCAGTCAC	rs1005633	A
TCCCTACACGACGCTCTTCCGATCTNNCTCAGCTTCAGAACCCATCAGACACCTTCCCTGTCCTAAGNNGATCGGAAGAGCACACGTCTGAACTCCAGTCAC	rs1468498	A
TCCCTACACGACGCTCTTCCGATCTNNGACCCCCAATGTGGGACCCACTTGGGGATCAAGATACCAGNNGATCGGAAGAGCACACGTCTGAACTCCAGTCAC	rs4918896	A
TCCCTACACGACGCTCTTCCGATCTNNCTCCTCTTTTCCAAGCAGTATATGTTTCTTCTTCTCTTTTNNGATCGGAAGAGCACACGTCTGAACTCCAGTCAC	rs10749159	A
TCCCTACACGACGCTCTTCCGATCTNNTACAGGCGCCCACCACCACACCTGGCTATTTTTGTATTTTNNGATCGGAAGAGCACACGTCTGAACTCCAGTCAC	rs7922346	A
TCCCTACACGACGCTCTTCCGATCTNNAGGGCAAAGCTGACTACAAAGCAAGACACATCATCCTGAGNNGATCGGAAGAGCACACGTCTGAACTCCAGTCAC	rs57556536	A
TCCCTACACGACGCTCTTCCGATCTNNTAGAGATAAACCCTGTGCTACTGGAGGCAACAGTGATGGCNNGATCGGAAGAGCACACGTCTGAACTCCAGTCAC	rs74536681	A
TCCCTACACGACGCTCTTCCGATCTNNTCTAAGCTGATGTTGATTCAGGGGGACCCAAAACATCATTNNGATCGGAAGAGCACACGTCTGAACTCCAGTCAC	rs75532680	A
TCCCTACACGACGCTCTTCCGATCTNNAGTAGCAAAATTTTTACTTACTGTTTCCACAATGTTATGTNNGATCGGAAGAGCACACGTCTGAACTCCAGTCAC	rs80053394	A
TCCCTACACGACGCTCTTCCGATCTNNAGCATCTCTTCGTATGGGTAGATACCTTCAGTAAGTGGGTNNGATCGGAAGAGCACACGTCTGAACTCCAGTCAC	rs7122295	A
TCCCTACACGACGCTCTTCCGATCTNNCCCTTTCCTTCTCTGTGGTACCCGGCATTAGATTGGGGGTNNGATCGGAAGAGCACACGTCTGAACTCCAGTCAC	rs142903089	A
TCCCTACACGACGCTCTTCCGATCTNNCAATAATCTTCAAAGAATTAATAGGAAAGTCAGTATTTGCNNGATCGGAAGAGCACACGTCTGAACTCCAGTCAC	rs72472134	A
TCCCTACACGACGCTCTTCCGATCTNNTAGGGAAGAAATAATACTTAGATGTGGGCTTACTTTAACTNNGATCGGAAGAGCACACGTCTGAACTCCAGTCAC	rs72472135	A
TCCCTACACGACGCTCTTCCGATCTNNGAAATTCTTACAGCACACAAGTTGGAAACCACTGCAGACTNNGATCGGAAGAGCACACGTCTGAACTCCAGTCAC	rs7929185	A
TCCCTACACGACGCTCTTCCGATCTNNATTCTGGGTCTTTTTTTTTACCAATACAGGGTCTCGCTTANNGATCGGAAGAGCACACGTCTGAACTCCAGTCAC	rs72472136	A
TCCCTACACGACGCTCTTCCGATCTNNTTTAGTAGATCCTGTTGAGACTTCACTCTCCTGAAATGAGNNGATCGGAAGAGCACACGTCTGAACTCCAGTCAC	rs10792230	A
TCCCTACACGACGCTCTTCCGATCTNNCTGTGAATAGTTTAATAGAAAAGTTTTCTTGGTTCTGAAANNGATCGGAAGAGCACACGTCTGAACTCCAGTCAC	rs57417127	A
TCCCTACACGACGCTCTTCCGATCTNNTTTTTCCCAAGGAGTCCCAAGCTTGAATATTCACTTTTAANNGATCGGAAGAGCACACGTCTGAACTCCAGTCAC	rs4372475	A
TCCCTACACGACGCTCTTCCGATCTNNGAGGGACTTCCCCCGACCAAAAAAAAAGAAGTGATTTAGTNNGATCGGAAGAGCACACGTCTGAACTCCAGTCAC	rs77021098	A
TCCCTACACGACGCTCTTCCGATCTNNGCATGTCTTGTCTGTCTTGATAAGTAGCTGTTTTCACTCANNGATCGGAAGAGCACACGTCTGAACTCCAGTCAC	rs72472137	A
TCCCTACACGACGCTCTTCCGATCTNNTATGGGCAAGCATGGAGTCATTGGGAATCATGCATCCAATNNGATCGGAAGAGCACACGTCTGAACTCCAGTCAC	rs72472138	A
TCCCTACACGACGCTCTTCCGATCTNNTTGATTTGCATATGTTAAAACATACTTGTTTATGTTATGTNNGATCGGAAGAGCACACGTCTGAACTCCAGTCAC	rs80145646	A
TCCCTACACGACGCTCTTCCGATCTNNTTGCATATGTTAAACCATAATTGTTTATGTTATGTTTATGNNGATCGGAAGAGCACACGTCTGAACTCCAGTCAC	rs75155142	A
TCCCTACACGACGCTCTTCCGATCTNNAAAAAACTTTACATGAAACATAGGCCTGCAACCCCATCTCNNGATCGGAAGAGCACACGTCTGAACTCCAGTCAC	rs75705964	A
TCCCTACACGACGCTCTTCCGATCTNNGAACAGAGGTCATGACTTGAAAGAAAAAGGTGTCAGAACANNGATCGGAAGAGCACACGTCTGAACTCCAGTCAC	rs72472139	A
TCCCTACACGACGCTCTTCCGATCTNNTTATGAAGTTAGAAATCAGAAGCAAATTGATAGAGAAATANNGATCGGAAGAGCACACGTCTGAACTCCAGTCAC	rs77808248	A
TCCCTACACGACGCTCTTCCGATCTNNTATTAATATTAAATAATGTAAAATCTAATGAGTAATTATGNNGATCGGAAGAGCACACGTCTGAACTCCAGTCAC	rs75560618	A
TCCCTACACGACGCTCTTCCGATCTNNTGGGTAAAAAAAATCCATTAAAAGGCAAGATAGACTAGTGNNGATCGGAAGAGCACACGTCTGAACTCCAGTCAC	rs79901477	A
TCCCTACACGACGCTCTTCCGATCTNNGTAGGATATAAATGACTCCAACATGCAGTGTAAACTAGTTNNGATCGGAAGAGCACACGTCTGAACTCCAGTCAC	rs74761007	A
TCCCTACACGACGCTCTTCCGATCTNNTGGCTTTTATTGCCATTGCATTTGGTGTTGTAGTCATGAANNGATCGGAAGAGCACACGTCTGAACTCCAGTCAC	rs78319122	A
TCCCTACACGACGCTCTTCCGATCTNNAACATTGACAGTGGGGTGTAAAAGTCTCCCATTATTAGTGNNGATCGGAAGAGCACACGTCTGAACTCCAGTCAC	rs146628173	A
TCCCTACACGACGCTCTTCCGATCTNNTTTAAGAATGTTGAATATTAGCCCCCACTCTCTTCTGGCTNNGATCGGAAGAGCACACGTCTGAACTCCAGTCAC	rs192528221	A
TCCCTACACGACGCTCTTCCGATCTNNGCCTCCACCTGTGTCAGTTAACAAGCCTGGCGCTTTGCTTNNGATCGGAAGAGCACACGTCTGAACTCCAGTCAC	rs78317787	A
TCCCTACACGACGCTCTTCCGATCTNNGTCAGTTTACAAGCCTGGCACTTTGCTTGGATCCCCTCTCNNGATCGGAAGAGCACACGTCTGAACTCCAGTCAC	rs76141826	A
TCCCTACACGACGCTCTTCCGATCTNNATTCTAGTTATTGCGGGAAAAGCATCATATATTAACTGATNNGATCGGAAGAGCACACGTCTGAACTCCAGTCAC	rs59794438	A
TCCCTACACGACGCTCTTCCGATCTNNTCTTTGTGGTTTTAATTTGAATTTCCCTGATAATCTGTGANNGATCGGAAGAGCACACGTCTGAACTCCAGTCAC	rs79805226	A
TCCCTACACGACGCTCTTCCGATCTNNTTGATGTGTCTGTTTCCATACTGGTATCATGCTGTTTTGANNGATCGGAAGAGCACACGTCTGAACTCCAGTCAC	rs59932446	A
TCCCTACACGACGCTCTTCCGATCTNNGTTACTTTGGGAGGTATGGACATTTTCACAATATTGATTCNNGATCGGAAGAGCACACGTCTGAACTCCAGTCAC	rs74710293	A
TCCCTACACGACGCTCTTCCGATCTNNCAATGGCATGATCTCAGCTAACTGCAACATCCACCTCCCANNGATCGGAAGAGCACACGTCTGAACTCCAGTCAC	rs144841918	A
TCCCTACACGACGCTCTTCCGATCTNNTTGAAGACTGATGGCCCAAAGATTCTTTTAAGTCCCAAATNNGATCGGAAGAGCACACGTCTGAACTCCAGTCAC	rs76350209	A
TCCCTACACGACGCTCTTCCGATCTNNTTTACTTGTCACTCAGGCTATAGATCAATGGATTCAACCTNNGATCGGAAGAGCACACGTCTGAACTCCAGTCAC	rs76334132	A
TCCCTACACGACGCTCTTCCGATCTNNCAGCAAACAGTGACAGTTTAACTTCCTCTTTACTGATTTGNNGATCGGAAGAGCACACGTCTGAACTCCAGTCAC	rs139127946	A
TCCCTACACGACGCTCTTCCGATCTNNATTGGTACCAATTTTTCTTAGACTATCTGATAGAATTCAGNNGATCGGAAGAGCACACGTCTGAACTCCAGTCAC	rs58568383	A
TCCCTACACGACGCTCTTCCGATCTNNATAGCAGCATGATTTATAAACCTTTGGGTATATACCCAGTNNGATCGGAAGAGCACACGTCTGAACTCCAGTCAC	rs199995631	A
TCCCTACACGACGCTCTTCCGATCTNNTCTAGATCCCTGAGGAATCACCACACTGACTTCCACAATGNNGATCGGAAGAGCACACGTCTGAACTCCAGTCAC	rs200948278	A
TCCCTACACGACGCTCTTCCGATCTNNTTGGTTCCATATGAACTTTAAAGTAGTTTTTTCCAATTCTNNGATCGGAAGAGCACACGTCTGAACTCCAGTCAC	rs138604319	A
TCCCTACACGACGCTCTTCCGATCTNNGCATTCCTTTGGAGGAGGAAAGGTGCTCGGATTTTTAGAGNNGATCGGAAGAGCACACGTCTGAACTCCAGTCAC	rs143523959	A
TCCCTACACGACGCTCTTCCGATCTNNTTGATTTCTTCTGTGAGCTATTAGTTGTTCAGGATCATGTNNGATCGGAAGAGCACACGTCTGAACTCCAGTCAC	rs75567197	A
TCCCTACACGACGCTCTTCCGATCTNNTTGTCAAGACTTGTCTCATAGCCTAACATTTGGTCTATCCNNGATCGGAAGAGCACACGTCTGAACTCCAGTCAC	rs59966846	A
TCCCTACACGACGCTCTTCCGATCTNNGTCCTGTAGGCTGTCTTCCATCTTTTTTTTTTCTTTTTGCNNGATCGGAAGAGCACACGTCTGAACTCCAGTCAC	rs79942061	A
TCCCTACACGACGCTCTTCCGATCTNNATAGTTTATGTAGAGTTTCACCTGAAGATGGGTCCTAGGGNNGATCGGAAGAGCACACGTCTGAACTCCAGTCAC	rs74534178	A
TCCCTACACGACGCTCTTCCGATCTNNTCTGCTATACTGGACTCTGAGTCGCCAAGAGACAGGCACCNNGATCGGAAGAGCACACGTCTGAACTCCAGTCAC	rs76459192	A
TCCCTACACGACGCTCTTCCGATCTNNCTCACAAAGTGTGAGTTATAGAATATAATAGTTCTTATTGNNGATCGGAAGAGCACACGTCTGAACTCCAGTCAC	rs56793872	A
TCCCTACACGACGCTCTTCCGATCTNNCATCAATTATCTTTTCCTAAGCGAATTGTCTCAGGAGATGNNGATCGGAAGAGCACACGTCTGAACTCCAGTCAC	rs77895457	A
TCCCTACACGACGCTCTTCCGATCTNNCTTAGCATTAAGTAACCAAACGTCTCTACTTATAGGTGTGNNGATCGGAAGAGCACACGTCTGAACTCCAGTCAC	rs76221427	A
TCCCTACACGACGCTCTTCCGATCTNNTGAATCACCAGAGGTCTTTATGAAGAAAAACTATTATCTTNNGATCGGAAGAGCACACGTCTGAACTCCAGTCAC	rs77871269	A
TCCCTACACGACGCTCTTCCGATCTNNGTTATACAGCAGTAGTTAAACAATATACTTCATAATTTAANNGATCGGAAGAGCACACGTCTGAACTCCAGTCAC	rs75628321	A
TCCCTACACGACGCTCTTCCGATCTNNAGCTACCAGTAGTGGCATTATACCTCCCTAAGAAGGAGCTNNGATCGGAAGAGCACACGTCTGAACTCCAGTCAC	rs77232851	A
TCCCTACACGACGCTCTTCCGATCTNNAATACAAGAATTCCACAATACAATCAAAAGTATTAAGAGCNNGATCGGAAGAGCACACGTCTGAACTCCAGTCAC	rs74237944	A
TCCCTACACGACGCTCTTCCGATCTNNGAATTCAGAGGAACCTCTAAAGGTCACCACCTTAGGGAAANNGATCGGAAGAGCACACGTCTGAACTCCAGTCAC	rs76247745	A
TCCCTACACGACGCTCTTCCGATCTNNTGGGGGCAGGACATAGCTGAACAAAAGGCAGCAGAAACTTNNGATCGGAAGAGCACACGTCTGAACTCCAGTCAC	rs80034033	A
TCCCTACACGACGCTCTTCCGATCTNNAAAAAAAAAGCCAGGGGCTACAATCCTAGTCTCTGATATANNGATCGGAAGAGCACACGTCTGAACTCCAGTCAC	rs4569028	A
TCCCTACACGACGCTCTTCCGATCTNNGGAGATAGAGACACAAAAAACACTTCAAAAAATTAATGAANNGATCGGAAGAGCACACGTCTGAACTCCAGTCAC	rs201814803	A
TCCCTACACGACGCTCTTCCGATCTNNCAGAATCTACAATGAACTCAAACAAATTTACAAGAAAAAANNGATCGGAAGAGCACACGTCTGAACTCCAGTCAC	rs10792233	A
TCCCTACACGACGCTCTTCCGATCTNNAAAATGATTTTCTGATTTCATTGTATTGATTTTCAGATTTNNGATCGGAAGAGCACACGTCTGAACTCCAGTCAC	rs61001950	A
TCCCTACACGACGCTCTTCCGATCTNNCCCACCCCACAACAGGTCCAGGTGTGTGATGTTCCCCTTCNNGATCGGAAGAGCACACGTCTGAACTCCAGTCAC	rs180953596	A
TCCCTACACGACGCTCTTCCGATCTNNTTCTCCACATCCTCTCCGGAACCTGTGGTTTCCTGACTTTNNGATCGGAAGAGCACACGTCTGAACTCCAGTCAC	rs76418747	A
TCCCTACACGACGCTCTTCCGATCTNNTGGATAAGGAAGGAATAATAGTAATAATAAAAGCAATAATNNGATCGGAAGAGCACACGTCTGAACTCCAGTCAC	rs12274840	A
TCCCTACACGACGCTCTTCCGATCTNNAGCAATAATAAAGAAAAAAAACAGATTGATCATAAATGGANNGATCGGAAGAGCACACGTCTGAACTCCAGTCAC	rs1941023	A
TCCCTACACGACGCTCTTCCGATCTNNAGAAATCTGCCTTTTCTCCAGGAGCTGTCGTGACAATCAANNGATCGGAAGAGCACACGTCTGAACTCCAGTCAC	rs1941024	A
TCCCTACACGACGCTCTTCCGATCTNNAAATTTGGAAGACATTGCCATATTCTCTGAGAGAGGAGATNNGATCGGAAGAGCACACGTCTGAACTCCAGTCAC	rs11230348	A
TCCCTACACGACGCTCTTCCGATCTNNAGGAGCGTCTCTGACCGGCAGCCCCGTCTGAGAAGTGAGGNNGATCGGAAGAGCACACGTCTGAACTCCAGTCAC	rs146613330	A
TCCCTACACGACGCTCTTCCGATCTNNGAGAAGTGAGGAGCCCCTCAGCCCAGCAGCCACCCCATCTNNGATCGGAAGAGCACACGTCTGAACTCCAGTCAC	rs192435123	A
TCCCTACACGACGCTCTTCCGATCTNNAGCCGCCCCGTCCGGAGGTAGGGGGCAACCCCCGCCCGGTNNGATCGGAAGAGCACACGTCTGAACTCCAGTCAC	rs75292430	A
TCCCTACACGACGCTCTTCCGATCTNNGGGGGCAACCCCCGCCCGGACAGCCGCCCTGTCTGGGAGGNNGATCGGAAGAGCACACGTCTGAACTCCAGTCAC	rs61900767	A
TCCCTACACGACGCTCTTCCGATCTNNAGAGGCTGGGCTTTTTTTTATTGTTTTTTTTTCCTTTGATNNGATCGGAAGAGCACACGTCTGAACTCCAGTCAC	rs12222967	A
TCCCTACACGACGCTCTTCCGATCTNNATTAAATAGCTTTCTGTTTAAGTTTATATGAAAATAAAATNNGATCGGAAGAGCACACGTCTGAACTCCAGTCAC	rs10897077	A
TCCCTACACGACGCTCTTCCGATCTNNTGATGCACTGGGTCACAAGAGTCAAAGCACTACCTTAAAANNGATCGGAAGAGCACACGTCTGAACTCCAGTCAC	rs4939392	A
TCCCTACACGACGCTCTTCCGATCTNNTTTCCAGAATGGCTGATTGAGGACATGGTAACTCTCCCTANNGATCGGAAGAGCACACGTCTGAACTCCAGTCAC	rs2186919	A
TCCCTACACGACGCTCTTCCGATCTNNATGGATCTTACAAATAAAAAGTTGAGTATAAAAACTCAAANNGATCGGAAGAGCACACGTCTGAACTCCAGTCAC	rs10897085	A
TCCCTACACGACGCTCTTCCGATCTNNTTTTGAATAGAAGACTTTAAGTTATTAGAAATGTGGGAGANNGATCGGAAGAGCACACGTCTGAACTCCAGTCAC	rs10501386	A
TCCCTACACGACGCTCTTCCGATCTNNCAAATTGTCCCTGTTTGCAAATGACATGATTGTATATTTANNGATCGGAAGAGCACACGTCTGAACTCCAGTCAC	rs9667664	A
TCCCTACACGACGCTCTTCCGATCTNNATTGTCCCTGTTTGCAGATAACATGATTGTATATTTAGAANNGATCGGAAGAGCACACGTCTGAACTCCAGTCAC	rs9667666	A
TCCCTACACGACGCTCTTCCGATCTNNGGCGTGAGCCATCGCGCCCAGCCTATTCATTACTTTTATANNGATCGGAAGAGCACACGTCTGAACTCCAGTCAC	rs75862770	A
TCCCTACACGACGCTCTTCCGATCTNNGTGCCCAGCCAAGGGGAGAACGTACAGGAGCTTCTGGCCCNNGATCGGAAGAGCACACGTCTGAACTCCAGTCAC	rs79379713	A
TCCCTACACGACGCTCTTCCGATCTNNGAGACCCCATAAATATGGTAAACCTTGTTTCTCCTAGGCTNNGATCGGAAGAGCACACGTCTGAACTCCAGTCAC	rs583642	A
TCCCTACACGACGCTCTTCCGATCTNNAAAAACTGCAGAACCTGCCACCTCCACCCCTGGTGGACAANNGATCGGAAGAGCACACGTCTGAACTCCAGTCAC	rs640046	A
TCCCTACACGACGCTCTTCCGATCTNNCACTCCAGTGACATCTGGCAGAATAGAGTCCCAGGGAAAANNGATCGGAAGAGCACACGTCTGAACTCCAGTCAC	rs654484	A
TCCCTACACGACGCTCTTCCGATCTNNTTAGCCTTCCAGAGCCCTGAACTGGGAGCGGCGGAGTGGGNNGATCGGAAGAGCACACGTCTGAACTCCAGTCAC	rs601986	A
TCCCTACACGACGCTCTTCCGATCTNNAGAGATTTGCTGTGGTCCAACTCTAGGGAGCTCTCTGAGGNNGATCGGAAGAGCACACGTCTGAACTCCAGTCAC	rs667789	A
TCCCTACACGACGCTCTTCCGATCTNNGGGTACAATACTGGGTCAGATCGGGCTTTGCTTGTAGAAANNGATCGGAAGAGCACACGTCTGAACTCCAGTCAC	rs531894	A
TCCCTACACGACGCTCTTCCGATCTNNCTGCCTCTGCCCCTTGGGCAAGTCATCGAAACCCCTCAGANNGATCGGAAGAGCACACGTCTGAACTCCAGTCAC	rs584577	A
TCCCTACACGACGCTCTTCCGATCTNNCAAACAGGACTGGGATATTAACTTCCTTATGGTCCTTACTNNGATCGGAAGAGCACACGTCTGAACTCCAGTCAC	rs631647	A
TCCCTACACGACGCTCTTCCGATCTNNTATCCCAGATAGGAAATAAAGAAGTTCGGAACTAAGTGATNNGATCGGAAGAGCACACGTCTGAACTCCAGTCAC	rs672149	A
TCCCTACACGACGCTCTTCCGATCTNNCAGGGTATAAAATTTGAGAATGCTTGGCTCATGGGCTAGANNGATCGGAAGAGCACACGTCTGAACTCCAGTCAC	rs640060	A
TCCCTACACGACGCTCTTCCGATCTNNATCTGGCTACTAGTAAATTAAAAATTATGTAGCTCGGCCANNGATCGGAAGAGCACACGTCTGAACTCCAGTCAC	rs561079	A
TCCCTACACGACGCTCTTCCGATCTNNATGGTGAAACCCTGTCTCTACTGAAAATACAAAATTAGCCNNGATCGGAAGAGCACACGTCTGAACTCCAGTCAC	rs626655	A
TCCCTACACGACGCTCTTCCGATCTNNCTGGGCCATGGTGGTCTGGACTGTTCTGTGATTCACAGTGNNGATCGGAAGAGCACACGTCTGAACTCCAGTCAC	rs564692	A
TCCCTACACGACGCTCTTCCGATCTNNGGAATGAAGGAAGTCAAGGAGAGGGAAAATGAACTGAAGANNGATCGGAAGAGCACACGTCTGAACTCCAGTCAC	rs56265831	A
TCCCTACACGACGCTCTTCCGATCTNNGTCAAGTCTCTCTGTTTCCATGAGGCCTGCTCCCCAGCTCNNGATCGGAAGAGCACACGTCTGAACTCCAGTCAC	rs7305998	A
TCCCTACACGACGCTCTTCCGATCTNNCTTTTTCCACCACTAAAAGACTGCAGTGTCCTGCACAGCANNGATCGGAAGAGCACACGTCTGAACTCCAGTCAC	rs941024	A
TCCCTACACGACGCTCTTCCGATCTNNTGGAACTGTAAGTCCAATTAAACTTCTTTTGGTTCCCAGTNNGATCGGAAGAGCACACGTCTGAACTCCAGTCAC	rs2201281	A
TCCCTACACGACGCTCTTCCGATCTNNATGGGAACCCACCTCTTGCATCAGCATGACCTGGATGTGANNGATCGGAAGAGCACACGTCTGAACTCCAGTCAC	rs839101	A
TCCCTACACGACGCTCTTCCGATCTNNATATGTACTCAATACCTGTACCCCCATTGTATCTAGGAAANNGATCGGAAGAGCACACGTCTGAACTCCAGTCAC	rs1689340	A
TCCCTACACGACGCTCTTCCGATCTNNATGATTGATTTTCAAATGTAAGGACATGAGATTTGGAGGGNNGATCGGAAGAGCACACGTCTGAACTCCAGTCAC	rs2201282	A
TCCCTACACGACGCTCTTCCGATCTNNAGCCCAGAGTTGATACTGAAGTCAATATAAAATCTGAAGTNNGATCGGAAGAGCACACGTCTGAACTCCAGTCAC	rs2220782	A
TCCCTACACGACGCTCTTCCGATCTNNGTTGCAGTGAGCTGAGATTACGCACTGCACTCCAGCCTGGNNGATCGGAAGAGCACACGTCTGAACTCCAGTCAC	rs839102	A
TCCCTACACGACGCTCTTCCGATCTNNATCAACCATTTTATTAGGTAATATGTATCACAAATCATAANNGATCGGAAGAGCACACGTCTGAACTCCAGTCAC	rs863392	A
TCCCTACACGACGCTCTTCCGATCTNNATATAAATAAGTTTATAAAAAATGCCTTTAAGTCAATCATNNGATCGGAAGAGCACACGTCTGAACTCCAGTCAC	rs839103	A
TCCCTACACGACGCTCTTCCGATCTNNTGAATGACACTGAAGAACAATGTATTTTTAAAAAATTTTTNNGATCGGAAGAGCACACGTCTGAACTCCAGTCAC	rs865138	A
TCCCTACACGACGCTCTTCCGATCTNNATAATTAAAGTGTGTTTCTACTGTTAATTGCAATATTCAANNGATCGGAAGAGCACACGTCTGAACTCCAGTCAC	rs6538022	A
TCCCTACACGACGCTCTTCCGATCTNNGTGACGTGGCAAGAAAACTACGTGAAATGTCTCCATTGAANNGATCGGAAGAGCACACGTCTGAACTCCAGTCAC	rs6538023	A
TCCCTACACGACGCTCTTCCGATCTNNACGTGGCAAGAAAACTACGAGAAATGTCTCCATTGAATGCNNGATCGGAAGAGCACACGTCTGAACTCCAGTCAC	rs6538024	A
TCCCTACACGACGCTCTTCCGATCTNNAATTAAATGAACTTTGAGAAGCCTTGCAAGACTTTACTAANNGATCGGAAGAGCACACGTCTGAACTCCAGTCAC	rs2452814	A
TCCCTACACGACGCTCTTCCGATCTNNCATGAAGAGTTGCACTATAATCCAAAAGAACCACATGATTNNGATCGGAAGAGCACACGTCTGAACTCCAGTCAC	rs839166	A
TCCCTACACGACGCTCTTCCGATCTNNATATGTTGGTATGTTCAAAATTAGCATTCTAAGCTTTTCCNNGATCGGAAGAGCACACGTCTGAACTCCAGTCAC	rs839165	A
TCCCTACACGACGCTCTTCCGATCTNNTGCTTTAGGTACATAGTTCATTTTAACTTTGAGCTTTCTTNNGATCGGAAGAGCACACGTCTGAACTCCAGTCAC	rs839164	A
TCCCTACACGACGCTCTTCCGATCTNNTGAAACTGGCAAACCTCCAATCAGCTTCTTAGCATTTTGGNNGATCGGAAGAGCACACGTCTGAACTCCAGTCAC	rs839163	A
TCCCTACACGACGCTCTTCCGATCTNNAGAAATATATAAACATACAAATGTATCAGTCTGCATATTTNNGATCGGAAGAGCACACGTCTGAACTCCAGTCAC	rs865721	A
TCCCTACACGACGCTCTTCCGATCTNNATGTGATGGGAGTAGCAACAGTGCTGCTCTCTGAATCACTNNGATCGGAAGAGCACACGTCTGAACTCCAGTCAC	rs839162	A
TCCCTACACGACGCTCTTCCGATCTNNGGCATCACATATGGCTCACACTAGACTCAGATAGCTGTGTNNGATCGGAAGAGCACACGTCTGAACTCCAGTCAC	rs7956812	A
TCCCTACACGACGCTCTTCCGATCTNNGGCAGAGACAAAAAGGAAGAATCCAGGGTAATGCAGGATTNNGATCGGAAGAGCACACGTCTGAACTCCAGTCAC	rs863395	A
TCCCTACACGACGCTCTTCCGATCTNNAATTAACAAAATATTTTAAAAATTTCTTCCTAATTGAAGGNNGATCGGAAGAGCACACGTCTGAACTCCAGTCAC	rs839160	A
TCCCTACACGACGCTCTTCCGATCTNNTAAGTGTATATTAAGATGAATTTTGACACATGAATGCACANNGATCGGAAGAGCACACGTCTGAACTCCAGTCAC	rs839159	A
TCCCTACACGACGCTCTTCCGATCTNNAATTGTGGTGGCACTTTGAAGTTTGACTTCTAACCTCCAGNNGATCGGAAGAGCACACGTCTGAACTCCAGTCAC	rs863394	A
TCCCTACACGACGCTCTTCCGATCTNNCATGTATGCATGACCCATGAGAAAATATTTTTTATATGATNNGATCGGAAGAGCACACGTCTGAACTCCAGTCAC	rs844432	A
TCCCTACACGACGCTCTTCCGATCTNNTTAGTCCATTTGTAACAAAATGGTTGTTGGGATTTTTTATNNGATCGGAAGAGCACACGTCTGAACTCCAGTCAC	rs839158	A
TCCCTACACGACGCTCTTCCGATCTNNACAAACATTCTAACAATATATAATCTTCCAATCCATGAAANNGATCGGAAGAGCACACGTCTGAACTCCAGTCAC	rs839157	A
TCCCTACACGACGCTCTTCCGATCTNNTTTATTGTTTTTATGCCACAGCAAATGGTATTGTGCTTCANNGATCGGAAGAGCACACGTCTGAACTCCAGTCAC	rs839156	A
TCCCTACACGACGCTCTTCCGATCTNNTCAAATCTTAGTAAGAAAGAATCAATATTCTGCCATTACANNGATCGGAAGAGCACACGTCTGAACTCCAGTCAC	rs839155	A
TCCCTACACGACGCTCTTCCGATCTNNTTCTAGATGTATAGGTTGAAATTTTTCACCAGTTTGACAANNGATCGGAAGAGCACACGTCTGAACTCCAGTCAC	rs839154	A
TCCCTACACGACGCTCTTCCGATCTNNTTTTGTTTAGCTTTAGTTAAGATGTCTTTATTTTTGTTAANNGATCGGAAGAGCACACGTCTGAACTCCAGTCAC	rs839153	A
TCCCTACACGACGCTCTTCCGATCTNNGATGTCTTTATTTTTGTTAACTTCTTAATTCAACGGTTATNNGATCGGAAGAGCACACGTCTGAACTCCAGTCAC	rs839152	A
TCCCTACACGACGCTCTTCCGATCTNNTGTTAACTTCTTAATTCAAAGGTTATATTCTGATTCAAAGNNGATCGGAAGAGCACACGTCTGAACTCCAGTCAC	rs839151	A
TCCCTACACGACGCTCTTCCGATCTNNTACTGTATGACCTCTTATAATTTCCAGTCGGATCTGAGCTNNGATCGGAAGAGCACACGTCTGAACTCCAGTCAC	rs1628799	A
TCCCTACACGACGCTCTTCCGATCTNNGTGGGTCCCTACAGGAAAGATGTGTAAATGTTTCTACCATNNGATCGGAAGAGCACACGTCTGAACTCCAGTCAC	rs839150	A
TCCCTACACGACGCTCTTCCGATCTNNACCCAAAAACATACAGATAAACAGTTTTTCAAAGAAAACANNGATCGGAAGAGCACACGTCTGAACTCCAGTCAC	rs839149	A
TCCCTACACGACGCTCTTCCGATCTNNAACATTATGAAATCTTGAGATAGTAGAAATGAAGTATGATNNGATCGGAAGAGCACACGTCTGAACTCCAGTCAC	rs839148	A
TCCCTACACGACGCTCTTCCGATCTNNTTTACCTAATTTATAATAAATATGGCATATTAAGTACATTNNGATCGGAAGAGCACACGTCTGAACTCCAGTCAC	rs839172	A
TCCCTACACGACGCTCTTCCGATCTNNGACTTCCATAAGAATCAGGAAATTATTTACTTTGACCTAANNGATCGGAAGAGCACACGTCTGAACTCCAGTCAC	rs844436	A
TCCCTACACGACGCTCTTCCGATCTNNCATAAGAATCAGGAAATTAATTACTTTGACCTAAATTAATNNGATCGGAAGAGCACACGTCTGAACTCCAGTCAC	rs860813	A
TCCCTACACGACGCTCTTCCGATCTNNAGTTTCTGACATTTGTGTAACAATATTTTTAAAGTTAGTCNNGATCGGAAGAGCACACGTCTGAACTCCAGTCAC	rs844435	A
TCCCTACACGACGCTCTTCCGATCTNNATGTAATTAATGACAACTAAAAGTAAGCTAAGACAGGCTGNNGATCGGAAGAGCACACGTCTGAACTCCAGTCAC	rs6538025	A
TCCCTACACGACGCTCTTCCGATCTNNCCTACTGATTTTTTTTGTTATCCTGTATTCCTTTCACTTTNNGATCGGAAGAGCACACGTCTGAACTCCAGTCAC	rs6538026	A
TCCCTACACGACGCTCTTCCGATCTNNAACTGAAGAATAAACAAGAAGATCACTTCACCTCAGTTTCNNGATCGGAAGAGCACACGTCTGAACTCCAGTCAC	rs839171	A
TCCCTACACGACGCTCTTCCGATCTNNAAAAGAGGGAAAGAAGAAAACATTAAACAGAACCTATGTTNNGATCGGAAGAGCACACGTCTGAACTCCAGTCAC	rs839170	A
TCCCTACACGACGCTCTTCCGATCTNNCTAGGTCTCTGACCTCCCTATCATCCCAACCCTTATAGAANNGATCGGAAGAGCACACGTCTGAACTCCAGTCAC	rs844434	A
TCCCTACACGACGCTCTTCCGATCTNNTTTTACACACAGATAAATAAGCTTAAGATACATATAGTAGNNGATCGGAAGAGCACACGTCTGAACTCCAGTCAC	rs839168	A
TCCCTACACGACGCTCTTCCGATCTNNGAAATCAAATCCCATCACAACTTTACTTTAAACTGCTTCCNNGATCGGAAGAGCACACGTCTGAACTCCAGTCAC	rs79010858	A
TCCCTACACGACGCTCTTCCGATCTNNTGGGTCATTCTCTGCTCAGATCAAAGCATCAGAGATACTTNNGATCGGAAGAGCACACGTCTGAACTCCAGTCAC	rs709812	A
TCCCTACACGACGCTCTTCCGATCTNNAAAGTTACATTGCATCATAACAGTTTCTTGTAGATTCAATNNGATCGGAAGAGCACACGTCTGAACTCCAGTCAC	rs839104	A
TCCCTACACGACGCTCTTCCGATCTNNCCCCACACATAGCAAACTGAAACTTAATTTAGTATGTAAANNGATCGGAAGAGCACACGTCTGAACTCCAGTCAC	rs839105	A
TCCCTACACGACGCTCTTCCGATCTNNATGAGGTGACTGTTCTAAAACTAAAATTGTTCATAACCTANNGATCGGAAGAGCACACGTCTGAACTCCAGTCAC	rs75659209	A
TCCCTACACGACGCTCTTCCGATCTNNGACAAAGAAGGTCACTATAAATAATGATAAAGAGATCAATNNGATCGGAAGAGCACACGTCTGAACTCCAGTCAC	rs1698787	A
TCCCTACACGACGCTCTTCCGATCTNNTCATCAGAGAGTATTAGGAACAACTGTTATATGCTAACAANNGATCGGAAGAGCACACGTCTGAACTCCAGTCAC	rs1689357	A
TCCCTACACGACGCTCTTCCGATCTNNCATGATAAAGTGTGATATAATTCACAGATACAAGGGTGGTNNGATCGGAAGAGCACACGTCTGAACTCCAGTCAC	rs74570836	A
TCCCTACACGACGCTCTTCCGATCTNNGAACTTCTTTGGACCCTGCAACCCACTCCTACTAGTGCTCNNGATCGGAAGAGCACACGTCTGAACTCCAGTCAC	rs1602848	A
TCCCTACACGACGCTCTTCCGATCTNNGGCTGACATATCCAGGGGTATTTAAAAATTTTTTCCAGACNNGATCGGAAGAGCACACGTCTGAACTCCAGTCAC	rs2471560	A
TCCCTACACGACGCTCTTCCGATCTNNCTTCAGCACACGTATAAAAAACATTTTCATATTTAGGTTCNNGATCGGAAGAGCACACGTCTGAACTCCAGTCAC	rs1994863	A
TCCCTACACGACGCTCTTCCGATCTNNTCCCCCAGTATTTTCTATGAAAGAGAAATAAGGATTTGCANNGATCGGAAGAGCACACGTCTGAACTCCAGTCAC	rs10776953	A
TCCCTACACGACGCTCTTCCGATCTNNGGTGGTTATCACTTGTTACAAAGTAGTTGTTTTCCTCTATNNGATCGGAAGAGCACACGTCTGAACTCCAGTCAC	rs2471561	A
TCCCTACACGACGCTCTTCCGATCTNNAAATAAATTGCACTTTCATATGTTTATATGGGAAAGGAAANNGATCGGAAGAGCACACGTCTGAACTCCAGTCAC	rs2471562	A
TCCCTACACGACGCTCTTCCGATCTNNTTACTTTTTTCCTAATTTAAGTGCCAAACGGGAAAAGTAANNGATCGGAAGAGCACACGTCTGAACTCCAGTCAC	rs2471563	A
TCCCTACACGACGCTCTTCCGATCTNNTTGTCTCCTTACTTGGGCTATCTTGCTTCATTCTGTCTCTNNGATCGGAAGAGCACACGTCTGAACTCCAGTCAC	rs1493408	A
TCCCTACACGACGCTCTTCCGATCTNNAGGAAAGGTACAGTCTAATATAACAATTTAAAGGTAGAGCNNGATCGGAAGAGCACACGTCTGAACTCCAGTCAC	rs2250915	A
TCCCTACACGACGCTCTTCCGATCTNNACAGTGTGAATAAAAGTTCAGGATATAGATAACCTACTTANNGATCGGAAGAGCACACGTCTGAACTCCAGTCAC	rs1493421	A
TCCCTACACGACGCTCTTCCGATCTNNAATTTAAGAAGCCACAGCCATCTCTCTCTCTCTCTCTGTCNNGATCGGAAGAGCACACGTCTGAACTCCAGTCAC	rs2452802	A
TCCCTACACGACGCTCTTCCGATCTNNCTATACAATCACACTGCCCAGTTGCCTCCCTTTGCTGGGGNNGATCGGAAGAGCACACGTCTGAACTCCAGTCAC	rs1493420	A
TCCCTACACGACGCTCTTCCGATCTNNAGCTCCCTATGGGCTCTAAAGGCTCTTCAGAACTTTCAGCNNGATCGGAAGAGCACACGTCTGAACTCCAGTCAC	rs1493419	A
TCCCTACACGACGCTCTTCCGATCTNNGCCTCCTTTTTTGAACTTCATTATATTTTGGCCCCATGGGNNGATCGGAAGAGCACACGTCTGAACTCCAGTCAC	rs1542780	A
TCCCTACACGACGCTCTTCCGATCTNNATTGACCCAAATGTTAGGAAATACCCTTGAGAGTTTTATGNNGATCGGAAGAGCACACGTCTGAACTCCAGTCAC	rs2452807	A
TCCCTACACGACGCTCTTCCGATCTNNACTGGTTACATAAGTCAGAAAAAGAACATATGTATTTAAANNGATCGGAAGAGCACACGTCTGAACTCCAGTCAC	rs2471568	A
TCCCTACACGACGCTCTTCCGATCTNNGTAATGTTGAGCTCCTGGGAGATCACAAACTGAAAATACTNNGATCGGAAGAGCACACGTCTGAACTCCAGTCAC	rs1493415	A
TCCCTACACGACGCTCTTCCGATCTNNAATTTTGTAATTACTTTGCATTGATTTTACAGTACTAGCCNNGATCGGAAGAGCACACGTCTGAACTCCAGTCAC	rs2471569	A
TCCCTACACGACGCTCTTCCGATCTNNGAAAACAATCAAATGCGTTAATTTTAAAGACACATGGAAGNNGATCGGAAGAGCACACGTCTGAACTCCAGTCAC	rs2465143	A
TCCCTACACGACGCTCTTCCGATCTNNTCTTATTTGTTTTGCATTTATTTGGGTGACAGAATGCCACNNGATCGGAAGAGCACACGTCTGAACTCCAGTCAC	rs2465144	A
TCCCTACACGACGCTCTTCCGATCTNNAATTTCATAAAGGAATAATAACAAACACTGCATTTGAGAANNGATCGGAAGAGCACACGTCTGAACTCCAGTCAC	rs1948448	A
TCCCTACACGACGCTCTTCCGATCTNNAAAGCAGACATTCTGTCTGATTTTGCTTACTCTCTTAGGCNNGATCGGAAGAGCACACGTCTGAACTCCAGTCAC	rs2471570	A
TCCCTACACGACGCTCTTCCGATCTNNAATCATCTATTGATGACACATAAGTTGATTCAATGTCTTTNNGATCGGAAGAGCACACGTCTGAACTCCAGTCAC	rs2465147	A
TCCCTACACGACGCTCTTCCGATCTNNTGTTAAGCAATCAGTACAAAGCCCAGCTGTTGTAGTTGGANNGATCGGAAGAGCACACGTCTGAACTCCAGTCAC	rs7312237	A
TCCCTACACGACGCTCTTCCGATCTNNCCATCACCTCAAGTAATTTACCCTTTATGTTACAAACAATNNGATCGGAAGAGCACACGTCTGAACTCCAGTCAC	rs6538028	A
TCCCTACACGACGCTCTTCCGATCTNNGTTGTACTAATTTACATTCATATCAACAGCGTATGAGAGTNNGATCGGAAGAGCACACGTCTGAACTCCAGTCAC	rs10776955	A
TCCCTACACGACGCTCTTCCGATCTNNTGGAGTTTTGATCTTGTTGACCAGGCTGCAGTTCATGACANNGATCGGAAGAGCACACGTCTGAACTCCAGTCAC	rs7308710	A
TCCCTACACGACGCTCTTCCGATCTNNTTCTCCTGCCTCGGCCCCTAAAATAGCTGGGATTACAGGTNNGATCGGAAGAGCACACGTCTGAACTCCAGTCAC	rs6538029	A
TCCCTACACGACGCTCTTCCGATCTNNGTGCTGGGATTACAGGCGTAAGCCACCATGCCCATCTTTGNNGATCGGAAGAGCACACGTCTGAACTCCAGTCAC	rs7973943	A
TCCCTACACGACGCTCTTCCGATCTNNTTGTTTATCAGTTCTAGTAATTTCTTGGTGGAGTCCTTAGNNGATCGGAAGAGCACACGTCTGAACTCCAGTCAC	rs7973773	A
TCCCTACACGACGCTCTTCCGATCTNNCTATTTTTTGGAATAGTTTAAATAGGATTGATATTAGGTCNNGATCGGAAGAGCACACGTCTGAACTCCAGTCAC	rs10858408	A
TCCCTACACGACGCTCTTCCGATCTNNCTCTCTTTTTCTTAGTCTAACAACTTTGCTTACCTTTTCGNNGATCGGAAGAGCACACGTCTGAACTCCAGTCAC	rs7964553	A
TCCCTACACGACGCTCTTCCGATCTNNTTAGCTCTAATAATATTTGATTCATATATCTACGTTCTCCNNGATCGGAAGAGCACACGTCTGAACTCCAGTCAC	rs7953196	A
TCCCTACACGACGCTCTTCCGATCTNNACTTTGTTTTCTTTTACTAAGAATTTCACTTTTGCTGACTNNGATCGGAAGAGCACACGTCTGAACTCCAGTCAC	rs4842601	A
TCCCTACACGACGCTCTTCCGATCTNNTGCATACATTTTTGTTATTACCTTTTCTGTTGTTTATTGGNNGATCGGAAGAGCACACGTCTGAACTCCAGTCAC	rs10745407	A
TCCCTACACGACGCTCTTCCGATCTNNATAACCCATTATGCCGGATATTTTTTGTATAAACTCCAACNNGATCGGAAGAGCACACGTCTGAACTCCAGTCAC	rs2406128	A
TCCCTACACGACGCTCTTCCGATCTNNCTTTTTAAATTTTACTTTGATCAGTATTTGATGTGATTCTNNGATCGGAAGAGCACACGTCTGAACTCCAGTCAC	rs2406127	A
TCCCTACACGACGCTCTTCCGATCTNNGTTTCTTTTTGTTAATTTAATGTGTTTATATTTTTCTCTANNGATCGGAAGAGCACACGTCTGAACTCCAGTCAC	rs2406126	A
TCCCTACACGACGCTCTTCCGATCTNNATTGAAACAGCTAATCCTGATATACCAGTCATAGGTATTTNNGATCGGAAGAGCACACGTCTGAACTCCAGTCAC	rs2406125	A
TCCCTACACGACGCTCTTCCGATCTNNTTCTCCATATATCTAGTAAATATTTATTACATATTGTGGANNGATCGGAAGAGCACACGTCTGAACTCCAGTCAC	rs2406124	A
TCCCTACACGACGCTCTTCCGATCTNNACTCTCATTTCTGCCTCCTAAGAACAATGAGAGCACTATGNNGATCGGAAGAGCACACGTCTGAACTCCAGTCAC	rs10745408	A
TCCCTACACGACGCTCTTCCGATCTNNGGCCTGTTAAGAGAGCTTAAAGTACCATATTCAATGTTCCNNGATCGGAAGAGCACACGTCTGAACTCCAGTCAC	rs2406123	A
TCCCTACACGACGCTCTTCCGATCTNNGTGTATCCAGTGTGTAGCAATGTGCTTTGCTTGTAATAAANNGATCGGAAGAGCACACGTCTGAACTCCAGTCAC	rs2406122	A
TCCCTACACGACGCTCTTCCGATCTNNATTCTTGTATCCTTTTCTTATCCTTTAAAATATCACCAGGNNGATCGGAAGAGCACACGTCTGAACTCCAGTCAC	rs7135177	A
TCCCTACACGACGCTCTTCCGATCTNNTTTAAATTTTATTTTAGGTACAGGGGAACATGTGCAGGTGNNGATCGGAAGAGCACACGTCTGAACTCCAGTCAC	rs7135733	A
TCCCTACACGACGCTCTTCCGATCTNNCAGGGGAACATGTGCAGGTATGCTATATTGGTAAATTGTGNNGATCGGAAGAGCACACGTCTGAACTCCAGTCAC	rs7135741	A
TCCCTACACGACGCTCTTCCGATCTNNTTCTTTTCTGTGGGTGCATAGTATTCCATGATTTATAAGTNNGATCGGAAGAGCACACGTCTGAACTCCAGTCAC	rs2406121	A
TCCCTACACGACGCTCTTCCGATCTNNTGTCTTCTTTTGAGAAGTGACTGTTCATATCCTTTGCCCANNGATCGGAAGAGCACACGTCTGAACTCCAGTCAC	rs7963957	A
TCCCTACACGACGCTCTTCCGATCTNNTTTGTACCAATACCAAGCTATTTTGGTTACTGTTGCCTTGNNGATCGGAAGAGCACACGTCTGAACTCCAGTCAC	rs2406119	A
TCCCTACACGACGCTCTTCCGATCTNNTATCCTGAGACTTTGCTAAAGTGTTATTTTGCTTTACTATNNGATCGGAAGAGCACACGTCTGAACTCCAGTCAC	rs7303642	A
TCCCTACACGACGCTCTTCCGATCTNNTGTCACCCATGCTGGAGTGAAGTGGTGCGATCTCTGCTCANNGATCGGAAGAGCACACGTCTGAACTCCAGTCAC	rs11103912	A
TCCCTACACGACGCTCTTCCGATCTNNACTTTTTAGATAAAAGCTAAGCAGGAGAGCAGCAGCACAANNGATCGGAAGAGCACACGTCTGAACTCCAGTCAC	rs2406118	A
TCCCTACACGACGCTCTTCCGATCTNNACGCAGGAGAGCAGCAGCAAAATCAGTAATATCCCAATTCNNGATCGGAAGAGCACACGTCTGAACTCCAGTCAC	rs2406117	A
TCCCTACACGACGCTCTTCCGATCTNNGCAAACCACTCAGGAAGGAATTAGCAACAGATGAAGTTTANNGATCGGAAGAGCACACGTCTGAACTCCAGTCAC	rs2406116	A
TCCCTACACGACGCTCTTCCGATCTNNCTACTCCTTTAACTTACTAAAAAGAGGTTTAAGCTTTTCCNNGATCGGAAGAGCACACGTCTGAACTCCAGTCAC	rs4503614	A
TCCCTACACGACGCTCTTCCGATCTNNATAGGAACTCAGGATTTTAATTTTTTTGACAACTGAAAAANNGATCGGAAGAGCACACGTCTGAACTCCAGTCAC	rs7134946	A
TCCCTACACGACGCTCTTCCGATCTNNTTTAACAATATTTGTCACAAAAATCTTCTTCAATAATTCCNNGATCGGAAGAGCACACGTCTGAACTCCAGTCAC	rs10776957	A
TCCCTACACGACGCTCTTCCGATCTNNAAAGCACAAAATGGTCCTAAAATAATAATGCCTTTGCTTANNGATCGGAAGAGCACACGTCTGAACTCCAGTCAC	rs4334094	A
TCCCTACACGACGCTCTTCCGATCTNNAGATTAGTTAGATACAGAGATTCGACATACAGGTTCTCCANNGATCGGAAGAGCACACGTCTGAACTCCAGTCAC	rs11103915	A
TCCCTACACGACGCTCTTCCGATCTNNCTAAGGCCCAGCGAGAAATAGAGCGCAGCGCCGGTGGGCTNNGATCGGAAGAGCACACGTCTGAACTCCAGTCAC	rs10776959	A
TCCCTACACGACGCTCTTCCGATCTNNGTCATGAGATGGCAACTTGAATATAGCATTGGAAGTCAGGNNGATCGGAAGAGCACACGTCTGAACTCCAGTCAC	rs6538031	A
TCCCTACACGACGCTCTTCCGATCTNNTGCAATCTTTCTGAAAACCAATTTAATGTTATACATCAGCNNGATCGGAAGAGCACACGTCTGAACTCCAGTCAC	rs6538032	A
TCCCTACACGACGCTCTTCCGATCTNNCTACAAGCGCATGCCACCAAGCCCAGCTATTTTTTTTGTANNGATCGGAAGAGCACACGTCTGAACTCCAGTCAC	rs10858409	A
TCCCTACACGACGCTCTTCCGATCTNNGGCAAACACTCGGTCTTCCATGAACTTTGCATTTGGGATTNNGATCGGAAGAGCACACGTCTGAACTCCAGTCAC	rs10507029	A
TCCCTACACGACGCTCTTCCGATCTNNGCTGGCGAATGACCATGAGATATTAAATCATGACAAAGAANNGATCGGAAGAGCACACGTCTGAACTCCAGTCAC	rs115789286	A
TCCCTACACGACGCTCTTCCGATCTNNAGGGAAAACTGTCAAAACAACAGCGCATAAATCCCCTACTNNGATCGGAAGAGCACACGTCTGAACTCCAGTCAC	rs2242151	A
TCCCTACACGACGCTCTTCCGATCTNNGCCTCATCCTAGAGGGGAGAGCAAGGGAAAGTGTTGGGGGNNGATCGGAAGAGCACACGTCTGAACTCCAGTCAC	rs3847797	A
TCCCTACACGACGCTCTTCCGATCTNNCTCAATAGATTCCAACAGCAATTCCTTTAGAGCAGACACANNGATCGGAAGAGCACACGTCTGAACTCCAGTCAC	rs3847800	A
TCCCTACACGACGCTCTTCCGATCTNNTTCTGTTAGGTTCCATAGCAGGAAAATAGCAGAGGATTTANNGATCGGAAGAGCACACGTCTGAACTCCAGTCAC	rs10745677	A
TCCCTACACGACGCTCTTCCGATCTNNACTGCTGTGGCCTGAATCCATGATTAAAGGAAATGCTAAGNNGATCGGAAGAGCACACGTCTGAACTCCAGTCAC	rs11107420	A
TCCCTACACGACGCTCTTCCGATCTNNGTTGAGAAATGTTGGGGAGAGACTTTCACAGTAGTCAACANNGATCGGAAGAGCACACGTCTGAACTCCAGTCAC	rs10859679	A
TCCCTACACGACGCTCTTCCGATCTNNTCTTTCAGCCCAAACATCGATTGAGCCAAGGTAGCTTTCTNNGATCGGAAGAGCACACGTCTGAACTCCAGTCAC	rs3847803	A
TCCCTACACGACGCTCTTCCGATCTNNCAGCAATATGATACAGACCAGGTTCTCTAACCACATTTCANNGATCGGAAGAGCACACGTCTGAACTCCAGTCAC	rs9737637	A
TCCCTACACGACGCTCTTCCGATCTNNATTCCCCACGGTTTTTGTTATGTTTTGTTTTTGAGACACANNGATCGGAAGAGCACACGTCTGAACTCCAGTCAC	rs6489796	A
TCCCTACACGACGCTCTTCCGATCTNNCCCGGTTTTAGCACAGAAAATCCCTTGTCCAGGAAACCTCNNGATCGGAAGAGCACACGTCTGAACTCCAGTCAC	rs73220281	A
TCCCTACACGACGCTCTTCCGATCTNNCATTTTCAACCAAGTAAAAAGAAATAAAATATATAGATTTNNGATCGGAAGAGCACACGTCTGAACTCCAGTCAC	rs12321716	A
TCCCTACACGACGCTCTTCCGATCTNNAAATGTGCTAAGATGTCAAAATCCAGGTATTAGAATATGTNNGATCGGAAGAGCACACGTCTGAACTCCAGTCAC	rs73220283	A
TCCCTACACGACGCTCTTCCGATCTNNACCTCTGTGCATCTTTGCCAGGCTGTTTCATACTTTTGCTNNGATCGGAAGAGCACACGTCTGAACTCCAGTCAC	rs56036638	A
TCCCTACACGACGCTCTTCCGATCTNNACAAAGGAACCAGAAAATCAAAACTGCTCCAATCGCATCTNNGATCGGAAGAGCACACGTCTGAACTCCAGTCAC	rs1169722	A
TCCCTACACGACGCTCTTCCGATCTNNTGGACCAAGGCTGGCATGGACATCTCTGTTCCTCCCTCTANNGATCGGAAGAGCACACGTCTGAACTCCAGTCAC	rs11065484	A
TCCCTACACGACGCTCTTCCGATCTNNCTTCCGGGCCCTCCTCCGCAATGACGGCGCCGCCAGCAGGNNGATCGGAAGAGCACACGTCTGAACTCCAGTCAC	rs28360466	A
TCCCTACACGACGCTCTTCCGATCTNNCATGCCTGTAATCCCAGCAATTTGGGAGGCCGAGGTCGGTNNGATCGGAAGAGCACACGTCTGAACTCCAGTCAC	rs112778059	A
TCCCTACACGACGCTCTTCCGATCTNNGCAGGCATAGCCTTGTCCCAGTGAGCTCTGGGAATGTCATNNGATCGGAAGAGCACACGTCTGAACTCCAGTCAC	rs55780768	A
TCCCTACACGACGCTCTTCCGATCTNNGTTCCCCAGGGCTTTCCTCATGAGCTTTCACGACGTCTGTNNGATCGGAAGAGCACACGTCTGAACTCCAGTCAC	rs55837222	A
TCCCTACACGACGCTCTTCCGATCTNNTGACCTCAGGTGATCCACCAGCCTCAGCCTCCCAAAGTGCNNGATCGGAAGAGCACACGTCTGAACTCCAGTCAC	rs6489800	A
TCCCTACACGACGCTCTTCCGATCTNNATCTCTTGAACCTGGGAGGAGGAGGTTGCTGAGCTGAGATNNGATCGGAAGAGCACACGTCTGAACTCCAGTCAC	rs11065494	A
TCCCTACACGACGCTCTTCCGATCTNNCACTGCACTCCTGCCTGGGAGACAGAGTGAGAGACAAAGGNNGATCGGAAGAGCACACGTCTGAACTCCAGTCAC	rs11065495	A
TCCCTACACGACGCTCTTCCGATCTNNTTGGGAGGCTGAGGCAGTCAGATCATCTGAGGCCAGGAGTNNGATCGGAAGAGCACACGTCTGAACTCCAGTCAC	rs11065496	A
TCCCTACACGACGCTCTTCCGATCTNNGCTGAGATCGCTCTTCTGCACTCTAGCTTGGGCGACAGAGNNGATCGGAAGAGCACACGTCTGAACTCCAGTCAC	rs11065497	A
TCCCTACACGACGCTCTTCCGATCTNNGTCTCGAACTCCTGACCTCAGGTTATCCACCTGCCTCAGCNNGATCGGAAGAGCACACGTCTGAACTCCAGTCAC	rs12372613	A
TCCCTACACGACGCTCTTCCGATCTNNTTATTTGAGATGGAGTCTCACTCTGTCGCCCAGGCTGGAGNNGATCGGAAGAGCACACGTCTGAACTCCAGTCAC	rs112371853	A
TCCCTACACGACGCTCTTCCGATCTNNGCTACAAGAAGCTGTGTTCATGCAACTGTACTCCAGCCTGNNGATCGGAAGAGCACACGTCTGAACTCCAGTCAC	rs2567992	A
TCCCTACACGACGCTCTTCCGATCTNNCGGGGCCATCCCGGCCCCCAAGACCCCTCCTTGCCCTTTCNNGATCGGAAGAGCACACGTCTGAACTCCAGTCAC	rs58211692	A
TCCCTACACGACGCTCTTCCGATCTNNCGGTGCTTTGGGCTGCACTAGCCTCCCCCTAGTGGTGACGNNGATCGGAAGAGCACACGTCTGAACTCCAGTCAC	rs10849860	A
TCCCTACACGACGCTCTTCCGATCTNNTCATGGCCAACTTGGTGAAACCCCGTCTCTACTAAAAAATNNGATCGGAAGAGCACACGTCTGAACTCCAGTCAC	rs111249465	A
TCCCTACACGACGCTCTTCCGATCTNNGTGAGCCAAGATTGGTGCCACTACACTCCAGCCTGGCAACNNGATCGGAAGAGCACACGTCTGAACTCCAGTCAC	rs112856277	A
TCCCTACACGACGCTCTTCCGATCTNNTGAGCCACCGTGCCCGGCCAGCACCTGCGTTTCTAACCCANNGATCGGAAGAGCACACGTCTGAACTCCAGTCAC	rs7136106	A
TCCCTACACGACGCTCTTCCGATCTNNCACTTCCATTTCCATTTTCACCAAATGTGTGTGAGCTAATNNGATCGGAAGAGCACACGTCTGAACTCCAGTCAC	rs9564824	A
TCCCTACACGACGCTCTTCCGATCTNNGACAGGTAAAGAAGCTCCTATGATGGACCAGTTCCTAGGTNNGATCGGAAGAGCACACGTCTGAACTCCAGTCAC	rs9318019	A
TCCCTACACGACGCTCTTCCGATCTNNCATTTTAGAGTATACGAAGAAAGTTCCAACAGTTGTTTGGNNGATCGGAAGAGCACACGTCTGAACTCCAGTCAC	rs9564825	A
TCCCTACACGACGCTCTTCCGATCTNNCTGTAGTTTCTGCACACAGATGCATTAACAATATCAGCATNNGATCGGAAGAGCACACGTCTGAACTCCAGTCAC	rs9564826	A
TCCCTACACGACGCTCTTCCGATCTNNGCCATCATCTTTTTTTTTTATTTATTTAAATAGCAACCATNNGATCGGAAGAGCACACGTCTGAACTCCAGTCAC	rs200913095	A
TCCCTACACGACGCTCTTCCGATCTNNATTTCCTTCATTAGTGTTAAATGGTTTTCCTTGTAGAGATNNGATCGGAAGAGCACACGTCTGAACTCCAGTCAC	rs9572744	A
TCCCTACACGACGCTCTTCCGATCTNNTTTTTATCATGAAGAGATGATGAATTTTTCAAGTGCTTTTNNGATCGGAAGAGCACACGTCTGAACTCCAGTCAC	rs9529891	A
TCCCTACACGACGCTCTTCCGATCTNNATGGTCTATTTTGGAGAATATTCCATGTGCCAAAACAATGNNGATCGGAAGAGCACACGTCTGAACTCCAGTCAC	rs9572745	A
TCCCTACACGACGCTCTTCCGATCTNNGCTATTAGTCATTTGTCAGATGCATAGTTTGCAACTATTTNNGATCGGAAGAGCACACGTCTGAACTCCAGTCAC	rs9592792	A
TCCCTACACGACGCTCTTCCGATCTNNGTTTCTTTCTCTTTCATGAATGCTCTGCTAGGACTTCCAGNNGATCGGAAGAGCACACGTCTGAACTCCAGTCAC	rs7990526	A
TCCCTACACGACGCTCTTCCGATCTNNTAGGTGATTTTCTTATCTCACCTATTGTAAATAATGCTGANNGATCGGAAGAGCACACGTCTGAACTCCAGTCAC	rs9542697	A
TCCCTACACGACGCTCTTCCGATCTNNTTTTTTTTTCTAGGAGTTTAACGTTTTAGGTTTTATGTTTNNGATCGGAAGAGCACACGTCTGAACTCCAGTCAC	rs1931456	A
TCCCTACACGACGCTCTTCCGATCTNNATTTATTCCTGAATACTTTATTATGCTATTCTAAATGAGANNGATCGGAAGAGCACACGTCTGAACTCCAGTCAC	rs1931454	A
TCCCTACACGACGCTCTTCCGATCTNNCACATATACCTATGTAACAAACCTACATATTCTGTACTTGNNGATCGGAAGAGCACACGTCTGAACTCCAGTCAC	rs1572168	A
TCCCTACACGACGCTCTTCCGATCTNNAAGTAAAATAATAAATAAAAAAATAAATAAATAAATAACCNNGATCGGAAGAGCACACGTCTGAACTCCAGTCAC	rs1572169	A
TCCCTACACGACGCTCTTCCGATCTNNACTTCTTTTAATATTATATATTAATTAACAGATTTTGATCNNGATCGGAAGAGCACACGTCTGAACTCCAGTCAC	rs1572170	A
TCCCTACACGACGCTCTTCCGATCTNNACTTAGTAAACAGAAATTTATTAAACTTTATTCAACTTCANNGATCGGAAGAGCACACGTCTGAACTCCAGTCAC	rs8000025	A
TCCCTACACGACGCTCTTCCGATCTNNTCATGAAAAATATAAATTTAAAAAATAAAGTTAAAATATTNNGATCGGAAGAGCACACGTCTGAACTCCAGTCAC	rs9542701	A
TCCCTACACGACGCTCTTCCGATCTNNTTTTCTACTGTAGCTCTGAAGGCAGCATCCATGCAAGAAANNGATCGGAAGAGCACACGTCTGAACTCCAGTCAC	rs4884950	A
TCCCTACACGACGCTCTTCCGATCTNNTTATCCACAACATCATTACAGAAAGAAAAGAGACGGTGTTNNGATCGGAAGAGCACACGTCTGAACTCCAGTCAC	rs4884951	A
TCCCTACACGACGCTCTTCCGATCTNNATGCCTAGCCATGTTGTACAGGGAGTAGAATTTCCAGCATNNGATCGGAAGAGCACACGTCTGAACTCCAGTCAC	rs74095902	A
TCCCTACACGACGCTCTTCCGATCTNNTTATTAAAAGAATCCCGAGAGAAACGACAAATTGCCTACANNGATCGGAAGAGCACACGTCTGAACTCCAGTCAC	rs9542702	A
TCCCTACACGACGCTCTTCCGATCTNNTATGAAGATGAATTATAGAAATGGAAAACAGATTAGGCATNNGATCGGAAGAGCACACGTCTGAACTCCAGTCAC	rs9572749	A
TCCCTACACGACGCTCTTCCGATCTNNTGCTCTTTAATCTTGCAAAAGTTTGTTTTTATTATATCCCNNGATCGGAAGAGCACACGTCTGAACTCCAGTCAC	rs7490055	A
TCCCTACACGACGCTCTTCCGATCTNNGCTCATTAATCTCTAAATGAAAATGATGCTACCACTACAANNGATCGGAAGAGCACACGTCTGAACTCCAGTCAC	rs9318022	A
TCCCTACACGACGCTCTTCCGATCTNNTACTTACCTTAAAATAACAATTGTGATCATTGATAAGAATNNGATCGGAAGAGCACACGTCTGAACTCCAGTCAC	rs7992487	A
TCCCTACACGACGCTCTTCCGATCTNNAATAAATGAGGATAAGTTCAGCTTTTATATACAAGTCATANNGATCGGAAGAGCACACGTCTGAACTCCAGTCAC	rs4627208	A
TCCCTACACGACGCTCTTCCGATCTNNCACAGTAATTCATATTAGAAATAGAAGCAGTTGCATGTTANNGATCGGAAGAGCACACGTCTGAACTCCAGTCAC	rs7335441	A
TCCCTACACGACGCTCTTCCGATCTNNGGAATGAAAACATGTTACAATTATATATTTTTTTTTATTTNNGATCGGAAGAGCACACGTCTGAACTCCAGTCAC	rs9529895	A
TCCCTACACGACGCTCTTCCGATCTNNGCAAAGTTAGTTGATTTCTATTGAATAACAATTACTTCCTNNGATCGGAAGAGCACACGTCTGAACTCCAGTCAC	rs61957777	A
TCCCTACACGACGCTCTTCCGATCTNNTCTTGTGGGTAAATATTAGATGCATATATTATATTTATGGNNGATCGGAAGAGCACACGTCTGAACTCCAGTCAC	rs9318024	A
TCCCTACACGACGCTCTTCCGATCTNNTAATCCTCATAAATTTATGACACCCTCATTATCTACTTTANNGATCGGAAGAGCACACGTCTGAACTCCAGTCAC	rs13378132	A
TCCCTACACGACGCTCTTCCGATCTNNTACCTCTATTTTTAAGCCGATATTATGCAAGGCCATTATANNGATCGGAAGAGCACACGTCTGAACTCCAGTCAC	rs9543725	A
TCCCTACACGACGCTCTTCCGATCTNNATTCCGGGAGTTGGTGTTCATATCTGTGAATTGAGGAAATNNGATCGGAAGAGCACACGTCTGAACTCCAGTCAC	rs9543728	A
TCCCTACACGACGCTCTTCCGATCTNNTAATCATGTGAGTCAACTCATAATAAATTTATTGGTATATNNGATCGGAAGAGCACACGTCTGAACTCCAGTCAC	rs7329608	A
TCCCTACACGACGCTCTTCCGATCTNNTTTAAAAAATTGGCATAATACTTGACTCATAGTTGGTGCTNNGATCGGAAGAGCACACGTCTGAACTCCAGTCAC	rs9543731	A
TCCCTACACGACGCTCTTCCGATCTNNTCTTGAAAGTAAGTCCATGACAGGAAAATAAACTTTTGTTNNGATCGGAAGAGCACACGTCTGAACTCCAGTCAC	rs7336064	A
TCCCTACACGACGCTCTTCCGATCTNNCATAGTAGCTTCATGTGTAAGGAACATAAGATTGAATCTTNNGATCGGAAGAGCACACGTCTGAACTCCAGTCAC	rs1326708	A
TCCCTACACGACGCTCTTCCGATCTNNAGGCTGTCCGTGAGGACTGAGATTCTGAAGGTAAATCTTANNGATCGGAAGAGCACACGTCTGAACTCCAGTCAC	rs1998889	A
TCCCTACACGACGCTCTTCCGATCTNNAGAAAAGAAAGAATGTTCGAGTAATTGGAACTTATCAAATNNGATCGGAAGAGCACACGTCTGAACTCCAGTCAC	rs1926598	A
TCCCTACACGACGCTCTTCCGATCTNNCATAAGAAAATAAACAGAAATAAAACAAACAAAAAAAACCNNGATCGGAAGAGCACACGTCTGAACTCCAGTCAC	rs9600354	A
TCCCTACACGACGCTCTTCCGATCTNNGAATTTATGTTCATAAGCAAGAATTAAACAAATGATTATTNNGATCGGAAGAGCACACGTCTGAACTCCAGTCAC	rs9600355	A
TCCCTACACGACGCTCTTCCGATCTNNTTCATAAGCACGAATTAAAAAAATGATTATTTTCTTTTACNNGATCGGAAGAGCACACGTCTGAACTCCAGTCAC	rs9600356	A
TCCCTACACGACGCTCTTCCGATCTNNGAGTAGCTGGGACTACAGGAGCATGCCACCATACCCAGCTNNGATCGGAAGAGCACACGTCTGAACTCCAGTCAC	rs7332024	A
TCCCTACACGACGCTCTTCCGATCTNNGGTTTGGCTAGGTGTTTCGAGAAGTTGGCCAGGCTAGTGTNNGATCGGAAGAGCACACGTCTGAACTCCAGTCAC	rs7333481	A
TCCCTACACGACGCTCTTCCGATCTNNAGTTGGCCAGGCTAGTGTCAAACTCCTGATCCACCCGCGTNNGATCGGAAGAGCACACGTCTGAACTCCAGTCAC	rs7332575	A
TCCCTACACGACGCTCTTCCGATCTNNAGGCGTGAACCACTGCACCAGGCCAAGAATGTTCTCTTCANNGATCGGAAGAGCACACGTCTGAACTCCAGTCAC	rs9543733	A
TCCCTACACGACGCTCTTCCGATCTNNGAATGCCTCTGTAAACCGTATAGCCAGGCCATAATATTTCNNGATCGGAAGAGCACACGTCTGAACTCCAGTCAC	rs9530360	A
TCCCTACACGACGCTCTTCCGATCTNNCAGTAAATTATCAGGAGTCATGTCATAGAGAGTCTAGTCANNGATCGGAAGAGCACACGTCTGAACTCCAGTCAC	rs9543734	A
TCCCTACACGACGCTCTTCCGATCTNNATGACTGTCATTTTGCTTAAGATGTTTTACATATTCACTANNGATCGGAAGAGCACACGTCTGAACTCCAGTCAC	rs9543736	A
TCCCTACACGACGCTCTTCCGATCTNNAACAGAAAAATAGAATCGAAAGAATAAGATTAAAAACAGANNGATCGGAAGAGCACACGTCTGAACTCCAGTCAC	rs2148973	A
TCCCTACACGACGCTCTTCCGATCTNNTGCCAAATGTGAAAATGTCATATCTTTAGAACTTTTGTCANNGATCGGAAGAGCACACGTCTGAACTCCAGTCAC	rs9318296	A
TCCCTACACGACGCTCTTCCGATCTNNTCTAGATTTACCAAGATCTAATATGGGGTTACCATGACTTNNGATCGGAAGAGCACACGTCTGAACTCCAGTCAC	rs4885213	A
TCCCTACACGACGCTCTTCCGATCTNNCTGCTAGTTTTTAGGCCATAGTCTTCCCTAGATATTGTTGNNGATCGGAAGAGCACACGTCTGAACTCCAGTCAC	rs4885214	A
TCCCTACACGACGCTCTTCCGATCTNNTCACCTTGTTTGGATGCTAAATAAGAATGCAATTCAGATTNNGATCGGAAGAGCACACGTCTGAACTCCAGTCAC	rs4885215	A
TCCCTACACGACGCTCTTCCGATCTNNATCTTTCATTGTATATGAGAATAATCTATCTACCAAGTGTNNGATCGGAAGAGCACACGTCTGAACTCCAGTCAC	rs2225148	A
TCCCTACACGACGCTCTTCCGATCTNNTTGCTGTAATAATCAGCTCAAGCCTCATGCCATGCGACTCNNGATCGGAAGAGCACACGTCTGAACTCCAGTCAC	rs1327727	A
TCCCTACACGACGCTCTTCCGATCTNNGGAGTCCTTCTGAATATCGAATAGAGAAGGAAACCATCAGNNGATCGGAAGAGCACACGTCTGAACTCCAGTCAC	rs4885216	A
TCCCTACACGACGCTCTTCCGATCTNNCAGTGTGGGTATGTATGCTAGTTATCTAGCTATTGCTTCCNNGATCGGAAGAGCACACGTCTGAACTCCAGTCAC	rs9318297	A
TCCCTACACGACGCTCTTCCGATCTNNTAATGTCCATCAGTGCTACAGGCACTGCTGAGTGGCTAACNNGATCGGAAGAGCACACGTCTGAACTCCAGTCAC	rs2325630	A
TCCCTACACGACGCTCTTCCGATCTNNTAAATATCTAGACTTGTGAAATATTAGCCTTATGTATTCTNNGATCGGAAGAGCACACGTCTGAACTCCAGTCAC	rs9543737	A
TCCCTACACGACGCTCTTCCGATCTNNCTAATCAGCTGCCAGTGTGACTAGGATAAAAGCAGGCAGANNGATCGGAAGAGCACACGTCTGAACTCCAGTCAC	rs2148969	A
TCCCTACACGACGCTCTTCCGATCTNNATTTGTAATGAACGCTGTAAGGCTGAGAACATGTTATAACNNGATCGGAAGAGCACACGTCTGAACTCCAGTCAC	rs7993357	A
TCCCTACACGACGCTCTTCCGATCTNNTGAATGGATTAAATAATCAACATTAAAAGATAAAGTACAGNNGATCGGAAGAGCACACGTCTGAACTCCAGTCAC	rs12871588	A
TCCCTACACGACGCTCTTCCGATCTNNAGTCTGATAACAAGCAATAAAAGTTGCTTAGTAATCTAGTNNGATCGGAAGAGCACACGTCTGAACTCCAGTCAC	rs10467409	A
TCCCTACACGACGCTCTTCCGATCTNNCCTTTTATATTCTTTGTACAACAAAATTGGAGTTCAGCTCNNGATCGGAAGAGCACACGTCTGAACTCCAGTCAC	rs10467412	A
TCCCTACACGACGCTCTTCCGATCTNNTATGTTAAAAGGAGTGAGAAAGAAGTGTTTCTCTGGTCATNNGATCGGAAGAGCACACGTCTGAACTCCAGTCAC	rs9318299	A
TCCCTACACGACGCTCTTCCGATCTNNTAAAATTAATGTATACTCCATGTGGGAAAAGTTCAAAGAGNNGATCGGAAGAGCACACGTCTGAACTCCAGTCAC	rs9573428	A
TCCCTACACGACGCTCTTCCGATCTNNAACATCAGTAAAATAAACCATTTAGCAGCTATAAGAGTTANNGATCGGAAGAGCACACGTCTGAACTCCAGTCAC	rs57147104	A
TCCCTACACGACGCTCTTCCGATCTNNGTTCTCCATTCATTGCATCACAGCCTTTTATCTATGATATNNGATCGGAAGAGCACACGTCTGAACTCCAGTCAC	rs7320083	A
TCCCTACACGACGCTCTTCCGATCTNNGGAAGTCCACAGACATTTTAGGAAAAGGCCTCCCAACAAGNNGATCGGAAGAGCACACGTCTGAACTCCAGTCAC	rs1410163	A
TCCCTACACGACGCTCTTCCGATCTNNTTTAGCATGTATGTATCAGAATGGCCATACAGATTGTTAANNGATCGGAAGAGCACACGTCTGAACTCCAGTCAC	rs1410164	A
TCCCTACACGACGCTCTTCCGATCTNNGTGTGTGGCCTGGGAATAGACCCTCATTCCCAATTCATACNNGATCGGAAGAGCACACGTCTGAACTCCAGTCAC	rs61965278	A
TCCCTACACGACGCTCTTCCGATCTNNACATTTTGATTTTCCCAGGAAAAGCTTATGCTTACTGGTTNNGATCGGAAGAGCACACGTCTGAACTCCAGTCAC	rs9600360	A
TCCCTACACGACGCTCTTCCGATCTNNTCTATCACATCTATTGAGTAGGGTATCTGGTGCAGATCCANNGATCGGAAGAGCACACGTCTGAACTCCAGTCAC	rs9530362	A
TCCCTACACGACGCTCTTCCGATCTNNGTCAAAACCAGAATACTGAAATTAATATAGTGAGGATATANNGATCGGAAGAGCACACGTCTGAACTCCAGTCAC	rs7338740	A
TCCCTACACGACGCTCTTCCGATCTNNTGTGCAGCTCACACTCGCAATAGGGCTGGGGATCCTGTGGNNGATCGGAAGAGCACACGTCTGAACTCCAGTCAC	rs7328344	A
TCCCTACACGACGCTCTTCCGATCTNNATCACGAGGTCAGGAGATCAAGACCATCCTGGCTAACACGNNGATCGGAAGAGCACACGTCTGAACTCCAGTCAC	rs6562839	A
TCCCTACACGACGCTCTTCCGATCTNNGCTGAGGGAGGAGAATGGCATGAGCCCGGGAGGTGGAGCTNNGATCGGAAGAGCACACGTCTGAACTCCAGTCAC	rs6562840	A
TCCCTACACGACGCTCTTCCGATCTNNCTCCAGCCTGGGCGACAGAAGGAGACTCAAAAAAATAAAANNGATCGGAAGAGCACACGTCTGAACTCCAGTCAC	rs6562841	A
TCCCTACACGACGCTCTTCCGATCTNNTTTTATCAAATACTTAGAAACTACATAACATATAATGCTANNGATCGGAAGAGCACACGTCTGAACTCCAGTCAC	rs9586881	A
TCCCTACACGACGCTCTTCCGATCTNNTTATTGCAAATTGAACTTCAGTTTAAAGCACACTTAAAAANNGATCGGAAGAGCACACGTCTGAACTCCAGTCAC	rs12877787	A
TCCCTACACGACGCTCTTCCGATCTNNGGTACTTGCCTTCAGGTTTACTTCCCCAGATTAAGTTGATNNGATCGGAAGAGCACACGTCTGAACTCCAGTCAC	rs11623400	A
TCCCTACACGACGCTCTTCCGATCTNNGTTCCAGGCAAGGCCAGCTACAGCCTCAGGTATTGAGGAGNNGATCGGAAGAGCACACGTCTGAACTCCAGTCAC	rs74039131	A
TCCCTACACGACGCTCTTCCGATCTNNAGTTTGCCCACAAACTGCCAGAGATGTGGGTGAGACCGTGNNGATCGGAAGAGCACACGTCTGAACTCCAGTCAC	rs17105315	A
TCCCTACACGACGCTCTTCCGATCTNNTTGTGTCCAGAACCCTCAAACCATCAAATTCCAGAATACTNNGATCGGAAGAGCACACGTCTGAACTCCAGTCAC	rs3759639	A
TCCCTACACGACGCTCTTCCGATCTNNATTAGTTTGCTAATAGCCTACTGCTCCACCCATGTCCCTGNNGATCGGAAGAGCACACGTCTGAACTCCAGTCAC	rs11627296	A
TCCCTACACGACGCTCTTCCGATCTNNTATAGTTTCTTCTGAAGAAAGGATGCTACCCTTCCCTTTANNGATCGGAAGAGCACACGTCTGAACTCCAGTCAC	rs11851426	A
TCCCTACACGACGCTCTTCCGATCTNNATCTGATAGAAGTTATCACAAAATTCCCACAGCAATCATTNNGATCGGAAGAGCACACGTCTGAACTCCAGTCAC	rs74039134	A
TCCCTACACGACGCTCTTCCGATCTNNCCATGGGAATGAAGATAGCATGGTATTGATGAGGCATAGANNGATCGGAAGAGCACACGTCTGAACTCCAGTCAC	rs11844124	A
TCCCTACACGACGCTCTTCCGATCTNNATTTTAGTACTGTATATAAAGTACTAATAATGAAGAAAAGNNGATCGGAAGAGCACACGTCTGAACTCCAGTCAC	rs56871173	A
TCCCTACACGACGCTCTTCCGATCTNNTGGTCAATAAACATGAAAAAGTGTTACTCTGACTAGATATNNGATCGGAAGAGCACACGTCTGAACTCCAGTCAC	rs2332402	A
TCCCTACACGACGCTCTTCCGATCTNNTATACCCTAGAGAAACATCAGGTGCAAATTTCTACCAGATNNGATCGGAAGAGCACACGTCTGAACTCCAGTCAC	rs11624387	A
TCCCTACACGACGCTCTTCCGATCTNNGTTTGCAAATATTTTCTCCAATTTTACAGGTTGTCTTTTANNGATCGGAAGAGCACACGTCTGAACTCCAGTCAC	rs11622908	A
TCCCTACACGACGCTCTTCCGATCTNNGCCATGCTGATTTGGTTACAATAGCTTTGTAGTATATTTTNNGATCGGAAGAGCACACGTCTGAACTCCAGTCAC	rs2332403	A
TCCCTACACGACGCTCTTCCGATCTNNCTTCATTTCAACTTTGGTGAATCTGACAATTATGTGTCTTNNGATCGGAAGAGCACACGTCTGAACTCCAGTCAC	rs11621703	A
TCCCTACACGACGCTCTTCCGATCTNNATCTCCTGTTTCATTTCTTAATGAGGTTATTTGGATTTTCNNGATCGGAAGAGCACACGTCTGAACTCCAGTCAC	rs80066683	A
TCCCTACACGACGCTCTTCCGATCTNNCATATTTTCTTATTCTTTTATCTTTGTCTTTGTTGGATTGNNGATCGGAAGAGCACACGTCTGAACTCCAGTCAC	rs61093051	A
TCCCTACACGACGCTCTTCCGATCTNNTGGATGTGGCTTCCTGTGAACCAAACTGCAGTGATTGTTGNNGATCGGAAGAGCACACGTCTGAACTCCAGTCAC	rs34530338	A
TCCCTACACGACGCTCTTCCGATCTNNCTATCTTTTTCTCTATTTCATTTAGCTCCTCTCGTTTTTTNNGATCGGAAGAGCACACGTCTGAACTCCAGTCAC	rs8021523	A
TCCCTACACGACGCTCTTCCGATCTNNTTTTTTGATGTAGTGTTTGATACTATAATCTTCCCTTTTANNGATCGGAAGAGCACACGTCTGAACTCCAGTCAC	rs76059978	A
TCCCTACACGACGCTCTTCCGATCTNNACAGTCTGTCTTATTTGATATAAGTATAGCTACACCTGCTNNGATCGGAAGAGCACACGTCTGAACTCCAGTCAC	rs34037718	A
TCCCTACACGACGCTCTTCCGATCTNNTTTCATCCTTTCACTTTCAATCTACATGTCTTTACAGGTGNNGATCGGAAGAGCACACGTCTGAACTCCAGTCAC	rs75836170	A
TCCCTACACGACGCTCTTCCGATCTNNTGCTGCAATAAACATAAGTATGCATGTGTCTTTATAGTAGNNGATCGGAAGAGCACACGTCTGAACTCCAGTCAC	rs12147169	A
TCCCTACACGACGCTCTTCCGATCTNNTATAGGTGTATCTACAGTGATGGCTGGGTAAAGCACTTTGNNGATCGGAAGAGCACACGTCTGAACTCCAGTCAC	rs74039181	A
TCCCTACACGACGCTCTTCCGATCTNNTAAGAAACTGAAAGAAAAAAGTTGTTCTGATTATTTATTANNGATCGGAAGAGCACACGTCTGAACTCCAGTCAC	rs1245314	A
TCCCTACACGACGCTCTTCCGATCTNNAGGTGATCCGCCTCCCTCGACCTCCCCAAATGCTGGGATTNNGATCGGAAGAGCACACGTCTGAACTCCAGTCAC	rs1245320	A
TCCCTACACGACGCTCTTCCGATCTNNACTGTGACTAAAAAAAAAAAATATATATATATTTTCTAAANNGATCGGAAGAGCACACGTCTGAACTCCAGTCAC	rs35517405	A
TCCCTACACGACGCTCTTCCGATCTNNTCATCAGTTAATCTGAAATAATGATACAAGCCACCACGTANNGATCGGAAGAGCACACGTCTGAACTCCAGTCAC	rs1957713	A
TCCCTACACGACGCTCTTCCGATCTNNATTAACGTTGAACTTGGCTAGTTGCAACTGATGTCTTTTTNNGATCGGAAGAGCACACGTCTGAACTCCAGTCAC	rs8012241	A
TCCCTACACGACGCTCTTCCGATCTNNAAGAGTTTACATCTTTTTTACAAAGAAAAACTTTCATGAGNNGATCGGAAGAGCACACGTCTGAACTCCAGTCAC	rs8013038	A
TCCCTACACGACGCTCTTCCGATCTNNACTTTCATGAGAGTCCCATATGTACAAAACTATCAGCACTNNGATCGGAAGAGCACACGTCTGAACTCCAGTCAC	rs8011324	A
TCCCTACACGACGCTCTTCCGATCTNNCACCAAAAGCAATGGCAACAAAAGCCAAAATTGACAAATGNNGATCGGAAGAGCACACGTCTGAACTCCAGTCAC	rs185433150	A
TCCCTACACGACGCTCTTCCGATCTNNCTCATCTGACAAAAGGCTAATATCCAGAATCTACAATGAANNGATCGGAAGAGCACACGTCTGAACTCCAGTCAC	rs34713644	A
TCCCTACACGACGCTCTTCCGATCTNNGGGCAAAGGATATGAACAGACACTTCTCAAAAGAAGATATNNGATCGGAAGAGCACACGTCTGAACTCCAGTCAC	rs67734020	A
TCCCTACACGACGCTCTTCCGATCTNNCATGAGAAAATGCTCATCAACACTGGCCATCAGAGAAATGNNGATCGGAAGAGCACACGTCTGAACTCCAGTCAC	rs34972408	A
TCCCTACACGACGCTCTTCCGATCTNNTAGAGAAGATGTGGAGAAAAAGGAACACTTTTACACTGTTNNGATCGGAAGAGCACACGTCTGAACTCCAGTCAC	rs36166667	A
TCCCTACACGACGCTCTTCCGATCTNNTTACACTGTTGGTGGGACTATAAACTAGTTTAACCATCGTNNGATCGGAAGAGCACACGTCTGAACTCCAGTCAC	rs67296470	A
TCCCTACACGACGCTCTTCCGATCTNNACTGTTGGTGGGACTATAAACTAGTTTAACCATCGTGTAANNGATCGGAAGAGCACACGTCTGAACTCCAGTCAC	rs67900149	A
TCCCTACACGACGCTCTTCCGATCTNNCTCTAAAACTTAAAGTATAATAATAATAAAAAAATAAAAANNGATCGGAAGAGCACACGTCTGAACTCCAGTCAC	rs8003493	A
TCCCTACACGACGCTCTTCCGATCTNNAAAAAAAAAAAGACATACTATTAGCTGTAGGAGAAGATAANNGATCGGAAGAGCACACGTCTGAACTCCAGTCAC	rs8005545	A
TCCCTACACGACGCTCTTCCGATCTNNGTTCAGTGCCTCTTAAGCTAGTCCTTCTTCAATGTTCTCTNNGATCGGAAGAGCACACGTCTGAACTCCAGTCAC	rs6575378	A
TCCCTACACGACGCTCTTCCGATCTNNATATTCAAATTTCCTTCTTATCTTTGCCACTTTACATCATNNGATCGGAAGAGCACACGTCTGAACTCCAGTCAC	rs6575379	A
TCCCTACACGACGCTCTTCCGATCTNNCCACCTGTCTAGTCTCCCTATATGTGCTCCTGGCACTACANNGATCGGAAGAGCACACGTCTGAACTCCAGTCAC	rs6575380	A
TCCCTACACGACGCTCTTCCGATCTNNAATATTTATATATAATTATAATAATAATATTCATATCCCCNNGATCGGAAGAGCACACGTCTGAACTCCAGTCAC	rs8015348	A
TCCCTACACGACGCTCTTCCGATCTNNATTTATATATAATTATTATAATAATATTCATATCCCCTTGNNGATCGGAAGAGCACACGTCTGAACTCCAGTCAC	rs8011059	A
TCCCTACACGACGCTCTTCCGATCTNNCCCTTGGACTATGATTTATATACTTATATGTAATTATTTTNNGATCGGAAGAGCACACGTCTGAACTCCAGTCAC	rs8011078	A
TCCCTACACGACGCTCTTCCGATCTNNTATTTTATATGGATATTTAAGGTATGTACTATATATAATTNNGATCGGAAGAGCACACGTCTGAACTCCAGTCAC	rs8009373	A
TCCCTACACGACGCTCTTCCGATCTNNGATATTTAGGGTATGTACTATATATAATTATATATGAATANNGATCGGAAGAGCACACGTCTGAACTCCAGTCAC	rs8011217	A
TCCCTACACGACGCTCTTCCGATCTNNTTTTGGCCATTATTATATAATTCCCCTTTGCCTCCCAAATNNGATCGGAAGAGCACACGTCTGAACTCCAGTCAC	rs6575382	A
TCCCTACACGACGCTCTTCCGATCTNNCATAAACAGAACCAATGACAGAAACCACATGATTATCTCANNGATCGGAAGAGCACACGTCTGAACTCCAGTCAC	rs10139926	A
TCCCTACACGACGCTCTTCCGATCTNNGAGTGAAATTCCATTCACAATTGCTACAAAGAGAATAAAANNGATCGGAAGAGCACACGTCTGAACTCCAGTCAC	rs10140383	A
TCCCTACACGACGCTCTTCCGATCTNNGGCCATGCTTATTATGCTTAAGAATTTTTTTAAAATTATANNGATCGGAAGAGCACACGTCTGAACTCCAGTCAC	rs9806036	A
TCCCTACACGACGCTCTTCCGATCTNNATATGGTCTCTGGTGAATAACAAGATGGATAAAAAAGGAGNNGATCGGAAGAGCACACGTCTGAACTCCAGTCAC	rs1176869	A
TCCCTACACGACGCTCTTCCGATCTNNACTGGTCATCAGAGAAATGAAAATCAAAAGCACAATGAGANNGATCGGAAGAGCACACGTCTGAACTCCAGTCAC	rs1154136	A
TCCCTACACGACGCTCTTCCGATCTNNACCATTTGACCCAGCCATCACATTACTGGGTATATACCCANNGATCGGAAGAGCACACGTCTGAACTCCAGTCAC	rs1176793	A
TCCCTACACGACGCTCTTCCGATCTNNTATTTATTCTAGCAGCTATACTCTTCTTCTCTCACAGTCANNGATCGGAAGAGCACACGTCTGAACTCCAGTCAC	rs1349124	A
TCCCTACACGACGCTCTTCCGATCTNNATGAACAAGTCTTATGGGCATTGGTTTGTGAAATCAAAATNNGATCGGAAGAGCACACGTCTGAACTCCAGTCAC	rs1451960	A
TCCCTACACGACGCTCTTCCGATCTNNTTTTCAGCTTCTGGCATTGATTATTGACTACCTACCTTGGNNGATCGGAAGAGCACACGTCTGAACTCCAGTCAC	rs3916285	A
TCCCTACACGACGCTCTTCCGATCTNNGAAGATGATTTCCCATGAAATCTGTTGTCTATAATAATATNNGATCGGAAGAGCACACGTCTGAACTCCAGTCAC	rs12895038	A
TCCCTACACGACGCTCTTCCGATCTNNCATCTATTTAAATGGAAGAATTCTAAAACTTAACACACTGNNGATCGGAAGAGCACACGTCTGAACTCCAGTCAC	rs12894641	A
TCCCTACACGACGCTCTTCCGATCTNNACAATAGACAATTTACCTAATCTGAAGCAATTTACAAAACNNGATCGGAAGAGCACACGTCTGAACTCCAGTCAC	rs1987295	A
TCCCTACACGACGCTCTTCCGATCTNNGGAAATCTAGTGTTGTTTTAACAAATCCAAGATTTAAAGANNGATCGGAAGAGCACACGTCTGAACTCCAGTCAC	rs1779586	A
TCCCTACACGACGCTCTTCCGATCTNNTTTCACAAATCCAAGATTTAAAGATTTGGAAGCAACTAGANNGATCGGAAGAGCACACGTCTGAACTCCAGTCAC	rs4904124	A
TCCCTACACGACGCTCTTCCGATCTNNGGATAGTCTTCTACTAACTATAAGAGACTGAAAATGTTATNNGATCGGAAGAGCACACGTCTGAACTCCAGTCAC	rs12886183	A
TCCCTACACGACGCTCTTCCGATCTNNTCCCTGCTCTGAAGTTGTAAGGGCAACACAATGGAACCAGNNGATCGGAAGAGCACACGTCTGAACTCCAGTCAC	rs10134847	A
TCCCTACACGACGCTCTTCCGATCTNNAAAGTGACCAATGATACTTAGGTTATTTCTCTTTCTCCCTNNGATCGGAAGAGCACACGTCTGAACTCCAGTCAC	rs10145823	A
TCCCTACACGACGCTCTTCCGATCTNNTGTATTTTCTTTCCAGGGTAACCTATGTACCCTCAGGAACNNGATCGGAAGAGCACACGTCTGAACTCCAGTCAC	rs2122030	A
TCCCTACACGACGCTCTTCCGATCTNNAAACTTGGTGTCTTACGCCATGTGAATAATCACAAAAGACNNGATCGGAAGAGCACACGTCTGAACTCCAGTCAC	rs2122029	A
TCCCTACACGACGCTCTTCCGATCTNNTACTGCACATTGGCCTCTTACTGCTGTTTGGAGTCTAATANNGATCGGAAGAGCACACGTCTGAACTCCAGTCAC	rs12892744	A
TCCCTACACGACGCTCTTCCGATCTNNTTATTTAATGCTTTTTATAAGTCACTTGAAATTTTCCTCTNNGATCGGAAGAGCACACGTCTGAACTCCAGTCAC	rs10129178	A
TCCCTACACGACGCTCTTCCGATCTNNATCATCCACACATTGGCTCAGCAACTGATAGAGGGATGATNNGATCGGAAGAGCACACGTCTGAACTCCAGTCAC	rs10141625	A
TCCCTACACGACGCTCTTCCGATCTNNCGGAGGGTGAACAGCCCCAAAGTCTTCAGTTGGCAAGTTGNNGATCGGAAGAGCACACGTCTGAACTCCAGTCAC	rs11626502	A
TCCCTACACGACGCTCTTCCGATCTNNTCTGTAAGCAAAACTTTGTACCATCTATAGCCAATCCAAANNGATCGGAAGAGCACACGTCTGAACTCCAGTCAC	rs1154140	A
TCCCTACACGACGCTCTTCCGATCTNNGAACAAGTTTGGAGGACTGATGTTATAAAGGGTGGATAAANNGATCGGAAGAGCACACGTCTGAACTCCAGTCAC	rs1530697	A
TCCCTACACGACGCTCTTCCGATCTNNTTCATGTGATTCTTTCTTGAAGATGCTCTCAATTATACTGNNGATCGGAAGAGCACACGTCTGAACTCCAGTCAC	rs17111230	A
TCCCTACACGACGCTCTTCCGATCTNNTAAATGTTGGTTCTAAGCTACCCAGTATATTGATGTGTAANNGATCGGAAGAGCACACGTCTGAACTCCAGTCAC	rs1451962	A
TCCCTACACGACGCTCTTCCGATCTNNTGAGAACCTTTTTCTCCAAAAAAGCAAGTTAATGGAATGCNNGATCGGAAGAGCACACGTCTGAACTCCAGTCAC	rs8019099	A
TCCCTACACGACGCTCTTCCGATCTNNAGCAAAGATAGAACTAGAAAGAAAAACTAACAAACCACCANNGATCGGAAGAGCACACGTCTGAACTCCAGTCAC	rs1177864	A
TCCCTACACGACGCTCTTCCGATCTNNTGACTTTTTAATGATCGCCATTGTAACTGGTGTGCGATGGNNGATCGGAAGAGCACACGTCTGAACTCCAGTCAC	rs7158486	A
TCCCTACACGACGCTCTTCCGATCTNNGAGACTTTGCTGAAGTTGCATAATAGCTTAAGGAGATTTTNNGATCGGAAGAGCACACGTCTGAACTCCAGTCAC	rs1176992	A
TCCCTACACGACGCTCTTCCGATCTNNTGTAACTGGTAGTTCTTACATAGCTAAGAGTCTTTTGGAANNGATCGGAAGAGCACACGTCTGAACTCCAGTCAC	rs1176953	A
TCCCTACACGACGCTCTTCCGATCTNNCCATTAGTTATTTTTCCTGATACTCTTCCTCCTGCCACCCNNGATCGGAAGAGCACACGTCTGAACTCCAGTCAC	rs1176954	A
TCCCTACACGACGCTCTTCCGATCTNNTTTTTAATAGTATTCCATGATGTATATATAGCACATTTTCNNGATCGGAAGAGCACACGTCTGAACTCCAGTCAC	rs28492914	A
TCCCTACACGACGCTCTTCCGATCTNNGAGAGACAGCATGGTGCAAAAGGTCCAACACTAATTTAGGNNGATCGGAAGAGCACACGTCTGAACTCCAGTCAC	rs12433000	A
TCCCTACACGACGCTCTTCCGATCTNNATTACATCATGGTAGAAATAACCTTTAAAATATGCACACANNGATCGGAAGAGCACACGTCTGAACTCCAGTCAC	rs10151544	A
TCCCTACACGACGCTCTTCCGATCTNNGAACAAACTAGAATCTGAGATTTTATTCCTTAATTGTCAANNGATCGGAAGAGCACACGTCTGAACTCCAGTCAC	rs17588107	A
TCCCTACACGACGCTCTTCCGATCTNNATATACAGATAACATAGCTACAGAGAATCAGCCAGAGAGANNGATCGGAAGAGCACACGTCTGAACTCCAGTCAC	rs9805877	A
TCCCTACACGACGCTCTTCCGATCTNNCCAATGATATTAATGTTAAATCATTTGTTACTGTCCCATTNNGATCGGAAGAGCACACGTCTGAACTCCAGTCAC	rs1451953	A
TCCCTACACGACGCTCTTCCGATCTNNCTATGGTGTATATGTGCCAAATTTTCCTAATCCAGTCTATNNGATCGGAAGAGCACACGTCTGAACTCCAGTCAC	rs10138748	A
TCCCTACACGACGCTCTTCCGATCTNNCTTTAATCCATCTTGAATTAATTTTTGTATAAGGTGTAAGNNGATCGGAAGAGCACACGTCTGAACTCCAGTCAC	rs200071283	A
TCCCTACACGACGCTCTTCCGATCTNNTTTTCAAGGGGAATGCTTCAATTTGCCCATTCAATATGATNNGATCGGAAGAGCACACGTCTGAACTCCAGTCAC	rs149553113	A
TCCCTACACGACGCTCTTCCGATCTNNCATTTGCTTGTCTGTAAAGAATTTTATTTCTCCTTCGCTTNNGATCGGAAGAGCACACGTCTGAACTCCAGTCAC	rs7493574	A
TCCCTACACGACGCTCTTCCGATCTNNCACTTTCAGGTACACCAATAAGACGTAGATTTGGTCTTTTNNGATCGGAAGAGCACACGTCTGAACTCCAGTCAC	rs145537307	A
TCCCTACACGACGCTCTTCCGATCTNNCTTCCAGTTGATCGCATCGACTCCTGAGGCTTCTGCATTCNNGATCGGAAGAGCACACGTCTGAACTCCAGTCAC	rs148627674	A
TCCCTACACGACGCTCTTCCGATCTNNTGGCAGGAATAAAACCTACATGGTCATGGTTGGATTAGCTNNGATCGGAAGAGCACACGTCTGAACTCCAGTCAC	rs1947334	A
TCCCTACACGACGCTCTTCCGATCTNNGTGTTCATCAGGGATACTAAAAGTTTTATCTTTTCATTTTNNGATCGGAAGAGCACACGTCTGAACTCCAGTCAC	rs1947335	A
TCCCTACACGACGCTCTTCCGATCTNNAGTCATTATATTTTGAATAAGATATGCCTAAAAGAAGAAANNGATCGGAAGAGCACACGTCTGAACTCCAGTCAC	rs9323037	A
TCCCTACACGACGCTCTTCCGATCTNNACTGTTGAGCACTAGTTATATGCTAGATGTTGTCCTATATNNGATCGGAAGAGCACACGTCTGAACTCCAGTCAC	rs935852	A
TCCCTACACGACGCTCTTCCGATCTNNTTCAAAGTGGTTCCTTTCAAGGTCACCACATCTCATATAANNGATCGGAAGAGCACACGTCTGAACTCCAGTCAC	rs10143161	A
TCCCTACACGACGCTCTTCCGATCTNNCAAAGGGAACCTGTATAAAATCCCCCCTACCGTATACATCNNGATCGGAAGAGCACACGTCTGAACTCCAGTCAC	rs1451961	A
TCCCTACACGACGCTCTTCCGATCTNNCTTGTGACTTAGCCTGGCTACTCCATTCCTCCCTGACTGTNNGATCGGAAGAGCACACGTCTGAACTCCAGTCAC	rs28535226	A
TCCCTACACGACGCTCTTCCGATCTNNTTTGTAATTTCCATAGCTCATCCCATACCTTAGCACTGCTNNGATCGGAAGAGCACACGTCTGAACTCCAGTCAC	rs12147567	A
TCCCTACACGACGCTCTTCCGATCTNNAGCTTAGTATAACTCTGTCATATAATTTGTAGTCATATACNNGATCGGAAGAGCACACGTCTGAACTCCAGTCAC	rs61983961	A
TCCCTACACGACGCTCTTCCGATCTNNGTCAAAGGTAATGTCTCCTATTTCATCTCTGATTATTTTTNNGATCGGAAGAGCACACGTCTGAACTCCAGTCAC	rs6572045	A
TCCCTACACGACGCTCTTCCGATCTNNTGCAGTGTTTGTTTTTCTGATCCTGTGTTAGTTTGCTGAANNGATCGGAAGAGCACACGTCTGAACTCCAGTCAC	rs7146166	A
TCCCTACACGACGCTCTTCCGATCTNNAGTATTCCATGGTGTATATATGCCACATTTTTTTAATCCANNGATCGGAAGAGCACACGTCTGAACTCCAGTCAC	rs7145360	A
TCCCTACACGACGCTCTTCCGATCTNNAAACTGAACAACCTGCTCCAGAATAACTACTGGGTAAAAANNGATCGGAAGAGCACACGTCTGAACTCCAGTCAC	rs28868687	A
TCCCTACACGACGCTCTTCCGATCTNNATTGCTGAATAGTATACTAAATCTTTTTATTTGTATAAATNNGATCGGAAGAGCACACGTCTGAACTCCAGTCAC	rs3911241	A
TCCCTACACGACGCTCTTCCGATCTNNTACCTGGGACTATAGGTGTAAGCCACTGCACCAGATCAAANNGATCGGAAGAGCACACGTCTGAACTCCAGTCAC	rs3911240	A
TCCCTACACGACGCTCTTCCGATCTNNTATATGTTAATAGGTTCTTAACATACTTCCTGAAGTGTGGNNGATCGGAAGAGCACACGTCTGAACTCCAGTCAC	rs10129320	A
TCCCTACACGACGCTCTTCCGATCTNNTCTCCTCGGGCAGGCAGGGAGCCACAGAGCCATCAGCTTANNGATCGGAAGAGCACACGTCTGAACTCCAGTCAC	rs1953242	A
TCCCTACACGACGCTCTTCCGATCTNNGAGTAGGGGGAGACTTCCTACCGCAGTGCTCCCTATGGGGNNGATCGGAAGAGCACACGTCTGAACTCCAGTCAC	rs58387887	A
TCCCTACACGACGCTCTTCCGATCTNNTCAGCTGCAAACCACAGCTAACTCTCCCACCTGGCACTGCNNGATCGGAAGAGCACACGTCTGAACTCCAGTCAC	rs10133981	A
TCCCTACACGACGCTCTTCCGATCTNNGGTACCCCACTCTACCCAGATCACGCTTCTTGCCAGCAATNNGATCGGAAGAGCACACGTCTGAACTCCAGTCAC	rs6574363	A
TCCCTACACGACGCTCTTCCGATCTNNGGAAGGGAGGGGAGGGGAGAACACACGGTGAGGTGGAAGCNNGATCGGAAGAGCACACGTCTGAACTCCAGTCAC	rs45458096	A
TCCCTACACGACGCTCTTCCGATCTNNCCTCTATTAACATTAATGAAGGTTGGTCTGAATGCCCAAGNNGATCGGAAGAGCACACGTCTGAACTCCAGTCAC	rs45518539	A
TCCCTACACGACGCTCTTCCGATCTNNCGGGGCGGCGCGCCTTCCTACACGCTGGATTCATTTGTTTNNGATCGGAAGAGCACACGTCTGAACTCCAGTCAC	rs10141995	A
TCCCTACACGACGCTCTTCCGATCTNNTGGCAACCTCCATATGATTATAATAAGTATCAGATGAGTANNGATCGGAAGAGCACACGTCTGAACTCCAGTCAC	rs7159378	A
TCCCTACACGACGCTCTTCCGATCTNNGCTTACTTTTCTAAGATAAAGGTTTCTTATAAATGCTTCCNNGATCGGAAGAGCACACGTCTGAACTCCAGTCAC	rs78002771	A
TCCCTACACGACGCTCTTCCGATCTNNCATAATACACCTGATATCTACTCTCCCTCCATCTGCCACTNNGATCGGAAGAGCACACGTCTGAACTCCAGTCAC	rs58212324	A
TCCCTACACGACGCTCTTCCGATCTNNAGCCACCAAGGAGAAGTCAATCTTTAGGGTCAGAGAGCTTNNGATCGGAAGAGCACACGTCTGAACTCCAGTCAC	rs73311328	A
TCCCTACACGACGCTCTTCCGATCTNNATGGTGCTTGCTTTCCCCTATCCTCCCACCATGATTGTTANNGATCGGAAGAGCACACGTCTGAACTCCAGTCAC	rs1959131	A
TCCCTACACGACGCTCTTCCGATCTNNATCAGCATGGACTTTTTAAAACAAGTCAAAAAAAAAATACNNGATCGGAAGAGCACACGTCTGAACTCCAGTCAC	rs1959122	A
TCCCTACACGACGCTCTTCCGATCTNNCCCATGGGAACTTAGTTGCAAGAAATCCTTCTTCACAAAGNNGATCGGAAGAGCACACGTCTGAACTCCAGTCAC	rs2119701	A
TCCCTACACGACGCTCTTCCGATCTNNCACCTGTCAGACCTATTCCATTCCTACTCAAGCCCCTCAANNGATCGGAAGAGCACACGTCTGAACTCCAGTCAC	rs3844024	A
TCCCTACACGACGCTCTTCCGATCTNNAGTGCCCACTCCATGGCTCATGGGCCGTCATCAACCCGCANNGATCGGAAGAGCACACGTCTGAACTCCAGTCAC	rs12888666	A
TCCCTACACGACGCTCTTCCGATCTNNATTTTCAAAACACCTTACTACTAGTGAATATTTTAAGTTCNNGATCGGAAGAGCACACGTCTGAACTCCAGTCAC	rs2269315	A
TCCCTACACGACGCTCTTCCGATCTNNATTTTAACAGGAAATAAACAAAGCACAAACAGTACCTACTNNGATCGGAAGAGCACACGTCTGAACTCCAGTCAC	rs12587119	A
TCCCTACACGACGCTCTTCCGATCTNNGTGAGCCAAGATGGCGCCAATGCACTCCAGCCTGGGTGACNNGATCGGAAGAGCACACGTCTGAACTCCAGTCAC	rs12586894	A
TCCCTACACGACGCTCTTCCGATCTNNAATAAAACCACAACCTTCTATTACAAGCAGTACTGAGAGANNGATCGGAAGAGCACACGTCTGAACTCCAGTCAC	rs2165567	A
TCCCTACACGACGCTCTTCCGATCTNNTTTGATCTCTCTGTAGTTTACAAATCCCCATGTCCAACTTNNGATCGGAAGAGCACACGTCTGAACTCCAGTCAC	rs2119702	A
TCCCTACACGACGCTCTTCCGATCTNNTTATTCCAAAAGTAATGTGACATTTTTTCAAAAACTAGAANNGATCGGAAGAGCACACGTCTGAACTCCAGTCAC	rs2245387	A
TCCCTACACGACGCTCTTCCGATCTNNTAAAACGGTATGATAGCAGACTGTTGTCTCACTTCAGGAANNGATCGGAAGAGCACACGTCTGAACTCCAGTCAC	rs12879345	A
TCCCTACACGACGCTCTTCCGATCTNNCAAATCTATGTTGTGTGTGACTGATTCCTCATAGTGAGAGNNGATCGGAAGAGCACACGTCTGAACTCCAGTCAC	rs930467	A
TCCCTACACGACGCTCTTCCGATCTNNGACTTCCTGGGCTTTTCTTAGGTGGTAGAATTTTTATTACNNGATCGGAAGAGCACACGTCTGAACTCCAGTCAC	rs1372361	A
TCCCTACACGACGCTCTTCCGATCTNNTACGAAACCAAGCAAAAATAAGAACTTTGAATTACAGTCANNGATCGGAAGAGCACACGTCTGAACTCCAGTCAC	rs9671908	A
TCCCTACACGACGCTCTTCCGATCTNNAGTATTCTGTTGCATGGTTATACTCCATTTTGTTTATCTANNGATCGGAAGAGCACACGTCTGAACTCCAGTCAC	rs12878534	A
TCCCTACACGACGCTCTTCCGATCTNNCCGAGCTTGAAAGATTTCTATATAAAGGAAAAGGAAATAGNNGATCGGAAGAGCACACGTCTGAACTCCAGTCAC	rs12878879	A
TCCCTACACGACGCTCTTCCGATCTNNTAAAGAATAAACTATGTTCAACCTGCCACAAGATTTTTCTNNGATCGGAAGAGCACACGTCTGAACTCCAGTCAC	rs12050084	A
TCCCTACACGACGCTCTTCCGATCTNNGTTCCCTGATAACACTGATATGAGTGGGACACACTTTGAGNNGATCGGAAGAGCACACGTCTGAACTCCAGTCAC	rs4899932	A
TCCCTACACGACGCTCTTCCGATCTNNAGTGCCTTCTAGTGAGTGGATCTCCAAGACGAGAAACAGTNNGATCGGAAGAGCACACGTCTGAACTCCAGTCAC	rs201640821	A
TCCCTACACGACGCTCTTCCGATCTNNTACATTATTTTCCATTGAAAACGATGTTTATTTCCTTTTANNGATCGGAAGAGCACACGTCTGAACTCCAGTCAC	rs12878241	A
TCCCTACACGACGCTCTTCCGATCTNNGTTACTAAAGATATAAATTAGAATCATTGCCAGGTCAAGTNNGATCGGAAGAGCACACGTCTGAACTCCAGTCAC	rs4904411	A
TCCCTACACGACGCTCTTCCGATCTNNAGTACCCACAATGCTTCAGACTGTGTGCCAATTTGGGAGGNNGATCGGAAGAGCACACGTCTGAACTCCAGTCAC	rs4243680	A
TCCCTACACGACGCTCTTCCGATCTNNCTTTTTGGCTAGTAGGAGAAACAGATAAATAAACAGCAAGNNGATCGGAAGAGCACACGTCTGAACTCCAGTCAC	rs1545227	A
TCCCTACACGACGCTCTTCCGATCTNNTGTCATGAGCATATTGACAATATATGAAGATGGCTCTAGTNNGATCGGAAGAGCACACGTCTGAACTCCAGTCAC	rs7141184	A
TCCCTACACGACGCTCTTCCGATCTNNTGGGAAGGGCAGAAAAAAAAAACACCCAGTTAGGAAAGCTNNGATCGGAAGAGCACACGTCTGAACTCCAGTCAC	rs7145963	A
TCCCTACACGACGCTCTTCCGATCTNNGGTGCCATCCTCCAAGATGAGGTATTCTCCCTAAATCAGTNNGATCGGAAGAGCACACGTCTGAACTCCAGTCAC	rs1441808	A
TCCCTACACGACGCTCTTCCGATCTNNACCATAGTGGATATGGGAGAGAGAACGTCTACTGTAAGTTNNGATCGGAAGAGCACACGTCTGAACTCCAGTCAC	rs1372356	A
TCCCTACACGACGCTCTTCCGATCTNNACACACATACATATATATAAGTGTGTGTGTATATATATCANNGATCGGAAGAGCACACGTCTGAACTCCAGTCAC	rs7156390	A
TCCCTACACGACGCTCTTCCGATCTNNGCTGTGGGTTTGTCATAGAAGGATTTTATTACCTCAAAGTNNGATCGGAAGAGCACACGTCTGAACTCCAGTCAC	rs1816776	A
TCCCTACACGACGCTCTTCCGATCTNNAATTTCACTGAGGGTTTTAATCATAAAGGGATGCTGCACTNNGATCGGAAGAGCACACGTCTGAACTCCAGTCAC	rs1837849	A
TCCCTACACGACGCTCTTCCGATCTNNTGACTGATAGAATTCAGCAATGATTTTTGTCTGGTCCTGANNGATCGGAAGAGCACACGTCTGAACTCCAGTCAC	rs8019631	A
TCCCTACACGACGCTCTTCCGATCTNNTTATGTGTTAGGTAAGTCTACTGAAGACAGAAGAAACTTTNNGATCGGAAGAGCACACGTCTGAACTCCAGTCAC	rs7146799	A
TCCCTACACGACGCTCTTCCGATCTNNCAGGTTTCCTGATGCTTTTACCTGACAGCTCTTAACTTTANNGATCGGAAGAGCACACGTCTGAACTCCAGTCAC	rs1837848	A
TCCCTACACGACGCTCTTCCGATCTNNGGTCTCGCAGCCATGGATAACACCACGTGCTCTGGTGGAGNNGATCGGAAGAGCACACGTCTGAACTCCAGTCAC	rs4259983	A
TCCCTACACGACGCTCTTCCGATCTNNCAATCCCACTGCTAGGTACATACCCCAAAGAAAGGAAATCNNGATCGGAAGAGCACACGTCTGAACTCCAGTCAC	rs4904417	A
TCCCTACACGACGCTCTTCCGATCTNNAGAAGCAAAGTGAATCCCAAACAGGAAAAATTCAGAGAAANNGATCGGAAGAGCACACGTCTGAACTCCAGTCAC	rs10130801	A
TCCCTACACGACGCTCTTCCGATCTNNGGACAGTGGATTTCTCACTAAAAAGCATGGAGGCCAGAAGNNGATCGGAAGAGCACACGTCTGAACTCCAGTCAC	rs7493001	A
TCCCTACACGACGCTCTTCCGATCTNNAATTATAAAAGAAAGAGTCATGGGGACGTCTGGAAGTAAGNNGATCGGAAGAGCACACGTCTGAACTCCAGTCAC	rs12884100	A
TCCCTACACGACGCTCTTCCGATCTNNCAGGAGAATCACTTGAACCAGGGAGGCGGAGGTTGCGGTGNNGATCGGAAGAGCACACGTCTGAACTCCAGTCAC	rs12885158	A
TCCCTACACGACGCTCTTCCGATCTNNGGGGAGAATTCATTTCCTTATCTTTTACAGGTCATAGTGGNNGATCGGAAGAGCACACGTCTGAACTCCAGTCAC	rs10873389	A
TCCCTACACGACGCTCTTCCGATCTNNCTTGAGCAAATAAAGAGGTAGTAACATCAATGACCAACTGNNGATCGGAAGAGCACACGTCTGAACTCCAGTCAC	rs4144361	A
TCCCTACACGACGCTCTTCCGATCTNNTTCAATACATATATTTATAAGGCAAGTTGGGTTGCTTTCCNNGATCGGAAGAGCACACGTCTGAACTCCAGTCAC	rs8014682	A
TCCCTACACGACGCTCTTCCGATCTNNAGAAATGGACTGATTCAGGAAGAAAATCAGTAAGCACATTNNGATCGGAAGAGCACACGTCTGAACTCCAGTCAC	rs4904421	A
TCCCTACACGACGCTCTTCCGATCTNNATAGAGGGCACCTCTGCCAACTTCCTGACACTGTTGTAAANNGATCGGAAGAGCACACGTCTGAACTCCAGTCAC	rs11159838	A
TCCCTACACGACGCTCTTCCGATCTNNCTGATATCTATTTCATTTAAGCCTTCTGATGACGCCAGCTNNGATCGGAAGAGCACACGTCTGAACTCCAGTCAC	rs12878664	A
TCCCTACACGACGCTCTTCCGATCTNNCCCCTTGTTCAGGTCTGGAAGGAAGTGACCCAGGATGTCTNNGATCGGAAGAGCACACGTCTGAACTCCAGTCAC	rs7156276	A
TCCCTACACGACGCTCTTCCGATCTNNATGAATGGATTATAAAAACATATGTCAATATGGGTGAATCNNGATCGGAAGAGCACACGTCTGAACTCCAGTCAC	rs11159839	A
TCCCTACACGACGCTCTTCCGATCTNNTGCCCAACACCATGATTTAAGCCTTGTGACACCTGGTATGNNGATCGGAAGAGCACACGTCTGAACTCCAGTCAC	rs4899939	A
TCCCTACACGACGCTCTTCCGATCTNNCAAAAATTATATTCAACCCATGAAACCTTGAGTGAATCAANNGATCGGAAGAGCACACGTCTGAACTCCAGTCAC	rs4899940	A
TCCCTACACGACGCTCTTCCGATCTNNAAGGTGGATCACTTGAGATAAGGAGTTCAAGAACAACCTGNNGATCGGAAGAGCACACGTCTGAACTCCAGTCAC	rs2896074	A
TCCCTACACGACGCTCTTCCGATCTNNGAAGAAGAAGAAGAAGAAGAAGAAGAAGGAGGAGGAGGAGNNGATCGGAAGAGCACACGTCTGAACTCCAGTCAC	rs71413750	A
TCCCTACACGACGCTCTTCCGATCTNNGAAGAAGAAGAAGAAGAAGAAGAAGGAGGAGGAGGAGAGANNGATCGGAAGAGCACACGTCTGAACTCCAGTCAC	rs5005625	A
TCCCTACACGACGCTCTTCCGATCTNNTTGTTAGCTGCATTTAAATAACAACACTTTCAGATCCAAGNNGATCGGAAGAGCACACGTCTGAACTCCAGTCAC	rs11159840	A
TCCCTACACGACGCTCTTCCGATCTNNAAAACTTTAAGCTGAAATGAAGGCGTGAGGGAAACTGTATNNGATCGGAAGAGCACACGTCTGAACTCCAGTCAC	rs12893091	A
TCCCTACACGACGCTCTTCCGATCTNNCCTCCGGGCTGAGACAGCAAGAGCAGCCAGAGATCCCGACNNGATCGGAAGAGCACACGTCTGAACTCCAGTCAC	rs12894714	A
TCCCTACACGACGCTCTTCCGATCTNNCTGAGTTATCTAAAAGGCAATGTTCAGTGGTGGGCAGAAANNGATCGGAAGAGCACACGTCTGAACTCCAGTCAC	rs4900321	A
TCCCTACACGACGCTCTTCCGATCTNNTAAAAAAGATGTCCAGAAGACCGGGCGCGGTGGCTCACACNNGATCGGAAGAGCACACGTCTGAACTCCAGTCAC	rs12435477	A
TCCCTACACGACGCTCTTCCGATCTNNATATTTGTAAAATGAATAAATGTTTGGAGGAAGGGGGCTCNNGATCGGAAGAGCACACGTCTGAACTCCAGTCAC	rs4905480	A
TCCCTACACGACGCTCTTCCGATCTNNAGAGAGAAATCAGCAACCCAGGACATATGAGAAAGCAGCANNGATCGGAAGAGCACACGTCTGAACTCCAGTCAC	rs7158298	A
TCCCTACACGACGCTCTTCCGATCTNNTCTCATTCTGCATTGTGGTAATATTACCAACAATCATGTGNNGATCGGAAGAGCACACGTCTGAACTCCAGTCAC	rs12432561	A
TCCCTACACGACGCTCTTCCGATCTNNCTGGGAGGCGGAGGCTGCAATGAGCAGAGATCACGCCATTNNGATCGGAAGAGCACACGTCTGAACTCCAGTCAC	rs11846693	A
TCCCTACACGACGCTCTTCCGATCTNNACGCTAAGTACAGGAAGCCAAGTACAATTCCATTTACATGNNGATCGGAAGAGCACACGTCTGAACTCCAGTCAC	rs12435016	A
TCCCTACACGACGCTCTTCCGATCTNNAGAAGTGACATGCAAAATAATTTTTTAAACATAAAACTTTNNGATCGGAAGAGCACACGTCTGAACTCCAGTCAC	rs972726	A
TCCCTACACGACGCTCTTCCGATCTNNCTAAAATAAGTCTATGAATATGAGGCTTAAAGAGAGCTAANNGATCGGAAGAGCACACGTCTGAACTCCAGTCAC	rs34869733	A
TCCCTACACGACGCTCTTCCGATCTNNGACCTCAATAATGTAAACAAGTCACGACATGGCAGGGACTNNGATCGGAAGAGCACACGTCTGAACTCCAGTCAC	rs3759602	A
TCCCTACACGACGCTCTTCCGATCTNNTGTACCTTAGACCTTCTTTAAAAGGCTCCAGGCTTCATATNNGATCGGAAGAGCACACGTCTGAACTCCAGTCAC	rs3759601	A
TCCCTACACGACGCTCTTCCGATCTNNATTTAATTGGAAAATCATAACGGTAAAAGGAAAAAAATCANNGATCGGAAGAGCACACGTCTGAACTCCAGTCAC	rs1890914	A
TCCCTACACGACGCTCTTCCGATCTNNACAAAGTTTGATCTGCAACAAAAGCTAAATCCCCAAAGTTNNGATCGGAAGAGCACACGTCTGAACTCCAGTCAC	rs11160331	A
TCCCTACACGACGCTCTTCCGATCTNNAATTCAGTTCTTTCCCTAGAAATACCTGATTTTTCTCTCANNGATCGGAAGAGCACACGTCTGAACTCCAGTCAC	rs12882717	A
TCCCTACACGACGCTCTTCCGATCTNNTTCAGCACCCCTAATTAATACCATCTTTATCTACACTATANNGATCGGAAGAGCACACGTCTGAACTCCAGTCAC	rs12432418	A
TCCCTACACGACGCTCTTCCGATCTNNGTATATATGTATGTGGTGCATGTATATATATATGGTGTATNNGATCGGAAGAGCACACGTCTGAACTCCAGTCAC	rs12881888	A
TCCCTACACGACGCTCTTCCGATCTNNATGGAAAACCAAATACCATATGTTCTCACTTATAAGTGGGNNGATCGGAAGAGCACACGTCTGAACTCCAGTCAC	rs11160332	A
TCCCTACACGACGCTCTTCCGATCTNNAATTACCTTCAGGCTATGTATATAAGGCATATATGAAACANNGATCGGAAGAGCACACGTCTGAACTCCAGTCAC	rs12878770	A
TCCCTACACGACGCTCTTCCGATCTNNAGACGATTTCCATGCATGCATAATCGGTTTTCAAAATACANNGATCGGAAGAGCACACGTCTGAACTCCAGTCAC	rs12590189	A
TCCCTACACGACGCTCTTCCGATCTNNGCCCCCTGACACTCAATCCAGTGTCCCTTTAACATTTTTCNNGATCGGAAGAGCACACGTCTGAACTCCAGTCAC	rs11624919	A
TCCCTACACGACGCTCTTCCGATCTNNTTGGGAGGCTGAGACGGGCAGATCTCTCGAGGTCAGCAGTNNGATCGGAAGAGCACACGTCTGAACTCCAGTCAC	rs12882534	A
TCCCTACACGACGCTCTTCCGATCTNNACCTTTGTCAGACGGATAGATTGCAAAAATTTTCTCCCATNNGATCGGAAGAGCACACGTCTGAACTCCAGTCAC	rs11160333	A
TCCCTACACGACGCTCTTCCGATCTNNGGAGGGAGGGGGCGGCACCACCGGTCGGCTCCAGTCGCCTNNGATCGGAAGAGCACACGTCTGAACTCCAGTCAC	rs35941406	A
TCCCTACACGACGCTCTTCCGATCTNNGCCGTCAGGCCTTCCGGATAGGGACGCGACGCCATGCAGCNNGATCGGAAGAGCACACGTCTGAACTCCAGTCAC	rs35946663	A
TCCCTACACGACGCTCTTCCGATCTNNGAATGAGTGAGTTTTCACTATCAGTTTCTGACAGAACTGGNNGATCGGAAGAGCACACGTCTGAACTCCAGTCAC	rs11627143	A
TCCCTACACGACGCTCTTCCGATCTNNGAGAGAGTTTCTGCTTCTTAATCTATAACTTGGAGATTTANNGATCGGAAGAGCACACGTCTGAACTCCAGTCAC	rs4145001	A
TCCCTACACGACGCTCTTCCGATCTNNCTGGTACAGAATGTTGATAAAAAGCTTAAAATTCTTGCATNNGATCGGAAGAGCACACGTCTGAACTCCAGTCAC	rs1545280	A
TCCCTACACGACGCTCTTCCGATCTNNGTCATTTGAAAGAATGCTGAAGTATATTTTCTAAGTTTTGNNGATCGGAAGAGCACACGTCTGAACTCCAGTCAC	rs1899588	A
TCCCTACACGACGCTCTTCCGATCTNNGCAAAATCCCATCTCTACTAAAAATACAAAAATTAGCCAGNNGATCGGAAGAGCACACGTCTGAACTCCAGTCAC	rs12897559	A
TCCCTACACGACGCTCTTCCGATCTNNGCTGAGGTGGGAGAATCACATGAACCTGGGAGACGGAGGTNNGATCGGAAGAGCACACGTCTGAACTCCAGTCAC	rs2218171	A
TCCCTACACGACGCTCTTCCGATCTNNCCTCCCCCAAGAGCCCAGCAGAGGCCCTTCATGGCACAGGNNGATCGGAAGAGCACACGTCTGAACTCCAGTCAC	rs2291534	A
TCCCTACACGACGCTCTTCCGATCTNNTTGTATTTTCAGTAGAGATAGGGTTTCACCATGTTGGTCANNGATCGGAAGAGCACACGTCTGAACTCCAGTCAC	rs111249770	A
TCCCTACACGACGCTCTTCCGATCTNNGTCTGGGCATGGTGGCTCAAGCCTATAATCCCAGCACTTTNNGATCGGAAGAGCACACGTCTGAACTCCAGTCAC	rs71402282	A
TCCCTACACGACGCTCTTCCGATCTNNATGACTTAGGTATTGGAGCAAGCGCCGGCTTCCCCTGCCGNNGATCGGAAGAGCACACGTCTGAACTCCAGTCAC	rs34830730	A
TCCCTACACGACGCTCTTCCGATCTNNCTCACGTGTCAAGAGACAGATCTGTGACATCAGCATCACANNGATCGGAAGAGCACACGTCTGAACTCCAGTCAC	rs12102248	A
TCCCTACACGACGCTCTTCCGATCTNNTCCCGCTGATCAGAATGCAACATGGAGGCCTGATGAGCCCNNGATCGGAAGAGCACACGTCTGAACTCCAGTCAC	rs1491635	A
TCCCTACACGACGCTCTTCCGATCTNNTTTCTGTAACAATGATGGTATCTTCAACTATGTAATCCTTNNGATCGGAAGAGCACACGTCTGAACTCCAGTCAC	rs8037496	A
TCCCTACACGACGCTCTTCCGATCTNNATTCTCCTCTTCATTTATAACTTTTATACCTCTGGTATATNNGATCGGAAGAGCACACGTCTGAACTCCAGTCAC	rs34054994	A
TCCCTACACGACGCTCTTCCGATCTNNAGGGTGGAGAAAGCAGGGCAGCTGTGGGCACTGGGGGTTGNNGATCGGAAGAGCACACGTCTGAACTCCAGTCAC	rs60280851	A
TCCCTACACGACGCTCTTCCGATCTNNGGGCCTCTCTATTCACTACATCCCCCTTCTCAGCCTCAGTNNGATCGGAAGAGCACACGTCTGAACTCCAGTCAC	rs749555	A
TCCCTACACGACGCTCTTCCGATCTNNCTAGATGAGTTATTACTCCAGAAAGCCTTGGATTTCTTATNNGATCGGAAGAGCACACGTCTGAACTCCAGTCAC	rs17278757	A
TCCCTACACGACGCTCTTCCGATCTNNTGGCTAAGAGTTTAGCACCATGCCTGACACACAGTGAGCCNNGATCGGAAGAGCACACGTCTGAACTCCAGTCAC	rs2165257	A
TCCCTACACGACGCTCTTCCGATCTNNGCAAGCCGGAGACAGGACTAGGCCTTGAGAAGCAGGGAGCNNGATCGGAAGAGCACACGTCTGAACTCCAGTCAC	rs34564985	A
TCCCTACACGACGCTCTTCCGATCTNNGAGAGCATGATGGGGCCCAAAGGAATAGTGAACCGGGGTGNNGATCGGAAGAGCACACGTCTGAACTCCAGTCAC	rs35216534	A
TCCCTACACGACGCTCTTCCGATCTNNCTAGCAATTCTCTTATCTCAGCCTTCCAAAGTGCTGGGATNNGATCGGAAGAGCACACGTCTGAACTCCAGTCAC	rs67888371	A
TCCCTACACGACGCTCTTCCGATCTNNGGCAGGCGAATCACTTAAGATCAGGAGTTCGAGACCAGCTNNGATCGGAAGAGCACACGTCTGAACTCCAGTCAC	rs66691901	A
TCCCTACACGACGCTCTTCCGATCTNNCAGTGTCTGTAACTCGGGAATGAAGCCAGCGAATGCCCCANNGATCGGAAGAGCACACGTCTGAACTCCAGTCAC	rs995971	A
TCCCTACACGACGCTCTTCCGATCTNNAACATCAAACTCAGCAGTGATCCATGACCTCACCAGGCAGNNGATCGGAAGAGCACACGTCTGAACTCCAGTCAC	rs56268459	A
TCCCTACACGACGCTCTTCCGATCTNNCCCAGGTCCTGTTGTCAGAAAAGGAGTCAGGCAGAACAGCNNGATCGGAAGAGCACACGTCTGAACTCCAGTCAC	rs66523805	A
TCCCTACACGACGCTCTTCCGATCTNNATTCCCAGGGTCATTACCTAGGAGGTGGTGCATCTCCTTCNNGATCGGAAGAGCACACGTCTGAACTCCAGTCAC	rs12901895	A
TCCCTACACGACGCTCTTCCGATCTNNAATCCCAGCTACTCGCGAAACTGAGGCAGGAGAATCGCTTNNGATCGGAAGAGCACACGTCTGAACTCCAGTCAC	rs34202070	A
TCCCTACACGACGCTCTTCCGATCTNNACCTGAGGCAGGAGAATCGATTGAACCCAGAAGGAGGAGGNNGATCGGAAGAGCACACGTCTGAACTCCAGTCAC	rs202104898	A
TCCCTACACGACGCTCTTCCGATCTNNAGAGAAGTTCTGTGTTTCTATCAGAGAAGAAGTCTGGGAANNGATCGGAAGAGCACACGTCTGAACTCCAGTCAC	rs2415023	A
TCCCTACACGACGCTCTTCCGATCTNNGAGAAGTTCTGTGTTTCTGACAGAGAAGAAGTCTGGGAAANNGATCGGAAGAGCACACGTCTGAACTCCAGTCAC	rs2415022	A
TCCCTACACGACGCTCTTCCGATCTNNCCCTGAATCCCAGAGTGCTACCCTGCTGCTGTAGCAGTGCNNGATCGGAAGAGCACACGTCTGAACTCCAGTCAC	rs35670506	A
TCCCTACACGACGCTCTTCCGATCTNNGAGTCCTCTTTTCCCTCCTAGTTCCTTGGGCCAAATGGCGNNGATCGGAAGAGCACACGTCTGAACTCCAGTCAC	rs34341630	A
TCCCTACACGACGCTCTTCCGATCTNNGCTTGTATGGCACGTACATATGTGTGTGTGTGTTCACTTGNNGATCGGAAGAGCACACGTCTGAACTCCAGTCAC	rs6494760	A
TCCCTACACGACGCTCTTCCGATCTNNATATACATGTGTATGTTGCAGACAGTCACTGGAAAATAGGNNGATCGGAAGAGCACACGTCTGAACTCCAGTCAC	rs8033246	A
TCCCTACACGACGCTCTTCCGATCTNNAACCGCACTAGAAATGTTGAGCTCCTACTTCTGTTTTTTTNNGATCGGAAGAGCACACGTCTGAACTCCAGTCAC	rs56094696	A
TCCCTACACGACGCTCTTCCGATCTNNCCAGGCTGGAGTGCAATGGAGCAACCTTGGCTCATTGCAANNGATCGGAAGAGCACACGTCTGAACTCCAGTCAC	rs12915890	A
TCCCTACACGACGCTCTTCCGATCTNNATTCAACATTTGACATTGAAGTTCTGTCCCAGCACCAAGANNGATCGGAAGAGCACACGTCTGAACTCCAGTCAC	rs34320419	A
TCCCTACACGACGCTCTTCCGATCTNNTGTTCTTTAATTTTTATGTATGTTAAAGTAATAAATGTGCNNGATCGGAAGAGCACACGTCTGAACTCCAGTCAC	rs55734137	A
TCCCTACACGACGCTCTTCCGATCTNNTGTGCTGGGGTTGGCTTGTATTGGCTCGTGAGAGCCTACTNNGATCGGAAGAGCACACGTCTGAACTCCAGTCAC	rs34829893	A
TCCCTACACGACGCTCTTCCGATCTNNCTGGTTTTCGGCCAGGTGCAGTGGCTCACGCCTGTAATCCNNGATCGGAAGAGCACACGTCTGAACTCCAGTCAC	rs113548876	A
TCCCTACACGACGCTCTTCCGATCTNNTCTGTTCTGAATAGGTTCCAGTGATGTTGCCTAACCTGCCNNGATCGGAAGAGCACACGTCTGAACTCCAGTCAC	rs16952387	A
TCCCTACACGACGCTCTTCCGATCTNNTTCCAGAGTTAAAGATAACATGCGTAACCCTAATAAATCTNNGATCGGAAGAGCACACGTCTGAACTCCAGTCAC	rs11852724	A
TCCCTACACGACGCTCTTCCGATCTNNCACTACACTCCAGCCTGGGAGACAGAGTGAGACTCTGTCTNNGATCGGAAGAGCACACGTCTGAACTCCAGTCAC	rs112310437	A
TCCCTACACGACGCTCTTCCGATCTNNAAGACCTGAGAGATGGAAGAATAGCTTCTGCCTATTCCCCNNGATCGGAAGAGCACACGTCTGAACTCCAGTCAC	rs34232451	A
TCCCTACACGACGCTCTTCCGATCTNNCACCCAGTCTGGAGTGCAGAGGCACAATCTTGGCTCACCGNNGATCGGAAGAGCACACGTCTGAACTCCAGTCAC	rs12910996	A
TCCCTACACGACGCTCTTCCGATCTNNATTCAAACACAGGCCTGTGAGACTCCGAAGACTATGCTTTNNGATCGGAAGAGCACACGTCTGAACTCCAGTCAC	rs66786238	A
TCCCTACACGACGCTCTTCCGATCTNNAATAAATGCTTAGTAGGTGATGGATGGGATCGATGGATGCNNGATCGGAAGAGCACACGTCTGAACTCCAGTCAC	rs12909503	A
TCCCTACACGACGCTCTTCCGATCTNNCAGGGCTGCAGAAGGAAGGACACAGGTGCTGGAGCTGGGGNNGATCGGAAGAGCACACGTCTGAACTCCAGTCAC	rs34065281	A
TCCCTACACGACGCTCTTCCGATCTNNCCGGGTGTCCACCCCTCCCAGCCTTGGAGCTAGGGATCTTNNGATCGGAAGAGCACACGTCTGAACTCCAGTCAC	rs34700358	A
TCCCTACACGACGCTCTTCCGATCTNNACCCAGGCTTGGGAGGTCAATCGGCAAAGCTGCTGTGTGTNNGATCGGAAGAGCACACGTCTGAACTCCAGTCAC	rs17279331	A
TCCCTACACGACGCTCTTCCGATCTNNTTCATCGTGTTAGCCAGGAAGATCTCAATCTCCTGACCTCNNGATCGGAAGAGCACACGTCTGAACTCCAGTCAC	rs77508548	A
TCCCTACACGACGCTCTTCCGATCTNNCATCGTGTTAGCCAGGACGATCTCAATCTCCTGACCTCGTNNGATCGGAAGAGCACACGTCTGAACTCCAGTCAC	rs79080775	A
TCCCTACACGACGCTCTTCCGATCTNNTCAGCAGCTTGAGACCAGCATGGCCAACATGATAAGCGGANNGATCGGAAGAGCACACGTCTGAACTCCAGTCAC	rs12906690	A
TCCCTACACGACGCTCTTCCGATCTNNCGAGACCAACCTGGGCAATATGGCAAAAACCCTTTCTCTANNGATCGGAAGAGCACACGTCTGAACTCCAGTCAC	rs12917469	A
TCCCTACACGACGCTCTTCCGATCTNNCAGGACCCAGGGAGGGAAGAGGCTGGTATCAAATGGGGATNNGATCGGAAGAGCACACGTCTGAACTCCAGTCAC	rs8033001	A
TCCCTACACGACGCTCTTCCGATCTNNACTCGCCAGCTTGTTCCCCATGCACCCTCTCAGTCACTTCNNGATCGGAAGAGCACACGTCTGAACTCCAGTCAC	rs34161654	A
TCCCTACACGACGCTCTTCCGATCTNNCCCAGGCCCTGCATGGGGCACTTCTCCCAGGGCAGTCAAGNNGATCGGAAGAGCACACGTCTGAACTCCAGTCAC	rs71402285	A
TCCCTACACGACGCTCTTCCGATCTNNGGTCATGGGGAGAGATGGAATGGAAAATATGGATGATATCNNGATCGGAAGAGCACACGTCTGAACTCCAGTCAC	rs67844713	A
TCCCTACACGACGCTCTTCCGATCTNNTTGGGCTACACTTTTTTGGAGGAGCTAGAACTAGAGTTCANNGATCGGAAGAGCACACGTCTGAACTCCAGTCAC	rs66732052	A
TCCCTACACGACGCTCTTCCGATCTNNCTGGTGAGAGCTCCTGAAGAGGTGTAGCCCCCAACTGGACNNGATCGGAAGAGCACACGTCTGAACTCCAGTCAC	rs1352836	A
TCCCTACACGACGCTCTTCCGATCTNNAATGAGTATCTTGGAACATATTCTGCTGATCACCTCAGGTNNGATCGGAAGAGCACACGTCTGAACTCCAGTCAC	rs1352834	A
TCCCTACACGACGCTCTTCCGATCTNNTGACTCTCAAGGGCCTGATAGAGCCCATCTCCATGATCGTNNGATCGGAAGAGCACACGTCTGAACTCCAGTCAC	rs33913544	A
TCCCTACACGACGCTCTTCCGATCTNNATGTAAGTTATTACCTCCAAAGGCCCTGGAAGAGCAAGACNNGATCGGAAGAGCACACGTCTGAACTCCAGTCAC	rs55921407	A
TCCCTACACGACGCTCTTCCGATCTNNCCCTGCCTCCCTCGCTGGCATTGCAGCAGTGCTGGAGTCTNNGATCGGAAGAGCACACGTCTGAACTCCAGTCAC	rs8023915	A
TCCCTACACGACGCTCTTCCGATCTNNGCTGGAATCACATCTGAAGACTCAACTTCCAAGTTCACTCNNGATCGGAAGAGCACACGTCTGAACTCCAGTCAC	rs72750316	A
TCCCTACACGACGCTCTTCCGATCTNNCTCAACTTCCAAGTTCACTAATGTGGTTGCTGCTAGGACTNNGATCGGAAGAGCACACGTCTGAACTCCAGTCAC	rs79191642	A
TCCCTACACGACGCTCTTCCGATCTNNTAGGTGATCCACCTGCCTCAGCCTCCCAAAGTGCTGGGATNNGATCGGAAGAGCACACGTCTGAACTCCAGTCAC	rs112259028	A
TCCCTACACGACGCTCTTCCGATCTNNCTGGGCGCCGTAGCTCATGACTGTAATCCCAGCACGTTGANNGATCGGAAGAGCACACGTCTGAACTCCAGTCAC	rs113257011	A
TCCCTACACGACGCTCTTCCGATCTNNTAGCCAGGCGTGGTGGTGCACGCCTGTAATCCCAGCTGCTNNGATCGGAAGAGCACACGTCTGAACTCCAGTCAC	rs12911382	A
TCCCTACACGACGCTCTTCCGATCTNNCTGGTCTTAAACTCCTGGGATCAAACAGTCCTCCCACTTTNNGATCGGAAGAGCACACGTCTGAACTCCAGTCAC	rs68024154	A
TCCCTACACGACGCTCTTCCGATCTNNGATTGCCTGAGGTTAAGAGATCAAGACCAGCCTGACCAACNNGATCGGAAGAGCACACGTCTGAACTCCAGTCAC	rs12898796	A
TCCCTACACGACGCTCTTCCGATCTNNCAATAGATACATTTGGTTTATTTGTTGTTGTTGTTTTGTTNNGATCGGAAGAGCACACGTCTGAACTCCAGTCAC	rs34613719	A
TCCCTACACGACGCTCTTCCGATCTNNATTCTTTGCTTCAGCCTCCAGAGTAGCTGGGATTACAGGCNNGATCGGAAGAGCACACGTCTGAACTCCAGTCAC	rs34700098	A
TCCCTACACGACGCTCTTCCGATCTNNCCAGACTGATCTTGAACTCATGACCTCGTGATCCACCCACNNGATCGGAAGAGCACACGTCTGAACTCCAGTCAC	rs35044293	A
TCCCTACACGACGCTCTTCCGATCTNNCCTCGTGATCCACCCACCTAGGCCTCCTAAAGTACTGGATNNGATCGGAAGAGCACACGTCTGAACTCCAGTCAC	rs111789763	A
TCCCTACACGACGCTCTTCCGATCTNNGTGGCATTTGCTGGTAAACAATAAAGGCAAGTTAGGGGCTNNGATCGGAAGAGCACACGTCTGAACTCCAGTCAC	rs4577028	A
TCCCTACACGACGCTCTTCCGATCTNNTCTACCTGAGTATGCATTTATTTTCACCTCTCAGCTCCTCNNGATCGGAAGAGCACACGTCTGAACTCCAGTCAC	rs12591598	A
TCCCTACACGACGCTCTTCCGATCTNNAACAACTACATGGGGAAGGAAAGTGTTTTGGGCTTTAAATNNGATCGGAAGAGCACACGTCTGAACTCCAGTCAC	rs12438959	A
TCCCTACACGACGCTCTTCCGATCTNNGTCAACATGGTGAAACTCCATCTCTACTAAAAATACAAAANNGATCGGAAGAGCACACGTCTGAACTCCAGTCAC	rs7178188	A
TCCCTACACGACGCTCTTCCGATCTNNTTTCAAGTTGCTCCAATATAGACCATATTCTATAGGTCATNNGATCGGAAGAGCACACGTCTGAACTCCAGTCAC	rs12442246	A
TCCCTACACGACGCTCTTCCGATCTNNTCGGAGCCTTGAATGCCCAACTAAGGACTTTGAAATTTGCNNGATCGGAAGAGCACACGTCTGAACTCCAGTCAC	rs9806513	A
TCCCTACACGACGCTCTTCCGATCTNNACTTCAGAGAGCAAGTTTTACATAGAAGTGAGGTGCCCAGNNGATCGGAAGAGCACACGTCTGAACTCCAGTCAC	rs921541	A
TCCCTACACGACGCTCTTCCGATCTNNCACAATAATTTTACAAAGCACCCCCTTTTACAGATAAGGANNGATCGGAAGAGCACACGTCTGAACTCCAGTCAC	rs4243035	A
TCCCTACACGACGCTCTTCCGATCTNNCTTGTACATGGATGTCACTACAAGCCTCATGGAAGCAGGCNNGATCGGAAGAGCACACGTCTGAACTCCAGTCAC	rs744618	A
TCCCTACACGACGCTCTTCCGATCTNNACACACCCCTCTTGTGCAGAAGCGGGTGGACCCTGTTTCCNNGATCGGAAGAGCACACGTCTGAACTCCAGTCAC	rs2290345	A
TCCCTACACGACGCTCTTCCGATCTNNCCAGGGGCCACTCCGTGCCACCTTGGGCTTGGGACACTGTNNGATCGGAAGAGCACACGTCTGAACTCCAGTCAC	rs35941327	A
TCCCTACACGACGCTCTTCCGATCTNNAGAAGAAAGCGATCAGCTTATGCTGAGTCACAGAGCAAACNNGATCGGAAGAGCACACGTCTGAACTCCAGTCAC	rs34207532	A
TCCCTACACGACGCTCTTCCGATCTNNGACTCCCCCACCCCCTGGGACCAGAGTATTTTAAAGCAAANNGATCGGAAGAGCACACGTCTGAACTCCAGTCAC	rs56895837	A
TCCCTACACGACGCTCTTCCGATCTNNGTGTTAGTCAGGATGGTCTAGATCGCCTGACCTCGTGATCNNGATCGGAAGAGCACACGTCTGAACTCCAGTCAC	rs12920477	A
TCCCTACACGACGCTCTTCCGATCTNNGATGGTCTCGATCGCCTGAACTCGTGATCCGCCCGCCTTGNNGATCGGAAGAGCACACGTCTGAACTCCAGTCAC	rs12920484	A
TCCCTACACGACGCTCTTCCGATCTNNCCTAGTGGAGATGAGACAAAAGACAGATGGACGGCTCCCANNGATCGGAAGAGCACACGTCTGAACTCCAGTCAC	rs35769936	A
TCCCTACACGACGCTCTTCCGATCTNNCCACCTCACGGAGTTTACAATCCAGGAAGGATGGCGCAAGNNGATCGGAAGAGCACACGTCTGAACTCCAGTCAC	rs34242559	A
TCCCTACACGACGCTCTTCCGATCTNNTGTTCCCCTAGTGATGCTGATGTACCCCTTTGCTGTGTCTNNGATCGGAAGAGCACACGTCTGAACTCCAGTCAC	rs35667589	A
TCCCTACACGACGCTCTTCCGATCTNNTGGCACAGACATGTCCAGGACTTACCTTTCATTTCTGATGNNGATCGGAAGAGCACACGTCTGAACTCCAGTCAC	rs35852981	A
TCCCTACACGACGCTCTTCCGATCTNNCCCTGATGTGTTCTGTGGAAAAATGACATCTTCCACCAAGNNGATCGGAAGAGCACACGTCTGAACTCCAGTCAC	rs66463064	A
TCCCTACACGACGCTCTTCCGATCTNNCTGAGTCCCAGCCCAAGGCAGGGGATGGCACCTTGAGAGCNNGATCGGAAGAGCACACGTCTGAACTCCAGTCAC	rs55991107	A
TCCCTACACGACGCTCTTCCGATCTNNGAGTCTACCATGAAGGCATAATTCTTTGCACACAGTAGATNNGATCGGAAGAGCACACGTCTGAACTCCAGTCAC	rs12103301	A
TCCCTACACGACGCTCTTCCGATCTNNAGGCATAATTCTTTGCACAAAGTAGATACTCAAAAAGTATNNGATCGGAAGAGCACACGTCTGAACTCCAGTCAC	rs12102728	A
TCCCTACACGACGCTCTTCCGATCTNNGATACTCAAAAAGTATGTGAGTGTATGCGTGTGTGCACATNNGATCGGAAGAGCACACGTCTGAACTCCAGTCAC	rs12102691	A
TCCCTACACGACGCTCTTCCGATCTNNCATGTGCATGTGTATGTACATGTCTGTGTGTCTCTCTGTGNNGATCGGAAGAGCACACGTCTGAACTCCAGTCAC	rs12103303	A
TCCCTACACGACGCTCTTCCGATCTNNCATGCATGTTGCATGTGTAAGTGTGTCTTCAGTTGATGAANNGATCGGAAGAGCACACGTCTGAACTCCAGTCAC	rs12102293	A
TCCCTACACGACGCTCTTCCGATCTNNGATGAATTTTGGCACCTCAAGTTGCCAGGCAACACAGGGCNNGATCGGAAGAGCACACGTCTGAACTCCAGTCAC	rs9929253	A
TCCCTACACGACGCTCTTCCGATCTNNGCAACACAGGGCTGCTGGGACTCAAGCCCCAGGCCTCACCNNGATCGGAAGAGCACACGTCTGAACTCCAGTCAC	rs9921666	A
TCCCTACACGACGCTCTTCCGATCTNNGTCAGAAGGCCGTCCTCCAAGGGCTGTGGGGAGGGAGTCANNGATCGGAAGAGCACACGTCTGAACTCCAGTCAC	rs9921748	A
TCCCTACACGACGCTCTTCCGATCTNNGACCCGGGGACGGGTGTTCAGAAAGATCTGAACAATCAGGNNGATCGGAAGAGCACACGTCTGAACTCCAGTCAC	rs9921827	A
TCCCTACACGACGCTCTTCCGATCTNNTGGGGAAAGGGAAGGAAGGAATCAAAGGGAGAGGCCACCGNNGATCGGAAGAGCACACGTCTGAACTCCAGTCAC	rs35424543	A
TCCCTACACGACGCTCTTCCGATCTNNTCAGCCCTTGGAAGTTCCCAACTGCTAAGAATGTCTTTGTNNGATCGGAAGAGCACACGTCTGAACTCCAGTCAC	rs9940095	A
TCCCTACACGACGCTCTTCCGATCTNNGGAAGTTCCCAACTGCTAAAAATGTCTTTGTTTCCCTAGGNNGATCGGAAGAGCACACGTCTGAACTCCAGTCAC	rs9929059	A
TCCCTACACGACGCTCTTCCGATCTNNGTCTTGGGTCACACCGGATAGTCTGTGCTAATGATGAGATNNGATCGGAAGAGCACACGTCTGAACTCCAGTCAC	rs9929066	A
TCCCTACACGACGCTCTTCCGATCTNNAGGTGGGGGCCTAGACCATATGATGTCAGCTTGACCTCTANNGATCGGAAGAGCACACGTCTGAACTCCAGTCAC	rs9940186	A
TCCCTACACGACGCTCTTCCGATCTNNTGTCAGCTTGACCTCTAGAAGGGCTGGAGGCGAAGGGCAGNNGATCGGAAGAGCACACGTCTGAACTCCAGTCAC	rs28395434	A
TCCCTACACGACGCTCTTCCGATCTNNCTGAGGTCAGGAGTTGGAGACCAGCCTGGCCAACATGGTGNNGATCGGAAGAGCACACGTCTGAACTCCAGTCAC	rs28709482	A
TCCCTACACGACGCTCTTCCGATCTNNGTTGCATTAAGCCGAGATCATACCACTGCATTTCAGTTTGNNGATCGGAAGAGCACACGTCTGAACTCCAGTCAC	rs8043592	A
TCCCTACACGACGCTCTTCCGATCTNNTCATACCACTGCATTTCAGATTGGATGACAAGAGCAAAACNNGATCGGAAGAGCACACGTCTGAACTCCAGTCAC	rs8048115	A
TCCCTACACGACGCTCTTCCGATCTNNGTGAGTCCCCCTGGTTGGCAATACTCCATGTGCACTGTCANNGATCGGAAGAGCACACGTCTGAACTCCAGTCAC	rs2317123	A
TCCCTACACGACGCTCTTCCGATCTNNTCTTTTGGTTTGTTTGTTTATTTTTTTTTTTTTTGAGATGNNGATCGGAAGAGCACACGTCTGAACTCCAGTCAC	rs2317122	A
TCCCTACACGACGCTCTTCCGATCTNNAGATGGAATTTTGCATTTTATTACCCAGGCTGGAGTGCAANNGATCGGAAGAGCACACGTCTGAACTCCAGTCAC	rs2317119	A
TCCCTACACGACGCTCTTCCGATCTNNTTACAGGCGTGAGCCACCGAGCCAGCTGTATCCTTTCACTNNGATCGGAAGAGCACACGTCTGAACTCCAGTCAC	rs4630561	A
TCCCTACACGACGCTCTTCCGATCTNNAAGCAGGAAGAGCGGCAGAAATTTGTTTCTAAGATTGTTCNNGATCGGAAGAGCACACGTCTGAACTCCAGTCAC	rs729265	A
TCCCTACACGACGCTCTTCCGATCTNNTTACAGGTGTGAGCCACCGAGCCTAGCCACATTTTTTTTTNNGATCGGAAGAGCACACGTCTGAACTCCAGTCAC	rs1806876	A
TCCCTACACGACGCTCTTCCGATCTNNGGAGTGCAGTGGCATGATCATGGCTTACTGCAACCTCTGCNNGATCGGAAGAGCACACGTCTGAACTCCAGTCAC	rs1075489	A
TCCCTACACGACGCTCTTCCGATCTNNTCAAGTGATTCTCCTGCCTAAGCCTCCCAAGTATCTGGGANNGATCGGAAGAGCACACGTCTGAACTCCAGTCAC	rs1075488	A
TCCCTACACGACGCTCTTCCGATCTNNAAGTATCTGGGACTACAGGAGTGAGCTATTTTTTTTTTTTNNGATCGGAAGAGCACACGTCTGAACTCCAGTCAC	rs1806875	A
TCCCTACACGACGCTCTTCCGATCTNNTACAGGCATGAGCCACCGTACCCGGCTCCCCCCCCAATTTNNGATCGGAAGAGCACACGTCTGAACTCCAGTCAC	rs2873368	A
TCCCTACACGACGCTCTTCCGATCTNNGGAAGTCAGATTAGAATTAAAGACGGCCCTCTTCCCAGCTNNGATCGGAAGAGCACACGTCTGAACTCCAGTCAC	rs7499792	A
TCCCTACACGACGCTCTTCCGATCTNNTTGTTCTTTGTACCTTAGAAGACTTGTCTGTAAATTGGGGNNGATCGGAAGAGCACACGTCTGAACTCCAGTCAC	rs2873367	A
TCCCTACACGACGCTCTTCCGATCTNNAGGAATAAAAGTGATGATTATGTAAAGCATTTGGGGCAGTNNGATCGGAAGAGCACACGTCTGAACTCCAGTCAC	rs4365300	A
TCCCTACACGACGCTCTTCCGATCTNNAAAAAAAAAAAAAAAAAAAACCCAGGCATGGCCAAGCACANNGATCGGAAGAGCACACGTCTGAACTCCAGTCAC	rs28579422	A
TCCCTACACGACGCTCTTCCGATCTNNTCCCAGGCATGGCCAAGCAAAGTGGCTCACACCTGTAACCNNGATCGGAAGAGCACACGTCTGAACTCCAGTCAC	rs55788414	A
TCCCTACACGACGCTCTTCCGATCTNNAACAGTTGGGCATGGTGGTATATGTCTACAGTTTCAGCTANNGATCGGAAGAGCACACGTCTGAACTCCAGTCAC	rs28514797	A
TCCCTACACGACGCTCTTCCGATCTNNGCATGGTGGTGTATGTCTAAAGTTTCAGCTACTCAGGAGGNNGATCGGAAGAGCACACGTCTGAACTCCAGTCAC	rs28697180	A
TCCCTACACGACGCTCTTCCGATCTNNTAGGAGGATCTCTTGAGAAAGTCGAGACCATCCTAGGCAANNGATCGGAAGAGCACACGTCTGAACTCCAGTCAC	rs67345347	A
TCCCTACACGACGCTCTTCCGATCTNNAAGAAAGTGAGGCATCGTGATGCATGCCTGCAGTCCCAGCNNGATCGGAAGAGCACACGTCTGAACTCCAGTCAC	rs34110030	A
TCCCTACACGACGCTCTTCCGATCTNNTTGACCCAGGGGGGTAGAGATTGCAGTGAGCTGTGATCGTNNGATCGGAAGAGCACACGTCTGAACTCCAGTCAC	rs35066366	A
TCCCTACACGACGCTCTTCCGATCTNNGCACTCCAGCCTGGGTGGCAGAACAAGACCTTATCTTAAANNGATCGGAAGAGCACACGTCTGAACTCCAGTCAC	rs11649028	A
TCCCTACACGACGCTCTTCCGATCTNNTCCGTGGCCACAGGAAACAACTTATCGAGGACGCAATCTCNNGATCGGAAGAGCACACGTCTGAACTCCAGTCAC	rs34444956	A
TCCCTACACGACGCTCTTCCGATCTNNCCACAGGAAACACCTTATCAAGGACGCAATCTCCAACATTNNGATCGGAAGAGCACACGTCTGAACTCCAGTCAC	rs57461213	A
TCCCTACACGACGCTCTTCCGATCTNNTGGTGCCTTAATTAAAATTAGCGTCACATAAGGAGGTCAGNNGATCGGAAGAGCACACGTCTGAACTCCAGTCAC	rs59201365	A
TCCCTACACGACGCTCTTCCGATCTNNTGCCTTAATTAAAATTCGCATCACATAAGGAGGTCAGCTANNGATCGGAAGAGCACACGTCTGAACTCCAGTCAC	rs8059559	A
TCCCTACACGACGCTCTTCCGATCTNNCACCAAGCTCAGGGCCAGCATCCAGGCATGAGCAAGTAAANNGATCGGAAGAGCACACGTCTGAACTCCAGTCAC	rs77907709	A
TCCCTACACGACGCTCTTCCGATCTNNGCAAGTAAAGCCAAATTGTATAAAGTGTGCATGTTCAGGCNNGATCGGAAGAGCACACGTCTGAACTCCAGTCAC	rs12103358	A
TCCCTACACGACGCTCTTCCGATCTNNAGAACATGGTCCTCTCTTGAGTTTCTTTCTTTCTTTTTTTNNGATCGGAAGAGCACACGTCTGAACTCCAGTCAC	rs12103403	A
TCCCTACACGACGCTCTTCCGATCTNNTCAGGTGATCCACCCACCTAGGCCTCCCAAAGTGCTGGGANNGATCGGAAGAGCACACGTCTGAACTCCAGTCAC	rs5017515	A
TCCCTACACGACGCTCTTCCGATCTNNAGGCGTGAGCCACCGCGCCAGGCCTCCTCTCTTGCGTTTCNNGATCGGAAGAGCACACGTCTGAACTCCAGTCAC	rs12102958	A
TCCCTACACGACGCTCTTCCGATCTNNTCTAACCAAAGAATCACCGACTATCTTGGGCTGAGGACTTNNGATCGGAAGAGCACACGTCTGAACTCCAGTCAC	rs12716908	A
TCCCTACACGACGCTCTTCCGATCTNNGTGGCTCACGTCTGCAATTACAGCACTTTGGGAGGCCAAGNNGATCGGAAGAGCACACGTCTGAACTCCAGTCAC	rs28583467	A
TCCCTACACGACGCTCTTCCGATCTNNCTGCAATTGCAGCACTTTGAGAGGCCAAGGTGGGCAGATCNNGATCGGAAGAGCACACGTCTGAACTCCAGTCAC	rs28720993	A
TCCCTACACGACGCTCTTCCGATCTNNGCAGATCACTTGAGGTCAGAAGTTTGAAACCAGCCTGGCCNNGATCGGAAGAGCACACGTCTGAACTCCAGTCAC	rs28757743	A
TCCCTACACGACGCTCTTCCGATCTNNCCATGTGCCCATAAGAATTAACAAAAATTTTTAAAGAGTTNNGATCGGAAGAGCACACGTCTGAACTCCAGTCAC	rs7185658	A
TCCCTACACGACGCTCTTCCGATCTNNTAATATTATTTGAAAACAAAGGAGTTTTCTCCAGGACGGTNNGATCGGAAGAGCACACGTCTGAACTCCAGTCAC	rs35326835	A
TCCCTACACGACGCTCTTCCGATCTNNAACGGTGTTCGCTTTGAAGAGTGCACACTCTGCTGGGGTGNNGATCGGAAGAGCACACGTCTGAACTCCAGTCAC	rs9936302	A
TCCCTACACGACGCTCTTCCGATCTNNAGATAACATATCCCAATAGACCCCTTAGCCCTTTGCTGACNNGATCGGAAGAGCACACGTCTGAACTCCAGTCAC	rs6565018	A
TCCCTACACGACGCTCTTCCGATCTNNGATGGTGTGTTAGTTTTCTATTGTTGCCATAACAAGTTACNNGATCGGAAGAGCACACGTCTGAACTCCAGTCAC	rs34690715	A
TCCCTACACGACGCTCTTCCGATCTNNAATTTAGGTATGCATTCCTACAAATTTACCTAAGATACCANNGATCGGAAGAGCACACGTCTGAACTCCAGTCAC	rs2317971	A
TCCCTACACGACGCTCTTCCGATCTNNTGAAGCAGACGGGAATAGGAGTGTTGGATTGATGTCCATGNNGATCGGAAGAGCACACGTCTGAACTCCAGTCAC	rs12927083	A
TCCCTACACGACGCTCTTCCGATCTNNGATCCTTTCAGAGCCTCCAAGTGTCGTTGGTGTCTTACAGNNGATCGGAAGAGCACACGTCTGAACTCCAGTCAC	rs7199749	A
TCCCTACACGACGCTCTTCCGATCTNNCTTCAGCCACAGTTACAGAAGTGGAAGTTGCACTTACCCTNNGATCGGAAGAGCACACGTCTGAACTCCAGTCAC	rs35850830	A
TCCCTACACGACGCTCTTCCGATCTNNATATAGTCCCCGTCACAACAACTCACTCTGCTATTGTAGGNNGATCGGAAGAGCACACGTCTGAACTCCAGTCAC	rs8062866	A
TCCCTACACGACGCTCTTCCGATCTNNTAGAATGACATTTGGGTAAACAATAAGATTAAGACAGAAANNGATCGGAAGAGCACACGTCTGAACTCCAGTCAC	rs1073329	A
TCCCTACACGACGCTCTTCCGATCTNNAGGATGGTTCAACATTCACAAATCAATAAATGCAATTCACNNGATCGGAAGAGCACACGTCTGAACTCCAGTCAC	rs62039978	A
TCCCTACACGACGCTCTTCCGATCTNNGATTGTATACCTGGAATACAGTGACTCCTTCAGAAGACTCNNGATCGGAAGAGCACACGTCTGAACTCCAGTCAC	rs7197080	A
TCCCTACACGACGCTCTTCCGATCTNNCATAATATTTCTTTACTATACTTTGATTATATTTAGATCTNNGATCGGAAGAGCACACGTCTGAACTCCAGTCAC	rs4782623	A
TCCCTACACGACGCTCTTCCGATCTNNCTTAGTTCTCTTTCTGTGCATCCTTTTCTCTGGAACTCAGNNGATCGGAAGAGCACACGTCTGAACTCCAGTCAC	rs7190181	A
TCCCTACACGACGCTCTTCCGATCTNNATCTTGGCAGATTAGGTATATGGCAAGGACCTTCTGTCTGNNGATCGGAAGAGCACACGTCTGAACTCCAGTCAC	rs57628137	A
TCCCTACACGACGCTCTTCCGATCTNNCAGAGAAGGAAACTGGAGAAAGAACAGATTAAGGACTTGCNNGATCGGAAGAGCACACGTCTGAACTCCAGTCAC	rs12933781	A
TCCCTACACGACGCTCTTCCGATCTNNTCAAGGCCTCCTGGACTCCAATACATGTGTAAGAGAGATGNNGATCGGAAGAGCACACGTCTGAACTCCAGTCAC	rs12716944	A
TCCCTACACGACGCTCTTCCGATCTNNGCAAGTCCTTAATCTGTTTATTCTCCAGTTTCCTTCTCTGNNGATCGGAAGAGCACACGTCTGAACTCCAGTCAC	rs9888972	A
TCCCTACACGACGCTCTTCCGATCTNNTAACCAAATACCACCTGTTACCCAAAAACCTACGGAAATANNGATCGGAAGAGCACACGTCTGAACTCCAGTCAC	rs7192566	A
TCCCTACACGACGCTCTTCCGATCTNNCTGGTAGGTTCATGGTCTCACTGGCTCAGGAGTGAAGCTGNNGATCGGAAGAGCACACGTCTGAACTCCAGTCAC	rs7212330	A
TCCCTACACGACGCTCTTCCGATCTNNGCGCTGGTCGGGGAGGCTCAGGCCGCACAGGAGCCCACGGNNGATCGGAAGAGCACACGTCTGAACTCCAGTCAC	rs113736768	A
TCCCTACACGACGCTCTTCCGATCTNNTTCTCTTTTCCCCTCTACCAAAGGCCACAGTATCTCAGACNNGATCGGAAGAGCACACGTCTGAACTCCAGTCAC	rs36040276	A
TCCCTACACGACGCTCTTCCGATCTNNTATCATAGATGTCCTCCCAATTTCTTTATTTATTCAGGAANNGATCGGAAGAGCACACGTCTGAACTCCAGTCAC	rs9913953	A
TCCCTACACGACGCTCTTCCGATCTNNATTGCAAATTGGAAGCAAAATATGAAGGTGGGAGCTATACNNGATCGGAAGAGCACACGTCTGAACTCCAGTCAC	rs34970193	A
TCCCTACACGACGCTCTTCCGATCTNNTTTTCCATAGTTGATTATAACCTATTTCATGATTCAAAGTNNGATCGGAAGAGCACACGTCTGAACTCCAGTCAC	rs4792127	A
TCCCTACACGACGCTCTTCCGATCTNNATCTCCTAACCTAGTGACTAGCCCACCTCGGCCTCCCAAANNGATCGGAAGAGCACACGTCTGAACTCCAGTCAC	rs35302734	A
TCCCTACACGACGCTCTTCCGATCTNNAGATATAATTATTTTAATTATTTTTGTTAACTTTTTTTATNNGATCGGAAGAGCACACGTCTGAACTCCAGTCAC	rs2108975	A
TCCCTACACGACGCTCTTCCGATCTNNTGAGTGTAATTCAGGGTGGAAAATGTGATACCAGACAGATNNGATCGGAAGAGCACACGTCTGAACTCCAGTCAC	rs12942682	A
TCCCTACACGACGCTCTTCCGATCTNNTAGGGTTAATGGAGATATAAGATTTTAGCTATATGTATCGNNGATCGGAAGAGCACACGTCTGAACTCCAGTCAC	rs12943640	A
TCCCTACACGACGCTCTTCCGATCTNNTCTCTGTCACAGGGCTGGTATGGCCATAGGCCCTGACTCTNNGATCGGAAGAGCACACGTCTGAACTCCAGTCAC	rs11650428	A
TCCCTACACGACGCTCTTCCGATCTNNAACTCTTCCCTACTAAGCCAGCTGTCTGTTTGTAGACAGCNNGATCGGAAGAGCACACGTCTGAACTCCAGTCAC	rs12150130	A
TCCCTACACGACGCTCTTCCGATCTNNGCAGGTGTGAGGTCTCACTAGTTCATACTCCGGCATCACANNGATCGGAAGAGCACACGTCTGAACTCCAGTCAC	rs140411637	A
TCCCTACACGACGCTCTTCCGATCTNNAGTCTGTTGCCAAAGGCCTAAGAGCCCCTGGCTGACCACTNNGATCGGAAGAGCACACGTCTGAACTCCAGTCAC	rs138741144	A
TCCCTACACGACGCTCTTCCGATCTNNATTTCAAAAAGCCCACCTGATTGCCTTGCTGGGTAGCATANNGATCGGAAGAGCACACGTCTGAACTCCAGTCAC	rs181298223	A
TCCCTACACGACGCTCTTCCGATCTNNGGTTTTGCCATTTTGGCCAAGCTGGTCTCAAACTCCTGGGNNGATCGGAAGAGCACACGTCTGAACTCCAGTCAC	rs56171387	A
TCCCTACACGACGCTCTTCCGATCTNNCCCTGTATCTCAGCGTCTTAAGACCTCTGACAGAGCGACGNNGATCGGAAGAGCACACGTCTGAACTCCAGTCAC	rs60487483	A
TCCCTACACGACGCTCTTCCGATCTNNTTTTTGAGATAGAGTCTCGATCTGTTGCCCAGGCTGGAGTNNGATCGGAAGAGCACACGTCTGAACTCCAGTCAC	rs140389080	A
TCCCTACACGACGCTCTTCCGATCTNNGGCTACAGTGAGCTATGATAACGCCACTGCACTCCAGCCTNNGATCGGAAGAGCACACGTCTGAACTCCAGTCAC	rs112592594	A
TCCCTACACGACGCTCTTCCGATCTNNTTGAAGGATCAATATGTATATGTCCTTTGATATTTGCTAANNGATCGGAAGAGCACACGTCTGAACTCCAGTCAC	rs73365837	A
TCCCTACACGACGCTCTTCCGATCTNNTTAAGCATGGACATTGCCTATATTTTTCTTTCTTGGCAATNNGATCGGAAGAGCACACGTCTGAACTCCAGTCAC	rs11876511	A
TCCCTACACGACGCTCTTCCGATCTNNAAAGTGAGACTCTGTCTCAAAAAAAATAAAAAGGAGGGGANNGATCGGAAGAGCACACGTCTGAACTCCAGTCAC	rs80114931	A
TCCCTACACGACGCTCTTCCGATCTNNAATCCTTTTAGTCCACATAAAATTGTTTTTATTTTAAGAANNGATCGGAAGAGCACACGTCTGAACTCCAGTCAC	rs76979575	A
TCCCTACACGACGCTCTTCCGATCTNNAGTTAGATCAAACTTCTTTATTCTCACCTTGCTAAGAATANNGATCGGAAGAGCACACGTCTGAACTCCAGTCAC	rs55883908	A
TCCCTACACGACGCTCTTCCGATCTNNTTGACAAACACATTTTGTCAAAAAAAAATCTTGTCTTTTGNNGATCGGAAGAGCACACGTCTGAACTCCAGTCAC	rs11872184	A
TCCCTACACGACGCTCTTCCGATCTNNTCATTAATATGATGTGTTAAGCATTATTCTAAGTAATAGANNGATCGGAAGAGCACACGTCTGAACTCCAGTCAC	rs8092183	A
TCCCTACACGACGCTCTTCCGATCTNNTTCTGAACACTAAGTGATAACCCCTGTCTTTCTCAATGTANNGATCGGAAGAGCACACGTCTGAACTCCAGTCAC	rs59023685	A
TCCCTACACGACGCTCTTCCGATCTNNTCCTTAGTAGCTAGGACTAAAGATGTGTGCCACCACACCCNNGATCGGAAGAGCACACGTCTGAACTCCAGTCAC	rs79018653	A
TCCCTACACGACGCTCTTCCGATCTNNAAGCTTCCACTTTCCTAAAATACAAGTAAAATACAGAATGNNGATCGGAAGAGCACACGTCTGAACTCCAGTCAC	rs8098934	A
TCCCTACACGACGCTCTTCCGATCTNNCTACGAAATTGTCTAAGACACAAAACAGTGTCTGTTAGGANNGATCGGAAGAGCACACGTCTGAACTCCAGTCAC	rs8086632	A
TCCCTACACGACGCTCTTCCGATCTNNGATAACAGCCTTTCAGATAAACTTTCCATCCTTTTGTGGTNNGATCGGAAGAGCACACGTCTGAACTCCAGTCAC	rs16943788	A
TCCCTACACGACGCTCTTCCGATCTNNTCTATATTTTCACAGTTGGATTTATCTAAGGATATTTCTCNNGATCGGAAGAGCACACGTCTGAACTCCAGTCAC	rs73367820	A
TCCCTACACGACGCTCTTCCGATCTNNGGCCGGTCACGGTGGCTCAAGCCTGTAATCCTAGCACTTTNNGATCGGAAGAGCACACGTCTGAACTCCAGTCAC	rs13408288	A
TCCCTACACGACGCTCTTCCGATCTNNCACACGCCTGTAATCTCAGATACTTGGGAGGCTGAGGCAGNNGATCGGAAGAGCACACGTCTGAACTCCAGTCAC	rs13408414	A
TCCCTACACGACGCTCTTCCGATCTNNTTGGGAGGCTGAGGCAGGAAAATTGCTTGAACCTGGGAGGNNGATCGGAAGAGCACACGTCTGAACTCCAGTCAC	rs13382273	A
TCCCTACACGACGCTCTTCCGATCTNNAAATATCACATTTATTGTTACATTAAATGTAACAATCAAANNGATCGGAAGAGCACACGTCTGAACTCCAGTCAC	rs6542624	A
TCCCTACACGACGCTCTTCCGATCTNNATATTTTCCCAGGTATGTGACCTAGGGAAAATTTCACAAANNGATCGGAAGAGCACACGTCTGAACTCCAGTCAC	rs6542627	A
TCCCTACACGACGCTCTTCCGATCTNNGACATTCTAAAGATGAGAAAGAACAGGCTAACAACAAATGNNGATCGGAAGAGCACACGTCTGAACTCCAGTCAC	rs17582650	A
TCCCTACACGACGCTCTTCCGATCTNNTAAATGGGAAGAAACACTGAAGAACTCTATGAGATCTGGANNGATCGGAAGAGCACACGTCTGAACTCCAGTCAC	rs10173724	A
TCCCTACACGACGCTCTTCCGATCTNNTCTGGAGGACAGTGGCCCTATTCTCACAGTTTCACCAAGCNNGATCGGAAGAGCACACGTCTGAACTCCAGTCAC	rs62118544	A
TCCCTACACGACGCTCTTCCGATCTNNTTGCACAGCTTTAATAAAAAGATTTAAGATGCAAGAAGTGNNGATCGGAAGAGCACACGTCTGAACTCCAGTCAC	rs17019997	A
TCCCTACACGACGCTCTTCCGATCTNNAATTTAAAAATATTTCACTAATGTATGAATGTGTTTTCTANNGATCGGAAGAGCACACGTCTGAACTCCAGTCAC	rs6542633	A
TCCCTACACGACGCTCTTCCGATCTNNCTCTTCTTTTCTACCCTTCAGATGCGGCATAGACAAATTTNNGATCGGAAGAGCACACGTCTGAACTCCAGTCAC	rs7569982	A
TCCCTACACGACGCTCTTCCGATCTNNCTGGCCCAAAGTATGCACTAAACAACGATTTCTTGAATGANNGATCGGAAGAGCACACGTCTGAACTCCAGTCAC	rs57527611	A
TCCCTACACGACGCTCTTCCGATCTNNTCTTAGAGAGGTGAGGAAGAGGCAGAAGAAATGTTTGAAGNNGATCGGAAGAGCACACGTCTGAACTCCAGTCAC	rs13400849	A
TCCCTACACGACGCTCTTCCGATCTNNTAGGCAAATTCTTAGAAAGAACTTTTACACTAGTGATAATNNGATCGGAAGAGCACACGTCTGAACTCCAGTCAC	rs13427718	A
TCCCTACACGACGCTCTTCCGATCTNNTTGATAAAACTATCTTTATAATAAGAATTTAATTTACTTANNGATCGGAAGAGCACACGTCTGAACTCCAGTCAC	rs62118551	A
TCCCTACACGACGCTCTTCCGATCTNNTGGTTATTAAGTTATTTATACATCTCATGTATATATCTTANNGATCGGAAGAGCACACGTCTGAACTCCAGTCAC	rs6756024	A
TCCCTACACGACGCTCTTCCGATCTNNTGTACGACATGGTGGCTACAGTCAACAATGCTGCAGTGTANNGATCGGAAGAGCACACGTCTGAACTCCAGTCAC	rs13427627	A
TCCCTACACGACGCTCTTCCGATCTNNGTGGGTCTGAGATCTGGACATGGAGTTGAGAGGGAGAGTANNGATCGGAAGAGCACACGTCTGAACTCCAGTCAC	rs62120868	A
TCCCTACACGACGCTCTTCCGATCTNNGGCAGCCCTCAGCTGCAGAAATCTGTTTCCCTGAAGCTTTNNGATCGGAAGAGCACACGTCTGAACTCCAGTCAC	rs6542636	A
TCCCTACACGACGCTCTTCCGATCTNNAATCAAAGAATATACTATAAAGAGAGCCATTCTGCTTGAANNGATCGGAAGAGCACACGTCTGAACTCCAGTCAC	rs13389472	A
TCCCTACACGACGCTCTTCCGATCTNNATGTGGTTAAAAAGTTAAAAGCTGCAGCCAAGCATGATGGNNGATCGGAAGAGCACACGTCTGAACTCCAGTCAC	rs6754367	A
TCCCTACACGACGCTCTTCCGATCTNNTTAAATGCTGCAGCCAAGCATGATGGCTCATGCCTGGAATNNGATCGGAAGAGCACACGTCTGAACTCCAGTCAC	rs13386955	A
TCCCTACACGACGCTCTTCCGATCTNNGTTCAAGACCAGCCAGGCTAACATGGTGAAAACCCTTCTGNNGATCGGAAGAGCACACGTCTGAACTCCAGTCAC	rs6709962	A
TCCCTACACGACGCTCTTCCGATCTNNGTTTAGTTGTGATGTTAGAACCATATAAAAACCAAAACTANNGATCGGAAGAGCACACGTCTGAACTCCAGTCAC	rs6754512	A
TCCCTACACGACGCTCTTCCGATCTNNGGGTATGGATCCTATTACCAAGGCACTAAGCATAGTACCCNNGATCGGAAGAGCACACGTCTGAACTCCAGTCAC	rs4971486	A
TCCCTACACGACGCTCTTCCGATCTNNAAGTTAAGACTGATGCTACACACACAGTGAGTGAGAAGGANNGATCGGAAGAGCACACGTCTGAACTCCAGTCAC	rs13384087	A
TCCCTACACGACGCTCTTCCGATCTNNCCCAACCTGATCTGAAGTGAGTTGAGTAGAGGACAGCCAANNGATCGGAAGAGCACACGTCTGAACTCCAGTCAC	rs13408883	A
TCCCTACACGACGCTCTTCCGATCTNNGTAATTTACAAAGAAAAGAAGTTTAACTGACTTGCAATTCNNGATCGGAAGAGCACACGTCTGAACTCCAGTCAC	rs6542639	A
TCCCTACACGACGCTCTTCCGATCTNNTACCAGAACAGCACCGTGTAGTATTCAACATTTAGAGGAANNGATCGGAAGAGCACACGTCTGAACTCCAGTCAC	rs7600533	A
TCCCTACACGACGCTCTTCCGATCTNNACAAAAGTGGGCAAAACACATGAGGCAACTCTATTCAGACNNGATCGGAAGAGCACACGTCTGAACTCCAGTCAC	rs7573370	A
TCCCTACACGACGCTCTTCCGATCTNNGCAGGAGAGACCGGCTATTAATGTGGATACACATTGTCTTNNGATCGGAAGAGCACACGTCTGAACTCCAGTCAC	rs13415838	A
TCCCTACACGACGCTCTTCCGATCTNNATGTGCTCTCTTCAACCACAGGACTCTGTTCTACACTCAANNGATCGGAAGAGCACACGTCTGAACTCCAGTCAC	rs13407048	A
TCCCTACACGACGCTCTTCCGATCTNNGTAATTCAGTAGAGAAATAAGTTGGTGTCACAAAAATTGANNGATCGGAAGAGCACACGTCTGAACTCCAGTCAC	rs10173216	A
TCCCTACACGACGCTCTTCCGATCTNNCCTACAATATAATTCAATTAATATGAAAATCTGCAAAATCNNGATCGGAAGAGCACACGTCTGAACTCCAGTCAC	rs13383006	A
TCCCTACACGACGCTCTTCCGATCTNNAAGTATTGTATAGACGTCTATTAGTTGTAGTTGTTTTATANNGATCGGAAGAGCACACGTCTGAACTCCAGTCAC	rs10187271	A
TCCCTACACGACGCTCTTCCGATCTNNTCATTCTTTAACTTTCAGCATATTTGTTTATCTGAGTCTANNGATCGGAAGAGCACACGTCTGAACTCCAGTCAC	rs6542641	A
TCCCTACACGACGCTCTTCCGATCTNNTTTCTCAATGATTTTTATAACCATCTTAGATGATATTTGCNNGATCGGAAGAGCACACGTCTGAACTCCAGTCAC	rs6720301	A
TCCCTACACGACGCTCTTCCGATCTNNTTCTACTTCAAAAATGATGAGGAAAATCAACTACAATTCTNNGATCGGAAGAGCACACGTCTGAACTCCAGTCAC	rs13410276	A
TCCCTACACGACGCTCTTCCGATCTNNAACTACAATTCTATTAGAAATATTACCAGAGTTCAGTAAGNNGATCGGAAGAGCACACGTCTGAACTCCAGTCAC	rs10193134	A
TCCCTACACGACGCTCTTCCGATCTNNAACTTAAAATGCTAAGGGGAATTTTTAGAAACTTGAGTAANNGATCGGAAGAGCACACGTCTGAACTCCAGTCAC	rs7557773	A
TCCCTACACGACGCTCTTCCGATCTNNACTCACTCAAACATGCCTAAACTCACACACGCACTCACACNNGATCGGAAGAGCACACGTCTGAACTCCAGTCAC	rs13404900	A
TCCCTACACGACGCTCTTCCGATCTNNCACACACGCACTCACACACATTCACATACAAACATCTCCGNNGATCGGAAGAGCACACGTCTGAACTCCAGTCAC	rs6742017	A
TCCCTACACGACGCTCTTCCGATCTNNAAAGGGCTGAATGTGACAGAAACTCACATTCACCATCCTTNNGATCGGAAGAGCACACGTCTGAACTCCAGTCAC	rs6714608	A
TCCCTACACGACGCTCTTCCGATCTNNGCTCCATAAATGCATTAGAAAATTAAGAATAAAGGAAAGANNGATCGGAAGAGCACACGTCTGAACTCCAGTCAC	rs6732610	A
TCCCTACACGACGCTCTTCCGATCTNNTTAAGAATAAAGGAAAGAAAAAACGTTTGCTTTGGGCCCANNGATCGGAAGAGCACACGTCTGAACTCCAGTCAC	rs6735561	A
TCCCTACACGACGCTCTTCCGATCTNNGAATAAAGGAAAGAATAAAAGTTTGCTTTGGGCCCAAATTNNGATCGGAAGAGCACACGTCTGAACTCCAGTCAC	rs6717844	A
TCCCTACACGACGCTCTTCCGATCTNNTCGTTGAAACACTAAGGTTAATGAAGGAGTAAATCATGGANNGATCGGAAGAGCACACGTCTGAACTCCAGTCAC	rs6745523	A
TCCCTACACGACGCTCTTCCGATCTNNATTTTTGGTTCCGGTGGTAATGGTCATACTGGTGGTGCTANNGATCGGAAGAGCACACGTCTGAACTCCAGTCAC	rs6732954	A
TCCCTACACGACGCTCTTCCGATCTNNATTCATACAAACATCTGTCATGAAAAATCCTGCCTGAGATNNGATCGGAAGAGCACACGTCTGAACTCCAGTCAC	rs10164527	A
TCCCTACACGACGCTCTTCCGATCTNNAACGTATTTCTAAATTATCATATTAAATGGTGGTGGGGTTNNGATCGGAAGAGCACACGTCTGAACTCCAGTCAC	rs10164620	A
TCCCTACACGACGCTCTTCCGATCTNNCCATCAAGTCATGCAAGAAACTTTGCTCCTACTCAAATCGNNGATCGGAAGAGCACACGTCTGAACTCCAGTCAC	rs10173912	A
TCCCTACACGACGCTCTTCCGATCTNNGAACCTTTGCTCCTACTCAAATCGAATTTGAGATAAGCTANNGATCGGAAGAGCACACGTCTGAACTCCAGTCAC	rs10186057	A
TCCCTACACGACGCTCTTCCGATCTNNCGAATTTGAGATAAGCTACAAAATGGATTCTCTCTCAAAANNGATCGGAAGAGCACACGTCTGAACTCCAGTCAC	rs59060130	A
TCCCTACACGACGCTCTTCCGATCTNNGATTCTCTCTCAAAACCCTAAAATAAAAATTTTAAGCAAANNGATCGGAAGAGCACACGTCTGAACTCCAGTCAC	rs73912711	A
TCCCTACACGACGCTCTTCCGATCTNNCTCAAAACCCTGAAATAAAAATTTTAAGCAAAAATAAAATNNGATCGGAAGAGCACACGTCTGAACTCCAGTCAC	rs73912712	A
TCCCTACACGACGCTCTTCCGATCTNNGGCTCACCAAAAATGAACAATTCACATTCTAAAATTCATCNNGATCGGAAGAGCACACGTCTGAACTCCAGTCAC	rs61302035	A
TCCCTACACGACGCTCTTCCGATCTNNAGTGAGTGGCAGTCCTTCCAACCAAGGACTTACTTCGTGANNGATCGGAAGAGCACACGTCTGAACTCCAGTCAC	rs60940020	A
TCCCTACACGACGCTCTTCCGATCTNNTCATTATTATCTCATTACCACTCATAAGCTCACCTTGTGTNNGATCGGAAGAGCACACGTCTGAACTCCAGTCAC	rs60677252	A
TCCCTACACGACGCTCTTCCGATCTNNGGTAGTCATGTGATGAGACACATCTGAGTGCACCAGAGCANNGATCGGAAGAGCACACGTCTGAACTCCAGTCAC	rs56410614	A
TCCCTACACGACGCTCTTCCGATCTNNTGTCCTGGGGCCACTGAGAACTTTGTAATTTAGGAAACACNNGATCGGAAGAGCACACGTCTGAACTCCAGTCAC	rs1371475	A
TCCCTACACGACGCTCTTCCGATCTNNATTGCTCATAACATCCTGGAAAGTTGACTCATTTGGAAAANNGATCGGAAGAGCACACGTCTGAACTCCAGTCAC	rs1371476	A
TCCCTACACGACGCTCTTCCGATCTNNTAGGGTTCACCTGAGAGGAAGTTCAATCAAAGAGCTGATTNNGATCGGAAGAGCACACGTCTGAACTCCAGTCAC	rs1371477	A
TCCCTACACGACGCTCTTCCGATCTNNTCTCAGGTGGCACAGAAGAATTCTTGTGCATATACCGCATNNGATCGGAAGAGCACACGTCTGAACTCCAGTCAC	rs56003703	A
TCCCTACACGACGCTCTTCCGATCTNNTTTGAGTATATTCTCTGTCACTTCTCCCTGTAAGGTATTTNNGATCGGAAGAGCACACGTCTGAACTCCAGTCAC	rs62108777	A
TCCCTACACGACGCTCTTCCGATCTNNTCATTGCACCTCTCCCTGGAAGTAAGAGGCAAAATCGCACNNGATCGGAAGAGCACACGTCTGAACTCCAGTCAC	rs7578973	A
TCCCTACACGACGCTCTTCCGATCTNNCAAATGTCATCTCTGTACCACAGGGCACCACCGGGCACGGNNGATCGGAAGAGCACACGTCTGAACTCCAGTCAC	rs57469282	A
TCCCTACACGACGCTCTTCCGATCTNNTAGAATGACTACCCACAGAATTACTTATCTGTACAATACCNNGATCGGAAGAGCACACGTCTGAACTCCAGTCAC	rs62108782	A
TCCCTACACGACGCTCTTCCGATCTNNTAACTTATACTGAGAATGGATCTGAGGTTTTGCAATGTATNNGATCGGAAGAGCACACGTCTGAACTCCAGTCAC	rs56264320	A
TCCCTACACGACGCTCTTCCGATCTNNTCTGCCCCCAAGGATCTCAATAAAGTGAGAAATGGACATANNGATCGGAAGAGCACACGTCTGAACTCCAGTCAC	rs55983965	A
TCCCTACACGACGCTCTTCCGATCTNNATATATGTAATATATAAACATACATTATATTATATTATATNNGATCGGAAGAGCACACGTCTGAACTCCAGTCAC	rs10202733	A
TCCCTACACGACGCTCTTCCGATCTNNATATTATATATAATATATAAACATTATATAATATATAGTANNGATCGGAAGAGCACACGTCTGAACTCCAGTCAC	rs10190731	A
TCCCTACACGACGCTCTTCCGATCTNNCAATTATATTATATATAATAATATATAATATAATTATATANNGATCGGAAGAGCACACGTCTGAACTCCAGTCAC	rs10205337	A
TCCCTACACGACGCTCTTCCGATCTNNATACATACATTTAAAATTGATAAACTCTACAGTTCAGACANNGATCGGAAGAGCACACGTCTGAACTCCAGTCAC	rs62108785	A
TCCCTACACGACGCTCTTCCGATCTNNAGAAAGGTGGCTGGGGAAAAGCTCTGCTTGTGTTGAAAGTNNGATCGGAAGAGCACACGTCTGAACTCCAGTCAC	rs60626348	A
TCCCTACACGACGCTCTTCCGATCTNNATTCATTTTAACTTCTCTCATGAGGATTAAGGAGCTCCTCNNGATCGGAAGAGCACACGTCTGAACTCCAGTCAC	rs60000838	A
TCCCTACACGACGCTCTTCCGATCTNNCCCAGCATCACATGGCTGTAAGCATTTCACAAATTGCATTNNGATCGGAAGAGCACACGTCTGAACTCCAGTCAC	rs62108788	A
TCCCTACACGACGCTCTTCCGATCTNNCTGAATACTGTGCATAACTACTGGTATCCTGGCATCCTAGNNGATCGGAAGAGCACACGTCTGAACTCCAGTCAC	rs56957745	A
TCCCTACACGACGCTCTTCCGATCTNNTTGGCACATAATAGGTTGTAAAAAAAATAGTTGCTGAGTCNNGATCGGAAGAGCACACGTCTGAACTCCAGTCAC	rs1561544	A
TCCCTACACGACGCTCTTCCGATCTNNACTATTGGGTACTAGGCTTAGTATCTGGTTGAGGAAATTANNGATCGGAAGAGCACACGTCTGAACTCCAGTCAC	rs997944	A
TCCCTACACGACGCTCTTCCGATCTNNGTTCTAGACGGAATGCTTGACAGAAATACCAGGATAATTTNNGATCGGAAGAGCACACGTCTGAACTCCAGTCAC	rs1439828	A
TCCCTACACGACGCTCTTCCGATCTNNAATAAATTATTGTGGCCTTATTTTTCTTGTGTTTCTTTAGNNGATCGGAAGAGCACACGTCTGAACTCCAGTCAC	rs73912715	A
TCCCTACACGACGCTCTTCCGATCTNNTGTGGCCTTCTTTTTCTTGAGTTTCTTTAGCTATTGTAATNNGATCGGAAGAGCACACGTCTGAACTCCAGTCAC	rs62108790	A
TCCCTACACGACGCTCTTCCGATCTNNCTAAGAAACAAAACCCGGGAAGACCTACAAATGAAATAGANNGATCGGAAGAGCACACGTCTGAACTCCAGTCAC	rs62108791	A
TCCCTACACGACGCTCTTCCGATCTNNTTAGATGGTAAGATGACATAAAATATTTTTAAAAATGTTANNGATCGGAAGAGCACACGTCTGAACTCCAGTCAC	rs73912716	A
TCCCTACACGACGCTCTTCCGATCTNNAAAGATACTTATTTAAAGCACCAGCATCATCAACTTTAATNNGATCGGAAGAGCACACGTCTGAACTCCAGTCAC	rs62108792	A
TCCCTACACGACGCTCTTCCGATCTNNCCAGCATCATCAACTTTAAATTATAATTTGGCATTTGCCTNNGATCGGAAGAGCACACGTCTGAACTCCAGTCAC	rs9679542	A
TCCCTACACGACGCTCTTCCGATCTNNAGTATCTGTTTGACGGTCCATTGTATTCAGCATGGTGAATNNGATCGGAAGAGCACACGTCTGAACTCCAGTCAC	rs9679429	A
TCCCTACACGACGCTCTTCCGATCTNNTTAGGGAGTGTTAGTAATTAGACATAGGCAGCAGGACCCCNNGATCGGAAGAGCACACGTCTGAACTCCAGTCAC	rs9679559	A
TCCCTACACGACGCTCTTCCGATCTNNGCATCCCATATCTCCAAGGACCATCAAAGAGTGCCTGTTCNNGATCGGAAGAGCACACGTCTGAACTCCAGTCAC	rs73912718	A
TCCCTACACGACGCTCTTCCGATCTNNTTTGACTCTTAGGAGATTTAGCCATATTTGTTTAATTGAGNNGATCGGAAGAGCACACGTCTGAACTCCAGTCAC	rs9679562	A
TCCCTACACGACGCTCTTCCGATCTNNGCCATATTTGTTTAATTGAAGCAAGAGTGAGTTACAAAAGNNGATCGGAAGAGCACACGTCTGAACTCCAGTCAC	rs9677482	A
TCCCTACACGACGCTCTTCCGATCTNNGTCTCAGCTTGTCCCACACAAGGGACCAAATCAAACCCTTNNGATCGGAAGAGCACACGTCTGAACTCCAGTCAC	rs9679727	A
TCCCTACACGACGCTCTTCCGATCTNNAATTCTTTCTAAACTGTCAAAAACAAATAGGAATTGGCTTNNGATCGGAAGAGCACACGTCTGAACTCCAGTCAC	rs62108836	A
TCCCTACACGACGCTCTTCCGATCTNNCAGCTGTTTCTGAAAGCCAACGTAGCTGCAGCTCCCAAAANNGATCGGAAGAGCACACGTCTGAACTCCAGTCAC	rs6760035	A
TCCCTACACGACGCTCTTCCGATCTNNAATGGGTTTCCCACACACCATCTCTACCCATAGGATGTATNNGATCGGAAGAGCACACGTCTGAACTCCAGTCAC	rs61360531	A
TCCCTACACGACGCTCTTCCGATCTNNAATCAATCTCTTTATCAGTATGCCTTAGTAATTGGATAAGNNGATCGGAAGAGCACACGTCTGAACTCCAGTCAC	rs57317793	A
TCCCTACACGACGCTCTTCCGATCTNNAGGCATCAATGGTATGCCTATTACCATAACTAATGAAAAGNNGATCGGAAGAGCACACGTCTGAACTCCAGTCAC	rs7602672	A
TCCCTACACGACGCTCTTCCGATCTNNCAAGTAATAATTCAATTTAATAACTGCAACAGGCCTTTAANNGATCGGAAGAGCACACGTCTGAACTCCAGTCAC	rs7562133	A
TCCCTACACGACGCTCTTCCGATCTNNGTGAGGGTTCTTGGCTTTGAGCAGGAAAGAATTCAAAGGCNNGATCGGAAGAGCACACGTCTGAACTCCAGTCAC	rs6542643	A
TCCCTACACGACGCTCTTCCGATCTNNTGGCAAATGCCACGCCAGTATGTGAAAGAATCAAGTACGCNNGATCGGAAGAGCACACGTCTGAACTCCAGTCAC	rs62108840	A
TCCCTACACGACGCTCTTCCGATCTNNTAGCAATTTCTCCAGTATCATTTAATATGTCCATCTTTGCNNGATCGGAAGAGCACACGTCTGAACTCCAGTCAC	rs57014213	A
TCCCTACACGACGCTCTTCCGATCTNNCAGTGACCCAGACTACCTTAGACAAGGAAGCCCTTCCCAGNNGATCGGAAGAGCACACGTCTGAACTCCAGTCAC	rs62108847	A
TCCCTACACGACGCTCTTCCGATCTNNTGAGGCAGGTGGATCACCTAAGGTCAGGAGTTCAAGATTANNGATCGGAAGAGCACACGTCTGAACTCCAGTCAC	rs149161040	A
TCCCTACACGACGCTCTTCCGATCTNNTTTAGTTTTGTTTTCTTTTATTTTTGTTTTTTGTTTTTTTNNGATCGGAAGAGCACACGTCTGAACTCCAGTCAC	rs7586027	A
TCCCTACACGACGCTCTTCCGATCTNNCGGATTTGGAGGAGACTCAAGTCTAAACTGTATCAGGAGGNNGATCGGAAGAGCACACGTCTGAACTCCAGTCAC	rs6712849	A
TCCCTACACGACGCTCTTCCGATCTNNAACACGGATGGAAGCAGAGACTATTATCTTAAGTGAAATANNGATCGGAAGAGCACACGTCTGAACTCCAGTCAC	rs6542646	A
TCCCTACACGACGCTCTTCCGATCTNNAAATGAACATTTTAAAAAAACATGAGAAAAGTTCTATTCANNGATCGGAAGAGCACACGTCTGAACTCCAGTCAC	rs6542647	A
TCCCTACACGACGCTCTTCCGATCTNNCCATTCTCCCAAAATACCTAAAGTCATTAATCTTCCATATNNGATCGGAAGAGCACACGTCTGAACTCCAGTCAC	rs6542648	A
TCCCTACACGACGCTCTTCCGATCTNNAGGAGGAGGGAGGTGAAGAACCCAGAAGTCATAGCCTGCANNGATCGGAAGAGCACACGTCTGAACTCCAGTCAC	rs7587235	A
TCCCTACACGACGCTCTTCCGATCTNNATCATCATTTAGCTCGAGGACCCCAGGTCCCCAAGGTGAGNNGATCGGAAGAGCACACGTCTGAACTCCAGTCAC	rs57123654	A
TCCCTACACGACGCTCTTCCGATCTNNATCGCTCAGTCAGGAGCCCAGAGCATAGGCTCGGGAAGGTNNGATCGGAAGAGCACACGTCTGAACTCCAGTCAC	rs12711961	A
TCCCTACACGACGCTCTTCCGATCTNNCAACACTTTGGGAGGCTGAAGCAGGTGGATTACGAGGTCANNGATCGGAAGAGCACACGTCTGAACTCCAGTCAC	rs7568991	A
TCCCTACACGACGCTCTTCCGATCTNNCAAGATTTTTTTAAAAAACATATTTTAGTCTCACGGTGCTNNGATCGGAAGAGCACACGTCTGAACTCCAGTCAC	rs2043005	A
TCCCTACACGACGCTCTTCCGATCTNNCCAGTGTGGTGTTTACTTAATATCTATTATGCTGGATTTGNNGATCGGAAGAGCACACGTCTGAACTCCAGTCAC	rs2043004	A
TCCCTACACGACGCTCTTCCGATCTNNTATGATGGGGCATGTTCTTATGCTCCCTGAACTATCTCAGNNGATCGGAAGAGCACACGTCTGAACTCCAGTCAC	rs2043003	A
TCCCTACACGACGCTCTTCCGATCTNNGTGCCATTCATTTGAGAGAAACGCTGTCTACCATGCTGTTNNGATCGGAAGAGCACACGTCTGAACTCCAGTCAC	rs2043002	A
TCCCTACACGACGCTCTTCCGATCTNNTGGGCAGCAGAGCAAGACTAAGTCTCAAAAGAAAAAAAGGNNGATCGGAAGAGCACACGTCTGAACTCCAGTCAC	rs2709465	A
TCCCTACACGACGCTCTTCCGATCTNNCCCTGGCAACACACACACAAGAGGTCCTTTAATGATAGCTNNGATCGGAAGAGCACACGTCTGAACTCCAGTCAC	rs2709466	A
TCCCTACACGACGCTCTTCCGATCTNNCAGGTTAACAACACTATAGAAATGTTTTGGGTTCTCAGAANNGATCGGAAGAGCACACGTCTGAACTCCAGTCAC	rs2564010	A
TCCCTACACGACGCTCTTCCGATCTNNAGAATGCCGATACATTCTTATGCCCCTTCTTAAGGTGCTTNNGATCGGAAGAGCACACGTCTGAACTCCAGTCAC	rs2709467	A
TCCCTACACGACGCTCTTCCGATCTNNGTGGGCCAGAAATAAGTGGATCAGATGTGAAACAGAAAAGNNGATCGGAAGAGCACACGTCTGAACTCCAGTCAC	rs2564011	A
TCCCTACACGACGCTCTTCCGATCTNNCTTGATTTTTAAAAATAATAAAGTGTATTCTTTTTGTAATNNGATCGGAAGAGCACACGTCTGAACTCCAGTCAC	rs11096530	A
TCCCTACACGACGCTCTTCCGATCTNNGAAAGGTTTATCATTAGACACACTATTAATGTAAATATAANNGATCGGAAGAGCACACGTCTGAACTCCAGTCAC	rs1949371	A
TCCCTACACGACGCTCTTCCGATCTNNGAAGGGATCTTCCAAGCTAAGTTAAGAAGTATAGATTTCANNGATCGGAAGAGCACACGTCTGAACTCCAGTCAC	rs10495682	A
TCCCTACACGACGCTCTTCCGATCTNNTGGCCTCCTGCCATGGAAGACTGAAGTGACCCCTGGCAGANNGATCGGAAGAGCACACGTCTGAACTCCAGTCAC	rs1038698	A
TCCCTACACGACGCTCTTCCGATCTNNTTGGATGATTGGGTCTGAAAAGTAGCTATCATTTATCTGGNNGATCGGAAGAGCACACGTCTGAACTCCAGTCAC	rs55922344	A
TCCCTACACGACGCTCTTCCGATCTNNTACTCTGTCTGGGTACCTGATACCAGTCTTGATAGAGTCANNGATCGGAAGAGCACACGTCTGAACTCCAGTCAC	rs2345833	A
TCCCTACACGACGCTCTTCCGATCTNNCTGGTATTTGCTAATCTTCATCATGCTGTTTTTGTTTTGCNNGATCGGAAGAGCACACGTCTGAACTCCAGTCAC	rs17678622	A
TCCCTACACGACGCTCTTCCGATCTNNGATTTTTAAAAACTTTAATACTTCATCTGTAATAGCCCGANNGATCGGAAGAGCACACGTCTGAACTCCAGTCAC	rs1949370	A
TCCCTACACGACGCTCTTCCGATCTNNTATTTTTCCTGATCCTCTCACTCCTCCCACCATCCACCCTNNGATCGGAAGAGCACACGTCTGAACTCCAGTCAC	rs57269598	A
TCCCTACACGACGCTCTTCCGATCTNNAGTCTCATCAAATTAAACTATTTTCACATTTCCATGTCCTNNGATCGGAAGAGCACACGTCTGAACTCCAGTCAC	rs1516912	A
TCCCTACACGACGCTCTTCCGATCTNNCATGGCTTTCAATATGATAAAGTGTCTGTCTCAAGACCTGNNGATCGGAAGAGCACACGTCTGAACTCCAGTCAC	rs1850357	A
TCCCTACACGACGCTCTTCCGATCTNNGAGAGAGGAGACCTCTATGAGGCTTAAATGACTCAGAATANNGATCGGAAGAGCACACGTCTGAACTCCAGTCAC	rs1516911	A
TCCCTACACGACGCTCTTCCGATCTNNAGTTCTGGGATATAGGTACAGAATGTGCATGTTTGGTACANNGATCGGAAGAGCACACGTCTGAACTCCAGTCAC	rs1489694	A
TCCCTACACGACGCTCTTCCGATCTNNTACAGAATGTGCATGTTTGATACATAGGTACATATGTGCCNNGATCGGAAGAGCACACGTCTGAACTCCAGTCAC	rs1489695	A
TCCCTACACGACGCTCTTCCGATCTNNAATTTTGTATCTGGTCAATAACTGAATTATTTTGTTTGTANNGATCGGAAGAGCACACGTCTGAACTCCAGTCAC	rs1489696	A
TCCCTACACGACGCTCTTCCGATCTNNAGGACTAATGGAAATAATTATCTGATGTGTTTCATGTTTANNGATCGGAAGAGCACACGTCTGAACTCCAGTCAC	rs16984782	A
TCCCTACACGACGCTCTTCCGATCTNNTAACTACAGAAAATAATTTATACTAGATGATTAAAGCAAANNGATCGGAAGAGCACACGTCTGAACTCCAGTCAC	rs1980174	A
TCCCTACACGACGCTCTTCCGATCTNNGTGTGGTTTCTTAGCCAGCAAGAAAAGCTAGAAGGGAATANNGATCGGAAGAGCACACGTCTGAACTCCAGTCAC	rs1980173	A
TCCCTACACGACGCTCTTCCGATCTNNTAACGATGGTCACCAAAGCACCACCCAGTTCAGGATTGTGNNGATCGGAAGAGCACACGTCTGAACTCCAGTCAC	rs6728515	A
TCCCTACACGACGCTCTTCCGATCTNNCATAATAAAGTGCCTAGAAAAGTGCGTAAGACATGTACAANNGATCGGAAGAGCACACGTCTGAACTCCAGTCAC	rs74633720	A
TCCCTACACGACGCTCTTCCGATCTNNCAGATCCCAGACAGCCACTAGGCTGCATCCTATTCCAGTTNNGATCGGAAGAGCACACGTCTGAACTCCAGTCAC	rs72613817	A
TCCCTACACGACGCTCTTCCGATCTNNTACTTAATGTTGTAGTGAGACTTCTAGTGGTGTTTGGAGGNNGATCGGAAGAGCACACGTCTGAACTCCAGTCAC	rs4665218	A
TCCCTACACGACGCTCTTCCGATCTNNGAGGCCAAACCAAGGACGCAGGAGAGAGGGGCAGGAGGGGNNGATCGGAAGAGCACACGTCTGAACTCCAGTCAC	rs10208318	A
TCCCTACACGACGCTCTTCCGATCTNNGAGAGGGGCAGGAGGGGACATCTTCTGCACATGCTACCTGNNGATCGGAAGAGCACACGTCTGAACTCCAGTCAC	rs10169305	A
TCCCTACACGACGCTCTTCCGATCTNNTCTCCTGCCATGCCATCACATGCCATCAAGGCCAGCAGCCNNGATCGGAAGAGCACACGTCTGAACTCCAGTCAC	rs10193850	A
TCCCTACACGACGCTCTTCCGATCTNNTGGGGTGGCTACTACAGCCAATCAGGACAGGACTTTGCATNNGATCGGAAGAGCACACGTCTGAACTCCAGTCAC	rs74722200	A
TCCCTACACGACGCTCTTCCGATCTNNTGGTCATCCTGCTGAGAGAAAACTCATTGTAAGCCACTCCNNGATCGGAAGAGCACACGTCTGAACTCCAGTCAC	rs13390546	A
TCCCTACACGACGCTCTTCCGATCTNNCTCATGCTTATAATTCAAGAACCTTTGGAGGCCAAGGTGGNNGATCGGAAGAGCACACGTCTGAACTCCAGTCAC	rs13411840	A
TCCCTACACGACGCTCTTCCGATCTNNTGGCTGTATCCCCACCCCAACTTACAATGCAAGGTATCTCNNGATCGGAAGAGCACACGTCTGAACTCCAGTCAC	rs72981931	A
TCCCTACACGACGCTCTTCCGATCTNNATCTCTTGAATGGTTTAAGAGGGAAATTAACATTTAGGTTNNGATCGGAAGAGCACACGTCTGAACTCCAGTCAC	rs78650210	A
TCCCTACACGACGCTCTTCCGATCTNNATAAGTGCCTTTGATTGCTATTTTTTCAAGAATCAAGTCCNNGATCGGAAGAGCACACGTCTGAACTCCAGTCAC	rs78692157	A
TCCCTACACGACGCTCTTCCGATCTNNCTTACATGTTTGAGATGAGAAAAGGAGAACTATAAAATATNNGATCGGAAGAGCACACGTCTGAACTCCAGTCAC	rs11895588	A
TCCCTACACGACGCTCTTCCGATCTNNTACAAAAATTAGCCAGGTGAGGTGGCAGGTGCCTGTAATCNNGATCGGAAGAGCACACGTCTGAACTCCAGTCAC	rs149976351	A
TCCCTACACGACGCTCTTCCGATCTNNATGATTTAAAAGTTTGATAAGGCATCAAGCACAATTTGGANNGATCGGAAGAGCACACGTCTGAACTCCAGTCAC	rs300356	A
TCCCTACACGACGCTCTTCCGATCTNNAAATTCATCTAATGTTAATATAAAACTTAAGGAATAATTTNNGATCGGAAGAGCACACGTCTGAACTCCAGTCAC	rs78052642	A
TCCCTACACGACGCTCTTCCGATCTNNTATTTCTTTGTAGCAACGCAAGAACAGCCTAATACAGATANNGATCGGAAGAGCACACGTCTGAACTCCAGTCAC	rs11902930	A
TCCCTACACGACGCTCTTCCGATCTNNAGCAAAGAAATGAGTTAACATTGGAATTTGTATTTAAACANNGATCGGAAGAGCACACGTCTGAACTCCAGTCAC	rs58065886	A
TCCCTACACGACGCTCTTCCGATCTNNCAGAGCTGTGCAAGGCTTTAGGAGCTTACTCCTTGTACCANNGATCGGAAGAGCACACGTCTGAACTCCAGTCAC	rs78788997	A
TCCCTACACGACGCTCTTCCGATCTNNGGCAGGGCCTCCCTGCAGGAATTGCTGCAACTATAGCCAGNNGATCGGAAGAGCACACGTCTGAACTCCAGTCAC	rs79937119	A
TCCCTACACGACGCTCTTCCGATCTNNCCAGGTGAATTGGGTCTGCAGTTGTCCCCCAGTAAGCCCCNNGATCGGAAGAGCACACGTCTGAACTCCAGTCAC	rs76762504	A
TCCCTACACGACGCTCTTCCGATCTNNACTCCTCAACTAATACAAAATAACTGAAATCATTACCAACNNGATCGGAAGAGCACACGTCTGAACTCCAGTCAC	rs2222231	A
TCCCTACACGACGCTCTTCCGATCTNNGTAAAGATAGATGCACGTGAATGTTCATTTCAGCACTATTNNGATCGGAAGAGCACACGTCTGAACTCCAGTCAC	rs78046968	A
TCCCTACACGACGCTCTTCCGATCTNNAGAATCAGTTTTTAGAGAAAATGATGATTTCAGTGTTGGCNNGATCGGAAGAGCACACGTCTGAACTCCAGTCAC	rs76421381	A
TCCCTACACGACGCTCTTCCGATCTNNTGCTCTGGCCATGTAAGACATGCCTCCTTTCTTTTTGGCTNNGATCGGAAGAGCACACGTCTGAACTCCAGTCAC	rs77816870	A
TCCCTACACGACGCTCTTCCGATCTNNATTTAGAAACATTTTATTGAAGATTTTATTACACAGATAANNGATCGGAAGAGCACACGTCTGAACTCCAGTCAC	rs2679445	A
TCCCTACACGACGCTCTTCCGATCTNNTAGGAGGCAATAACAGCTTAGAGAAGGTATCTCTATGTTCNNGATCGGAAGAGCACACGTCTGAACTCCAGTCAC	rs2683867	A
TCCCTACACGACGCTCTTCCGATCTNNAGAACATGACATCAGATTGAAATCCACAGAAACAATGAAGNNGATCGGAAGAGCACACGTCTGAACTCCAGTCAC	rs2679443	A
TCCCTACACGACGCTCTTCCGATCTNNATAACAATAATAGCAATCAAACAAGAAGAGAGAATAGAGTNNGATCGGAAGAGCACACGTCTGAACTCCAGTCAC	rs2679442	A
TCCCTACACGACGCTCTTCCGATCTNNACTCAAATTATTTTTGTGTATAGTATAAACAGAAGTAGAGNNGATCGGAAGAGCACACGTCTGAACTCCAGTCAC	rs2679457	A
TCCCTACACGACGCTCTTCCGATCTNNCAAGTAGACAGCATTACTAAACCAGTTTCTGTCATCAGCTNNGATCGGAAGAGCACACGTCTGAACTCCAGTCAC	rs13406425	A
TCCCTACACGACGCTCTTCCGATCTNNTCATCTTGGCAGGGATCACAGACCCTGTTCTTTAGGAGGCNNGATCGGAAGAGCACACGTCTGAACTCCAGTCAC	rs7607140	A
TCCCTACACGACGCTCTTCCGATCTNNATTGAGGCTAAAGGCAATCAGTTTTTTAGTATAGTCTTGCNNGATCGGAAGAGCACACGTCTGAACTCCAGTCAC	rs10197165	A
TCCCTACACGACGCTCTTCCGATCTNNGTTGAACATTGACTCCTTTATAAATACTTTACTATATCAANNGATCGGAAGAGCACACGTCTGAACTCCAGTCAC	rs7566184	A
TCCCTACACGACGCTCTTCCGATCTNNAGGATGTGCTCAGATAATAAGCAAATACTACACCACTTTANNGATCGGAAGAGCACACGTCTGAACTCCAGTCAC	rs10168705	A
TCCCTACACGACGCTCTTCCGATCTNNGGATACGAAGGGATGACTGAACTTAGAAAAAAAGAAGATTNNGATCGGAAGAGCACACGTCTGAACTCCAGTCAC	rs10203893	A
TCCCTACACGACGCTCTTCCGATCTNNAAACTTCAAGAGAAATACAACCAAGTTCTTAGGTTTTTAGNNGATCGGAAGAGCACACGTCTGAACTCCAGTCAC	rs13405535	A
TCCCTACACGACGCTCTTCCGATCTNNATTTTTTCCTCTGAGGAGGAAAGAATCAAATTGCTGCAGANNGATCGGAAGAGCACACGTCTGAACTCCAGTCAC	rs13432405	A
TCCCTACACGACGCTCTTCCGATCTNNTTACAAGTGAACATAATTTAAAAAAGCAACATAACACCTGNNGATCGGAAGAGCACACGTCTGAACTCCAGTCAC	rs13397930	A
TCCCTACACGACGCTCTTCCGATCTNNCTTATGCATTTTAAGAAATACTGTATTGGCTGGGCGCAGTNNGATCGGAAGAGCACACGTCTGAACTCCAGTCAC	rs10167048	A
TCCCTACACGACGCTCTTCCGATCTNNAGCTATCCGAGAGGCTGGGACAGGAGAATCGCTTGAACCCNNGATCGGAAGAGCACACGTCTGAACTCCAGTCAC	rs10175615	A
TCCCTACACGACGCTCTTCCGATCTNNAATCACGAGGTCGGGAGTTAGAGACGAGCCTGACCAACATNNGATCGGAAGAGCACACGTCTGAACTCCAGTCAC	rs11900941	A
TCCCTACACGACGCTCTTCCGATCTNNATATTGCTGATAGAAATATAAAATACGCAATCATTTTGGANNGATCGGAAGAGCACACGTCTGAACTCCAGTCAC	rs10171199	A
TCCCTACACGACGCTCTTCCGATCTNNCCCTTTTACTCCCCATTTGACAAGTGTTTTTTTTTTTTTTNNGATCGGAAGAGCACACGTCTGAACTCCAGTCAC	rs79918420	A
TCCCTACACGACGCTCTTCCGATCTNNTGTCCTTCTTCACGTGGCAACAGCAAGGAGAGGTGCAGAGNNGATCGGAAGAGCACACGTCTGAACTCCAGTCAC	rs13408052	A
TCCCTACACGACGCTCTTCCGATCTNNAAAATGAGATTTGGGTGGGAACACAGCCAAACCACAGCATNNGATCGGAAGAGCACACGTCTGAACTCCAGTCAC	rs13408263	A
TCCCTACACGACGCTCTTCCGATCTNNCCCTCTTCTCACAGCTCTAAGAGGCAGTGCCCCAGTGGGANNGATCGGAAGAGCACACGTCTGAACTCCAGTCAC	rs13386758	A
TCCCTACACGACGCTCTTCCGATCTNNTTCTACTCTCTCTTGAATGATTTGGCACTTAAAAATTTCTNNGATCGGAAGAGCACACGTCTGAACTCCAGTCAC	rs13387442	A
TCCCTACACGACGCTCTTCCGATCTNNTCACTATCAGCATTTTGTTAAAAGCCATTCAACAAGTTTCNNGATCGGAAGAGCACACGTCTGAACTCCAGTCAC	rs78122893	A
TCCCTACACGACGCTCTTCCGATCTNNTGCTGGGATTACAGGCGTGACCCACCACGTTCGGCTAATTNNGATCGGAAGAGCACACGTCTGAACTCCAGTCAC	rs77527063	A
TCCCTACACGACGCTCTTCCGATCTNNGACCTGAGGTGATCCACGCACCTCAGCCCCACAAAGTGCTNNGATCGGAAGAGCACACGTCTGAACTCCAGTCAC	rs13415315	A
TCCCTACACGACGCTCTTCCGATCTNNATCCACGCGCCTCAGCCCCACAAAGTGCTTGGATTACAGGNNGATCGGAAGAGCACACGTCTGAACTCCAGTCAC	rs13403742	A
TCCCTACACGACGCTCTTCCGATCTNNCATAGGGATTATCAGAATTACAATTCAAGATGAGATTTGGNNGATCGGAAGAGCACACGTCTGAACTCCAGTCAC	rs13404058	A
TCCCTACACGACGCTCTTCCGATCTNNTATTTTATTTTTTATTTCCATAGGTTATTGGGGAACAGCTNNGATCGGAAGAGCACACGTCTGAACTCCAGTCAC	rs11902033	A
TCCCTACACGACGCTCTTCCGATCTNNTTTCACCATGTTCGGCAAGATGGTCTTGAACTCCTGACCTNNGATCGGAAGAGCACACGTCTGAACTCCAGTCAC	rs2355159	A
TCCCTACACGACGCTCTTCCGATCTNNTTTCCCTGATCATTAGTGAAGTTGAGCATTTTTTCATATGNNGATCGGAAGAGCACACGTCTGAACTCCAGTCAC	rs145621384	A
TCCCTACACGACGCTCTTCCGATCTNNAGTGAAGCTGCAGACCCTCACGGTGAGTGTTACAGCTCTTNNGATCGGAAGAGCACACGTCTGAACTCCAGTCAC	rs2108812	A
TCCCTACACGACGCTCTTCCGATCTNNGGAGTTTTGTTTCCAGGAGAATTATGGCTGCCTCTGCTGTNNGATCGGAAGAGCACACGTCTGAACTCCAGTCAC	rs78308467	A
TCCCTACACGACGCTCTTCCGATCTNNTGTCAGCTCTGTCACCCAGACTGGAGTGCAGTGCTGCAATNNGATCGGAAGAGCACACGTCTGAACTCCAGTCAC	rs10170886	A
TCCCTACACGACGCTCTTCCGATCTNNTACGATCTCAGCTCACTGCAACCTCCACCTCCCGGGTTCANNGATCGGAAGAGCACACGTCTGAACTCCAGTCAC	rs11904437	A
TCCCTACACGACGCTCTTCCGATCTNNTATTTAAATGTGTTGTTAGACCCATATTCCTGATGGATTTNNGATCGGAAGAGCACACGTCTGAACTCCAGTCAC	rs13011467	A
TCCCTACACGACGCTCTTCCGATCTNNTAGGAAGGTTCCAGAGCAAAAGCGAGATTTTTCATAATGANNGATCGGAAGAGCACACGTCTGAACTCCAGTCAC	rs1446661	A
TCCCTACACGACGCTCTTCCGATCTNNAATCACATGGCTAGTCAGCAATAGGGCTGGGACTAGGATCNNGATCGGAAGAGCACACGTCTGAACTCCAGTCAC	rs34672069	A
TCCCTACACGACGCTCTTCCGATCTNNTCTCCTGCCTCAGCCTCCCAAGTAGCTGGGATCACAGGTGNNGATCGGAAGAGCACACGTCTGAACTCCAGTCAC	rs10930712	A
TCCCTACACGACGCTCTTCCGATCTNNTAGTAAAGAGATCCACATAATAGGAGGTAAATAATTCATANNGATCGGAAGAGCACACGTCTGAACTCCAGTCAC	rs12992981	A
TCCCTACACGACGCTCTTCCGATCTNNGGCACTGTGGTACTGAAAAACCTAATAGTTAAGTGCTATTNNGATCGGAAGAGCACACGTCTGAACTCCAGTCAC	rs10930713	A
TCCCTACACGACGCTCTTCCGATCTNNCTGCTCCAACCGAGCAGGCAAGAAAGAAGCTTTGCTGGCTNNGATCGGAAGAGCACACGTCTGAACTCCAGTCAC	rs67668653	A
TCCCTACACGACGCTCTTCCGATCTNNCAGGCTGGTGGGAGTACATAGTTCACCTTAAGGACTTCCTNNGATCGGAAGAGCACACGTCTGAACTCCAGTCAC	rs6747251	A
TCCCTACACGACGCTCTTCCGATCTNNAAAGCACACAGGACCCAAAAGCAAGCCAGTTTATGATGAANNGATCGGAAGAGCACACGTCTGAACTCCAGTCAC	rs35869887	A
TCCCTACACGACGCTCTTCCGATCTNNCTGCCACGCTCCCTAGCATAGAGTACAGCTATTCAAGGGTNNGATCGGAAGAGCACACGTCTGAACTCCAGTCAC	rs34038004	A
TCCCTACACGACGCTCTTCCGATCTNNAGGACCCAGGTCACACAGCAGGTAAGCAGATCTGTGTGACNNGATCGGAAGAGCACACGTCTGAACTCCAGTCAC	rs12987800	A
TCCCTACACGACGCTCTTCCGATCTNNAACCTTCAATGTTTCCTCAATAACTCTTGGATTAACTCCANNGATCGGAAGAGCACACGTCTGAACTCCAGTCAC	rs1367197	A
TCCCTACACGACGCTCTTCCGATCTNNCAACATCAACAAAAATTAGAAAGTGCCTGGGAAAAAACTTNNGATCGGAAGAGCACACGTCTGAACTCCAGTCAC	rs4674196	A
TCCCTACACGACGCTCTTCCGATCTNNACAACAAGCAAAAGAGGACATTCACCCTACCAAACAAAATNNGATCGGAAGAGCACACGTCTGAACTCCAGTCAC	rs6733585	A
TCCCTACACGACGCTCTTCCGATCTNNTTGAATGCTTGTCCCCTCCAAATTGCATGTTGGAATTTAANNGATCGGAAGAGCACACGTCTGAACTCCAGTCAC	rs6737145	A
TCCCTACACGACGCTCTTCCGATCTNNAAATCTAAACAATGTACACATAAAAATACTGGAAGAAAATNNGATCGGAAGAGCACACGTCTGAACTCCAGTCAC	rs7564310	A
TCCCTACACGACGCTCTTCCGATCTNNATGCCATGGTCCTCCACCCAGGACTACTTCTGATCTGTTGNNGATCGGAAGAGCACACGTCTGAACTCCAGTCAC	rs7578283	A
TCCCTACACGACGCTCTTCCGATCTNNCCAGCTGTGCCCAGCTGTGACCCACAGACTGAAGTGCTGTNNGATCGGAAGAGCACACGTCTGAACTCCAGTCAC	rs6436000	A
TCCCTACACGACGCTCTTCCGATCTNNGTAATATCCATCTTTCAGGATAGGCTAGGAGTTAATTGAGNNGATCGGAAGAGCACACGTCTGAACTCCAGTCAC	rs13035160	A
TCCCTACACGACGCTCTTCCGATCTNNTTAAATTAATAAATTTAAAATTTTAATTTTAAAAAAGAATNNGATCGGAAGAGCACACGTCTGAACTCCAGTCAC	rs4672841	A
TCCCTACACGACGCTCTTCCGATCTNNATGTCCACTCCTCACTTGAATGAATCTGCATTCATTTCGGNNGATCGGAAGAGCACACGTCTGAACTCCAGTCAC	rs1367194	A
TCCCTACACGACGCTCTTCCGATCTNNTCATCAAATCGCACGTGGTAGAATCAGGGAGCTGAAGAGANNGATCGGAAGAGCACACGTCTGAACTCCAGTCAC	rs1430128	A
TCCCTACACGACGCTCTTCCGATCTNNCCTGGTTCTCCCCACTGACAGTAGCCCAGACCTGTCTGGANNGATCGGAAGAGCACACGTCTGAACTCCAGTCAC	rs11888302	A
TCCCTACACGACGCTCTTCCGATCTNNGCCCCTACCTCTTCCAAGAAGCCCAGGAAGTGCACCTGCCNNGATCGGAAGAGCACACGTCTGAACTCCAGTCAC	rs11886179	A
TCCCTACACGACGCTCTTCCGATCTNNTGCCCTGCATGTGGCAGGCACTTATGAGCATTTGTCGAGTNNGATCGGAAGAGCACACGTCTGAACTCCAGTCAC	rs6758103	A
TCCCTACACGACGCTCTTCCGATCTNNTCCAGAAACATCATGGTACAGCACTACTGTCCCCATTTTTNNGATCGGAAGAGCACACGTCTGAACTCCAGTCAC	rs6758385	A
TCCCTACACGACGCTCTTCCGATCTNNTCGTGGTGCTCATGAGGCCAAGCTGAGGCTGGTCCGGGAANNGATCGGAAGAGCACACGTCTGAACTCCAGTCAC	rs10211283	A
TCCCTACACGACGCTCTTCCGATCTNNGGTCAGCCCATCCCAGTGCACACCATCACAGCTGGCAGACNNGATCGGAAGAGCACACGTCTGAACTCCAGTCAC	rs10181444	A
TCCCTACACGACGCTCTTCCGATCTNNGCTGTTCCTCCAGATTCAAATCCTCATCCCAGGGCCCTACNNGATCGGAAGAGCACACGTCTGAACTCCAGTCAC	rs62180943	A
TCCCTACACGACGCTCTTCCGATCTNNCCGTGAATGGTGGGGCTGGAGAGTGTGAACTCCGTCGAGCNNGATCGGAAGAGCACACGTCTGAACTCCAGTCAC	rs7576049	A
TCCCTACACGACGCTCTTCCGATCTNNCTGCTCCCACAGCAGCCACACCTCCTTCCCCTTCCTGCAGNNGATCGGAAGAGCACACGTCTGAACTCCAGTCAC	rs116566032	A
TCCCTACACGACGCTCTTCCGATCTNNGACCAGCCTGTGGGGCCCCACGGACAGCCCATGGGTCCAGNNGATCGGAAGAGCACACGTCTGAACTCCAGTCAC	rs12623196	A
TCCCTACACGACGCTCTTCCGATCTNNGGGTCCAGGCCTGGGGACGAGTCTTCGGAGGGTGGGGTAGNNGATCGGAAGAGCACACGTCTGAACTCCAGTCAC	rs12612849	A
TCCCTACACGACGCTCTTCCGATCTNNTCCCTGGCTAGCTGAGGGAAGGGGCTGGGGCCAGCGACAGNNGATCGGAAGAGCACACGTCTGAACTCCAGTCAC	rs11887422	A
TCCCTACACGACGCTCTTCCGATCTNNGGGACGGGGCTGGGGCCAGAGACAGCTCCTAGGAGCATGTNNGATCGGAAGAGCACACGTCTGAACTCCAGTCAC	rs4852086	A
TCCCTACACGACGCTCTTCCGATCTNNCCAGTTTGGCAAAGGCTGCACCACAGCCCAGTCAGCACACNNGATCGGAAGAGCACACGTCTGAACTCCAGTCAC	rs6727608	A
TCCCTACACGACGCTCTTCCGATCTNNAACCCAACTAGGACAAAGGACGTGATAAGGAGCATGGCATNNGATCGGAAGAGCACACGTCTGAACTCCAGTCAC	rs6706785	A
TCCCTACACGACGCTCTTCCGATCTNNGGCTGGGGGCCACCTTCTCAAATTTGTCTGCTTCTGTGGGNNGATCGGAAGAGCACACGTCTGAACTCCAGTCAC	rs4851978	A
TCCCTACACGACGCTCTTCCGATCTNNCGGCCAGCTCCTGTGCCCTACTCCTCACTACCACCCCAGGNNGATCGGAAGAGCACACGTCTGAACTCCAGTCAC	rs7573385	A
TCCCTACACGACGCTCTTCCGATCTNNTTTTTTTTTTGACAGTCTCACTCTCTCACCCAGGCTGGAGNNGATCGGAAGAGCACACGTCTGAACTCCAGTCAC	rs11887729	A
TCCCTACACGACGCTCTTCCGATCTNNCTATCCTGGTGGGGATGAGAAGGGTAGCTCAAACACTGTTNNGATCGGAAGAGCACACGTCTGAACTCCAGTCAC	rs12618591	A
TCCCTACACGACGCTCTTCCGATCTNNACACTTTGGGGTGTGCAGGAAGTTAAGAGCCTTCCTGAAGNNGATCGGAAGAGCACACGTCTGAACTCCAGTCAC	rs80202753	A
TCCCTACACGACGCTCTTCCGATCTNNCTTTGGGGTGTGCAGGCAGATAAGAGCCTTCCTGAAGCTCNNGATCGGAAGAGCACACGTCTGAACTCCAGTCAC	rs1994353	A
TCCCTACACGACGCTCTTCCGATCTNNATGCCCCCCTCCTCCCTCCAACACCCTCACTTCCTCCCATNNGATCGGAAGAGCACACGTCTGAACTCCAGTCAC	rs2411921	A
TCCCTACACGACGCTCTTCCGATCTNNGAGGAGAGCACACAGAGACACACAGGAAGAGCGCCCTGTGNNGATCGGAAGAGCACACGTCTGAACTCCAGTCAC	rs874014	A
TCCCTACACGACGCTCTTCCGATCTNNCCACTAGCTTGTGTGACTGAGTGTGGCCGAGGCTCTGACCNNGATCGGAAGAGCACACGTCTGAACTCCAGTCAC	rs28568414	A
TCCCTACACGACGCTCTTCCGATCTNNAACTCGGGGAGGGGCTCCCAAGGCTTCACCCACCCAGGCCNNGATCGGAAGAGCACACGTCTGAACTCCAGTCAC	rs62180954	A
TCCCTACACGACGCTCTTCCGATCTNNGAGGTAATGTGAGAAATGAACATTTGCTATTATAAGCCACNNGATCGGAAGAGCACACGTCTGAACTCCAGTCAC	rs6114527	A
TCCCTACACGACGCTCTTCCGATCTNNGTTGATGTAATTCGTCAGAATATATGGTTCTCCATATGAANNGATCGGAAGAGCACACGTCTGAACTCCAGTCAC	rs41308639	A
TCCCTACACGACGCTCTTCCGATCTNNGGCAGAAAGTAGATTAGTGATTGCCCACAACTTAGGGGCANNGATCGGAAGAGCACACGTCTGAACTCCAGTCAC	rs749573	A
TCCCTACACGACGCTCTTCCGATCTNNCTCTAAAGGTCATAGAGTGACACACTTTAAAATGGTGAGTNNGATCGGAAGAGCACACGTCTGAACTCCAGTCAC	rs357131	A
TCCCTACACGACGCTCTTCCGATCTNNCGTTCCTGCACAGCATTTCAGCCCATGGCTTATATACAGGNNGATCGGAAGAGCACACGTCTGAACTCCAGTCAC	rs357130	A
TCCCTACACGACGCTCTTCCGATCTNNCATGATCTGGGGTTTTTTTATTGTTGTTGTTCTTTGTGACNNGATCGGAAGAGCACACGTCTGAACTCCAGTCAC	rs7633380	A
TCCCTACACGACGCTCTTCCGATCTNNTTAACAACATATCCACACAAATATAACTTACAAACAATTTNNGATCGGAAGAGCACACGTCTGAACTCCAGTCAC	rs6442368	A
TCCCTACACGACGCTCTTCCGATCTNNACTTGCCAGTGTAAGCTCCATGTGTGTTATACACAAAGCCNNGATCGGAAGAGCACACGTCTGAACTCCAGTCAC	rs7614411	A
TCCCTACACGACGCTCTTCCGATCTNNATGATTTATTTTCCATTGTAAGAGCTCAGCAAAGCAGGACNNGATCGGAAGAGCACACGTCTGAACTCCAGTCAC	rs7636814	A
TCCCTACACGACGCTCTTCCGATCTNNCAGCAAAGCAGGACTGCTAATGAGAAACGTAGTGGGGAGANNGATCGGAAGAGCACACGTCTGAACTCCAGTCAC	rs7648308	A
TCCCTACACGACGCTCTTCCGATCTNNTGTGCTGTCCTGGCTGAGCATGGTGGCTCATGCCTGTAATNNGATCGGAAGAGCACACGTCTGAACTCCAGTCAC	rs9870936	A
TCCCTACACGACGCTCTTCCGATCTNNAAAAAAAAATTAGCGGGACATGGTGGTGGGCGCCTGTAATNNGATCGGAAGAGCACACGTCTGAACTCCAGTCAC	rs9871245	A
TCCCTACACGACGCTCTTCCGATCTNNTTGTATTTTTAGTAGAGACAAGGTTTCTCCATGTTGGTCANNGATCGGAAGAGCACACGTCTGAACTCCAGTCAC	rs165491	A
TCCCTACACGACGCTCTTCCGATCTNNTCACATGCTCAGCAGAATCAAGGAAAGCCCCTTCTGCAGANNGATCGGAAGAGCACACGTCTGAACTCCAGTCAC	rs357127	A
TCCCTACACGACGCTCTTCCGATCTNNGGTTTCACCGTGTTGGCCAAGATTGTCTCCATCTCTTGACNNGATCGGAAGAGCACACGTCTGAACTCCAGTCAC	rs357124	A
TCCCTACACGACGCTCTTCCGATCTNNTTACAGGCGTGAGCCACCGAGCCCGGCCCCACATACCAGCNNGATCGGAAGAGCACACGTCTGAACTCCAGTCAC	rs357123	A
TCCCTACACGACGCTCTTCCGATCTNNTCCCAGCACTTTGTGAGGCAGAGGCAGGTGAATCACGAGGNNGATCGGAAGAGCACACGTCTGAACTCCAGTCAC	rs357122	A
TCCCTACACGACGCTCTTCCGATCTNNGTCATGAATTCTGCCACAGACAGGGTACAATCTAAATACANNGATCGGAAGAGCACACGTCTGAACTCCAGTCAC	rs12632827	A
TCCCTACACGACGCTCTTCCGATCTNNGCTTGCCCTGTAACTGACTAGTCTACCCTAGTATAGGGTTNNGATCGGAAGAGCACACGTCTGAACTCCAGTCAC	rs184793	A
TCCCTACACGACGCTCTTCCGATCTNNCACTTTGGGAGGCCGAGGCAGGTGGATCACAAGGTCAGGANNGATCGGAAGAGCACACGTCTGAACTCCAGTCAC	rs4684925	A
TCCCTACACGACGCTCTTCCGATCTNNTACAAAAAATTAGCCAGGCATGGTGGCGTGTGCCTGTAATNNGATCGGAAGAGCACACGTCTGAACTCCAGTCAC	rs9819997	A
TCCCTACACGACGCTCTTCCGATCTNNAGGCATGCGCCACCATGCCAGGCTAATTTTTGTATTTTTANNGATCGGAAGAGCACACGTCTGAACTCCAGTCAC	rs596650	A
TCCCTACACGACGCTCTTCCGATCTNNGAACCCATCCTGATCATCCATATCCTCACCACTGGAGTGANNGATCGGAAGAGCACACGTCTGAACTCCAGTCAC	rs580438	A
TCCCTACACGACGCTCTTCCGATCTNNTAGAGGGCTGACTTCTTTTATGTTCTCTTAAAGAATTTTANNGATCGGAAGAGCACACGTCTGAACTCCAGTCAC	rs57635268	A
TCCCTACACGACGCTCTTCCGATCTNNACCCCCCAACATTTTAAGTAGACATCTATAACTTCATCCTNNGATCGGAAGAGCACACGTCTGAACTCCAGTCAC	rs552525	A
TCCCTACACGACGCTCTTCCGATCTNNCCTCTGCTCTAACTGCACAAGCTGACTGGTGGTGACCACCNNGATCGGAAGAGCACACGTCTGAACTCCAGTCAC	rs473030	A
TCCCTACACGACGCTCTTCCGATCTNNTTTCTTGGGGCATTCAATAAGGTTCTTAGGCTCTAGAAGCNNGATCGGAAGAGCACACGTCTGAACTCCAGTCAC	rs9856679	A
TCCCTACACGACGCTCTTCCGATCTNNAAGTTCAGCCTAGGACAGTAGTGGCTGAAGCCTGAAATAGNNGATCGGAAGAGCACACGTCTGAACTCCAGTCAC	rs719403	A
TCCCTACACGACGCTCTTCCGATCTNNTCTAGAGAAGTAATCCTACACACCTTACTTCACGTGAACTNNGATCGGAAGAGCACACGTCTGAACTCCAGTCAC	rs997334	A
TCCCTACACGACGCTCTTCCGATCTNNATACACTGTGCCTCTTTTCATGTACCTTTTATCATGCTGTNNGATCGGAAGAGCACACGTCTGAACTCCAGTCAC	rs9311054	A
TCCCTACACGACGCTCTTCCGATCTNNCAGCTATGACAGAAAACTGATGCTGATAAATGCAGCCCTGNNGATCGGAAGAGCACACGTCTGAACTCCAGTCAC	rs9866562	A
TCCCTACACGACGCTCTTCCGATCTNNAAAATTATATAAATGATAAATTTAGAATTGCAGAAAAGTANNGATCGGAAGAGCACACGTCTGAACTCCAGTCAC	rs6784860	A
TCCCTACACGACGCTCTTCCGATCTNNCAATGTTTATATAAATCAAAGAAATTATATAAAACTATTANNGATCGGAAGAGCACACGTCTGAACTCCAGTCAC	rs13353396	A
TCCCTACACGACGCTCTTCCGATCTNNTGTTCTATCTAAAAAATGAAACCCACTCATAGGGTTGTTANNGATCGGAAGAGCACACGTCTGAACTCCAGTCAC	rs9311055	A
TCCCTACACGACGCTCTTCCGATCTNNGAATAGAGTTCCTTAACAAATTTTTTTTTCTTAAACAACANNGATCGGAAGAGCACACGTCTGAACTCCAGTCAC	rs11916620	A
TCCCTACACGACGCTCTTCCGATCTNNATGCAAAGATTTTGATTTCACGAATTTAACTATCTGTAGANNGATCGGAAGAGCACACGTCTGAACTCCAGTCAC	rs1976987	A
TCCCTACACGACGCTCTTCCGATCTNNGAGATCTCATTTTTAAGACATGGCCTGGTTCACAAAGATANNGATCGGAAGAGCACACGTCTGAACTCCAGTCAC	rs1562691	A
TCCCTACACGACGCTCTTCCGATCTNNAAGGAGATGTAGAGATGAAAAAGTCAGGGCCTCTTTCCTCNNGATCGGAAGAGCACACGTCTGAACTCCAGTCAC	rs59999131	A
TCCCTACACGACGCTCTTCCGATCTNNAATTACTTAATTATGACACAAGGTGAAATGATACAAGTAGNNGATCGGAAGAGCACACGTCTGAACTCCAGTCAC	rs2069331	A
TCCCTACACGACGCTCTTCCGATCTNNAGATGATTGATTTTTCTGGATTCAGTGTCCTTGTTCTCCCNNGATCGGAAGAGCACACGTCTGAACTCCAGTCAC	rs9849812	A
TCCCTACACGACGCTCTTCCGATCTNNTCTGATTAACATGCAGATTAGTTTTCACCCTTGAGTTTTTNNGATCGGAAGAGCACACGTCTGAACTCCAGTCAC	rs1852808	A
TCCCTACACGACGCTCTTCCGATCTNNTGCAGTTGTAGTGTCCTCCAGAGGGGAACTCTTTAGGCCANNGATCGGAAGAGCACACGTCTGAACTCCAGTCAC	rs4610176	A
TCCCTACACGACGCTCTTCCGATCTNNCATTGAGAGCATCATCAGGAACTTCTGAGGCCCTTAGTAGNNGATCGGAAGAGCACACGTCTGAACTCCAGTCAC	rs35730254	A
TCCCTACACGACGCTCTTCCGATCTNNTTACGAATGGGCCCAGATTAGGTGATCTGAGCCAGGCCAANNGATCGGAAGAGCACACGTCTGAACTCCAGTCAC	rs2358597	A
TCCCTACACGACGCTCTTCCGATCTNNCCCTGAGGGTTGGGGGTTCACTGCCTGGCAGTGGAGGAGANNGATCGGAAGAGCACACGTCTGAACTCCAGTCAC	rs74461473	A
TCCCTACACGACGCTCTTCCGATCTNNCAGTAGGAGTGCAAGGGCTATACCCCCGGAGCTAGACAGCNNGATCGGAAGAGCACACGTCTGAACTCCAGTCAC	rs1283	A
TCCCTACACGACGCTCTTCCGATCTNNAGGCCAGGGGCGGGCCAAGAGGCGGGCCTTGGATTAGGAGNNGATCGGAAGAGCACACGTCTGAACTCCAGTCAC	rs62260802	A
TCCCTACACGACGCTCTTCCGATCTNNAAGCCGAGGTGGCAGATCAAGAGGTCAGGAGATCGAGACCNNGATCGGAAGAGCACACGTCTGAACTCCAGTCAC	rs62260803	A
TCCCTACACGACGCTCTTCCGATCTNNAGCACCCCCTCCAGAGAATACTTGATTTCTCAATTGGTTGNNGATCGGAAGAGCACACGTCTGAACTCCAGTCAC	rs55933602	A
TCCCTACACGACGCTCTTCCGATCTNNCCTAGTAGGTGTAAAGTGGAATCTCATTGGAGTTTTGATTNNGATCGGAAGAGCACACGTCTGAACTCCAGTCAC	rs11130727	A
TCCCTACACGACGCTCTTCCGATCTNNTCTGCCCTCCCAGGAACCCAGCCAGCACTGTGCTTGTTTGNNGATCGGAAGAGCACACGTCTGAACTCCAGTCAC	rs6787031	A
TCCCTACACGACGCTCTTCCGATCTNNTGACAGGAAATGGTGGCAAAGTCTTTTGCCTTTGAGTATTNNGATCGGAAGAGCACACGTCTGAACTCCAGTCAC	rs1447807	A
TCCCTACACGACGCTCTTCCGATCTNNACTATCACAGTTGTCTCTGAAGTCCTTGTGCTGAGCCGACNNGATCGGAAGAGCACACGTCTGAACTCCAGTCAC	rs6763159	A
TCCCTACACGACGCTCTTCCGATCTNNGACTTACAGGTATTATAGTAGACACCAAGTATCTTTGGTANNGATCGGAAGAGCACACGTCTGAACTCCAGTCAC	rs6808992	A
TCCCTACACGACGCTCTTCCGATCTNNCAAGAGCATGTCAGCAGGGAAGTTACACCTTTTCCAGACANNGATCGGAAGAGCACACGTCTGAACTCCAGTCAC	rs935788	A
TCCCTACACGACGCTCTTCCGATCTNNACAATTATTTTAGACACCAAGTCCCCAGTCCTCACTCCATNNGATCGGAAGAGCACACGTCTGAACTCCAGTCAC	rs1451308	A
TCCCTACACGACGCTCTTCCGATCTNNTCTTCTTCACTGAGTATCCAAGAGGATCTGTATACTATGGNNGATCGGAAGAGCACACGTCTGAACTCCAGTCAC	rs7641737	A
TCCCTACACGACGCTCTTCCGATCTNNGATAAAGTTAGAAAGGCCAATTTTTTCCCTGATTATAGAANNGATCGGAAGAGCACACGTCTGAACTCCAGTCAC	rs9829035	A
TCCCTACACGACGCTCTTCCGATCTNNCCTTACAACCTTTCTCCTCAAAGGTTTGGGTAAACTACAANNGATCGGAAGAGCACACGTCTGAACTCCAGTCAC	rs6445353	A
TCCCTACACGACGCTCTTCCGATCTNNAGGGGTGAAGTCAAGAAGGACAGTAAGGAGGTGGCTGCAGNNGATCGGAAGAGCACACGTCTGAACTCCAGTCAC	rs1812207	A
TCCCTACACGACGCTCTTCCGATCTNNAGGGAGGGAAGACACCCCTAAGGGTAGAGCAAGGATTGACNNGATCGGAAGAGCACACGTCTGAACTCCAGTCAC	rs6765108	A
TCCCTACACGACGCTCTTCCGATCTNNTCACCCAGGCTGGAGGGCAATGGTGCAATCTGGACTTACTNNGATCGGAAGAGCACACGTCTGAACTCCAGTCAC	rs11130929	A
TCCCTACACGACGCTCTTCCGATCTNNCTGCCTCCCTCGGCCTCCCAAAGTACTGGGATTACAGGCANNGATCGGAAGAGCACACGTCTGAACTCCAGTCAC	rs11130931	A
TCCCTACACGACGCTCTTCCGATCTNNGGCATGAACCACCATGCCCAGCCTAAATGTGTATGATTTANNGATCGGAAGAGCACACGTCTGAACTCCAGTCAC	rs11130932	A
TCCCTACACGACGCTCTTCCGATCTNNTTCAGGAACCAAGGAAGAGATGCAGCTACTATGAAAGATGNNGATCGGAAGAGCACACGTCTGAACTCCAGTCAC	rs11130934	A
TCCCTACACGACGCTCTTCCGATCTNNGAGACCTGTGTTCCCTCTCATTCCCCAACCCCAGCCCATCNNGATCGGAAGAGCACACGTCTGAACTCCAGTCAC	rs6796386	A
TCCCTACACGACGCTCTTCCGATCTNNCAGAACTTTAGACTCTCTCAATGATAGGTTGAAAGCTCCCNNGATCGGAAGAGCACACGTCTGAACTCCAGTCAC	rs6774410	A
TCCCTACACGACGCTCTTCCGATCTNNATTTAAAATGGAGATTCCAACCAGGCACGGTACACTGCTTNNGATCGGAAGAGCACACGTCTGAACTCCAGTCAC	rs6799217	A
TCCCTACACGACGCTCTTCCGATCTNNCTGGCCAACATGGTGAAACATCATCTCTACTGAAAATACANNGATCGGAAGAGCACACGTCTGAACTCCAGTCAC	rs6799148	A
TCCCTACACGACGCTCTTCCGATCTNNTCACTTGAACCCAGAAGGCAGAGGTTGCAGTGAGCCAAGANNGATCGGAAGAGCACACGTCTGAACTCCAGTCAC	rs4688172	A
TCCCTACACGACGCTCTTCCGATCTNNCACTGCACTCCAGCCTGGGAAACAGTGCAAGACTCTGTCTNNGATCGGAAGAGCACACGTCTGAACTCCAGTCAC	rs11921202	A
TCCCTACACGACGCTCTTCCGATCTNNGGATTGGCATCTTAAATAAACCCCAAGTAAGCCTTAGACTNNGATCGGAAGAGCACACGTCTGAACTCCAGTCAC	rs1566969	A
TCCCTACACGACGCTCTTCCGATCTNNAATTTTCTATTATGACATAAATTACTCTTAGAAAGAAAAANNGATCGGAAGAGCACACGTCTGAACTCCAGTCAC	rs7643728	A
TCCCTACACGACGCTCTTCCGATCTNNAAAAGTAGCACTTTTTTTGATTTTTTTCTGTTCTAAAATCNNGATCGGAAGAGCACACGTCTGAACTCCAGTCAC	rs4688405	A
TCCCTACACGACGCTCTTCCGATCTNNTAGCACTTTTTTTGGTTTTATTCTGTTCTAAAATCCTTTTNNGATCGGAAGAGCACACGTCTGAACTCCAGTCAC	rs4688406	A
TCCCTACACGACGCTCTTCCGATCTNNCAGTAAAAAGATCAGTGGTAGCCAAAGGTTGAGGGAGATGNNGATCGGAAGAGCACACGTCTGAACTCCAGTCAC	rs4688407	A
TCCCTACACGACGCTCTTCCGATCTNNCCACAGAATGTACAGCATCAAGAGTGAGCCCAGATATGAANNGATCGGAAGAGCACACGTCTGAACTCCAGTCAC	rs4688408	A
TCCCTACACGACGCTCTTCCGATCTNNGGACCTCATAGCTATACTAAAATTTCTTGTATGACTATATNNGATCGGAAGAGCACACGTCTGAACTCCAGTCAC	rs9857649	A
TCCCTACACGACGCTCTTCCGATCTNNTCAGGTTTAATTTTAAACAATTTATTCTTATTTATCTCTANNGATCGGAAGAGCACACGTCTGAACTCCAGTCAC	rs4688409	A
TCCCTACACGACGCTCTTCCGATCTNNAGAACTGGCTAATAGAAAGAATATATGGGCGAGAAGGTTANNGATCGGAAGAGCACACGTCTGAACTCCAGTCAC	rs7642736	A
TCCCTACACGACGCTCTTCCGATCTNNATACAAGAATTATCTGAGAATGGTGGCATGCCCCTGTAGTNNGATCGGAAGAGCACACGTCTGAACTCCAGTCAC	rs9826403	A
TCCCTACACGACGCTCTTCCGATCTNNAGAAAAGAAAAAGAAAAAAAAATAGAATAGAAAAGAAAAGNNGATCGGAAGAGCACACGTCTGAACTCCAGTCAC	rs9809266	A
TCCCTACACGACGCTCTTCCGATCTNNTCTAATCATAATTGACTACATTGTTATCTATTTTTTGAAANNGATCGGAAGAGCACACGTCTGAACTCCAGTCAC	rs4688411	A
TCCCTACACGACGCTCTTCCGATCTNNGAAGCTTGAGTCAGACAAGACCTCATTCTGGCCATGAAAANNGATCGGAAGAGCACACGTCTGAACTCCAGTCAC	rs11715745	A
TCCCTACACGACGCTCTTCCGATCTNNTCCTGCAGCCATTTACTGAAAGCAGACATACCCAAGCAAANNGATCGGAAGAGCACACGTCTGAACTCCAGTCAC	rs36211802	A
TCCCTACACGACGCTCTTCCGATCTNNGCCCTAATCCAATATGACTAGTTTCCTATAAGAAAAAGAANNGATCGGAAGAGCACACGTCTGAACTCCAGTCAC	rs112329502	A
TCCCTACACGACGCTCTTCCGATCTNNTGGAATCCTACTATATTTGACTTTTTCAGACTGGCTTATTNNGATCGGAAGAGCACACGTCTGAACTCCAGTCAC	rs112915369	A
TCCCTACACGACGCTCTTCCGATCTNNCACTGTCCTTATATTTCAGAAGTTTGATTATAGTGAGTCTNNGATCGGAAGAGCACACGTCTGAACTCCAGTCAC	rs6804359	A
TCCCTACACGACGCTCTTCCGATCTNNATCACTAGAACTCTTGGGAATTCAAAAACTCAGCTTTATTNNGATCGGAAGAGCACACGTCTGAACTCCAGTCAC	rs180717612	A
TCCCTACACGACGCTCTTCCGATCTNNAAAGCTTAAGTATTTGGGCAGCAGACTAGGAAACTGACTTNNGATCGGAAGAGCACACGTCTGAACTCCAGTCAC	rs78108816	A
TCCCTACACGACGCTCTTCCGATCTNNTACTTTAGATAGAGCCAGTATCACAAACCAAACTCTAGGGNNGATCGGAAGAGCACACGTCTGAACTCCAGTCAC	rs192597244	A
TCCCTACACGACGCTCTTCCGATCTNNCCAGAGAAGCGGGGGATTGATTTGGGCCTTATAGGGTATGNNGATCGGAAGAGCACACGTCTGAACTCCAGTCAC	rs182019291	A
TCCCTACACGACGCTCTTCCGATCTNNATAGGTAGATTGGAAATTTAAAAAAAAGCGACAAAACAAANNGATCGGAAGAGCACACGTCTGAACTCCAGTCAC	rs200320094	A
TCCCTACACGACGCTCTTCCGATCTNNCAATTCATAGGAAATTCCCACAGGCAGGTATCTTCAATCANNGATCGGAAGAGCACACGTCTGAACTCCAGTCAC	rs60342811	A
TCCCTACACGACGCTCTTCCGATCTNNGGAGCCATGGAGGAGCTTAAAAATCTGCTACTAAATACCANNGATCGGAAGAGCACACGTCTGAACTCCAGTCAC	rs57928279	A
TCCCTACACGACGCTCTTCCGATCTNNATACTAAGGCATGGAATGAATGGGTCCTGTGATAGGTATANNGATCGGAAGAGCACACGTCTGAACTCCAGTCAC	rs56755272	A
TCCCTACACGACGCTCTTCCGATCTNNTACATATGTATACATGTGCAATGCTGGTGCGCTGCACCCANNGATCGGAAGAGCACACGTCTGAACTCCAGTCAC	rs111538459	A
TCCCTACACGACGCTCTTCCGATCTNNTTTGTAGAGAAGAGGTCTCACCATGTTGCCCAGGCTGGTCNNGATCGGAAGAGCACACGTCTGAACTCCAGTCAC	rs192414812	A
TCCCTACACGACGCTCTTCCGATCTNNTTTAATGGATTGTGTTTTGATGTCTCATATAAGAAATCTTNNGATCGGAAGAGCACACGTCTGAACTCCAGTCAC	rs76457637	A
TCCCTACACGACGCTCTTCCGATCTNNAATTTGTCAGGCTATTCTCATTCCTTAATATTTCCATATGNNGATCGGAAGAGCACACGTCTGAACTCCAGTCAC	rs76617938	A
TCCCTACACGACGCTCTTCCGATCTNNAGATTTTATACATAGATTAACATGTTATCTGAAAATTATGNNGATCGGAAGAGCACACGTCTGAACTCCAGTCAC	rs75772292	A
TCCCTACACGACGCTCTTCCGATCTNNATTTATAATGAACAGAAATATATTTGGCTCACAGTTCTGGNNGATCGGAAGAGCACACGTCTGAACTCCAGTCAC	rs7620958	A
TCCCTACACGACGCTCTTCCGATCTNNGCATATATCATGATTTTTAAGTCTAAAAATTCAATGTGTTNNGATCGGAAGAGCACACGTCTGAACTCCAGTCAC	rs112116223	A
TCCCTACACGACGCTCTTCCGATCTNNACACAAGTGGCCAAAAAGCATATGAAAAAATGCTCAATATNNGATCGGAAGAGCACACGTCTGAACTCCAGTCAC	rs74782399	A
TCCCTACACGACGCTCTTCCGATCTNNCGAACTCCTGTGACATACAATTTACCCATGTTAACATACCNNGATCGGAAGAGCACACGTCTGAACTCCAGTCAC	rs182772996	A
TCCCTACACGACGCTCTTCCGATCTNNTGGAAATCCATGTTACTAGAGTAGAGATGCTTAAAGTCTCNNGATCGGAAGAGCACACGTCTGAACTCCAGTCAC	rs77619007	A
TCCCTACACGACGCTCTTCCGATCTNNATTTCCCTAATGACGAATGATGTTGAGCATCTTTTCATGTNNGATCGGAAGAGCACACGTCTGAACTCCAGTCAC	rs191065931	A
TCCCTACACGACGCTCTTCCGATCTNNTCACAACTCTGCAAATTACACATTATTGCTTTAACTTCATNNGATCGGAAGAGCACACGTCTGAACTCCAGTCAC	rs76964124	A
TCCCTACACGACGCTCTTCCGATCTNNGCATTATTCACAATGGCAAAGACTTGGAACCAACCCAAATNNGATCGGAAGAGCACACGTCTGAACTCCAGTCAC	rs59332094	A
TCCCTACACGACGCTCTTCCGATCTNNGGGGAACATCACACACTGCAGCCTGTTGAGGGGTGGAGGGNNGATCGGAAGAGCACACGTCTGAACTCCAGTCAC	rs145554819	A
TCCCTACACGACGCTCTTCCGATCTNNGGTGCTGTGGAGTAACATTAATACCACTACTTATGATTATNNGATCGGAAGAGCACACGTCTGAACTCCAGTCAC	rs117547718	A
TCCCTACACGACGCTCTTCCGATCTNNGAGCCAGGAATGGAACTTCAAGGCTGCCCGTTTTCACTTGNNGATCGGAAGAGCACACGTCTGAACTCCAGTCAC	rs6785102	A
TCCCTACACGACGCTCTTCCGATCTNNAAGGTGGCTGGGCAAGTGAAGAATCAGAGTCAGGAGATGGNNGATCGGAAGAGCACACGTCTGAACTCCAGTCAC	rs72946631	A
TCCCTACACGACGCTCTTCCGATCTNNTTGAGTGAGTACACTTTGTACTAGGAGCAAGATCCAGCCCNNGATCGGAAGAGCACACGTCTGAACTCCAGTCAC	rs76731656	A
TCCCTACACGACGCTCTTCCGATCTNNAATCTGGTAATATTTAATGAGCACGCTTGACCAATCCCTGNNGATCGGAAGAGCACACGTCTGAACTCCAGTCAC	rs113015898	A
TCCCTACACGACGCTCTTCCGATCTNNTTAAAAAAGGGTTGAGTCAATTTGTGATTGATAAAACAGANNGATCGGAAGAGCACACGTCTGAACTCCAGTCAC	rs3796250	A
TCCCTACACGACGCTCTTCCGATCTNNGTTTCTAAGAGAGAGCAGAACTAAAAAGCCCATCCTTACCNNGATCGGAAGAGCACACGTCTGAACTCCAGTCAC	rs6777674	A
TCCCTACACGACGCTCTTCCGATCTNNGAGTTAAAAAAAAAACCAGAAAACCAACACAAGACTCATANNGATCGGAAGAGCACACGTCTGAACTCCAGTCAC	rs6780162	A
TCCCTACACGACGCTCTTCCGATCTNNTAATAAACAGCTTTTGTTTATTTTGGCTCTGCCCTTACTANNGATCGGAAGAGCACACGTCTGAACTCCAGTCAC	rs6793390	A
TCCCTACACGACGCTCTTCCGATCTNNAGAGAAAGAGCCCAACTGGAGGCAGAAACAAGCTGCTGCANNGATCGGAAGAGCACACGTCTGAACTCCAGTCAC	rs77332991	A
TCCCTACACGACGCTCTTCCGATCTNNTGTAGTAAGGTTTCGTTGAATAGAGGAGTTAGAAAAAGTCNNGATCGGAAGAGCACACGTCTGAACTCCAGTCAC	rs201658819	A
TCCCTACACGACGCTCTTCCGATCTNNCGAGGTCTCCAAGAAGACTAAGCAAGTCTATGCCTAGTCTNNGATCGGAAGAGCACACGTCTGAACTCCAGTCAC	rs73235918	A
TCCCTACACGACGCTCTTCCGATCTNNCTACAGGTCACTCTTTGGGACTTGTACTGATGGATTCAGCNNGATCGGAAGAGCACACGTCTGAACTCCAGTCAC	rs73235919	A
TCCCTACACGACGCTCTTCCGATCTNNGCAGAGGCCAAAAGTGAAAAAATTCCAGCCTCATCATTCANNGATCGGAAGAGCACACGTCTGAACTCCAGTCAC	rs61316395	A
TCCCTACACGACGCTCTTCCGATCTNNTAATTTTGTTGTAGGGATCAGATTTATTTCTTATTCCTCANNGATCGGAAGAGCACACGTCTGAACTCCAGTCAC	rs66678247	A
TCCCTACACGACGCTCTTCCGATCTNNCACCAATTTTTGCAATGTGAGGAATAAAGTAAATTTAAATNNGATCGGAAGAGCACACGTCTGAACTCCAGTCAC	rs73235921	A
TCCCTACACGACGCTCTTCCGATCTNNGTCCAGTAAATACAATTACACTTGGGATGGTGGGAAGGATNNGATCGGAAGAGCACACGTCTGAACTCCAGTCAC	rs73235923	A
TCCCTACACGACGCTCTTCCGATCTNNCATTCTTCAGGCATCAGTCAAACCATGACCTCAGTGGAATNNGATCGGAAGAGCACACGTCTGAACTCCAGTCAC	rs1501281	A
TCCCTACACGACGCTCTTCCGATCTNNGCATTCTTTACGTAGTTCTAGAGCCTTGGTTTTCAGCTCCNNGATCGGAAGAGCACACGTCTGAACTCCAGTCAC	rs6441249	A
TCCCTACACGACGCTCTTCCGATCTNNAGGTCTGTTGGAGTACTGGACCCTGTGAGGTGTCAGTCTGNNGATCGGAAGAGCACACGTCTGAACTCCAGTCAC	rs9870274	A
TCCCTACACGACGCTCTTCCGATCTNNTATTGCCATTTGTGACACTATGGATGAACCTGGAGGATATNNGATCGGAAGAGCACACGTCTGAACTCCAGTCAC	rs13095658	A
TCCCTACACGACGCTCTTCCGATCTNNTTGTTCAAGTTACAACTGGATAAATGCTGTAAGTTATTATNNGATCGGAAGAGCACACGTCTGAACTCCAGTCAC	rs13094534	A
TCCCTACACGACGCTCTTCCGATCTNNTAGAAGAAAGACTTAATCTACTGCACAATCTACTTTTGATNNGATCGGAAGAGCACACGTCTGAACTCCAGTCAC	rs13080892	A
TCCCTACACGACGCTCTTCCGATCTNNCTCCCACTATTGTTGTGTGAGAAAGAATCATTCCTAAAGANNGATCGGAAGAGCACACGTCTGAACTCCAGTCAC	rs13082502	A
TCCCTACACGACGCTCTTCCGATCTNNATCCATGTTTTGAAGAGTCAGAGATACATAATAATAAAAANNGATCGGAAGAGCACACGTCTGAACTCCAGTCAC	rs13067585	A
TCCCTACACGACGCTCTTCCGATCTNNCTAATTTAAATGATAAATCAGAGCAGTTTGCAGAACATTANNGATCGGAAGAGCACACGTCTGAACTCCAGTCAC	rs13088547	A
TCCCTACACGACGCTCTTCCGATCTNNAACCCAGAGTTGGTGTATGAATTCACGTATCCACATTTGCNNGATCGGAAGAGCACACGTCTGAACTCCAGTCAC	rs34442071	A
TCCCTACACGACGCTCTTCCGATCTNNGAGCATCATTTACAGCCACAGAGGTCCGAGGGCAAAGCATNNGATCGGAAGAGCACACGTCTGAACTCCAGTCAC	rs13085824	A
TCCCTACACGACGCTCTTCCGATCTNNCAGCCACTGAGGTCCGAGGACAAAGCATCAGAATCACTTANNGATCGGAAGAGCACACGTCTGAACTCCAGTCAC	rs13063797	A
TCCCTACACGACGCTCTTCCGATCTNNTCATTCTAATAGTTCACACACAAGTTACTTTAGAACAACTNNGATCGGAAGAGCACACGTCTGAACTCCAGTCAC	rs61795163	A
TCCCTACACGACGCTCTTCCGATCTNNAAAATAAGTAGAATGAAACATAAAAGTCCATCAATGTGCTNNGATCGGAAGAGCACACGTCTGAACTCCAGTCAC	rs13083887	A
TCCCTACACGACGCTCTTCCGATCTNNTCCTTCAGTTAGTACCTGTAACAGATGCAAATACTTCTGTNNGATCGGAAGAGCACACGTCTGAACTCCAGTCAC	rs13061579	A
TCCCTACACGACGCTCTTCCGATCTNNCTCGTGATCCACCCGCCTCAGCCTCCCAAAGTGCAGTCCANNGATCGGAAGAGCACACGTCTGAACTCCAGTCAC	rs34415272	A
TCCCTACACGACGCTCTTCCGATCTNNTCTACAGGCCCTACAATATATAACTTTATTGCTTAATTTGNNGATCGGAAGAGCACACGTCTGAACTCCAGTCAC	rs13083138	A
TCCCTACACGACGCTCTTCCGATCTNNTCAGATTTTTCAGCTGTACAGTGGGGAAAGTGACTTAGTTNNGATCGGAAGAGCACACGTCTGAACTCCAGTCAC	rs17795417	A
TCCCTACACGACGCTCTTCCGATCTNNACCTTGAGGTGTGTACAACATTGAACAACACCAAGTTGTTNNGATCGGAAGAGCACACGTCTGAACTCCAGTCAC	rs7644770	A
TCCCTACACGACGCTCTTCCGATCTNNTCAAAATGCTGTGGAAAAAATGTGGAGAGCAGAGATGGAANNGATCGGAAGAGCACACGTCTGAACTCCAGTCAC	rs9827048	A
TCCCTACACGACGCTCTTCCGATCTNNATAAATTTAGGTCTCATGAATTCTAATGTTTTAGTACCCANNGATCGGAAGAGCACACGTCTGAACTCCAGTCAC	rs13085667	A
TCCCTACACGACGCTCTTCCGATCTNNTGCTAATATTAAACATTGCATGAGTTCAGAACGATATGCANNGATCGGAAGAGCACACGTCTGAACTCCAGTCAC	rs12696092	A
TCCCTACACGACGCTCTTCCGATCTNNGCCTTTGCCAAGCACTGGGAATACAATGATCACCAAAAGANNGATCGGAAGAGCACACGTCTGAACTCCAGTCAC	rs61795202	A
TCCCTACACGACGCTCTTCCGATCTNNCAGTGTGAATCCTGTGCAGAGAGCTGGATCCCACACAGAGNNGATCGGAAGAGCACACGTCTGAACTCCAGTCAC	rs9848338	A
TCCCTACACGACGCTCTTCCGATCTNNTGGAACTTTTTATAAAAATACATATTCCAGAACCACAACANNGATCGGAAGAGCACACGTCTGAACTCCAGTCAC	rs9848831	A
TCCCTACACGACGCTCTTCCGATCTNNTAAGTTTCATTTCCCAAAAATTTATTATTCTGCTTTGGTTNNGATCGGAAGAGCACACGTCTGAACTCCAGTCAC	rs1839219	A
TCCCTACACGACGCTCTTCCGATCTNNGAAGAATCCAAGACTCATGACATAAAACGCATCTGCTTGCNNGATCGGAAGAGCACACGTCTGAACTCCAGTCAC	rs1448996	A
TCCCTACACGACGCTCTTCCGATCTNNTCTATGAATCTTTCTCTGGACCTTTTTGATGCTAGCTGAGNNGATCGGAAGAGCACACGTCTGAACTCCAGTCAC	rs13083244	A
TCCCTACACGACGCTCTTCCGATCTNNTTTCTTTAGTAGAGATTGGATTTCATCATGTTGGCCAGGCNNGATCGGAAGAGCACACGTCTGAACTCCAGTCAC	rs13065596	A
TCCCTACACGACGCTCTTCCGATCTNNTTGCCTCAGCCACACCAGCATATAAGTTCATCAAACACATNNGATCGGAAGAGCACACGTCTGAACTCCAGTCAC	rs13075790	A
TCCCTACACGACGCTCTTCCGATCTNNCTGCTGGAGTTTAAAAGCCAATTATTCTCAAGATGTCTTTNNGATCGGAAGAGCACACGTCTGAACTCCAGTCAC	rs35220472	A
TCCCTACACGACGCTCTTCCGATCTNNCTATTTGTGTGGTGCCAGTATTCTGCTCACTAGAATGTAANNGATCGGAAGAGCACACGTCTGAACTCCAGTCAC	rs35611996	A
TCCCTACACGACGCTCTTCCGATCTNNGCTGACTGAGTATATGGGTATGTATACTTTGCTCTCTCAANNGATCGGAAGAGCACACGTCTGAACTCCAGTCAC	rs13061619	A
TCCCTACACGACGCTCTTCCGATCTNNAATGAGAAAAGGAAAACCTACCTTTAATGCCAGGGTATGTNNGATCGGAAGAGCACACGTCTGAACTCCAGTCAC	rs35150496	A
TCCCTACACGACGCTCTTCCGATCTNNGGGTACTGGTACAAATGAAAGTAAAGAGAGAGAGAAAGAGNNGATCGGAAGAGCACACGTCTGAACTCCAGTCAC	rs13065679	A
TCCCTACACGACGCTCTTCCGATCTNNGGTGGCAGGGGGGTGGGTTAGAAAACTACCTATTGAGGGCNNGATCGGAAGAGCACACGTCTGAACTCCAGTCAC	rs13085008	A
TCCCTACACGACGCTCTTCCGATCTNNTGACAAAAATCTATTTTTTATTCCTCATTAGGGTGCATATNNGATCGGAAGAGCACACGTCTGAACTCCAGTCAC	rs13096467	A
TCCCTACACGACGCTCTTCCGATCTNNTAATTAATAGATATTCAGGAAGATAGTTTGGGTCAGTGCTNNGATCGGAAGAGCACACGTCTGAACTCCAGTCAC	rs13077258	A
TCCCTACACGACGCTCTTCCGATCTNNTATATTGTCGTATTCCATCATATGGTTGTACCATACAATTNNGATCGGAAGAGCACACGTCTGAACTCCAGTCAC	rs34262815	A
TCCCTACACGACGCTCTTCCGATCTNNCCAAATACTAGAAAAAAAAATTTTTAAGAAAGAAAATTGCNNGATCGGAAGAGCACACGTCTGAACTCCAGTCAC	rs35342196	A
TCCCTACACGACGCTCTTCCGATCTNNTTACAGCCCAGCTTGTGAAAACAAATAATAAACCATAGACNNGATCGGAAGAGCACACGTCTGAACTCCAGTCAC	rs34202807	A
TCCCTACACGACGCTCTTCCGATCTNNTAGACATAATAAATAAATTACATGGTATGTTAGAAAGTGANNGATCGGAAGAGCACACGTCTGAACTCCAGTCAC	rs59583574	A
TCCCTACACGACGCTCTTCCGATCTNNAATTCAAATAGGAAAAATAAACAGAAACTCTTCAACATTTNNGATCGGAAGAGCACACGTCTGAACTCCAGTCAC	rs61795453	A
TCCCTACACGACGCTCTTCCGATCTNNTCCAGGATGACTTCTGGCCAAGCAAATTCATAGAGAATGCNNGATCGGAAGAGCACACGTCTGAACTCCAGTCAC	rs7620377	A
TCCCTACACGACGCTCTTCCGATCTNNGCCACATCATCTCCCTGCCAACATCTCCCACTATGCCTGTNNGATCGGAAGAGCACACGTCTGAACTCCAGTCAC	rs61795455	A
TCCCTACACGACGCTCTTCCGATCTNNACATGTCTAACAATCCCTAAGTTAGTGGGCATGGTGAGAGNNGATCGGAAGAGCACACGTCTGAACTCCAGTCAC	rs6784143	A
TCCCTACACGACGCTCTTCCGATCTNNCATTGGGGCCCAGAGAGAAAAAAAAAGTGGAGAAATGGATNNGATCGGAAGAGCACACGTCTGAACTCCAGTCAC	rs35807647	A
TCCCTACACGACGCTCTTCCGATCTNNAATCAAAAGAGTAATAATAATTTTTGCATGTAAAATTTACNNGATCGGAAGAGCACACGTCTGAACTCCAGTCAC	rs36116693	A
TCCCTACACGACGCTCTTCCGATCTNNGTTACTCTTCTAAATATCAAGGATCCATGAATACAATATANNGATCGGAAGAGCACACGTCTGAACTCCAGTCAC	rs61795459	A
TCCCTACACGACGCTCTTCCGATCTNNTAGATTAACCGTTCAGCTAAATTGTGGAAAAATGGAATGANNGATCGGAAGAGCACACGTCTGAACTCCAGTCAC	rs35729644	A
TCCCTACACGACGCTCTTCCGATCTNNTACACATTTGTAACAGTGGATGTGTTTGTCTCTGATAGCANNGATCGGAAGAGCACACGTCTGAACTCCAGTCAC	rs34566304	A
TCCCTACACGACGCTCTTCCGATCTNNATTCTTCTAACTCAGAGTTATGGACACCATAGTGGCAATGNNGATCGGAAGAGCACACGTCTGAACTCCAGTCAC	rs11917412	A
TCCCTACACGACGCTCTTCCGATCTNNCACCCCACAACAGTCCCCAAAGTGTGATGTTCCCCTTCATNNGATCGGAAGAGCACACGTCTGAACTCCAGTCAC	rs36157464	A
TCCCTACACGACGCTCTTCCGATCTNNATAGTTTGAAGTCAGGTAGAGTGATGCCTCCAGCTTTGTTNNGATCGGAAGAGCACACGTCTGAACTCCAGTCAC	rs61793212	A
TCCCTACACGACGCTCTTCCGATCTNNCCCATCCCCTGACAGGCCCAGGTGTGTGATGTTCCCCTCCNNGATCGGAAGAGCACACGTCTGAACTCCAGTCAC	rs61793214	A
TCCCTACACGACGCTCTTCCGATCTNNGCCTATGTCCTGAATGGTAATGCCTAGGTTTTCTTCTAGGNNGATCGGAAGAGCACACGTCTGAACTCCAGTCAC	rs11921435	A
TCCCTACACGACGCTCTTCCGATCTNNGTAGAGTGTATGTGTCGAGAAATTTATCCATTTCTTGTAGNNGATCGGAAGAGCACACGTCTGAACTCCAGTCAC	rs79482421	A
TCCCTACACGACGCTCTTCCGATCTNNCCTGCTTCAGCTCACACACAGTGCGCACACCCACTGACCTNNGATCGGAAGAGCACACGTCTGAACTCCAGTCAC	rs13096384	A
TCCCTACACGACGCTCTTCCGATCTNNTTGTTGGGTGGGGGGAGCAAGGAGGGATAGCATTAGGAGANNGATCGGAAGAGCACACGTCTGAACTCCAGTCAC	rs13078786	A
TCCCTACACGACGCTCTTCCGATCTNNCAAGTCTAACAGTTATTTAAATTTAAATACACTTAAAGAGNNGATCGGAAGAGCACACGTCTGAACTCCAGTCAC	rs35727941	A
TCCCTACACGACGCTCTTCCGATCTNNGAAGGAAATTCTTAAGTACAAAAGAAAAGGGCATTAATGANNGATCGGAAGAGCACACGTCTGAACTCCAGTCAC	rs35377806	A
TCCCTACACGACGCTCTTCCGATCTNNTTTTGGCTTTGAGTGCCTAAATCAAAGAAGAAGAAAAACTNNGATCGGAAGAGCACACGTCTGAACTCCAGTCAC	rs61793233	A
TCCCTACACGACGCTCTTCCGATCTNNAAAAGATCTGAATAGATATATCTCAAGAGAAGACATACAANNGATCGGAAGAGCACACGTCTGAACTCCAGTCAC	rs35249114	A
TCCCTACACGACGCTCTTCCGATCTNNGGCAAGAACCTTTATGTTAACGAAAAAAGACTGGTACCTCNNGATCGGAAGAGCACACGTCTGAACTCCAGTCAC	rs36054569	A
TCCCTACACGACGCTCTTCCGATCTNNCATTAAGTGTTCCAGGAAGACTTCCAGGAGCTGGGGATGANNGATCGGAAGAGCACACGTCTGAACTCCAGTCAC	rs2886480	A
TCCCTACACGACGCTCTTCCGATCTNNAAGGACATATCCCAGATAGATATCTATCTAGATATCTAGANNGATCGGAAGAGCACACGTCTGAACTCCAGTCAC	rs35556756	A
TCCCTACACGACGCTCTTCCGATCTNNAAAATACAAAACATTAGCCAGGCGTGGTGGCAGGCACCTGNNGATCGGAAGAGCACACGTCTGAACTCCAGTCAC	rs140928958	A
TCCCTACACGACGCTCTTCCGATCTNNATTCCTGAAAACCTCTCTAACTGCTGCTTCAGCTTTGTTANNGATCGGAAGAGCACACGTCTGAACTCCAGTCAC	rs73042336	A
TCCCTACACGACGCTCTTCCGATCTNNCCAAGCCAGTGCCACAGGGATTGAGGAGGGACACCCAAGGNNGATCGGAAGAGCACACGTCTGAACTCCAGTCAC	rs73042339	A
TCCCTACACGACGCTCTTCCGATCTNNAAAACTTTGACATGACTCAACCTATAGAGTAAGACTTGATNNGATCGGAAGAGCACACGTCTGAACTCCAGTCAC	rs6802120	A
TCCCTACACGACGCTCTTCCGATCTNNTCATTATAAGACTGATGCTAAAACCTAACACCCAGTTCTTNNGATCGGAAGAGCACACGTCTGAACTCCAGTCAC	rs12634739	A
TCCCTACACGACGCTCTTCCGATCTNNGGACTGCCACCAGTAAGCTATTCCACATAAGAATTTTGGANNGATCGGAAGAGCACACGTCTGAACTCCAGTCAC	rs1477767	A
TCCCTACACGACGCTCTTCCGATCTNNTCAAATTTTTATGCTCTTCATCCTGTTGAACACTTTGCTGNNGATCGGAAGAGCACACGTCTGAACTCCAGTCAC	rs10936976	A
TCCCTACACGACGCTCTTCCGATCTNNGTTGTTCCCCCATGTGTCCACGTGTTCTCATCATTCAGCANNGATCGGAAGAGCACACGTCTGAACTCCAGTCAC	rs1477784	A
TCCCTACACGACGCTCTTCCGATCTNNTTTGTTAAGGAAAATGACTACCAACTCCATCCATATTCCTNNGATCGGAAGAGCACACGTCTGAACTCCAGTCAC	rs1477783	A
TCCCTACACGACGCTCTTCCGATCTNNGCATGTCTGAATCTACTCTAGTATCAAGGCACCAATAAAANNGATCGGAAGAGCACACGTCTGAACTCCAGTCAC	rs7623291	A
TCCCTACACGACGCTCTTCCGATCTNNGCCTCTTGGAAATTTTTTTAAAAATGGGATTCACTATAGCNNGATCGGAAGAGCACACGTCTGAACTCCAGTCAC	rs2054398	A
TCCCTACACGACGCTCTTCCGATCTNNCAATAAATATCAATGTTTTACCTTGTCCTAGAAAAAAAAANNGATCGGAAGAGCACACGTCTGAACTCCAGTCAC	rs7612649	A
TCCCTACACGACGCTCTTCCGATCTNNTTTCCCCACCTGCAGAAGAAGTTTGACACAGCAAGTTGTTNNGATCGGAAGAGCACACGTCTGAACTCCAGTCAC	rs7621881	A
TCCCTACACGACGCTCTTCCGATCTNNTGGACCTCTCTGGTTTGCAAGTCTGCTAATGCCAGTTGTANNGATCGGAAGAGCACACGTCTGAACTCCAGTCAC	rs6789584	A
TCCCTACACGACGCTCTTCCGATCTNNTGCAGTGAGCCGAGATCGCACCACGGCACTCCAGCCTGGGNNGATCGGAAGAGCACACGTCTGAACTCCAGTCAC	rs141493176	A
TCCCTACACGACGCTCTTCCGATCTNNGACTAACAGCTGATCTCTCAGCAGAAACTCTACAAGCCAGNNGATCGGAAGAGCACACGTCTGAACTCCAGTCAC	rs143898047	A
TCCCTACACGACGCTCTTCCGATCTNNAGAAGAAATGGATAAATTCATGGACACATACACCCTCCCANNGATCGGAAGAGCACACGTCTGAACTCCAGTCAC	rs144707825	A
TCCCTACACGACGCTCTTCCGATCTNNAGGCTGCAGTGCAGTGGTGAGGTCTGGGCTCACTGCAACCNNGATCGGAAGAGCACACGTCTGAACTCCAGTCAC	rs117210812	A
TCCCTACACGACGCTCTTCCGATCTNNAGCACTTTGGGAGGCTGAGACAATGGGTGGATCGCCTGAGNNGATCGGAAGAGCACACGTCTGAACTCCAGTCAC	rs115267736	A
TCCCTACACGACGCTCTTCCGATCTNNGCCCCCGCGTCCGGCCACCAGACCGCTGGAGCTGGCGGGGNNGATCGGAAGAGCACACGTCTGAACTCCAGTCAC	rs149300866	A
TCCCTACACGACGCTCTTCCGATCTNNTAGGCCAAGTCAAGCACAAAGCAAGAAAGTTGCTGATTGTNNGATCGGAAGAGCACACGTCTGAACTCCAGTCAC	rs3755901	A
TCCCTACACGACGCTCTTCCGATCTNNCAGCCTCCCAGAATGCTGGAATTACAGGCGTGAGTGCCACNNGATCGGAAGAGCACACGTCTGAACTCCAGTCAC	rs11942607	A
TCCCTACACGACGCTCTTCCGATCTNNCTGACCTCATGATCTGCCCACCTCAGCCTCCCAAAGTGCTNNGATCGGAAGAGCACACGTCTGAACTCCAGTCAC	rs150310611	A
TCCCTACACGACGCTCTTCCGATCTNNAGCTGCCTCCTCCCATGGAAACTGCTCAGACGGAGGTTGCNNGATCGGAAGAGCACACGTCTGAACTCCAGTCAC	rs2227902	A
TCCCTACACGACGCTCTTCCGATCTNNGGCCGACATAGTGAAACCAAGTCTCTACTAAAAATACAAANNGATCGGAAGAGCACACGTCTGAACTCCAGTCAC	rs141786511	A
TCCCTACACGACGCTCTTCCGATCTNNAGTAACTGGGATTACAGGTATCCGCCACAACACCCAGCTANNGATCGGAAGAGCACACGTCTGAACTCCAGTCAC	rs11935933	A
TCCCTACACGACGCTCTTCCGATCTNNTACTACACTCCAGCCTGGGAAACAGAGTGATACTCCTCAANNGATCGGAAGAGCACACGTCTGAACTCCAGTCAC	rs7673980	A
TCCCTACACGACGCTCTTCCGATCTNNGCATTGAAATGCCAAATGAATAATTACTAGAAGGTATCCANNGATCGGAAGAGCACACGTCTGAACTCCAGTCAC	rs73242618	A
TCCCTACACGACGCTCTTCCGATCTNNTCAAAATTGGTTGACAGCGAATTTTGAGAGTGGAAGCCATNNGATCGGAAGAGCACACGTCTGAACTCCAGTCAC	rs73242619	A
TCCCTACACGACGCTCTTCCGATCTNNGGCGCAGTGGCTCACGCCTATAATCCCAGTACTTTGGGCGNNGATCGGAAGAGCACACGTCTGAACTCCAGTCAC	rs112564482	A
TCCCTACACGACGCTCTTCCGATCTNNACTAAAGAGAAATCATGATAAGACTGATTTGCTTTATTATNNGATCGGAAGAGCACACGTCTGAACTCCAGTCAC	rs73242620	A
TCCCTACACGACGCTCTTCCGATCTNNTTTGACCAATGTTTTTTTCATCTTGATAGTTTTTACACTANNGATCGGAAGAGCACACGTCTGAACTCCAGTCAC	rs73242621	A
TCCCTACACGACGCTCTTCCGATCTNNTTTGTATTTTTAGTAAAGAAGGGGTTTCACCGTGTTAGCCNNGATCGGAAGAGCACACGTCTGAACTCCAGTCAC	rs144393450	A
TCCCTACACGACGCTCTTCCGATCTNNCTCCTTGTTCCCTGCCTCCACTTCTGTCTCAGTATGGGCCNNGATCGGAAGAGCACACGTCTGAACTCCAGTCAC	rs73242622	A
TCCCTACACGACGCTCTTCCGATCTNNTTCTCCTGCCTCAGTCTCCAGAGTAAGCTGGGATTACAGGNNGATCGGAAGAGCACACGTCTGAACTCCAGTCAC	rs1961950	A
TCCCTACACGACGCTCTTCCGATCTNNTTCTATAAAAAAAATTGTCAGTAAGGCTGCTTTATTCACTNNGATCGGAAGAGCACACGTCTGAACTCCAGTCAC	rs41344750	A
TCCCTACACGACGCTCTTCCGATCTNNATAGTAATGGCACACAGTTATATTGTGTTGTTGGACATATNNGATCGGAAGAGCACACGTCTGAACTCCAGTCAC	rs55734441	A
TCCCTACACGACGCTCTTCCGATCTNNAAATTTAAGCCTGGCTGAGAGTAGTGGCTCACACCTGTAANNGATCGGAAGAGCACACGTCTGAACTCCAGTCAC	rs73242623	A
TCCCTACACGACGCTCTTCCGATCTNNCCTGGCCAACGTGGTGAAAACCCGTCTCTACTAAAAATACNNGATCGGAAGAGCACACGTCTGAACTCCAGTCAC	rs28520821	A
TCCCTACACGACGCTCTTCCGATCTNNTAGCTCCTGGCGCTGCTGGATTCTGGGCGGTTTTTGTCTTNNGATCGGAAGAGCACACGTCTGAACTCCAGTCAC	rs2276896	A
TCCCTACACGACGCTCTTCCGATCTNNCTATATTCTACATTCTCCCAGTAGAAAAAATATTTTATCTNNGATCGGAAGAGCACACGTCTGAACTCCAGTCAC	rs17828496	A
TCCCTACACGACGCTCTTCCGATCTNNTAGTTTTCTCTCCTGACATATTTGTCAAGAAGTACTTCAANNGATCGGAAGAGCACACGTCTGAACTCCAGTCAC	rs73242625	A
TCCCTACACGACGCTCTTCCGATCTNNGAGAGTTCATTGTTTCTAGACTGATCAGTTTCTCTTCTGTNNGATCGGAAGAGCACACGTCTGAACTCCAGTCAC	rs10026915	A
TCCCTACACGACGCTCTTCCGATCTNNGCCAATATGGTGAAACCCCATCTCTACTAGTAAAGTACAANNGATCGGAAGAGCACACGTCTGAACTCCAGTCAC	rs114513553	A
TCCCTACACGACGCTCTTCCGATCTNNACAGATAAGGAGTAGAGGAATGGCTTCCCTTTGGTTCGTTNNGATCGGAAGAGCACACGTCTGAACTCCAGTCAC	rs10002090	A
TCCCTACACGACGCTCTTCCGATCTNNAAAATTAGCTGGATGTGGTAGCAGGCACCTGTAGTCCCGGNNGATCGGAAGAGCACACGTCTGAACTCCAGTCAC	rs10034395	A
TCCCTACACGACGCTCTTCCGATCTNNTTTACTTTCAGATTTTGCCAGTAGTTACATACCTTATTATNNGATCGGAAGAGCACACGTCTGAACTCCAGTCAC	rs3775083	A
TCCCTACACGACGCTCTTCCGATCTNNGCAGTGAGCTGAGATCATGACACTGCACTCCAGCCTGGGCNNGATCGGAAGAGCACACGTCTGAACTCCAGTCAC	rs6843415	A
TCCCTACACGACGCTCTTCCGATCTNNTGTATTTCATTCTGTGGCAATAGCATGGTCAAAGGCTTGGNNGATCGGAAGAGCACACGTCTGAACTCCAGTCAC	rs28474684	A
TCCCTACACGACGCTCTTCCGATCTNNACGTAGTATAGGTGAGGGGAAATGGGCTGGTCTATTACTGNNGATCGGAAGAGCACACGTCTGAACTCCAGTCAC	rs56798906	A
TCCCTACACGACGCTCTTCCGATCTNNTGGTAGAGATGGGGTTTTGACATAGTTGGCCAGGCTGGTCNNGATCGGAAGAGCACACGTCTGAACTCCAGTCAC	rs28545156	A
TCCCTACACGACGCTCTTCCGATCTNNAAATGTGTGTATTAAAAATAGAGATAGAATTTACATACTGNNGATCGGAAGAGCACACGTCTGAACTCCAGTCAC	rs28719609	A
TCCCTACACGACGCTCTTCCGATCTNNTGTGGAGAGAGCTTGAACAAGTTGAATTTTATTTTGAAAANNGATCGGAAGAGCACACGTCTGAACTCCAGTCAC	rs10023009	A
TCCCTACACGACGCTCTTCCGATCTNNATCGTTCAGCTGTAGACCGAGGCTTCTTCAGGTTAGTATTNNGATCGGAAGAGCACACGTCTGAACTCCAGTCAC	rs2271806	A
TCCCTACACGACGCTCTTCCGATCTNNAAAATTTTTCTCCTGTACCAACTGATGGCAGAGATATTCTNNGATCGGAAGAGCACACGTCTGAACTCCAGTCAC	rs28681160	A
TCCCTACACGACGCTCTTCCGATCTNNATCACTTGAACCTGGGAGGAGGAGGTTGCAGTGAGCCGAGNNGATCGGAAGAGCACACGTCTGAACTCCAGTCAC	rs28370990	A
TCCCTACACGACGCTCTTCCGATCTNNACAGGCATGAGCCAAGGCGACTGGCCTGTGGATATTTTTTNNGATCGGAAGAGCACACGTCTGAACTCCAGTCAC	rs73242632	A
TCCCTACACGACGCTCTTCCGATCTNNTGCATTTATTTCACTTCTTATGTTGGGGAAACCTATTATCNNGATCGGAAGAGCACACGTCTGAACTCCAGTCAC	rs28623722	A
TCCCTACACGACGCTCTTCCGATCTNNAGGAGATACCTGTGAAAGAAAAAAGATCTAGTATTCCTCTNNGATCGGAAGAGCACACGTCTGAACTCCAGTCAC	rs2271807	A
TCCCTACACGACGCTCTTCCGATCTNNATCCATCTCCCAGCACTTAAGGAATCTGAAAAAATAATCCNNGATCGGAAGAGCACACGTCTGAACTCCAGTCAC	rs11573113	A
TCCCTACACGACGCTCTTCCGATCTNNAGCAGGCTGAGGATTTAACATTTTACCATCCTTGTGCAGTNNGATCGGAAGAGCACACGTCTGAACTCCAGTCAC	rs3755904	A
TCCCTACACGACGCTCTTCCGATCTNNTTCCTATTTCTCTCTCCCAATGCTTGGAATACCTTAGGTANNGATCGGAAGAGCACACGTCTGAACTCCAGTCAC	rs6837593	A
TCCCTACACGACGCTCTTCCGATCTNNACCATGATTGTGAGGCCTCACCAGCCTCATGGAGCTGTGANNGATCGGAAGAGCACACGTCTGAACTCCAGTCAC	rs7669759	A
TCCCTACACGACGCTCTTCCGATCTNNAGAATCTCCACCTAAGTCTACATACTCCTCCTTTGCTACANNGATCGGAAGAGCACACGTCTGAACTCCAGTCAC	rs67000357	A
TCCCTACACGACGCTCTTCCGATCTNNTGGGATTACAGGAGTGAGCAACAGCACCCGGCCTCCTTTGNNGATCGGAAGAGCACACGTCTGAACTCCAGTCAC	rs57368116	A
TCCCTACACGACGCTCTTCCGATCTNNAGGAGTGAGCAACAGCACCAGGCCTCCTTTGCCACTTTTANNGATCGGAAGAGCACACGTCTGAACTCCAGTCAC	rs59666483	A
TCCCTACACGACGCTCTTCCGATCTNNGTCCTCCAATATCATATTGAACTATATATTTTTTGCTTCGNNGATCGGAAGAGCACACGTCTGAACTCCAGTCAC	rs11941013	A
TCCCTACACGACGCTCTTCCGATCTNNCTTTCCTTAGCTGGCCTAAATGAGGATGCCAGCATCCTGTNNGATCGGAAGAGCACACGTCTGAACTCCAGTCAC	rs6822945	A
TCCCTACACGACGCTCTTCCGATCTNNCACTCACCAACCAATTAGTATATGACCAGGAGATGCAAATNNGATCGGAAGAGCACACGTCTGAACTCCAGTCAC	rs6554404	A
TCCCTACACGACGCTCTTCCGATCTNNTGTTGGCCAGGCTGGTCTCAAACTCCTGACCTCAGGTGATNNGATCGGAAGAGCACACGTCTGAACTCCAGTCAC	rs7688422	A
TCCCTACACGACGCTCTTCCGATCTNNCTCCAAACTCCTAGTCTCAAGGGTCCTTCTGCCTCAGCCTNNGATCGGAAGAGCACACGTCTGAACTCCAGTCAC	rs7672518	A
TCCCTACACGACGCTCTTCCGATCTNNGGCAAGTGCAACCATGCCCAGCTAATTAAAAAAGAATTTTNNGATCGGAAGAGCACACGTCTGAACTCCAGTCAC	rs7688831	A
TCCCTACACGACGCTCTTCCGATCTNNGGGCATATTATGTTCCAGAAGCTATGTTTAGCATTGGAGANNGATCGGAAGAGCACACGTCTGAACTCCAGTCAC	rs1980266	A
TCCCTACACGACGCTCTTCCGATCTNNCGTGAGCCATTTGACATCTACCCACTCTCACAGGCTGCCTNNGATCGGAAGAGCACACGTCTGAACTCCAGTCAC	rs1554457	A
TCCCTACACGACGCTCTTCCGATCTNNCCTGTAATCCTAGCTACTCAGGAGCCTGAGGCAGGAGAATNNGATCGGAAGAGCACACGTCTGAACTCCAGTCAC	rs3849580	A
TCCCTACACGACGCTCTTCCGATCTNNAGTATGTGGAAGGATATGCATAGGTTATATGCAAATATATNNGATCGGAAGAGCACACGTCTGAACTCCAGTCAC	rs6822317	A
TCCCTACACGACGCTCTTCCGATCTNNCCTCCCAAAGGTATTTTTAAGAGGTAATTATTTAGAAATANNGATCGGAAGAGCACACGTCTGAACTCCAGTCAC	rs4365752	A
TCCCTACACGACGCTCTTCCGATCTNNTTTTAAAAAGAGGTACCCCATTTGTGGAGATGAATTAGGANNGATCGGAAGAGCACACGTCTGAACTCCAGTCAC	rs2866688	A
TCCCTACACGACGCTCTTCCGATCTNNACACTGCCACCATAAATAAACTACTGGATAGCCTCGGTCTNNGATCGGAAGAGCACACGTCTGAACTCCAGTCAC	rs13131896	A
TCCCTACACGACGCTCTTCCGATCTNNACTCTGTATCTTTGTTCACATTGTTCATGGCTTCCACTTCNNGATCGGAAGAGCACACGTCTGAACTCCAGTCAC	rs9996218	A
TCCCTACACGACGCTCTTCCGATCTNNAAGAAATATGATTAATAGTATTTTCTCAAATATATTGACCNNGATCGGAAGAGCACACGTCTGAACTCCAGTCAC	rs4859881	A
TCCCTACACGACGCTCTTCCGATCTNNTACAATTGATTCTAATTAAAGTCCCTACCCTAAGGCTGTCNNGATCGGAAGAGCACACGTCTGAACTCCAGTCAC	rs17002823	A
TCCCTACACGACGCTCTTCCGATCTNNCTTCCTGCCTCAGCCTCCCAAAGTGCTGGGATTATAGGCANNGATCGGAAGAGCACACGTCTGAACTCCAGTCAC	rs55886549	A
TCCCTACACGACGCTCTTCCGATCTNNTATCATAACTGTCATTTTTATCAGTTAAGAAATCACAGAGNNGATCGGAAGAGCACACGTCTGAACTCCAGTCAC	rs57246363	A
TCCCTACACGACGCTCTTCCGATCTNNACTAGAATCAAAGAACTCTATTTGAGTCTATTTCAAAGACNNGATCGGAAGAGCACACGTCTGAACTCCAGTCAC	rs79663426	A
TCCCTACACGACGCTCTTCCGATCTNNATTAGATGGAAAAGACAAGATAAAAATGAAGTAAAAATAANNGATCGGAAGAGCACACGTCTGAACTCCAGTCAC	rs17002824	A
TCCCTACACGACGCTCTTCCGATCTNNATTCATTCTTAAATATTCAATGACATAAAGCAAGTGTTCANNGATCGGAAGAGCACACGTCTGAACTCCAGTCAC	rs17002825	A
TCCCTACACGACGCTCTTCCGATCTNNTTTTAAGGATCTCACCAAGACTAGAGAGGGAATTAACAGANNGATCGGAAGAGCACACGTCTGAACTCCAGTCAC	rs1521419	A
TCCCTACACGACGCTCTTCCGATCTNNTTTGAGACGGAGTTTCGCTATGTTGCCCAGGCTGGAGTGTNNGATCGGAAGAGCACACGTCTGAACTCCAGTCAC	rs11939576	A
TCCCTACACGACGCTCTTCCGATCTNNGTGCTGGGATTACAGGAGTAAGCCACCGCACCCGGCCAATNNGATCGGAAGAGCACACGTCTGAACTCCAGTCAC	rs77414115	A
TCCCTACACGACGCTCTTCCGATCTNNCTCCTCAAAACAAAGAGGTAGCAGTGCAATACTTTTTTCCNNGATCGGAAGAGCACACGTCTGAACTCCAGTCAC	rs17002828	A
TCCCTACACGACGCTCTTCCGATCTNNATGATTACCATCAACGAGGATTTGCAGTCTTTAAATGTACNNGATCGGAAGAGCACACGTCTGAACTCCAGTCAC	rs17002829	A
TCCCTACACGACGCTCTTCCGATCTNNAAAGTAGATATTTCAAAAAAGCCTGTTGATGTCATTAACANNGATCGGAAGAGCACACGTCTGAACTCCAGTCAC	rs17002831	A
TCCCTACACGACGCTCTTCCGATCTNNAGCTACCCAAGTAGCTAGGACTACAGACACATGCCACCACNNGATCGGAAGAGCACACGTCTGAACTCCAGTCAC	rs1402626	A
TCCCTACACGACGCTCTTCCGATCTNNTTATTTATTTTGAGACAGGATCTCCCTCTGGTTGCCCAGGNNGATCGGAAGAGCACACGTCTGAACTCCAGTCAC	rs55694923	A
TCCCTACACGACGCTCTTCCGATCTNNGGTCACCTCCTGTTTCTTTATTTGGTGGCCTTACACTTAANNGATCGGAAGAGCACACGTCTGAACTCCAGTCAC	rs4304001	A
TCCCTACACGACGCTCTTCCGATCTNNGAGATAGGGTTTCACCATGATGGCCAGGCTGGTCTCCAACNNGATCGGAAGAGCACACGTCTGAACTCCAGTCAC	rs112208963	A
TCCCTACACGACGCTCTTCCGATCTNNTTTTATGACCTGTATCTTAAGTGGACCTCCTATCTCAGCCNNGATCGGAAGAGCACACGTCTGAACTCCAGTCAC	rs11730329	A
TCCCTACACGACGCTCTTCCGATCTNNAACACAGGTGAATCACTTGAGGTCAGGAGTTCAAGACCAGNNGATCGGAAGAGCACACGTCTGAACTCCAGTCAC	rs11730403	A
TCCCTACACGACGCTCTTCCGATCTNNTAGCTGGGACTGCAGGCGCATGCCACCAACCTGGCTAATTNNGATCGGAAGAGCACACGTCTGAACTCCAGTCAC	rs6533290	A
TCCCTACACGACGCTCTTCCGATCTNNCACGCCATTCTCCTGCCTCAGCCTCCCGAGTAGCTGGGACNNGATCGGAAGAGCACACGTCTGAACTCCAGTCAC	rs4078523	A
TCCCTACACGACGCTCTTCCGATCTNNGAAATATGGCTTAATCTGAATATTTTCAAAATAAGACAGANNGATCGGAAGAGCACACGTCTGAACTCCAGTCAC	rs73827437	A
TCCCTACACGACGCTCTTCCGATCTNNATATGTACTGTGTTGGAAGAGGTGTAAATCATAGGGTAAGNNGATCGGAAGAGCACACGTCTGAACTCCAGTCAC	rs11733759	A
TCCCTACACGACGCTCTTCCGATCTNNTCTTACTCTCCCTAGCCTTATGTAGCTTTCCCTCTGGGTANNGATCGGAAGAGCACACGTCTGAACTCCAGTCAC	rs7657658	A
TCCCTACACGACGCTCTTCCGATCTNNCAAGATGTCATTGAAGCTGAGGAACAGCAATGGAGAATTGNNGATCGGAAGAGCACACGTCTGAACTCCAGTCAC	rs4410552	A
TCCCTACACGACGCTCTTCCGATCTNNTTCTAAAATTGTGCTGTCCAATGTGGTAGCCATATGTGGCNNGATCGGAAGAGCACACGTCTGAACTCCAGTCAC	rs6817305	A
TCCCTACACGACGCTCTTCCGATCTNNTATTTATGTGAGAGGAGGCAGTTTCTACCAGAAGCAGATGNNGATCGGAAGAGCACACGTCTGAACTCCAGTCAC	rs72868269	A
TCCCTACACGACGCTCTTCCGATCTNNAGACTGGGTAGATTCTGGTACTGGAGACATATCCCATGAGNNGATCGGAAGAGCACACGTCTGAACTCCAGTCAC	rs73827443	A
TCCCTACACGACGCTCTTCCGATCTNNCGAAACACACAGGGTCCTGAGCAACACGGAGGACTAACAGNNGATCGGAAGAGCACACGTCTGAACTCCAGTCAC	rs60135456	A
TCCCTACACGACGCTCTTCCGATCTNNCAATTTTCAAAGTGCTTTTAGGTGCTTTCGGAATTACTTCNNGATCGGAAGAGCACACGTCTGAACTCCAGTCAC	rs6827822	A
TCCCTACACGACGCTCTTCCGATCTNNTTGCTGAAATATCACCCCCATTTTTTTTTTTTTTTGAGACNNGATCGGAAGAGCACACGTCTGAACTCCAGTCAC	rs11737861	A
TCCCTACACGACGCTCTTCCGATCTNNTGGCTCACTGCAACCTCTGACTCTGGGGTTCAAGCAGTTCNNGATCGGAAGAGCACACGTCTGAACTCCAGTCAC	rs58358199	A
TCCCTACACGACGCTCTTCCGATCTNNAGAGACGGGGTTTTACCATATTGGCCAGGCTGGTCTTGAANNGATCGGAAGAGCACACGTCTGAACTCCAGTCAC	rs58218398	A
TCCCTACACGACGCTCTTCCGATCTNNGATGGAGTATCACTCTGTCACCCAGGCTGGAGTGCGGTGGNNGATCGGAAGAGCACACGTCTGAACTCCAGTCAC	rs141154199	A
TCCCTACACGACGCTCTTCCGATCTNNGATTACAGGCATGAGACACAGTGCCTGGCTATTATTACACNNGATCGGAAGAGCACACGTCTGAACTCCAGTCAC	rs7689226	A
TCCCTACACGACGCTCTTCCGATCTNNATTTTCTGACTTTAGAACTATCACACTCTTCATGGTTAGTNNGATCGGAAGAGCACACGTCTGAACTCCAGTCAC	rs11737353	A
TCCCTACACGACGCTCTTCCGATCTNNCATGCCTGTAATCCTGGCTACTCAGGAGACTGAGGCACAANNGATCGGAAGAGCACACGTCTGAACTCCAGTCAC	rs77774368	A
TCCCTACACGACGCTCTTCCGATCTNNATGGGGTTTCACCATGTTGACCAGGCTGGTCTCAGACTGCNNGATCGGAAGAGCACACGTCTGAACTCCAGTCAC	rs57868780	A
TCCCTACACGACGCTCTTCCGATCTNNACCGCTTGAACCTGGGAGGAGGACGTTGCAGTGAGCCCAGNNGATCGGAAGAGCACACGTCTGAACTCCAGTCAC	rs111665483	A
TCCCTACACGACGCTCTTCCGATCTNNCCATGTAAGGTAATATATTAACAAGATTTGGGAATTAGGANNGATCGGAAGAGCACACGTCTGAACTCCAGTCAC	rs11731374	A
TCCCTACACGACGCTCTTCCGATCTNNTTTGCACTACAGTGGCAGCATTGAGTCATTGCAGCAGAGANNGATCGGAAGAGCACACGTCTGAACTCCAGTCAC	rs55673370	A
TCCCTACACGACGCTCTTCCGATCTNNTACACTGGCTTTTTTTTTAAAAAAAATCTCTTAGGATATANNGATCGGAAGAGCACACGTCTGAACTCCAGTCAC	rs200185252	A
TCCCTACACGACGCTCTTCCGATCTNNACACTGGCTTTTTTTTTAAAAAAAATCTCTTAGGATATATNNGATCGGAAGAGCACACGTCTGAACTCCAGTCAC	rs185716590	A
TCCCTACACGACGCTCTTCCGATCTNNCTGTAACTTTGAAAAGTGAATTAAACTGCCTAGGTGGCATNNGATCGGAAGAGCACACGTCTGAACTCCAGTCAC	rs7687812	A
TCCCTACACGACGCTCTTCCGATCTNNTATTTTTAGTAGAGACAGGATTTCACCATGTTGGCCGGGGNNGATCGGAAGAGCACACGTCTGAACTCCAGTCAC	rs6836627	A
TCCCTACACGACGCTCTTCCGATCTNNCTTGACTCAGCCTGCCAAAATGTTGGGATTACAGGTGTGGNNGATCGGAAGAGCACACGTCTGAACTCCAGTCAC	rs6838630	A
TCCCTACACGACGCTCTTCCGATCTNNTGTTTGTGTTTATTTGGGGAGTGTGTGTGTGTGTGTTTGTNNGATCGGAAGAGCACACGTCTGAACTCCAGTCAC	rs7692075	A
TCCCTACACGACGCTCTTCCGATCTNNCGTTCTTCTCAGCACCACAATGCACTTATTCCAAAATTGANNGATCGGAAGAGCACACGTCTGAACTCCAGTCAC	rs28796999	A
TCCCTACACGACGCTCTTCCGATCTNNTAGAGAGAAATTTATAGCAATAAATGCCCACAAGAGAAAGNNGATCGGAAGAGCACACGTCTGAACTCCAGTCAC	rs28891692	A
TCCCTACACGACGCTCTTCCGATCTNNTAAAGGGGATATCACCACCAATCCCACAGAAATACAAACTNNGATCGGAAGAGCACACGTCTGAACTCCAGTCAC	rs7675586	A
TCCCTACACGACGCTCTTCCGATCTNNTTTTTGCCGGGGAGGAGAAAGTAGACAGGAAATAGTGATTNNGATCGGAAGAGCACACGTCTGAACTCCAGTCAC	rs7661064	A
TCCCTACACGACGCTCTTCCGATCTNNTAATACAGGTTCTAGGCCAAAGTCAGTGGGACTCAGTTCTNNGATCGGAAGAGCACACGTCTGAACTCCAGTCAC	rs57501818	A
TCCCTACACGACGCTCTTCCGATCTNNGAACTCTCCTAATAAGTGTAATCATTAATGGAAACAGGGANNGATCGGAAGAGCACACGTCTGAACTCCAGTCAC	rs4388114	A
TCCCTACACGACGCTCTTCCGATCTNNAATGGAAACAGGGAGTACAATTGGGAGGAAAAACAAGTTCNNGATCGGAAGAGCACACGTCTGAACTCCAGTCAC	rs4607246	A
TCCCTACACGACGCTCTTCCGATCTNNTTCCTCATACACACTAAGCACTCTCCCTCCTCAGGTCTTTNNGATCGGAAGAGCACACGTCTGAACTCCAGTCAC	rs73827451	A
TCCCTACACGACGCTCTTCCGATCTNNTTCAGGAGGTAATGTATGCAGTCCTAACTCACCTCTTTTCNNGATCGGAAGAGCACACGTCTGAACTCCAGTCAC	rs11723221	A
TCCCTACACGACGCTCTTCCGATCTNNTTTGGTGTTGAACATTCACAATGGTAGACCATTTGCTGAGNNGATCGGAAGAGCACACGTCTGAACTCCAGTCAC	rs11721383	A
TCCCTACACGACGCTCTTCCGATCTNNAAATTATGAAGTCCTTTATATGTTTATTCTTCCAGGAGACNNGATCGGAAGAGCACACGTCTGAACTCCAGTCAC	rs11097965	A
TCCCTACACGACGCTCTTCCGATCTNNTCAAGGTATTGGCCAGAGAAGTGGTTTCATCTTAGACTCANNGATCGGAAGAGCACACGTCTGAACTCCAGTCAC	rs4417999	A
TCCCTACACGACGCTCTTCCGATCTNNTTGTTGTTCAAGTATTCTTAAGTAATTTATAATATTATAANNGATCGGAAGAGCACACGTCTGAACTCCAGTCAC	rs72869573	A
TCCCTACACGACGCTCTTCCGATCTNNAAAGTGCCTATCCAACATAAGTAATTTTTTTCTTGTTCATNNGATCGGAAGAGCACACGTCTGAACTCCAGTCAC	rs11729703	A
TCCCTACACGACGCTCTTCCGATCTNNGGGTTCATATCAGATTTATATGTGATAGCCCCAAACTGGANNGATCGGAAGAGCACACGTCTGAACTCCAGTCAC	rs7671941	A
TCCCTACACGACGCTCTTCCGATCTNNATTCACTATCTGGCTCTTGATTTGCTGACTTCTGATCTAGNNGATCGGAAGAGCACACGTCTGAACTCCAGTCAC	rs73827456	A
TCCCTACACGACGCTCTTCCGATCTNNACTGTATCACCCAAGCTGGAGTACAGTGGCTTGATCTCAGNNGATCGGAAGAGCACACGTCTGAACTCCAGTCAC	rs6830993	A
TCCCTACACGACGCTCTTCCGATCTNNTTGTTCTTAATATTTCCTAACATTTGTATCTGTAACTTACNNGATCGGAAGAGCACACGTCTGAACTCCAGTCAC	rs6854989	A
TCCCTACACGACGCTCTTCCGATCTNNAAGAGATCAGATAAAAGGGAAAAGTCTTAGAGCATAAAACNNGATCGGAAGAGCACACGTCTGAACTCCAGTCAC	rs6832015	A
TCCCTACACGACGCTCTTCCGATCTNNCTTTAGTTTGTGTCCCGATATTTGCTATTGCAAATGATACNNGATCGGAAGAGCACACGTCTGAACTCCAGTCAC	rs4546268	A
TCCCTACACGACGCTCTTCCGATCTNNAGAAAACAACCAACTTAATATGTAAATTCTCTTTAACAAANNGATCGGAAGAGCACACGTCTGAACTCCAGTCAC	rs7687170	A
TCCCTACACGACGCTCTTCCGATCTNNGAAAAATACTTCTCGTAGGAGAGATAGATATGTAAATAAANNGATCGGAAGAGCACACGTCTGAACTCCAGTCAC	rs7663359	A
TCCCTACACGACGCTCTTCCGATCTNNGGTGGGCAGATCACCTGAGATCAGGAGTTTGAAACCAGCCNNGATCGGAAGAGCACACGTCTGAACTCCAGTCAC	rs113991468	A
TCCCTACACGACGCTCTTCCGATCTNNCAGGAGTTTGAAACCAGCCAGGCCAACAAGGTGAAATCCCNNGATCGGAAGAGCACACGTCTGAACTCCAGTCAC	rs112007582	A
TCCCTACACGACGCTCTTCCGATCTNNCAAAATTTAACCAATGTGAAACTAAACTTTTAAAAGTGGANNGATCGGAAGAGCACACGTCTGAACTCCAGTCAC	rs56138517	A
TCCCTACACGACGCTCTTCCGATCTNNCTTCTAAAGGAAGAAGGGTAATTTTGCTTTTATTCCCTCTNNGATCGGAAGAGCACACGTCTGAACTCCAGTCAC	rs7439347	A
TCCCTACACGACGCTCTTCCGATCTNNTTTTTGTATTTTTAGTAGAAATGGGGTTTCACCAGGTTGGNNGATCGGAAGAGCACACGTCTGAACTCCAGTCAC	rs4473672	A
TCCCTACACGACGCTCTTCCGATCTNNAAGTGATCTGCCCACGGTCACCTCCCAAAGTGTTAGGATTNNGATCGGAAGAGCACACGTCTGAACTCCAGTCAC	rs4331798	A
TCCCTACACGACGCTCTTCCGATCTNNAAAGTTAAAAAACTTTTCAATGGTTCTACATGTGCTGGCANNGATCGGAAGAGCACACGTCTGAACTCCAGTCAC	rs4561950	A
TCCCTACACGACGCTCTTCCGATCTNNAGCAGACTAACATGATCTGACTTCTAAAAGGCTCAGTCTCNNGATCGGAAGAGCACACGTCTGAACTCCAGTCAC	rs10428319	A
TCCCTACACGACGCTCTTCCGATCTNNCCGTAAACATTTTAGCATGAATAGCCTGAGGCTAGGGATANNGATCGGAAGAGCACACGTCTGAACTCCAGTCAC	rs58054752	A
TCCCTACACGACGCTCTTCCGATCTNNTAATTAAGTACTTTTTTTTATTTGTTTTTTGTTTTTTTTTNNGATCGGAAGAGCACACGTCTGAACTCCAGTCAC	rs57896992	A
TCCCTACACGACGCTCTTCCGATCTNNGTGAGAACTATTTGACATGATTTAAGAATCATTCTTATAGNNGATCGGAAGAGCACACGTCTGAACTCCAGTCAC	rs6821826	A
TCCCTACACGACGCTCTTCCGATCTNNCTCCTGGCCTCAAGTGATCAACCTGCCTTGGCCTCCTAAANNGATCGGAAGAGCACACGTCTGAACTCCAGTCAC	rs57221952	A
TCCCTACACGACGCTCTTCCGATCTNNATTTCTATTTTCTTCTTCCATTTCTCTCATTACTTTTTTANNGATCGGAAGAGCACACGTCTGAACTCCAGTCAC	rs11732039	A
TCCCTACACGACGCTCTTCCGATCTNNTGTGTAAAAAGGGAGTAAAATGATCTCCTTTCCCTTGCCANNGATCGGAAGAGCACACGTCTGAACTCCAGTCAC	rs11734428	A
TCCCTACACGACGCTCTTCCGATCTNNCAATAAAAACATCTATAAGACCATGTTATGAATTATTAAANNGATCGGAAGAGCACACGTCTGAACTCCAGTCAC	rs7659122	A
TCCCTACACGACGCTCTTCCGATCTNNGGCCTCACAGCAGGAGGTGAGTGGTGGGGGAGCAAGCAAANNGATCGGAAGAGCACACGTCTGAACTCCAGTCAC	rs73827459	A
TCCCTACACGACGCTCTTCCGATCTNNAGATTCCTTCTTAAATTAAAGGGTTTGTTGCAATGGGTGANNGATCGGAAGAGCACACGTCTGAACTCCAGTCAC	rs73827460	A
TCCCTACACGACGCTCTTCCGATCTNNAGCACTGTAACTAGATGAAATGATGAAATAACAGAGGATANNGATCGGAAGAGCACACGTCTGAACTCCAGTCAC	rs7673642	A
TCCCTACACGACGCTCTTCCGATCTNNGTACTTTTGTTGCCAACCAATACCACAGCTGCAGAACTATNNGATCGGAAGAGCACACGTCTGAACTCCAGTCAC	rs7656319	A
TCCCTACACGACGCTCTTCCGATCTNNGTACATGCCCTTAACTCTCATCTGTTCACGCAGCGCTGTGNNGATCGGAAGAGCACACGTCTGAACTCCAGTCAC	rs12108312	A
TCCCTACACGACGCTCTTCCGATCTNNAGAATACAAAAATCATTCAAAATTCCTGTAATCATTCACCNNGATCGGAAGAGCACACGTCTGAACTCCAGTCAC	rs1010728	A
TCCCTACACGACGCTCTTCCGATCTNNAAGAAAGGTGAATTTAGTGAGTATAAACATGACATCATTTNNGATCGGAAGAGCACACGTCTGAACTCCAGTCAC	rs1039467	A
TCCCTACACGACGCTCTTCCGATCTNNAGTAGGAAACCAGAAGTCTATCAGGATCCAACAAAGCTTTNNGATCGGAAGAGCACACGTCTGAACTCCAGTCAC	rs1847216	A
TCCCTACACGACGCTCTTCCGATCTNNAGGCCATTTGGCCTGCAAAACCTAAAATATTTACTGCCTTNNGATCGGAAGAGCACACGTCTGAACTCCAGTCAC	rs3860617	A
TCCCTACACGACGCTCTTCCGATCTNNGACGGGGTATTTTCTAAGAACTTTACCTTTAAATCCCTTTNNGATCGGAAGAGCACACGTCTGAACTCCAGTCAC	rs2174080	A
TCCCTACACGACGCTCTTCCGATCTNNCCCATTCAGTATTTTGTTGACTGTGGGTTTGTCATCGTGGNNGATCGGAAGAGCACACGTCTGAACTCCAGTCAC	rs2134459	A
TCCCTACACGACGCTCTTCCGATCTNNTCCTAGCACTTTGGGAGACAGAGGTGGGTGGATCACCTGANNGATCGGAAGAGCACACGTCTGAACTCCAGTCAC	rs2174078	A
TCCCTACACGACGCTCTTCCGATCTNNGTTTCGAGAGCAGAGAACTAGTCTGACCTCAAATTCACCANNGATCGGAAGAGCACACGTCTGAACTCCAGTCAC	rs6533358	A
TCCCTACACGACGCTCTTCCGATCTNNACAGTACTATATATTAAAGATGCTAAAATTTGAATAAAAGNNGATCGGAAGAGCACACGTCTGAACTCCAGTCAC	rs6850590	A
TCCCTACACGACGCTCTTCCGATCTNNTTTTATATTTCTGAAACATATATTGTCATTTTAGCTTGCTNNGATCGGAAGAGCACACGTCTGAACTCCAGTCAC	rs6533359	A
TCCCTACACGACGCTCTTCCGATCTNNAAATATAGCTATTTTCTTTAAAAAAAAAAAAGAAAATAAGNNGATCGGAAGAGCACACGTCTGAACTCCAGTCAC	rs11722195	A
TCCCTACACGACGCTCTTCCGATCTNNGCCCAGGCCACCACTAAGCAATGTATCCGTGTAACACAACNNGATCGGAAGAGCACACGTCTGAACTCCAGTCAC	rs1553386	A
TCCCTACACGACGCTCTTCCGATCTNNTAACAGTTCTACCAAATATAAATATGAAAGTTTAGTAAGANNGATCGGAAGAGCACACGTCTGAACTCCAGTCAC	rs9991424	A
TCCCTACACGACGCTCTTCCGATCTNNGTTGTTACATATGTATACAAGTGCTATGTCGGTGTGCTGCNNGATCGGAAGAGCACACGTCTGAACTCCAGTCAC	rs11097980	A
TCCCTACACGACGCTCTTCCGATCTNNAAATGTCATCATATGTGTTATTTGTGCCATCTTGTCAGGANNGATCGGAAGAGCACACGTCTGAACTCCAGTCAC	rs10856991	A
TCCCTACACGACGCTCTTCCGATCTNNCACTTTGGGAGGCCAAGGCAGGCGGATCATTTGAGGTCAGNNGATCGGAAGAGCACACGTCTGAACTCCAGTCAC	rs4859514	A
TCCCTACACGACGCTCTTCCGATCTNNCAGACAAATGGCAAGTACTAGAGGACTATAAGTTGAACAANNGATCGGAAGAGCACACGTCTGAACTCCAGTCAC	rs7661922	A
TCCCTACACGACGCTCTTCCGATCTNNAACACTTCATGACTAAAACATCAAAAGCAATGGCAACAAANNGATCGGAAGAGCACACGTCTGAACTCCAGTCAC	rs6821191	A
TCCCTACACGACGCTCTTCCGATCTNNCCCAGCAATCCCATTACTGAATATATACTCAGAGGATTATNNGATCGGAAGAGCACACGTCTGAACTCCAGTCAC	rs6827092	A
TCCCTACACGACGCTCTTCCGATCTNNGAACCTTGATTAAAATAAAATAAATGTAAATGTATTGTTCNNGATCGGAAGAGCACACGTCTGAACTCCAGTCAC	rs4859891	A
TCCCTACACGACGCTCTTCCGATCTNNATGTATTTCTATATAAGTTATAGAATCAGCTTGTGAATTTNNGATCGGAAGAGCACACGTCTGAACTCCAGTCAC	rs7694140	A
TCCCTACACGACGCTCTTCCGATCTNNTTGGCACCTTTGTCAAAGGACAATTGACCATAAATGCATGNNGATCGGAAGAGCACACGTCTGAACTCCAGTCAC	rs2088996	A
TCCCTACACGACGCTCTTCCGATCTNNCTCCAGCTTTGTTCTTTTTATGCAGCTATTTGGGGGTGTTNNGATCGGAAGAGCACACGTCTGAACTCCAGTCAC	rs2866810	A
TCCCTACACGACGCTCTTCCGATCTNNTATCTTTTACATTTCCATAAGAATTGTAGAATTAGTTTATNNGATCGGAAGAGCACACGTCTGAACTCCAGTCAC	rs2102190	A
TCCCTACACGACGCTCTTCCGATCTNNAACAAATTAATTTATAAACAGAAAGCTTTTGAAGGCTTACNNGATCGGAAGAGCACACGTCTGAACTCCAGTCAC	rs1502874	A
TCCCTACACGACGCTCTTCCGATCTNNTCTGACTTTATTATTATTTATTAAAGTTTAAAAAAGTTATNNGATCGGAAGAGCACACGTCTGAACTCCAGTCAC	rs1502875	A
TCCCTACACGACGCTCTTCCGATCTNNTTATTATTATTATTTTTTTAAAATAAAACTATATATATATNNGATCGGAAGAGCACACGTCTGAACTCCAGTCAC	rs13111807	A
TCCCTACACGACGCTCTTCCGATCTNNAATAAAACTATATATATATATTTTTTAATTGATCATTCTTNNGATCGGAAGAGCACACGTCTGAACTCCAGTCAC	rs13111829	A
TCCCTACACGACGCTCTTCCGATCTNNCACTTCCCAGACGGGGTGGAGGCCGGGCAGAGGCTGCAATNNGATCGGAAGAGCACACGTCTGAACTCCAGTCAC	rs3860618	A
TCCCTACACGACGCTCTTCCGATCTNNCGCGGTTAGGAGCTGGAGAACAGCCCAGCCAACACAGCGANNGATCGGAAGAGCACACGTCTGAACTCCAGTCAC	rs3931299	A
TCCCTACACGACGCTCTTCCGATCTNNAGCATCCACTGAGTGATTAATATGTGCCAGGTACTTTTCTNNGATCGGAAGAGCACACGTCTGAACTCCAGTCAC	rs13104147	A
TCCCTACACGACGCTCTTCCGATCTNNAAGTTCTTAACAACTGAAGACAGCAGTGGTGTGAAGCCAGNNGATCGGAAGAGCACACGTCTGAACTCCAGTCAC	rs6851286	A
TCCCTACACGACGCTCTTCCGATCTNNGTGGCGTGATCCCAGCTCAATGCAACCTCCACCTCCCAGGNNGATCGGAAGAGCACACGTCTGAACTCCAGTCAC	rs1847215	A
TCCCTACACGACGCTCTTCCGATCTNNAGAAATTCACATATACAACATTTGCAATAACATGGTTATANNGATCGGAAGAGCACACGTCTGAACTCCAGTCAC	rs6857479	A
TCCCTACACGACGCTCTTCCGATCTNNTGCAAGTTGGAATCTAGGTATGAGGGACTGTGGGGAGTGCNNGATCGGAAGAGCACACGTCTGAACTCCAGTCAC	rs6533374	A
TCCCTACACGACGCTCTTCCGATCTNNGCAGGTTTAAGTAATAAGAATATATATGAGGCTCACCTGCNNGATCGGAAGAGCACACGTCTGAACTCCAGTCAC	rs6533376	A
TCCCTACACGACGCTCTTCCGATCTNNTTTCAAAGAAGGCCCCGGGACAGAAAATGAAAAGACCCATNNGATCGGAAGAGCACACGTCTGAACTCCAGTCAC	rs76616305	A
TCCCTACACGACGCTCTTCCGATCTNNTGTGTGTAAAGTTTCCCACACCAAGTAGTTCTCCAATTCTNNGATCGGAAGAGCACACGTCTGAACTCCAGTCAC	rs1502880	A
TCCCTACACGACGCTCTTCCGATCTNNAAGTTTCCCACGCCAAGTAATTCTCCAATTCTCTGCAGACNNGATCGGAAGAGCACACGTCTGAACTCCAGTCAC	rs1502879	A
TCCCTACACGACGCTCTTCCGATCTNNAGGCTCTCCACAACCCCTCACTAGGTGAATCGTTTGCTAGNNGATCGGAAGAGCACACGTCTGAACTCCAGTCAC	rs2174079	A
TCCCTACACGACGCTCTTCCGATCTNNCAACGCTTAAGGAACACAAACCTCACATGAGCCATCCCTGNNGATCGGAAGAGCACACGTCTGAACTCCAGTCAC	rs4859894	A
TCCCTACACGACGCTCTTCCGATCTNNTTTGTTGCCCAGGTCGGAGAGCAGTGGCGCAATCTCGGCTNNGATCGGAAGAGCACACGTCTGAACTCCAGTCAC	rs35896758	A
TCCCTACACGACGCTCTTCCGATCTNNTACAGGTGCCCACCGCCACACCTGGCTAATTTTTGTTGTTNNGATCGGAAGAGCACACGTCTGAACTCCAGTCAC	rs7697219	A
TCCCTACACGACGCTCTTCCGATCTNNTTTTCCACTCAAACTTTTTATAGCATAACTTTATTATTTTNNGATCGGAAGAGCACACGTCTGAACTCCAGTCAC	rs4859515	A
TCCCTACACGACGCTCTTCCGATCTNNCATAAATAAACAGCTCTCTACATGTGACAAGTCTGGACATNNGATCGGAAGAGCACACGTCTGAACTCCAGTCAC	rs7698246	A
TCCCTACACGACGCTCTTCCGATCTNNGGTGGTCAATCATGTGTCTATGAAGGAGTTCTGATTGTAANNGATCGGAAGAGCACACGTCTGAACTCCAGTCAC	rs4859896	A
TCCCTACACGACGCTCTTCCGATCTNNTTATCTCCCAATAGAAATGATTGAAAATATGAAAACATTANNGATCGGAAGAGCACACGTCTGAACTCCAGTCAC	rs4859897	A
TCCCTACACGACGCTCTTCCGATCTNNTGGCTCCATTCATAGTTCCAGGTTACCCCATGTCTCTTAGNNGATCGGAAGAGCACACGTCTGAACTCCAGTCAC	rs4859898	A
TCCCTACACGACGCTCTTCCGATCTNNGTCAAAAATCCACATATAAATTTTGACTCCACCAAAACCTNNGATCGGAAGAGCACACGTCTGAACTCCAGTCAC	rs950263	A
TCCCTACACGACGCTCTTCCGATCTNNTTTTAACAATAAAGTAAGCAAGAGAAAAGAAAATCATAAGNNGATCGGAAGAGCACACGTCTGAACTCCAGTCAC	rs950264	A
TCCCTACACGACGCTCTTCCGATCTNNTACAAGGCATTGTTAAAACAACATGAGTGGCGGCTCATGTNNGATCGGAAGAGCACACGTCTGAACTCCAGTCAC	rs1910304	A
TCCCTACACGACGCTCTTCCGATCTNNTCCCAGCACTTTGGAAGACAGAGGCAGGAAGATTGCTTGANNGATCGGAAGAGCACACGTCTGAACTCCAGTCAC	rs12650649	A
TCCCTACACGACGCTCTTCCGATCTNNTTTATGAACACAAACAATGACTAGGAAAAGAAGGAATATTNNGATCGGAAGAGCACACGTCTGAACTCCAGTCAC	rs7699987	A
TCCCTACACGACGCTCTTCCGATCTNNTATTCTGGGTGATAGGTTCAGAGGTAGCTGGTTAACTAATNNGATCGGAAGAGCACACGTCTGAACTCCAGTCAC	rs7671432	A
TCCCTACACGACGCTCTTCCGATCTNNTGATGAACCTTCCACCCAGACTTAACATGAAGATAGAGAANNGATCGGAAGAGCACACGTCTGAACTCCAGTCAC	rs6835806	A
TCCCTACACGACGCTCTTCCGATCTNNATAAACATTAATTCCCCCAAAGATAGTATTTTTTTGCCCANNGATCGGAAGAGCACACGTCTGAACTCCAGTCAC	rs6533382	A
TCCCTACACGACGCTCTTCCGATCTNNACTGTCTCAAAAAAAAAAAAAAAAAAAAAGTAAGTTCTCCNNGATCGGAAGAGCACACGTCTGAACTCCAGTCAC	rs7678173	A
TCCCTACACGACGCTCTTCCGATCTNNTTGAGATTAGGGAGTGGTGATGACTCGTAACGAGCATGCTNNGATCGGAAGAGCACACGTCTGAACTCCAGTCAC	rs7669118	A
TCCCTACACGACGCTCTTCCGATCTNNTCTCCTATGTCTACTTCTTACTACACAGACACAGTAACAANNGATCGGAAGAGCACACGTCTGAACTCCAGTCAC	rs4283691	A
TCCCTACACGACGCTCTTCCGATCTNNTCCCAGACAGGGCGGCTGCAGGGCGGAGGGGCTGCTCACTNNGATCGGAAGAGCACACGTCTGAACTCCAGTCAC	rs6831876	A
TCCCTACACGACGCTCTTCCGATCTNNCCTCACTTCCCAGACTGGGAGGCCGGGCAGACGGGCTCCTNNGATCGGAAGAGCACACGTCTGAACTCCAGTCAC	rs6815390	A
TCCCTACACGACGCTCTTCCGATCTNNGACTGGGTGGCCGGGCAGAAGGGCTCCTCACATCCCAGACNNGATCGGAAGAGCACACGTCTGAACTCCAGTCAC	rs143257133	A
TCCCTACACGACGCTCTTCCGATCTNNTTGACTATGACTTAAAAAAAAAGTTCATTCTATCAAACACNNGATCGGAAGAGCACACGTCTGAACTCCAGTCAC	rs11098003	A
TCCCTACACGACGCTCTTCCGATCTNNTTAATGCCTCTATCCTTCCATTCAGTTCTTCTCCACTCCTNNGATCGGAAGAGCACACGTCTGAACTCCAGTCAC	rs11937191	A
TCCCTACACGACGCTCTTCCGATCTNNGATACACAGCTGTCATCCTAGGGTCTCCCTTCACCTTCTTNNGATCGGAAGAGCACACGTCTGAACTCCAGTCAC	rs6846322	A
TCCCTACACGACGCTCTTCCGATCTNNTTACATGCACGCACACACAAGCTCTTTTTCTCTCTGTCTANNGATCGGAAGAGCACACGTCTGAACTCCAGTCAC	rs6533390	A
TCCCTACACGACGCTCTTCCGATCTNNAGAAGAGGACAAGAAAATAAGGGAAAGTTTGGAACTTCCTNNGATCGGAAGAGCACACGTCTGAACTCCAGTCAC	rs2088993	A
TCCCTACACGACGCTCTTCCGATCTNNATGGTGCAATCTTGGCTCAATGCAACCTCTACCTCCTGGGNNGATCGGAAGAGCACACGTCTGAACTCCAGTCAC	rs6811802	A
TCCCTACACGACGCTCTTCCGATCTNNAAAAAAAATCGTTTTGTGGACCAGGCCTAGGGCCTTGATGNNGATCGGAAGAGCACACGTCTGAACTCCAGTCAC	rs12507708	A
TCCCTACACGACGCTCTTCCGATCTNNAAGGGGCCAATGTAGAGCTAAGGCCATTGCTTCAGAGGATNNGATCGGAAGAGCACACGTCTGAACTCCAGTCAC	rs4859899	A
TCCCTACACGACGCTCTTCCGATCTNNGAGGCCATTGCTTCAGAGGATGCAAGCCCCAAGCCTTGGTNNGATCGGAAGAGCACACGTCTGAACTCCAGTCAC	rs4859900	A
TCCCTACACGACGCTCTTCCGATCTNNTTTCAGAGAATGTATAGAAACACCTTGATGTCCAGACAGANNGATCGGAAGAGCACACGTCTGAACTCCAGTCAC	rs4859901	A
TCCCTACACGACGCTCTTCCGATCTNNCTCTTTGCCCTGCACTGCAATATCTAGTCAGAGGGAGGTGNNGATCGGAAGAGCACACGTCTGAACTCCAGTCAC	rs2036458	A
TCCCTACACGACGCTCTTCCGATCTNNATATCTGCATTATTTAGTCAACAAATATTTATGTGCTAGCNNGATCGGAAGAGCACACGTCTGAACTCCAGTCAC	rs12643573	A
TCCCTACACGACGCTCTTCCGATCTNNACTACAGGCGCCCGCCACCACGCCCGGCTAATTTTTTTTGNNGATCGGAAGAGCACACGTCTGAACTCCAGTCAC	rs12507613	A
TCCCTACACGACGCTCTTCCGATCTNNCAACCTGGGGAAAGCCACAATTGCTTTCCTCCCACTGTGGNNGATCGGAAGAGCACACGTCTGAACTCCAGTCAC	rs12649822	A
TCCCTACACGACGCTCTTCCGATCTNNGCTGTCACCAAGGGAAGTGACAGCCCTAATAAGTAAAGTCNNGATCGGAAGAGCACACGTCTGAACTCCAGTCAC	rs72659023	A
TCCCTACACGACGCTCTTCCGATCTNNGTAACCATCCTTCTACAACATGGATGGAAGTGGAGGTCCTNNGATCGGAAGAGCACACGTCTGAACTCCAGTCAC	rs12509281	A
TCCCTACACGACGCTCTTCCGATCTNNCCCTTGTGAAGCCACAACAACCTTCTCCCCTAAGGGCTCTNNGATCGGAAGAGCACACGTCTGAACTCCAGTCAC	rs17409828	A
TCCCTACACGACGCTCTTCCGATCTNNTCCAAAATTTCATAAAAATAGAATCATATAATATCTATGANNGATCGGAAGAGCACACGTCTGAACTCCAGTCAC	rs66516926	A
TCCCTACACGACGCTCTTCCGATCTNNAAAGTCCTGTAGCTGCTACAGTATCACCCTCCTGTGTGTGNNGATCGGAAGAGCACACGTCTGAACTCCAGTCAC	rs12646871	A
TCCCTACACGACGCTCTTCCGATCTNNTCAAAACAGCATGGTAGTGATACCAAAAGAGATATATAGANNGATCGGAAGAGCACACGTCTGAACTCCAGTCAC	rs74215245	A
TCCCTACACGACGCTCTTCCGATCTNNGATGTGGAGAAATAGGAACACTTTTACACTGTTGGTGGGANNGATCGGAAGAGCACACGTCTGAACTCCAGTCAC	rs141480446	A
TCCCTACACGACGCTCTTCCGATCTNNGAATTTAGATCCTGGGGGCAGGATGTAGCAGAGAGAGATTNNGATCGGAAGAGCACACGTCTGAACTCCAGTCAC	rs10008693	A
TCCCTACACGACGCTCTTCCGATCTNNGTAATGACCCAGATGGGCTAAGGTTGAGAATTGCTTGAAANNGATCGGAAGAGCACACGTCTGAACTCCAGTCAC	rs408523	A
TCCCTACACGACGCTCTTCCGATCTNNGATGGGCTCAGGTTGAGAAATGCTTGAAAGCAGGGGTTTTNNGATCGGAAGAGCACACGTCTGAACTCCAGTCAC	rs385040	A
TCCCTACACGACGCTCTTCCGATCTNNTTACAGTTGACCAGAAACAAGTATGCTATCATTCACCAAANNGATCGGAAGAGCACACGTCTGAACTCCAGTCAC	rs441180	A
TCCCTACACGACGCTCTTCCGATCTNNCGGAAATCTAGTTTAATTTAAAGCAGACAGGTTAAAAGGCNNGATCGGAAGAGCACACGTCTGAACTCCAGTCAC	rs437000	A
TCCCTACACGACGCTCTTCCGATCTNNTGGCACCTCACTTTCATTAAGGAGAGCAAGCAAGAGAGTANNGATCGGAAGAGCACACGTCTGAACTCCAGTCAC	rs400245	A
TCCCTACACGACGCTCTTCCGATCTNNAAACCATTAGGTCGAATGTAGTTGTGTAGCATGATAGTCANNGATCGGAAGAGCACACGTCTGAACTCCAGTCAC	rs961370	A
TCCCTACACGACGCTCTTCCGATCTNNTTATTTAACAGTACCTCTAAAAGATAACAACACAGAAAAANNGATCGGAAGAGCACACGTCTGAACTCCAGTCAC	rs10516580	A
TCCCTACACGACGCTCTTCCGATCTNNTAAAATCCACCTGACAACAAATATTTGAATGTCAGTATTANNGATCGGAAGAGCACACGTCTGAACTCCAGTCAC	rs17044092	A
TCCCTACACGACGCTCTTCCGATCTNNATAATGTCTTTTCCCTGGTAATTGTGTACGAATACAAAATNNGATCGGAAGAGCACACGTCTGAACTCCAGTCAC	rs17044095	A
TCCCTACACGACGCTCTTCCGATCTNNAACTTGATCTTAGGACAGAAAACATGCAAAGCAAAGTAAANNGATCGGAAGAGCACACGTCTGAACTCCAGTCAC	rs1395058	A
TCCCTACACGACGCTCTTCCGATCTNNGAGGCTGAGGCGGGCAGATAACTTGAGGTCAGCCATGGCCNNGATCGGAAGAGCACACGTCTGAACTCCAGTCAC	rs60403054	A
TCCCTACACGACGCTCTTCCGATCTNNAGCAACTCAAAAAAAGAAAAAGAAAAAAGAAAAAGAAAAANNGATCGGAAGAGCACACGTCTGAACTCCAGTCAC	rs59712691	A
TCCCTACACGACGCTCTTCCGATCTNNTGGATCCTGCTTACCTGCAAGAATGACTAATCAAGCACACNNGATCGGAAGAGCACACGTCTGAACTCCAGTCAC	rs17044108	A
TCCCTACACGACGCTCTTCCGATCTNNTGACTAATCAAGCACACTAATGCAGTTTGCTCCAAGCTGANNGATCGGAAGAGCACACGTCTGAACTCCAGTCAC	rs17044110	A
TCCCTACACGACGCTCTTCCGATCTNNAAAATATTTCATTTTCATTATGTCCTTTAGTGTTCTACTANNGATCGGAAGAGCACACGTCTGAACTCCAGTCAC	rs59346944	A
TCCCTACACGACGCTCTTCCGATCTNNCATTTTCATTATGTCCTTTAGTGTTCTACTACCATTATGANNGATCGGAAGAGCACACGTCTGAACTCCAGTCAC	rs58355643	A
TCCCTACACGACGCTCTTCCGATCTNNGGAGATCTTTTTAAGGGCGAGTAAACTGAAGGTGAGCTCANNGATCGGAAGAGCACACGTCTGAACTCCAGTCAC	rs4993300	A
TCCCTACACGACGCTCTTCCGATCTNNTGCAGGAGCTAAGCAAAAAACTAAGAATTATTTGATGACANNGATCGGAAGAGCACACGTCTGAACTCCAGTCAC	rs4993299	A
TCCCTACACGACGCTCTTCCGATCTNNAAGAGAATGTACTAGTTAAAATATGGACATATAATATCATNNGATCGGAAGAGCACACGTCTGAACTCCAGTCAC	rs58071934	A
TCCCTACACGACGCTCTTCCGATCTNNTTTTGAACATGAAATGAGAATATGCTCACAGAGTGCCTTGNNGATCGGAAGAGCACACGTCTGAACTCCAGTCAC	rs61709035	A
TCCCTACACGACGCTCTTCCGATCTNNGTAAAGTTTTAGGCTATTAAAAAGATTCCTGTACAGATCTNNGATCGGAAGAGCACACGTCTGAACTCCAGTCAC	rs28506478	A
TCCCTACACGACGCTCTTCCGATCTNNCAAACTGTTTTCCAAGTGAATGTATTGTGTTATCCTTTCANNGATCGGAAGAGCACACGTCTGAACTCCAGTCAC	rs28534500	A
TCCCTACACGACGCTCTTCCGATCTNNCTATAATAGGTATAAAATGATTTCTCATTGTGGCTTTAATNNGATCGGAAGAGCACACGTCTGAACTCCAGTCAC	rs28685575	A
TCCCTACACGACGCTCTTCCGATCTNNCTGTGGATCATTTCCCTTGATTGTGTTTTCAGGGTCAAAANNGATCGGAAGAGCACACGTCTGAACTCCAGTCAC	rs28609375	A
TCCCTACACGACGCTCTTCCGATCTNNGAAAATCAAGCTTTAAAAAATGGTAAAGGAGAAAATTTCANNGATCGGAAGAGCACACGTCTGAACTCCAGTCAC	rs12640653	A
TCCCTACACGACGCTCTTCCGATCTNNAATACCATTGATTGGCAGAAAGTAAAGACAGCGTAAGATCNNGATCGGAAGAGCACACGTCTGAACTCCAGTCAC	rs28398301	A
TCCCTACACGACGCTCTTCCGATCTNNAGACAGCGTAAGATCTCTAAAACATATCTCCATTGATATTNNGATCGGAAGAGCACACGTCTGAACTCCAGTCAC	rs28656265	A
TCCCTACACGACGCTCTTCCGATCTNNGGGGGAATGTAAAATGGAAATGGAAATAAGAGTAAATAAANNGATCGGAAGAGCACACGTCTGAACTCCAGTCAC	rs12501681	A
TCCCTACACGACGCTCTTCCGATCTNNGTTTCATAAACTACAGGACATGTCAGAGCCTATGCTATGTNNGATCGGAAGAGCACACGTCTGAACTCCAGTCAC	rs28544078	A
TCCCTACACGACGCTCTTCCGATCTNNGTGTTGAATCACACACAGTACTTGTGATGTGACCTCACAANNGATCGGAAGAGCACACGTCTGAACTCCAGTCAC	rs7439157	A
TCCCTACACGACGCTCTTCCGATCTNNCCTCACAAGAGTTTAATGGAGAGAGATCAGTTTAGTGAGGNNGATCGGAAGAGCACACGTCTGAACTCCAGTCAC	rs7439117	A
TCCCTACACGACGCTCTTCCGATCTNNACTCCAGCCTGGGCAACAAAAGTGAAACTCCATCTCAAAANNGATCGGAAGAGCACACGTCTGAACTCCAGTCAC	rs61086645	A
TCCCTACACGACGCTCTTCCGATCTNNCATCTCAAAAAAAATACTTAAAGTTCTAGGGTACGTGTGCNNGATCGGAAGAGCACACGTCTGAACTCCAGTCAC	rs58658012	A
TCCCTACACGACGCTCTTCCGATCTNNTCTGATGACCAGTGATGATAAGCATTTTTTTTCATATGTANNGATCGGAAGAGCACACGTCTGAACTCCAGTCAC	rs13353548	A
TCCCTACACGACGCTCTTCCGATCTNNCAGATGGTTGTAGATGTGCAGTGTTATTTCTGAGGCCTCTNNGATCGGAAGAGCACACGTCTGAACTCCAGTCAC	rs59395345	A
TCCCTACACGACGCTCTTCCGATCTNNAGGATTGTCTTGGCTATGCAGGCTCTTTTATGATTCCATANNGATCGGAAGAGCACACGTCTGAACTCCAGTCAC	rs60620552	A
TCCCTACACGACGCTCTTCCGATCTNNAGACATGCAACACCACACCAGGCTAATTTTTGTATTTTTANNGATCGGAAGAGCACACGTCTGAACTCCAGTCAC	rs13353589	A
TCCCTACACGACGCTCTTCCGATCTNNGTCCAGTGAGCCATGATCGAGCCACTGCACTCCAGCCTGTNNGATCGGAAGAGCACACGTCTGAACTCCAGTCAC	rs2351027	A
TCCCTACACGACGCTCTTCCGATCTNNGAGAGACAACCACAATCATATTGGCACAGATGGTGGTCATNNGATCGGAAGAGCACACGTCTGAACTCCAGTCAC	rs62329957	A
TCCCTACACGACGCTCTTCCGATCTNNGCACAGATGGTGGTCATGCAGACCAGTGTGGTAATGGTGTNNGATCGGAAGAGCACACGTCTGAACTCCAGTCAC	rs62329958	A
TCCCTACACGACGCTCTTCCGATCTNNGGATACCCTAATGTTCGGAAGTTGGTGAGTGAGTCGGAACNNGATCGGAAGAGCACACGTCTGAACTCCAGTCAC	rs10025409	A
TCCCTACACGACGCTCTTCCGATCTNNTTTGCAGAGTAATATATAAAGATATTTAAGTAAAATAGTTNNGATCGGAAGAGCACACGTCTGAACTCCAGTCAC	rs28714116	A
TCCCTACACGACGCTCTTCCGATCTNNCCTTAAAGTTTTAAAAAGCATTTCAAAGTGACCAATCCAANNGATCGGAAGAGCACACGTCTGAACTCCAGTCAC	rs17044131	A
TCCCTACACGACGCTCTTCCGATCTNNTCAGTCTCCCTATCAGAGTAGTTGCAGGATTATATGAGACNNGATCGGAAGAGCACACGTCTGAACTCCAGTCAC	rs13434948	A
TCCCTACACGACGCTCTTCCGATCTNNCTAGATGAGATAATTTTTTAAAAAATCACCATCTAATTTTNNGATCGGAAGAGCACACGTCTGAACTCCAGTCAC	rs13435336	A
TCCCTACACGACGCTCTTCCGATCTNNAATTTCAAACTTGAGCATAAAACTAACTCTAAAGATTTTTNNGATCGGAAGAGCACACGTCTGAACTCCAGTCAC	rs13435039	A
TCCCTACACGACGCTCTTCCGATCTNNAAAAAAAAAAAAAAAGAATATCGTCAATCCAAAGAGATTTNNGATCGGAAGAGCACACGTCTGAACTCCAGTCAC	rs28460618	A
TCCCTACACGACGCTCTTCCGATCTNNAAAGAGATTTAACATTGTTAGCTGCACAAGAAAATTTCACNNGATCGGAAGAGCACACGTCTGAACTCCAGTCAC	rs28485560	A
TCCCTACACGACGCTCTTCCGATCTNNTCACCTTTAGCTAGGGAAAAATTTCATTTACATACATTTTNNGATCGGAAGAGCACACGTCTGAACTCCAGTCAC	rs13435131	A
TCCCTACACGACGCTCTTCCGATCTNNCAATAACAAGAAAGAATCCAAGGAATTCTTTAGACCTGGCNNGATCGGAAGAGCACACGTCTGAACTCCAGTCAC	rs1505947	A
TCCCTACACGACGCTCTTCCGATCTNNCCTGGCTTCATTTTACTACAAAAGAAACTTGACTTACTGANNGATCGGAAGAGCACACGTCTGAACTCCAGTCAC	rs13435138	A
TCCCTACACGACGCTCTTCCGATCTNNGTTCTAACTATTAAATATAAGATATATAGTGCATAGTCACNNGATCGGAAGAGCACACGTCTGAACTCCAGTCAC	rs13435545	A
TCCCTACACGACGCTCTTCCGATCTNNGTAAAAATTACCTCCACGAAGCAAGCTGTGACAACATAAANNGATCGGAAGAGCACACGTCTGAACTCCAGTCAC	rs17044137	A
TCCCTACACGACGCTCTTCCGATCTNNTTTTCAGCTTATAAAACTTATTGTTTTTAATTTTTATGGANNGATCGGAAGAGCACACGTCTGAACTCCAGTCAC	rs9307375	A
TCCCTACACGACGCTCTTCCGATCTNNAAATATTATGTATGTTCTTATGAAGATAAAGGCAAAAACCNNGATCGGAAGAGCACACGTCTGAACTCCAGTCAC	rs34740455	A
TCCCTACACGACGCTCTTCCGATCTNNGGGGGTTTTGAATGGGGGGATGTTGTTTGTTTGTTTTGAGNNGATCGGAAGAGCACACGTCTGAACTCCAGTCAC	rs66484058	A
TCCCTACACGACGCTCTTCCGATCTNNTGCAAGTATTATTTTTTATAAATATATATTTTTTGTAACANNGATCGGAAGAGCACACGTCTGAACTCCAGTCAC	rs1472787	A
TCCCTACACGACGCTCTTCCGATCTNNTGTTTTCTATGCATATACAATATATGTAACTATAGAATGCNNGATCGGAAGAGCACACGTCTGAACTCCAGTCAC	rs1472786	A
TCCCTACACGACGCTCTTCCGATCTNNATTTACCCTAACTTTCAAGAATTTTTAACTTACTTTTATTNNGATCGGAAGAGCACACGTCTGAACTCCAGTCAC	rs4599481	A
TCCCTACACGACGCTCTTCCGATCTNNTACATTCTACTGACTTTTTATCTTTTGCTTCTGGTTTTAANNGATCGGAAGAGCACACGTCTGAACTCCAGTCAC	rs10008529	A
TCCCTACACGACGCTCTTCCGATCTNNTGAATGTGGTAGGATGATTAACTGAGATCCTAAATCCTTANNGATCGGAAGAGCACACGTCTGAACTCCAGTCAC	rs1395060	A
TCCCTACACGACGCTCTTCCGATCTNNTGAATTTTAATTCAGAGATACATACGGTACCTAAATACATNNGATCGGAAGAGCACACGTCTGAACTCCAGTCAC	rs6842731	A
TCCCTACACGACGCTCTTCCGATCTNNATCCAATTGAAAAGCACTCACTTAGAACACATCTCATTGCNNGATCGGAAGAGCACACGTCTGAACTCCAGTCAC	rs6843121	A
TCCCTACACGACGCTCTTCCGATCTNNAAACTTTATGGTTATAGTTATTATAGTAGAATAAAATATTNNGATCGGAAGAGCACACGTCTGAACTCCAGTCAC	rs6848635	A
TCCCTACACGACGCTCTTCCGATCTNNAAATATTGTTCTCTCTAATAAGCTTTCCCAAGAAAATTTTNNGATCGGAAGAGCACACGTCTGAACTCCAGTCAC	rs6848658	A
TCCCTACACGACGCTCTTCCGATCTNNGAAAATTTCAATTTAAATAATCCTCCACTATGCCCTATCCNNGATCGGAAGAGCACACGTCTGAACTCCAGTCAC	rs13121334	A
TCCCTACACGACGCTCTTCCGATCTNNCTTGAAAGATAATATTTTCAGCACAGCTCTTTCTCATTGCNNGATCGGAAGAGCACACGTCTGAACTCCAGTCAC	rs11722732	A
TCCCTACACGACGCTCTTCCGATCTNNGTTTATACATTAAAAAAAAATGTACTCCCAAATAAGAAGCNNGATCGGAAGAGCACACGTCTGAACTCCAGTCAC	rs17627161	A
TCCCTACACGACGCTCTTCCGATCTNNAAGTGTACTCCCAAATAAGAAGCTGGACTTAAGATATCCCNNGATCGGAAGAGCACACGTCTGAACTCCAGTCAC	rs3913815	A
TCCCTACACGACGCTCTTCCGATCTNNACCTAGAGTTACGAGATGAAATTTTGAACATTATGGGTTANNGATCGGAAGAGCACACGTCTGAACTCCAGTCAC	rs3913816	A
TCCCTACACGACGCTCTTCCGATCTNNTACCTCTATTTTTTTTTTAACTCTTGTCCAATGGGCTTCCNNGATCGGAAGAGCACACGTCTGAACTCCAGTCAC	rs3850471	A
TCCCTACACGACGCTCTTCCGATCTNNTAGTATCCTCTACTCATAGACCCATTTTAACTATCTCTACNNGATCGGAAGAGCACACGTCTGAACTCCAGTCAC	rs3905887	A
TCCCTACACGACGCTCTTCCGATCTNNAGAGCTGAAAGCTCAACTAAGATCATGAATTGCCTTTCCANNGATCGGAAGAGCACACGTCTGAACTCCAGTCAC	rs3850472	A
TCCCTACACGACGCTCTTCCGATCTNNAGGCAGTACCTAGAAAACAAGCACATTAAACCATCATTTGNNGATCGGAAGAGCACACGTCTGAACTCCAGTCAC	rs10434012	A
TCCCTACACGACGCTCTTCCGATCTNNTGGAAGGCTTTTGAACAGGAAATGAATAGCATTTTGTGAANNGATCGGAAGAGCACACGTCTGAACTCCAGTCAC	rs3850474	A
TCCCTACACGACGCTCTTCCGATCTNNTTTTAAAGCTTTTCAAAGCATGACTGTTGCATCATAATTGNNGATCGGAAGAGCACACGTCTGAACTCCAGTCAC	rs9994167	A
TCCCTACACGACGCTCTTCCGATCTNNATCATCCAGAAACTGCCAAAAGTGTTTGAAGCTGCACTGGNNGATCGGAAGAGCACACGTCTGAACTCCAGTCAC	rs3913817	A
TCCCTACACGACGCTCTTCCGATCTNNTAGGTAAATACTTCTGGCTATTAGTAAAATTCAAAGTGCTNNGATCGGAAGAGCACACGTCTGAACTCCAGTCAC	rs3850476	A
TCCCTACACGACGCTCTTCCGATCTNNCCTAGTGGTTTGGCTATCAATTAAAGTCCCTATTTATCACNNGATCGGAAGAGCACACGTCTGAACTCCAGTCAC	rs6819440	A
TCCCTACACGACGCTCTTCCGATCTNNCCATCATCTACAACTTTAGACTTTTTCTTTGCATATTTATNNGATCGGAAGAGCACACGTCTGAACTCCAGTCAC	rs6845600	A
TCCCTACACGACGCTCTTCCGATCTNNGCAAAAAACAATTTTTAAAAAGTAATTTATATGGGAAGAANNGATCGGAAGAGCACACGTCTGAACTCCAGTCAC	rs788653	A
TCCCTACACGACGCTCTTCCGATCTNNTACTTGTTAGTTTTTTCAAAAGAAACCAAGATGCCATATTNNGATCGGAAGAGCACACGTCTGAACTCCAGTCAC	rs1514658	A
TCCCTACACGACGCTCTTCCGATCTNNATGGTTAACTGAACACAATAAACAGGGAAGAACAGGCCTCNNGATCGGAAGAGCACACGTCTGAACTCCAGTCAC	rs1022286	A
TCCCTACACGACGCTCTTCCGATCTNNGGGTCTCTCTGTTTTGTGGAAGGAGCTTCCTTATTCTTCCNNGATCGGAAGAGCACACGTCTGAACTCCAGTCAC	rs788657	A
TCCCTACACGACGCTCTTCCGATCTNNGAGTTCTCTTTAACCATCTAATCAGTCTCAGTCAATACAGNNGATCGGAAGAGCACACGTCTGAACTCCAGTCAC	rs6854766	A
TCCCTACACGACGCTCTTCCGATCTNNATTGATTGCCACGTTAATGAAACATTTCCCTTTCCAGAACNNGATCGGAAGAGCACACGTCTGAACTCCAGTCAC	rs7674055	A
TCCCTACACGACGCTCTTCCGATCTNNAGGCGGCGGCGGACGCGTCATCGGGGGCCGCTGCTGGGTGNNGATCGGAAGAGCACACGTCTGAACTCCAGTCAC	rs13119545	A
TCCCTACACGACGCTCTTCCGATCTNNTACAACTGTAAGAATCTTCATCATGTGCAGTGGCTTAAGCNNGATCGGAAGAGCACACGTCTGAACTCCAGTCAC	rs2175971	A
TCCCTACACGACGCTCTTCCGATCTNNGCCGTAAGCCACCATGCCCAGCCCCATCTATTTCTTTAAANNGATCGGAAGAGCACACGTCTGAACTCCAGTCAC	rs13124454	A
TCCCTACACGACGCTCTTCCGATCTNNTGTTTAGCTATTTGGCCTAAATACTAGTAAACTGCTTTGGNNGATCGGAAGAGCACACGTCTGAACTCCAGTCAC	rs7661210	A
TCCCTACACGACGCTCTTCCGATCTNNAAATCCACCAAAAGCAAGAAGGCGATGAAAGCAACCTCTGNNGATCGGAAGAGCACACGTCTGAACTCCAGTCAC	rs1113677	A
TCCCTACACGACGCTCTTCCGATCTNNAAGAAATCTTTCCCAGAAAACTCCTTGGAGATTTTTCCTCNNGATCGGAAGAGCACACGTCTGAACTCCAGTCAC	rs13145902	A
TCCCTACACGACGCTCTTCCGATCTNNTCCTGACCTCAGGTGATCCACCTGCCTTGGCCTCCCAAAGNNGATCGGAAGAGCACACGTCTGAACTCCAGTCAC	rs11098434	A
TCCCTACACGACGCTCTTCCGATCTNNGTTTGCAGTGAGCTGAGATAGCACCACTGCACTCCAGCTTNNGATCGGAAGAGCACACGTCTGAACTCCAGTCAC	rs7654228	A
TCCCTACACGACGCTCTTCCGATCTNNTTTCTAGAAGCTTTTAAACAAAAAAATTTCAAGTGTTATTNNGATCGGAAGAGCACACGTCTGAACTCCAGTCAC	rs12512082	A
TCCCTACACGACGCTCTTCCGATCTNNATAAGGTTTAAGAGCTCAGATTTGGATTCAAATAGGCTTTNNGATCGGAAGAGCACACGTCTGAACTCCAGTCAC	rs7683979	A
TCCCTACACGACGCTCTTCCGATCTNNAGGAACTGGAGGATGTACTAGAAGAACTCAGGGGTGCACANNGATCGGAAGAGCACACGTCTGAACTCCAGTCAC	rs4863698	A
TCCCTACACGACGCTCTTCCGATCTNNATGGCAACACCCCGTCTATACTAAAAATATTAAAAAAATTNNGATCGGAAGAGCACACGTCTGAACTCCAGTCAC	rs1840540	A
TCCCTACACGACGCTCTTCCGATCTNNGAGGTACCAGAAACAATGAAGGTACTGTAAGGCCTCAAAGNNGATCGGAAGAGCACACGTCTGAACTCCAGTCAC	rs1531070	A
TCCCTACACGACGCTCTTCCGATCTNNCCACTAGCCACATGTGGCTATTGAACACTTGAAATGTGGCNNGATCGGAAGAGCACACGTCTGAACTCCAGTCAC	rs6834463	A
TCCCTACACGACGCTCTTCCGATCTNNGTGAATCGCCTCCTGTTCCAGGGCCTTCAATCACCCTTCTNNGATCGGAAGAGCACACGTCTGAACTCCAGTCAC	rs11100326	A
TCCCTACACGACGCTCTTCCGATCTNNAATTTTGCCTCGCTATTCCACACCGGAACCCTTCCCTCCANNGATCGGAAGAGCACACGTCTGAACTCCAGTCAC	rs1455480	A
TCCCTACACGACGCTCTTCCGATCTNNAAATAAAGCTGGGCCTACTATCTTACCTGTGAGTGCACTGNNGATCGGAAGAGCACACGTCTGAACTCCAGTCAC	rs4863518	A
TCCCTACACGACGCTCTTCCGATCTNNACTCTCTTACCTGTGAGTGAACTGGGTAGGGGCCTAGGGTNNGATCGGAAGAGCACACGTCTGAACTCCAGTCAC	rs4863519	A
TCCCTACACGACGCTCTTCCGATCTNNGGCTGAGGCAACATCTCCCAGAAGCTCAGGAGCACCTGGGNNGATCGGAAGAGCACACGTCTGAACTCCAGTCAC	rs4863699	A
TCCCTACACGACGCTCTTCCGATCTNNGCTCTGAGGAGAACAGCCCAAAAGAGGCCCTACATAAGCCNNGATCGGAAGAGCACACGTCTGAACTCCAGTCAC	rs17290188	A
TCCCTACACGACGCTCTTCCGATCTNNCCCTACATAAGCCTTGTGTAGCCTTTAATGTGTGTAGTATNNGATCGGAAGAGCACACGTCTGAACTCCAGTCAC	rs17368602	A
TCCCTACACGACGCTCTTCCGATCTNNCATGAACCTAAACTGTTTTAATAGTCCTTGAAGTAAGTCANNGATCGGAAGAGCACACGTCTGAACTCCAGTCAC	rs2320536	A
TCCCTACACGACGCTCTTCCGATCTNNAGTCTCCACTCTTCCCACAATGTCCCTCCTGCATTGCTCTNNGATCGGAAGAGCACACGTCTGAACTCCAGTCAC	rs13107432	A
TCCCTACACGACGCTCTTCCGATCTNNAACAAAATCTATAAAATATATGATGTCATGTAAAAAGCAGNNGATCGGAAGAGCACACGTCTGAACTCCAGTCAC	rs13135042	A
TCCCTACACGACGCTCTTCCGATCTNNGTAGTAGAAGCAGATAAGAAAATTCAGGTATCTTCTATTANNGATCGGAAGAGCACACGTCTGAACTCCAGTCAC	rs975136	A
TCCCTACACGACGCTCTTCCGATCTNNAGAATCTTAGCAGCTTGAGAAGATAGATTTACTTCTCATTNNGATCGGAAGAGCACACGTCTGAACTCCAGTCAC	rs17660975	A
TCCCTACACGACGCTCTTCCGATCTNNTATGATAAAATGAATTAGCATACTTTAGATGACTTTTAGANNGATCGGAAGAGCACACGTCTGAACTCCAGTCAC	rs62328348	A
TCCCTACACGACGCTCTTCCGATCTNNAAATGGGTACGCTCTATTGACTCTAGAATTACACAATGTCNNGATCGGAAGAGCACACGTCTGAACTCCAGTCAC	rs13102150	A
TCCCTACACGACGCTCTTCCGATCTNNTAGTGAGAGAGAAAAGGGCATTCTTTCTATTATTATTAAGNNGATCGGAAGAGCACACGTCTGAACTCCAGTCAC	rs68120121	A
TCCCTACACGACGCTCTTCCGATCTNNCCCTTCAATGTTCTCCTTTATCTTATATATATTTAGAGTANNGATCGGAAGAGCACACGTCTGAACTCCAGTCAC	rs72691107	A
TCCCTACACGACGCTCTTCCGATCTNNAGGCATGAGGGGAGATGGAACCTTGGCATGAGTAAAGGAGNNGATCGGAAGAGCACACGTCTGAACTCCAGTCAC	rs72691109	A
TCCCTACACGACGCTCTTCCGATCTNNGCATTATTCAGAGAGAAAAATATTTGTTGAGAGAAAAATANNGATCGGAAGAGCACACGTCTGAACTCCAGTCAC	rs28436763	A
TCCCTACACGACGCTCTTCCGATCTNNAAAATTATTTGTTGAGAGAAAAATACGAGTAACCAGTACTNNGATCGGAAGAGCACACGTCTGAACTCCAGTCAC	rs28600753	A
TCCCTACACGACGCTCTTCCGATCTNNAAACAGCTTGTTATCAGTTAAAGGAAACCTCTGACTTTTCNNGATCGGAAGAGCACACGTCTGAACTCCAGTCAC	rs60129418	A
TCCCTACACGACGCTCTTCCGATCTNNAGGCTAGGAGTTCGAGATAACCTGGGCCACATAGCAAAACNNGATCGGAAGAGCACACGTCTGAACTCCAGTCAC	rs1017555	A
TCCCTACACGACGCTCTTCCGATCTNNAGTCATTAGAAAATAATTCATTTTACTGAAAATAAGTAGTNNGATCGGAAGAGCACACGTCTGAACTCCAGTCAC	rs1017556	A
TCCCTACACGACGCTCTTCCGATCTNNCTCTCACAATTTTTCATTTAGGAATAACGTTCTGTGAACTNNGATCGGAAGAGCACACGTCTGAACTCCAGTCAC	rs6817742	A
TCCCTACACGACGCTCTTCCGATCTNNGTTCACCTTTAATTTCAAGACAATGCTGTATAATATTAGTNNGATCGGAAGAGCACACGTCTGAACTCCAGTCAC	rs28714559	A
TCCCTACACGACGCTCTTCCGATCTNNTCACCTTTAATTTCAAGACAATGCTGTATAATATTAGTCTNNGATCGGAAGAGCACACGTCTGAACTCCAGTCAC	rs28482195	A
TCCCTACACGACGCTCTTCCGATCTNNAAATTTAACATAAAAATACACTTTGTACCTCTGGTAGAATNNGATCGGAAGAGCACACGTCTGAACTCCAGTCAC	rs28632195	A
TCCCTACACGACGCTCTTCCGATCTNNATATCCCCTTTATCACTTTATATTGTGTCTATTTAATTCTNNGATCGGAAGAGCACACGTCTGAACTCCAGTCAC	rs28609047	A
TCCCTACACGACGCTCTTCCGATCTNNAACCAGACACACAAAAAGAAAATTTTAGACCAATATCCCTNNGATCGGAAGAGCACACGTCTGAACTCCAGTCAC	rs28421913	A
TCCCTACACGACGCTCTTCCGATCTNNAAAATCCTCAATAAAATATAGGCAAACCAAATCCAGCAGCNNGATCGGAAGAGCACACGTCTGAACTCCAGTCAC	rs6819562	A
TCCCTACACGACGCTCTTCCGATCTNNAGCAGCACATCAAAAAGCTAATCCACCATGATCAAGTGGGNNGATCGGAAGAGCACACGTCTGAACTCCAGTCAC	rs6824774	A
TCCCTACACGACGCTCTTCCGATCTNNTTATCCACCATGATCAAGTAGGCTTCATCCCTGTTATGCANNGATCGGAAGAGCACACGTCTGAACTCCAGTCAC	rs6841723	A
TCCCTACACGACGCTCTTCCGATCTNNCAAGTGGGCTTCATCCCTGATATGCAAGGCTGGTTCAACANNGATCGGAAGAGCACACGTCTGAACTCCAGTCAC	rs6824793	A
TCCCTACACGACGCTCTTCCGATCTNNAAGTGGGCTTCATCCCTGTAATGCAAGGCTGGTTCAACATNNGATCGGAAGAGCACACGTCTGAACTCCAGTCAC	rs6824796	A
TCCCTACACGACGCTCTTCCGATCTNNCAGCCCTTCATGCTAAAAAATCTCAACAAACTAGGTATTGNNGATCGGAAGAGCACACGTCTGAACTCCAGTCAC	rs1813334	A
TCCCTACACGACGCTCTTCCGATCTNNTAGGTATTGATGGGACGTAACTCAAAATAATAAGAGCTATNNGATCGGAAGAGCACACGTCTGAACTCCAGTCAC	rs3899774	A
TCCCTACACGACGCTCTTCCGATCTNNCAGCAAAGTCTCAGGATACAAAATCAACGTGCAAAAATCANNGATCGGAAGAGCACACGTCTGAACTCCAGTCAC	rs1899952	A
TCCCTACACGACGCTCTTCCGATCTNNCTTATACAAAAATTAACTCAAGATGGATTAAAGACTTAAANNGATCGGAAGAGCACACGTCTGAACTCCAGTCAC	rs34785398	A
TCCCTACACGACGCTCTTCCGATCTNNGACAAATGGGATCTAATTGAACTAAAGAGCTTCTGCAAAGNNGATCGGAAGAGCACACGTCTGAACTCCAGTCAC	rs35968388	A
TCCCTACACGACGCTCTTCCGATCTNNACAGGCAACCTACAGAATGAGAGAAAATTTTTGCAATCACNNGATCGGAAGAGCACACGTCTGAACTCCAGTCAC	rs35528241	A
TCCCTACACGACGCTCTTCCGATCTNNCAGGCAGGGCACGGTGGCTAATGCCTGTAATCCCAGCACTNNGATCGGAAGAGCACACGTCTGAACTCCAGTCAC	rs112014751	A
TCCCTACACGACGCTCTTCCGATCTNNCACTTTGGGAGGCTGAGGCAGGTGGATCACAAGGTCAGGANNGATCGGAAGAGCACACGTCTGAACTCCAGTCAC	rs11929843	A
TCCCTACACGACGCTCTTCCGATCTNNGGCAGAGCTTGCAGTGAGCAGAGAATGCACCTCTGCACTCNNGATCGGAAGAGCACACGTCTGAACTCCAGTCAC	rs79314082	A
TCCCTACACGACGCTCTTCCGATCTNNCCTCTGCACTCCAGCCTGGACAACAGAGTGAGACGCCATCNNGATCGGAAGAGCACACGTCTGAACTCCAGTCAC	rs75169626	A
TCCCTACACGACGCTCTTCCGATCTNNCTCTGCACTCCAGCCTGGGAAACAGAGTGAGACGCCATCTNNGATCGGAAGAGCACACGTCTGAACTCCAGTCAC	rs74472408	A
TCCCTACACGACGCTCTTCCGATCTNNCTCATACCAGTTAGAATGGAGATCATTAAAAAGTCAGGAANNGATCGGAAGAGCACACGTCTGAACTCCAGTCAC	rs11930954	A
TCCCTACACGACGCTCTTCCGATCTNNAGTTCAACCATTGTGGAAGACAGTGTGGCAATTCCTCAAGNNGATCGGAAGAGCACACGTCTGAACTCCAGTCAC	rs11931007	A
TCCCTACACGACGCTCTTCCGATCTNNAAATACCATTTGACCCAGCAATCCCATTACTGGGTATATANNGATCGGAAGAGCACACGTCTGAACTCCAGTCAC	rs77471149	A
TCCCTACACGACGCTCTTCCGATCTNNAATGTGGTACATACACACCATGGAATACTATGCAGCCATGNNGATCGGAAGAGCACACGTCTGAACTCCAGTCAC	rs112189726	A
TCCCTACACGACGCTCTTCCGATCTNNCTGAGCAACCTATCACAAGAACAGGAAACCAGACACCGCANNGATCGGAAGAGCACACGTCTGAACTCCAGTCAC	rs75700221	A
TCCCTACACGACGCTCTTCCGATCTNNTCACAAGGACAGGAAACCAAACACCGCATGTTCTCACTCANNGATCGGAAGAGCACACGTCTGAACTCCAGTCAC	rs78310696	A
TCCCTACACGACGCTCTTCCGATCTNNACACCAACATGGCACATGTATACATATGTAACAAACCTGANNGATCGGAAGAGCACACGTCTGAACTCCAGTCAC	rs61285555	A
TCCCTACACGACGCTCTTCCGATCTNNTCACCTGAATCCAGAATTCATTAATCTAGTGGCATTTTACNNGATCGGAAGAGCACACGTCTGAACTCCAGTCAC	rs6846167	A
TCCCTACACGACGCTCTTCCGATCTNNAAGCTTAGCTGAGAAGAATATAACATGATTAATTAGAGTANNGATCGGAAGAGCACACGTCTGAACTCCAGTCAC	rs56364163	A
TCCCTACACGACGCTCTTCCGATCTNNATACCTACATATACTTTAAAAAATTTGTCATAGACTTCTGNNGATCGGAAGAGCACACGTCTGAACTCCAGTCAC	rs1948880	A
TCCCTACACGACGCTCTTCCGATCTNNTCCTTCTTTTTTGGAGCTCAATGGGCCCTAAATACTTACTNNGATCGGAAGAGCACACGTCTGAACTCCAGTCAC	rs1948881	A
TCCCTACACGACGCTCTTCCGATCTNNAGTATCCTATCAAGTAAGAAAAAATAGTTCTGGAAGGGACNNGATCGGAAGAGCACACGTCTGAACTCCAGTCAC	rs1965836	A
TCCCTACACGACGCTCTTCCGATCTNNACAGATTTTTTTTAACAAGAGCCTTATTAAATATTTCATTNNGATCGGAAGAGCACACGTCTGAACTCCAGTCAC	rs10019912	A
TCCCTACACGACGCTCTTCCGATCTNNAGTTAGAGGCTGATGTTCTATCTTCATATAACAATTCTTTNNGATCGGAAGAGCACACGTCTGAACTCCAGTCAC	rs10020098	A
TCCCTACACGACGCTCTTCCGATCTNNGACAGTATGAGTCCCGTCTATGCTACTTATATCCTAAGTGNNGATCGGAAGAGCACACGTCTGAACTCCAGTCAC	rs28611177	A
TCCCTACACGACGCTCTTCCGATCTNNTTATAGAGACTGGTGAAGTATGACAGAATTAAAGAATATGNNGATCGGAAGAGCACACGTCTGAACTCCAGTCAC	rs28394479	A
TCCCTACACGACGCTCTTCCGATCTNNTATCTCCCTGAGGATTTCCAGGCTGTGGTTTTTAAGGGGANNGATCGGAAGAGCACACGTCTGAACTCCAGTCAC	rs28612635	A
TCCCTACACGACGCTCTTCCGATCTNNTGATTCAGCTCCTCATGGGATCCTTCAGATCAGCTGACATNNGATCGGAAGAGCACACGTCTGAACTCCAGTCAC	rs28758520	A
TCCCTACACGACGCTCTTCCGATCTNNTGAGGAAGGGGTCAGAGAGAACTAGCACTAATAATTAATGNNGATCGGAAGAGCACACGTCTGAACTCCAGTCAC	rs28360741	A
TCCCTACACGACGCTCTTCCGATCTNNGGGGTCAGAGAGCACTAGCACTAATAATTAATGTTGAACGNNGATCGGAAGAGCACACGTCTGAACTCCAGTCAC	rs28605758	A
TCCCTACACGACGCTCTTCCGATCTNNACTAATAATTAATGTTGAAAGTGTTGCAAGCTTGGTTTATNNGATCGGAAGAGCACACGTCTGAACTCCAGTCAC	rs28454512	A
TCCCTACACGACGCTCTTCCGATCTNNTTATGTTTATAGGGACAGTATCACAACTACATCTTGGGTCNNGATCGGAAGAGCACACGTCTGAACTCCAGTCAC	rs28510666	A
TCCCTACACGACGCTCTTCCGATCTNNACTCCCATGCATATTCTTGAGCATATAAGAACACGGAAGTNNGATCGGAAGAGCACACGTCTGAACTCCAGTCAC	rs28376086	A
TCCCTACACGACGCTCTTCCGATCTNNAGATCCTTTGGAAGCCAAGATCTGCAATCTTTTTAAATCANNGATCGGAAGAGCACACGTCTGAACTCCAGTCAC	rs2166186	A
TCCCTACACGACGCTCTTCCGATCTNNTCTTCTGGTTAAATTTGGAAAGACATTATAAAAAGGGGAANNGATCGGAAGAGCACACGTCTGAACTCCAGTCAC	rs2120842	A
TCCCTACACGACGCTCTTCCGATCTNNGGAAACACATTTATAAGTTATCTCATTGCCATCATTAACANNGATCGGAAGAGCACACGTCTGAACTCCAGTCAC	rs1553559	A
TCCCTACACGACGCTCTTCCGATCTNNGTTCTTCCTTTGCTGTCACACCATTGTGAGCTTATATTCTNNGATCGGAAGAGCACACGTCTGAACTCCAGTCAC	rs1973535	A
TCCCTACACGACGCTCTTCCGATCTNNAAAGCATGGGGTTTCGCTAAGTTAGCCAGGCTGGTCCTGANNGATCGGAAGAGCACACGTCTGAACTCCAGTCAC	rs72981502	A
TCCCTACACGACGCTCTTCCGATCTNNACACTTAAGGTCTAATGTCATTTATTTTGGGAACATGAAGNNGATCGGAAGAGCACACGTCTGAACTCCAGTCAC	rs60540762	A
TCCCTACACGACGCTCTTCCGATCTNNGTCTAATGTCCTTTATTTTAGGAACATGAAGGTTGGAATTNNGATCGGAAGAGCACACGTCTGAACTCCAGTCAC	rs60597763	A
TCCCTACACGACGCTCTTCCGATCTNNAAAGACAGTGTGGCGATTCATCAAAGACCTAGAGACAGAANNGATCGGAAGAGCACACGTCTGAACTCCAGTCAC	rs59548855	A
TCCCTACACGACGCTCTTCCGATCTNNAGACAGAAATATCATTTGAACCAACAATCTCATTACTGGGNNGATCGGAAGAGCACACGTCTGAACTCCAGTCAC	rs57589683	A
TCCCTACACGACGCTCTTCCGATCTNNAGAATCTACCTTTCAAAACAGAGGTTTGTTTTTAAAAGCANNGATCGGAAGAGCACACGTCTGAACTCCAGTCAC	rs72983417	A
TCCCTACACGACGCTCTTCCGATCTNNTGTTGACTTTCCAATTTCTAACTCAACAATTAGGAAAAGANNGATCGGAAGAGCACACGTCTGAACTCCAGTCAC	rs28567003	A
TCCCTACACGACGCTCTTCCGATCTNNATGGTTTGGAAGAGATTGAATGTTATAGTTTACAGGTTTTNNGATCGGAAGAGCACACGTCTGAACTCCAGTCAC	rs28739524	A
TCCCTACACGACGCTCTTCCGATCTNNAAAAAATGAAATTTTAATTAGTCTTACATCACTACCCTTANNGATCGGAAGAGCACACGTCTGAACTCCAGTCAC	rs28733207	A
TCCCTACACGACGCTCTTCCGATCTNNACTGACCTTAATATGTAAGAGTTTTGTTAATACTGCTGTANNGATCGGAAGAGCACACGTCTGAACTCCAGTCAC	rs77931854	A
TCCCTACACGACGCTCTTCCGATCTNNAAGATGTAGGCTGGGAGGCAAGGCCAGTCTAGTCTTTTCANNGATCGGAAGAGCACACGTCTGAACTCCAGTCAC	rs12331312	A
TCCCTACACGACGCTCTTCCGATCTNNAATCATCATGGTAACCTCCAGTAGATTATTTTTTTACTATNNGATCGGAAGAGCACACGTCTGAACTCCAGTCAC	rs77878547	A
TCCCTACACGACGCTCTTCCGATCTNNGATATTCCACCACAAAAGAAGTGAAAATGGCCAGTCCTTGNNGATCGGAAGAGCACACGTCTGAACTCCAGTCAC	rs6858729	A
TCCCTACACGACGCTCTTCCGATCTNNAAAAGAAGTGAAAATGGCCAGTCCTTGCCTTAAGTGATGANNGATCGGAAGAGCACACGTCTGAACTCCAGTCAC	rs28875567	A
[truncated: 11,040 more rows]

## Sheet: Significant_Ki_change
base_rsID	TF	Ref_value (Ki)	Alt_value (Ki)	Binding_Change	FC_log2	RefAllele	AltAllele
rs2332402	TBX5	0.00153	0.00699	increase	1.89168	A	G
rs116566032	TBX5	0.0011	0.00527	increase	1.86082	G	A
rs9364957	TBX5	0.00022	0.00176	increase	1.67207	T	G
rs827867	TBX5	0.00052	0.00252	increase	1.58088	A	G
rs4859901	TBX5	0.00072	0.00302	increase	1.54097	G	A
rs640046	TBX5	0.00082	0.00317	increase	1.48635	G	A
rs9361157	TBX5	0.00039	0.00191	increase	1.45345	T	C
rs28394479	TBX5	0.00027	0.00148	increase	1.38086	C	G
rs11904437	TBX5	0.00033	0.00159	increase	1.34904	A	C
rs11816084	TBX5	0.00039	0.00167	increase	1.30106	C	A
rs7723509	TBX5	0.00042	0.00166	increase	1.24567	G	C
rs7697219	TBX5	0.00095	0.00286	increase	1.22138	G	A
rs839150	TBX5	0.00034	0.00139	increase	1.18515	A	G
rs4709189	TBX5	0.00037	0.00136	increase	1.1103	A	C
rs2465147	TBX5	0.00119	0.00297	increase	1.04485	T	C
rs2535326	TBX5	0.001	0.00254	increase	1.02684	C	T
rs149976351	TBX5	0.001	0.00247	increase	0.993055	C	A
rs6869034	TBX5	0.00116	0.00276	increase	0.980453	G	A
rs13411840	TBX5	0.00082	0.00208	increase	0.975313	A	C
rs2214412	TBX5	0.00049	0.00143	increase	0.974411	G	A
rs6838630	TBX5	0.0016	0.00361	increase	0.974069	A	G
rs191065931	TBX5	0.00022	0.00087	increase	0.943329	A	G
rs16888155	TBX5	0.0005	0.00138	increase	0.921494	T	C
rs35941327	TBX5	0.00057	0.00151	increase	0.919625	G	A
rs7032149	TBX5	0.00047	0.00131	increase	0.910937	T	C
rs4144361	TBX5	0.00026	0.00091	increase	0.905625	A	G
rs649254	TBX5	0.00036	0.00107	increase	0.880472	T	C
rs2315074	TBX5	0.00031	0.00097	increase	0.872605	T	A
rs12103303	TBX5	0.00029	0.00093	increase	0.869161	A	G
rs10856991	TBX5	0.00046	0.00124	increase	0.868724	C	A
rs78091320	TBX5	0.00013	0.00061	increase	0.833038	A	C
rs1973535	TBX5	0.0003	0.00091	increase	0.830099	T	A
rs7963957	TBX5	0.00028	0.00085	increase	0.803908	C	T
rs77931854	TBX5	0.00029	0.00086	increase	0.795925	C	T
rs17136841	TBX5	0.00025	0.00079	increase	0.7953	A	G
rs6867941	TBX5	0.001	0.00036	decrease	-0.813988	A	G
rs61795163	TBX5	0.00145	0.00058	decrease	-0.861934	C	G
rs67955617	TBX5	0.00169	0.00071	decrease	-0.86441	T	C
rs66484058	TBX5	0.00081	0.00022	decrease	-0.877951	G	A
rs28366144	TBX5	0.00181	0.00074	decrease	-0.906121	A	T
rs1530697	TBX5	0.00104	0.00031	decrease	-0.940429	G	A
rs75292430	TBX5	0.00103	0.0003	decrease	-0.949213	G	A
rs3911240	TBX5	0.00239	0.00099	decrease	-0.963201	G	A
rs56265831	TBX5	0.00111	0.00033	decrease	-0.969329	T	G
rs2452814	TBX5	0.00084	0.00017	decrease	-1.01725	C	A
rs863392	TBX5	0.00111	0.0003	decrease	-1.02349	G	A
rs9364954	TBX5	0.00116	0.00032	decrease	-1.03171	G	A
rs7135741	TBX5	0.00113	0.00025	decrease	-1.13651	G	T
rs17002828	TBX5	0.00115	0.00023	decrease	-1.19412	G	A
rs9792617	TBX5	0.00202	0.00061	decrease	-1.19443	A	G
rs28544078	TBX5	0.00137	0.00032	decrease	-1.20511	G	T
rs73242632	TBX5	0.0014	0.00031	decrease	-1.24632	C	A
rs4939392	TBX5	0.00129	0.00026	decrease	-1.25334	T	A
rs11935933	TBX5	0.00257	0.00077	decrease	-1.28399	G	A
rs76418747	TBX5	0.00127	0.00022	decrease	-1.31669	C	T
rs1806875	TBX5	0.00226	0.00055	decrease	-1.40782	T	C
rs72795039	TBX5	0.00173	0.00032	decrease	-1.4611	G	A
rs12909503	TBX5	0.00413	0.00089	decrease	-1.74745	T	C
rs6455576	TBX5	0.00168	0.00016	decrease	-1.74817	C	G
rs34444956	TBX5	0.00254	0.00028	decrease	-1.98445	C	T
rs79010858	TBX5	0.00297	0.00033	decrease	-2.08482	C	T
rs827855	TBX5	0.00357	0.00024	decrease	-2.48487	G	A
rs56924116	GATA4	0.00459	0.06882	increase	2.62948	G	A
rs16984782	GATA4	0.00106	0.03727	increase	2.34804	C	A
rs2844652	GATA4	0.0048	0.05247	increase	2.25888	C	A
rs73827437	GATA4	0.00764	0.06567	increase	2.25119	C	T
rs10052804	GATA4	0.00248	0.03388	increase	2.02053	A	T
rs585302	GATA4	0.00862	0.05839	increase	2.01179	G	T
rs10873389	GATA4	0.00144	0.02428	increase	1.79677	G	A
rs13353548	GATA4	0.00271	0.02824	increase	1.77877	G	T
rs2896074	GATA4	0.00185	0.02424	increase	1.73227	G	A
rs828004	GATA4	0.0022	0.02351	increase	1.64756	G	T
rs67900149	GATA4	0.00201	0.02129	increase	1.56913	A	T
rs6575379	GATA4	0.0021	0.01807	increase	1.38664	C	A
rs72795054	GATA4	0.00069	0.01274	increase	1.27555	G	A
rs7135177	GATA4	0.00698	0.02594	increase	1.19134	G	A
rs41308639	GATA4	0.00108	0.0123	increase	1.17943	A	T
rs36211802	GATA4	0.00102	0.01128	increase	1.11405	C	T
rs62108785	GATA4	0.00278	0.01472	increase	1.09056	G	A
rs117847346	GATA4	0.00214	0.0129	increase	1.05903	C	A
rs6865511	GATA4	0.00276	0.01403	increase	1.04838	C	T
rs4661575	GATA4	0.01667	0.04117	increase	1.00117	C	T
rs3850471	GATA4	0.00046	0.00872	increase	1.00084	C	T
rs6854989	GATA4	0.00235	0.01213	increase	0.974129	C	T
rs828003	GATA4	0.00139	0.01005	increase	0.958516	C	T
rs7844800	GATA4	0.00413	0.01505	increase	0.938153	A	G
rs28609375	GATA4	0.00241	0.01127	increase	0.90195	C	A
rs3847800	GATA4	0.00335	0.01246	increase	0.862147	A	G
rs147179715	GATA4	0.00723	0.01896	increase	0.832635	G	A
rs36054569	GATA4	0.0008	0.0075	increase	0.831826	A	T
rs7762096	GATA4	0.00347	0.01179	increase	0.79815	C	T
rs9318296	GATA4	0.00618	0.01645	increase	0.795038	C	T
rs73912718	GATA4	0.04299	0.02157	gray	-0.790399	C	T
rs863392	GATA4	0.03363	0.01602	decrease	-0.798749	G	A
rs9352397	GATA4	0.01367	0.00433	decrease	-0.824237	C	T
rs11210570	GATA4	0.03151	0.01438	decrease	-0.825908	A	G
rs9361153	GATA4	0.03106	0.01405	decrease	-0.830929	G	A
rs7831519	GATA4	0.03499	0.01579	decrease	-0.859361	G	A
rs12193434	GATA4	0.01288	0.00325	decrease	-0.904771	T	C
rs3131030	GATA4	0.00804	0.00061	decrease	-0.914164	A	C
rs3130653	GATA4	0.03216	0.01338	decrease	-0.91616	C	A
rs9667664	GATA4	0.0126	0.00267	decrease	-0.962949	G	C
rs1949370	GATA4	0.01122	0.00189	decrease	-0.973647	C	A
rs8037496	GATA4	0.02554	0.00868	decrease	-1.01696	A	G
rs6854766	GATA4	0.01061	0.0013	decrease	-1.01732	T	C
rs13151026	GATA4	0.02396	0.00775	decrease	-1.03075	T	G
rs4388114	GATA4	0.01055	0.00106	decrease	-1.05121	T	C
rs7870016	GATA4	0.07983	0.03399	decrease	-1.06844	T	A
rs28893806	GATA4	0.01132	0.00123	decrease	-1.08309	T	G
rs689277	GATA4	0.03729	0.0119	decrease	-1.19501	A	G
rs839154	GATA4	0.01761	0.00259	decrease	-1.29099	T	A
rs839148	GATA4	0.02924	0.00677	decrease	-1.34666	A	G
rs6824774	GATA4	0.04754	0.01326	decrease	-1.39422	T	A
rs73242620	GATA4	0.04255	0.01075	decrease	-1.44104	A	G
rs11596712	GATA4	0.02755	0.00478	decrease	-1.49128	A	C
rs16872108	GATA4	0.03439	0.00641	decrease	-1.57064	A	T
rs73242621	GATA4	0.02403	0.00243	decrease	-1.6385	A	G
rs3130651	GATA4	0.02729	0.00305	decrease	-1.69424	T	C
rs10488555	GATA4	0.0429	0.00457	decrease	-2.03598	T	C
rs57246363	GATA4	0.11396	0.01432	decrease	-2.46113	A	G
rs59119749	GATA4	0.08406	0.00195	decrease	-3.23723	G	C
rs4863698	NKX2-5	0.00186	0.00848	increase	1.71483	G	T
rs6758103	NKX2-5	0.00139	0.00598	increase	1.53043	G	A
rs7350789	NKX2-5	0.00113	0.0049	increase	1.45267	G	A
rs4918896	NKX2-5	0.00059	0.00314	increase	1.35851	G	A
rs4738588	NKX2-5	0.00084	0.00359	increase	1.30018	G	A
rs839151	NKX2-5	0.00156	0.0053	increase	1.2859	C	G
rs60403054	NKX2-5	0.00112	0.00415	increase	1.26461	T	C
rs2137643	NKX2-5	0.00172	0.00545	increase	1.23348	T	C
rs28394479	NKX2-5	0.001	0.00369	increase	1.21318	C	G
rs4417999	NKX2-5	0.00135	0.00446	increase	1.20234	G	A
rs7303642	NKX2-5	0.00076	0.00307	increase	1.19104	C	A
rs2353240	NKX2-5	0.00154	0.00442	increase	1.08146	A	G
rs72775239	NKX2-5	0.00122	0.00367	increase	1.05933	C	T
rs7587235	NKX2-5	0.00113	0.00328	increase	0.993261	T	G
rs2174080	NKX2-5	0.00076	0.00249	increase	0.971582	C	G
rs13386758	NKX2-5	0.00087	0.00258	increase	0.922336	C	A
rs71402285	NKX2-5	0.00114	0.00305	increase	0.907702	G	A
rs3131029	NKX2-5	0.00103	0.00284	increase	0.906352	A	G
rs9543736	NKX2-5	0.00162	0.00394	increase	0.904662	T	A
rs7826185	NKX2-5	0.00125	0.00323	increase	0.898822	A	G
rs7199749	NKX2-5	0.00056	0.00192	increase	0.887431	G	A
rs12660959	NKX2-5	0.00105	0.00278	increase	0.869998	T	A
rs1997782	NKX2-5	0.00081	0.00232	increase	0.860856	C	A
rs28607927	NKX2-5	0.00141	0.00339	increase	0.854465	T	C
rs10756294	NKX2-5	0.00225	0.00484	increase	0.837684	A	G
rs73242623	NKX2-5	0.0011	0.00277	increase	0.832113	C	T
rs76156742	NKX2-5	0.00202	0.0044	increase	0.830028	A	G
rs10019912	NKX2-5	0.00156	0.00357	increase	0.8262	C	T
rs58561832	NKX2-5	0.00219	0.00465	increase	0.81685	T	A
rs1421666	NKX2-5	0.00127	0.00302	increase	0.813525	A	G
rs77931854	NKX2-5	0.00213	0.00451	increase	0.80796	C	T
rs9529895	NKX2-5	0.00212	0.00077	decrease	-0.803857	C	T
rs3132574	NKX2-5	0.00371	0.00165	decrease	-0.820268	C	A
rs10239543	NKX2-5	0.00182	0.00056	decrease	-0.837853	T	C
rs4599481	NKX2-5	0.00441	0.00199	decrease	-0.84689	T	G
rs1539311	NKX2-5	0.00223	0.00074	decrease	-0.877329	C	T
rs1264300	NKX2-5	0.00227	0.00073	decrease	-0.902995	A	G
rs6841723	NKX2-5	0.00372	0.00148	decrease	-0.917476	G	A
rs10059643	NKX2-5	0.00316	0.00118	decrease	-0.91976	G	A
rs827859	NKX2-5	0.00275	0.00094	decrease	-0.936618	T	G
rs10960497	NKX2-5	0.00377	0.00145	decrease	-0.949827	C	T
rs2406123	NKX2-5	0.00484	0.00199	decrease	-0.956446	A	C
rs57527611	NKX2-5	0.00423	0.00163	decrease	-0.980902	C	G
rs12658451	NKX2-5	0.00499	0.00197	decrease	-1.00234	T	C
rs1040534	NKX2-5	0.0051	0.00191	decrease	-1.05747	T	A
rs72983433	NKX2-5	0.01176	0.00485	decrease	-1.11977	A	G
rs12658007	NKX2-5	0.00492	0.00139	decrease	-1.29428	A	G
rs6699171	NKX2-5	0.00458	0.00124	decrease	-1.30145	A	T
rs2465147	NKX2-5	0.00786	0.00252	decrease	-1.32187	T	C
rs1352836	NKX2-5	0.00497	0.00124	decrease	-1.39824	T	C
rs57373979	NKX2-5	0.0049	0.00112	decrease	-1.45933	T	C
rs256995	NKX2-5	0.00549	0.00088	decrease	-1.76586	G	A
rs13360205	NKX2-5	0.00426	0.00045	decrease	-1.83052	A	G
rs2218171	NKX2-5	0.00537	0.0005	decrease	-2.05723	T	C

## Sheet: NKX2-5 Ki values
SNP_Allele	Binding_Constant	FC_log2	Allele_Type
rs4863698_G	0.00186	1	Ref
rs6758103_G	0.00139	1	Ref
rs7350789_G	0.00113	1	Ref
rs4918896_G	0.00059	1	Ref
rs4738588_G	0.00084	1	Ref
rs839151_C	0.00156	1	Ref
rs60403054_T	0.00112	1	Ref
rs2137643_T	0.00172	1	Ref
rs28394479_C	0.001	1	Ref
rs4417999_G	0.00135	1	Ref
rs7303642_C	0.00076	1	Ref
rs2353240_A	0.00154	1	Ref
rs72775239_C	0.00122	1	Ref
rs7587235_T	0.00113	1	Ref
rs2174080_C	0.00076	1	Ref
rs13386758_C	0.00087	1	Ref
rs71402285_G	0.00114	1	Ref
rs3131029_A	0.00103	1	Ref
rs9543736_T	0.00162	1	Ref
rs7826185_A	0.00125	1	Ref
rs7199749_G	0.00056	1	Ref
rs12660959_T	0.00105	1	Ref
rs1997782_C	0.00081	1	Ref
rs28607927_T	0.00141	1	Ref
rs10756294_A	0.00225	1	Ref
rs73242623_C	0.0011	1	Ref
rs76156742_A	0.00202	1	Ref
rs10019912_C	0.00156	1	Ref
rs58561832_T	0.00219	1	Ref
rs1421666_A	0.00127	1	Ref
rs77931854_C	0.00213	1	Ref
rs13136545_C	0.00095	1	Ref
rs150644979_C	0.00203	1	Ref
rs348128_T	0.00157	1	Ref
rs12509972_C	0.00174	1	Ref
rs74570836_T	0.00189	1	Ref
rs11012461_G	0.00116	1	Ref
rs12348119_C	0.00117	1	Ref
rs3892630_C	0.00279	1	Ref
rs705930_T	0.00059	1	Ref
rs11733759_C	0.00142	1	Ref
rs138604319_A	0.00311	1	Ref
rs6542633_C	0.00173	1	Ref
rs17389232_C	0.00114	1	Ref
rs166391_G	0.00145	1	Ref
rs12103403_C	0.00105	1	Ref
rs56409046_C	0.00091	1	Ref
rs60747519_G	0.00115	1	Ref
rs11012456_C	0.00198	1	Ref
rs1948881_C	0.00117	1	Ref
rs10140383_G	0.00106	1	Ref
rs4561950_G	0.00103	1	Ref
rs1514658_A	0.00123	1	Ref
rs7669759_C	0.00072	1	Ref
rs10173724_C	0.00201	1	Ref
rs12888666_C	0.00436	1	Ref
rs28750730_A	0.00097	1	Ref
rs182772996_A	0.00069	1	Ref
rs3095354_T	0.00197	1	Ref
rs6455581_G	0.00123	1	Ref
rs2471561_A	0.00207	1	Ref
rs10488555_T	0.00298	1	Ref
rs149553113_C	0.00254	1	Ref
rs10100750_C	0.00071	1	Ref
rs4441969_G	0.0009	1	Ref
rs76141826_G	0.00081	1	Ref
rs73827460_C	0.00155	1	Ref
rs56138517_A	0.00289	1	Ref
rs56917209_C	0.0007	1	Ref
rs2406124_A	0.00097	1	Ref
rs28733207_C	0.00149	1	Ref
rs10751804_G	0.00084	1	Ref
rs7602672_A	0.00139	1	Ref
rs10064210_G	0.00149	1	Ref
rs1949370_C	0.00143	1	Ref
rs56755272_C	0.00072	1	Ref
rs2896074_G	0.00945	1	Ref
rs28880679_C	0.0017	1	Ref
rs4501834_G	0.00075	1	Ref
rs17660975_C	0.0016	1	Ref
rs17389505_A	0.00141	1	Ref
rs11012467_G	0.00136	1	Ref
rs9694545_G	0.0008	1	Ref
rs79191642_C	0.00088	1	Ref
rs11755054_A	0.00457	1	Ref
rs7992487_T	0.00182	1	Ref
rs1832872_G	0.00085	1	Ref
rs28720993_G	0.00157	1	Ref
rs72472137_G	0.00182	1	Ref
rs9364954_G	0.0012	1	Ref
rs34785398_G	0.00273	1	Ref
rs117793142_G	0.00139	1	Ref
rs12410154_G	0.00068	1	Ref
rs7956812_G	0.00045	1	Ref
rs62108790_T	0.00091	1	Ref
rs6838630_A	0.00054	1	Ref
rs35044293_C	0.00139	1	Ref
rs11240298_G	0.00158	1	Ref
rs11573113_G	0.00332	1	Ref
rs12642898_G	0.00119	1	Ref
rs3913817_C	0.00093	1	Ref
rs73235923_C	0.00113	1	Ref
rs67000357_G	0.00067	1	Ref
rs7550921_A	0.00126	1	Ref
rs34242559_T	0.00055	1	Ref
rs844434_G	0.0011	1	Ref
rs839163_T	0.00119	1	Ref
rs1052414_G	0.00174	1	Ref
rs1363099_C	0.00205	1	Ref
rs113015898_C	0.00089	1	Ref
rs2535331_G	0.00135	1	Ref
rs385040_T	0.00135	1	Ref
rs10930712_G	0.00054	1	Ref
rs34444956_C	0.00095	1	Ref
rs4899932_G	0.00215	1	Ref
rs6470963_C	0.00219	1	Ref
rs10809617_T	0.00067	1	Ref
rs112463474_G	0.0053	1	Ref
rs59794438_C	0.00093	1	Ref
rs56314493_T	0.0011	1	Ref
rs839172_A	0.00416	1	Ref
rs80333144_G	0.00054	1	Ref
rs7673642_C	0.00129	1	Ref
rs60375467_C	0.00193	1	Ref
rs9292865_C	0.00109	1	Ref
rs57461213_G	0.00113	1	Ref
rs77379234_C	0.00137	1	Ref
rs28758520_A	0.00178	1	Ref
rs11596551_G	0.00161	1	Ref
rs2395486_C	0.00068	1	Ref
rs13400849_C	0.00241	1	Ref
rs11734428_C	0.00062	1	Ref
rs552525_C	0.00102	1	Ref
rs6455573_G	0.001	1	Ref
rs4859881_A	0.00113	1	Ref
rs9994802_C	0.00183	1	Ref
rs7636814_G	0.00121	1	Ref
rs209808_G	0.00139	1	Ref
rs34700098_C	0.00062	1	Ref
rs11210573_G	0.00588	1	Ref
rs7973773_A	0.00157	1	Ref
rs11012446_A	0.00103	1	Ref
rs17389938_G	0.00072	1	Ref
rs7329608_A	0.00076	1	Ref
rs77055691_T	0.00112	1	Ref
rs28609375_C	0.0007	1	Ref
rs75667270_T	0.00098	1	Ref
rs6821826_A	0.00171	1	Ref
rs59548855_C	0.00089	1	Ref
rs2174079_C	0.00174	1	Ref
rs2332403_T	0.00101	1	Ref
rs10193134_T	0.00127	1	Ref
rs1371475_A	0.00165	1	Ref
rs2175971_G	0.00129	1	Ref
rs12659965_G	0.00054	1	Ref
rs1409096_T	0.00084	1	Ref
rs56003703_C	0.00089	1	Ref
rs60487483_C	0.00055	1	Ref
rs12943640_G	0.00133	1	Ref
rs1439828_G	0.00082	1	Ref
rs6991807_C	0.00187	1	Ref
rs75155142_C	0.00109	1	Ref
rs35968388_C	0.00378	1	Ref
rs2252856_G	0.00214	1	Ref
rs16984782_C	0.00154	1	Ref
rs13384087_C	0.00102	1	Ref
rs7669118_G	0.00134	1	Ref
rs55881014_G	0.00142	1	Ref
rs3931299_C	0.0004	1	Ref
rs860813_T	0.00149	1	Ref
rs57756309_T	0.00199	1	Ref
rs4610176_G	0.0023	1	Ref
rs6538032_G	0.00076	1	Ref
rs200123578_T	0.00092	1	Ref
rs4951143_G	0.00107	1	Ref
rs1421668_C	0.00093	1	Ref
rs13435039_G	0.00246	1	Ref
rs729265_G	0.00094	1	Ref
rs79569625_C	0.00203	1	Ref
rs75628321_C	0.00279	1	Ref
rs117312134_C	0.00066	1	Ref
rs12187898_C	0.00107	1	Ref
rs10501386_G	0.00109	1	Ref
rs4372475_G	0.00172	1	Ref
rs4661318_T	0.00068	1	Ref
rs4320234_T	0.00262	1	Ref
rs719403_G	0.00079	1	Ref
rs7814333_T	0.00168	1	Ref
rs11012433_G	0.00278	1	Ref
rs2105333_T	0.00076	1	Ref
rs2844652_C	0.00076	1	Ref
rs10516580_A	0.00152	1	Ref
rs16922088_C	0.00072	1	Ref
rs11012464_A	0.00126	1	Ref
rs2689427_C	0.00239	1	Ref
rs6919023_T	0.00079	1	Ref
rs12898796_T	0.00182	1	Ref
rs262832_A	0.00134	1	Ref
rs79395759_G	0.00211	1	Ref
rs149797396_C	0.00072	1	Ref
rs28739524_C	0.00144	1	Ref
rs6951180_G	0.0015	1	Ref
rs66691901_G	0.00344	1	Ref
rs10046033_A	0.00051	1	Ref
rs36157464_G	0.00102	1	Ref
rs1017556_G	0.00236	1	Ref
rs28366136_C	0.00086	1	Ref
rs6553853_C	0.00099	1	Ref
rs76376228_C	0.00128	1	Ref
rs3899774_C	0.00288	1	Ref
rs9501387_C	0.0017	1	Ref
rs13106889_T	0.00109	1	Ref
rs17388957_T	0.00191	1	Ref
rs141493176_G	0.00151	1	Ref
rs2844658_G	0.0007	1	Ref
rs12146332_C	0.00059	1	Ref
rs3132578_A	0.00083	1	Ref
rs16922105_C	0.00165	1	Ref
rs180717612_G	0.00183	1	Ref
rs10059898_G	0.00178	1	Ref
rs6689536_T	0.00091	1	Ref
rs7578973_G	0.00139	1	Ref
rs2853970_G	0.00147	1	Ref
rs67345347_G	0.00316	1	Ref
rs9826403_A	0.00088	1	Ref
rs3845574_C	0.00095	1	Ref
rs10792230_C	0.00115	1	Ref
rs1959131_T	0.00104	1	Ref
rs534512636_C	0.00143	1	Ref
rs35769936_A	0.00088	1	Ref
rs61472102_T	0.00107	1	Ref
rs79277052_T	0.00127	1	Ref
rs11012419_C	0.00121	1	Ref
rs1264334_G	0.00147	1	Ref
rs7566184_G	0.00186	1	Ref
rs9262290_G	0.00054	1	Ref
rs1891352_C	0.00073	1	Ref
rs2866688_G	0.00111	1	Ref
rs6845499_G	0.00064	1	Ref
rs67722488_A	0.00187	1	Ref
rs56900310_T	0.00143	1	Ref
rs4904411_C	0.00144	1	Ref
rs35670506_G	0.00092	1	Ref
rs6822945_T	0.00093	1	Ref
rs6910869_A	0.00153	1	Ref
rs6980863_G	0.00061	1	Ref
rs2532937_G	0.00156	1	Ref
rs62108782_G	0.00136	1	Ref
rs10197165_C	0.00091	1	Ref
rs28506478_C	0.00091	1	Ref
rs7849702_G	0.00186	1	Ref
rs975136_T	0.00166	1	Ref
rs309906_G	0.00139	1	Ref
rs827998_C	0.00052	1	Ref
rs72795018_C	0.00419	1	Ref
rs1264331_G	0.00059	1	Ref
rs75705964_C	0.00093	1	Ref
rs4904124_A	0.00094	1	Ref
rs6441249_A	0.00135	1	Ref
rs9677482_G	0.00183	1	Ref
rs9572745_G	0.00108	1	Ref
rs6554404_A	0.00197	1	Ref
rs827865_A	0.00158	1	Ref
rs73242622_C	0.00069	1	Ref
rs2108812_C	0.00292	1	Ref
rs1264305_C	0.00063	1	Ref
rs614406_G	0.00112	1	Ref
rs34829893_G	0.00141	1	Ref
rs9361153_G	0.00127	1	Ref
rs10079000_C	0.00269	1	Ref
rs9592792_A	0.00072	1	Ref
rs12405381_C	0.00171	1	Ref
rs62260802_G	0.00073	1	Ref
rs6892071_G	0.00088	1	Ref
rs6808992_A	0.00153	1	Ref
rs12042133_C	0.00125	1	Ref
rs7439347_G	0.0009	1	Ref
rs6742017_G	0.00127	1	Ref
rs10035851_C	0.00085	1	Ref
rs601019_T	0.0018	1	Ref
rs28600753_A	0.00151	1	Ref
rs138741144_G	0.00254	1	Ref
rs2035231_G	0.00174	1	Ref
rs4665218_G	0.00372	1	Ref
rs56924116_G	0.00117	1	Ref
rs8011324_G	0.00235	1	Ref
rs839155_C	0.0011	1	Ref
rs348139_C	0.00156	1	Ref
rs34700358_C	0.00052	1	Ref
rs1147610_G	0.00082	1	Ref
rs10170886_G	0.00142	1	Ref
rs13011467_G	0.00075	1	Ref
rs56100674_A	0.00262	1	Ref
rs72869573_C	0.00772	1	Ref
rs3132575_G	0.0087	1	Ref
rs10900428_T	0.00106	1	Ref
rs13075790_C	0.00099	1	Ref
rs300356_T	0.00182	1	Ref
rs4661575_C	0.00107	1	Ref
rs4859515_T	0.00282	1	Ref
rs2844521_C	0.00055	1	Ref
rs9343499_C	0.00078	1	Ref
rs73311328_T	0.00139	1	Ref
rs863392_G	0.00124	1	Ref
rs7719885_A	0.00513	1	Ref
rs76761018_G	0.00056	1	Ref
rs17136841_A	0.00079	1	Ref
rs10776955_C	0.00148	1	Ref
rs73912712_A	0.00103	1	Ref
rs72613817_G	0.00042	1	Ref
rs143898047_G	0.00073	1	Ref
rs55771104_T	0.00136	1	Ref
rs35822653_C	0.00106	1	Ref
rs1176869_C	0.00083	1	Ref
rs11012447_A	0.00122	1	Ref
rs2471562_A	0.00161	1	Ref
rs4339621_T	0.00099	1	Ref
rs17487074_C	0.0006	1	Ref
rs12591598_C	0.00178	1	Ref
rs2886564_G	0.00053	1	Ref
rs57472807_T	0.00132	1	Ref
rs580438_C	0.00134	1	Ref
rs11596712_A	0.00272	1	Ref
rs2166186_G	0.00096	1	Ref
rs28454512_C	0.00096	1	Ref
rs7698246_G	0.00088	1	Ref
rs58569619_G	0.00209	1	Ref
rs13415315_G	0.00137	1	Ref
rs146613330_C	0.00097	1	Ref
rs1113677_T	0.00082	1	Ref
rs626655_G	0.00074	1	Ref
rs10133981_G	0.0005	1	Ref
rs62108840_A	0.00214	1	Ref
rs13145902_C	0.00084	1	Ref
rs7762096_C	0.0006	1	Ref
rs10828167_G	0.00093	1	Ref
rs10803349_T	0.00144	1	Ref
rs17044108_G	0.00136	1	Ref
rs6985947_C	0.00103	1	Ref
rs72472134_C	0.00103	1	Ref
rs262814_A	0.00195	1	Ref
rs61957777_G	0.00112	1	Ref
rs6799217_G	0.00079	1	Ref
rs2088996_A	0.00189	1	Ref
rs6846322_G	0.00072	1	Ref
rs10455065_T	0.00089	1	Ref
rs9679542_T	0.00106	1	Ref
rs199995631_T	0.00074	1	Ref
rs12102728_C	0.00269	1	Ref
rs1832678_C	0.00091	1	Ref
rs1029580_A	0.00117	1	Ref
rs13403742_A	0.00163	1	Ref
rs2438352_A	0.0013	1	Ref
rs12193434_T	0.00149	1	Ref
rs28376086_C	0.00088	1	Ref
rs16943788_T	0.00106	1	Ref
rs187805_C	0.00089	1	Ref
rs144707825_C	0.0009	1	Ref
rs828004_G	0.00099	1	Ref
rs4551458_C	0.00153	1	Ref
rs2432096_T	0.00047	1	Ref
rs1264303_A	0.00136	1	Ref
rs1264345_G	0.00065	1	Ref
rs1363104_C	0.00074	1	Ref
rs9456284_G	0.00074	1	Ref
rs6542624_G	0.00164	1	Ref
rs56383312_G	0.00173	1	Ref
rs262822_C	0.00048	1	Ref
rs7541623_A	0.00048	1	Ref
rs72795059_T	0.00084	1	Ref
rs2406121_G	0.00093	1	Ref
rs72775250_G	0.00111	1	Ref
rs10253830_G	0.00129	1	Ref
rs7623291_C	0.00094	1	Ref
rs2106734_A	0.00085	1	Ref
rs6754512_A	0.00067	1	Ref
rs4598356_A	0.00194	1	Ref
rs72795036_C	0.00131	1	Ref
rs1038698_C	0.00232	1	Ref
rs28583467_G	0.00189	1	Ref
rs6827822_T	0.00475	1	Ref
rs1371477_C	0.00227	1	Ref
rs950264_T	0.00209	1	Ref
rs6878790_C	0.00136	1	Ref
rs10809623_G	0.00082	1	Ref
rs2844662_C	0.0011	1	Ref
rs6802120_C	0.0011	1	Ref
rs10060837_C	0.00445	1	Ref
rs13140165_T	0.00194	1	Ref
rs56320556_G	0.00157	1	Ref
rs1698787_T	0.00176	1	Ref
rs13404058_A	0.00168	1	Ref
rs80145646_C	0.00103	1	Ref
rs746566_C	0.00142	1	Ref
rs149976351_C	0.00067	1	Ref
rs10736422_C	0.00058	1	Ref
rs4738591_A	0.00935	1	Ref
rs139001454_C	0.00306	1	Ref
rs2165257_A	0.00106	1	Ref
rs9827048_C	0.00154	1	Ref
rs1451962_A	0.00116	1	Ref
rs59201809_G	0.00174	1	Ref
rs1264299_C	0.00059	1	Ref
rs2532927_A	0.00088	1	Ref
rs4534036_C	0.00396	1	Ref
rs6895961_C	0.00127	1	Ref
rs74536681_G	0.0005	1	Ref
rs113948160_G	0.00108	1	Ref
rs57269598_C	0.0007	1	Ref
rs35216534_C	0.00119	1	Ref
rs10051990_T	0.00197	1	Ref
rs10052804_A	0.00168	1	Ref
rs57014213_A	0.0013	1	Ref
rs7673980_C	0.00228	1	Ref
rs11596994_G	0.00151	1	Ref
rs58218398_G	0.00102	1	Ref
rs7756286_C	0.00181	1	Ref
rs12658276_A	0.00142	1	Ref
rs2320536_C	0.0028	1	Ref
rs7675586_G	0.00093	1	Ref
rs13135422_G	0.00034	1	Ref
rs6455572_A	0.00123	1	Ref
rs10175615_G	0.00194	1	Ref
rs7465601_A	0.00105	1	Ref
rs1317835_A	0.00106	1	Ref
rs1957713_C	0.00076	1	Ref
rs2465144_G	0.00076	1	Ref
rs1983874_G	0.00617	1	Ref
rs736557_A	0.00087	1	Ref
rs1833515_G	0.00189	1	Ref
rs1493421_C	0.0026	1	Ref
rs7893606_T	0.00058	1	Ref
rs16872933_C	0.00119	1	Ref
rs749555_C	0.00109	1	Ref
rs3130650_G	0.00171	1	Ref
rs9994784_C	0.00222	1	Ref
rs6837593_A	0.00059	1	Ref
rs78310696_G	0.00121	1	Ref
rs75232254_C	0.00101	1	Ref
rs3130653_C	0.0006	1	Ref
rs11737353_G	0.00143	1	Ref
rs10479296_G	0.00278	1	Ref
rs35869887_G	0.00082	1	Ref
rs827860_C	0.00186	1	Ref
rs6916144_T	0.00342	1	Ref
rs10776953_G	0.00062	1	Ref
rs1839219_T	0.00094	1	Ref
rs1502875_G	0.00105	1	Ref
rs10193850_C	0.00053	1	Ref
rs60859843_G	0.00096	1	Ref
rs844432_C	0.00054	1	Ref
rs2844526_T	0.00033	1	Ref
rs34341630_C	0.00065	1	Ref
rs1410164_C	0.00118	1	Ref
rs17278757_C	0.00097	1	Ref
rs11941013_T	0.00087	1	Ref
rs12047348_G	0.00152	1	Ref
rs6451656_C	0.0012	1	Ref
rs2406118_C	0.0011	1	Ref
rs7801223_C	0.00132	1	Ref
rs12113054_T	0.00208	1	Ref
rs3828713_C	0.00103	1	Ref
rs6575379_C	0.00321	1	Ref
rs36116693_T	0.00094	1	Ref
rs6857479_G	0.00094	1	Ref
rs117547718_C	0.00304	1	Ref
rs9349041_G	0.00227	1	Ref
rs844436_A	0.0015	1	Ref
rs28697180_C	0.00106	1	Ref
rs57417127_A	0.00095	1	Ref
rs16892115_C	0.00073	1	Ref
rs60540762_C	0.00472	1	Ref
rs1154136_C	0.00163	1	Ref
rs368857355_C	0.00041	1	Ref
rs62329957_T	0.00097	1	Ref
rs72795052_C	0.00097	1	Ref
rs7898090_G	0.00086	1	Ref
rs10169305_G	0.00131	1	Ref
rs28841337_G	0.00155	1	Ref
rs2240804_G	0.00077	1	Ref
rs6455563_G	0.00134	1	Ref
rs116504242_C	0.00079	1	Ref
rs9940186_A	0.00079	1	Ref
rs2403284_C	0.00148	1	Ref
rs13177365_G	0.00114	1	Ref
rs1832677_C	0.00126	1	Ref
rs2391936_C	0.00126	1	Ref
rs59779536_C	0.0008	1	Ref
rs13221828_C	0.00081	1	Ref
rs6470959_T	0.00116	1	Ref
rs36054569_A	0.00093	1	Ref
rs11730329_C	0.00059	1	Ref
rs10858408_G	0.00141	1	Ref
rs9307375_C	0.00141	1	Ref
rs66727311_A	0.00118	1	Ref
rs57221952_C	0.00352	1	Ref
rs7515102_C	0.00282	1	Ref
rs13435138_C	0.0013	1	Ref
rs9364952_G	0.00095	1	Ref
rs1624108_A	0.00119	1	Ref
rs256965_G	0.00037	1	Ref
rs79018653_C	0.00073	1	Ref
rs6867959_T	0.00156	1	Ref
rs11990740_G	0.00097	1	Ref
rs13129350_G	0.00109	1	Ref
rs7659122_G	0.00109	1	Ref
rs73681704_C	0.0011	1	Ref
rs62108792_G	0.00435	1	Ref
rs1941023_G	0.00136	1	Ref
rs2388745_T	0.00077	1	Ref
rs74461473_C	0.00077	1	Ref
rs9643366_T	0.0015	1	Ref
rs16851281_C	0.00138	1	Ref
rs4295362_C	0.00054	1	Ref
rs6470958_G	0.00054	1	Ref
rs35220472_T	0.00371	1	Ref
rs75169626_G	0.00128	1	Ref
rs6824774_T	0.0058	1	Ref
rs34970193_C	0.00116	1	Ref
rs11593423_C	0.00055	1	Ref
rs9848338_G	0.00043	1	Ref
rs2057017_A	0.00068	1	Ref
rs238675_G	0.00302	1	Ref
rs10038493_G	0.00056	1	Ref
rs733317_A	0.00056	1	Ref
rs16872880_C	0.00093	1	Ref
rs58054752_C	0.00044	1	Ref
rs114513553_G	0.00106	1	Ref
rs13111829_T	0.00243	1	Ref
rs6811802_G	0.00082	1	Ref
rs4993300_C	0.00256	1	Ref
rs1264301_G	0.00045	1	Ref
rs2676727_A	0.0007	1	Ref
rs2523459_T	0.00084	1	Ref
rs11900941_C	0.00047	1	Ref
rs3131031_G	0.00047	1	Ref
rs113862218_T	0.00111	1	Ref
rs7837961_G	0.00111	1	Ref
rs1948880_G	0.00149	1	Ref
rs144393450_C	0.00048	1	Ref
rs6893854_A	0.00251	1	Ref
rs112329502_G	0.00074	1	Ref
rs12920477_C	0.00074	1	Ref
rs169716_G	0.00126	1	Ref
rs9347224_A	0.00408	1	Ref
rs11012469_G	0.00152	1	Ref
rs80311203_G	0.0014	1	Ref
rs828003_C	0.00115	1	Ref
rs1327727_C	0.00064	1	Ref
rs2043003_A	0.0009	1	Ref
rs75103509_G	0.00129	1	Ref
rs827853_T	0.00182	1	Ref
rs1923665_A	0.00078	1	Ref
rs4140396_C	0.00092	1	Ref
rs13096467_G	0.00132	1	Ref
rs7463033_G	0.00132	1	Ref
rs1264344_C	0.00172	1	Ref
rs10795652_T	0.00067	1	Ref
rs17044137_T	0.00067	1	Ref
rs4660210_C	0.00067	1	Ref
rs3913815_A	0.00383	1	Ref
rs72795054_G	0.00054	1	Ref
rs4852086_C	0.00041	1	Ref
rs16872890_C	0.00134	1	Ref
rs80202753_C	0.00439	1	Ref
rs4299850_G	0.00268	1	Ref
rs9364955_T	0.00441	1	Ref
rs145554819_G	0.00122	1	Ref
rs2844702_G	0.00109	1	Ref
rs62108777_C	0.00109	1	Ref
rs7857236_G	0.0011	1	Ref
rs10749159_G	0.0007	1	Ref
rs6114527_G	0.00124	1	Ref
rs6451666_C	0.00124	1	Ref
rs9543734_G	0.00112	1	Ref
rs1477784_A	0.00059	1	Ref
rs4904417_A	0.00059	1	Ref
rs56690481_G	0.00059	1	Ref
rs3129993_T	0.00114	1	Ref
rs1754405_A	0.00142	1	Ref
rs113548876_G	0.00033	1	Ref
rs28609175_C	0.00088	1	Ref
rs4334094_T	0.00143	1	Ref
rs73365837_T	0.00198	1	Ref
rs9355646_G	0.00102	1	Ref
rs13387442_C	0.00653	1	Ref
rs2102190_G	0.00089	1	Ref
rs7145360_G	0.00103	1	Ref
rs11593437_A	0.00657	1	Ref
rs2394451_T	0.00118	1	Ref
rs1264320_C	0.00063	1	Ref
rs3759602_T	0.00063	1	Ref
rs200913095_T	0.00091	1	Ref
rs78108816_C	0.003	1	Ref
rs2428485_C	0.00119	1	Ref
rs78052642_G	0.00162	1	Ref
rs757179_G	0.00036	1	Ref
rs9343517_G	0.00205	1	Ref
rs2523475_A	0.00149	1	Ref
rs72652975_C	0.00079	1	Ref
rs11902033_G	0.00065	1	Ref
rs1553559_T	0.00178	1	Ref
rs9262291_T	0.00052	1	Ref
rs1217753_C	0.00109	1	Ref
rs73042336_C	0.00152	1	Ref
rs1022286_G	0.00124	1	Ref
rs41308639_A	0.00111	1	Ref
rs10275619_T	0.00083	1	Ref
rs1363102_G	0.00184	1	Ref
rs8092183_C	0.0017	1	Ref
rs2032792_G	0.00401	1	Ref
rs13088547_C	0.00098	1	Ref
rs17368602_C	0.00084	1	Ref
rs72775238_A	0.00084	1	Ref
rs150633728_G	0.0007	1	Ref
rs7320083_G	0.00085	1	Ref
rs2532938_G	0.00056	1	Ref
rs76616305_G	0.00071	1	Ref
rs1476700_G	0.00086	1	Ref
rs2245387_C	0.00116	1	Ref
rs10071791_T	0.00072	1	Ref
rs28656265_C	0.00161	1	Ref
rs17481499_C	0.00117	1	Ref
rs6455576_C	0.00162	1	Ref
rs6470956_C	0.00044	1	Ref
rs57556536_G	0.00133	1	Ref
rs11624919_T	0.00134	1	Ref
rs191065931_A	0.00134	1	Ref
rs2517457_C	0.0006	1	Ref
rs75862770_G	0.0006	1	Ref
rs56962140_T	0.0021	1	Ref
rs12331312_T	0.00061	1	Ref
rs34564985_C	0.00061	1	Ref
rs200320094_A	0.00122	1	Ref
rs9530360_G	0.00062	1	Ref
rs4899939_G	0.00047	1	Ref
rs16922090_A	0.00078	1	Ref
rs13215471_T	0.00731	1	Ref
rs13129897_A	0.00063	1	Ref
rs113991468_G	0.00048	1	Ref
rs6442368_C	0.00186	1	Ref
rs112069784_G	0.00171	1	Ref
rs3130657_T	0.00126	1	Ref
rs1547816_T	0.0008	1	Ref
rs9323037_T	0.00157	1	Ref
rs28482195_A	0.00096	1	Ref
rs4660587_G	0.00096	1	Ref
rs7338740_C	0.00081	1	Ref
rs7019645_C	0.00098	1	Ref
rs12920484_C	0.00067	1	Ref
rs6461997_T	0.00145	1	Ref
rs17044092_T	0.0013	1	Ref
rs7573385_C	0.00052	1	Ref
rs10041776_C	0.00084	1	Ref
rs10738253_C	0.00164	1	Ref
rs12894714_G	0.00038	1	Ref
rs1961950_C	0.00038	1	Ref
rs6930445_G	0.00117	1	Ref
rs4410552_G	0.00212	1	Ref
rs34672069_G	0.00054	1	Ref
rs9343507_C	0.00102	1	Ref
rs10960270_A	0.00245	1	Ref
rs150310611_G	0.0015	1	Ref
rs143257133_C	0.00039	1	Ref
rs1349124_A	0.00103	1	Ref
rs7735821_A	0.00104	1	Ref
rs73235921_T	0.00088	1	Ref
rs73827437_C	0.00072	1	Ref
rs13102150_C	0.00137	1	Ref
rs6562839_G	0.00057	1	Ref
rs569967_G	0.00122	1	Ref
rs16872892_T	0.00075	1	Ref
rs12674799_T	0.00142	1	Ref
rs34972408_C	0.00093	1	Ref
rs17279331_G	0.00044	1	Ref
rs7993357_C	0.00094	1	Ref
rs55788414_C	0.00046	1	Ref
rs6760035_G	0.00046	1	Ref
rs10216955_G	0.00063	1	Ref
rs72981931_C	0.00063	1	Ref
rs6470954_C	0.0013	1	Ref
rs66521413_T	0.00264	1	Ref
rs6709962_G	0.00131	1	Ref
rs7671941_C	0.00064	1	Ref
rs75772292_C	0.00098	1	Ref
rs11942607_G	0.00149	1	Ref
rs7305998_T	0.00065	1	Ref
rs79314082_C	0.00134	1	Ref
rs17002829_C	0.00169	1	Ref
rs9364956_A	0.00101	1	Ref
rs1217752_A	0.00084	1	Ref
rs16952387_G	0.00084	1	Ref
rs2548370_A	0.00067	1	Ref
rs1005633_C	0.00204	1	Ref
rs11103915_T	0.00119	1	Ref
rs13080892_T	0.00188	1	Ref
rs13427718_T	0.00429	1	Ref
rs28623255_G	0.00103	1	Ref
rs72652991_G	0.00069	1	Ref
rs17165604_G	0.0026	1	Ref
rs28366125_C	0.00122	1	Ref
rs209799_A	0.0007	1	Ref
rs10151544_T	0.00088	1	Ref
rs1502874_A	0.00193	1	Ref
rs28398301_C	0.00141	1	Ref
rs11240304_C	0.00071	1	Ref
rs7795310_G	0.0016	1	Ref
rs11250642_T	0.00125	1	Ref
rs7781885_C	0.0009	1	Ref
rs11592569_C	0.00055	1	Ref
rs72652998_G	0.00091	1	Ref
rs10936976_T	0.00162	1	Ref
rs138466776_C	0.00038	1	Ref
rs2276896_C	0.00038	1	Ref
rs9667666_G	0.00127	1	Ref
rs28545156_C	0.00056	1	Ref
rs62439867_C	0.00056	1	Ref
rs62108785_G	0.00145	1	Ref
rs2517468_G	0.0011	1	Ref
rs10467409_A	0.00128	1	Ref
rs7683979_G	0.00325	1	Ref
rs7546128_C	0.00075	1	Ref
rs149161040_G	0.00111	1	Ref
rs2564010_G	0.00148	1	Ref
rs4740399_A	0.00112	1	Ref
rs28421913_G	0.00076	1	Ref
rs111248746_G	0.00058	1	Ref
rs12505591_G	0.00131	1	Ref
rs6843415_C	0.00131	1	Ref
rs10139926_G	0.00095	1	Ref
rs12050084_C	0.00077	1	Ref
rs12892744_C	0.00077	1	Ref
rs2517577_C	0.00059	1	Ref
rs6470961_G	0.00168	1	Ref
rs2242151_C	0.00078	1	Ref
rs2153808_T	0.00479	1	Ref
rs1264311_G	0.0006	1	Ref
rs2243739_T	0.0006	1	Ref
rs12335806_A	0.00262	1	Ref
rs2406126_C	0.00079	1	Ref
rs6553857_C	0.00079	1	Ref
rs2596538_G	0.00098	1	Ref
rs3095349_A	0.00209	1	Ref
rs72652980_C	0.00155	1	Ref
rs1264315_C	0.00044	1	Ref
rs17290188_G	0.00137	1	Ref
rs6455578_A	0.00063	1	Ref
rs75659209_T	0.00138	1	Ref
rs17002828_G	0.00101	1	Ref
rs13408052_G	0.00102	1	Ref
rs79010858_C	0.00102	1	Ref
rs9311054_C	0.00065	1	Ref
rs6575382_T	0.00084	1	Ref
rs11159839_A	0.00141	1	Ref
rs6597672_C	0.00141	1	Ref
rs11994487_T	0.00047	1	Ref
rs7922346_G	0.00047	1	Ref
rs17409828_G	0.00236	1	Ref
rs75532680_C	0.00066	1	Ref
rs55884872_C	0.00085	1	Ref
rs7156276_A	0.00085	1	Ref
rs78122893_C	0.00163	1	Ref
rs10756303_T	0.00106	1	Ref
rs2043004_G	0.00106	1	Ref
rs4900321_A	0.00087	1	Ref
rs7657658_C	0.00049	1	Ref
rs2271807_A	0.00164	1	Ref
rs35727941_G	0.00548	1	Ref
rs7671432_C	0.00088	1	Ref
rs1566969_T	0.00165	1	Ref
rs1754414_C	0.0005	1	Ref
rs10960277_T	0.00187	1	Ref
rs28485560_T	0.0009	1	Ref
rs72775247_C	0.0011	1	Ref
rs8059559_G	0.0015	1	Ref
rs13077258_G	0.00131	1	Ref
rs3095353_T	0.00092	1	Ref
rs17389728_C	0.00053	1	Ref
rs9327909_T	0.00191	1	Ref
rs10238108_T	0.00152	1	Ref
rs11598916_G	0.00113	1	Ref
rs59201365_C	0.00134	1	Ref
rs10873389_G	0.00075	1	Ref
rs4740213_C	0.00136	1	Ref
rs611372_G	0.00117	1	Ref
rs10479298_G	0.00077	1	Ref
rs7633380_G	0.00057	1	Ref
rs7870016_T	0.00299	1	Ref
rs112564482_G	0.00078	1	Ref
rs6461998_T	0.00139	1	Ref
rs10283652_G	0.00058	1	Ref
rs6980975_G	0.00058	1	Ref
rs28520821_C	0.00059	1	Ref
rs6695748_G	0.00059	1	Ref
rs6717844_C	0.00059	1	Ref
rs114598563_A	0.00406	1	Ref
rs4672841_T	0.00162	1	Ref
rs12147567_G	0.0006	1	Ref
rs2535326_C	0.0006	1	Ref
rs1562691_C	0.00081	1	Ref
rs7612649_C	0.00102	1	Ref
rs6919284_C	0.00164	1	Ref
rs11721383_C	0.00082	1	Ref
rs10455817_A	0.00041	1	Ref
rs146404595_G	0.00041	1	Ref
rs309908_G	0.00269	1	Ref
rs1598865_G	0.00707	1	Ref
rs9456293_A	0.00125	1	Ref
rs13061619_G	0.00167	1	Ref
rs115122924_G	0.00042	1	Ref
rs2042065_A	0.00042	1	Ref
rs16872108_A	0.00147	1	Ref
rs28719609_T	0.00127	1	Ref
rs17627161_G	0.00085	1	Ref
rs6817305_A	0.00043	1	Ref
rs112592594_C	0.00128	1	Ref
rs17019997_A	0.00213	1	Ref
rs12992981_T	0.00129	1	Ref
rs9395501_G	0.00066	1	Ref
rs146189703_T	0.00173	1	Ref
rs8098934_T	0.00195	1	Ref
rs11902930_G	0.00067	1	Ref
rs12646871_G	0.00067	1	Ref
rs117847346_C	0.00068	1	Ref
rs3130795_C	0.00068	1	Ref
rs5017515_C	0.00133	1	Ref
rs79482421_G	0.00133	1	Ref
rs7663359_C	0.00155	1	Ref
rs11107420_A	0.00112	1	Ref
rs1754407_G	0.00112	1	Ref
rs57317793_G	0.00177	1	Ref
rs112915369_T	0.00069	1	Ref
rs6997730_G	0.00069	1	Ref
rs583642_C	0.00048	1	Ref
rs36166667_C	0.00222	1	Ref
rs111792270_G	0.0007	1	Ref
rs72652984_C	0.0007	1	Ref
rs141167512_C	0.00114	1	Ref
rs2214412_G	0.0005	1	Ref
rs34065281_G	0.00051	1	Ref
rs57635268_T	0.00162	1	Ref
rs6952470_C	0.00141	1	Ref
rs11159838_G	0.00098	1	Ref
rs28612635_G	0.00143	1	Ref
rs117478716_G	0.00144	1	Ref
rs1572168_A	0.00099	1	Ref
rs10138748_C	0.00054	1	Ref
rs115300972_G	0.00054	1	Ref
rs192414812_G	0.001	1	Ref
rs73242620_A	0.001	1	Ref
rs13137003_C	0.00078	1	Ref
rs4905480_A	0.00124	1	Ref
rs9466431_G	0.00124	1	Ref
rs11196687_G	0.00056	1	Ref
rs1451961_T	0.00056	1	Ref
rs8033246_G	0.00056	1	Ref
rs7122295_G	0.00423	1	Ref
rs12357853_G	0.00194	1	Ref
rs6455564_C	0.00127	1	Ref
rs7706353_C	0.00081	1	Ref
rs9296224_G	0.00081	1	Ref
rs55837297_T	0.00313	1	Ref
rs13195962_G	0.00175	1	Ref
rs1953242_G	0.00059	1	Ref
rs2813387_T	0.00059	1	Ref
rs4842601_T	0.00084	1	Ref
rs10794764_C	0.00037	1	Ref
rs4370813_G	0.00037	1	Ref
rs8048115_T	0.00155	1	Ref
rs12353026_G	0.00108	1	Ref
rs56374955_T	0.00108	1	Ref
rs6854989_C	0.00108	1	Ref
rs13124454_G	0.00061	1	Ref
rs2251731_C	0.00085	1	Ref
rs2546484_C	0.00109	1	Ref
rs77816870_G	0.00038	1	Ref
rs6470953_G	0.00133	1	Ref
rs1176992_G	0.00228	1	Ref
rs3856258_T	0.00062	1	Ref
rs4388114_T	0.00371	1	Ref
rs7765579_G	0.00039	1	Ref
rs12102293_T	0.00063	1	Ref
rs2345833_G	0.00088	1	Ref
rs11994338_A	0.00185	1	Ref
rs262830_T	0.00137	1	Ref
rs624159_C	0.00113	1	Ref
rs57191304_G	0.00258	1	Ref
rs9346746_C	0.00138	1	Ref
rs3001783_G	0.00114	1	Ref
rs74472408_C	0.00114	1	Ref
rs2317971_A	0.0009	1	Ref
rs185716590_A	0.00163	1	Ref
rs997944_G	0.00116	1	Ref
rs2088993_A	0.00141	1	Ref
rs112371853_G	0.00068	1	Ref
rs11240305_C	0.00068	1	Ref
rs6859319_C	0.00068	1	Ref
rs13083138_A	0.00216	1	Ref
rs76731656_G	0.00167	1	Ref
rs4688172_G	0.00266	1	Ref
rs4688407_G	0.00069	1	Ref
rs56171387_G	0.00045	1	Ref
rs6470967_C	0.00346	1	Ref
rs6565018_A	0.00146	1	Ref
rs55921407_C	0.00121	1	Ref
rs1372361_C	0.00046	1	Ref
rs72775281_T	0.00299	1	Ref
rs1980266_T	0.00073	1	Ref
rs35449958_A	0.00073	1	Ref
rs6429709_A	0.00073	1	Ref
rs78788997_G	0.00074	1	Ref
rs10752140_T	0.00254	1	Ref
rs11595335_T	0.00075	1	Ref
rs2844664_C	0.00075	1	Ref
rs9364951_C	0.00075	1	Ref
rs972726_A	0.00152	1	Ref
rs7460237_A	0.00178	1	Ref
rs12716944_C	0.00127	1	Ref
rs7068018_T	0.0005	1	Ref
rs2291534_C	0.00256	1	Ref
rs11723221_A	0.00076	1	Ref
rs7831519_G	0.00128	1	Ref
rs7866156_A	0.0018	1	Ref
rs55734137_T	0.00129	1	Ref
rs1926598_C	0.00181	1	Ref
rs1000613_C	0.00259	1	Ref
rs34232451_C	0.00078	1	Ref
rs2679445_T	0.00131	1	Ref
rs11731374_C	0.00105	1	Ref
rs6869034_G	0.00105	1	Ref
rs2406127_C	0.00079	1	Ref
rs60196651_G	0.00079	1	Ref
rs9381793_G	0.00079	1	Ref
rs9694509_A	0.00106	1	Ref
rs11921435_A	0.00054	1	Ref
rs11130931_G	0.00082	1	Ref
rs2813392_A	0.00082	1	Ref
rs57589683_T	0.00082	1	Ref
rs77508548_C	0.00082	1	Ref
rs9347228_C	0.00056	1	Ref
rs73235919_G	0.00083	1	Ref
rs74761007_C	0.00083	1	Ref
rs56121699_G	0.00137	1	Ref
rs11779068_C	0.00057	1	Ref
rs2152637_G	0.00084	1	Ref
rs11722195_T	0.00138	1	Ref
rs6668887_T	0.00085	1	Ref
rs11844124_G	0.00086	1	Ref
rs2406125_G	0.00086	1	Ref
rs6928723_C	0.00114	1	Ref
rs72795079_T	0.00087	1	Ref
rs2709467_C	0.00251	1	Ref
rs1516911_A	0.0017	1	Ref
rs10263336_G	0.00088	1	Ref
rs10168705_A	0.00445	1	Ref
rs3095342_C	0.00061	1	Ref
rs10072579_C	0.00117	1	Ref
rs4730629_G	0.00117	1	Ref
rs74718228_T	0.0009	1	Ref
rs61965278_G	0.00118	1	Ref
rs34566304_C	0.00063	1	Ref
rs4684925_G	0.00091	1	Ref
rs55673370_G	0.00119	1	Ref
rs17044110_C	0.00147	1	Ref
rs4562127_G	0.00147	1	Ref
rs10211283_G	0.00064	1	Ref
rs1421665_C	0.00121	1	Ref
rs56157163_G	0.00093	1	Ref
rs76247745_T	0.00093	1	Ref
rs76418747_C	0.00065	1	Ref
rs4738590_C	0.00178	1	Ref
rs57399731_A	0.0015	1	Ref
rs12110284_C	0.00122	1	Ref
rs10057469_G	0.00094	1	Ref
rs2043002_C	0.00094	1	Ref
rs12878241_A	0.00123	1	Ref
rs17165631_C	0.0018	1	Ref
rs2886480_T	0.0038	1	Ref
rs687557_T	0.00096	1	Ref
rs61793214_C	0.00039	1	Ref
rs72795051_C	0.00068	1	Ref
rs9530362_C	0.00097	1	Ref
rs116566032_G	0.0004	1	Ref
rs66678247_T	0.00098	1	Ref
rs59666483_C	0.00156	1	Ref
rs34161654_C	0.00129	1	Ref
rs11012448_A	0.00304	1	Ref
rs10897085_T	0.00217	1	Ref
rs10776959_C	0.00042	1	Ref
rs11887729_G	0.00072	1	Ref
rs1283_G	0.00072	1	Ref
rs12885158_C	0.00454	1	Ref
rs4660585_G	0.00043	1	Ref
rs60129418_A	0.00102	1	Ref
rs10828163_G	0.00073	1	Ref
rs35150496_G	0.00073	1	Ref
rs2042064_C	0.00103	1	Ref
rs7674055_T	0.00104	1	Ref
rs9262294_C	0.00104	1	Ref
rs1891354_G	0.00253	1	Ref
rs77895457_T	0.00134	1	Ref
rs12438959_G	0.00224	1	Ref
rs58568383_T	0.00105	1	Ref
rs12507613_G	0.00046	1	Ref
rs13108882_G	0.00077	1	Ref
rs10751805_T	0.00047	1	Ref
rs4708789_G	0.00047	1	Ref
rs4885215_T	0.00229	1	Ref
rs10105287_G	0.00108	1	Ref
rs827852_C	0.00048	1	Ref
rs6720301_T	0.0017	1	Ref
rs7813573_C	0.0017	1	Ref
rs12372613_A	0.00049	1	Ref
rs11065495_C	0.0008	1	Ref
rs2122029_A	0.0008	1	Ref
rs55877192_A	0.00142	1	Ref
rs28757743_G	0.00419	1	Ref
rs137974539_T	0.0005	1	Ref
rs28535226_C	0.0005	1	Ref
rs28544078_G	0.0005	1	Ref
rs7084757_C	0.0005	1	Ref
rs13435545_T	0.00112	1	Ref
rs2438355_A	0.00112	1	Ref
rs2317119_T	0.00206	1	Ref
rs11230348_T	0.00113	1	Ref
rs58387887_C	0.00082	1	Ref
rs2866810_G	0.00051	1	Ref
rs4503614_G	0.00145	1	Ref
rs116884586_G	0.00052	1	Ref
rs6821191_G	0.00334	1	Ref
rs115416278_G	0.00053	1	Ref
rs4660600_G	0.00212	1	Ref
rs66786238_G	0.00054	1	Ref
rs151023856_C	0.00149	1	Ref
rs17002823_T	0.00149	1	Ref
rs642579_C	0.00118	1	Ref
rs11649028_G	0.00182	1	Ref
rs193016457_G	0.00055	1	Ref
rs827873_A	0.00087	1	Ref
rs1264329_G	0.00119	1	Ref
rs61086645_A	0.00119	1	Ref
rs116072255_C	0.00088	1	Ref
rs33913544_C	0.00634	1	Ref
rs9994167_A	0.00185	1	Ref
rs200185252_A	0.00153	1	Ref
rs4709187_G	0.00057	1	Ref
rs75836170_G	0.00057	1	Ref
rs10102664_G	0.00154	1	Ref
rs34713644_G	0.0009	1	Ref
rs60342811_C	0.0009	1	Ref
rs184793_C	0.00059	1	Ref
rs6933253_G	0.00126	1	Ref
rs2351027_C	0.00127	1	Ref
rs112189726_G	0.00061	1	Ref
rs117196562_A	0.00061	1	Ref
rs2074399_G	0.00028	1	Ref
rs7564310_G	0.00128	1	Ref
rs2054398_A	0.00129	1	Ref
rs12357784_C	0.00063	1	Ref
rs6465387_C	0.00165	1	Ref
rs12432561_G	0.00098	1	Ref
rs6574363_C	0.00132	1	Ref
rs113736768_G	0.00031	1	Ref
rs7097882_G	0.00099	1	Ref
rs9311055_A	0.00303	1	Ref
rs6919575_G	0.001	1	Ref
rs4588836_G	0.00135	1	Ref
rs8021523_A	0.00067	1	Ref
rs10803350_T	0.00171	1	Ref
rs148842602_T	0.00171	1	Ref
rs9929066_G	0.00068	1	Ref
rs12884100_A	0.00103	1	Ref
rs256938_A	0.00104	1	Ref
rs1754411_G	0.00107	1	Ref
rs6960464_A	0.00107	1	Ref
rs6992072_T	0.00072	1	Ref
rs7767157_A	0.00072	1	Ref
rs4863519_C	0.00143	1	Ref
rs66516926_G	0.00108	1	Ref
rs1891350_G	0.00074	1	Ref
rs4297025_A	0.00074	1	Ref
rs28490330_C	0.00039	1	Ref
rs6785102_C	0.00075	1	Ref
rs73912715_C	0.00075	1	Ref
rs262824_T	0.0022	1	Ref
rs2844663_C	0.0022	1	Ref
rs35792668_A	0.00076	1	Ref
rs60597763_G	0.00076	1	Ref
rs142903089_C	0.0004	1	Ref
rs72652964_T	0.00149	1	Ref
rs113297581_G	0.00077	1	Ref
rs7817694_C	0.00077	1	Ref
rs1949371_A	0.00223	1	Ref
rs56793872_G	0.00151	1	Ref
rs1015812_G	0.00224	1	Ref
rs112116223_T	0.00079	1	Ref
rs35850830_C	0.00153	1	Ref
rs2394856_G	0.00118	1	Ref
rs55960888_A	0.00118	1	Ref
rs58748161_T	0.00081	1	Ref
rs7156390_T	0.00081	1	Ref
rs2844655_G	0.00044	1	Ref
rs78333273_G	0.00045	1	Ref
rs10054331_C	0.0012	1	Ref
rs7332024_C	0.00084	1	Ref
rs12321716_C	0.00086	1	Ref
rs1889446_T	0.00277	1	Ref
rs13082502_G	0.00087	1	Ref
rs67900149_A	0.00087	1	Ref
rs11240299_G	0.00049	1	Ref
rs58211692_G	0.00049	1	Ref
rs59060130_G	0.00126	1	Ref
rs13437574_T	0.0028	1	Ref
rs117597747_C	0.0005	1	Ref
rs2443079_A	0.00089	1	Ref
rs13131841_C	0.00553	1	Ref
rs12927083_G	0.00129	1	Ref
rs1689357_A	0.00129	1	Ref
rs16873506_T	0.00091	1	Ref
rs827870_A	0.00091	1	Ref
rs11816709_G	0.00053	1	Ref
rs28568918_C	0.00053	1	Ref
rs9369905_C	0.0025	1	Ref
rs34071927_G	0.00093	1	Ref
rs7043331_T	0.00172	1	Ref
rs35249114_T	0.00291	1	Ref
rs4859900_A	0.00054	1	Ref
rs673855_C	0.00054	1	Ref
rs2225148_A	0.00173	1	Ref
rs192435123_G	0.00094	1	Ref
rs827867_A	0.00094	1	Ref
rs11593585_G	0.00055	1	Ref
rs71563003_G	0.00055	1	Ref
rs6924843_G	0.00056	1	Ref
rs9667664_G	0.00098	1	Ref
rs3812096_T	0.00464	1	Ref
rs113321184_G	0.00099	1	Ref
rs34415272_G	0.00099	1	Ref
rs74399945_C	0.00099	1	Ref
rs7439117_C	0.00181	1	Ref
rs34202807_G	0.00101	1	Ref
rs73751285_A	0.00101	1	Ref
rs13109582_C	0.0006	1	Ref
rs6941081_A	0.0006	1	Ref
rs9543737_A	0.00102	1	Ref
rs80301981_T	0.00144	1	Ref
rs4365300_C	0.00145	1	Ref
rs9460775_G	0.00104	1	Ref
rs2535325_C	0.00146	1	Ref
rs28611177_G	0.00522	1	Ref
rs6992610_T	0.00063	1	Ref
rs747334_A	0.00481	1	Ref
rs638734_G	0.00105	1	Ref
rs61285555_G	0.00064	1	Ref
rs7022513_C	0.00064	1	Ref
rs10809606_T	0.00107	1	Ref
rs7898623_A	0.00065	1	Ref
rs28681160_C	0.00067	1	Ref
rs12634739_G	0.0011	1	Ref
rs8019099_C	0.00154	1	Ref
rs57945649_T	0.00111	1	Ref
rs6780162_C	0.00112	1	Ref
rs72775230_C	0.00112	1	Ref
rs6712849_C	0.00069	1	Ref
rs111249465_A	0.00071	1	Ref
rs10143161_G	0.00341	1	Ref
rs4546268_T	0.00074	1	Ref
rs7914197_A	0.00074	1	Ref
rs1891353_C	0.00298	1	Ref
rs111249770_G	0.00075	1	Ref
rs4722677_A	0.00075	1	Ref
rs4749774_T	0.00076	1	Ref
rs10901338_T	0.00077	1	Ref
rs72795073_C	0.00077	1	Ref
rs9262289_T	0.00078	1	Ref
rs6747251_C	0.00264	1	Ref
rs6848635_G	0.00126	1	Ref
rs59932446_G	0.0008	1	Ref
rs76334132_G	0.00127	1	Ref
rs55883908_T	0.00081	1	Ref
rs1169722_G	0.00082	1	Ref
rs8023915_G	0.00036	1	Ref
rs28591087_G	0.00225	1	Ref
rs7185658_A	0.00225	1	Ref
rs827855_G	0.00085	1	Ref
rs547737032_C	0.00133	1	Ref
rs1642645_A	0.00039	1	Ref
rs72653000_C	0.00087	1	Ref
rs1010728_G	0.00136	1	Ref
rs113978639_G	0.00186	1	Ref
rs9262292_G	0.00041	1	Ref
rs10776957_T	0.00138	1	Ref
rs2358597_A	0.0009	1	Ref
rs2548351_T	0.0009	1	Ref
rs72820285_C	0.0009	1	Ref
rs1264317_C	0.00042	1	Ref
rs10076839_G	0.0014	1	Ref
rs1395058_G	0.0014	1	Ref
rs4266632_A	0.00093	1	Ref
rs6986207_G	0.00093	1	Ref
rs76569059_C	0.00044	1	Ref
rs7158298_G	0.00094	1	Ref
rs1837848_G	0.00194	1	Ref
rs642743_C	0.00095	1	Ref
rs6824796_T	0.00245	1	Ref
rs55861231_C	0.00096	1	Ref
rs1806876_C	0.00046	1	Ref
rs11159840_G	0.00197	1	Ref
rs77871269_T	0.00147	1	Ref
rs10077219_G	0.00048	1	Ref
rs196347_G	0.00048	1	Ref
rs1572170_A	0.00151	1	Ref
rs11650428_C	0.00049	1	Ref
rs6562841_C	0.00049	1	Ref
rs6954471_C	0.00049	1	Ref
rs12987800_T	0.00101	1	Ref
rs2676728_G	0.00619	1	Ref
rs4950970_G	0.00051	1	Ref
rs6777674_G	0.00156	1	Ref
rs11065484_G	0.00053	1	Ref
rs78308467_G	0.00053	1	Ref
rs9564826_T	0.00053	1	Ref
rs10202733_A	0.00106	1	Ref
rs3850472_C	0.00213	1	Ref
rs13357786_G	0.00055	1	Ref
rs180953596_C	0.00055	1	Ref
rs6784860_C	0.00215	1	Ref
rs4259983_C	0.00056	1	Ref
rs77527063_C	0.00056	1	Ref
rs10495682_T	0.00165	1	Ref
rs58071934_C	0.00165	1	Ref
rs201658819_T	0.00112	1	Ref
rs678292_G	0.00058	1	Ref
rs9395502_G	0.00058	1	Ref
rs13408263_G	0.00059	1	Ref
rs140928958_G	0.00059	1	Ref
rs6799148_C	0.0006	1	Ref
rs181298223_C	0.00061	1	Ref
rs740485_C	0.00061	1	Ref
rs12643573_A	0.00062	1	Ref
rs1501281_T	0.00062	1	Ref
rs753726_G	0.00062	1	Ref
rs17156636_C	0.00064	1	Ref
rs9327910_T	0.00064	1	Ref
rs13397930_A	0.00233	1	Ref
rs61795163_C	0.00121	1	Ref
rs141964789_G	0.00122	1	Ref
rs262819_A	0.00066	1	Ref
rs7643728_C	0.0018	1	Ref
rs7964553_T	0.00067	1	Ref
rs10264581_G	0.00068	1	Ref
rs12405099_C	0.00068	1	Ref
rs7906562_A	0.00068	1	Ref
rs13151026_T	0.00183	1	Ref
rs11012437_C	0.00069	1	Ref
rs11593591_G	0.0007	1	Ref
rs1931456_T	0.00071	1	Ref
rs7146166_T	0.00071	1	Ref
rs7801063_C	0.00071	1	Ref
rs9805877_G	0.00071	1	Ref
rs2096164_G	0.0013	1	Ref
rs7095293_A	0.00131	1	Ref
rs77232851_G	0.00131	1	Ref
rs56832078_C	0.00073	1	Ref
rs17389770_C	0.00074	1	Ref
rs76350209_G	0.00193	1	Ref
rs6886503_C	0.00253	1	Ref
rs6728515_G	0.00075	1	Ref
rs7642736_C	0.00135	1	Ref
rs12696092_G	0.00078	1	Ref
rs34697514_T	0.00078	1	Ref
rs7462628_T	0.00078	1	Ref
rs3128973_T	0.00079	1	Ref
rs9262251_G	0.00079	1	Ref
rs6451664_T	0.00081	1	Ref
rs9341603_C	0.00081	1	Ref
rs2057019_C	0.00268	1	Ref
rs13302881_C	0.00082	1	Ref
rs3130792_T	0.00145	1	Ref
rs55991107_G	0.00145	1	Ref
rs41273021_C	0.00084	1	Ref
rs62108836_G	0.00084	1	Ref
rs11931007_T	0.0021	1	Ref
rs35556756_A	0.00148	1	Ref
rs28885193_G	0.00087	1	Ref
rs2759281_T	0.00154	1	Ref
rs13094534_G	0.00155	1	Ref
rs2391402_G	0.00092	1	Ref
rs74836997_T	0.00092	1	Ref
rs2679443_T	0.00158	1	Ref
rs13180552_T	0.00095	1	Ref
rs58065886_G	0.00095	1	Ref
rs12910996_C	0.00163	1	Ref
rs116394289_C	0.00098	1	Ref
rs35729644_G	0.00099	1	Ref
rs35941406_G	0.00032	1	Ref
rs1976987_A	0.00101	1	Ref
rs11738191_A	0.00308	1	Ref
rs10141995_C	0.00034	1	Ref
rs11239119_G	0.00175	1	Ref
rs12650649_C	0.00176	1	Ref
rs4859514_G	0.00106	1	Ref
rs13406425_C	0.00108	1	Ref
rs2406117_C	0.00109	1	Ref
rs737017_A	0.00109	1	Ref
rs67888371_G	0.00182	1	Ref
rs73242618_A	0.00113	1	Ref
rs74732357_C	0.00041	1	Ref
rs7756620_T	0.00041	1	Ref
rs146287839_C	0.00114	1	Ref
rs12911382_G	0.00042	1	Ref
rs2252863_G	0.00042	1	Ref
rs2532942_C	0.00043	1	Ref
rs16922104_A	0.00117	1	Ref
rs11012436_G	0.00118	1	Ref
rs7006330_G	0.00118	1	Ref
rs10803351_G	0.00193	1	Ref
rs13184723_C	0.00119	1	Ref
rs2271806_C	0.00119	1	Ref
rs10745408_C	0.00196	1	Ref
rs6846167_A	0.00122	1	Ref
rs148627674_G	0.00047	1	Ref
rs6973893_T	0.00047	1	Ref
rs10945540_G	0.00123	1	Ref
rs112310437_C	0.00124	1	Ref
rs12711961_A	0.00051	1	Ref
rs9936302_A	0.00208	1	Ref
rs10960280_C	0.00052	1	Ref
rs117022093_C	0.00053	1	Ref
rs28366137_C	0.00053	1	Ref
rs10034395_G	0.00054	1	Ref
rs11098434_G	0.00054	1	Ref
rs1935435_C	0.00054	1	Ref
rs6533290_G	0.00054	1	Ref
rs12102958_T	0.00055	1	Ref
rs2517575_A	0.00055	1	Ref
rs960941_A	0.00135	1	Ref
rs1455480_G	0.00059	1	Ref
rs6542647_C	0.00142	1	Ref
rs75602989_C	0.00142	1	Ref
rs10071470_T	0.0006	1	Ref
rs12339568_T	0.0006	1	Ref
rs35941327_G	0.0006	1	Ref
rs10745677_T	0.00061	1	Ref
rs11160331_G	0.00062	1	Ref
rs1408948_A	0.00063	1	Ref
rs2771428_G	0.00063	1	Ref
rs57501818_G	0.00063	1	Ref
rs73220281_G	0.00063	1	Ref
rs7772280_A	0.00148	1	Ref
rs3860617_G	0.00064	1	Ref
rs10479300_T	0.00065	1	Ref
rs3094109_G	0.00065	1	Ref
rs768905_T	0.00065	1	Ref
rs11012428_C	0.00066	1	Ref
rs2001839_C	0.00066	1	Ref
rs7072409_G	0.00068	1	Ref
rs7459873_A	0.00069	1	Ref
rs7836135_T	0.00069	1	Ref
rs3131030_A	0.00157	1	Ref
rs12716908_T	0.00158	1	Ref
rs640046_G	0.00071	1	Ref
rs13035160_G	0.00161	1	Ref
rs1417184_C	0.00073	1	Ref
rs2709465_C	0.00074	1	Ref
rs57628137_T	0.00074	1	Ref
rs7901323_C	0.00074	1	Ref
rs180878695_G	0.00075	1	Ref
rs7914249_T	0.00075	1	Ref
rs10428319_G	0.00076	1	Ref
rs28366124_T	0.00076	1	Ref
rs593151_A	0.00076	1	Ref
rs66732052_T	0.00076	1	Ref
rs112373899_C	0.00077	1	Ref
rs7672518_T	0.00077	1	Ref
rs80034033_A	0.00079	1	Ref
rs1592754_C	0.00356	1	Ref
rs1489694_A	0.00084	1	Ref
rs67955617_T	0.00084	1	Ref
rs13434948_C	0.00085	1	Ref
rs59332094_T	0.00085	1	Ref
rs6919917_C	0.00085	1	Ref
rs2389711_C	0.00086	1	Ref
rs6824793_T	0.00278	1	Ref
rs1176793_T	0.00087	1	Ref
rs6758385_G	0.00087	1	Ref
rs11595047_T	0.00185	1	Ref
rs9318296_C	0.00089	1	Ref
rs601986_C	0.0009	1	Ref
rs17805348_T	0.00091	1	Ref
rs78319122_T	0.00091	1	Ref
rs9349492_C	0.00092	1	Ref
rs13390546_C	0.00194	1	Ref
rs357122_C	0.00095	1	Ref
rs4859898_T	0.00095	1	Ref
rs78046968_T	0.00095	1	Ref
rs80114931_A	0.00097	1	Ref
rs13150610_G	0.00099	1	Ref
rs4951145_T	0.001	1	Ref
rs6553855_A	0.00101	1	Ref
rs76779176_T	0.00103	1	Ref
rs6835806_C	0.00104	1	Ref
rs1363103_T	0.00106	1	Ref
rs4904421_C	0.00108	1	Ref
rs839105_C	0.0011	1	Ref
rs262816_A	0.00114	1	Ref
rs2471568_C	0.00115	1	Ref
rs10190731_C	0.00118	1	Ref
rs72983417_C	0.00118	1	Ref
rs2517463_C	0.00348	1	Ref
rs9940095_A	0.00125	1	Ref
rs9542701_A	0.00129	1	Ref
rs10903494_T	0.0013	1	Ref
rs12102248_A	0.00132	1	Ref
rs7893616_T	0.00381	1	Ref
rs11012438_G	0.00141	1	Ref
rs10498910_A	0.00145	1	Ref
rs9849812_A	0.00147	1	Ref
rs13061579_C	0.00148	1	Ref
rs12894641_A	0.00158	1	Ref
rs17507699_T	0.00162	1	Ref
rs72775283_G	0.00164	1	Ref
rs13177180_G	0.00031	1	Ref
rs3801321_T	0.00033	1	Ref
rs17189763_C	0.00036	1	Ref
rs2249459_C	0.00036	1	Ref
rs4460349_A	0.00177	1	Ref
rs473030_C	0.00038	1	Ref
rs827856_G	0.00038	1	Ref
rs117023276_G	0.00039	1	Ref
rs57469282_A	0.00042	1	Ref
rs2394449_A	0.00192	1	Ref
rs4899940_A	0.00192	1	Ref
rs10072849_C	0.00044	1	Ref
rs73242632_C	0.00044	1	Ref
rs4433000_C	0.00047	1	Ref
rs2532940_G	0.00049	1	Ref
rs827871_A	0.00049	1	Ref
rs11846693_G	0.00051	1	Ref
rs12572135_C	0.00051	1	Ref
rs4709186_T	0.00051	1	Ref
rs4473672_G	0.00053	1	Ref
rs4863699_T	0.00053	1	Ref
rs56036638_C	0.00054	1	Ref
rs1754412_T	0.00055	1	Ref
rs2315071_C	0.00055	1	Ref
rs62260803_C	0.00055	1	Ref
rs76060784_G	0.00056	1	Ref
rs28796999_T	0.0022	1	Ref
rs7328344_G	0.00058	1	Ref
rs827858_T	0.00058	1	Ref
rs12513233_G	0.00059	1	Ref
rs3130793_T	0.00059	1	Ref
rs76459192_G	0.00061	1	Ref
rs62108847_G	0.00062	1	Ref
rs3095346_C	0.00063	1	Ref
rs6533390_T	0.00064	1	Ref
rs1363101_T	0.00066	1	Ref
rs1379134_T	0.00066	1	Ref
rs1977897_G	0.00066	1	Ref
rs2443091_G	0.00067	1	Ref
rs6596578_A	0.00067	1	Ref
rs7827069_C	0.00067	1	Ref
rs75560618_T	0.0024	1	Ref
rs117210812_C	0.00068	1	Ref
rs11969816_G	0.00068	1	Ref
rs34613719_C	0.00068	1	Ref
rs68172709_C	0.00068	1	Ref
rs72652999_C	0.00068	1	Ref
rs7809367_C	0.00068	1	Ref
rs9350675_C	0.00069	1	Ref
rs9737637_A	0.00069	1	Ref
rs73042339_C	0.0007	1	Ref
rs8014682_T	0.0007	1	Ref
rs34530338_G	0.00071	1	Ref
rs35667589_A	0.00071	1	Ref
rs7010335_G	0.00071	1	Ref
rs1441808_T	0.00072	1	Ref
rs6665995_A	0.00072	1	Ref
rs7607140_G	0.00072	1	Ref
rs10806695_T	0.00073	1	Ref
rs16892067_A	0.00073	1	Ref
rs3095351_C	0.00073	1	Ref
rs8019631_G	0.00074	1	Ref
rs11130929_A	0.0008	1	Ref
rs2532933_A	0.00081	1	Ref
rs6834463_G	0.00637	1	Ref
rs6858989_C	0.00082	1	Ref
rs76762504_A	0.00082	1	Ref
rs2438368_G	0.00083	1	Ref
rs11852724_G	0.00084	1	Ref
rs9456291_G	0.00084	1	Ref
rs11917412_A	0.00086	1	Ref
rs4660211_T	0.00086	1	Ref
rs1410163_T	0.00089	1	Ref
rs28806522_T	0.0009	1	Ref
rs72750316_G	0.0009	1	Ref
rs28465174_A	0.00092	1	Ref
rs11012466_T	0.00094	1	Ref
rs13357845_A	0.00095	1	Ref
rs2415023_G	0.00095	1	Ref
rs9564824_A	0.00097	1	Ref
rs11012451_T	0.00098	1	Ref
rs7689226_T	0.00098	1	Ref
rs7915328_T	0.00099	1	Ref
rs7821671_C	0.001	1	Ref
rs57991475_A	0.00104	1	Ref
rs6784143_C	0.00104	1	Ref
rs10164620_G	0.00109	1	Ref
rs11937191_T	0.00109	1	Ref
rs2165567_A	0.00109	1	Ref
rs10173912_C	0.00112	1	Ref
rs2535337_A	0.00119	1	Ref
rs12657123_T	0.00124	1	Ref
rs6827092_G	0.00128	1	Ref
rs10455066_T	0.00129	1	Ref
rs4971486_C	0.00134	1	Ref
rs111665483_C	0.0014	1	Ref
rs2220782_T	0.00145	1	Ref
rs1447807_A	0.00147	1	Ref
rs192528221_G	0.00152	1	Ref
rs9457351_A	0.00154	1	Ref
rs78942226_A	0.00159	1	Ref
rs6436000_T	0.00425	1	Ref
rs6455579_C	0.0017	1	Ref
rs6929686_A	0.00175	1	Ref
rs1075488_C	0.005	1	Ref
rs13411840_A	0.00235	1	Ref
rs7159378_G	0.00236	1	Ref
rs10026915_C	0.00094	1	Ref
rs10117546_G	0.00069	1	Ref
rs10216927_A	0.00294	1	Ref
rs10270704_A	0.0016	1	Ref
rs10477835_T	0.00079	1	Ref
rs10856991_C	0.00144	1	Ref
rs10858409_G	0.00055	1	Ref
rs10885543_G	0.00058	1	Ref
rs10900430_A	0.0008	1	Ref
rs11012422_G	0.00064	1	Ref
rs11012443_T	0.00135	1	Ref
rs111415059_G	0.00053	1	Ref
rs112208963_C	0.00051	1	Ref
rs113573208_A	0.00199	1	Ref
rs114998182_G	0.00055	1	Ref
rs11595472_G	0.00102	1	Ref
rs11621703_G	0.00155	1	Ref
rs11886179_C	0.00106	1	Ref
rs11887422_C	0.00038	1	Ref
rs11904437_A	0.00054	1	Ref
rs12150130_C	0.00062	1	Ref
rs12345126_T	0.00214	1	Ref
rs12435477_G	0.00064	1	Ref
rs12509281_A	0.00139	1	Ref
rs1264327_G	0.00042	1	Ref
rs1264332_G	0.00048	1	Ref
rs13078786_G	0.00074	1	Ref
rs13357251_G	0.00033	1	Ref
rs1479385_C	0.00058	1	Ref
rs1493415_G	0.00066	1	Ref
rs17044095_T	0.00087	1	Ref
rs17485977_G	0.00061	1	Ref
rs17828496_G	0.00053	1	Ref
rs1816776_T	0.00068	1	Ref
rs185652176_C	0.00037	1	Ref
rs188405981_G	0.00171	1	Ref
rs2036458_T	0.00056	1	Ref
rs2057020_C	0.00085	1	Ref
rs2074506_G	0.00061	1	Ref
rs2227902_G	0.0006	1	Ref
rs2290345_C	0.00127	1	Ref
rs2355159_C	0.00062	1	Ref
rs2406128_G	0.00148	1	Ref
rs2532935_C	0.00049	1	Ref
rs256977_C	0.00107	1	Ref
rs2596541_C	0.00049	1	Ref
rs2676706_C	0.0024	1	Ref
rs2813385_C	0.00099	1	Ref
rs28366144_A	0.00091	1	Ref
rs28373082_C	0.00096	1	Ref
rs2844522_G	0.00146	1	Ref
rs28474684_A	0.00071	1	Ref
rs28514797_G	0.00056	1	Ref
rs3095352_C	0.00072	1	Ref
rs3131027_T	0.00056	1	Ref
rs34442071_G	0.00058	1	Ref
rs35302734_C	0.0005	1	Ref
rs357123_C	0.00041	1	Ref
rs357127_C	0.00113	1	Ref
rs357130_A	0.0004	1	Ref
rs35946663_G	0.00036	1	Ref
rs368015499_C	0.00044	1	Ref
rs4283691_G	0.00097	1	Ref
rs4331798_G	0.00283	1	Ref
rs4709193_C	0.00142	1	Ref
rs4884951_A	0.00112	1	Ref
rs4950971_G	0.00038	1	Ref
rs57123654_T	0.00061	1	Ref
rs60620552_A	0.00119	1	Ref
rs61795453_C	0.00365	1	Ref
rs62108788_G	0.00061	1	Ref
rs62180954_G	0.00048	1	Ref
rs6489796_T	0.00058	1	Ref
rs649254_T	0.00151	1	Ref
rs6538026_T	0.00061	1	Ref
rs6538028_A	0.00206	1	Ref
rs6572045_T	0.00063	1	Ref
rs6787031_C	0.00049	1	Ref
rs6815667_T	0.00113	1	Ref
rs685229_A	0.00058	1	Ref
rs7009805_A	0.00074	1	Ref
rs7024392_C	0.00071	1	Ref
rs7095757_A	0.00057	1	Ref
rs72775257_G	0.00116	1	Ref
rs72775279_T	0.00214	1	Ref
rs72790536_G	0.00062	1	Ref
rs7308710_C	0.00065	1	Ref
rs73827443_T	0.00082	1	Ref
rs74465099_T	0.00182	1	Ref
rs75451488_G	0.00086	1	Ref
rs7573370_G	0.00267	1	Ref
rs7614411_A	0.00057	1	Ref
rs76221427_A	0.00219	1	Ref
rs7801320_G	0.00054	1	Ref
rs78317787_T	0.00045	1	Ref
rs78947379_G	0.00096	1	Ref
rs8012241_C	0.00072	1	Ref
rs839150_A	0.00075	1	Ref
rs863395_G	0.00062	1	Ref
rs874014_A	0.0008	1	Ref
rs9350677_T	0.0008	1	Ref
rs9355651_T	0.00093	1	Ref
rs9364933_T	0.00057	1	Ref
rs9600356_C	0.00127	1	Ref
rs9870274_G	0.00136	1	Ref
rs997334_A	0.00114	1	Ref
rs2252760_G	0.00416	1	Ref
rs6981568_G	0.00288	1	Ref
rs1176953_A	0.00229	1	Ref
rs2532921_C	0.00192	1	Ref
rs55983965_T	0.00187	1	Ref
rs862411_A	0.00179	1	Ref
rs58193290_T	0.00163	1	Ref
rs76059978_T	0.00155	1	Ref
rs827863_T	0.00152	1	Ref
rs749573_T	0.00149	1	Ref
rs9352397_C	0.00648	1	Ref
rs11872184_G	0.00146	1	Ref
rs61793233_C	0.00393	1	Ref
rs12343160_T	0.00629	1	Ref
rs10756292_G	0.00135	1	Ref
rs9542702_A	0.00134	1	Ref
rs78218438_G	0.0013	1	Ref
rs6846527_C	0.00125	1	Ref
rs11624387_G	0.00123	1	Ref
rs1572202_G	0.00121	1	Ref
rs3913816_T	0.00121	1	Ref
rs2388741_C	0.00119	1	Ref
rs4993299_A	0.00119	1	Ref
rs6471602_G	0.00119	1	Ref
rs2043005_C	0.00117	1	Ref
rs7725727_G	0.00117	1	Ref
rs9395496_T	0.00117	1	Ref
rs7728625_T	0.00116	1	Ref
rs2443085_C	0.00115	1	Ref
rs2148973_T	0.00114	1	Ref
rs1154140_G	0.00113	1	Ref
rs9542697_A	0.00112	1	Ref
rs61001950_T	0.0011	1	Ref
rs1327711_A	0.00109	1	Ref
rs11012442_A	0.00108	1	Ref
rs13353548_G	0.00107	1	Ref
rs11929843_A	0.00106	1	Ref
rs10477834_A	0.00102	1	Ref
rs3755904_G	0.001	1	Ref
rs6455580_A	0.001	1	Ref
rs77394196_C	0.001	1	Ref
rs6845600_T	0.00097	1	Ref
rs1264307_G	0.00095	1	Ref
rs7621881_C	0.00095	1	Ref
rs9347229_T	0.00092	1	Ref
rs2244356_G	0.00091	1	Ref
rs1545280_T	0.00089	1	Ref
rs139127946_G	0.00088	1	Ref
rs71402282_C	0.00087	1	Ref
rs117849444_A	0.00086	1	Ref
rs1342209_T	0.00086	1	Ref
rs1891351_C	0.00086	1	Ref
rs2596559_A	0.00083	1	Ref
rs6455574_C	0.00083	1	Ref
rs1899952_A	0.00082	1	Ref
rs9848831_G	0.00081	1	Ref
rs12507708_A	0.00078	1	Ref
rs7620377_G	0.00077	1	Ref
rs7192566_T	0.00075	1	Ref
rs7730865_G	0.00075	1	Ref
rs2134459_G	0.00074	1	Ref
rs28893806_T	0.00072	1	Ref
rs11598774_C	0.00071	1	Ref
rs12002165_G	0.00071	1	Ref
rs12265349_G	0.00071	1	Ref
rs13353589_C	0.0007	1	Ref
rs35066366_G	0.0007	1	Ref
rs9921827_T	0.0007	1	Ref
rs12113501_G	0.00069	1	Ref
rs262827_A	0.00069	1	Ref
rs9819997_A	0.00069	1	Ref
rs1992733_A	0.00068	1	Ref
rs2523474_A	0.00068	1	Ref
rs57868780_G	0.00068	1	Ref
rs61793212_T	0.00068	1	Ref
rs112014751_C	0.00067	1	Ref
rs13065596_G	0.00066	1	Ref
rs2315072_A	0.00066	1	Ref
rs34110030_G	0.00064	1	Ref
rs72795028_C	0.00064	1	Ref
rs17105315_G	0.00063	1	Ref
rs7856365_G	0.00063	1	Ref
rs3860618_T	0.00062	1	Ref
rs6451670_A	0.00061	1	Ref
rs3911240_G	0.0006	1	Ref
rs79569730_T	0.0006	1	Ref
rs209811_A	0.00059	1	Ref
rs36211802_C	0.00059	1	Ref
rs55932461_C	0.00058	1	Ref
rs705953_A	0.00375	1	Ref
rs9870936_A	0.00055	1	Ref
rs117366037_A	0.00054	1	Ref
rs2532929_A	0.00054	1	Ref
rs12405378_C	0.00212	1	Ref
rs11160333_C	0.00052	1	Ref
rs4661574_A	0.00052	1	Ref
rs4708782_C	0.00052	1	Ref
rs6836627_T	0.00052	1	Ref
rs11097980_C	0.00051	1	Ref
rs4144361_A	0.00205	1	Ref
rs7973943_G	0.0005	1	Ref
rs12047221_G	0.00204	1	Ref
rs10437061_C	0.00049	1	Ref
rs11012440_T	0.00049	1	Ref
rs13096384_G	0.00049	1	Ref
rs9262288_A	0.00049	1	Ref
rs2143424_C	0.00048	1	Ref
rs4709175_T	0.00048	1	Ref
rs828002_A	0.00048	1	Ref
rs1806875_T	0.002	1	Ref
rs61795455_C	0.00047	1	Ref
rs6890021_A	0.00047	1	Ref
rs2535330_C	0.00046	1	Ref
rs1493420_A	0.00045	1	Ref
rs2523453_C	0.00045	1	Ref
rs887381_T	0.00045	1	Ref
rs60905445_C	0.00341	1	Ref
rs2676725_C	0.00044	1	Ref
rs10809629_T	0.00043	1	Ref
rs2844542_C	0.00043	1	Ref
rs1418315_A	0.0004	1	Ref
rs12666259_A	0.00039	1	Ref
rs1980174_G	0.00176	1	Ref
rs61900767_T	0.00034	1	Ref
rs7094266_T	0.00432	1	Ref
rs10171199_A	0.00163	1	Ref
rs114359618_C	0.00029	1	Ref
rs7197080_C	0.0016	1	Ref
rs149300866_C	0.00027	1	Ref
rs72775275_A	0.00155	1	Ref
rs1832871_A	0.00149	1	Ref
rs3130655_T	0.00147	1	Ref
rs1073329_A	0.00144	1	Ref
rs62120868_G	0.00144	1	Ref
rs60940020_C	0.00266	1	Ref
rs76964124_G	0.00138	1	Ref
rs1039467_G	0.00132	1	Ref
rs72652997_C	0.00128	1	Ref
rs935852_G	0.00118	1	Ref
rs57928279_T	0.00116	1	Ref
rs72795057_A	0.00223	1	Ref
rs6850590_T	0.00221	1	Ref
rs13202158_G	0.00112	1	Ref
rs13383006_C	0.00112	1	Ref
rs3847800_A	0.00109	1	Ref
rs6455577_C	0.00212	1	Ref
rs11627296_C	0.00106	1	Ref
rs2873367_T	0.00105	1	Ref
rs9543733_C	0.00105	1	Ref
rs1932371_T	0.00104	1	Ref
rs9355650_G	0.00104	1	Ref
rs4709191_A	0.00205	1	Ref
rs6575380_A	0.001	1	Ref
rs10950640_G	0.00098	1	Ref
rs7929185_C	0.00097	1	Ref
rs2567992_A	0.00096	1	Ref
rs12651813_G	0.00091	1	Ref
rs72795043_C	0.00091	1	Ref
rs1264342_C	0.00088	1	Ref
rs791773_G	0.00088	1	Ref
rs2596542_C	0.00087	1	Ref
rs1350404_C	0.00182	1	Ref
rs10073505_G	0.00086	1	Ref
rs4083557_C	0.00084	1	Ref
rs13405535_G	0.00366	1	Ref
rs11012441_A	0.00173	1	Ref
rs930467_G	0.0008	1	Ref
rs11766524_C	0.00077	1	Ref
rs75604060_C	0.00166	1	Ref
rs1363105_C	0.00075	1	Ref
rs57829000_C	0.0043	1	Ref
rs1980173_C	0.00073	1	Ref
rs6817742_T	0.00072	1	Ref
rs188721350_C	0.00071	1	Ref
rs72775231_G	0.00158	1	Ref
rs10216952_C	0.00069	1	Ref
rs11622908_A	0.00069	1	Ref
rs10216561_T	0.00067	1	Ref
rs2523458_T	0.00066	1	Ref
rs62553775_C	0.00066	1	Ref
rs77279528_A	0.00151	1	Ref
rs7018061_T	0.0015	1	Ref
rs7212330_A	0.00065	1	Ref
rs13194647_A	0.00064	1	Ref
rs6489800_C	0.00147	1	Ref
rs10745407_T	0.00061	1	Ref
rs827868_T	0.00061	1	Ref
rs12586894_T	0.00142	1	Ref
rs13085667_A	0.00142	1	Ref
rs112007582_C	0.00059	1	Ref
rs7688422_G	0.00059	1	Ref
rs200948278_G	0.00056	1	Ref
rs2532920_C	0.00056	1	Ref
rs6470964_A	0.00215	1	Ref
rs531894_T	0.00055	1	Ref
rs74095902_A	0.00055	1	Ref
rs35342196_A	0.00134	1	Ref
rs3095344_C	0.00054	1	Ref
rs13164188_T	0.00133	1	Ref
rs6706785_G	0.00133	1	Ref
rs57886422_T	0.00129	1	Ref
rs2873368_C	0.00051	1	Ref
rs4630561_T	0.00051	1	Ref
rs4740398_A	0.00051	1	Ref
rs7136106_G	0.00051	1	Ref
rs77907709_G	0.00051	1	Ref
rs12906690_C	0.00126	1	Ref
rs654484_G	0.00126	1	Ref
rs10181444_T	0.00049	1	Ref
rs79942061_C	0.00049	1	Ref
rs11921202_T	0.00125	1	Ref
rs3095343_T	0.00048	1	Ref
rs113257011_C	0.00047	1	Ref
rs1847215_T	0.00047	1	Ref
rs1890914_A	0.00198	1	Ref
rs55936031_A	0.00122	1	Ref
rs67668653_G	0.00045	1	Ref
rs9866562_C	0.00045	1	Ref
rs1754406_C	0.00192	1	Ref
rs3130656_C	0.00116	1	Ref
rs2395485_T	0.00042	1	Ref
rs1363106_A	0.00188	1	Ref
rs141154199_G	0.00188	1	Ref
rs564692_A	0.00041	1	Ref
rs827854_A	0.00112	1	Ref
rs12512082_G	0.00902	1	Ref
rs4365752_T	0.0011	1	Ref
rs75292430_G	0.00038	1	Ref
rs75593714_G	0.00109	1	Ref
rs11876511_A	0.00108	1	Ref
rs12623196_G	0.00037	1	Ref
rs6981267_A	0.00037	1	Ref
rs1852808_C	0.00248	1	Ref
rs10900426_G	0.00036	1	Ref
rs10434012_T	0.00106	1	Ref
rs17061074_A	0.00106	1	Ref
rs7738138_T	0.00175	1	Ref
rs2471563_C	0.00103	1	Ref
rs10008529_C	0.00102	1	Ref
rs17156606_C	0.00033	1	Ref
rs3130652_G	0.00101	1	Ref
rs1361452_C	0.00165	1	Ref
rs67035778_T	0.00097	1	Ref
rs10809634_T	0.00096	1	Ref
rs6842731_A	0.00096	1	Ref
rs7644770_G	0.00096	1	Ref
rs839154_T	0.00096	1	Ref
rs34202070_C	0.00095	1	Ref
rs28492914_G	0.00092	1	Ref
rs6542641_A	0.00092	1	Ref
rs74534178_A	0.00157	1	Ref
rs60896484_A	0.00091	1	Ref
rs6597674_A	0.00091	1	Ref
rs9352400_A	0.00091	1	Ref
rs12901895_C	0.00089	1	Ref
rs2844654_T	0.00089	1	Ref
rs72820264_T	0.00089	1	Ref
rs77901312_C	0.00089	1	Ref
rs10960499_T	0.00086	1	Ref
rs1553386_G	0.00086	1	Ref
rs72795035_A	0.00148	1	Ref
rs561079_T	0.00084	1	Ref
rs8062866_G	0.00084	1	Ref
rs12909503_T	0.00209	1	Ref
rs182019291_A	0.00083	1	Ref
rs28714116_T	0.00203	1	Ref
rs17165628_A	0.0008	1	Ref
rs6789584_C	0.00079	1	Ref
rs1402626_A	0.00139	1	Ref
rs4740400_G	0.00139	1	Ref
rs11738197_A	0.00078	1	Ref
rs1545227_T	0.00077	1	Ref
rs7010674_A	0.00076	1	Ref
rs13085008_C	0.00135	1	Ref
rs6533358_A	0.00135	1	Ref
rs7688831_G	0.00135	1	Ref
rs1395060_C	0.00134	1	Ref
rs7336064_G	0.00133	1	Ref
rs11012463_A	0.00073	1	Ref
rs13107432_A	0.00132	1	Ref
rs74581751_C	0.00071	1	Ref
rs10900077_G	0.0007	1	Ref
rs2844529_G	0.0007	1	Ref
rs4569028_G	0.00069	1	Ref
rs667778_T	0.00069	1	Ref
rs28370990_C	0.00357	1	Ref
rs11930954_T	0.00126	1	Ref
rs10960498_T	0.00067	1	Ref
rs2315073_C	0.00067	1	Ref
rs111789763_T	0.00123	1	Ref
rs2517582_C	0.00066	1	Ref
rs3132576_G	0.00066	1	Ref
rs12002114_C	0.00065	1	Ref
rs75661265_C	0.00065	1	Ref
rs2465143_A	0.00177	1	Ref
rs11130932_G	0.00064	1	Ref
rs12103301_A	0.00064	1	Ref
rs10069663_G	0.00118	1	Ref
rs112259028_G	0.00117	1	Ref
rs2844525_T	0.00117	1	Ref
rs6542648_A	0.00117	1	Ref
rs57694037_G	0.00338	1	Ref
rs6898323_G	0.00061	1	Ref
rs62039978_A	0.00226	1	Ref
rs62329958_A	0.0006	1	Ref
rs7697219_G	0.0006	1	Ref
rs12343602_C	0.00169	1	Ref
rs36040276_A	0.00059	1	Ref
rs7783670_T	0.00059	1	Ref
rs12442246_A	0.00222	1	Ref
rs4534009_C	0.00058	1	Ref
rs10145823_C	0.00166	1	Ref
rs7840042_C	0.00166	1	Ref
rs35852981_G	0.00057	1	Ref
rs61772223_A	0.00057	1	Ref
rs72795042_C	0.00057	1	Ref
rs7335441_G	0.0011	1	Ref
rs9364957_T	0.00056	1	Ref
rs1584198_G	0.00055	1	Ref
rs2709466_T	0.00108	1	Ref
rs66484058_G	0.00161	1	Ref
rs28609047_C	0.0016	1	Ref
rs17795417_A	0.00107	1	Ref
rs4851978_G	0.00053	1	Ref
rs79535890_G	0.00157	1	Ref
rs6661460_A	0.00052	1	Ref
rs839156_A	0.00104	1	Ref
rs627502_A	0.00155	1	Ref
rs7755420_G	0.00103	1	Ref
rs736556_T	0.0005	1	Ref
rs1245320_T	0.00049	1	Ref
rs6996802_T	0.00049	1	Ref
rs827869_A	0.00201	1	Ref
rs4885216_A	0.0015	1	Ref
rs4708787_G	0.00099	1	Ref
rs76471893_G	0.00099	1	Ref
rs74039181_G	0.00302	1	Ref
rs111538459_T	0.00048	1	Ref
rs10078807_A	0.00148	1	Ref
rs12187903_C	0.00047	1	Ref
rs6602316_T	0.00047	1	Ref
rs2813384_C	0.00145	1	Ref
rs77808248_T	0.00143	1	Ref
rs2069331_A	0.0039	1	Ref
rs1505947_T	0.00093	1	Ref
rs6470957_G	0.00091	1	Ref
rs7699987_T	0.0009	1	Ref
rs79937119_A	0.00041	1	Ref
rs12915890_C	0.00136	1	Ref
rs13188479_A	0.00134	1	Ref
rs165491_G	0.00086	1	Ref
rs45518539_T	0.00133	1	Ref
rs2517573_T	0.00085	1	Ref
rs6602317_T	0.00274	1	Ref
rs4709185_T	0.00081	1	Ref
rs187806_C	0.00447	1	Ref
rs10129178_C	0.00444	1	Ref
rs6796386_C	0.00078	1	Ref
rs12618591_A	0.00077	1	Ref
rs2535336_A	0.00077	1	Ref
rs28366139_A	0.00166	1	Ref
rs408523_C	0.00166	1	Ref
rs11623400_G	0.00165	1	Ref
rs309946_A	0.0012	1	Ref
[truncated: 4,045 more rows]

## Sheet: GATA4 Ki values
SNP_Allele	Binding_Constant	FC_log2	Allele_Type
rs56924116_G	0.00459	1	Ref
rs16984782_C	0.00106	1	Ref
rs2844652_C	0.0048	1	Ref
rs73827437_C	0.00764	1	Ref
rs10052804_A	0.00248	1	Ref
rs585302_G	0.00862	1	Ref
rs10873389_G	0.00144	1	Ref
rs13353548_G	0.00271	1	Ref
rs2896074_G	0.00185	1	Ref
rs828004_G	0.0022	1	Ref
rs67900149_A	0.00201	1	Ref
rs6575379_C	0.0021	1	Ref
rs72795054_G	0.00069	1	Ref
rs7135177_G	0.00698	1	Ref
rs41308639_A	0.00108	1	Ref
rs36211802_C	0.00102	1	Ref
rs62108785_G	0.00278	1	Ref
rs117847346_C	0.00214	1	Ref
rs6865511_C	0.00276	1	Ref
rs4661575_C	0.01667	1	Ref
rs3850471_C	0.00046	1	Ref
rs6854989_C	0.00235	1	Ref
rs828003_C	0.00139	1	Ref
rs7844800_A	0.00413	1	Ref
rs28609375_C	0.00241	1	Ref
rs3847800_A	0.00335	1	Ref
rs147179715_G	0.00723	1	Ref
rs36054569_A	0.0008	1	Ref
rs7762096_C	0.00347	1	Ref
rs9318296_C	0.00618	1	Ref
rs56314493_T	0.00118	1	Ref
rs6986207_G	0.0006	1	Ref
rs1965836_A	0.00352	1	Ref
rs3899774_C	0.00185	1	Ref
rs10776955_C	0.00303	1	Ref
rs66691901_G	0.00089	1	Ref
rs4473672_G	0.00075	1	Ref
rs35066366_G	0.00173	1	Ref
rs839149_C	0.00394	1	Ref
rs10076839_G	0.0021	1	Ref
rs2186919_A	0.006	1	Ref
rs111249770_G	0.00076	1	Ref
rs2391936_C	0.00209	1	Ref
rs6894123_G	0.00187	1	Ref
rs1472787_T	0.00073	1	Ref
rs112373899_C	0.00082	1	Ref
rs17486117_C	0.02015	1	Ref
rs13221828_C	0.00107	1	Ref
rs10283652_G	0.00118	1	Ref
rs2043002_C	0.00057	1	Ref
rs9292865_C	0.00076	1	Ref
rs28880679_C	0.00273	1	Ref
rs479879_A	0.00564	1	Ref
rs57628137_T	0.01591	1	Ref
rs1363104_C	0.01869	1	Ref
rs16872933_C	0.00027	1	Ref
rs28721401_A	0.00258	1	Ref
rs57014213_A	0.00508	1	Ref
rs12920484_C	0.00101	1	Ref
rs72472134_C	0.00487	1	Ref
rs7338740_C	0.00162	1	Ref
rs2517457_C	0.00027	1	Ref
rs28681160_C	0.01384	1	Ref
rs72775257_G	0.00158	1	Ref
rs17481499_C	0.01142	1	Ref
rs580438_C	0.00234	1	Ref
rs1899952_A	0.00458	1	Ref
rs9543737_A	0.00231	1	Ref
rs3911241_C	0.00208	1	Ref
rs10052188_T	0.00969	1	Ref
rs61001950_T	0.02453	1	Ref
rs13111482_G	0.01119	1	Ref
rs28465174_A	0.00065	1	Ref
rs80118269_C	0.01111	1	Ref
rs1147610_G	0.03518	1	Ref
rs17044095_T	0.00195	1	Ref
rs72775230_C	0.00245	1	Ref
rs72981931_C	0.01287	1	Ref
rs10197165_C	0.00258	1	Ref
rs68020476_T	0.00413	1	Ref
rs11592436_C	0.02383	1	Ref
rs6451666_C	0.00574	1	Ref
rs4885216_A	0.00228	1	Ref
rs2042064_C	0.0026	1	Ref
rs6930445_G	0.00258	1	Ref
rs11012428_C	0.00103	1	Ref
rs6919575_G	0.00306	1	Ref
rs2406125_G	0.00189	1	Ref
rs3132578_A	0.00417	1	Ref
rs112592594_C	0.00029	1	Ref
rs9694545_G	0.00173	1	Ref
rs9667666_G	0.01406	1	Ref
rs28750730_A	0.01292	1	Ref
rs60859843_G	0.00384	1	Ref
rs74722200_C	0.00053	1	Ref
rs10448155_T	0.01082	1	Ref
rs9987655_C	0.00154	1	Ref
rs7122295_G	0.00195	1	Ref
rs9311055_A	0.00545	1	Ref
rs6824013_A	0.0018	1	Ref
rs11012451_T	0.01332	1	Ref
rs9829035_C	0.01948	1	Ref
rs1430128_G	0.01241	1	Ref
rs2394856_G	0.00163	1	Ref
rs1176954_G	0.00085	1	Ref
rs11240299_G	0.00234	1	Ref
rs9361152_C	0.00435	1	Ref
rs11737353_G	0.00066	1	Ref
rs7905651_T	0.00202	1	Ref
rs674850_A	0.00072	1	Ref
rs1017555_C	0.00336	1	Ref
rs12716908_T	0.00527	1	Ref
rs2271807_A	0.01691	1	Ref
rs79277052_T	0.00395	1	Ref
rs76350209_G	0.0016	1	Ref
rs34740455_C	0.01378	1	Ref
rs766454_T	0.01032	1	Ref
rs67539677_G	0.00123	1	Ref
rs113991468_G	0.00032	1	Ref
rs2327166_C	0.00095	1	Ref
rs839155_C	0.00332	1	Ref
rs112069784_G	0.00166	1	Ref
rs28623722_A	0.01124	1	Ref
rs79010858_C	0.00427	1	Ref
rs6553853_C	0.01294	1	Ref
rs12505591_G	0.00071	1	Ref
rs13094534_G	0.0014	1	Ref
rs839102_G	0.00446	1	Ref
rs12590189_A	0.00721	1	Ref
rs73367820_A	0.00477	1	Ref
rs17061074_A	0.01604	1	Ref
rs11159839_A	0.00697	1	Ref
rs61793233_C	0.00058	1	Ref
rs10455066_T	0.00044	1	Ref
rs6706785_G	0.01629	1	Ref
rs2532920_C	0.00026	1	Ref
rs13075790_C	0.002	1	Ref
rs357127_C	0.001	1	Ref
rs6799217_G	0.00377	1	Ref
rs13434948_C	0.00819	1	Ref
rs9929066_G	0.00478	1	Ref
rs35946663_G	0.0002	1	Ref
rs60375467_C	0.00137	1	Ref
rs165491_G	0.00036	1	Ref
rs9677482_G	0.00044	1	Ref
rs1325504_A	0.00203	1	Ref
rs13435545_T	0.0024	1	Ref
rs11012464_A	0.00214	1	Ref
rs8011324_G	0.02106	1	Ref
rs28506478_C	0.0045	1	Ref
rs642579_C	0.00069	1	Ref
rs1367194_C	0.00116	1	Ref
rs17660975_C	0.00405	1	Ref
rs56264320_G	0.00191	1	Ref
rs6878790_C	0.00145	1	Ref
rs11593437_A	0.00967	1	Ref
rs1264311_G	0.0004	1	Ref
rs6845499_G	0.00224	1	Ref
rs17002829_C	0.01788	1	Ref
rs6542624_G	0.01225	1	Ref
rs6860557_T	0.0003	1	Ref
rs1176869_C	0.00383	1	Ref
rs2105333_T	0.00078	1	Ref
rs6455563_G	0.03407	1	Ref
rs6572045_T	0.0077	1	Ref
rs145621384_C	0.00158	1	Ref
rs10041776_C	0.00552	1	Ref
rs59023685_C	0.00214	1	Ref
rs1410164_C	0.00582	1	Ref
rs7146166_T	0.00049	1	Ref
rs7689226_T	0.00758	1	Ref
rs1421668_C	0.00341	1	Ref
rs117694341_T	0.00885	1	Ref
rs2532930_G	0.00069	1	Ref
rs6893854_A	0.00082	1	Ref
rs77508548_C	0.00672	1	Ref
rs2225148_A	0.01427	1	Ref
rs6954756_C	0.00451	1	Ref
rs12906690_C	0.00943	1	Ref
rs6784860_C	0.00573	1	Ref
rs7735821_A	0.0048	1	Ref
rs7566184_G	0.00817	1	Ref
rs10216955_G	0.01084	1	Ref
rs6910554_A	0.01257	1	Ref
rs28714116_T	0.00223	1	Ref
rs13135422_G	0.00832	1	Ref
rs17044108_G	0.01465	1	Ref
rs6996833_T	0.00813	1	Ref
rs13408414_C	0.0052	1	Ref
rs9542697_A	0.02868	1	Ref
rs10100750_C	0.00067	1	Ref
rs9564826_T	0.01333	1	Ref
rs74718228_T	0.00929	1	Ref
rs7641737_A	0.00373	1	Ref
rs2892584_T	0.01941	1	Ref
rs10105287_G	0.00698	1	Ref
rs4660595_T	0.00809	1	Ref
rs6470963_C	0.00903	1	Ref
rs4709191_A	0.00046	1	Ref
rs1451953_T	0.01217	1	Ref
rs13083244_C	0.00396	1	Ref
rs28609175_C	0.00075	1	Ref
rs6455575_A	0.00128	1	Ref
rs10738253_C	0.00222	1	Ref
rs62108847_G	0.00034	1	Ref
rs6997730_G	0.00531	1	Ref
rs2676727_A	0.00213	1	Ref
rs13121334_G	0.003	1	Ref
rs28366140_C	0.0018	1	Ref
rs11598774_C	0.00323	1	Ref
rs13135042_A	0.00768	1	Ref
rs35822653_C	0.01222	1	Ref
rs62180943_G	0.00055	1	Ref
rs72775275_A	0.00084	1	Ref
rs12658276_A	0.00547	1	Ref
rs6593427_A	0.00417	1	Ref
rs28685575_G	0.00111	1	Ref
rs7719885_A	0.00895	1	Ref
rs638734_G	0.0012	1	Ref
rs59060130_G	0.0185	1	Ref
rs10856991_C	0.00432	1	Ref
rs7801223_C	0.00178	1	Ref
rs187805_C	0.0013	1	Ref
rs9921827_T	0.00865	1	Ref
rs7898090_G	0.00726	1	Ref
rs10803349_T	0.01343	1	Ref
rs12878664_G	0.01001	1	Ref
rs13035160_G	0.00132	1	Ref
rs6470958_G	0.00061	1	Ref
rs72652984_C	0.00258	1	Ref
rs12348979_A	0.00074	1	Ref
rs10752140_T	0.00276	1	Ref
rs7992487_T	0.02324	1	Ref
rs7673642_C	0.01342	1	Ref
rs10477835_T	0.00439	1	Ref
rs7009805_A	0.00067	1	Ref
rs256938_A	0.00552	1	Ref
rs1553559_T	0.00218	1	Ref
rs28485560_T	0.01079	1	Ref
rs33913544_C	0.00278	1	Ref
rs1628799_G	0.00284	1	Ref
rs12943640_G	0.01313	1	Ref
rs6891820_A	0.0011	1	Ref
rs60129174_C	0.00385	1	Ref
rs7145360_G	0.00501	1	Ref
rs1264345_G	0.00169	1	Ref
rs28719609_T	0.0025	1	Ref
rs3755901_T	0.00474	1	Ref
rs1264299_C	0.00037	1	Ref
rs4859894_C	0.00041	1	Ref
rs11935933_G	0.00161	1	Ref
rs11107420_A	0.00337	1	Ref
rs72795036_C	0.00492	1	Ref
rs1852808_C	0.01244	1	Ref
rs6553855_A	0.00915	1	Ref
rs13383006_C	0.00501	1	Ref
rs2395485_T	0.00646	1	Ref
rs149976351_C	0.01921	1	Ref
rs9323037_T	0.00321	1	Ref
rs11731374_C	0.00276	1	Ref
rs72795078_C	0.00139	1	Ref
rs76334132_G	0.00395	1	Ref
rs6846167_A	0.00353	1	Ref
rs13085667_A	0.00103	1	Ref
rs72775285_C	0.00424	1	Ref
rs1493421_C	0.01084	1	Ref
rs12642898_G	0.00281	1	Ref
rs6574363_C	0.00057	1	Ref
rs6850590_T	0.00085	1	Ref
rs839157_A	0.01506	1	Ref
rs3129990_T	0.00046	1	Ref
rs62039978_A	0.00162	1	Ref
rs13435336_T	0.01698	1	Ref
rs35739470_T	0.0005	1	Ref
rs844432_C	0.00201	1	Ref
rs4709175_T	0.00572	1	Ref
rs6858729_A	0.00172	1	Ref
rs73681704_C	0.00484	1	Ref
rs6455573_G	0.00366	1	Ref
rs1264307_G	0.00691	1	Ref
rs151023856_C	0.00084	1	Ref
rs12920477_C	0.00361	1	Ref
rs1476700_G	0.00055	1	Ref
rs12219100_T	0.00804	1	Ref
rs72652998_G	0.0067	1	Ref
rs3759639_C	0.00059	1	Ref
rs1451961_T	0.00151	1	Ref
rs6451656_C	0.0028	1	Ref
rs10756294_A	0.00548	1	Ref
rs6926306_T	0.00053	1	Ref
rs62553775_C	0.00177	1	Ref
rs10071791_T	0.00665	1	Ref
rs8021523_A	0.00299	1	Ref
rs6451664_T	0.00779	1	Ref
rs11159838_G	0.00108	1	Ref
rs13106889_T	0.00666	1	Ref
rs8059559_G	0.00085	1	Ref
rs2166186_G	0.01965	1	Ref
rs13083887_T	0.00165	1	Ref
rs10900428_T	0.00166	1	Ref
rs7857236_G	0.00601	1	Ref
rs16922088_C	0.00638	1	Ref
rs4740399_A	0.01044	1	Ref
rs58568383_T	0.01295	1	Ref
rs16872913_G	0.00107	1	Ref
rs78650210_T	0.00726	1	Ref
rs12002114_C	0.00553	1	Ref
rs11624387_G	0.00291	1	Ref
rs3796250_C	0.00779	1	Ref
rs13158494_T	0.00689	1	Ref
rs348139_C	0.00213	1	Ref
rs1926598_C	0.0265	1	Ref
rs4598356_A	0.00657	1	Ref
rs10173912_C	0.00318	1	Ref
rs4339621_T	0.01258	1	Ref
rs28545156_C	0.0018	1	Ref
rs141786511_C	0.00061	1	Ref
rs9343499_C	0.00023	1	Ref
rs2227902_G	0.00026	1	Ref
rs6451655_T	0.01053	1	Ref
rs1779586_C	0.01061	1	Ref
rs17805348_T	0.005	1	Ref
rs11012440_T	0.00054	1	Ref
rs11593423_C	0.00042	1	Ref
rs7642736_C	0.00063	1	Ref
rs72775259_A	0.0103	1	Ref
rs35850830_C	0.00026	1	Ref
rs7535305_C	0.01206	1	Ref
rs2844660_T	0.00255	1	Ref
rs62362443_A	0.00442	1	Ref
rs10806695_T	0.00115	1	Ref
rs56900310_T	0.00101	1	Ref
rs4738588_G	0.0013	1	Ref
rs16872880_C	0.00255	1	Ref
rs2276896_C	0.00213	1	Ref
rs114998182_G	0.00343	1	Ref
rs62439867_C	0.00031	1	Ref
rs55881014_G	0.00102	1	Ref
rs28366125_C	0.0073	1	Ref
rs9395502_G	0.00402	1	Ref
rs7725727_G	0.00811	1	Ref
rs556292_C	0.00297	1	Ref
rs10035851_C	0.00056	1	Ref
rs1409096_T	0.00421	1	Ref
rs1754409_T	0.00513	1	Ref
rs78317787_T	0.00031	1	Ref
rs7674055_T	0.00714	1	Ref
rs10828163_G	0.00318	1	Ref
rs2271806_C	0.00326	1	Ref
rs12343160_T	0.00735	1	Ref
rs2119702_T	0.00432	1	Ref
rs11130929_A	0.00363	1	Ref
rs79805226_C	0.0147	1	Ref
rs4599481_T	0.00176	1	Ref
rs17044092_T	0.00325	1	Ref
rs146189703_T	0.00379	1	Ref
rs112683937_G	0.00212	1	Ref
rs7192566_T	0.0024	1	Ref
rs3130649_A	0.00091	1	Ref
rs6562839_G	0.00565	1	Ref
rs7329608_A	0.0047	1	Ref
rs1949371_A	0.00523	1	Ref
rs73365837_T	0.00928	1	Ref
rs113015898_C	0.00432	1	Ref
rs34700358_C	0.00135	1	Ref
rs16872098_A	0.0032	1	Ref
rs28739524_C	0.00631	1	Ref
rs28437853_A	0.00144	1	Ref
rs827855_G	0.00047	1	Ref
rs6542648_A	0.00882	1	Ref
rs184793_C	0.00026	1	Ref
rs10792233_A	0.00265	1	Ref
rs11597961_T	0.00089	1	Ref
rs12187903_C	0.0007	1	Ref
rs4259983_C	0.0007	1	Ref
rs11012419_C	0.0031	1	Ref
rs10079000_C	0.00871	1	Ref
rs1514658_A	0.00339	1	Ref
rs67296470_A	0.00193	1	Ref
rs72795057_A	0.00491	1	Ref
rs9888972_C	0.00335	1	Ref
rs12650649_C	0.00527	1	Ref
rs7746246_C	0.00177	1	Ref
rs4688408_A	0.00319	1	Ref
rs78692157_G	0.01173	1	Ref
rs79395759_G	0.00158	1	Ref
rs11597734_G	0.00572	1	Ref
rs16892115_C	0.00188	1	Ref
rs6817305_A	0.0008	1	Ref
rs7562133_G	0.00139	1	Ref
rs11230348_T	0.00365	1	Ref
rs9694509_A	0.00674	1	Ref
rs77895457_T	0.0079	1	Ref
rs144841918_C	0.00064	1	Ref
rs950264_T	0.00261	1	Ref
rs72795051_C	0.00433	1	Ref
rs2443085_C	0.00354	1	Ref
rs4709189_A	0.00052	1	Ref
rs7781885_C	0.00597	1	Ref
rs7010674_A	0.00167	1	Ref
rs9347228_C	0.002	1	Ref
rs9542701_A	0.00123	1	Ref
rs3828713_C	0.00392	1	Ref
rs114513553_G	0.00042	1	Ref
rs2438352_A	0.00107	1	Ref
rs4951143_G	0.00049	1	Ref
rs9643366_T	0.00085	1	Ref
rs76471893_G	0.00027	1	Ref
rs4939392_T	0.00124	1	Ref
rs111248746_G	0.00666	1	Ref
rs144393450_C	0.00037	1	Ref
rs309908_G	0.00159	1	Ref
rs7564310_G	0.00677	1	Ref
rs57221952_C	0.00046	1	Ref
rs827865_A	0.00384	1	Ref
rs4320234_T	0.00049	1	Ref
rs839103_T	0.00852	1	Ref
rs571918_T	0.00087	1	Ref
rs12357853_G	0.00366	1	Ref
rs13067585_T	0.0074	1	Ref
rs72472139_A	0.00058	1	Ref
rs73912712_A	0.00091	1	Ref
rs28394479_C	0.00092	1	Ref
rs76060784_G	0.00064	1	Ref
rs74591812_A	0.00572	1	Ref
rs10170886_G	0.00106	1	Ref
rs10071115_C	0.00806	1	Ref
rs1395058_G	0.00778	1	Ref
rs10897085_T	0.00257	1	Ref
rs114317986_C	0.00035	1	Ref
rs11627143_C	0.00035	1	Ref
rs11900941_C	0.00166	1	Ref
rs80145646_C	0.00493	1	Ref
rs11096530_G	0.00267	1	Ref
rs7821671_C	0.00074	1	Ref
rs12886183_C	0.00642	1	Ref
rs4792127_A	0.00644	1	Ref
rs12657123_T	0.0022	1	Ref
rs10809617_T	0.00154	1	Ref
rs12405099_C	0.00223	1	Ref
rs1493415_G	0.00056	1	Ref
rs7636814_G	0.00192	1	Ref
rs115122924_G	0.00729	1	Ref
rs2676728_G	0.0027	1	Ref
rs34713644_G	0.00558	1	Ref
rs2158216_T	0.00154	1	Ref
rs7813573_C	0.01019	1	Ref
rs2535337_A	0.00816	1	Ref
rs2535325_C	0.00088	1	Ref
rs7439157_G	0.00227	1	Ref
rs12643573_A	0.0044	1	Ref
rs115789286_C	0.00197	1	Ref
rs1547816_T	0.00093	1	Ref
rs687557_T	0.00377	1	Ref
rs36116693_T	0.00205	1	Ref
rs6916144_T	0.01044	1	Ref
rs62108782_G	0.01595	1	Ref
rs2175971_G	0.00122	1	Ref
rs28720993_G	0.00375	1	Ref
rs10151544_T	0.00197	1	Ref
rs11941013_T	0.00162	1	Ref
rs12885158_C	0.00171	1	Ref
rs77379234_C	0.00249	1	Ref
rs34110030_G	0.00033	1	Ref
rs2137641_A	0.00293	1	Ref
rs28632195_T	0.00077	1	Ref
rs4859881_A	0.00274	1	Ref
rs2018142_C	0.00202	1	Ref
rs6886503_C	0.00091	1	Ref
rs935852_G	0.00244	1	Ref
rs9994167_A	0.0017	1	Ref
rs9466431_G	0.00474	1	Ref
rs12102728_C	0.00229	1	Ref
rs56832078_C	0.00037	1	Ref
rs10803351_G	0.00311	1	Ref
rs112778059_C	0.00119	1	Ref
rs2465144_G	0.0008	1	Ref
rs561079_T	0.00433	1	Ref
rs11012437_C	0.00121	1	Ref
rs12661295_A	0.00045	1	Ref
rs9262289_T	0.00401	1	Ref
rs2844655_G	0.00049	1	Ref
rs28544078_G	0.00051	1	Ref
rs57147104_A	0.00493	1	Ref
rs74836997_T	0.00262	1	Ref
rs149553113_C	0.00186	1	Ref
rs10052644_C	0.00389	1	Ref
rs7673980_C	0.00148	1	Ref
rs150633728_G	0.00118	1	Ref
rs12716944_C	0.00306	1	Ref
rs10148207_A	0.00432	1	Ref
rs6802120_C	0.00268	1	Ref
rs10038493_G	0.00068	1	Ref
rs6789584_C	0.00028	1	Ref
rs73235923_C	0.00117	1	Ref
rs13095658_A	0.00161	1	Ref
rs1572169_T	0.00333	1	Ref
rs3132575_G	0.00162	1	Ref
rs28611177_G	0.00464	1	Ref
rs9361154_T	0.00346	1	Ref
rs34232451_C	0.00047	1	Ref
rs9369905_C	0.00051	1	Ref
rs35869887_G	0.00143	1	Ref
rs12372613_A	0.00187	1	Ref
rs8019099_C	0.00057	1	Ref
rs72775231_G	0.00192	1	Ref
rs7141184_C	0.00196	1	Ref
rs2517582_C	0.00019	1	Ref
rs6821191_G	0.00064	1	Ref
rs80311203_G	0.00065	1	Ref
rs11715745_C	0.00112	1	Ref
rs2043005_C	0.0016	1	Ref
rs12339568_T	0.00117	1	Ref
rs4332111_G	0.00209	1	Ref
rs57896992_T	0.00076	1	Ref
rs17156671_A	0.00439	1	Ref
rs11931007_T	0.00033	1	Ref
rs17044110_C	0.00351	1	Ref
rs11738197_A	0.00313	1	Ref
rs6542647_C	0.00046	1	Ref
rs2069331_A	0.00234	1	Ref
rs7621881_C	0.00053	1	Ref
rs952183_C	0.00747	1	Ref
rs10064210_G	0.00391	1	Ref
rs137974539_T	0.00117	1	Ref
rs12331312_T	0.00364	1	Ref
rs1489694_A	0.00079	1	Ref
rs7185658_A	0.00045	1	Ref
rs6848658_G	0.00049	1	Ref
rs6538022_C	0.00199	1	Ref
rs56138517_A	0.0006	1	Ref
rs6933253_G	0.0006	1	Ref
rs8003493_G	0.00063	1	Ref
rs7578973_G	0.00312	1	Ref
rs10020098_C	0.00116	1	Ref
rs10736422_C	0.00067	1	Ref
rs7956812_G	0.0042	1	Ref
rs62108840_A	0.00272	1	Ref
rs6960464_A	0.00172	1	Ref
rs11994487_T	0.00037	1	Ref
rs9848831_G	0.00042	1	Ref
rs13384087_C	0.00359	1	Ref
rs9572745_G	0.00049	1	Ref
rs112014751_C	0.00157	1	Ref
rs9361157_T	0.00108	1	Ref
rs6596578_A	0.00277	1	Ref
rs11012433_G	0.00069	1	Ref
rs705930_T	0.00071	1	Ref
rs791773_G	0.00125	1	Ref
rs73912715_C	0.00072	1	Ref
rs200913095_T	0.00238	1	Ref
rs55734441_G	0.00133	1	Ref
rs1832872_G	0.00136	1	Ref
rs6898323_G	0.00083	1	Ref
rs6470954_C	0.00521	1	Ref
rs1489696_T	0.00197	1	Ref
rs1264342_C	0.00093	1	Ref
rs34264360_T	0.00586	1	Ref
rs10936976_T	0.00044	1	Ref
rs6538026_T	0.00596	1	Ref
rs36157464_G	0.00048	1	Ref
rs11722195_T	0.00111	1	Ref
rs12102293_T	0.00169	1	Ref
rs7683979_G	0.00283	1	Ref
rs75593714_G	0.00117	1	Ref
rs200185252_A	0.00175	1	Ref
rs12640583_G	0.00069	1	Ref
rs62108788_G	0.00126	1	Ref
rs10138748_C	0.00524	1	Ref
rs112116223_T	0.00475	1	Ref
rs181298223_C	0.00077	1	Ref
rs1948448_A	0.00077	1	Ref
rs9364954_G	0.00307	1	Ref
rs13400849_C	0.00079	1	Ref
rs6796386_C	0.00081	1	Ref
rs10477834_A	0.00084	1	Ref
rs10169305_G	0.00027	1	Ref
rs6980863_G	0.00435	1	Ref
rs7840862_T	0.0015	1	Ref
rs9456293_A	0.0039	1	Ref
rs60540762_C	0.0004	1	Ref
rs34054994_G	0.00101	1	Ref
rs2406121_G	0.00162	1	Ref
rs6836627_T	0.00046	1	Ref
rs62108777_C	0.00047	1	Ref
rs7607140_G	0.00405	1	Ref
rs1052414_G	0.00169	1	Ref
rs12898796_T	0.00238	1	Ref
rs6470952_T	0.00185	1	Ref
rs1462473_A	0.00065	1	Ref
rs73485259_A	0.00371	1	Ref
rs6951180_G	0.00129	1	Ref
rs10140383_G	0.0007	1	Ref
rs139127946_G	0.00314	1	Ref
rs9543736_T	0.00074	1	Ref
rs3892630_C	0.00264	1	Ref
rs10060837_C	0.0002	1	Ref
rs10803350_T	0.00331	1	Ref
rs140663215_C	0.00086	1	Ref
rs73912716_T	0.00704	1	Ref
rs12042133_C	0.00768	1	Ref
rs11012422_G	0.0009	1	Ref
rs72691107_T	0.0009	1	Ref
rs11755054_A	0.00099	1	Ref
rs10059898_G	0.01197	1	Ref
rs76964124_G	0.00244	1	Ref
rs1530697_G	0.00319	1	Ref
rs55694923_T	0.00061	1	Ref
rs116504242_C	0.00063	1	Ref
rs80066683_A	0.00523	1	Ref
rs56962140_T	0.0007	1	Ref
rs209799_A	0.00274	1	Ref
rs116884586_G	0.00086	1	Ref
rs72472136_T	0.00089	1	Ref
rs7546128_C	0.00089	1	Ref
rs2535330_C	0.00023	1	Ref
rs12895038_G	0.01764	1	Ref
rs10057459_G	0.00091	1	Ref
rs10143161_G	0.00292	1	Ref
rs4905480_A	0.00095	1	Ref
rs2709465_C	0.00029	1	Ref
rs10141995_C	0.00032	1	Ref
rs2844664_C	0.00035	1	Ref
rs34785398_G	0.00307	1	Ref
rs12335806_A	0.00172	1	Ref
rs57191304_G	0.00172	1	Ref
rs58167117_A	0.00105	1	Ref
rs2243739_T	0.00178	1	Ref
rs79569625_C	0.01342	1	Ref
rs10756296_G	0.00044	1	Ref
rs3845574_C	0.00113	1	Ref
rs13357786_G	0.00046	1	Ref
rs11816709_G	0.00116	1	Ref
rs10175615_G	0.00121	1	Ref
rs72775272_A	0.00195	1	Ref
rs12321716_C	0.00266	1	Ref
rs34530338_G	0.00197	1	Ref
rs78108816_C	0.00058	1	Ref
rs601019_T	0.00061	1	Ref
rs17407137_C	0.00763	1	Ref
rs7698246_G	0.00203	1	Ref
rs10253830_G	0.00344	1	Ref
rs55771104_T	0.00136	1	Ref
rs6602317_T	0.00137	1	Ref
rs6954471_C	0.00429	1	Ref
rs1022286_G	0.00078	1	Ref
rs7914197_A	0.00438	1	Ref
rs60597763_G	0.00082	1	Ref
rs6777674_G	0.0009	1	Ref
rs13088547_C	0.00456	1	Ref
rs1959131_T	0.00176	1	Ref
rs72691109_C	0.0003	1	Ref
rs4859515_T	0.00108	1	Ref
rs2471569_A	0.00111	1	Ref
rs1493408_C	0.00112	1	Ref
rs11065484_G	0.00043	1	Ref
rs113257011_C	0.00118	1	Ref
rs12911382_G	0.00118	1	Ref
rs9364956_A	0.00194	1	Ref
rs57417127_A	0.00049	1	Ref
rs74534178_A	0.00125	1	Ref
rs59643894_C	0.0005	1	Ref
rs13145902_C	0.00581	1	Ref
rs649254_T	0.00129	1	Ref
rs11130932_G	0.0013	1	Ref
rs11779086_G	0.00056	1	Ref
rs11065495_C	0.00057	1	Ref
rs7914249_T	0.00058	1	Ref
rs12632827_C	0.00745	1	Ref
rs17002825_T	0.0006	1	Ref
rs1516912_G	0.00221	1	Ref
rs2596541_C	0.00072	1	Ref
rs61957777_G	0.00234	1	Ref
rs547737032_C	0.00089	1	Ref
rs75700221_G	0.00176	1	Ref
rs77816870_G	0.00017	1	Ref
rs12110284_C	0.00029	1	Ref
rs6742017_G	0.00112	1	Ref
rs72820285_C	0.00194	1	Ref
rs2027514_C	0.00034	1	Ref
rs6455572_A	0.00124	1	Ref
rs12072230_T	0.00374	1	Ref
rs9543731_G	0.00046	1	Ref
rs59332094_T	0.00047	1	Ref
rs62120868_G	0.00048	1	Ref
rs7332575_G	0.00049	1	Ref
rs11593591_G	0.00133	1	Ref
rs4674196_A	0.0014	1	Ref
rs6784143_C	0.00061	1	Ref
rs7308710_C	0.00146	1	Ref
rs4709188_T	0.00065	1	Ref
rs6774410_A	0.0015	1	Ref
rs4660211_T	0.0007	1	Ref
rs16922086_T	0.00071	1	Ref
rs7973943_G	0.00246	1	Ref
rs1447807_A	0.00078	1	Ref
rs12674799_T	0.0008	1	Ref
rs1502874_A	0.00081	1	Ref
rs9364952_G	0.00086	1	Ref
rs4951144_T	0.00175	1	Ref
rs8033246_G	0.00091	1	Ref
rs930467_G	0.00449	1	Ref
rs4950971_G	0.00102	1	Ref
rs11738191_A	0.01082	1	Ref
rs146404595_G	0.00021	1	Ref
rs55933602_C	0.00113	1	Ref
rs3860617_G	0.00027	1	Ref
rs146287839_C	0.00118	1	Ref
rs56410614_C	0.00034	1	Ref
rs169716_G	0.00035	1	Ref
rs9913953_A	0.0058	1	Ref
rs2403284_C	0.00399	1	Ref
rs11103912_T	0.00128	1	Ref
rs10828164_A	0.00044	1	Ref
rs34242559_T	0.00046	1	Ref
rs10467412_A	0.00049	1	Ref
rs56157163_G	0.00051	1	Ref
rs10190731_C	0.00246	1	Ref
rs10034395_G	0.0006	1	Ref
rs1839219_T	0.00061	1	Ref
rs13131841_C	0.00156	1	Ref
rs2374646_C	0.00063	1	Ref
rs6442368_C	0.00255	1	Ref
rs73242625_A	0.00067	1	Ref
rs9296224_G	0.0007	1	Ref
rs3095352_C	0.00165	1	Ref
rs8012241_C	0.00356	1	Ref
rs6799148_C	0.00076	1	Ref
rs4425849_A	0.00268	1	Ref
rs12353026_G	0.0008	1	Ref
rs9349041_G	0.0008	1	Ref
rs828009_G	0.0009	1	Ref
rs28600753_A	0.00094	1	Ref
rs72472137_G	0.00098	1	Ref
rs57829000_C	0.00293	1	Ref
rs9352400_A	0.00497	1	Ref
rs80301981_T	0.00598	1	Ref
rs13061579_C	0.00107	1	Ref
rs10072579_C	0.00108	1	Ref
rs7688422_G	0.00209	1	Ref
rs78122893_C	0.00804	1	Ref
rs9819997_A	0.00132	1	Ref
rs56917209_C	0.00133	1	Ref
rs35449958_A	0.00033	1	Ref
rs12591598_C	0.00039	1	Ref
rs55983965_T	0.00144	1	Ref
rs2406116_A	0.00248	1	Ref
rs863394_A	0.00043	1	Ref
rs8092183_C	0.00148	1	Ref
rs1899588_A	0.00046	1	Ref
rs827863_T	0.00151	1	Ref
rs2240804_G	0.00255	1	Ref
rs2165567_A	0.00049	1	Ref
rs828010_T	0.00053	1	Ref
rs827854_A	0.00054	1	Ref
rs4708787_G	0.00055	1	Ref
rs2406126_C	0.00056	1	Ref
rs9381793_G	0.00056	1	Ref
rs3130657_T	0.00057	1	Ref
rs141493176_G	0.00058	1	Ref
rs12187898_C	0.00373	1	Ref
rs13435039_G	0.00269	1	Ref
rs57368116_A	0.00482	1	Ref
rs73235919_G	0.00168	1	Ref
rs55960888_A	0.00176	1	Ref
rs639559_C	0.0007	1	Ref
rs2244356_G	0.00072	1	Ref
rs140411637_C	0.00075	1	Ref
rs3130650_G	0.00184	1	Ref
rs12572135_C	0.00081	1	Ref
rs185716590_A	0.0019	1	Ref
rs13389472_T	0.00198	1	Ref
rs66523805_G	0.0009	1	Ref
rs1931454_C	0.00096	1	Ref
rs10073505_G	0.00099	1	Ref
rs2032792_G	0.00324	1	Ref
rs13164188_T	0.00105	1	Ref
rs117022093_C	0.00217	1	Ref
rs4551458_C	0.00225	1	Ref
rs59966846_G	0.00228	1	Ref
rs12050084_C	0.00233	1	Ref
rs1327727_C	0.00346	1	Ref
rs60342811_C	0.00694	1	Ref
rs10930712_G	0.00245	1	Ref
rs35326835_T	0.00135	1	Ref
rs6754367_T	0.00137	1	Ref
rs201960413_T	0.00026	1	Ref
rs57945649_T	0.00145	1	Ref
rs2813385_C	0.0003	1	Ref
rs1977897_G	0.00033	1	Ref
rs72653000_C	0.00033	1	Ref
rs4950970_G	0.00038	1	Ref
rs72659023_G	0.00046	1	Ref
rs11160332_A	0.00164	1	Ref
rs1363105_C	0.0005	1	Ref
rs839105_C	0.00051	1	Ref
rs79018653_C	0.00056	1	Ref
rs7765579_G	0.00181	1	Ref
rs11779068_C	0.00061	1	Ref
rs113920486_C	0.00063	1	Ref
rs4740400_G	0.00064	1	Ref
rs28376086_C	0.00065	1	Ref
rs113297581_G	0.00072	1	Ref
rs6793390_T	0.00075	1	Ref
rs2432096_T	0.00078	1	Ref
rs16872890_C	0.00338	1	Ref
rs76979575_C	0.00215	1	Ref
rs3095349_A	0.00095	1	Ref
rs7493574_T	0.00108	1	Ref
rs77619007_T	0.00113	1	Ref
rs1154140_G	0.00377	1	Ref
rs75169626_G	0.00129	1	Ref
rs13302881_C	0.01188	1	Ref
rs6980975_G	0.01066	1	Ref
rs515910_A	0.00673	1	Ref
rs56957745_A	0.00145	1	Ref
rs12711961_A	0.00415	1	Ref
rs28370990_C	0.00418	1	Ref
rs2134459_G	0.00155	1	Ref
rs2471561_A	0.00557	1	Ref
rs2844522_G	0.00024	1	Ref
rs201640821_C	0.00025	1	Ref
rs11196687_G	0.00026	1	Ref
rs10756293_C	0.00027	1	Ref
rs11240304_C	0.00028	1	Ref
rs34970193_C	0.00168	1	Ref
rs6665995_A	0.00033	1	Ref
rs1371475_A	0.00034	1	Ref
rs2165257_A	0.00035	1	Ref
rs10167048_T	0.00037	1	Ref
rs6858989_C	0.00037	1	Ref
rs9346753_G	0.0004	1	Ref
rs74215245_G	0.0059	1	Ref
rs6533376_G	0.00043	1	Ref
rs62118544_C	0.00044	1	Ref
rs6455581_G	0.00045	1	Ref
rs77279528_A	0.00184	1	Ref
rs7656319_T	0.00048	1	Ref
rs16888155_T	0.00049	1	Ref
rs76616305_G	0.00051	1	Ref
rs150644979_C	0.00053	1	Ref
rs1245314_A	0.0061	1	Ref
rs186322_A	0.00057	1	Ref
rs3759601_G	0.00059	1	Ref
rs72775261_T	0.00059	1	Ref
rs6758103_G	0.0006	1	Ref
rs9530360_G	0.00063	1	Ref
rs12175251_A	0.00205	1	Ref
rs6728515_G	0.00205	1	Ref
rs7768945_T	0.00069	1	Ref
rs10216561_T	0.00076	1	Ref
rs3824398_G	0.00083	1	Ref
rs10064425_T	0.00373	1	Ref
rs1572202_G	0.00086	1	Ref
rs3130795_C	0.00089	1	Ref
rs2709467_C	0.00093	1	Ref
rs6869034_G	0.0024	1	Ref
rs2517573_T	0.00097	1	Ref
rs12438959_G	0.00107	1	Ref
rs4672841_T	0.00107	1	Ref
rs145554819_G	0.00108	1	Ref
rs8062866_G	0.00111	1	Ref
rs2032790_C	0.0026	1	Ref
rs76731656_G	0.00262	1	Ref
rs17136841_A	0.00116	1	Ref
rs60196651_G	0.00121	1	Ref
rs17165631_C	0.00139	1	Ref
rs60677252_T	0.00757	1	Ref
rs36166667_C	0.00299	1	Ref
rs4899940_A	0.00306	1	Ref
rs13410276_A	0.00152	1	Ref
rs73827443_T	0.0047	1	Ref
rs2676706_C	0.00161	1	Ref
rs4904417_A	0.00331	1	Ref
rs72652997_C	0.0002	1	Ref
rs1754412_T	0.00023	1	Ref
rs10107046_C	0.00025	1	Ref
rs9929059_G	0.00025	1	Ref
rs4852086_C	0.00027	1	Ref
rs827853_T	0.00027	1	Ref
rs11593585_G	0.00028	1	Ref
rs58218398_G	0.00028	1	Ref
rs57472807_T	0.00029	1	Ref
rs59201809_G	0.0003	1	Ref
rs72652975_C	0.0003	1	Ref
rs2866810_G	0.00032	1	Ref
rs10745408_C	0.00033	1	Ref
rs3750821_C	0.00033	1	Ref
rs12002165_G	0.00035	1	Ref
rs12651813_G	0.00199	1	Ref
rs9262291_T	0.00036	1	Ref
rs1891354_G	0.00037	1	Ref
rs13382273_G	0.00038	1	Ref
rs1395060_C	0.00204	1	Ref
rs1813334_C	0.00042	1	Ref
rs7657658_C	0.00044	1	Ref
rs3131031_G	0.00046	1	Ref
rs4503614_G	0.00046	1	Ref
rs196347_G	0.00047	1	Ref
rs4266632_A	0.00543	1	Ref
rs3095346_C	0.00048	1	Ref
rs77777898_T	0.00049	1	Ref
rs2057019_C	0.00051	1	Ref
rs13085824_T	0.00052	1	Ref
rs17389728_C	0.00053	1	Ref
rs2320536_C	0.00054	1	Ref
rs839163_T	0.00056	1	Ref
rs2523459_T	0.00068	1	Ref
rs9355243_A	0.00068	1	Ref
rs11816084_C	0.00069	1	Ref
rs8019631_G	0.02274	1	Ref
rs12047221_G	0.0007	1	Ref
rs7095293_A	0.0007	1	Ref
rs7557773_C	0.0007	1	Ref
rs9870274_G	0.0007	1	Ref
rs4588836_G	0.00072	1	Ref
rs10129178_C	0.00079	1	Ref
rs28757743_G	0.0008	1	Ref
rs11592569_C	0.00081	1	Ref
rs12147567_G	0.00085	1	Ref
rs6470967_C	0.00086	1	Ref
rs2471563_C	0.0009	1	Ref
rs972726_A	0.00266	1	Ref
rs55884872_C	0.00093	1	Ref
rs71402282_C	0.00095	1	Ref
rs75862770_G	0.00096	1	Ref
rs9940095_A	0.001	1	Ref
rs9262294_C	0.00102	1	Ref
rs12653864_A	0.00109	1	Ref
rs1363103_T	0.00109	1	Ref
rs41428644_T	0.00111	1	Ref
rs67035778_T	0.00111	1	Ref
rs584309_A	0.00112	1	Ref
rs686441_C	0.00121	1	Ref
rs11627296_C	0.00122	1	Ref
rs2122029_A	0.00308	1	Ref
rs77021098_A	0.00127	1	Ref
rs839158_T	0.00129	1	Ref
rs144707825_C	0.00134	1	Ref
rs6698877_T	0.00139	1	Ref
rs309946_A	0.0014	1	Ref
rs677904_G	0.00512	1	Ref
rs7772280_A	0.00144	1	Ref
rs75532680_C	0.0034	1	Ref
rs141964789_G	0.00163	1	Ref
rs60905445_C	0.00374	1	Ref
rs7899845_T	0.00183	1	Ref
rs4708786_G	0.00189	1	Ref
rs1417185_C	0.0021	1	Ref
rs1890914_A	0.00416	1	Ref
rs583642_C	0.00021	1	Ref
rs11886179_C	0.00022	1	Ref
rs1493419_T	0.00022	1	Ref
rs1264315_C	0.00024	1	Ref
rs10749159_G	0.00025	1	Ref
rs6985947_C	0.00025	1	Ref
rs4863519_C	0.00026	1	Ref
rs1264327_G	0.00027	1	Ref
rs1410163_T	0.00029	1	Ref
rs827998_C	0.00031	1	Ref
rs2225820_C	0.00032	1	Ref
rs921541_C	0.00032	1	Ref
rs7341305_C	0.00237	1	Ref
rs7024392_C	0.00034	1	Ref
rs13406425_C	0.00443	1	Ref
rs11929843_A	0.00038	1	Ref
rs7586027_G	0.00039	1	Ref
rs117196562_A	0.0004	1	Ref
rs35150496_G	0.0004	1	Ref
rs60940020_C	0.00042	1	Ref
rs6455578_A	0.00042	1	Ref
rs13194647_A	0.00043	1	Ref
rs35512517_T	0.00043	1	Ref
rs3812100_T	0.00043	1	Ref
rs640046_G	0.00045	1	Ref
rs2345833_G	0.00252	1	Ref
rs1847215_T	0.00048	1	Ref
rs357123_C	0.00048	1	Ref
rs685229_A	0.00048	1	Ref
rs111789763_T	0.0026	1	Ref
rs11012447_A	0.00471	1	Ref
rs13118787_A	0.00057	1	Ref
rs61285555_G	0.00058	1	Ref
rs11902033_G	0.00059	1	Ref
rs17389770_C	0.00059	1	Ref
rs10008811_T	0.00062	1	Ref
rs72652957_C	0.00064	1	Ref
rs1983874_G	0.00065	1	Ref
rs2394451_T	0.00068	1	Ref
rs3131027_T	0.00071	1	Ref
rs6890021_A	0.00072	1	Ref
rs62362459_A	0.0029	1	Ref
rs10270704_A	0.02005	1	Ref
rs73235921_T	0.00079	1	Ref
rs9361156_T	0.00079	1	Ref
rs3094109_G	0.00083	1	Ref
rs1953242_G	0.00301	1	Ref
rs72652991_G	0.00085	1	Ref
rs113548876_G	0.00302	1	Ref
rs28490330_C	0.0009	1	Ref
rs62362009_C	0.00094	1	Ref
rs13096467_G	0.00314	1	Ref
rs9987656_C	0.00097	1	Ref
rs28875567_A	0.00102	1	Ref
rs9355650_G	0.0011	1	Ref
rs9364951_C	0.00111	1	Ref
rs9456291_G	0.00337	1	Ref
rs12618591_A	0.00126	1	Ref
rs3131066_A	0.00353	1	Ref
rs1039467_G	0.00145	1	Ref
rs2438368_G	0.00187	1	Ref
rs3130652_G	0.00439	1	Ref
rs8011217_A	0.00213	1	Ref
rs112259028_G	0.00227	1	Ref
rs12894714_G	0.00235	1	Ref
rs59395345_A	0.00252	1	Ref
rs348128_T	0.00517	1	Ref
rs865721_T	0.00259	1	Ref
rs705953_A	0.00261	1	Ref
rs3130792_T	0.00019	1	Ref
rs73042339_C	0.00019	1	Ref
rs146613330_C	0.00022	1	Ref
rs678292_G	0.00022	1	Ref
rs2844526_T	0.00024	1	Ref
rs28697180_C	0.00024	1	Ref
rs78091320_A	0.00024	1	Ref
rs58358199_A	0.00025	1	Ref
rs2532937_G	0.00026	1	Ref
rs6461997_T	0.00026	1	Ref
rs1891350_G	0.00027	1	Ref
rs10960498_T	0.00028	1	Ref
rs2532938_G	0.00028	1	Ref
rs56094696_A	0.00028	1	Ref
rs2853970_G	0.0003	1	Ref
rs3936974_A	0.0003	1	Ref
rs627502_A	0.0003	1	Ref
rs2676725_C	0.00031	1	Ref
rs80053394_C	0.00031	1	Ref
rs13129350_G	0.00033	1	Ref
rs2886564_G	0.00033	1	Ref
rs112189726_G	0.00034	1	Ref
rs4863699_T	0.00034	1	Ref
rs1264300_A	0.00035	1	Ref
rs1489695_G	0.00035	1	Ref
rs2108812_C	0.00035	1	Ref
rs6562841_C	0.00035	1	Ref
rs9262288_A	0.00035	1	Ref
rs1372361_C	0.00036	1	Ref
rs4709186_T	0.00036	1	Ref
rs13122457_G	0.00037	1	Ref
rs60608708_A	0.00037	1	Ref
rs9564825_A	0.00037	1	Ref
rs2152637_G	0.00039	1	Ref
rs1554457_G	0.0004	1	Ref
rs56036638_C	0.0004	1	Ref
rs10885543_G	0.00043	1	Ref
rs78333273_G	0.00043	1	Ref
rs9529895_C	0.00043	1	Ref
rs75836170_G	0.00044	1	Ref
rs13435138_C	0.00047	1	Ref
rs28796999_T	0.00047	1	Ref
rs7697219_G	0.00047	1	Ref
rs10211283_G	0.00051	1	Ref
rs1349124_A	0.00051	1	Ref
rs408523_C	0.00051	1	Ref
rs10133981_G	0.00052	1	Ref
rs2245387_C	0.00053	1	Ref
rs11012441_A	0.00055	1	Ref
rs4709185_T	0.00055	1	Ref
rs8098934_T	0.00056	1	Ref
rs72640706_C	0.00057	1	Ref
rs828005_T	0.00057	1	Ref
rs3860618_T	0.00058	1	Ref
rs664843_A	0.00058	1	Ref
rs6760035_G	0.00058	1	Ref
rs2415023_G	0.0006	1	Ref
rs11596551_G	0.00062	1	Ref
rs116394289_C	0.00063	1	Ref
rs2249459_C	0.00063	1	Ref
rs78942226_A	0.00063	1	Ref
rs11930954_T	0.00068	1	Ref
rs10064760_A	0.00352	1	Ref
rs10073929_A	0.0007	1	Ref
rs113948160_G	0.00071	1	Ref
rs4144361_A	0.00075	1	Ref
rs28514797_G	0.00076	1	Ref
rs72652956_A	0.00077	1	Ref
rs11012463_A	0.00087	1	Ref
rs10193134_T	0.00088	1	Ref
rs74465099_T	0.00088	1	Ref
rs10776953_G	0.00092	1	Ref
rs475963_A	0.00094	1	Ref
rs2200546_C	0.00387	1	Ref
rs61302035_A	0.00097	1	Ref
rs4708788_T	0.00099	1	Ref
rs57469282_A	0.001	1	Ref
rs4417999_G	0.00101	1	Ref
rs56409046_C	0.00103	1	Ref
rs11065496_G	0.00104	1	Ref
rs262824_T	0.00107	1	Ref
rs4299850_G	0.00108	1	Ref
rs13408288_C	0.0011	1	Ref
rs7840042_C	0.00114	1	Ref
rs11012427_A	0.00117	1	Ref
rs3130794_T	0.00117	1	Ref
rs13131896_G	0.00121	1	Ref
rs80217111_C	0.00127	1	Ref
rs1107897_A	0.0013	1	Ref
rs357130_A	0.00136	1	Ref
rs1973535_T	0.00149	1	Ref
rs1439828_G	0.00159	1	Ref
rs1502875_G	0.00166	1	Ref
rs11621703_G	0.0017	1	Ref
rs7019645_C	0.00184	1	Ref
rs1029580_A	0.00186	1	Ref
rs1015812_G	0.00188	1	Ref
rs112329502_G	0.00189	1	Ref
rs9991424_T	0.00189	1	Ref
rs2325630_T	0.00195	1	Ref
rs6815856_T	0.00212	1	Ref
rs9395501_G	0.00223	1	Ref
rs56755272_C	0.00257	1	Ref
rs961370_A	0.00265	1	Ref
rs10053371_A	0.00268	1	Ref
rs12405378_C	0.00632	1	Ref
rs569967_G	0.00345	1	Ref
rs7159378_G	0.00728	1	Ref
rs6575378_G	0.00019	1	Ref
rs76761018_G	0.0002	1	Ref
rs115416278_G	0.00021	1	Ref
rs4501834_G	0.00021	1	Ref
rs34564985_C	0.00022	1	Ref
rs827872_T	0.00022	1	Ref
rs4433000_C	0.00023	1	Ref
rs2517468_G	0.00024	1	Ref
rs9346752_T	0.00025	1	Ref
rs309906_G	0.00026	1	Ref
rs34065281_G	0.00026	1	Ref
rs74399945_C	0.00026	1	Ref
rs13404900_C	0.00027	1	Ref
rs17002828_G	0.00027	1	Ref
rs2096164_G	0.00027	1	Ref
rs2290345_C	0.00027	1	Ref
rs6981568_G	0.00027	1	Ref
rs12357784_C	0.00028	1	Ref
rs1531070_G	0.00028	1	Ref
rs28366131_C	0.00028	1	Ref
rs56895837_C	0.00028	1	Ref
rs10927672_A	0.00029	1	Ref
rs28366124_T	0.00029	1	Ref
rs112310437_C	0.0003	1	Ref
rs1477767_G	0.0003	1	Ref
rs1502879_G	0.0003	1	Ref
rs2252760_G	0.0003	1	Ref
rs4660585_G	0.0003	1	Ref
rs7097882_G	0.0003	1	Ref
rs2315073_C	0.00031	1	Ref
rs111256062_C	0.00032	1	Ref
rs13387442_C	0.00032	1	Ref
rs11721383_C	0.00033	1	Ref
rs12146332_C	0.00033	1	Ref
rs2317123_A	0.00034	1	Ref
rs59666483_C	0.00034	1	Ref
rs71563003_G	0.00034	1	Ref
rs192414812_G	0.00035	1	Ref
rs2428474_C	0.00035	1	Ref
rs584577_A	0.00035	1	Ref
rs72795028_C	0.00035	1	Ref
rs77907709_G	0.00035	1	Ref
rs6817742_T	0.00036	1	Ref
rs6827822_T	0.00037	1	Ref
rs28395434_G	0.00038	1	Ref
rs138604319_A	0.00039	1	Ref
rs6930405_C	0.00039	1	Ref
rs2389711_C	0.0004	1	Ref
rs7084757_C	0.0004	1	Ref
rs12041198_T	0.00042	1	Ref
rs1264332_G	0.00042	1	Ref
rs74095902_A	0.00043	1	Ref
rs8014682_T	0.00045	1	Ref
rs11595335_T	0.00046	1	Ref
rs58211692_G	0.00046	1	Ref
rs827868_T	0.00046	1	Ref
rs10859679_A	0.00047	1	Ref
rs57635268_T	0.00047	1	Ref
rs7783670_T	0.00048	1	Ref
rs9940186_A	0.00049	1	Ref
rs1948881_C	0.0005	1	Ref
rs3931299_C	0.00051	1	Ref
rs78642028_A	0.00051	1	Ref
rs13215471_T	0.00052	1	Ref
rs59779536_C	0.00052	1	Ref
rs76617938_G	0.00052	1	Ref
rs2532929_A	0.00053	1	Ref
rs7463033_G	0.00053	1	Ref
rs116072255_C	0.00054	1	Ref
rs6489796_T	0.00054	1	Ref
rs12343205_T	0.00055	1	Ref
rs3759602_T	0.00056	1	Ref
rs1017556_G	0.00057	1	Ref
rs17389938_G	0.0006	1	Ref
rs7922346_G	0.00063	1	Ref
rs10479298_G	0.00066	1	Ref
rs9586881_A	0.0049	1	Ref
rs2844702_G	0.00067	1	Ref
rs9564824_A	0.00069	1	Ref
rs624159_C	0.0007	1	Ref
rs839162_T	0.00496	1	Ref
rs10026915_C	0.00074	1	Ref
rs34684088_G	0.00075	1	Ref
rs6973893_T	0.00077	1	Ref
rs143523959_G	0.00079	1	Ref
rs74732357_C	0.00079	1	Ref
rs58561832_T	0.00081	1	Ref
rs9307375_C	0.00082	1	Ref
rs67345347_G	0.00513	1	Ref
rs61793212_T	0.00084	1	Ref
rs262819_A	0.00088	1	Ref
rs6429709_A	0.00088	1	Ref
rs28733207_C	0.00089	1	Ref
rs62260802_G	0.00089	1	Ref
rs4899939_G	0.0009	1	Ref
rs17105315_G	0.00095	1	Ref
rs7022513_C	0.00095	1	Ref
rs6533390_T	0.00097	1	Ref
rs7871560_T	0.001	1	Ref
rs12909503_T	0.00109	1	Ref
rs8013038_A	0.00109	1	Ref
rs34071927_G	0.00113	1	Ref
rs57269598_C	0.00115	1	Ref
rs10187271_A	0.00116	1	Ref
rs7963957_C	0.00128	1	Ref
rs112856277_C	0.00146	1	Ref
rs13083138_A	0.00147	1	Ref
rs827862_A	0.00148	1	Ref
rs56121699_G	0.00158	1	Ref
rs7993357_C	0.00179	1	Ref
rs1451962_A	0.00183	1	Ref
rs2317119_T	0.00183	1	Ref
rs55921407_C	0.00194	1	Ref
rs9600360_A	0.00207	1	Ref
rs1264317_C	0.00242	1	Ref
rs11098003_C	0.01279	1	Ref
rs11904437_A	0.00289	1	Ref
rs17485977_G	0.00295	1	Ref
rs117547718_C	0.00306	1	Ref
rs11852724_G	0.02553	1	Ref
rs6470957_G	0.00336	1	Ref
rs827857_C	0.00566	1	Ref
rs1441808_T	0.00582	1	Ref
rs13096384_G	0.00018	1	Ref
rs13177180_G	0.00018	1	Ref
rs1361452_C	0.00018	1	Ref
rs1889446_T	0.00018	1	Ref
rs8023915_G	0.00019	1	Ref
rs185652176_C	0.0002	1	Ref
rs35941406_G	0.00021	1	Ref
rs4610176_G	0.00021	1	Ref
rs73311328_T	0.00021	1	Ref
rs79191642_C	0.00021	1	Ref
rs887381_T	0.00021	1	Ref
rs9921666_T	0.00021	1	Ref
rs10008707_A	0.00022	1	Ref
rs6461999_C	0.00022	1	Ref
rs6834463_G	0.00022	1	Ref
rs117031590_A	0.00023	1	Ref
rs13061619_G	0.00023	1	Ref
rs1352836_T	0.00023	1	Ref
rs28583467_G	0.00023	1	Ref
rs7688831_G	0.00023	1	Ref
rs12410154_G	0.00024	1	Ref
rs3095351_C	0.00024	1	Ref
rs10849860_T	0.00025	1	Ref
rs13109582_C	0.00025	1	Ref
rs35941327_G	0.00025	1	Ref
rs7212330_A	0.00025	1	Ref
rs753726_G	0.00025	1	Ref
rs117478716_G	0.00026	1	Ref
rs180953596_C	0.00026	1	Ref
rs28764911_T	0.00027	1	Ref
rs1598866_T	0.00028	1	Ref
rs71402285_G	0.00028	1	Ref
rs744618_A	0.00028	1	Ref
rs10066853_C	0.00029	1	Ref
rs10950640_G	0.00029	1	Ref
rs13415315_G	0.00029	1	Ref
rs1598865_G	0.00029	1	Ref
rs1992733_A	0.00029	1	Ref
rs4863698_G	0.00029	1	Ref
rs61216514_G	0.00029	1	Ref
rs68024154_C	0.00029	1	Ref
rs6815667_T	0.00029	1	Ref
rs76779176_T	0.00029	1	Ref
rs9460775_G	0.00029	1	Ref
rs11012456_C	0.0003	1	Ref
rs11097980_C	0.0003	1	Ref
rs2523453_C	0.0003	1	Ref
rs368015499_C	0.0003	1	Ref
rs74461473_C	0.0003	1	Ref
rs827852_C	0.0003	1	Ref
rs10890177_T	0.00031	1	Ref
rs4243680_C	0.00032	1	Ref
rs2074506_G	0.00034	1	Ref
rs75602989_C	0.00034	1	Ref
rs72795073_C	0.00035	1	Ref
rs1754414_C	0.00036	1	Ref
rs1572168_A	0.00037	1	Ref
rs4684925_G	0.00038	1	Ref
rs7710489_T	0.00038	1	Ref
rs6843415_C	0.00039	1	Ref
rs7094266_T	0.00039	1	Ref
rs192435123_G	0.0004	1	Ref
rs7643728_C	0.0004	1	Ref
rs1997782_C	0.00041	1	Ref
rs2143423_G	0.00041	1	Ref
rs10960280_C	0.00042	1	Ref
rs6824796_T	0.00042	1	Ref
rs1264320_C	0.00043	1	Ref
rs6981437_A	0.00043	1	Ref
rs936071_A	0.00043	1	Ref
rs667778_T	0.00046	1	Ref
rs11098434_G	0.00047	1	Ref
rs1363101_T	0.00049	1	Ref
rs2406119_G	0.00049	1	Ref
rs2535331_G	0.00051	1	Ref
rs11851426_C	0.00052	1	Ref
rs185433150_A	0.00052	1	Ref
rs35730254_G	0.00053	1	Ref
rs654484_G	0.00053	1	Ref
rs2471560_C	0.00054	1	Ref
rs57501818_G	0.00054	1	Ref
rs73242632_C	0.00054	1	Ref
rs11723221_A	0.00057	1	Ref
rs9806513_G	0.00057	1	Ref
rs72775279_T	0.00058	1	Ref
rs7840258_C	0.00059	1	Ref
rs828007_A	0.00059	1	Ref
rs17165625_A	0.00061	1	Ref
rs77901312_C	0.00062	1	Ref
rs78310696_G	0.00063	1	Ref
rs9262293_C	0.00064	1	Ref
rs1342209_T	0.00065	1	Ref
rs7692075_T	0.00068	1	Ref
rs74472408_C	0.00069	1	Ref
rs10945539_A	0.0007	1	Ref
rs13124454_G	0.00071	1	Ref
rs4859899_G	0.00071	1	Ref
rs2679457_G	0.00074	1	Ref
rs9671908_G	0.00078	1	Ref
rs7328344_G	0.00079	1	Ref
rs534512636_C	0.00081	1	Ref
rs4842601_T	0.00083	1	Ref
rs839165_C	0.00083	1	Ref
rs7602672_A	0.00086	1	Ref
rs10479296_G	0.00087	1	Ref
rs11990740_G	0.00087	1	Ref
rs209808_G	0.00087	1	Ref
rs3130796_C	0.0009	1	Ref
rs55936031_A	0.00098	1	Ref
rs72795075_T	0.00099	1	Ref
rs4749774_T	0.00104	1	Ref
rs12878770_G	0.00105	1	Ref
rs2844521_C	0.00107	1	Ref
rs34613719_C	0.01003	1	Ref
rs2120842_G	0.00113	1	Ref
rs9364933_T	0.00117	1	Ref
rs7620958_T	0.00123	1	Ref
rs11130931_G	0.00133	1	Ref
rs72775262_A	0.00133	1	Ref
rs746566_C	0.00133	1	Ref
rs7849702_G	0.00135	1	Ref
rs34700098_C	0.00137	1	Ref
rs6964896_T	0.00137	1	Ref
rs2042065_A	0.00138	1	Ref
rs34415272_G	0.0014	1	Ref
rs4283691_G	0.00144	1	Ref
rs7659122_G	0.00147	1	Ref
rs76569059_C	0.00148	1	Ref
rs79237018_T	0.00149	1	Ref
rs112915369_T	0.00151	1	Ref
rs2174078_T	0.00166	1	Ref
rs58054752_C	0.00169	1	Ref
rs960941_A	0.0018	1	Ref
rs72983417_C	0.00195	1	Ref
rs10809606_T	0.00202	1	Ref
rs149797396_C	0.00209	1	Ref
rs2523484_C	0.00226	1	Ref
rs7837961_G	0.00234	1	Ref
rs10776957_T	0.00255	1	Ref
rs645715_C	0.00288	1	Ref
rs4140396_C	0.00351	1	Ref
rs581686_C	0.00502	1	Ref
rs9679727_T	0.00672	1	Ref
rs1000313_A	0.00023	1	Ref
rs10046033_A	0.00041	1	Ref
rs10069663_G	0.00242	1	Ref
rs10077219_G	0.0003	1	Ref
rs10275619_T	0.00278	1	Ref
rs10501386_G	0.00109	1	Ref
rs10792230_C	0.00114	1	Ref
rs10795651_G	0.00121	1	Ref
rs10858409_G	0.00035	1	Ref
rs10900077_G	0.00055	1	Ref
rs10960502_T	0.00164	1	Ref
rs11012446_A	0.00427	1	Ref
rs11012461_G	0.00032	1	Ref
rs11097965_G	0.00087	1	Ref
rs111415059_G	0.00135	1	Ref
rs113321184_G	0.00053	1	Ref
rs115300972_G	0.00057	1	Ref
rs11596994_G	0.00065	1	Ref
rs11624919_T	0.00203	1	Ref
rs12047348_G	0.00025	1	Ref
rs12102958_T	0.0002	1	Ref
rs12103403_C	0.00023	1	Ref
rs12152914_A	0.00065	1	Ref
rs12337214_C	0.00026	1	Ref
rs12433000_T	0.00167	1	Ref
rs12507613_G	0.00123	1	Ref
rs12509281_A	0.00046	1	Ref
rs1264305_C	0.00022	1	Ref
rs1264331_G	0.00272	1	Ref
rs1264334_G	0.0006	1	Ref
rs12649822_A	0.00027	1	Ref
rs12659965_G	0.00031	1	Ref
rs13119545_C	0.00022	1	Ref
rs13357251_G	0.00025	1	Ref
rs13386758_C	0.0002	1	Ref
rs13408052_G	0.00029	1	Ref
rs13411840_A	0.00041	1	Ref
rs13437574_T	0.00063	1	Ref
rs1371476_C	0.00095	1	Ref
rs1402626_A	0.00022	1	Ref
rs1455480_G	0.00031	1	Ref
rs1472786_C	0.0005	1	Ref
rs1501281_T	0.00065	1	Ref
rs1642645_A	0.0002	1	Ref
rs166391_G	0.00041	1	Ref
rs16873506_T	0.00067	1	Ref
rs17156606_C	0.00042	1	Ref
rs17189763_C	0.0002	1	Ref
rs17290188_G	0.00021	1	Ref
rs17409828_G	0.00019	1	Ref
rs17507699_T	0.00055	1	Ref
rs1754411_G	0.00024	1	Ref
rs192528221_G	0.00034	1	Ref
rs1961950_C	0.00094	1	Ref
rs2001839_C	0.00039	1	Ref
rs2074399_G	0.00024	1	Ref
rs2143424_C	0.00021	1	Ref
rs2214412_G	0.00024	1	Ref
rs2291534_C	0.0002	1	Ref
rs2315074_T	0.00017	1	Ref
rs2355159_C	0.00029	1	Ref
rs2391402_G	0.00024	1	Ref
rs2394449_A	0.00029	1	Ref
rs2395486_C	0.00026	1	Ref
rs2395487_C	0.00047	1	Ref
rs2517466_T	0.0002	1	Ref
rs2532939_C	0.00023	1	Ref
rs2535329_C	0.00107	1	Ref
rs2535336_A	0.00038	1	Ref
rs2567992_A	0.00019	1	Ref
rs2596559_A	0.00138	1	Ref
rs28366132_A	0.0002	1	Ref
rs28366137_C	0.00046	1	Ref
rs28373082_C	0.0003	1	Ref
rs2844658_G	0.00025	1	Ref
rs28520821_C	0.0003	1	Ref
rs2873368_C	0.00047	1	Ref
rs2886480_T	0.0004	1	Ref
rs3095344_C	0.00032	1	Ref
rs3095354_T	0.00061	1	Ref
rs3130786_A	0.00078	1	Ref
rs34161654_C	0.00032	1	Ref
rs34341630_C	0.00019	1	Ref
rs35220472_T	0.0016	1	Ref
rs35611996_C	0.00041	1	Ref
rs368857355_C	0.00024	1	Ref
rs41273021_C	0.00019	1	Ref
rs4708782_C	0.00066	1	Ref
rs4738593_A	0.00032	1	Ref
rs4859514_G	0.00034	1	Ref
rs4971486_C	0.00025	1	Ref
rs55991107_G	0.00024	1	Ref
rs57756309_T	0.00069	1	Ref
rs57991475_A	0.00024	1	Ref
rs58355643_A	0.00056	1	Ref
rs59201365_C	0.00029	1	Ref
rs601986_C	0.00043	1	Ref
rs61093051_C	0.00123	1	Ref
rs61772223_A	0.00036	1	Ref
rs61795453_C	0.00165	1	Ref
rs62108836_G	0.00056	1	Ref
rs631647_C	0.00052	1	Ref
rs6436000_T	0.00029	1	Ref
rs6451670_A	0.0027	1	Ref
rs6470956_C	0.00027	1	Ref
rs6538028_A	0.00235	1	Ref
rs6562840_A	0.00025	1	Ref
rs6597672_C	0.00043	1	Ref
rs6661460_A	0.00022	1	Ref
rs6689536_T	0.00082	1	Ref
rs6699171_A	0.0003	1	Ref
rs6754512_A	0.00175	1	Ref
rs6763159_T	0.00235	1	Ref
rs67955617_T	0.00021	1	Ref
rs6837593_A	0.00056	1	Ref
rs6928723_C	0.00031	1	Ref
rs7006330_G	0.00035	1	Ref
rs7136106_G	0.00025	1	Ref
rs7156276_A	0.00029	1	Ref
rs719403_G	0.00043	1	Ref
rs72652965_A	0.00019	1	Ref
rs72652974_C	0.00036	1	Ref
rs72775239_C	0.00108	1	Ref
rs72983433_A	0.00024	1	Ref
rs73235918_C	0.00037	1	Ref
rs73242623_C	0.00061	1	Ref
rs7332024_C	0.00024	1	Ref
rs73827451_A	0.0003	1	Ref
rs749555_C	0.00018	1	Ref
rs7515102_C	0.00045	1	Ref
rs75155142_C	0.00053	1	Ref
rs75292430_G	0.00022	1	Ref
rs7541929_G	0.00019	1	Ref
rs75451488_G	0.00074	1	Ref
rs7573385_C	0.00023	1	Ref
rs7614411_A	0.00039	1	Ref
rs76418747_C	0.00041	1	Ref
rs76762504_A	0.0002	1	Ref
rs77232851_G	0.00021	1	Ref
rs7723509_G	0.00033	1	Ref
rs7901323_C	0.00226	1	Ref
rs827858_T	0.00034	1	Ref
rs827859_T	0.0005	1	Ref
rs827869_A	0.00041	1	Ref
rs839156_A	0.00055	1	Ref
rs874014_A	0.00024	1	Ref
rs9343507_C	0.00023	1	Ref
rs9346746_C	0.00031	1	Ref
rs950263_C	0.00111	1	Ref
rs9543733_C	0.0002	1	Ref
rs9866562_C	0.00384	1	Ref
rs9936302_A	0.00036	1	Ref
rs28398301_C	0.00964	1	Ref
rs839168_C	0.00845	1	Ref
rs2035231_G	0.00639	1	Ref
rs6830993_A	0.00384	1	Ref
rs55837297_T	0.00339	1	Ref
rs2683867_T	0.00338	1	Ref
rs2406128_G	0.00301	1	Ref
rs10900426_G	0.00288	1	Ref
rs4709192_T	0.00253	1	Ref
rs12507708_A	0.00249	1	Ref
rs2428485_C	0.00242	1	Ref
rs73242618_A	0.00241	1	Ref
rs34690715_A	0.002	1	Ref
rs12265349_G	0.00198	1	Ref
rs4859898_T	0.00196	1	Ref
rs72613817_G	0.00195	1	Ref
rs839159_A	0.00183	1	Ref
rs6538029_C	0.00163	1	Ref
rs4410552_G	0.00154	1	Ref
rs4630561_T	0.00152	1	Ref
rs72472138_A	0.00152	1	Ref
rs4370813_G	0.00139	1	Ref
rs11012457_A	0.00138	1	Ref
rs143898047_G	0.00138	1	Ref
rs1417184_C	0.0013	1	Ref
rs12147169_G	0.00126	1	Ref
rs6919917_C	0.00119	1	Ref
rs113862218_T	0.00118	1	Ref
rs4709187_G	0.00114	1	Ref
rs6455579_C	0.0011	1	Ref
rs10930713_G	0.00109	1	Ref
rs12892744_C	0.00107	1	Ref
rs2153808_T	0.00103	1	Ref
rs4951145_T	0.00099	1	Ref
rs58863401_T	0.00098	1	Ref
rs9366944_A	0.00098	1	Ref
rs2471570_C	0.00097	1	Ref
rs72795018_C	0.00097	1	Ref
rs11732039_C	0.00094	1	Ref
rs10059643_G	0.00093	1	Ref
rs6542639_G	0.00093	1	Ref
rs7730865_G	0.00091	1	Ref
rs2438355_A	0.00089	1	Ref
rs865138_T	0.00086	1	Ref
rs7832023_T	0.00083	1	Ref
rs10078807_A	0.00082	1	Ref
rs4441969_G	0.0008	1	Ref
rs12877787_C	0.00078	1	Ref
rs113573208_A	0.00071	1	Ref
rs2844662_C	0.00071	1	Ref
rs117597747_C	0.00069	1	Ref
rs113409341_C	0.00068	1	Ref
rs6455580_A	0.00066	1	Ref
rs2088996_A	0.00064	1	Ref
rs3132576_G	0.00064	1	Ref
rs7620377_G	0.00064	1	Ref
rs13360205_A	0.00063	1	Ref
rs77931854_C	0.00062	1	Ref
rs7135741_G	0.00061	1	Ref
rs13102150_C	0.00059	1	Ref
rs2532935_C	0.00059	1	Ref
rs3131029_A	0.00058	1	Ref
rs6981267_A	0.00057	1	Ref
rs13357845_A	0.00056	1	Ref
rs143257133_C	0.00056	1	Ref
rs11994423_T	0.00055	1	Ref
rs1477784_A	0.00055	1	Ref
rs3850472_C	0.00055	1	Ref
rs2532942_C	0.00051	1	Ref
rs11650428_C	0.00049	1	Ref
rs117366037_A	0.00047	1	Ref
rs1516911_A	0.00047	1	Ref
rs56171387_G	0.00047	1	Ref
rs9349492_C	0.00047	1	Ref
rs1806876_C	0.00046	1	Ref
rs7648308_T	0.00046	1	Ref
rs6455576_C	0.00045	1	Ref
rs79535890_G	0.00045	1	Ref
rs2438353_T	0.00044	1	Ref
rs11969816_G	0.00043	1	Ref
rs4661318_T	0.00043	1	Ref
rs7823137_G	0.00043	1	Ref
rs1418315_A	0.00042	1	Ref
rs3095342_C	0.00042	1	Ref
rs4738589_A	0.00041	1	Ref
rs55788414_C	0.00041	1	Ref
rs6542633_C	0.00041	1	Ref
rs7801063_C	0.00041	1	Ref
rs4295362_C	0.0004	1	Ref
rs59346944_A	0.0004	1	Ref
rs9343517_G	0.0004	1	Ref
rs11758177_A	0.00039	1	Ref
rs13407048_T	0.00037	1	Ref
rs11887422_C	0.00036	1	Ref
rs62180954_G	0.00036	1	Ref
rs66732052_T	0.00036	1	Ref
rs941024_C	0.00036	1	Ref
rs11921202_T	0.00035	1	Ref
rs12586894_T	0.00035	1	Ref
rs1833515_G	0.00035	1	Ref
rs35216534_C	0.00034	1	Ref
rs6455564_C	0.00034	1	Ref
rs9350675_C	0.00034	1	Ref
rs9346743_A	0.00033	1	Ref
rs9856679_G	0.00033	1	Ref
rs10809626_C	0.00032	1	Ref
rs12917469_A	0.00032	1	Ref
rs2174079_C	0.00032	1	Ref
rs61793214_C	0.00032	1	Ref
rs9994802_C	0.00032	1	Ref
rs400245_T	0.00031	1	Ref
rs74581751_C	0.00031	1	Ref
rs12435016_A	0.0003	1	Ref
rs6859319_C	0.0003	1	Ref
rs111538459_T	0.00029	1	Ref
rs2122030_C	0.00028	1	Ref
rs12700796_T	0.00027	1	Ref
rs2596538_G	0.00027	1	Ref
rs73827459_A	0.00027	1	Ref
rs2532927_A	0.00026	1	Ref
rs77332991_C	0.00026	1	Ref
rs79314082_C	0.00026	1	Ref
rs827856_G	0.00026	1	Ref
rs10890176_A	0.00025	1	Ref
rs117023276_G	0.00025	1	Ref
rs34829893_G	0.00025	1	Ref
rs757180_A	0.00025	1	Ref
rs10078969_A	0.00024	1	Ref
rs10479297_A	0.00024	1	Ref
rs116566032_G	0.00024	1	Ref
rs4078523_A	0.00024	1	Ref
rs78788997_G	0.00024	1	Ref
rs7917492_T	0.00024	1	Ref
rs1217753_C	0.00023	1	Ref
rs17156636_C	0.00023	1	Ref
rs66484058_G	0.00023	1	Ref
rs67668653_G	0.00023	1	Ref
rs79379713_A	0.00023	1	Ref
rs79937119_A	0.00023	1	Ref
rs12623196_G	0.00022	1	Ref
rs138466776_C	0.00022	1	Ref
rs262822_C	0.00022	1	Ref
rs11595472_G	0.00021	1	Ref
rs13141617_T	0.00021	1	Ref
rs1602848_A	0.00021	1	Ref
rs113736768_G	0.0002	1	Ref
rs114359618_C	0.0002	1	Ref
rs1217752_A	0.0002	1	Ref
rs256965_G	0.0002	1	Ref
rs6441249_A	0.0002	1	Ref
rs7068018_T	0.0002	1	Ref
rs7856365_G	0.0002	1	Ref
rs11921435_A	0.00019	1	Ref
rs2517575_A	0.00019	1	Ref
rs2532943_A	0.00019	1	Ref
rs4859900_A	0.00019	1	Ref
rs58387887_C	0.00019	1	Ref
rs149300866_C	0.00017	1	Ref
rs57373979_T	0.00017	1	Ref
rs4562127_G	0.00763	1	Ref
rs1837848_G	0.005	1	Ref
rs11240300_A	0.00423	1	Ref
rs11815041_A	0.00268	1	Ref
rs1352834_A	0.00256	1	Ref
rs736556_T	0.00757	1	Ref
rs60487483_C	0.0024	1	Ref
rs6936576_G	0.00235	1	Ref
rs148640273_G	0.00233	1	Ref
rs78052642_G	0.00227	1	Ref
rs1539311_C	0.00705	1	Ref
rs72750316_G	0.002	1	Ref
rs72795043_C	0.002	1	Ref
rs12515429_C	0.00181	1	Ref
rs2813384_C	0.0017	1	Ref
rs12435477_G	0.00154	1	Ref
rs13136545_C	0.00149	1	Ref
rs35852981_G	0.00148	1	Ref
rs28454512_C	0.00145	1	Ref
rs844436_A	0.00139	1	Ref
rs13011467_G	0.00136	1	Ref
rs57527611_C	0.00136	1	Ref
rs28366136_C	0.00131	1	Ref
rs72652983_T	0.00122	1	Ref
rs7199749_G	0.0012	1	Ref
rs2532921_C	0.00114	1	Ref
rs6542627_C	0.0011	1	Ref
rs614406_G	0.00107	1	Ref
rs6696291_A	0.00098	1	Ref
rs12888666_C	0.00093	1	Ref
rs76459192_G	0.00093	1	Ref
rs61900767_T	0.00089	1	Ref
rs80202753_C	0.00079	1	Ref
rs16952387_G	0.00077	1	Ref
rs10455065_T	0.00074	1	Ref
rs117312134_C	0.00074	1	Ref
rs2252863_G	0.00074	1	Ref
rs6737145_A	0.00073	1	Ref
rs4688172_G	0.00071	1	Ref
rs111249465_A	0.00068	1	Ref
rs17165628_A	0.00066	1	Ref
rs6758385_G	0.00065	1	Ref
rs12513233_G	0.00064	1	Ref
rs28436763_T	0.00063	1	Ref
rs76221427_A	0.00062	1	Ref
rs61795163_C	0.00054	1	Ref
rs2535339_C	0.00053	1	Ref
rs827866_C	0.00053	1	Ref
rs55673370_G	0.00052	1	Ref
rs72652964_T	0.00052	1	Ref
rs35792668_A	0.00051	1	Ref
rs596650_C	0.00051	1	Ref
rs9318019_T	0.00044	1	Ref
rs11012465_G	0.00041	1	Ref
rs1421665_C	0.00041	1	Ref
rs4660587_G	0.0004	1	Ref
rs73220281_G	0.0004	1	Ref
rs9848338_G	0.00039	1	Ref
rs77394196_C	0.00037	1	Ref
rs1264302_C	0.00036	1	Ref
rs180878695_G	0.00036	1	Ref
rs3128973_T	0.00036	1	Ref
rs6892071_G	0.00036	1	Ref
rs7305998_T	0.00036	1	Ref
rs828000_T	0.00036	1	Ref
rs604145_T	0.00035	1	Ref
rs10181444_T	0.00034	1	Ref
rs2054398_A	0.00034	1	Ref
rs828008_G	0.00034	1	Ref
rs76247745_T	0.00033	1	Ref
rs2119701_T	0.00032	1	Ref
rs7672518_T	0.00032	1	Ref
rs13085008_C	0.00031	1	Ref
rs3844024_C	0.00031	1	Ref
rs10054977_T	0.0003	1	Ref
rs28474684_A	0.0003	1	Ref
rs372702_G	0.0003	1	Ref
rs7190181_G	0.0003	1	Ref
rs138741144_G	0.00029	1	Ref
rs1283_G	0.00028	1	Ref
rs1558951_A	0.00028	1	Ref
rs188721350_C	0.00028	1	Ref
rs4851978_G	0.00028	1	Ref
rs6494760_A	0.00028	1	Ref
rs72652999_C	0.00028	1	Ref
rs6815390_T	0.00027	1	Ref
rs7836135_T	0.00027	1	Ref
rs473030_C	0.00026	1	Ref
rs55837222_A	0.00026	1	Ref
rs61965278_G	0.00026	1	Ref
rs111665483_C	0.00023	1	Ref
rs6747251_C	0.00023	1	Ref
rs10437061_C	0.00022	1	Ref
rs10901338_T	0.00022	1	Ref
rs72775281_T	0.00022	1	Ref
rs13107432_A	0.00021	1	Ref
rs2532926_A	0.00021	1	Ref
rs6602316_T	0.00021	1	Ref
rs6785102_C	0.00021	1	Ref
rs6929686_A	0.00021	1	Ref
rs7002746_C	0.00021	1	Ref
rs111442290_G	0.0002	1	Ref
rs3911240_G	0.00411	1	Ref
rs9456275_C	0.00365	1	Ref
rs4331798_G	0.00341	1	Ref
rs642112_C	0.00334	1	Ref
rs79663426_C	0.00328	1	Ref
rs357122_C	0.00276	1	Ref
rs11997856_A	0.00273	1	Ref
rs7663359_C	0.00598	1	Ref
rs62108792_G	0.00937	1	Ref
rs17111230_G	0.00243	1	Ref
rs2406127_C	0.0022	1	Ref
rs200948278_G	0.00218	1	Ref
rs67000357_G	0.00203	1	Ref
rs4904421_C	0.00202	1	Ref
rs139001454_C	0.00198	1	Ref
rs827871_A	0.00505	1	Ref
rs11622908_A	0.00182	1	Ref
rs2517449_T	0.00166	1	Ref
rs28568918_C	0.00164	1	Ref
rs7755420_G	0.00162	1	Ref
rs6846322_G	0.00161	1	Ref
rs1906124_T	0.00158	1	Ref
rs13432405_C	0.00152	1	Ref
rs76141826_G	0.00152	1	Ref
rs79482421_G	0.00152	1	Ref
rs75232254_C	0.00147	1	Ref
rs2866688_G	0.00146	1	Ref
rs34262815_G	0.00135	1	Ref
rs55883908_T	0.00744	1	Ref
rs10129320_C	0.00131	1	Ref
rs55734137_T	0.00123	1	Ref
rs1505947_T	0.00119	1	Ref
rs55877192_A	0.00115	1	Ref
rs828002_A	0.001	1	Ref
rs10054331_C	0.00389	1	Ref
rs56003703_C	0.00091	1	Ref
rs7856194_A	0.00084	1	Ref
rs116488128_A	0.00083	1	Ref
rs112371853_G	0.00081	1	Ref
rs12658451_T	0.00077	1	Ref
rs789970_T	0.00076	1	Ref
rs2844542_C	0.00074	1	Ref
rs72820266_G	0.00074	1	Ref
rs2332982_A	0.00073	1	Ref
rs6533290_G	0.00069	1	Ref
rs6732954_A	0.00069	1	Ref
rs9346748_G	0.00069	1	Ref
rs2269315_A	0.00068	1	Ref
rs626655_G	0.00067	1	Ref
rs11240298_G	0.00065	1	Ref
rs4372475_G	0.00064	1	Ref
rs673855_C	0.00064	1	Ref
rs2813387_T	0.00062	1	Ref
rs150310611_G	0.00059	1	Ref
rs60135456_G	0.00059	1	Ref
rs6787031_C	0.00059	1	Ref
rs12002155_C	0.00057	1	Ref
rs6456500_A	0.00054	1	Ref
rs6822945_T	0.00054	1	Ref
rs7814333_T	0.00054	1	Ref
rs4660210_C	0.00052	1	Ref
rs6952327_A	0.00052	1	Ref
rs11594054_C	0.0005	1	Ref
rs17389505_A	0.00049	1	Ref
rs2844663_C	0.00047	1	Ref
rs7694140_G	0.00322	1	Ref
rs9921748_T	0.00044	1	Ref
rs1980173_C	0.00043	1	Ref
rs9996218_A	0.00316	1	Ref
rs11887729_G	0.00038	1	Ref
rs4709193_C	0.00038	1	Ref
rs1038698_C	0.00037	1	Ref
rs10903496_G	0.00037	1	Ref
rs34038004_C	0.00037	1	Ref
rs35670506_G	0.00037	1	Ref
rs117849444_A	0.00036	1	Ref
rs4665218_G	0.00035	1	Ref
rs1502880_G	0.00033	1	Ref
rs28605758_A	0.00033	1	Ref
rs1342210_A	0.00032	1	Ref
rs10751805_T	0.00031	1	Ref
rs6489800_C	0.00031	1	Ref
rs12660959_T	0.0003	1	Ref
rs4257880_A	0.0003	1	Ref
rs7644770_G	0.0003	1	Ref
rs79918420_C	0.0003	1	Ref
rs2252856_G	0.00029	1	Ref
rs17279331_G	0.00027	1	Ref
rs10102664_G	0.00026	1	Ref
rs12915890_C	0.00026	1	Ref
rs28591087_G	0.00026	1	Ref
rs12612849_C	0.00025	1	Ref
rs113955246_C	0.00023	1	Ref
rs2535338_C	0.00021	1	Ref
rs11242523_T	0.00227	1	Ref
rs117967427_C	0.00207	1	Ref
rs1850357_T	0.00196	1	Ref
rs7633380_G	0.00177	1	Ref
rs7706353_C	0.00169	1	Ref
rs6668887_T	0.00368	1	Ref
rs72795059_T	0.00135	1	Ref
rs11598916_G	0.00134	1	Ref
rs117594742_T	0.00127	1	Ref
rs2174080_C	0.00125	1	Ref
rs7826185_A	0.00125	1	Ref
rs10809623_G	0.00111	1	Ref
rs75661265_C	0.00109	1	Ref
rs12150130_C	0.00107	1	Ref
rs11937191_T	0.00106	1	Ref
rs6867959_T	0.00106	1	Ref
rs12897559_A	0.00103	1	Ref
rs56320556_G	0.00103	1	Ref
rs62108790_T	0.00103	1	Ref
rs111706332_G	0.00101	1	Ref
rs4365752_T	0.001	1	Ref
rs41344750_G	0.00099	1	Ref
rs9679542_T	0.00098	1	Ref
rs3801321_T	0.00087	1	Ref
rs9806036_A	0.00086	1	Ref
rs1363099_C	0.00085	1	Ref
rs7827069_C	0.00081	1	Ref
rs7550921_A	0.00079	1	Ref
rs28492914_G	0.00077	1	Ref
rs34320419_A	0.00077	1	Ref
rs11012468_A	0.00074	1	Ref
rs12658007_A	0.00072	1	Ref
rs1451308_T	0.00072	1	Ref
rs10756303_T	0.00067	1	Ref
rs34202070_C	0.00277	1	Ref
rs13150610_G	0.00063	1	Ref
rs80114931_A	0.00061	1	Ref
rs262829_A	0.0006	1	Ref
rs2813388_A	0.00059	1	Ref
rs6882380_T	0.00268	1	Ref
rs55932461_C	0.00054	1	Ref
rs13357862_C	0.00052	1	Ref
rs373385127_T	0.0005	1	Ref
rs385040_T	0.00047	1	Ref
rs55780768_G	0.00045	1	Ref
rs12894641_A	0.0025	1	Ref
rs140928958_G	0.00043	1	Ref
rs3132574_C	0.00043	1	Ref
rs3755904_G	0.00042	1	Ref
rs827870_A	0.00042	1	Ref
rs12901895_C	0.00245	1	Ref
rs28535226_C	0.0004	1	Ref
rs57868780_G	0.00037	1	Ref
rs9357253_A	0.00037	1	Ref
rs74039131_T	0.00035	1	Ref
rs9929253_C	0.00033	1	Ref
rs10134847_T	0.00032	1	Ref
rs34830730_C	0.00032	1	Ref
rs60226954_C	0.0003	1	Ref
rs11012460_A	0.00026	1	Ref
rs11012448_A	0.00225	1	Ref
rs7490055_A	0.0082	1	Ref
rs4900321_A	0.00589	1	Ref
rs6553857_C	0.00188	1	Ref
rs3095343_T	0.00184	1	Ref
rs11846693_G	0.00183	1	Ref
rs75628321_C	0.00169	1	Ref
rs1987295_C	0.00529	1	Ref
rs10193850_C	0.00147	1	Ref
rs200123578_T	0.01229	1	Ref
rs4782623_A	0.00498	1	Ref
rs2596562_T	0.00678	1	Ref
rs1947334_T	0.00129	1	Ref
rs57123654_T	0.00492	1	Ref
rs6538025_T	0.00122	1	Ref
rs112564482_G	0.00113	1	Ref
rs527154_C	0.00289	1	Ref
rs564692_A	0.00107	1	Ref
rs74039181_G	0.00281	1	Ref
rs10051182_G	0.00101	1	Ref
rs1479385_C	0.00097	1	Ref
rs2242151_C	0.00097	1	Ref
rs6727608_T	0.00097	1	Ref
rs8043592_A	0.00096	1	Ref
rs10507029_A	0.00095	1	Ref
rs9262251_G	0.00093	1	Ref
rs35207728_A	0.00083	1	Ref
rs112329101_A	0.0008	1	Ref
rs10263336_G	0.00421	1	Ref
rs4083557_C	0.00071	1	Ref
rs28772735_T	0.0007	1	Ref
rs193016457_G	0.00064	1	Ref
rs10751804_G	0.00231	1	Ref
rs10903494_T	0.0006	1	Ref
rs4334094_T	0.00059	1	Ref
rs10901337_C	0.00057	1	Ref
rs2332403_T	0.00223	1	Ref
rs13180552_T	0.00053	1	Ref
rs12352337_T	0.0005	1	Ref
[truncated: 3,791 more rows]

## Sheet: TBX5 Ki values
SNP_Allele	Binding_Constant	FC_log2	Allele_Type
rs10002090_C	0.00015	0	Alt
rs10002090_T	0.00015	1	Ref
rs1000313_A	0.00026	1	Ref
rs1000313_G	0.00023	-0.0593577	Alt
rs1000613_C	0.00031	1	Ref
rs1000613_T	0.00025	-0.113321	Alt
rs10008529_C	0.00026	1	Ref
rs10008529_T	0.0002	-0.121263	Alt
rs10008693_A	0.00017	-0.242955	Alt
rs10008693_G	0.00029	1	Ref
rs10008707_A	0.0013	1	Ref
rs10008707_T	0.00133	0.0240554	Alt
rs10008811_A	0.00018	0.0441053	Alt
rs10008811_T	0.00016	1	Ref
rs10019912_C	0.00052	1	Ref
rs10019912_T	0.0004	-0.183591	Alt
rs10020098_C	0.00016	1	Ref
rs10020098_G	0.00016	0	Alt
rs10023009_C	0.00056	0.323913	Alt
rs10023009_G	0.00035	1	Ref
rs10024868_C	0.0003	-0.0717678	Alt
rs10024868_T	0.00034	1	Ref
rs10025409_A	0.0003	1	Ref
rs10025409_G	0.0003	0	Alt
rs10026915_A	0.00016	0.0454963	Alt
rs10026915_C	0.00014	1	Ref
rs10034395_A	0.00063	-0.204852	Alt
rs10034395_G	0.0008	1	Ref
rs10035851_C	0.00016	1	Ref
rs10035851_T	0.00018	0.0441053	Alt
rs10038493_A	0.00023	0.126586	Alt
rs10038493_G	0.00017	1	Ref
rs10041776_C	0.00022	1	Ref
rs10041776_T	0.00023	0.0203413	Alt
rs10043094_A	0.00022	1	Ref
rs10043094_C	0.0002	-0.0415638	Alt
rs10046033_A	0.00019	1	Ref
rs10046033_T	0.00019	0	Alt
rs10051182_A	0.00019	0.0656624	Alt
rs10051182_G	0.00016	1	Ref
rs10051990_G	0.00048	-0.0296174	Alt
rs10051990_T	0.0005	1	Ref
rs10052188_G	0.0003	-0.0182794	Alt
rs10052188_T	0.00031	1	Ref
rs10052644_C	0.00082	1	Ref
rs10052644_G	0.00087	0.0542734	Alt
rs10052804_A	0.00023	1	Ref
rs10052804_T	0.00021	-0.0409735	Alt
rs10053368_A	0.00041	1	Ref
rs10053368_G	0.00039	-0.0326321	Alt
rs10053371_A	0.00018	1	Ref
rs10053371_T	0.00015	-0.0666741	Alt
rs10053572_C	0.00026	-0.038257	Alt
rs10053572_G	0.00028	1	Ref
rs10054331_C	0.00018	1	Ref
rs10054331_T	0.00018	0	Alt
rs10054977_G	0.00046	0.231523	Alt
rs10054977_T	0.00032	1	Ref
rs1005633_A	0.00027	-0.0745498	Alt
rs1005633_C	0.00031	1	Ref
rs10057459_A	0.00026	0.079699	Alt
rs10057459_G	0.00022	1	Ref
rs10057469_G	0.00138	1	Ref
rs10057469_T	0.00143	0.0381838	Alt
rs10059643_A	0.00028	0.18076	Alt
rs10059643_G	0.00019	1	Ref
rs10059898_A	0.0003	0.0755257	Alt
rs10059898_G	0.00026	1	Ref
rs10060837_A	0.00029	0.136711	Alt
rs10060837_C	0.00022	1	Ref
rs10063717_C	0.00412	-0.0340621	Alt
rs10063717_G	0.00423	1	Ref
rs10064089_C	0.00058	1	Ref
rs10064089_T	0.00063	0.0662355	Alt
rs10064210_A	0.00086	-0.0106926	Alt
rs10064210_G	0.00087	1	Ref
rs10064425_C	0.00021	-0.0206322	Alt
rs10064425_T	0.00022	1	Ref
rs10064760_A	0.00031	1	Ref
rs10064760_G	0.00033	0.0358784	Alt
rs10066853_C	0.00016	1	Ref
rs10066853_G	0.00015	-0.0225688	Alt
rs10069663_A	0.00016	-0.188649	Alt
rs10069663_G	0.00025	1	Ref
rs10071115_A	0.00036	-0.0503753	Alt
rs10071115_C	0.00039	1	Ref
rs10071470_G	0.00062	0.0131244	Alt
rs10071470_T	0.00061	1	Ref
rs10071534_C	0.00021	-0.212187	Alt
rs10071534_T	0.00032	1	Ref
rs10071791_C	0.00029	0.0765275	Alt
rs10071791_T	0.00025	1	Ref
rs10072579_C	0.00026	1	Ref
rs10072579_G	0.00022	-0.079699	Alt
rs10072849_C	0.00025	1	Ref
rs10072849_T	0.00024	-0.0197834	Alt
rs10073505_C	0.00062	-0.377228	Alt
rs10073505_G	0.00095	1	Ref
rs10073929_A	0.00035	1	Ref
rs10073929_G	0.00037	0.0341783	Alt
rs10076839_A	0.00078	0.11888	Alt
rs10076839_G	0.00068	1	Ref
rs10077219_A	0.00032	0.0735988	Alt
rs10077219_G	0.00028	1	Ref
rs10078807_A	0.00022	1	Ref
rs10078807_G	0.00024	0.0403998	Alt
rs10078969_A	0.00014	1	Ref
rs10078969_C	0.00014	0	Alt
rs10079000_A	0.00039	0.0165971	Alt
rs10079000_C	0.00038	1	Ref
rs10099891_A	0.00027	0.078613	Alt
rs10099891_T	0.00023	1	Ref
rs10100750_C	0.00031	1	Ref
rs10100750_T	0.0003	-0.0182794	Alt
rs10102664_G	0.0004	1	Ref
rs10102664_T	0.00025	-0.268181	Alt
rs10105287_G	0.0002	1	Ref
rs10105287_T	0.00026	0.121263	Alt
rs10107046_C	0.00028	1	Ref
rs10107046_G	0.00027	-0.0190017	Alt
rs1010728_A	0.00033	0.0914265	Alt
rs1010728_G	0.00028	1	Ref
rs10117546_A	0.00036	-0.0337782	Alt
rs10117546_G	0.00038	1	Ref
rs10129178_C	0.00035	1	Ref
rs10129178_T	0.00052	0.267565	Alt
rs10129320_C	0.00097	1	Ref
rs10129320_T	0.00099	0.0197058	Alt
rs10130801_A	0.00038	0.0167902	Alt
rs10130801_T	0.00037	1	Ref
rs10133981_G	0.00072	1	Ref
rs10133981_T	0.00081	0.103981	Alt
rs10134847_C	0.00032	0.0363301	Alt
rs10134847_T	0.0003	1	Ref
rs10138748_A	0.00066	-0.505369	Alt
rs10138748_C	0.00114	1	Ref
rs10139926_A	0.00036	0.0880764	Alt
rs10139926_G	0.00031	1	Ref
rs10140383_A	0.00034	-0.0683662	Alt
rs10140383_G	0.00038	1	Ref
rs10141625_C	0.0004	0.0164083	Alt
rs10141625_T	0.00039	1	Ref
rs10143161_A	0.00046	0	Alt
rs10143161_G	0.00046	1	Ref
rs10145823_C	0.00026	1	Ref
rs10145823_T	0.00023	-0.0593577	Alt
rs10148207_A	0.00029	1	Ref
rs10148207_G	0.00024	-0.0963109	Alt
rs10151544_A	0.00027	0	Alt
rs10151544_T	0.00027	1	Ref
rs1015812_G	0.00025	1	Ref
rs1015812_T	0.00022	-0.0601832	Alt
rs10164527_A	0.00022	0.0206322	Alt
rs10164527_G	0.00021	1	Ref
rs10164620_A	0.00043	-0.076818	Alt
rs10164620_G	0.00048	1	Ref
rs10167048_A	0.00019	0	Alt
rs10167048_T	0.00019	1	Ref
rs10168705_A	0.00042	1	Ref
rs10168705_G	0.0004	-0.0322672	Alt
rs10169305_A	0.00026	0.079699	Alt
rs10169305_G	0.00022	1	Ref
rs10170886_A	0.00092	0.128873	Alt
rs10170886_G	0.0008	1	Ref
rs10171199_A	0.00028	1	Ref
rs10171199_G	0.00032	0.0735988	Alt
rs10173216_C	0.00155	0.213642	Alt
rs10173216_T	0.00127	1	Ref
rs10173724_A	0.00043	-0.0465799	Alt
rs10173724_C	0.00046	1	Ref
rs10173912_C	0.00018	1	Ref
rs10173912_T	0.00018	0	Alt
rs1017555_C	0.00025	1	Ref
rs1017555_G	0.00024	-0.0197834	Alt
rs1017556_A	0.00025	0	Alt
rs1017556_G	0.00025	1	Ref
rs10175615_A	0.0002	0.0212397	Alt
rs10175615_G	0.00019	1	Ref
rs10181444_C	0.00032	-0.0528354	Alt
rs10181444_T	0.00035	1	Ref
rs10186057_A	0.00019	1	Ref
rs10186057_T	0.00015	-0.0882312	Alt
rs10187271_A	0.00022	1	Ref
rs10187271_G	0.00022	0	Alt
rs10190731_C	0.00025	1	Ref
rs10190731_G	0.00016	-0.188649	Alt
rs10193134_C	0.00027	0.140518	Alt
rs10193134_T	0.0002	1	Ref
rs10193850_C	0.00072	1	Ref
rs10193850_T	0.00037	-0.495402	Alt
rs10197165_A	0.00027	0.205199	Alt
rs10197165_C	0.00017	1	Ref
rs10202733_A	0.00017	1	Ref
rs10202733_G	0.00016	-0.0222212	Alt
rs10203893_C	0.00033	1	Ref
rs10203893_T	0.00027	-0.110428	Alt
rs10208318_C	0.00028	0.138588	Alt
rs10208318_T	0.00021	1	Ref
rs10211283_A	0.00024	-0.0392992	Alt
rs10211283_G	0.00026	1	Ref
rs10216561_G	0.00021	-0.0409735	Alt
rs10216561_T	0.00023	1	Ref
rs10216927_A	0.00029	1	Ref
rs10216927_T	0.00031	0.0367934	Alt
rs10216952_C	0.00017	1	Ref
rs10216952_T	0.00016	-0.0222212	Alt
rs10216955_G	0.00026	1	Ref
rs10216955_T	0.00021	-0.100331	Alt
rs1022286_A	0.00039	0.0849633	Alt
rs1022286_G	0.00034	1	Ref
rs10238108_A	0.00228	0.0316595	Alt
rs10238108_T	0.00222	1	Ref
rs10239543_C	0.00099	0.303875	Alt
rs10239543_T	0.00071	1	Ref
rs10240028_A	0.00049	1	Ref
rs10240028_G	0.00052	0.0437543	Alt
rs10253830_A	0.00066	0.104565	Alt
rs10253830_G	0.00058	1	Ref
rs10262140_C	0.00021	-0.0409735	Alt
rs10262140_T	0.00023	1	Ref
rs10263336_C	0.0002	-0.0209316	Alt
rs10263336_G	0.00021	1	Ref
rs10264581_A	0.00014	-0.0229275	Alt
rs10264581_G	0.00015	1	Ref
rs10267274_C	0.00044	-0.119763	Alt
rs10267274_G	0.00052	1	Ref
rs10270704_A	0.00025	1	Ref
rs10270704_T	0.00027	0.0387711	Alt
rs10275619_G	0.0007	0.281608	Alt
rs10275619_T	0.00049	1	Ref
rs10283652_A	0.0002	0.0869021	Alt
rs10283652_G	0.00016	1	Ref
rs1029580_A	0.0002	1	Ref
rs1029580_T	0.0002	0	Alt
rs1038698_A	0.00025	-0.131372	Alt
rs1038698_C	0.00032	1	Ref
rs1039467_A	0.00051	-0.125016	Alt
rs1039467_G	0.0006	1	Ref
rs1040534_A	0.00044	-0.683376	Alt
rs1040534_T	0.001	1	Ref
rs10428319_C	0.00015	0.0229275	Alt
rs10428319_G	0.00014	1	Ref
rs10434012_C	0.0004	0.248665	Alt
rs10434012_T	0.00026	1	Ref
rs10437061_C	0.00019	1	Ref
rs10437061_T	0.0002	0.0212397	Alt
rs10448155_G	0.00032	0.254358	Alt
rs10448155_T	0.00019	1	Ref
rs10455065_C	0.00052	-0.0972108	Alt
rs10455065_T	0.00059	1	Ref
rs10455066_G	0.00022	-0.0403998	Alt
rs10455066_T	0.00024	1	Ref
rs10455815_A	0.0004	1	Ref
rs10455815_G	0.00039	-0.0164083	Alt
rs10455817_A	0.00077	1	Ref
rs10455817_G	0.00081	0.0452912	Alt
rs10467409_A	0.00018	1	Ref
rs10467409_G	0.00018	0	Alt
rs10467412_A	0.00029	1	Ref
rs10467412_T	0.00034	0.0902818	Alt
rs10477834_A	0.00022	1	Ref
rs10477834_C	0.00027	0.0989543	Alt
rs10477835_A	0.00018	0.0896016	Alt
rs10477835_T	0.00014	1	Ref
rs10479296_A	0.00029	-0.018514	Alt
rs10479296_G	0.0003	1	Ref
rs10479298_A	0.00033	0	Alt
rs10479298_G	0.00033	1	Ref
rs10479300_C	0.00021	-0.0409735	Alt
rs10479300_T	0.00023	1	Ref
rs10485013_A	0.00022	1	Ref
rs10485013_G	0.00024	0.0403998	Alt
rs10488555_C	0.00037	0.051576	Alt
rs10488555_T	0.00034	1	Ref
rs10495682_A	0.0002	0.0427968	Alt
rs10495682_T	0.00018	1	Ref
rs10498910_A	0.00015	1	Ref
rs10498910_G	0.00017	0.04479	Alt
rs10501386_A	0.00042	0.0160434	Alt
rs10501386_G	0.00041	1	Ref
rs10507029_A	0.00027	1	Ref
rs10507029_G	0.00031	0.0745498	Alt
rs10508636_G	0.00037	0.141858	Alt
rs10508636_T	0.00029	1	Ref
rs10516580_A	0.00032	1	Ref
rs10516580_G	0.00036	0.0700257	Alt
rs1052413_A	0.00034	-0.0849633	Alt
rs1052413_T	0.00039	1	Ref
rs1052414_A	0.0005	0.346223	Alt
rs1052414_G	0.00029	1	Ref
rs1073329_A	0.0003	1	Ref
rs1073329_G	0.00031	0.0182794	Alt
rs10736422_C	0.0006	1	Ref
rs10736422_T	0.00065	0.0650409	Alt
rs10738253_C	0.00019	1	Ref
rs10738253_T	0.00021	0.0421713	Alt
rs10745407_C	0.0002	0.0212397	Alt
rs10745407_T	0.00019	1	Ref
rs10745408_C	0.00028	1	Ref
rs10745408_G	0.00028	0	Alt
rs10745677_C	0.00022	-0.0203413	Alt
rs10745677_T	0.00023	1	Ref
rs10749159_A	0.00018	0	Alt
rs10749159_G	0.00018	1	Ref
rs10751804_A	0.00023	0.0409735	Alt
rs10751804_G	0.00021	1	Ref
rs10751805_A	0.00027	-0.0926005	Alt
rs10751805_T	0.00032	1	Ref
rs10752140_A	0.00062	0.136948	Alt
rs10752140_T	0.00052	1	Ref
rs1075488_C	0.00032	1	Ref
rs1075488_T	0.00029	-0.0548441	Alt
rs1075489_C	0.00021	0.0209316	Alt
rs1075489_T	0.0002	1	Ref
rs10756292_A	0.00026	-0.0570117	Alt
rs10756292_G	0.00029	1	Ref
rs10756293_C	0.00022	1	Ref
rs10756293_G	0.00016	-0.128466	Alt
rs10756294_A	0.00017	1	Ref
rs10756294_G	0.00034	0.333237	Alt
rs10756296_G	0.00018	1	Ref
rs10756296_T	0.00025	0.144544	Alt
rs10756303_G	0.00019	0.0215571	Alt
rs10756303_T	0.00018	1	Ref
rs10776953_G	0.00017	1	Ref
rs10776953_T	0.00015	-0.04479	Alt
rs10776955_C	0.00022	1	Ref
rs10776955_T	0.00022	0	Alt
rs10776957_A	0.00031	-0.279812	Alt
rs10776957_T	0.00048	1	Ref
rs10776959_A	0.00028	-0.0187547	Alt
rs10776959_C	0.00029	1	Ref
rs10787522_A	0.00022	0.106245	Alt
rs10787522_G	0.00017	1	Ref
rs10792230_C	0.00024	1	Ref
rs10792230_T	0.00022	-0.0403998	Alt
rs10792233_A	0.00046	1	Ref
rs10792233_C	0.00034	-0.196086	Alt
rs10794764_C	0.00086	1	Ref
rs10794764_T	0.00081	-0.0546849	Alt
rs10795651_A	0.0003	0	Alt
rs10795651_G	0.0003	1	Ref
rs10803349_A	0.00024	0.0403998	Alt
rs10803349_T	0.00022	1	Ref
rs10803350_C	0.0006	0.230341	Alt
rs10803350_T	0.00044	1	Ref
rs10803351_A	0.00042	0	Alt
rs10803351_G	0.00042	1	Ref
rs10806695_G	0.0002	0	Alt
rs10806695_T	0.0002	1	Ref
rs10809606_A	0.00073	0.686946	Alt
rs10809606_T	0.00027	1	Ref
rs10809610_C	0.00023	1	Ref
rs10809610_G	0.0002	-0.0619051	Alt
rs10809617_G	0.00033	0.149199	Alt
rs10809617_T	0.00025	1	Ref
rs10809623_A	0.00051	0.0293165	Alt
rs10809623_G	0.00049	1	Ref
rs10809626_C	0.0002	1	Ref
rs10809626_T	0.00019	-0.0212397	Alt
rs10809629_G	0.00037	0	Alt
rs10809629_T	0.00037	1	Ref
rs10809634_C	0.0007	-0.670014	Alt
rs10809634_T	0.0014	1	Ref
rs10828163_A	0.00017	0.0222212	Alt
rs10828163_G	0.00016	1	Ref
rs10828164_A	0.00031	1	Ref
rs10828164_G	0.00031	0	Alt
rs10828167_A	0.00059	0.232668	Alt
rs10828167_G	0.00043	1	Ref
rs10849860_C	0.00047	0.0460838	Alt
rs10849860_T	0.00044	1	Ref
rs10856991_A	0.00124	0.868724	Alt
rs10856991_C	0.00046	1	Ref
rs10858408_C	0.00018	-0.0637284	Alt
rs10858408_G	0.00021	1	Ref
rs10858409_G	0.00029	1	Ref
rs10858409_T	0.00031	0.0367934	Alt
rs10859679_A	0.00027	1	Ref
rs10859679_T	0.0003	0.0562704	Alt
rs10873389_A	0.00025	-0.0387711	Alt
rs10873389_G	0.00027	1	Ref
rs10883987_C	0.00018	1	Ref
rs10883987_T	0.00018	0	Alt
rs10885543_G	0.00015	1	Ref
rs10885543_T	0.00018	0.0666741	Alt
rs10890170_A	0.0003	1	Ref
rs10890170_C	0.00021	-0.175857	Alt
rs10890176_A	0.00075	1	Ref
rs10890176_T	0.00055	-0.255048	Alt
rs10890177_C	0.00022	0.0415638	Alt
rs10890177_T	0.0002	1	Ref
rs10897077_A	0.00018	1	Ref
rs10897077_C	0.00017	-0.0218841	Alt
rs10897085_A	0.00022	0.0206322	Alt
rs10897085_T	0.00021	1	Ref
rs10900077_A	0.0002	-0.0619051	Alt
rs10900077_G	0.00023	1	Ref
rs10900426_A	0.00023	0	Alt
rs10900426_G	0.00023	1	Ref
rs10900427_C	0.0002	1	Ref
rs10900427_G	0.00017	-0.0646809	Alt
rs10900428_A	0.0003	0.0950415	Alt
rs10900428_T	0.00025	1	Ref
rs10900429_A	0.00033	-0.151249	Alt
rs10900429_G	0.00042	1	Ref
rs10900430_A	0.00048	1	Ref
rs10900430_C	0.00041	-0.108728	Alt
rs10901336_G	0.00067	-0.46592	Alt
rs10901336_T	0.00111	1	Ref
rs10901337_C	0.00023	1	Ref
rs10901337_G	0.00022	-0.0203413	Alt
rs10901338_C	0.00015	-0.04479	Alt
rs10901338_T	0.00017	1	Ref
rs10903494_G	0.00021	0.0421713	Alt
rs10903494_T	0.00019	1	Ref
rs10903496_A	0.00023	-0.0593577	Alt
rs10903496_G	0.00026	1	Ref
rs10927672_A	0.00035	1	Ref
rs10927672_G	0.00032	-0.0528354	Alt
rs10930712_A	0.00089	0.0211503	Alt
rs10930712_G	0.00087	1	Ref
rs10930713_A	0.0005	0	Alt
rs10930713_G	0.0005	1	Ref
rs10936976_C	0.00056	-0.0137498	Alt
rs10936976_T	0.00057	1	Ref
rs10945539_A	0.00084	1	Ref
rs10945539_G	0.00057	-0.328957	Alt
rs10945540_A	0.00038	0.0167902	Alt
rs10945540_G	0.00037	1	Ref
rs10945541_A	0.00042	1	Ref
rs10945541_G	0.00044	0.0315612	Alt
rs10950640_C	0.0002	-0.0619051	Alt
rs10950640_G	0.00023	1	Ref
rs10960270_A	0.00041	1	Ref
rs10960270_G	0.00055	0.209834	Alt
rs10960277_A	0.00034	0.0717678	Alt
rs10960277_T	0.0003	1	Ref
rs10960280_C	0.00049	1	Ref
rs10960280_G	0.00051	0.0293165	Alt
rs10960292_C	0.00018	-0.0637284	Alt
rs10960292_T	0.00021	1	Ref
rs10960318_A	0.00028	1	Ref
rs10960318_T	0.00026	-0.038257	Alt
rs10960340_A	0.00047	0.126321	Alt
rs10960340_C	0.00039	1	Ref
rs10960497_C	0.00022	1	Ref
rs10960497_T	0.00016	-0.128466	Alt
rs10960498_C	0.00018	0	Alt
rs10960498_T	0.00018	1	Ref
rs10960499_G	0.00023	0.0619051	Alt
rs10960499_T	0.0002	1	Ref
rs10960502_C	0.00029	0.0377564	Alt
rs10960502_T	0.00027	1	Ref
rs10960516_A	0.0003	1	Ref
rs10960516_T	0.00028	-0.0372687	Alt
rs11012419_C	0.00014	1	Ref
rs11012419_T	0.0002	0.132398	Alt
rs11012422_A	0.00053	-0.122653	Alt
rs11012422_G	0.00062	1	Ref
rs11012427_A	0.00108	1	Ref
rs11012427_G	0.00104	-0.0373714	Alt
rs11012428_C	0.00025	1	Ref
rs11012428_T	0.00028	0.0577728	Alt
rs11012433_A	0.00066	-0.143879	Alt
rs11012433_G	0.00078	1	Ref
rs11012434_C	0.00026	-0.038257	Alt
rs11012434_T	0.00028	1	Ref
rs11012436_A	0.00044	0.1652	Alt
rs11012436_G	0.00034	1	Ref
rs11012437_C	0.00012	1	Ref
rs11012437_T	0.00015	0.0699054	Alt
rs11012438_A	0.00048	-0.552555	Alt
rs11012438_G	0.00093	1	Ref
rs11012439_A	0.00041	-0.522173	Alt
rs11012439_T	0.0008	1	Ref
rs11012440_C	0.0002	0	Alt
rs11012440_T	0.0002	1	Ref
rs11012441_A	0.00032	1	Ref
rs11012441_T	0.00033	0.0178277	Alt
rs11012442_A	0.00015	1	Ref
rs11012442_G	0.00014	-0.0229275	Alt
rs11012443_C	0.00031	0.0938051	Alt
rs11012443_T	0.00026	1	Ref
rs11012444_A	0.00017	-0.0646809	Alt
rs11012444_G	0.0002	1	Ref
rs11012445_A	0.00044	1	Ref
rs11012445_G	0.00054	0.148212	Alt
rs11012446_A	0.00038	1	Ref
rs11012446_G	0.00037	-0.0167902	Alt
rs11012447_A	0.00156	1	Ref
rs11012447_C	0.0016	0.0279566	Alt
rs11012448_A	0.00028	1	Ref
rs11012448_T	0.00031	0.0555481	Alt
rs11012449_A	0.00044	1	Ref
rs11012449_G	0.00044	0	Alt
rs11012450_A	0.00029	1	Ref
rs11012450_G	0.00026	-0.0570117	Alt
rs11012451_C	0.00019	-0.0831448	Alt
rs11012451_T	0.00023	1	Ref
rs11012455_A	0.0004	1	Ref
rs11012455_C	0.00038	-0.0330054	Alt
rs11012456_C	0.0002	1	Ref
rs11012456_T	0.00016	-0.0869021	Alt
rs11012457_A	0.00019	1	Ref
rs11012457_G	0.0002	0.0212397	Alt
rs11012458_C	0.00035	1	Ref
rs11012458_T	0.00038	0.0509686	Alt
rs11012459_A	0.00018	1	Ref
rs11012459_G	0.0002	0.0427968	Alt
rs11012460_A	0.00025	1	Ref
rs11012460_C	0.0002	-0.101747	Alt
rs11012461_A	0.00029	0.157343	Alt
rs11012461_G	0.00021	1	Ref
rs11012462_A	0.00017	0	Alt
rs11012462_T	0.00017	1	Ref
rs11012463_A	0.00027	1	Ref
rs11012463_G	0.00033	0.110428	Alt
rs11012464_A	0.00019	1	Ref
rs11012464_T	0.00022	0.0628035	Alt
rs11012465_C	0.00026	0.0593577	Alt
rs11012465_G	0.00023	1	Ref
rs11012466_A	0.00023	-0.134883	Alt
rs11012466_T	0.0003	1	Ref
rs11012467_A	0.00053	-0.082916	Alt
rs11012467_G	0.00059	1	Ref
rs11012468_A	0.00277	1	Ref
rs11012468_G	0.00288	0.0479597	Alt
rs11012469_G	0.00035	1	Ref
rs11012469_T	0.00041	0.100198	Alt
rs11065484_A	0.00015	0.0229275	Alt
rs11065484_G	0.00014	1	Ref
rs11065494_A	0.00022	1	Ref
rs11065494_C	0.0002	-0.0415638	Alt
rs11065495_A	0.00037	-0.303485	Alt
rs11065495_C	0.00057	1	Ref
rs11065496_A	0.00025	-0.0387711	Alt
rs11065496_G	0.00027	1	Ref
rs11065497_A	0.00032	1	Ref
rs11065497_C	0.00028	-0.0735988	Alt
rs1107897_A	0.00016	1	Ref
rs1107897_T	0.00013	-0.068794	Alt
rs11096530_A	0.00028	-0.0555481	Alt
rs11096530_G	0.00031	1	Ref
rs11097965_G	0.00045	1	Ref
rs11097965_T	0.0002	-0.449282	Alt
rs11097980_C	0.00063	1	Ref
rs11097980_T	0.00049	-0.193708	Alt
rs11098003_C	0.00052	1	Ref
rs11098003_T	0.00042	-0.151324	Alt
rs11098434_A	0.00036	0.0521981	Alt
rs11098434_G	0.00033	1	Ref
rs11100326_A	0.00052	1	Ref
rs11100326_G	0.00049	-0.0437543	Alt
rs11103912_C	0.00087	-0.122487	Alt
rs11103912_T	0.00099	1	Ref
rs11103915_C	0.00022	0.151035	Alt
rs11103915_T	0.00015	1	Ref
rs11107420_A	0.00023	1	Ref
rs11107420_G	0.0003	0.134883	Alt
rs111248746_C	0.00025	0	Alt
rs111248746_G	0.00025	1	Ref
rs111249465_A	0.00025	1	Ref
rs111249465_G	0.00022	-0.0601832	Alt
rs111249770_A	0.00019	0	Alt
rs111249770_G	0.00019	1	Ref
rs111256062_C	0.00037	1	Ref
rs111256062_T	0.00037	0	Alt
rs11130727_A	0.00133	-0.0698494	Alt
rs11130727_T	0.00142	1	Ref
rs11130929_A	0.00036	1	Ref
rs11130929_G	0.00033	-0.0521981	Alt
rs11130931_A	0.00023	0.104702	Alt
rs11130931_G	0.00018	1	Ref
rs11130932_A	0.00044	-0.0155254	Alt
rs11130932_G	0.00045	1	Ref
rs11130934_A	0.0003	1	Ref
rs11130934_G	0.00048	0.298092	Alt
rs1113677_G	0.00034	0.109037	Alt
rs1113677_T	0.00028	1	Ref
rs111415059_A	0.00033	-0.135205	Alt
rs111415059_G	0.00041	1	Ref
rs111442290_A	0.00019	-0.122987	Alt
rs111442290_G	0.00025	1	Ref
rs111538459_C	0.00031	-0.0180507	Alt
rs111538459_T	0.00032	1	Ref
rs11159838_G	0.00101	1	Ref
rs11159838_T	0.00103	0.0191818	Alt
rs11159839_A	0.00025	1	Ref
rs11159839_G	0.00024	-0.0197834	Alt
rs11159840_A	0.00108	0.145433	Alt
rs11159840_G	0.00093	1	Ref
rs11160331_A	0.00016	0	Alt
rs11160331_G	0.00016	1	Ref
rs11160332_A	0.0006	1	Ref
rs11160332_G	0.00068	0.102703	Alt
rs11160333_C	0.00021	1	Ref
rs11160333_T	0.00021	0	Alt
rs111665483_C	0.00023	1	Ref
rs111665483_T	0.00034	0.206651	Alt
rs111706332_A	0.00028	0.0190017	Alt
rs111706332_G	0.00027	1	Ref
rs111789763_C	0.0007	0.127276	Alt
rs111789763_T	0.0006	1	Ref
rs111792270_A	0.00107	0.0959429	Alt
rs111792270_G	0.00097	1	Ref
rs111908579_C	0.00024	1	Ref
rs111908579_G	0.00025	0.0197834	Alt
rs11196687_A	0.00023	0.0831448	Alt
rs11196687_G	0.00019	1	Ref
rs112007582_C	0.00042	1	Ref
rs112007582_T	0.00035	-0.116241	Alt
rs112014751_C	0.00047	1	Ref
rs112014751_G	0.00047	0	Alt
rs112069784_C	0.00266	-0.143985	Alt
rs112069784_G	0.00299	1	Ref
rs11210563_G	0.00036	1	Ref
rs11210563_T	0.00029	-0.12487	Alt
rs11210570_A	0.0003	1	Ref
rs11210570_G	0.00023	-0.134883	Alt
rs11210573_A	0.00034	0.226993	Alt
rs11210573_G	0.00022	1	Ref
rs112116223_C	0.00073	0.0119305	Alt
rs112116223_T	0.00072	1	Ref
rs112189726_A	0.00065	0.161324	Alt
rs112189726_G	0.00053	1	Ref
rs112208963_C	0.0002	1	Ref
rs112208963_T	0.00021	0.0209316	Alt
rs1122510_A	0.00054	1	Ref
rs1122510_G	0.00026	-0.460705	Alt
rs112259028_G	0.00073	1	Ref
rs112259028_T	0.00067	-0.0731094	Alt
rs11230348_G	0.0002	0.0646809	Alt
rs11230348_T	0.00017	1	Ref
rs112310437_C	0.00065	1	Ref
rs112310437_T	0.00097	0.358535	Alt
rs112329101_A	0.00042	1	Ref
rs112329101_G	0.00045	0.0470867	Alt
rs112329502_A	0.00019	-0.0212397	Alt
rs112329502_G	0.0002	1	Ref
rs112371853_A	0.00044	0.218688	Alt
rs112371853_G	0.00031	1	Ref
rs112373899_C	0.00052	1	Ref
rs112373899_T	0.00051	-0.0144378	Alt
rs11239119_A	0.00023	0	Alt
rs11239119_G	0.00023	1	Ref
rs11240298_A	0.00029	-0.0367934	Alt
rs11240298_G	0.00031	1	Ref
rs11240299_A	0.00019	0.0215571	Alt
rs11240299_G	0.00018	1	Ref
rs11240300_A	0.00064	1	Ref
rs11240300_G	0.00051	-0.177281	Alt
rs11240304_C	0.00195	1	Ref
rs11240304_T	0.0018	-0.0917566	Alt
rs11240305_C	0.00053	1	Ref
rs11240305_T	0.00053	0	Alt
rs11242522_C	0.00054	0	Alt
rs11242522_T	0.00054	1	Ref
rs11242523_A	0.00015	-0.04479	Alt
rs11242523_T	0.00017	1	Ref
rs112463474_G	0.00028	1	Ref
rs112463474_T	0.00052	0.393999	Alt
rs11250642_C	0.00025	-0.0195158	Alt
rs11250642_T	0.00026	1	Ref
rs112564482_C	0.00071	0.221536	Alt
rs112564482_G	0.00054	1	Ref
rs112592594_C	0.00035	1	Ref
rs112592594_T	0.00022	-0.24439	Alt
rs112683937_A	0.00033	0.0726718	Alt
rs112683937_G	0.00029	1	Ref
rs112778059_C	0.00038	1	Ref
rs112778059_T	0.00023	-0.275017	Alt
rs112856277_C	0.00043	1	Ref
rs112856277_T	0.00049	0.0917027	Alt
rs112915369_C	0.00025	0.0601832	Alt
rs112915369_T	0.00022	1	Ref
rs113015898_A	0.0002	-0.0415638	Alt
rs113015898_C	0.00022	1	Ref
rs113103441_C	0.00036	1	Ref
rs113103441_T	0.00036	0	Alt
rs113257011_C	0.00044	1	Ref
rs113257011_T	0.00042	-0.0315612	Alt
rs113297581_A	0.00014	-0.0229275	Alt
rs113297581_G	0.00015	1	Ref
rs113321184_A	0.00161	-0.228848	Alt
rs113321184_G	0.00197	1	Ref
rs113409341_C	0.0004	1	Ref
rs113409341_T	0.00039	-0.0164083	Alt
rs113548876_A	0.00069	-0.268296	Alt
rs113548876_G	0.00093	1	Ref
rs113573208_A	0.00107	1	Ref
rs113573208_C	0.00067	-0.429261	Alt
rs113736768_A	0.0002	0.0427968	Alt
rs113736768_G	0.00018	1	Ref
rs113862218_A	0.00041	0.0660194	Alt
rs113862218_T	0.00037	1	Ref
rs113920486_C	0.00014	1	Ref
rs113920486_G	0.00016	0.0454963	Alt
rs113948160_A	0.00101	0.229772	Alt
rs113948160_G	0.00079	1	Ref
rs113955246_C	0.00092	1	Ref
rs113955246_G	0.00101	0.0896214	Alt
rs113978639_A	0.00028	-0.0735988	Alt
rs113978639_G	0.00032	1	Ref
rs113991468_A	0.00036	-0.0169879	Alt
rs113991468_G	0.00037	1	Ref
rs114317986_C	0.00021	1	Ref
rs114317986_T	0.00024	0.061032	Alt
rs114513553_A	0.00021	-0.061032	Alt
rs114513553_G	0.00024	1	Ref
rs114598563_A	0.00034	1	Ref
rs114598563_G	0.00039	0.0849633	Alt
rs1147610_G	0.00089	1	Ref
rs1147610_T	0.00093	0.0413925	Alt
rs114998182_C	0.00033	-0.118982	Alt
rs114998182_G	0.0004	1	Ref
rs115122924_A	0.00029	-0.018514	Alt
rs115122924_G	0.0003	1	Ref
rs115267736_A	0.00043	1	Ref
rs115267736_G	0.00041	-0.0319103	Alt
rs115300972_A	0.00014	-0.0229275	Alt
rs115300972_G	0.00015	1	Ref
rs1154136_A	0.0003	0.018514	Alt
rs1154136_C	0.00029	1	Ref
rs1154140_A	0.00024	0.0200585	Alt
rs1154140_G	0.00023	1	Ref
rs11573113_A	0.00039	0.0675656	Alt
rs11573113_G	0.00035	1	Ref
rs115789286_C	0.00027	1	Ref
rs115789286_G	0.00034	0.128038	Alt
rs11591669_A	0.00026	1	Ref
rs11591669_C	0.00027	0.0192553	Alt
rs11592436_C	0.00024	1	Ref
rs11592436_G	0.00033	0.168983	Alt
rs11592569_A	0.00016	-0.0869021	Alt
rs11592569_C	0.0002	1	Ref
rs11593423_C	0.00018	1	Ref
rs11593423_T	0.00017	-0.0218841	Alt
rs11593437_A	0.00077	1	Ref
rs11593437_T	0.00102	0.262218	Alt
rs11593585_G	0.00013	1	Ref
rs11593585_T	0.00018	0.112899	Alt
rs11593591_A	0.00034	0.0902818	Alt
rs11593591_G	0.00029	1	Ref
rs11594054_C	0.00067	1	Ref
rs11594054_G	0.00071	0.0491489	Alt
rs11595047_C	0.0002	0	Alt
rs11595047_T	0.0002	1	Ref
rs11595335_G	0.0004	0.0330054	Alt
rs11595335_T	0.00038	1	Ref
rs11595472_A	0.00024	-0.133104	Alt
rs11595472_G	0.00031	1	Ref
rs11596551_A	0.00024	-0.0197834	Alt
rs11596551_G	0.00025	1	Ref
rs11596712_A	0.00037	1	Ref
rs11596712_C	0.00031	-0.105064	Alt
rs11596994_A	0.00031	-0.187127	Alt
rs11596994_G	0.00042	1	Ref
rs11597734_A	0.00018	0	Alt
rs11597734_G	0.00018	1	Ref
rs11597961_A	0.00045	0.0793538	Alt
rs11597961_T	0.0004	1	Ref
rs11598774_A	0.00079	-0.140151	Alt
rs11598774_C	0.00092	1	Ref
rs11598916_A	0.00033	0.0726718	Alt
rs11598916_G	0.00029	1	Ref
rs116072255_A	0.00021	0.0209316	Alt
rs116072255_C	0.0002	1	Ref
rs11621703_A	0.00044	0.113624	Alt
rs11621703_G	0.00037	1	Ref
rs11622908_A	0.00025	1	Ref
rs11622908_C	0.00027	0.0387711	Alt
rs11623400_A	0.00015	0	Alt
rs11623400_G	0.00015	1	Ref
rs11624387_G	0.00031	1	Ref
rs11624387_T	0.0003	-0.0182794	Alt
rs11624919_C	0.00048	-0.0148847	Alt
rs11624919_T	0.00049	1	Ref
rs11626502_C	0.00032	0.0363301	Alt
rs11626502_T	0.0003	1	Ref
rs11627143_C	0.00031	1	Ref
rs11627143_G	0.00038	0.121855	Alt
rs11627296_C	0.00017	1	Ref
rs11627296_G	0.00017	0	Alt
rs116394289_C	0.00021	1	Ref
rs116394289_G	0.0002	-0.0209316	Alt
rs116488128_A	0.00045	1	Ref
rs116488128_G	0.00057	0.174335	Alt
rs11649028_A	0.00065	0.0650409	Alt
rs11649028_G	0.0006	1	Ref
rs116502036_C	0.00058	1	Ref
rs116502036_T	0.00057	-0.01362	Alt
rs116504242_A	0.00035	0	Alt
rs116504242_C	0.00035	1	Ref
rs11650428_C	0.00016	1	Ref
rs11650428_G	0.00047	0.566742	Alt
rs116566032_A	0.00527	1.86082	Alt
rs116566032_G	0.0011	1	Ref
rs116884586_A	0.00046	0.0308855	Alt
rs116884586_G	0.00044	1	Ref
rs116951270_C	0.00018	-0.104702	Alt
rs116951270_T	0.00023	1	Ref
rs1169722_A	0.00025	0.0398419	Alt
rs1169722_G	0.00023	1	Ref
rs117022093_C	0.00014	1	Ref
rs117022093_T	0.00017	0.0677175	Alt
rs117023276_A	0.00025	0.0601832	Alt
rs117023276_G	0.00022	1	Ref
rs11715745_A	0.00031	0.0938051	Alt
rs11715745_C	0.00026	1	Ref
rs117196562_A	0.00018	1	Ref
rs117196562_G	0.00019	0.0215571	Alt
rs117202553_A	0.0004	0.191653	Alt
rs117202553_G	0.00029	1	Ref
rs117210812_C	0.00034	1	Ref
rs117210812_T	0.00034	0	Alt
rs11721383_C	0.00065	1	Ref
rs11721383_T	0.00064	-0.0127757	Alt
rs11722195_A	0.0004	0.0839739	Alt
rs11722195_T	0.00035	1	Ref
rs11722732_A	0.00023	-0.0200585	Alt
rs11722732_T	0.00024	1	Ref
rs11723221_A	0.00036	1	Ref
rs11723221_G	0.00035	-0.0171904	Alt
rs11729703_G	0.00022	-0.079699	Alt
rs11729703_T	0.00026	1	Ref
rs11730329_C	0.00018	1	Ref
rs11730329_T	0.0002	0.0427968	Alt
rs11730403_A	0.00054	0.0141545	Alt
rs11730403_C	0.00053	1	Ref
rs117312134_C	0.00016	1	Ref
rs117312134_T	0.00018	0.0441053	Alt
rs11731374_C	0.00038	1	Ref
rs11731374_G	0.00044	0.0968338	Alt
rs11732039_C	0.00016	1	Ref
rs11732039_T	0.00016	0	Alt
rs11733759_C	0.00054	1	Ref
rs11733759_T	0.00084	0.370606	Alt
rs11734428_C	0.0003	1	Ref
rs11734428_T	0.00035	0.0891655	Alt
rs117366037_A	0.00026	1	Ref
rs117366037_G	0.00023	-0.0593577	Alt
rs11737353_A	0.00094	0.183377	Alt
rs11737353_G	0.00077	1	Ref
rs11738191_A	0.00064	1	Ref
rs11738191_G	0.00064	0	Alt
rs11738197_A	0.00066	1	Ref
rs11738197_C	0.00063	-0.0383291	Alt
rs117478716_C	0.00125	-0.00829492	Alt
rs117478716_G	0.00126	1	Ref
rs117547718_C	0.00036	1	Ref
rs117547718_T	0.00053	0.264669	Alt
rs11755054_A	0.00031	1	Ref
rs11755054_T	0.00058	0.422169	Alt
rs11758177_A	0.00048	1	Ref
rs11758177_G	0.00051	0.0442011	Alt
rs117594742_C	0.00035	0	Alt
rs117594742_T	0.00035	1	Ref
rs117597747_C	0.00042	1	Ref
rs117597747_T	0.00036	-0.0990507	Alt
rs11766524_C	0.00022	1	Ref
rs11766524_T	0.00022	0	Alt
rs1176793_C	0.00017	-0.0218841	Alt
rs1176793_T	0.00018	1	Ref
rs1176869_C	0.00022	1	Ref
rs1176869_G	0.00033	0.209382	Alt
rs117694341_C	0.00027	-0.0377564	Alt
rs117694341_T	0.00029	1	Ref
rs1176953_A	0.00022	1	Ref
rs1176953_G	0.00017	-0.106245	Alt
rs1176954_A	0.0007	-0.0596607	Alt
rs1176954_G	0.00075	1	Ref
rs1176992_A	0.00018	-0.12476	Alt
rs1176992_G	0.00024	1	Ref
rs1177864_C	0.0004	1	Ref
rs1177864_G	0.00042	0.0322672	Alt
rs11779068_A	0.00023	-0.741599	Alt
rs11779068_C	0.00071	1	Ref
rs11779086_G	0.00039	1	Ref
rs11779086_T	0.00041	0.0326321	Alt
rs117793142_A	0.00025	-0.218385	Alt
rs117793142_G	0.00037	1	Ref
rs117849444_A	0.00019	1	Ref
rs117849444_G	0.00015	-0.0882312	Alt
rs117967427_C	0.00068	1	Ref
rs117967427_T	0.00084	0.185774	Alt
rs11815041_A	0.0007	1	Ref
rs11815041_G	0.00053	-0.223559	Alt
rs11816084_A	0.00167	1.30106	Alt
rs11816084_C	0.00039	1	Ref
rs11816709_G	0.00025	1	Ref
rs11816709_T	0.00027	0.0387711	Alt
rs11844124_A	0.00023	-0.153163	Alt
rs11844124_G	0.00031	1	Ref
rs11846693_C	0.00041	-0.0160434	Alt
rs11846693_G	0.00042	1	Ref
rs11851426_A	0.00014	0.0232977	Alt
rs11851426_C	0.00013	1	Ref
rs11852724_A	0.0002	-0.0819636	Alt
rs11852724_G	0.00024	1	Ref
rs11872184_A	0.00082	-0.021955	Alt
rs11872184_G	0.00084	1	Ref
rs11876511_A	0.00016	1	Ref
rs11876511_G	0.0002	0.0869021	Alt
rs11886179_C	0.00044	1	Ref
rs11886179_T	0.00027	-0.293238	Alt
rs11887422_C	0.00024	1	Ref
rs11887422_G	0.00025	0.0197834	Alt
rs11887729_G	0.00046	1	Ref
rs11887729_T	0.00048	0.0302382	Alt
rs11888302_A	0.00042	1	Ref
rs11888302_G	0.00036	-0.0990507	Alt
rs11895588_G	0.00039	1	Ref
rs11895588_T	0.00032	-0.120401	Alt
rs11900941_C	0.00019	1	Ref
rs11900941_T	0.00023	0.0831448	Alt
rs11902033_A	0.0003	-0.0363301	Alt
rs11902033_G	0.00032	1	Ref
rs11902930_A	0.00021	-0.0808154	Alt
rs11902930_G	0.00025	1	Ref
rs11904437_A	0.00033	1	Ref
rs11904437_C	0.00159	1.34904	Alt
rs11916620_A	0.00022	0.0628035	Alt
rs11916620_T	0.00019	1	Ref
rs11917412_A	0.00056	1	Ref
rs11917412_T	0.0006	0.05423	Alt
rs11921202_A	0.00029	0.0187547	Alt
rs11921202_T	0.00028	1	Ref
rs11921435_A	0.00016	1	Ref
rs11921435_T	0.00018	0.0441053	Alt
rs11929843_A	0.00072	1	Ref
rs11929843_G	0.00101	0.311285	Alt
rs11930954_C	0.00026	0	Alt
rs11930954_T	0.00026	1	Ref
rs11931007_A	0.00057	0.303485	Alt
rs11931007_T	0.00037	1	Ref
rs11931623_A	0.00027	1	Ref
rs11931623_G	0.00027	0	Alt
rs11935933_A	0.00077	-1.28399	Alt
rs11935933_G	0.00257	1	Ref
rs11937191_G	0.00018	-0.0215571	Alt
rs11937191_T	0.00019	1	Ref
rs11941013_A	0.00017	0.04479	Alt
rs11941013_T	0.00015	1	Ref
rs11942607_A	0.00073	0.111102	Alt
rs11942607_G	0.00064	1	Ref
rs11969816_A	0.00024	0.0200585	Alt
rs11969816_G	0.00023	1	Ref
rs11990740_A	0.00024	-0.0963109	Alt
rs11990740_G	0.00029	1	Ref
rs11991955_C	0.00023	-0.0976147	Alt
rs11991955_T	0.00028	1	Ref
rs11994338_A	0.00053	1	Ref
rs11994338_G	0.00034	-0.299257	Alt
rs11994423_G	0.00169	-0.0392727	Alt
rs11994423_T	0.00175	1	Ref
rs11994454_C	0.00031	-0.105064	Alt
rs11994454_T	0.00037	1	Ref
rs11994487_A	0.0002	-0.0415638	Alt
rs11994487_T	0.00022	1	Ref
rs11997856_A	0.00039	1	Ref
rs11997856_G	0.00033	-0.102573	Alt
rs12002114_C	0.00022	1	Ref
rs12002114_G	0.0002	-0.0415638	Alt
rs12002155_C	0.00038	1	Ref
rs12002155_G	0.00034	-0.0683662	Alt
rs12002165_A	0.00057	0.0991197	Alt
rs12002165_G	0.0005	1	Ref
rs12034439_G	0.00021	-0.0409735	Alt
rs12034439_T	0.00023	1	Ref
rs12041198_A	0.00317	0.371707	Alt
rs12041198_T	0.00234	1	Ref
rs12042133_A	0.00027	-0.0377564	Alt
rs12042133_C	0.00029	1	Ref
rs12044054_A	0.00066	1	Ref
rs12044054_G	0.00069	0.0373371	Alt
rs12047221_A	0.00031	-0.0880764	Alt
rs12047221_G	0.00036	1	Ref
rs12047348_A	0.00112	0.366621	Alt
rs12047348_G	0.00076	1	Ref
rs12050084_A	0.00026	-0.264889	Alt
rs12050084_C	0.00041	1	Ref
rs12072230_C	0.0002	0.109471	Alt
rs12072230_T	0.00015	1	Ref
rs12102248_A	0.00118	1	Ref
rs12102248_C	0.00126	0.0677344	Alt
rs12102293_C	0.00063	0.269716	Alt
rs12102293_T	0.00044	1	Ref
rs12102691_G	0.00039	1	Ref
rs12102691_T	0.00038	-0.0165971	Alt
rs12102728_C	0.00021	1	Ref
rs12102728_T	0.00025	0.0808154	Alt
rs12102958_A	0.00076	-0.0343718	Alt
rs12102958_T	0.00079	1	Ref
rs12103301_A	0.00019	1	Ref
rs12103301_C	0.00018	-0.0215571	Alt
rs12103303_A	0.00029	1	Ref
rs12103303_G	0.00093	0.869161	Alt
rs12103358_C	0.0005	0	Alt
rs12103358_G	0.0005	1	Ref
rs12103403_A	0.00012	-0.0699054	Alt
rs12103403_C	0.00015	1	Ref
rs12108312_A	0.00022	1	Ref
rs12108312_G	0.0002	-0.0415638	Alt
rs12110284_C	0.00037	1	Ref
rs12110284_T	0.00052	0.233387	Alt
rs12113053_G	0.00029	-0.672759	Alt
rs12113053_T	0.00075	1	Ref
rs12113054_G	0.00096	0.226685	Alt
rs12113054_T	0.00075	1	Ref
rs12113501_A	0.00025	-0.284405	Alt
rs12113501_G	0.00041	1	Ref
rs12146332_C	0.00029	1	Ref
rs12146332_T	0.00027	-0.0377564	Alt
rs12147169_A	0.00032	-0.34885	Alt
rs12147169_G	0.00054	1	Ref
rs12147567_A	0.00019	-0.0628035	Alt
rs12147567_G	0.00022	1	Ref
rs12150130_C	0.00023	1	Ref
rs12150130_T	0.00022	-0.0203413	Alt
rs12152914_A	0.00033	1	Ref
rs12152914_C	0.00063	0.452526	Alt
rs12174426_G	0.00035	-0.116241	Alt
rs12174426_T	0.00042	1	Ref
rs12175251_A	0.00016	1	Ref
rs12175251_G	0.00018	0.0441053	Alt
rs1217736_A	0.00029	1	Ref
rs1217736_G	0.00027	-0.0377564	Alt
rs1217750_A	0.00056	0.100103	Alt
rs1217750_G	0.00049	1	Ref
rs1217752_A	0.00032	1	Ref
rs1217752_T	0.00026	-0.111856	Alt
rs1217753_C	0.00026	1	Ref
rs1217753_G	0.00025	-0.0195158	Alt
rs12187898_A	0.00039	0	Alt
rs12187898_C	0.00039	1	Ref
rs12187903_C	0.0002	1	Ref
rs12187903_T	0.00024	0.0819636	Alt
rs12193434_C	0.00035	0.0173977	Alt
rs12193434_T	0.00034	1	Ref
rs12219100_C	0.00032	0.0180507	Alt
rs12219100_T	0.00031	1	Ref
rs12235141_A	0.00053	1	Ref
rs12235141_G	0.00059	0.082916	Alt
rs12265349_G	0.00023	1	Ref
rs12265349_T	0.00025	0.0398419	Alt
rs12274840_A	0.00038	1	Ref
rs12274840_G	0.00031	-0.121855	Alt
rs12321716_C	0.00029	1	Ref
rs12321716_G	0.00033	0.0726718	Alt
rs12331312_G	0.00033	0.360417	Alt
rs12331312_T	0.00015	1	Ref
rs12335806_A	0.00019	1	Ref
rs12335806_C	0.00026	0.142502	Alt
rs12337214_C	0.00061	1	Ref
rs12337214_G	0.00018	-0.720139	Alt
rs12339568_A	0.00023	0.0409735	Alt
rs12339568_T	0.00021	1	Ref
rs12343160_A	0.00028	0.0577728	Alt
rs12343160_T	0.00025	1	Ref
rs12343205_A	0.00024	-0.0197834	Alt
rs12343205_T	0.00025	1	Ref
rs12343602_C	0.00032	1	Ref
rs12343602_G	0.00036	0.0700257	Alt
rs12345126_G	0.00018	0	Alt
rs12345126_T	0.00018	1	Ref
rs12347412_A	0.00027	1	Ref
rs12347412_G	0.00027	0	Alt
rs12348119_A	0.00028	0.138588	Alt
rs12348119_C	0.00021	1	Ref
rs12348828_A	0.00026	1	Ref
rs12348828_G	0.00023	-0.0593577	Alt
rs12348979_A	0.00072	1	Ref
rs12348979_G	0.00065	-0.0863958	Alt
rs12351765_C	0.00038	1	Ref
rs12351765_T	0.00037	-0.0167902	Alt
rs12352095_G	0.00022	1	Ref
rs12352095_T	0.00024	0.0403998	Alt
rs12352337_C	0.00032	0.254358	Alt
rs12352337_T	0.00019	1	Ref
rs12353026_G	0.00013	1	Ref
rs12353026_T	0.00015	0.0462252	Alt
rs12357784_C	0.00024	1	Ref
rs12357784_T	0.00026	0.0392992	Alt
rs12357853_A	0.00092	0.0311552	Alt
rs12357853_G	0.00089	1	Ref
rs12372613_A	0.0002	1	Ref
rs12372613_G	0.0002	0	Alt
rs12401710_A	0.00018	1	Ref
rs12401710_G	0.00023	0.104702	Alt
rs12405099_C	0.00012	1	Ref
rs12405099_T	0.00013	0.0236802	Alt
rs12405378_C	0.00025	1	Ref
rs12405378_T	0.00027	0.0387711	Alt
rs12405381_C	0.0002	1	Ref
rs12405381_T	0.00015	-0.109471	Alt
rs12410154_G	0.00081	1	Ref
rs12410154_T	0.00071	-0.116011	Alt
rs12432418_G	0.00047	1	Ref
rs12432418_T	0.00037	-0.159708	Alt
rs12432561_A	0.00023	-0.134883	Alt
rs12432561_G	0.0003	1	Ref
rs12433000_C	0.00077	0.145086	Alt
rs12433000_T	0.00065	1	Ref
rs12435016_A	0.00017	1	Ref
rs12435016_C	0.00015	-0.04479	Alt
rs12435477_G	0.00053	1	Ref
rs12435477_T	0.00054	0.0141545	Alt
rs12438959_A	0.00086	-0.162242	Alt
rs12438959_G	0.00102	1	Ref
rs12442246_A	0.00017	1	Ref
rs12442246_G	0.00017	0	Alt
rs1245314_A	0.00029	1	Ref
rs1245314_G	0.00028	-0.0187547	Alt
rs1245320_G	0.0005	0.0598556	Alt
rs1245320_T	0.00046	1	Ref
rs12501681_A	0.0003	-0.283052	Alt
rs12501681_G	0.00047	1	Ref
rs12505591_A	0.00016	0	Alt
rs12505591_G	0.00016	1	Ref
rs12507613_A	0.00069	0.128409	Alt
rs12507613_G	0.00059	1	Ref
rs12507708_A	0.00018	1	Ref
rs12507708_G	0.00017	-0.0218841	Alt
rs12509281_A	0.0002	1	Ref
rs12509281_G	0.00019	-0.0212397	Alt
rs12509972_A	0.00029	0.0963109	Alt
rs12509972_C	0.00024	1	Ref
rs12512082_A	0.00068	0	Alt
rs12512082_G	0.00068	1	Ref
rs12512210_A	0.00013	1	Ref
rs12512210_G	0.00012	-0.0236802	Alt
rs12513233_A	0.0003	0.0372687	Alt
rs12513233_G	0.00028	1	Ref
rs12515429_C	0.00023	1	Ref
rs12515429_T	0.00022	-0.0203413	Alt
rs12519770_A	0.00025	1	Ref
rs12519770_G	0.0003	0.0950415	Alt
rs12572135_C	0.00016	1	Ref
rs12572135_T	0.00019	0.0656624	Alt
rs12586894_C	0.00053	0	Alt
rs12586894_T	0.00053	1	Ref
rs12587119_A	0.00037	1	Ref
rs12587119_G	0.00036	-0.0169879	Alt
rs12590189_A	0.00017	1	Ref
rs12590189_C	0.00018	0.0218841	Alt
rs12591598_A	0.00053	-0.0281715	Alt
rs12591598_C	0.00055	1	Ref
rs12612849_C	0.00038	1	Ref
rs12612849_T	0.00056	0.272945	Alt
rs12618591_A	0.00045	1	Ref
rs12618591_G	0.00049	0.060483	Alt
rs12623196_A	0.00024	0.0403998	Alt
rs12623196_G	0.00022	1	Ref
rs12632827_C	0.00029	1	Ref
rs12632827_T	0.00034	0.0902818	Alt
rs12634739_A	0.00156	-0.014046	Alt
rs12634739_G	0.00158	1	Ref
rs12640173_A	0.00035	-0.0341783	Alt
rs12640173_C	0.00037	1	Ref
rs12640583_A	0.00038	-0.0165971	Alt
rs12640583_G	0.00039	1	Ref
rs12640653_C	0.00027	1	Ref
rs12640653_T	0.00023	-0.078613	Alt
rs12642898_A	0.00109	0.316382	Alt
rs12642898_G	0.00078	1	Ref
rs1264297_A	0.00025	1	Ref
rs1264297_C	0.00022	-0.0601832	Alt
rs1264298_A	0.00023	1	Ref
rs1264298_G	0.00023	0	Alt
rs1264299_C	0.00024	1	Ref
rs1264299_T	0.00026	0.0392992	Alt
rs1264300_A	0.00025	1	Ref
rs1264300_G	0.00027	0.0387711	Alt
rs1264301_G	0.00027	1	Ref
rs1264301_T	0.00018	-0.183315	Alt
rs1264302_C	0.00047	1	Ref
rs1264302_T	0.00035	-0.193886	Alt
rs1264303_A	0.00033	1	Ref
rs1264303_G	0.00046	0.213696	Alt
rs1264307_A	0.00051	0.136886	Alt
rs1264307_G	0.00042	1	Ref
rs1264309_A	0.00027	1	Ref
rs1264309_G	0.00029	0.0377564	Alt
rs1264311_A	0.00017	0.0222212	Alt
rs1264311_G	0.00016	1	Ref
rs1264315_C	0.00126	1	Ref
rs1264315_T	0.00099	-0.242625	Alt
rs1264317_C	0.00018	1	Ref
rs1264317_T	0.0002	0.0427968	Alt
rs1264320_C	0.00031	1	Ref
rs1264320_T	0.00034	0.0534884	Alt
rs1264327_A	0.00033	0.0541578	Alt
rs1264327_G	0.0003	1	Ref
rs1264329_A	0.00025	0.101747	Alt
rs1264329_G	0.0002	1	Ref
rs1264331_A	0.00019	-0.0212397	Alt
rs1264331_G	0.0002	1	Ref
rs1264332_C	0.00018	-0.104702	Alt
rs1264332_G	0.00023	1	Ref
rs1264333_C	0.00036	-0.0503753	Alt
rs1264333_T	0.00039	1	Ref
rs1264334_A	0.00054	0.0284493	Alt
rs1264334_G	0.00052	1	Ref
rs1264342_A	0.00064	0	Alt
rs1264342_C	0.00064	1	Ref
rs1264343_C	0.00034	1	Ref
rs1264343_G	0.00042	0.133639	Alt
rs1264344_C	0.00031	1	Ref
rs1264344_T	0.00028	-0.0555481	Alt
rs1264345_A	0.00025	0.101747	Alt
rs1264345_G	0.0002	1	Ref
rs12643573_A	0.00027	1	Ref
rs12643573_T	0.00026	-0.0192553	Alt
rs12646871_A	0.00057	0.0558034	Alt
rs12646871_G	0.00053	1	Ref
rs12649822_A	0.00036	1	Ref
rs12649822_G	0.00036	0	Alt
rs12650649_C	0.00039	1	Ref
rs12650649_T	0.0004	0.0164083	Alt
rs12651813_A	0.0002	-0.0415638	Alt
rs12651813_G	0.00022	1	Ref
rs12653864_A	0.00016	1	Ref
rs12653864_C	0.00019	0.0656624	Alt
rs12657123_A	0.00018	-0.0215571	Alt
rs12657123_T	0.00019	1	Ref
rs12657531_A	0.00251	1	Ref
rs12657531_G	0.0022	-0.157675	Alt
rs12657546_A	0.00033	-0.135205	Alt
rs12657546_C	0.00041	1	Ref
rs12658007_A	0.00036	1	Ref
rs12658007_G	0.00027	-0.162626	Alt
rs12658276_A	0.00021	1	Ref
rs12658276_G	0.00023	0.0409735	Alt
rs12658451_C	0.00023	-0.0976147	Alt
rs12658451_T	0.00028	1	Ref
rs12659965_A	0.0002	-0.0209316	Alt
rs12659965_G	0.00021	1	Ref
rs12660959_A	0.00019	-0.0212397	Alt
rs12660959_T	0.0002	1	Ref
rs12661295_A	0.00019	1	Ref
rs12661295_G	0.00016	-0.0656624	Alt
rs12666259_A	0.0003	1	Ref
rs12666259_G	0.00027	-0.0562704	Alt
rs12674799_A	0.00024	0.061032	Alt
rs12674799_T	0.00021	1	Ref
rs12696092_A	0.0002	-0.140518	Alt
rs12696092_G	0.00027	1	Ref
rs12700796_A	0.00058	-0.0532294	Alt
rs12700796_T	0.00062	1	Ref
rs12711961_A	0.00031	1	Ref
rs12711961_G	0.00029	-0.0367934	Alt
rs12716908_C	0.00023	0.0409735	Alt
rs12716908_T	0.00021	1	Ref
rs12716944_A	0.00027	0.119587	Alt
rs12716944_C	0.00021	1	Ref
rs12871588_A	0.00026	1	Ref
rs12871588_G	0.00022	-0.079699	Alt
rs12877787_C	0.00036	1	Ref
rs12877787_T	0.0004	0.0667836	Alt
rs12878241_A	0.00028	1	Ref
rs12878241_G	0.00021	-0.138588	Alt
rs12878534_A	0.00017	1	Ref
rs12878534_T	0.00018	0.0218841	Alt
rs12878664_G	0.00017	1	Ref
rs12878664_T	0.00028	0.224201	Alt
rs12878770_A	0.00021	-0.194136	Alt
rs12878770_G	0.00031	1	Ref
rs12878879_A	0.00034	1	Ref
rs12878879_G	0.00033	-0.01761	Alt
rs12879345_A	0.00059	-0.0784085	Alt
rs12879345_T	0.00065	1	Ref
rs12881888_A	0.00036	-0.130612	Alt
rs12881888_G	0.00044	1	Ref
rs12882534_A	0.00024	1	Ref
rs12882534_G	0.00023	-0.0200585	Alt
rs12882717_A	0.00035	1	Ref
rs12882717_G	0.00025	-0.184207	Alt
rs12885158_C	0.00038	1	Ref
rs12885158_G	0.00042	0.0652726	Alt
rs12886183_C	0.00017	1	Ref
rs12886183_G	0.00015	-0.04479	Alt
rs12888666_C	0.00023	1	Ref
rs12888666_T	0.00021	-0.0409735	Alt
rs12892744_C	0.00021	1	Ref
rs12892744_G	0.00019	-0.0421713	Alt
rs12893091_A	0.00075	-0.10154	Alt
rs12893091_G	0.00084	1	Ref
rs12894641_A	0.00054	1	Ref
rs12894641_G	0.00048	-0.0870882	Alt
rs12894714_A	0.00021	-0.0808154	Alt
rs12894714_G	0.00025	1	Ref
rs12895038_G	0.00022	1	Ref
rs12895038_T	0.00018	-0.0843606	Alt
rs12897559_A	0.00029	1	Ref
rs12897559_G	0.00026	-0.0570117	Alt
rs12901895_C	0.00161	1	Ref
rs12901895_G	0.00122	-0.297296	Alt
rs12906690_C	0.00019	1	Ref
rs12906690_G	0.0002	0.0212397	Alt
rs12909503_C	0.00089	-1.74745	Alt
rs12909503_T	0.00413	1	Ref
rs12910996_C	0.00066	1	Ref
rs12910996_T	0.00066	0	Alt
rs12911382_A	0.00064	0.0927454	Alt
rs12911382_G	0.00057	1	Ref
rs12915890_C	0.00025	1	Ref
rs12915890_G	0.00016	-0.188649	Alt
rs12917469_A	0.00024	1	Ref
rs12917469_G	0.00051	0.457118	Alt
rs12920477_C	0.00051	1	Ref
rs12920477_T	0.00048	-0.0442011	Alt
rs12920484_C	0.00027	1	Ref
rs12920484_T	0.00026	-0.0192553	Alt
rs12927083_G	0.0014	1	Ref
rs12927083_T	0.00154	0.103397	Alt
rs12933781_A	0.0004	0.118982	Alt
rs12933781_T	0.00033	1	Ref
rs12942682_A	0.00072	-0.395663	Alt
rs12942682_G	0.0011	1	Ref
rs12943640_A	0.00029	0.0570117	Alt
rs12943640_G	0.00026	1	Ref
rs12987800_C	0.00046	0.0784902	Alt
rs12987800_T	0.00041	1	Ref
rs13011467_A	0.00083	0.102341	Alt
rs13011467_G	0.00074	1	Ref
rs13035160_A	0.00022	0	Alt
rs13035160_G	0.00022	1	Ref
rs13061579_C	0.00036	1	Ref
rs13061579_T	0.00032	-0.0700257	Alt
rs13061619_A	0.00014	-0.400955	Alt
rs13061619_G	0.00034	1	Ref
rs13063797_A	0.00037	-0.129149	Alt
rs13063797_G	0.00045	1	Ref
rs13065596_G	0.00025	1	Ref
rs13065596_T	0.00021	-0.0808154	Alt
rs13065679_C	0.00033	0.0726718	Alt
rs13065679_T	0.00029	1	Ref
rs13067585_C	0.0002	-0.178274	Alt
rs13067585_T	0.00029	1	Ref
rs13075790_C	0.00117	1	Ref
rs13075790_T	0.00121	0.0344694	Alt
rs13077258_C	0.00029	0.0377564	Alt
rs13077258_G	0.00027	1	Ref
rs13078786_A	0.00037	0.0169879	Alt
rs13078786_G	0.00036	1	Ref
rs13080892_A	0.00027	0.140518	Alt
rs13080892_T	0.0002	1	Ref
rs13082502_A	0.00039	-0.0326321	Alt
rs13082502_G	0.00041	1	Ref
rs13083138_A	0.00027	1	Ref
rs13083138_G	0.00027	0	Alt
rs13083887_G	0.0004	0.210408	Alt
rs13083887_T	0.00028	1	Ref
rs13085008_C	0.00051	1	Ref
rs13085008_T	0.00056	0.0707862	Alt
rs13085667_A	0.00018	1	Ref
rs13085667_T	0.0002	0.0427968	Alt
rs13085824_A	0.00021	0	Alt
rs13085824_T	0.00021	1	Ref
rs13088547_C	0.00025	1	Ref
rs13088547_T	0.00028	0.0577728	Alt
rs13094534_A	0.00022	-0.0203413	Alt
rs13094534_G	0.00023	1	Ref
rs13095658_A	0.00118	1	Ref
rs13095658_G	0.00081	-0.362754	Alt
rs13096384_A	0.00054	-0.0687615	Alt
rs13096384_G	0.00059	1	Ref
rs13096467_A	0.00031	0.0555481	Alt
rs13096467_G	0.00028	1	Ref
rs13102150_A	0.00018	0.0666741	Alt
rs13102150_C	0.00015	1	Ref
rs13104147_A	0.00042	0.116241	Alt
rs13104147_T	0.00035	1	Ref
rs13106889_A	0.00033	0.129683	Alt
rs13106889_T	0.00026	1	Ref
rs13107432_A	0.00017	1	Ref
rs13107432_G	0.00024	0.146644	Alt
rs13109582_C	0.00023	1	Ref
rs13109582_T	0.00024	0.0200585	Alt
rs13111482_A	0.00076	0.0233781	Alt
rs13111482_G	0.00074	1	Ref
rs13111807_A	0.00021	-0.0409735	Alt
rs13111807_T	0.00023	1	Ref
rs13111829_A	0.00017	0	Alt
rs13111829_T	0.00017	1	Ref
rs13118787_A	0.00053	1	Ref
rs13118787_G	0.00039	-0.214294	Alt
rs13121334_A	0.00023	-0.134883	Alt
rs13121334_G	0.0003	1	Ref
rs13122457_C	0.00017	-0.0856125	Alt
rs13122457_G	0.00021	1	Ref
rs13124454_A	0.0003	0.018514	Alt
rs13124454_G	0.00029	1	Ref
rs13129350_G	0.00024	1	Ref
rs13129350_T	0.00031	0.133104	Alt
rs13129897_A	0.00041	1	Ref
rs13129897_G	0.00045	0.06313	Alt
rs13131841_A	0.00044	-0.0760084	Alt
rs13131841_C	0.00049	1	Ref
rs13131896_A	0.00034	-0.0173977	Alt
rs13131896_G	0.00035	1	Ref
rs13135042_A	0.00029	1	Ref
rs13135042_G	0.00041	0.207877	Alt
rs13136545_C	0.00024	1	Ref
rs13136545_T	0.00053	0.48585	Alt
rs13137003_C	0.0002	1	Ref
rs13137003_T	0.00021	0.0209316	Alt
rs13140165_G	0.00021	0.0209316	Alt
rs13140165_T	0.0002	1	Ref
rs13140906_C	0.00051	0.0145838	Alt
rs13140906_T	0.0005	1	Ref
rs13141617_G	0.00027	0.0192553	Alt
rs13141617_T	0.00026	1	Ref
rs13142243_C	0.00037	0	Alt
rs13142243_T	0.00037	1	Ref
rs13145902_A	0.00016	0	Alt
rs13145902_C	0.00016	1	Ref
rs13150610_G	0.00016	1	Ref
rs13150610_T	0.00015	-0.0225688	Alt
rs13151026_G	0.00023	0	Alt
rs13151026_T	0.00023	1	Ref
rs13153908_C	0.00029	-0.0726718	Alt
rs13153908_T	0.00033	1	Ref
rs13158494_G	0.00112	-0.0178747	Alt
rs13158494_T	0.00114	1	Ref
rs13164188_C	0.00035	0.24439	Alt
rs13164188_T	0.00022	1	Ref
rs13172611_C	0.00068	1	Ref
rs13172611_T	0.00035	-0.480846	Alt
rs13177365_A	0.00029	0.0377564	Alt
rs13177365_G	0.00027	1	Ref
rs1317835_A	0.00045	1	Ref
rs1317835_G	0.00039	-0.0957621	Alt
rs13180552_C	0.00041	0.473054	Alt
rs13180552_T	0.00016	1	Ref
rs13184723_A	0.00061	-0.126162	Alt
rs13184723_C	0.00071	1	Ref
rs13188479_A	0.00028	1	Ref
rs13188479_G	0.00029	0.0187547	Alt
rs13193063_C	0.00027	-0.162626	Alt
rs13193063_T	0.00036	1	Ref
rs13194647_A	0.00025	1	Ref
rs13194647_C	0.00024	-0.0197834	Alt
rs13195962_G	0.00025	1	Ref
rs13195962_T	0.00025	0	Alt
rs13202158_A	0.00085	0.0439125	Alt
rs13202158_G	0.00081	1	Ref
rs13211725_C	0.00075	1	Ref
rs13211725_G	0.00077	0.0231902	Alt
rs13215471_G	0.00047	0.0151983	Alt
rs13215471_T	0.00046	1	Ref
rs13221828_A	0.0002	0.109471	Alt
rs13221828_C	0.00015	1	Ref
rs1325504_A	0.00041	1	Ref
rs1325504_T	0.00029	-0.207877	Alt
rs1326708_A	0.00033	1	Ref
rs1326708_G	0.00036	0.0521981	Alt
rs1327711_A	0.00021	1	Ref
rs1327711_G	0.00043	0.39713	Alt
rs1327727_C	0.00019	1	Ref
rs1327727_T	0.00022	0.0628035	Alt
rs13302881_A	0.00016	-0.0222212	Alt
rs13302881_C	0.00017	1	Ref
rs13353396_A	0.00026	0.0593577	Alt
rs13353396_T	0.00023	1	Ref
rs13353548_G	0.00018	1	Ref
rs13353548_T	0.00017	-0.0218841	Alt
rs13353589_C	0.00122	1	Ref
rs13353589_T	0.00174	0.384181	Alt
rs13357251_C	0.00022	-0.0203413	Alt
rs13357251_G	0.00023	1	Ref
rs13357786_A	0.00022	0.0628035	Alt
rs13357786_G	0.00019	1	Ref
rs13357845_A	0.00067	1	Ref
rs13357845_G	0.00062	-0.0638886	Alt
rs13357862_C	0.00053	1	Ref
rs13357862_T	0.00053	0	Alt
rs13360205_A	0.00142	1	Ref
rs13360205_G	0.00166	0.17125	Alt
rs13378132_C	0.00147	1	Ref
rs13378132_T	0.00121	-0.205968	Alt
rs13382273_A	0.00031	-0.0180507	Alt
rs13382273_G	0.00032	1	Ref
rs13383006_C	0.00029	1	Ref
rs13383006_T	0.00035	0.107679	Alt
rs13384087_C	0.00027	1	Ref
rs13384087_T	0.00027	0	Alt
rs13386758_A	0.00049	0.0148847	Alt
rs13386758_C	0.00048	1	Ref
rs13386955_A	0.00017	1	Ref
rs13386955_G	0.00028	0.224201	Alt
rs13387442_C	0.00034	1	Ref
rs13387442_T	0.00049	0.241208	Alt
rs13389472_C	0.0002	-0.0209316	Alt
rs13389472_T	0.00021	1	Ref
rs13390546_A	0.00031	0.0182794	Alt
rs13390546_C	0.0003	1	Ref
rs1339268_A	0.00047	1	Ref
rs1339268_G	0.00054	0.102128	Alt
rs13397930_A	0.00338	1	Ref
rs13397930_T	0.00336	-0.00748626	Alt
rs13400849_C	0.00065	1	Ref
rs13400849_T	0.00116	0.535689	Alt
rs13403742_A	0.00072	1	Ref
rs13403742_G	0.00069	-0.0363951	Alt
rs13404058_A	0.00022	1	Ref
rs13404058_G	0.00023	0.0203413	Alt
rs13404900_C	0.00065	1	Ref
rs13404900_T	0.00057	-0.105521	Alt
rs13405535_C	0.00042	0.0160434	Alt
rs13405535_G	0.00041	1	Ref
rs13406425_C	0.00035	1	Ref
rs13406425_T	0.00035	0	Alt
rs13407048_C	0.00021	0	Alt
rs13407048_T	0.00021	1	Ref
rs13408052_A	0.00064	0.148549	Alt
rs13408052_G	0.00053	1	Ref
rs13408263_A	0.00035	0.126434	Alt
rs13408263_G	0.00028	1	Ref
rs13408288_C	0.00112	1	Ref
rs13408288_G	0.00078	-0.343616	Alt
rs13408414_C	0.00055	1	Ref
rs13408414_T	0.00052	-0.0424662	Alt
rs13408883_A	0.00032	0.0735988	Alt
rs13408883_G	0.00028	1	Ref
rs13410276_A	0.00032	1	Ref
rs13410276_G	0.00034	0.0354377	Alt
rs13411840_A	0.00082	1	Ref
rs13411840_C	0.00208	0.975313	Alt
rs13415315_A	0.00158	0.495454	Alt
rs13415315_G	0.00098	1	Ref
rs13415838_G	0.00021	1	Ref
rs13415838_T	0.00022	0.0206322	Alt
rs1342209_C	0.00029	-0.0726718	Alt
rs1342209_T	0.00033	1	Ref
rs1342210_A	0.00018	1	Ref
rs1342210_G	0.00022	0.0843606	Alt
rs13427627_A	0.00031	1	Ref
rs13427627_G	0.00031	0	Alt
rs13427718_C	0.00043	0.0319103	Alt
rs13427718_T	0.00041	1	Ref
rs13432405_C	0.00024	1	Ref
rs13432405_G	0.00021	-0.061032	Alt
rs13434948_C	0.00025	1	Ref
rs13434948_T	0.00032	0.131372	Alt
rs13435039_G	0.00024	1	Ref
rs13435039_T	0.0002	-0.0819636	Alt
rs13435131_A	0.00076	-0.0230053	Alt
rs13435131_C	0.00078	1	Ref
rs13435138_A	0.00018	0	Alt
rs13435138_C	0.00018	1	Ref
rs13435336_A	0.00033	-0.069186	Alt
rs13435336_T	0.00037	1	Ref
rs13435545_A	0.00023	-0.0398419	Alt
rs13435545_T	0.00025	1	Ref
rs13437574_A	0.00027	0.0192553	Alt
rs13437574_T	0.00026	1	Ref
rs1349124_A	0.0003	1	Ref
rs1349124_G	0.00033	0.0541578	Alt
rs1350404_C	0.00013	1	Ref
rs1350404_T	0.00014	0.0232977	Alt
rs1350941_A	0.00036	0.034588	Alt
rs1350941_C	0.00034	1	Ref
rs1352834_A	0.00054	1	Ref
rs1352834_G	0.00055	0.014017	Alt
rs1352836_C	0.00032	-0.362867	Alt
rs1352836_T	0.00055	1	Ref
rs1361452_A	0.0004	-0.0793538	Alt
rs1361452_C	0.00045	1	Ref
rs1363099_A	0.00028	-0.0735988	Alt
rs1363099_C	0.00032	1	Ref
rs1363101_G	0.00028	-0.0555481	Alt
rs1363101_T	0.00031	1	Ref
rs1363102_G	0.00014	1	Ref
rs1363102_T	0.00016	0.0454963	Alt
rs1363103_C	0.00029	0.136711	Alt
rs1363103_T	0.00022	1	Ref
rs1363104_C	0.00044	1	Ref
rs1363104_G	0.00038	-0.0968338	Alt
rs1363105_C	0.00046	1	Ref
rs1363105_T	0.00067	0.289713	Alt
rs1363106_A	0.00029	1	Ref
rs1363106_T	0.00028	-0.0187547	Alt
rs1367194_C	0.00024	1	Ref
rs1367194_T	0.00025	0.0197834	Alt
rs1367197_C	0.00018	1	Ref
rs1367197_G	0.00014	-0.0896016	Alt
rs1371475_A	0.00041	1	Ref
rs1371475_G	0.00052	0.167367	Alt
rs1371476_C	0.00024	1	Ref
rs1371476_G	0.00023	-0.0200585	Alt
rs1371477_C	0.00031	1	Ref
rs1371477_T	0.00031	0	Alt
rs1372356_A	0.00024	-0.0775562	Alt
rs1372356_G	0.00028	1	Ref
rs1372361_C	0.0003	1	Ref
rs1372361_T	0.00047	0.283052	Alt
rs1379134_C	0.00016	-0.208165	Alt
rs1379134_T	0.00026	1	Ref
rs137974539_A	0.00074	0.1752	Alt
rs137974539_T	0.0006	1	Ref
rs138466776_A	0.00053	-0.0281715	Alt
rs138466776_C	0.00055	1	Ref
rs138604319_A	0.00021	1	Ref
rs138604319_C	0.0002	-0.0209316	Alt
rs138741144_A	0.00021	0.0209316	Alt
[truncated: 4,693 more rows]

## Sheet: HOMER_Created_motifs
rs828005_Non-Ref_A	-8	ATGACTCACA	AP-1	bZIP	/ThioMac-PU.1-ChIP-Seq	8.62048	828005	828005_AP-1(bZIP)/ThioMac-PU.1-ChIP-Seq(GSE21512)/Homer	bZIP
[truncated: 599 more rows]

[truncated: 1 more sheets: HOMER_Disrupted_motifs]
