# Supplementary material for: Global Evaluation of Congenital Heart Disease-Associated Non-Coding Variants
Source: bioRxiv preprint, doi:10.64898/2025.12.02.691900, version 2 (2025-12-10)
Supplement: Supplemental Data 2 [file 691900_file03.xlsx]

## Sheet: Readme
Sheet_name	Description
Performance_parameters	traning parameters of MinSeqChIP, LS-GKM-VM, and MEME with SNP Bind-n-Seq Ki values. Performance parameters were determined by AUROC under multiple training conditions.
NKX2-5 GWAS Scores	scoring of the GWAS catalog with MinSeqChipS and LS_GKM_SVM for differential NKX2-5 bidning
GATA4 GWAS Scores	scoring of the GWAS catalog with MinSeqChipS and LS_GKM_SVM for differential GATA4 bidning
TBX5 GWAS Scores	scoring of the GWAS catalog with MinSeqChipS and LS_GKM_SVM for differential TBX5 bidning
NKX2-5 GWAS Traits	GWAS catalog trait-associated variants predicted to alter NKX2-5 binding
GATA4 GWAS Traits	GWAS catalog trait-associated variants predicted to alter GATA4 binding
TBX5 GWAS Traits	GWAS catalog trait-associated variants predicted to alter TBX5 binding

## Sheet: Performance_parameters
Negatives generated using LSGKM
Sample	auROC (MinseqChIP) Train: SNPs (Top 300 (+) and lsgkm 300 (-)) Test: SNPs (Top 200 (+) and lsgkm 200 (-))	auROC (LSGKM) (60-40) Train: SNPs (Top 300 (+) and lsgkm 300 (-)) Test: SNPs (Top 200 (+) and lsgkm 200 (-))	auROC (MEME) (60-40) Train: SNPs (Top 300 (+) and lsgkm 300 (-)) Test: SNPs (Top 200 (+) and lsgkm 200 (-))	auROC (MinseqChIP) Train: ChIP-seq (Top 1000) Test: SNPs (Top 500 controls excluded)	auROC (LSGKM) Train: ChIP-seq (Top 1000) Test: SNPs (Top 500 controls excluded)	auROC (MEME) Train:ChIP-seq (Top 1000) Test: SNPs (Top 500)	auROC (MinseqChIP) Train: SNPs (Top 500 controls excluded) Test: ChIP-seq (Top 1000)	auROC (LSGKM) Train: SNPs (Top 500 controls excluded) Test: ChIP-seq (Top 1000)	auROC (MEME) Train: SNPs (Top 500) Test: ChIP-seq Scored (Top 1000)
NKX2-5	0.836888	0.72495	0.709725	0.62095	0.637796	0.521272	0.615363	0.739223	0.638009
GATA4	0.808409	0.729722	0.577449	0.726958	0.667325	0.646484	0.890804	0.808639	0.690967
TBX5	0.865838	0.79055	0.623613	0.608002	0.55542	0.53586	0.555502	0.601838	0.607485
Genomic Negatives (6000 away)
Sample	auROC (MinseqChIP) Train: SNPs (Top 300 (+) and genomic 300 (-)) Test: SNPs (Top 200 (+) and genomic 200 (-))	auROC (LSGKM) (60-40) Train: SNPs (Top 300 (+) and genomic 300 (-)) Test: SNPs (Top 200 (+) and genomic 200 (-))	auROC (MEME) (60-40) Train: SNPs (Top 300 (+) and genomic 300 (-)) Test: SNPs (Top 200 (+) and genomic 200 (-))	auROC (MinseqChIP) Train: ChIP-seq (Top 1000) Test: SNPs (Top 500 controls excluded)	auROC (LSGKM) Train: ChIP-seq (Top 1000) Test: SNPs (Top 500 controls excluded)	auROC (MEME) Train:ChIP-seq (Top 1000) Test: SNPs (Top 500)	auROC (MinseqChIP) Train: SNPs (Top 500 controls excluded) Test: ChIP-seq (Top 1000)	auROC (LSGKM) Train: SNPs (Top 500 controls excluded) Test: ChIP-seq (Top 1000)	auROC (MEME) Train: SNPs (Top 500) Test: ChIP-seq Scored (Top 1000)
NKX2-5	0.824925	0.792025	0.6993	0.609336	0.61524	0.513726	0.60183	0.661415	0.633322
GATA4	0.833187	0.75465	0.59655	0.736852	0.61864	0.678204	0.877155	0.655302	0.690978
TBX5	0.905625	0.84925	0.662288	0.703768	0.63108	0.563352	0.59456	0.733688	0.615741

## Sheet: NKX2-5 GWAS Scores
coordinate	gkm_ref_score_ref	minseq_ref_score_ref	gkm_alt_score_alt	minseq_alt_score_alt	delta_gkm	delta_minseq
chr18:3066627-3066668	-0.0991376	0.19425	-0.112886	0.069989	-0.0137484	-0.124261
chr8:11213528-11213569	-0.0995307	0.084496	-0.0861673	0.099993	0.0133634	0.015497
chr19:44908664-44908705	-0.188122	0.053343	-0.146631	0.07716	0.041491	0.023817
chr19:44908664-44908705	-0.188122	0.053343	-0.158869	0.07716	0.029253	0.023817
chr1:150598653-150598694	-0.813749	0.10431	-0.565916	0.071979	0.247833	-0.032331
chr12:95634077-95634118	-0.307255	0.08091	-0.478267	0.056171	-0.171012	-0.024739
chr16:86575676-86575717	0.207493	0.089587	0.217022	0.1174	0.009529	0.027813
chr1:88820970-88821011	-0.0068409	0.073792	-0.0067492	0.080149	9.17e-05	0.006357
chr17:19313928-19313969	-0.211936	0.057373	-0.192393	0.057981	0.019543	0.000608
chr10:122473645-122473686	-0.364916	0.10831	-0.203375	0.12214	0.161541	0.01383
chr1:234496603-234496644	-0.958839	0.10392	-0.798103	0.10603	0.160736	0.00211
chr6:31511189-31511230	-0.167027	0.091042	-0.167027	0.053407	0	-0.037635
chr6:31511189-31511230	-0.167027	0.091042	-0.17615	0.060086	-0.009123	-0.030956
chr1:155908295-155908336	-0.761106	0.059714	-0.53925	0.073126	0.221856	0.013412
chr17:70298830-70298871	-0.375084	0.09104	-0.304399	0.059259	0.070685	-0.031781
chr6:85002638-85002679	-0.0808239	0.053579	0.0606574	0.047672	0.141481	-0.005907
chr3:21790428-21790469	-0.364912	0.12528	-0.364912	0.10094	0	-0.02434
chr10:125990643-125990684	-0.080433	0.039577	-0.080433	0.059259	0	0.019682
chr22:45419676-45419717	-0.24584	0.067336	-0.285955	0.10094	-0.040115	0.033604
chr2:55646230-55646271	0.0552731	0.23981	0.0116599	0.081338	-0.0436132	-0.158472
chr9:111295175-111295216	0.0248142	0.12488	0.0248142	0.068359	0	-0.056521
chr10:18423301-18423342	0.0738112	0.11555	0.149215	0.21058	0.0754038	0.09503
chr6:27771581-27771622	-0.342961	0.10419	-0.224615	0.11456	0.118346	0.01037
chr9:111022257-111022298	0.0392221	0.20602	0.0392221	0.087265	0	-0.118755
chr6:142242085-142242126	-0.577641	0.10991	-0.511579	0.073126	0.066062	-0.036784
chr18:52693130-52693171	-0.129093	0.085921	-0.0272073	0.07355	0.101886	-0.012371
chr12:109799946-109799987	-0.396368	0.045812	-0.155081	0.065631	0.241287	0.019819
chr3:171878799-171878840	0.338729	0.28135	0.338729	0.045829	0	-0.235521
chr18:44857329-44857370	-0.0325733	0.13147	-0.0949576	0.066198	-0.0623843	-0.065272
chr5:72981877-72981918	0.0186068	0.099217	-0.0118105	0.079012	-0.0304173	-0.020205
chr6:1366600-1366641	-0.286039	0.068737	-0.269806	0.061249	0.016233	-0.007488
chr10:11762433-11762474	-0.0922321	0.15029	-0.0392744	0.066283	0.0529577	-0.084007
chr2:187163570-187163611	-0.0297074	0.11267	0.0969654	0.071007	0.126673	-0.041663
chr2:187163570-187163611	-0.0297074	0.11267	0.0973615	0.071007	0.127069	-0.041663
chr17:45066830-45066871	-0.161657	0.094435	-0.14981	0.058016	0.011847	-0.036419
chr2:55900936-55900977	0.113748	0.11438	0.084311	0.1094	-0.029437	-0.00498
chr2:55900936-55900977	0.113748	0.11438	0.0677172	0.1094	-0.0460308	-0.00498
chr2:42905064-42905105	-0.0728447	0.11082	-0.16512	0.066283	-0.0922753	-0.044537
chr16:87193771-87193812	0.0866772	0.084233	0.0866772	0.071979	0	-0.012254
chr16:87193771-87193812	0.0866772	0.084233	-0.00840965	0.071979	-0.0950869	-0.012254
chr16:51408748-51408789	-0.160943	0.078366	-0.141599	0.071979	0.019344	-0.006387
chr16:51408748-51408789	-0.160943	0.078366	-0.160943	0.058618	0	-0.019748
chr14:91418291-91418332	-0.169089	0.04876	-0.131017	0.073126	0.038072	0.024366
chr14:91418291-91418332	-0.169089	0.04876	-0.169089	0.073126	0	0.024366
chr5:61387276-61387317	-0.047527	0.11186	-0.0581825	0.066469	-0.0106555	-0.045391
chr17:75894262-75894303	-0.132265	0.058278	-0.210845	0.057981	-0.07858	-0.000297
chr17:75894262-75894303	-0.132265	0.058278	-0.200683	0.057981	-0.068418	-0.000297
chr2:55907944-55907985	-0.146571	0.11438	-0.0153989	0.070779	0.131172	-0.043601
chr2:55907944-55907985	-0.146571	0.11438	-0.13633	0.070779	0.010241	-0.043601
chr17:45058915-45058956	-0.0207093	0.11267	-0.0234029	0.081338	-0.0026936	-0.031332
chr16:87199559-87199600	-0.106585	0.10642	-0.106585	0.073126	0	-0.033294
chr6:150697753-150697794	-0.388155	0.04489	-0.388155	0.078123	0	0.033233
chr3:183645455-183645496	-0.0822126	0.091332	-0.0822126	0.074132	0	-0.0172
chr10:103699338-103699379	-0.133193	0.043169	-0.133193	0.1062	0	0.063031
chr10:103699338-103699379	-0.133193	0.043169	-0.120287	0.1062	0.012906	0.063031
chr2:42893589-42893630	0.0858462	0.0756	-0.051357	0.044167	-0.137203	-0.031433
chr2:203144314-203144355	0.0800817	0.19638	0.0800817	0.053014	0	-0.143366
chr10:103850548-103850589	-0.343467	0.20081	-0.351085	0.04349	-0.007618	-0.15732
chr5:83563226-83563267	0.0310736	0.085921	0.0664568	0.08447	0.0353832	-0.001451
chr5:122182663-122182704	0.00754258	0.071257	-0.146055	0.10335	-0.153598	0.032093
chr2:187300419-187300460	-0.0263262	0.11186	0.00104493	0.064081	0.0273711	-0.047779
chr2:187300419-187300460	-0.0263262	0.11186	-0.0374224	0.053922	-0.0110962	-0.057938
chr14:91415023-91415064	-0.211008	0.11365	-0.211008	0.057981	0	-0.055669
chr14:91415023-91415064	-0.211008	0.11365	-0.180685	0.057981	0.030323	-0.055669
chr8:8322103-8322144	0.236511	0.34259	0.260528	0.047696	0.024017	-0.294894
chr13:110390942-110390983	-0.174384	0.055177	-0.189414	0.12432	-0.01503	0.069143
chr13:110390942-110390983	-0.174384	0.055177	-0.244565	0.12432	-0.070181	0.069143
chr14:100159545-100159586	0.0311658	0.10843	0.0147385	0.061761	-0.0164273	-0.046669
chr1:214963859-214963900	0.0681785	0.084233	-0.037738	0.068773	-0.105916	-0.01546
chr17:64990423-64990464	-1.0344	0.045812	-1.07102	0.047573	-0.03662	0.001761
chr6:125622070-125622111	-0.0744816	0.074153	-0.312126	0.067801	-0.237644	-0.006352
chr1:214968207-214968248	-0.166608	0.274	-0.104419	0.12214	0.062189	-0.15186
chr22:24206488-24206529	-0.705991	0.063235	-0.580216	0.066283	0.125775	0.003048
chr12:95106839-95106880	-0.246079	0.19425	-0.0267813	0.10335	0.219298	-0.0909
chr5:56799739-56799780	-0.0783172	0.091042	-0.0783172	0.053218	0	-0.037824
chr5:76665123-76665164	0.0160434	0.11365	0.137686	0.091992	0.121643	-0.021658
chr5:76668662-76668703	-0.352223	0.086005	-0.325408	0.051406	0.026815	-0.034599
chr5:76668662-76668703	-0.352223	0.086005	-0.383838	0.038356	-0.031615	-0.047649
chr5:76701064-76701105	-0.153894	0.060129	-0.205234	0.085835	-0.05134	0.025706
chr5:76701064-76701105	-0.153894	0.060129	-0.186584	0.085835	-0.03269	0.025706
chr5:77662999-77663040	-0.427224	0.08091	-0.462989	0.069989	-0.035765	-0.010921
chr5:77763156-77763197	0.0758384	0.10843	0.101733	0.087806	0.0258946	-0.020624
chr5:77795083-77795124	-0.18733	0.060168	-0.224816	0.073126	-0.037486	0.012958
chr5:88884359-88884400	-0.10786	0.075046	-0.0593092	0.078606	0.0485508	0.00356
chr5:88884359-88884400	-0.10786	0.075046	-0.10786	0.078606	0	0.00356
chr5:89456127-89456168	-0.016577	0.13147	-0.0855693	0.10603	-0.0689923	-0.02544
chr5:111726130-111726171	-0.261007	0.069324	-0.195899	0.054941	0.065108	-0.014383
chr5:111726130-111726171	-0.261007	0.069324	-0.393442	0.054941	-0.132435	-0.014383
chr5:122865319-122865360	-0.290843	0.068236	-0.290843	0.072668	0	0.004432
chr5:132371717-132371758	-0.0516656	0.099217	-0.0516656	0.10603	0	0.006813
chr5:134159370-134159411	-0.0310762	0.076881	-0.123942	0.059259	-0.0928658	-0.017622
chr5:134501310-134501351	-0.0514856	0.11267	0.035491	0.059259	0.0869766	-0.053411
chr5:134501310-134501351	-0.0514856	0.11267	-0.0514856	0.059259	0	-0.053411
chr5:135356534-135356575	-0.237715	0.060509	-0.237715	0.046557	0	-0.013952
chr5:136148235-136148276	-0.152645	0.083955	-0.299134	0.081794	-0.146489	-0.002161
chr5:141322473-141322514	-0.274759	0.054448	-0.274759	0.18127	0	0.126822
chr5:141500094-141500135	-0.334096	0.073074	-0.431817	0.11998	-0.097721	0.046906
chr5:141500094-141500135	-0.334096	0.073074	-0.242513	0.11998	0.091583	0.046906
chr5:141554495-141554536	-0.220188	0.044405	-0.220188	0.08447	0	0.040065
chr5:142012872-142012913	-0.18044	0.089146	-0.209946	0.073126	-0.029506	-0.01602
chr5:158819622-158819663	-0.0287411	0.13147	-0.0287411	0.10603	0	-0.02544
chr5:159208074-159208115	-0.143145	0.06729	-0.143145	0.065653	0	-0.001637
chr5:159208074-159208115	-0.143145	0.06729	-0.117126	0.065653	0.026019	-0.001637
chr5:160168867-160168908	0.104085	0.19425	0.142211	0.10335	0.038126	-0.0909
chr5:160206654-160206695	-0.303034	0.11092	-0.303034	0.07716	0	-0.03376
chr5:178179398-178179439	0.142739	0.082931	0.113603	0.23167	-0.029136	0.148739
chr5:178179398-178179439	0.142739	0.082931	0.0674967	0.23167	-0.0752423	0.148739
chr6:3280951-3280992	-0.0725452	0.15029	0.0278036	0.081008	0.100349	-0.069282
chr6:3442734-3442775	-0.288659	0.091042	-0.340751	0.094481	-0.052092	0.003439
chr6:3446009-3446050	-0.242767	0.05794	-0.242767	0.08447	0	0.02653
chr6:11543089-11543130	-0.148713	0.075046	-0.20875	0.072668	-0.060037	-0.002378
chr6:11543089-11543130	-0.148713	0.075046	-0.209939	0.072668	-0.061226	-0.002378
chr6:22904788-22904829	-0.484955	0.10831	-0.341836	0.07716	0.143119	-0.03115
chr6:25296358-25296399	-0.284738	0.06516	-0.12945	0.050846	0.155288	-0.014314
chr6:25521673-25521714	-0.0775066	0.074204	-0.120927	0.071979	-0.0434204	-0.002225
chr6:25548802-25548843	0.0263282	0.13147	-0.0371777	0.1094	-0.0635059	-0.02207
chr6:29929332-29929373	0.129528	0.22363	0.13815	0.12214	0.008622	-0.10149
chr6:30137357-30137398	0.0342042	0.19425	-0.0786634	0.073126	-0.112868	-0.121124
chr6:30756245-30756286	-0.0914125	0.074204	-0.0964201	0.054941	-0.0050076	-0.019263
chr6:31251187-31251228	-0.193437	0.097792	-0.187253	0.085835	0.006184	-0.011957
chr6:31271721-31271762	-0.118492	0.035934	-0.118492	0.073126	0	0.037192
chr6:31432495-31432536	-0.0497226	0.099217	-0.0497226	0.049968	0	-0.049249
chr6:31423604-31423645	-0.128146	0.12586	-0.0127193	0.066283	0.115427	-0.059577
chr6:31423604-31423645	-0.128146	0.12586	0.00604749	0.066283	0.134193	-0.059577
chr6:31452441-31452482	-0.424294	0.19425	-0.179326	0.10094	0.244968	-0.09331
chr6:31615515-31615556	-0.133267	0.099217	-0.0698293	0.037404	0.0634377	-0.061813
chr6:31724589-31724630	-0.0712523	0.11303	-0.042964	0.078823	0.0282883	-0.034207
chr6:33584405-33584446	-0.270157	0.069324	-0.295413	0.071979	-0.025256	0.002655
chr6:34938371-34938412	-0.184407	0.041498	-0.184407	0.067202	0	0.025704
chr6:34938371-34938412	-0.184407	0.041498	-0.14597	0.067202	0.038437	0.025704
chr6:36458293-36458334	-0.239144	1.2797	-0.130547	0.081258	0.108597	-1.19844
chr6:36526288-36526329	-0.450538	0.092504	-0.242716	0.06339	0.207822	-0.029114
chr6:36556797-36556838	-0.935498	0.084136	-0.935498	0.054941	0	-0.029195
chr6:36556797-36556838	-0.935498	0.084136	-0.905526	0.079059	0.029972	-0.005077
chr6:36755138-36755179	-0.15033	0.098048	-0.0735266	0.050002	0.0768034	-0.048046
chr7:5489434-5489475	-0.944302	0.056985	-0.944302	0.073126	0	0.016141
chr7:6462716-6462757	-0.375246	0.072751	-0.185573	0.10157	0.189673	0.028819
chr7:6462716-6462757	-0.375246	0.072751	-0.177902	0.10157	0.197344	0.028819
chr7:16658622-16658663	0.404804	0.19638	0.399165	0.073126	-0.005639	-0.123254
chr7:16658622-16658663	0.404804	0.19638	0.404804	0.073126	0	-0.123254
chr7:17972614-17972655	-0.305014	0.08465	-0.205827	0.07716	0.099187	-0.00749
chr7:37396096-37396137	-0.133137	0.088545	-0.133137	0.18127	0	0.092725
chr7:37417736-37417777	0.426908	0.96574	0.426908	0.062602	0	-0.903138
chr7:37417736-37417777	0.426908	0.96574	0.306001	0.062602	-0.120907	-0.903138
chr7:44857803-44857844	0.162128	0.097792	0.165299	0.094481	0.003171	-0.003311
chr7:50304461-50304502	-0.12517	0.079343	-0.1553	0.074034	-0.03013	-0.005309
chr7:73626464-73626505	-0.982281	0.099217	-0.982281	0.10119	0	0.001973
chr7:73626464-73626505	-0.982281	0.099217	-0.884284	0.10119	0.097997	0.001973
chr7:73734952-73734993	-0.150952	0.089587	-0.16588	0.057981	-0.014928	-0.031606
chr7:73734952-73734993	-0.150952	0.089587	-0.107438	0.057981	0.043514	-0.031606
chr7:76140652-76140693	-0.133103	0.067407	-0.133103	0.21058	0	0.143173
chr7:80586869-80586910	-0.010632	0.086381	-0.030795	0.065986	-0.020163	-0.020395
chr7:80586869-80586910	-0.010632	0.086381	-0.126488	0.065986	-0.115856	-0.020395
chr7:100664274-100664315	-0.302393	0.060115	-0.302393	0.1094	0	0.049285
chr7:101856630-101856671	-0.00644173	0.16164	-0.00644173	0.049968	0	-0.111672
chr7:101856630-101856671	-0.00644173	0.16164	-0.032866	0.049968	-0.0264243	-0.111672
chr7:106731753-106731794	0.270186	0.10101	0.108047	0.054028	-0.162139	-0.046982
chr7:106731753-106731794	0.270186	0.10101	0.121959	0.04349	-0.148227	-0.05752
chr7:116884438-116884479	-0.178932	0.08921	-0.178932	0.093489	0	0.004279
chr7:123765987-123766028	-0.268913	0.082974	-0.176978	0.17	0.091935	0.087026
chr7:123799008-123799049	0.157326	0.10165	0.149971	0.082035	-0.007355	-0.019615
chr7:129571628-129571669	-0.984189	0.10991	-0.865959	0.081939	0.11823	-0.027971
chr7:129571628-129571669	-0.984189	0.10991	-0.89517	0.081939	0.089019	-0.027971
chr7:130016016-130016057	-0.205292	0.06778	-0.165451	0.050002	0.039841	-0.017778
chr7:134315973-134316014	-0.612433	0.091567	-0.801635	0.10335	-0.189202	0.011783
chr7:135661494-135661535	-0.216539	0.072917	-0.224505	0.24459	-0.007966	0.171673
chr7:135661494-135661535	-0.216539	0.072917	-0.160244	0.24459	0.056295	0.171673
chr7:135972186-135972227	-0.0312698	0.091332	-0.0312698	0.15747	0	0.066138
chr7:68130501-68130542	-0.0898356	0.087078	-0.195703	0.11838	-0.105867	0.031302
chr3:184509775-184509816	-0.107932	0.055177	-0.0402691	0.10391	0.0676629	0.048733
chr7:64752120-64752161	-0.067591	0.09104	-0.0616183	0.11625	0.0059727	0.02521
chr12:62466997-62467038	-0.189261	0.073588	-0.192629	0.094209	-0.003368	0.020621
chr14:73423228-73423269	0.30759	0.19638	0.540598	0.078123	0.233008	-0.118257
chr4:69591283-69591324	-0.302949	0.086381	-0.318561	0.07355	-0.015612	-0.012831
chr5:35045620-35045661	-0.226559	0.08009	-0.226559	0.053407	0	-0.026683
chr5:35045620-35045661	-0.226559	0.08009	-0.169917	0.053407	0.056642	-0.026683
chr12:242281-242322	-0.148643	0.067312	-0.213039	0.079685	-0.064396	0.012373
chr12:242281-242322	-0.148643	0.067312	-0.156063	0.24888	-0.00742	0.181568
chr5:151314325-151314366	-0.125543	0.11092	-0.121639	0.073126	0.003904	-0.037794
chr19:32865965-32866006	0.0158286	0.081256	0.0121662	0.038335	-0.0036624	-0.042921
chr19:32865965-32866006	0.0158286	0.081256	0.0158286	0.038335	0	-0.042921
chr2:73641181-73641222	-0.33633	0.082388	-0.178799	0.10119	0.157531	0.018802
chr2:73641181-73641222	-0.33633	0.082388	-0.33633	0.10119	0	0.018802
chr9:133269995-133270036	-0.770588	0.067988	-0.770588	0.049632	0	-0.018356
chr9:133269995-133270036	-0.770588	0.067988	-0.423216	0.049632	0.347372	-0.018356
chr11:81225187-81225228	-0.0145246	0.10457	0.107814	0.081939	0.122339	-0.022631
chr10:98388399-98388440	0.0357934	0.13147	0.0210708	0.06445	-0.0147226	-0.06702
chr10:98388399-98388440	0.0357934	0.13147	-0.0207952	0.060305	-0.0565886	-0.071165
chr22:43928827-43928868	-0.123751	0.11082	-0.00699877	0.19691	0.116752	0.08609
chr22:43928827-43928868	-0.123751	0.11082	-0.0799036	0.19691	0.0438474	0.08609
chr21:34977904-34977945	-0.825036	0.083025	-0.830553	0.059259	-0.005517	-0.023766
chr21:37451249-37451290	-0.17796	0.091567	-0.195439	0.079012	-0.017479	-0.012555
chr21:38466092-38466133	-0.0947773	0.09264	-0.0200019	0.07716	0.0747754	-0.01548
chr21:43559770-43559811	-0.865938	0.041124	-0.865938	0.079685	0	0.038561
chr21:44849591-44849632	-0.0438362	0.086515	-0.144519	0.066283	-0.100683	-0.020232
chr21:46484652-46484693	0.128751	0.10392	0.128751	0.10094	0	-0.00298
chr22:24375967-24376008	-0.577919	0.049071	-0.169577	0.057938	0.408342	0.008867
chr22:27614955-27614996	-0.00125377	0.043068	-0.0565934	0.11456	-0.0553396	0.071492
chr22:27785391-27785432	-0.05758	0.11092	-0.0997086	0.1094	-0.0421286	-0.00152
chr22:27785391-27785432	-0.05758	0.11092	-0.05758	0.1094	0	-0.00152
chr22:28707209-28707250	0.0236852	0.19058	0.113181	0.048466	0.0894958	-0.142114
chr22:30042438-30042479	-0.132301	0.083339	-0.116027	0.087265	0.016274	0.003926
chr22:30673473-30673514	-0.0294272	0.13246	-0.0294312	0.057969	-4e-06	-0.074491
chr22:30687244-30687285	-0.0703498	0.098917	-0.0936009	0.079012	-0.0232511	-0.019905
chr22:32475220-32475261	-0.128973	0.13734	-0.0367359	0.073126	0.0922371	-0.064214
chr22:32503038-32503079	-0.204766	0.044937	-0.193165	0.15747	0.011601	0.112533
chr22:36281848-36281889	0.0703267	0.10419	-0.001995	0.1062	-0.0723217	0.00201
chr22:36362482-36362523	-0.0398662	0.10991	0.0320839	0.080149	0.0719501	-0.029761
chr22:36362482-36362523	-0.0398662	0.10991	-0.0255494	0.080149	0.0143168	-0.029761
chr22:38728887-38728928	0.125904	0.20602	0.0792767	0.078606	-0.0466273	-0.127414
chr22:41403743-41403784	-0.193858	0.057373	-0.163572	0.071979	0.030286	0.014606
chr22:50511362-50511403	-0.0629369	0.11092	-0.0629369	0.062602	0	-0.048318
chr22:50526413-50526454	-0.185808	0.045466	-0.163268	0.073126	0.02254	0.02766
chr22:50532817-50532858	0.175855	0.096495	0.150294	0.24888	-0.025561	0.152385
chr22:50532817-50532858	0.175855	0.096495	0.0859725	0.24888	-0.0898825	0.152385
chr22:50532817-50532858	0.175855	0.096495	0.017622	0.24888	-0.158233	0.152385
chr22:50554776-50554817	-0.678214	0.089214	-0.678214	0.17246	0	0.083246
chrX:1466166-1466207	-0.103753	0.11555	-0.109841	0.10603	-0.006088	-0.00952
chr19:17114298-17114339	-0.190268	0.065684	-0.17774	0.073126	0.012528	0.007442
chr19:17114298-17114339	-0.190268	0.065684	-0.190268	0.073126	0	0.007442
chr19:17141211-17141252	-0.164126	0.08009	-0.140882	0.04949	0.023244	-0.0306
chr19:17142144-17142185	-0.781533	0.048256	-0.640694	0.042135	0.140839	-0.006121
chr19:17999745-17999786	-0.138819	0.080831	-0.145911	0.078123	-0.007092	-0.002708
chr19:18304914-18304955	-0.291033	0.058278	-0.291033	0.11456	0	0.056282
chr19:19367193-19367234	0.094797	0.11303	0.094797	0.05832	0	-0.05471
chr19:19367193-19367234	0.094797	0.11303	0.198249	0.05832	0.103452	-0.05471
chr19:32581159-32581200	-0.154633	0.11303	-0.154633	0.073126	0	-0.039904
chr19:32581159-32581200	-0.154633	0.11303	-0.120809	0.073126	0.033824	-0.039904
chr19:32582505-32582546	-0.00885416	0.19058	0.226448	0.073126	0.235302	-0.117454
chr19:32582505-32582546	-0.00885416	0.19058	0.0156389	0.073126	0.0244931	-0.117454
chr19:33249365-33249406	-0.140791	0.045393	-0.156231	0.050002	-0.01544	0.004609
chr19:33263622-33263663	-0.0882094	0.058278	-0.0823957	0.073126	0.0058137	0.014848
chr19:33263622-33263663	-0.0882094	0.058278	-0.0882094	0.073126	0	0.014848
chr19:33264438-33264479	0.0108861	0.11082	0.0108861	0.073126	0	-0.037694
chr19:33264438-33264479	0.0108861	0.11082	-0.135578	0.073126	-0.146464	-0.037694
chr19:33358195-33358236	-0.283826	0.075844	-0.299948	0.081939	-0.016122	0.006095
chr19:33401483-33401524	-0.186515	0.053568	-0.205375	0.073126	-0.01886	0.019558
chr19:33401483-33401524	-0.186515	0.053568	-0.186515	0.073126	0	0.019558
chr19:35068550-35068591	-0.0244293	0.089587	0.00434886	0.07716	0.0287782	-0.012427
chr19:40344320-40344361	-0.353788	0.050774	-0.319549	0.079956	0.034239	0.029182
chr19:40442141-40442182	-0.13477	0.12422	-0.0292626	0.12214	0.105507	-0.00208
chr19:44908802-44908843	-0.0855058	0.15029	-0.111645	0.06445	-0.0261392	-0.08584
chr19:44908802-44908843	-0.0855058	0.15029	-0.117496	0.061102	-0.0319902	-0.089188
chr19:44908802-44908843	-0.0855058	0.15029	-0.176426	0.061102	-0.0909202	-0.089188
chr19:45239857-45239898	-0.189729	0.085674	-0.129318	0.047696	0.060411	-0.037978
chr19:45678114-45678155	-0.0744134	0.11092	-0.0744134	0.073126	0	-0.037794
chr19:45678114-45678155	-0.0744134	0.11092	-0.0878715	0.071979	-0.0134581	-0.038941
chr19:48629590-48629631	-0.048874	0.060604	-0.0459908	0.073126	0.0028832	0.012522
chr19:52922231-52922272	-0.029161	0.11092	-0.029161	0.078823	0	-0.032097
chr19:55228425-55228466	0.0372223	0.15029	0.0418912	0.075947	0.0046689	-0.074343
chr19:57643437-57643478	-0.110649	0.10101	-0.110649	0.057981	0	-0.043029
chr19:58506030-58506071	0.328346	0.094435	0.328346	0.078123	0	-0.016312
chr20:3767092-3767133	-0.259931	0.039577	-0.110517	0.086519	0.149414	0.046942
chr20:3797375-3797416	0.132683	0.089457	0.127908	0.11456	-0.004775	0.025103
chr20:4176405-4176446	-0.0139791	0.10642	-0.0305925	0.061761	-0.0166134	-0.044659
chr20:4176405-4176446	-0.0139791	0.10642	-0.0215822	0.071979	-0.0076031	-0.034441
chr20:31769189-31769230	-0.295956	0.079577	-0.295956	0.074884	0	-0.004693
chr20:32552343-32552384	0.213068	0.14006	0.262177	0.081338	0.049109	-0.058722
chr20:32652107-32652148	-0.639686	0.045606	-0.670598	0.073126	-0.030912	0.02752
chr20:37047089-37047130	-0.225392	0.14006	-0.276232	0.081939	-0.05084	-0.058121
chr20:37047089-37047130	-0.225392	0.14006	-0.239119	0.081939	-0.013727	-0.058121
chr20:39934583-39934624	-0.418439	0.088545	-0.35576	0.086519	0.062679	-0.002026
chr20:39934583-39934624	-0.418439	0.088545	-0.418439	0.082035	0	-0.00651
chr20:43622782-43622823	-0.133419	0.074556	-0.214415	0.080149	-0.080996	0.005593
chr20:44210801-44210842	-0.097736	0.10991	-0.0669432	0.073126	0.0307928	-0.036784
chr20:45941271-45941312	-0.0783176	0.11303	-0.0364982	0.055899	0.0418194	-0.057131
chr20:45941271-45941312	-0.0783176	0.11303	-0.0640211	0.045829	0.0142965	-0.067201
chr20:48823663-48823704	-0.124211	0.10062	-0.124211	0.055038	0	-0.045582
chr20:50483488-50483529	-0.00504128	0.11092	0.00726342	0.10335	0.0123047	-0.00757
chr20:53570278-53570319	-0.0914893	0.097792	-0.125731	0.066283	-0.0342417	-0.031509
chr20:53605547-53605588	-0.173305	0.11251	-0.173305	0.061761	0	-0.050749
chr20:53605547-53605588	-0.173305	0.11251	-0.217998	0.061761	-0.044693	-0.050749
chr20:53937325-53937366	-0.575399	0.054448	-0.629649	0.17	-0.05425	0.115552
chr20:57413282-57413323	-0.155578	0.089214	-0.0857772	0.10603	0.0698008	0.016816
chr20:57396733-57396774	-0.255265	0.08465	-0.255265	0.068819	0	-0.015831
chr20:57415294-57415335	-0.236662	0.048475	-0.240932	0.071979	-0.00427	0.023504
chr20:57416561-57416602	-0.0640977	0.067783	-0.103054	0.066736	-0.0389563	-0.001047
chr20:57416561-57416602	-0.0640977	0.067783	-0.125007	0.05614	-0.0609093	-0.011643
chr20:62105202-62105243	-0.0913707	0.091161	-0.232789	0.057938	-0.141418	-0.033223
chr20:63563714-63563755	-0.245409	0.039984	-0.193175	0.08447	0.052234	0.044486
chr20:63923440-63923481	-0.408111	0.097792	-0.408111	0.04081	0	-0.056982
chr20:64080086-64080127	-0.118042	0.044937	-0.112783	0.073126	0.005259	0.028189
chr20:64080086-64080127	-0.118042	0.044937	-0.118042	0.073126	0	0.028189
chr21:33753972-33754013	0.119135	0.099967	0.243011	0.069202	0.123876	-0.030765
chr21:33753972-33754013	0.119135	0.099967	0.119135	0.069202	0	-0.030765
chr16:71765836-71765877	-0.220908	0.053568	-0.159208	0.078662	0.0617	0.025094
chr16:73878669-73878710	-0.0796111	0.10101	-0.0282426	0.074034	0.0513685	-0.026976
chr16:73878669-73878710	-0.0796111	0.10101	0.00472923	0.074034	0.0843403	-0.026976
chr16:85688183-85688224	0.11295	0.11555	0.0684895	0.073126	-0.0444605	-0.042424
chr17:7830495-7830536	-0.214369	0.05794	-0.222848	0.11456	-0.008479	0.05662
chr17:7830495-7830536	-0.214369	0.05794	-0.266588	0.11456	-0.052219	0.05662
chr17:31381117-31381158	-0.169132	0.084529	-0.117206	0.11856	0.051926	0.034031
chr17:46086937-46086978	-0.91473	0.08258	-0.91473	0.043055	0	-0.039525
chr17:80554931-80554972	0.587486	0.28135	0.312522	0.073115	-0.274964	-0.208235
chr18:55420733-55420774	-0.125472	0.274	-0.0897705	0.055066	0.0357015	-0.218934
chr18:55420733-55420774	-0.125472	0.274	-0.125472	0.055066	0	-0.218934
chr19:48738699-48738740	-0.144234	0.10457	-0.0939782	0.10094	0.0502558	-0.00363
chr20:18675866-18675907	-0.116038	0.096495	-0.0612142	0.079956	0.0548238	-0.016539
chr21:33060725-33060766	-0.015512	0.11082	-0.015597	0.050002	-8.5e-05	-0.060818
chr21:33060725-33060766	-0.015512	0.11082	-0.00742766	0.073126	0.00808434	-0.037694
chr22:41420628-41420669	-0.556148	0.069902	-0.636836	0.071436	-0.080688	0.001534
chr22:41420628-41420669	-0.556148	0.069902	-0.556148	0.071436	0	0.001534
chr22:46085723-46085764	-0.177721	0.089146	-0.11207	0.078123	0.065651	-0.011023
chr1:65954202-65954243	0.0102833	0.30629	-0.245434	0.21058	-0.255717	-0.09571
chr1:73382907-73382948	0.164949	0.25202	0.203497	0.24673	0.038548	-0.00529
chr2:27508053-27508094	-0.0497072	0.097792	-0.0645471	0.073126	-0.0148399	-0.024666
chr2:27508053-27508094	-0.0497072	0.097792	-0.0497072	0.073126	0	-0.024666
chr2:27508053-27508094	-0.0497072	0.097792	-0.0948082	0.073126	-0.045101	-0.024666
chr2:27508053-27508094	-0.0497072	0.097792	-0.0413838	0.081338	0.0083234	-0.016454
chr2:44914021-44914062	-0.0249109	0.11082	-0.0249109	0.048014	0	-0.062806
chr2:57815086-57815127	-0.113512	0.08258	-0.113512	0.08447	0	0.00189
chr2:57815086-57815127	-0.113512	0.08258	-0.106893	0.059259	0.006619	-0.023321
chr2:103517954-103517995	-0.104	0.10843	-0.133436	0.068819	-0.029436	-0.039611
chr2:137506641-137506682	-0.0396894	0.092504	0.225677	0.079685	0.265366	-0.012819
chr2:226299917-226299958	0.101518	0.091161	0.169858	0.048384	0.06834	-0.042777
chr3:85464623-85464664	-0.23509	0.064035	-0.255973	0.12432	-0.020883	0.060285
chr4:39403232-39403273	0.328389	0.19638	0.239081	0.081939	-0.089308	-0.114441
chr4:98792179-98792220	-0.321665	0.09104	-0.293235	0.04168	0.02843	-0.04936
chr4:98792179-98792220	-0.321665	0.09104	-0.202767	0.04168	0.118898	-0.04936
chr4:99107974-99108015	-0.0770531	0.076881	-0.0770531	0.088537	0	0.011656
chr11:8646515-8646556	0.0176917	0.23189	-0.0702147	0.069989	-0.0879064	-0.161901
chr11:27626804-27626845	-0.0168331	0.11993	-0.00250087	0.071436	0.0143322	-0.048494
chr11:27626804-27626845	-0.0168331	0.11993	0.0373668	0.071436	0.0541999	-0.048494
chr11:33182593-33182634	-0.257375	0.11186	-0.257375	0.1094	0	-0.00246
chr11:46321372-46321413	-0.93813	0.076881	-0.89521	0.070779	0.04292	-0.006102
chr11:47407674-47407715	-0.218502	0.086515	-0.218502	0.074784	0	-0.011731
chr11:113493949-113493990	-0.310218	0.086643	-0.310218	0.1909	0	0.104257
chr11:113493949-113493990	-0.310218	0.086643	-0.431598	0.1909	-0.12138	0.104257
chr11:113767435-113767476	-0.0956576	0.11092	-0.039478	0.067801	0.0561796	-0.043119
chr11:116220115-116220156	-0.111212	0.099967	-0.140982	0.074784	-0.02977	-0.025183
chr11:121672195-121672236	0.265248	0.22363	0.316896	0.078505	0.051648	-0.145125
chr11:121672195-121672236	0.265248	0.22363	0.326814	0.074784	0.061566	-0.148846
chr12:49869345-49869386	0.395712	0.20081	0.455188	0.048466	0.059476	-0.152344
chr12:49869345-49869386	0.395712	0.20081	0.395579	0.073126	-0.000133	-0.127684
chr12:51485027-51485068	-0.0671774	0.091332	-0.0647865	0.048384	0.0023909	-0.042948
chr12:81214259-81214300	0.119908	0.13734	0.0950723	0.061102	-0.0248357	-0.076238
chr12:87393684-87393725	0.383737	0.11092	0.382515	0.062602	-0.001222	-0.048318
chr12:91679761-91679802	-0.050999	0.15754	0.0392532	0.11019	0.0902522	-0.04735
chr13:67514893-67514934	0.278647	0.10165	0.185935	0.11856	-0.092712	0.01691
chr14:56817230-56817271	-0.163275	0.09104	-0.158123	0.063879	0.005152	-0.027161
chr14:56817230-56817271	-0.163275	0.09104	-0.170329	0.063879	-0.007054	-0.027161
chr14:58277014-58277055	-0.768486	0.10991	-0.58258	0.081939	0.185906	-0.027971
chr14:58277014-58277055	-0.768486	0.10991	-0.659643	0.11456	0.108843	0.00465
chr14:94378590-94378631	-0.0665181	0.092504	-0.0665181	0.061761	0	-0.030743
chr14:94378590-94378631	-0.0665181	0.092504	-0.048514	0.071979	0.0180041	-0.020525
chr15:47392842-47392883	-0.205035	0.079343	-0.209317	0.072152	-0.004282	-0.007191
chr15:74735519-74735560	0.00690539	0.078577	0.0738899	0.071436	0.0669845	-0.007141
chr15:74735519-74735560	0.00690539	0.078577	-0.0287364	0.081939	-0.0356418	0.003362
chr15:86310500-86310541	-0.193996	0.091925	-0.229383	0.065348	-0.035387	-0.026577
chr16:24681707-24681748	0.0685176	0.11251	0.0906598	0.081338	0.0221422	-0.031172
chr16:24681707-24681748	0.0685176	0.11251	0.0685176	0.081338	0	-0.031172
chr16:28483482-28483523	-0.578983	0.13734	-0.519693	0.081939	0.05929	-0.055401
chr16:30080707-30080748	-0.449107	0.089214	-0.313219	0.1174	0.135888	0.028186
chr16:53769642-53769683	-0.212771	0.073275	-0.3156	0.079012	-0.102829	0.005737
chr16:53769642-53769683	-0.212771	0.073275	-0.205812	0.079012	0.006959	0.005737
chr4:99318142-99318183	-0.230866	0.065684	-0.306514	0.1174	-0.075648	0.051716
chr4:99318142-99318183	-0.230866	0.065684	-0.372828	0.1174	-0.141962	0.051716
chr4:99318142-99318183	-0.230866	0.065684	-0.230866	0.1174	0	0.051716
chr4:99318142-99318183	-0.230866	0.065684	-0.244732	0.1174	-0.013866	0.051716
chr4:99489045-99489086	-0.0191351	0.10457	-0.0191351	0.07716	0	-0.02741
chr4:99963943-99963984	-0.039089	0.08911	-0.0759737	0.060086	-0.0368847	-0.029024
chr4:100577873-100577914	0.0986306	0.076881	0.0397399	0.073126	-0.0588907	-0.003755
chr4:102276905-102276946	0.25928	0.078323	0.25928	0.078662	0	0.000339
chr4:102276905-102276946	0.25928	0.078323	0.156871	0.12479	-0.102409	0.046467
chr7:153791969-153792010	0.0257909	0.11251	-0.00182269	0.046557	-0.0276136	-0.065953
chr8:56512295-56512336	-0.173927	0.067196	-0.264175	0.057981	-0.090248	-0.009215
chr10:71148174-71148215	-0.0654442	0.08704	0.00839835	0.071915	0.0738425	-0.015125
chr10:108778056-108778097	0.752177	0.10642	0.840334	0.071436	0.088157	-0.034984
chr10:109006865-109006906	-0.113895	0.10062	-0.0963058	0.061249	0.0175892	-0.039371
chr11:47402350-47402391	-0.0294298	0.063354	-0.0294298	0.041188	0	-0.022166
chr11:57713131-57713172	-0.0169473	0.089214	0.0358491	0.045237	0.0527964	-0.043977
chr12:51510056-51510097	-0.228393	0.11251	-0.138501	0.073126	0.089892	-0.039384
chr14:58299165-58299206	-0.0946382	0.11092	-0.317178	0.073126	-0.22254	-0.037794
chr14:58299165-58299206	-0.0946382	0.11092	-0.0946382	0.073126	0	-0.037794
chr14:103889526-103889567	-0.457854	0.057373	-0.457854	0.057981	0	0.000608
chr16:53786881-53786922	-0.243366	0.089214	-0.243366	0.071979	0	-0.017235
chr19:48703140-48703181	-0.173667	0.11092	-0.132375	0.085835	0.041292	-0.025085
chr19:48703140-48703181	-0.173667	0.11092	-0.154822	0.085835	0.018845	-0.025085
chr19:48703140-48703181	-0.173667	0.11092	-0.173667	0.085835	0	-0.025085
chr14:102527708-102527749	-0.138954	0.13147	-0.138954	0.073126	0	-0.058344
chr14:102527708-102527749	-0.138954	0.13147	-0.0909821	0.073126	0.0479719	-0.058344
chr14:103384915-103384956	-0.0713542	0.080831	-0.091322	0.10603	-0.0199678	0.025199
chr14:103384915-103384956	-0.0713542	0.080831	-0.0713542	0.071979	0	-0.008852
chr14:105293483-105293524	-0.0378198	0.10642	-0.0507927	0.065348	-0.0129729	-0.041072
chr15:31260774-31260815	0.140961	0.14006	0.170866	0.24673	0.029905	0.10667
chr15:31309864-31309905	0.339987	0.11251	0.336205	0.062602	-0.003782	-0.049908
chr15:36578034-36578075	-0.106734	0.14006	-0.371155	0.081939	-0.264421	-0.058121
chr15:40456499-40456540	-0.0674277	0.067988	-0.0331676	0.066283	0.0342601	-0.001705
chr15:50442079-50442120	-0.176981	0.094435	0.0626915	0.081939	0.239673	-0.012496
chr15:51718787-51718828	-0.258138	0.071627	-0.29732	0.045333	-0.039182	-0.026294
chr15:56253767-56253808	-0.0189447	0.12422	-0.0312894	0.10094	-0.0123447	-0.02328
chr15:56253767-56253808	-0.0189447	0.12422	-0.0189447	0.10094	0	-0.02328
chr15:62561866-62561907	0.0260804	0.092504	-0.0755003	0.086519	-0.101581	-0.005985
chr15:65457322-65457363	-0.797226	0.045812	-0.66884	0.057981	0.128386	0.012169
chr15:69436690-69436731	0.0840081	0.2221	0.208145	0.10094	0.124137	-0.12116
chr15:75098686-75098727	-0.272455	0.059714	-0.272455	0.074784	0	0.01507
chr15:75206383-75206424	-0.187177	0.092504	-0.132868	0.073126	0.054309	-0.019378
chr15:78244877-78244918	-0.000723742	0.11555	0.00647534	0.073126	0.00719908	-0.042424
chr15:85619672-85619713	-0.161215	0.096495	0.0894201	0.072614	0.250635	-0.023881
chr16:120309-120350	-0.0062857	0.11303	0.0636876	0.045829	0.0699733	-0.067201
chr16:120057-120098	-0.087955	0.11438	-0.0881395	0.24888	-0.0001845	0.1345
chr16:120057-120098	-0.087955	0.11438	-0.142009	0.24888	-0.054054	0.1345
chr16:182378-182419	-0.342864	0.09104	-0.342864	0.059259	0	-0.031781
chr16:227380-227421	-0.0672847	0.071005	-0.0672847	0.072668	0	0.001663
chr16:583744-583785	-0.232741	0.080831	-0.217165	0.071173	0.015576	-0.009658
chr16:581732-581773	-0.589557	0.097792	-0.546979	0.071979	0.042578	-0.025813
chr11:95153448-95153489	-0.0361437	0.10419	0.0311262	0.073126	0.0672699	-0.031064
chr11:95153448-95153489	-0.0361437	0.10419	-0.00152232	0.073126	0.0346214	-0.031064
chr11:95578076-95578117	-0.198347	0.078323	-0.198347	0.046614	0	-0.031709
chr11:95578076-95578117	-0.198347	0.078323	-0.210846	0.046614	-0.012499	-0.031709
chr11:100623244-100623285	0.0454547	0.084569	0.0751705	0.075947	0.0297158	-0.008622
chr11:108475356-108475397	0.00484724	0.10457	0.0110158	0.066283	0.00616856	-0.038287
chr11:108475356-108475397	0.00484724	0.10457	-0.00489515	0.066283	-0.00974239	-0.038287
chr11:108272709-108272750	0.072579	0.091042	0.166158	0.071979	0.093579	-0.019063
chr11:111774080-111774121	-0.582635	0.039927	-0.582635	0.071979	0	0.032052
chr11:114110499-114110540	0.132491	0.070078	0.132491	0.087265	0	0.017187
chr11:114110499-114110540	0.132491	0.070078	0.134985	0.087265	0.002494	0.017187
chr11:116778181-116778222	-0.163676	0.10392	-0.0917698	0.071979	0.0719062	-0.031941
chr11:116778181-116778222	-0.163676	0.10392	-0.0869541	0.062119	0.0767219	-0.041801
chr11:116778181-116778222	-0.163676	0.10392	-0.0816784	0.069989	0.0819976	-0.033931
chr11:116778181-116778222	-0.163676	0.10392	-0.163676	0.11456	0	0.01064
chr11:116779559-116779600	0.101373	0.30629	0.101373	0.10619	0	-0.2001
chr11:116779559-116779600	0.101373	0.30629	-0.100304	0.10619	-0.201677	-0.2001
chr11:117148028-117148069	-1.06184	0.054448	-1.20772	0.1498	-0.14588	0.095352
chr11:119097028-119097069	-0.247829	0.078047	-0.280853	0.073115	-0.033024	-0.004932
chr11:119173806-119173847	-0.130438	0.0763	-0.130438	0.06445	0	-0.01185
chr11:128067851-128067892	-0.158813	0.086381	-0.230207	0.21058	-0.071394	0.124199
chr12:3962052-3962093	-0.150776	0.11092	0.00855769	0.10335	0.159334	-0.00757
chr12:4221322-4221363	-0.177834	0.071257	-0.205136	0.08817	-0.027302	0.016913
chr12:6616351-6616392	-0.0633863	0.05946	-0.0633863	0.10157	0	0.04211
chr12:7023690-7023731	-0.0604158	0.074112	-0.0730797	0.061761	-0.0126639	-0.012351
chr12:8037590-8037631	0.210614	0.21991	0.210614	0.067801	0	-0.152109
chr12:10444101-10444142	0.0345951	0.089146	0.0345951	0.10094	0	0.011794
chr12:11869542-11869583	-0.130564	0.038337	-0.130564	0.073126	0	0.034789
chr12:12726300-12726341	-0.0486951	0.10101	-0.0486951	0.12214	0	0.02113
chr12:12726300-12726341	-0.0486951	0.10101	-0.234747	0.12214	-0.186052	0.02113
chr12:12969114-12969155	-0.136407	0.060564	-0.138355	0.043324	-0.001948	-0.01724
chr12:14398455-14398496	-0.647242	0.084203	-0.647242	0.061251	0	-0.022952
chr12:21178595-21178636	0.0358686	0.10431	-0.0325854	0.16459	-0.068454	0.06028
chr12:21178595-21178636	0.0358686	0.10431	-0.0595571	0.052535	-0.0954257	-0.051775
chr12:31964247-31964288	0.0688792	0.083955	-0.0685147	0.07355	-0.137394	-0.010405
chr12:47784710-47784751	-0.190803	0.050118	-0.12757	0.073126	0.063233	0.023008
chr12:52915965-52916006	0.0379301	0.20081	0.0379301	0.17246	0	-0.02835
chr12:53364027-53364068	-0.301017	0.073593	-0.368213	0.1094	-0.067196	0.035807
chr12:53364027-53364068	-0.301017	0.073593	-0.301017	0.071173	0	-0.00242
chr12:54292076-54292117	0.00452717	0.10101	0.0436118	0.055145	0.0390846	-0.045865
chr12:54292076-54292117	0.00452717	0.10101	0.0341003	0.055145	0.0295731	-0.045865
chr12:56752265-56752306	-0.0537621	0.089146	-0.0537621	0.07716	0	-0.011986
chr12:56752265-56752306	-0.0537621	0.089146	-0.0337119	0.07716	0.0200502	-0.011986
chr12:68786129-68786170	-0.0232908	0.091042	-0.114274	0.059233	-0.0909832	-0.031809
chr12:88417892-88417933	0.0285213	0.074556	-0.0113886	0.07716	-0.0399099	0.002604
chr12:93413915-93413956	0.109806	0.10392	0.110857	0.10603	0.001051	0.00211
chr12:93413915-93413956	0.109806	0.10392	0.109806	0.10603	0	0.00211
chr12:111467421-111467462	-0.203091	0.067288	-0.239297	0.081939	-0.036206	0.014651
chr12:111654638-111654679	0.0103894	0.19058	-0.00150203	0.081338	-0.0118914	-0.109242
chr12:112541211-112541252	0.236269	0.074556	0.236269	0.071436	0	-0.00312
chr12:120485026-120485067	-0.0390091	0.042456	-0.00614312	0.057981	0.032866	0.015525
chr12:120719712-120719753	-0.142107	0.066247	-0.175613	0.064582	-0.033506	-0.001665
chr12:121739396-121739437	0.158109	0.11251	0.148154	0.07716	-0.009955	-0.03535
chr12:122133422-122133463	-0.163609	0.10431	-0.163609	0.057981	0	-0.046329
chr12:122133422-122133463	-0.163609	0.10431	-0.188155	0.16512	-0.024546	0.06081
chr12:124020877-124020918	-0.217261	0.28809	-0.193702	0.11456	0.023559	-0.17353
chr12:124020877-124020918	-0.217261	0.28809	-0.217261	0.068819	0	-0.219271
chr12:131949826-131949867	-0.094843	0.047929	-0.0921425	0.073126	0.0027005	0.025197
chr12:131949826-131949867	-0.094843	0.047929	-0.0712607	0.073126	0.0235823	0.025197
chr12:132720003-132720044	0.0611097	0.10101	0.0470556	0.074784	-0.0140541	-0.026226
chr13:28039836-28039877	-0.361352	0.10831	-0.195705	0.082035	0.165647	-0.026275
chr13:30497131-30497172	0.0374465	0.14006	0.00705083	0.061824	-0.0303957	-0.078236
chr13:40586422-40586463	0.00470178	0.096495	0.0448925	0.081338	0.0401907	-0.015157
chr13:40586422-40586463	0.00470178	0.096495	0.00470178	0.081338	0	-0.015157
chr13:41005653-41005694	0.0389838	0.08144	0.0389838	0.061251	0	-0.020189
chr13:70662459-70662500	-0.565595	0.067988	-0.565595	0.075272	0	0.007284
chr13:70662459-70662500	-0.565595	0.067988	-0.528462	0.049334	0.037133	-0.018654
chr13:72744981-72745022	-0.0259292	0.050118	0.0644138	0.10603	0.090343	0.055912
chr13:75484997-75485038	-0.64927	0.066173	-0.64927	0.078606	0	0.012433
chr13:78438847-78438888	-0.37172	0.05689	-0.0860682	0.087912	0.285652	0.031022
chr13:108769758-108769799	-0.103328	0.081804	-0.0534595	0.24888	0.0498685	0.167076
chr13:109755448-109755489	-0.0655085	0.081804	-0.0492006	0.10157	0.0163079	0.019766
chr13:113255005-113255046	0.177531	0.12586	0.16105	0.073049	-0.016481	-0.052811
chr13:113543184-113543225	-0.287345	0.11092	-0.287345	0.073126	0	-0.037794
chr13:113843556-113843597	0.0102046	0.12586	0.0579598	0.071979	0.0477552	-0.053881
chr13:113843556-113843597	0.0102046	0.12586	0.0604531	0.071979	0.0502485	-0.053881
chr14:24404967-24405008	0.139312	0.10642	0.139312	0.071979	0	-0.034441
chr14:24404967-24405008	0.139312	0.10642	0.180245	0.071979	0.040933	-0.034441
chr14:37218905-37218946	-0.931194	0.049789	-0.931194	0.051023	0	0.001234
chr14:64784018-64784059	0.14823	0.23981	0.14823	0.087265	0	-0.152545
chr14:64793489-64793530	-0.114472	0.054936	-0.124711	0.073126	-0.010239	0.01819
chr14:64806119-64806160	-0.908761	0.037323	-0.908761	0.10619	0	0.068867
chr14:64816215-64816256	-0.0296615	0.086381	-0.0296615	0.061761	0	-0.02462
chr14:64835240-64835281	-0.556654	0.066247	-0.556654	0.054941	0	-0.011306
chr14:64878932-64878973	-0.0842271	0.09104	-0.0471894	0.073126	0.0370377	-0.017914
chr14:65020956-65020997	0.329885	1.2797	0.329885	0.072614	0	-1.20709
chr14:65020956-65020997	0.329885	1.2797	0.379399	0.072614	0.049514	-1.20709
chr14:67940763-67940804	-0.377596	0.091042	-0.498816	0.10835	-0.12122	0.017308
chr14:69616910-69616951	-0.0529803	0.089587	-0.0805578	0.07716	-0.0275775	-0.012427
chr14:95536841-95536882	0.0918547	0.099967	0.0918547	0.061761	0	-0.038206
chr14:95536841-95536882	0.0918547	0.099967	-0.0510753	0.061761	-0.14293	-0.038206
chr14:100715524-100715565	-0.0532514	0.11092	-0.0515127	0.050002	0.0017387	-0.060918
chr11:98216851-98216892	-0.222477	0.054448	-0.222477	0.14748	0	0.093032
chr3:160011848-160011889	0.218991	0.079343	0.222454	0.082035	0.003463	0.002692
chr3:183662227-183662268	-0.135568	0.084529	-0.137212	0.08447	-0.001644	-5.9e-05
chr3:183662227-183662268	-0.135568	0.084529	0.0228128	0.08447	0.158381	-5.9e-05
chr6:42893988-42894029	-0.277335	0.10831	-0.277335	0.076626	0	-0.031684
chr6:42893988-42894029	-0.277335	0.10831	-0.264774	0.039011	0.012561	-0.069299
chr6:44097305-44097346	-0.0459393	0.13246	-0.0546472	0.054028	-0.0087079	-0.078432
chr6:46925598-46925639	-0.464211	0.044937	-0.430327	0.079956	0.033884	0.035019
chr6:47360661-47360702	-0.180097	0.044267	-0.224649	0.06791	-0.044552	0.023643
chr6:47638956-47638997	-0.116004	0.067336	-0.116004	0.10094	0	0.033604
chr6:52304874-52304915	-0.673642	0.076881	-0.553755	0.04748	0.119887	-0.029401
chr6:52414744-52414785	-0.497275	0.044371	-0.497275	0.064866	0	0.020495
chr6:53342632-53342673	-0.266006	0.086267	-0.205952	0.072668	0.060054	-0.013599
chr6:70616311-70616352	0.0319202	0.097792	0.0612684	0.081939	0.0293482	-0.015853
chr6:70616311-70616352	0.0319202	0.097792	0.0432178	0.081939	0.0112976	-0.015853
chr6:109241366-109241407	-0.242152	0.061953	-0.216722	0.060305	0.02543	-0.001648
chr6:109241366-109241407	-0.242152	0.061953	-0.105229	0.060305	0.136923	-0.001648
chr6:110391768-110391809	0.0492769	0.084203	0.12616	0.064489	0.0768831	-0.019714
chr6:110396270-110396311	0.0996536	0.12488	0.0577661	0.053922	-0.0418875	-0.070958
chr6:110396270-110396311	0.0996536	0.12488	0.0996536	0.051238	0	-0.073642
chr6:116399331-116399372	-0.0522706	0.088545	-0.062624	0.065635	-0.0103534	-0.02291
chr6:116399331-116399372	-0.0522706	0.088545	-0.0522706	0.065635	0	-0.02291
chr6:118894718-118894759	0.02285	0.10419	0.0401849	0.073126	0.0173349	-0.031064
chr6:118894718-118894759	0.02285	0.10419	0.0214209	0.073126	-0.0014291	-0.031064
chr6:135210293-135210334	-0.303008	0.13147	-0.148697	0.057969	0.154311	-0.073501
chr6:135210293-135210334	-0.303008	0.13147	-0.202824	0.057969	0.100184	-0.073501
chr6:142946363-142946404	-0.121218	0.042736	-0.121218	0.073126	0	0.03039
chr6:142946363-142946404	-0.121218	0.042736	-0.177277	0.073126	-0.056059	0.03039
chr6:145687981-145688022	-0.175128	0.10431	-0.163952	0.15134	0.011176	0.04703
chr6:145687981-145688022	-0.175128	0.10431	-0.163159	0.15134	0.011969	0.04703
chr6:147359203-147359244	-0.160597	0.079343	-0.135894	0.063802	0.024703	-0.015541
chr6:147359203-147359244	-0.160597	0.079343	-0.0414903	0.059259	0.119107	-0.020084
chr6:156617545-156617586	-0.477695	0.08115	-0.523172	0.047926	-0.045477	-0.033224
chr6:156617545-156617586	-0.477695	0.08115	-0.522427	0.047926	-0.044732	-0.033224
chr6:157419135-157419176	-0.204224	0.10392	-0.204224	0.047926	0	-0.055994
chr6:157419135-157419176	-0.204224	0.10392	-0.183944	0.047926	0.02028	-0.055994
chr6:157671596-157671637	-0.141625	0.091161	-0.141625	0.057981	0	-0.03318
chr7:966917-966958	0.0737328	0.11092	0.0371722	0.073126	-0.0365606	-0.037794
chr7:2256897-2256938	-0.184862	0.11092	-0.184862	0.073126	0	-0.037794
chr7:2256897-2256938	-0.184862	0.11092	-0.165846	0.073126	0.019016	-0.037794
chr7:2522548-2522589	-0.232083	0.10642	-0.208221	0.073126	0.023862	-0.033294
chr6:28828059-28828100	-0.231001	0.10392	-0.24728	0.083283	-0.016279	-0.020637
chr6:29143978-29144019	-0.283775	0.0763	-0.206109	0.047944	0.077666	-0.028356
chr6:29580292-29580333	-0.0558947	0.14006	-0.0421994	0.10094	0.0136953	-0.03912
chr6:29580292-29580333	-0.0558947	0.14006	-0.119996	0.10094	-0.0641013	-0.03912
chr6:29580292-29580333	-0.0558947	0.14006	-0.0558947	0.10094	0	-0.03912
chr6:30018527-30018568	-0.13832	0.10101	-0.13832	0.067019	0	-0.033991
chr6:30018527-30018568	-0.13832	0.10101	-0.138118	0.061249	0.000202	-0.039761
chr6:36864307-36864348	-0.0158771	0.11082	-0.170091	0.10391	-0.154214	-0.00691
chr6:26408303-26408344	-0.184501	0.049301	-0.184501	0.064792	0	0.015491
chr6:26408303-26408344	-0.184501	0.049301	-0.0378095	0.064792	0.146692	0.015491
chr9:25235045-25235086	0.134725	0.19425	-0.00559993	0.073126	-0.140325	-0.121124
chr11:90226449-90226490	-0.426873	0.075046	-0.259125	0.04069	0.167748	-0.034356
chr11:90226449-90226490	-0.426873	0.075046	-0.378178	0.069442	0.048695	-0.005604
chr1:72359441-72359482	-0.178167	0.091161	-0.178167	0.071436	0	-0.019725
chr6:31338623-31338664	-0.0912541	0.05794	0.0545613	0.1094	0.145815	0.05146
chr6:27444587-27444628	-0.0404323	0.086825	-0.0404323	0.064792	0	-0.022033
chr6:27444587-27444628	-0.0404323	0.086825	-0.0242737	0.064792	0.0161586	-0.022033
chr6:32609836-32609877	0.0203773	0.084233	0.0203773	0.10603	0	0.021797
chr9:17044953-17044994	-0.169727	0.070705	-0.108522	0.049397	0.061205	-0.021308
chr9:17044953-17044994	-0.169727	0.070705	-0.169727	0.060083	0	-0.010622
chr6:65967025-65967066	-0.106491	0.086643	-0.173288	0.064866	-0.066797	-0.021777
chr6:28139029-28139070	0.123634	0.065297	0.0638934	0.08447	-0.0597406	0.019173
chr10:104694894-104694935	-0.186426	0.074686	-0.197776	0.056989	-0.01135	-0.017697
chr10:104694894-104694935	-0.186426	0.074686	-0.285269	0.05832	-0.098843	-0.016366
chr14:74768107-74768148	-0.311334	0.10457	-0.339187	0.16459	-0.027853	0.06002
chr14:74768107-74768148	-0.311334	0.10457	-0.311334	0.16459	0	0.06002
chr5:165057922-165057963	0.0454796	0.11267	0.178418	0.077129	0.132938	-0.035541
chr5:165057922-165057963	0.0454796	0.11267	0.0805646	0.077129	0.035085	-0.035541
chr7:12210732-12210773	-0.137759	0.10939	-0.201322	0.073126	-0.063563	-0.036264
chr5:104636636-104636677	0.0123955	0.096495	0.0123955	0.054368	0	-0.042127
chr5:104636636-104636677	0.0123955	0.096495	0.00878245	0.051406	-0.00361305	-0.045089
chr11:88972047-88972088	0.125385	0.10419	0.11305	0.088537	-0.012335	-0.015653
chr6:24275235-24275276	-0.0323865	0.10419	-0.0323865	0.10157	0	-0.00262
chr2:124218566-124218607	-0.23819	0.050774	-0.112025	0.064081	0.126165	0.013307
chr2:124218566-124218607	-0.23819	0.050774	-0.23819	0.078823	0	0.028049
chr18:37558262-37558303	-0.055775	0.10419	-0.0503969	0.081338	0.0053781	-0.022852
chr18:37558262-37558303	-0.055775	0.10419	-0.0789303	0.081338	-0.0231553	-0.022852
chr14:85574796-85574837	-0.149595	0.084233	-0.149595	0.067252	0	-0.016981
chr14:95517618-95517659	-0.103159	0.08921	-0.100594	0.10094	0.002565	0.01173
chr15:64743760-64743801	-0.276752	0.059938	-0.336673	0.11838	-0.059921	0.058442
chr15:73372362-73372403	0.112667	0.10642	0.04273	0.079012	-0.069937	-0.027408
chr15:84829394-84829435	-0.290967	0.067655	-0.290967	0.068359	0	0.000704
chr15:95917650-95917691	-0.0366594	0.081804	0.14024	0.082031	0.176899	0.000227
chr16:1778009-1778050	-0.173965	0.11092	-0.15838	0.081258	0.015585	-0.029662
chr16:1778009-1778050	-0.173965	0.11092	-0.129131	0.07716	0.044834	-0.03376
chr16:4232263-4232304	-0.114357	0.08911	-0.0841705	0.071979	0.0301865	-0.017131
chr16:54564405-54564446	-0.043501	0.11082	-0.0740065	0.24888	-0.0305055	0.13806
chr16:58550848-58550889	-0.189262	0.053268	-0.189262	0.065635	0	0.012367
chr16:86151013-86151054	-0.186007	0.0763	-0.156368	0.1076	0.029639	0.0313
chr16:88486770-88486811	0.0593057	0.12586	0.00544257	0.052728	-0.0538631	-0.073132
chr16:88486770-88486811	0.0593057	0.12586	-0.0914111	0.052728	-0.150717	-0.073132
chr17:4897848-4897889	-0.310284	0.0763	-0.179184	0.071979	0.1311	-0.004321
chr17:4897848-4897889	-0.310284	0.0763	-0.310284	0.071979	0	-0.004321
chr17:50588683-50588724	-0.122708	0.10991	-0.179749	0.073126	-0.057041	-0.036784
chr17:63910025-63910066	0.0903525	0.077301	0.16948	0.073126	0.0791275	-0.004175
chr17:66309995-66310036	-0.103535	0.080063	-0.122012	0.10603	-0.018477	0.025967
chr17:79807906-79807947	0.0824273	0.10939	0.0344683	0.071979	-0.047959	-0.037411
chr17:79807906-79807947	0.0824273	0.10939	0.0824273	0.071173	0	-0.038217
chr18:28759605-28759646	-0.100189	0.067336	-0.138179	0.082035	-0.03799	0.014699
chr18:32449158-32449199	0.299904	0.15754	0.332006	0.16703	0.032102	0.00949
chr18:34819275-34819316	0.11292	0.082943	0.11292	0.074884	0	-0.008059
chr18:59471705-59471746	-0.0165823	0.096495	-0.0165823	0.055145	0	-0.04135
chr19:1217541-1217582	-0.154919	0.062693	-0.104286	0.073126	0.050633	0.010433
chr19:7516338-7516379	-0.0783764	0.045606	-0.089258	0.10093	-0.0108816	0.055324
chr19:7516338-7516379	-0.0783764	0.045606	-0.072725	0.10093	0.0056514	0.055324
chr19:18622525-18622566	-0.155188	0.0763	-0.162288	0.059744	-0.0071	-0.016556
chr19:18622525-18622566	-0.155188	0.0763	-0.143892	0.066469	0.011296	-0.009831
chr20:4050986-4051027	-0.0792778	0.20081	-0.0792778	0.059817	0	-0.140993
chr20:38204104-38204145	0.0260172	0.18487	-0.101832	0.088537	-0.127849	-0.096333
chr22:23841668-23841709	-0.120653	0.081804	-0.0378599	0.073126	0.0827931	-0.008678
chr22:41458422-41458463	-0.0370159	0.19425	-0.155803	0.10603	-0.118787	-0.08822
chr1:2212648-2212689	-0.300958	0.11186	-0.209834	0.065635	0.091124	-0.046225
chr1:2212648-2212689	-0.300958	0.11186	-0.300958	0.050204	0	-0.061656
chr1:39188680-39188721	-0.191259	0.11251	-0.29056	0.07716	-0.099301	-0.03535
chr1:50754325-50754366	-0.00706404	0.11303	-0.0689914	0.10157	-0.0619274	-0.01146
chr1:112017595-112017636	-0.519239	0.06516	-0.427578	0.066283	0.091661	0.001123
chr1:155170431-155170472	-0.649808	0.06001	-0.806537	0.06445	-0.156729	0.00444
chr1:155170431-155170472	-0.649808	0.06001	-0.649808	0.06445	0	0.00444
chr1:228263147-228263188	-0.00587432	0.080831	-0.00587432	0.066283	0	-0.014548
chr2:8616033-8616074	-0.154545	0.060564	-0.158811	0.060439	-0.004266	-0.000125
chr2:8616033-8616074	-0.154545	0.060564	-0.145915	0.060439	0.00863	-0.000125
chr2:40516023-40516064	-0.256216	0.071627	-0.205086	0.1174	0.05113	0.045773
chr2:40516023-40516064	-0.256216	0.071627	-0.20985	0.1174	0.046366	0.045773
chr2:66529824-66529865	-0.198519	0.21991	-0.126203	0.10335	0.072316	-0.11656
chr2:102799015-102799056	-0.0208098	0.064063	-0.142438	0.063879	-0.121628	-0.000184
chr2:163491227-163491268	0.0126028	0.099217	-0.0661447	0.068819	-0.0787475	-0.030398
chr2:178693619-178693660	-0.0386678	0.099967	-0.00780638	0.07716	0.0308614	-0.022807
chr2:178693619-178693660	-0.0386678	0.099967	-0.0026423	0.07716	0.0360255	-0.022807
chr3:38725804-38725845	-0.183215	0.052475	-0.183215	0.094481	0	0.042006
chr3:38725804-38725845	-0.183215	0.052475	-0.185415	0.055038	-0.0022	0.002563
chr3:53736541-53736582	-0.154595	0.062527	-0.0647194	0.094481	0.0898756	0.031954
chr3:66311762-66311803	-0.20051	0.09104	-0.20051	0.07716	0	-0.01388
chr3:69353630-69353671	0.252253	0.10642	0.268238	0.066283	0.015985	-0.040137
chr4:60737367-60737408	0.196298	0.34259	0.218815	0.081939	0.022517	-0.260651
chr3:73505751-73505792	0.122997	0.10831	0.122997	0.049968	0	-0.058342
chr3:73505751-73505792	0.122997	0.10831	-0.33048	0.049968	-0.453477	-0.058342
chr3:111924694-111924735	-0.192835	0.064063	-0.10657	0.083283	0.086265	0.01922
chr10:86749311-86749352	-0.605291	0.078304	-0.605291	0.08447	0	0.006166
chr10:114022282-114022323	-0.195669	0.10991	-0.3983	0.054028	-0.202631	-0.055882
chr10:121589128-121589169	-0.212771	0.067526	-0.229559	0.079012	-0.016788	0.011486
chr11:30410609-30410650	-0.0917808	0.10392	-0.258964	0.062119	-0.167183	-0.041801
chr11:30410609-30410650	-0.0917808	0.10392	-0.20566	0.062119	-0.113879	-0.041801
chr11:32351206-32351247	-0.294157	0.10991	-0.294157	0.082035	0	-0.027875
chr11:65623826-65623867	0.0337726	0.13147	0.0337726	0.10603	0	-0.02544
chr11:65623826-65623867	0.0337726	0.13147	0.00385235	0.10603	-0.0299202	-0.02544
chr11:111905322-111905363	-0.405157	0.074556	-0.488242	0.11998	-0.083085	0.045424
chr11:111905322-111905363	-0.405157	0.074556	-0.481508	0.11998	-0.076351	0.045424
chr11:113795593-113795634	-0.0696441	0.074556	-0.140912	0.060703	-0.0712679	-0.013853
chr12:20391407-20391448	0.421952	0.074556	0.216245	0.071436	-0.205707	-0.00312
chr12:26153531-26153572	0.42121	0.19493	0.42121	0.035865	0	-0.159065
chr12:45815717-45815758	0.043115	0.16164	-0.0174765	0.046614	-0.0605915	-0.115026
chr12:63889214-63889255	-0.12488	0.13147	-0.163921	0.10094	-0.039041	-0.03053
chr12:66000864-66000905	-0.247632	0.043169	-0.252417	0.13286	-0.004785	0.089691
chr12:66000864-66000905	-0.247632	0.043169	-0.247632	0.13286	0	0.089691
chr12:84412499-84412540	-0.115988	0.12488	-0.0815887	0.10835	0.0343993	-0.01653
chr12:104110008-104110049	-0.0561872	0.10843	0.170031	0.049968	0.226218	-0.058462
chr12:106772324-106772365	-0.0629831	0.15704	-0.0311061	0.087806	0.031877	-0.069234
chr12:109539068-109539109	-0.499698	0.086515	-0.445138	0.042135	0.05456	-0.04438
chr12:117053999-117054040	0.570559	0.34259	0.430987	0.045247	-0.139572	-0.297343
chr13:38686994-38687035	0.035223	0.10939	0.104294	0.048177	0.069071	-0.061213
chr13:102225899-102225940	-0.109995	0.10392	-0.148134	0.16703	-0.038139	0.06311
chr14:21077051-21077092	-0.142212	0.082388	-0.112837	0.13286	0.029375	0.050472
chr14:21077051-21077092	-0.142212	0.082388	-0.152851	0.13286	-0.010639	0.050472
chr14:29281018-29281059	0.182684	0.11092	0.121401	0.074664	-0.061283	-0.036256
chr14:32454110-32454151	-0.166992	0.085674	-0.236068	0.076626	-0.069076	-0.009048
chr14:35401991-35402032	-0.0983654	0.10392	-0.0457735	0.07716	0.0525919	-0.02676
chr14:35401991-35402032	-0.0983654	0.10392	-0.0774759	0.07716	0.0208895	-0.02676
chr14:63990900-63990941	-0.200642	0.10541	-0.200642	0.073126	0	-0.032284
chr14:103523535-103523576	-0.0525533	0.058305	-0.0525533	0.073126	0	0.014821
chr16:4273946-4273987	-0.139716	0.10419	-0.176308	0.071979	-0.036592	-0.032211
chr17:63915757-63915798	-0.0820649	0.099967	-0.21026	0.069202	-0.128195	-0.030765
chr1:21957478-21957519	-0.0152848	0.10431	-0.0152848	0.07716	0	-0.02715
chr1:36220117-36220158	-0.971745	0.10431	-0.87395	0.081939	0.097795	-0.022371
chr1:200302260-200302301	-0.0859216	0.086381	-0.0404814	0.052468	0.0454402	-0.033913
chr1:200302260-200302301	-0.0859216	0.086381	-0.0274033	0.052468	0.0585183	-0.033913
chr2:42310835-42310876	-0.0847721	0.075046	-0.0507161	0.15134	0.034056	0.076294
chr2:202508287-202508328	-0.56554	0.089214	-0.483757	0.073126	0.081783	-0.016088
chr2:216763344-216763385	-0.0188713	0.10101	0.075442	0.074884	0.0943133	-0.026126
chr3:158616082-158616123	-0.0847528	0.067783	-0.0885536	0.09888	-0.0038008	0.031097
chr4:119148904-119148945	-0.370126	0.067312	-0.233086	0.071915	0.13704	0.004603
chr5:108874583-108874624	-0.388041	0.1337	-0.388041	0.056078	0	-0.077622
chr6:133893367-133893408	-0.101858	0.082974	-0.0774605	0.066736	0.0243975	-0.016238
chr6:133893367-133893408	-0.101858	0.082974	-0.117615	0.066736	-0.015757	-0.016238
chr8:102902118-102902159	-0.177796	0.078323	-0.20016	0.081794	-0.022364	0.003471
chr10:32559014-32559055	-0.150832	0.05946	-0.16253	0.073126	-0.011698	0.013666
chr12:66010824-66010865	0.0942078	0.13246	0.0907653	0.079059	-0.0034425	-0.053401
chr12:66010824-66010865	0.0942078	0.13246	0.0766945	0.061413	-0.0175133	-0.071047
chr14:21074587-21074628	-0.094829	0.15029	-0.094829	0.073126	0	-0.077164
chr14:21074587-21074628	-0.094829	0.15029	-0.0915445	0.073126	0.0032845	-0.077164
chr16:15740852-15740893	-0.184943	0.10677	-0.199219	0.1174	-0.014276	0.01063
chr16:86088898-86088939	-0.15667	0.10939	-0.15667	0.04457	0	-0.06482
chr17:75509071-75509112	-0.191275	0.072917	-0.191275	0.078639	0	0.005722
chr2:47923428-47923469	-0.0844971	0.076881	-0.0498693	0.10157	0.0346278	0.024689
chr7:37358490-37358531	0.244049	0.34259	0.203306	0.082031	-0.040743	-0.260559
chr8:30444929-30444970	-0.217871	0.11251	-0.217871	0.081939	0	-0.030571
chr8:30444929-30444970	-0.217871	0.11251	-0.16024	0.081939	0.057631	-0.030571
chr20:41437457-41437498	-0.0765107	0.071005	-0.0765107	0.1174	0	0.046395
chr1:61429565-61429606	-0.191692	0.062491	-0.189933	0.15229	0.001759	0.089799
chr1:168722879-168722920	-0.157822	0.10457	-0.103608	0.10094	0.054214	-0.00363
chr2:186169057-186169098	-0.306564	0.053606	-0.269117	0.09888	0.037447	0.045274
chr3:123398298-123398339	-0.031314	0.11251	-0.0647606	0.10603	-0.0334466	-0.00648
chr5:128963566-128963607	-0.188064	0.058326	-0.189803	0.1094	-0.001739	0.051074
chr7:136884649-136884690	-0.0862945	0.19058	-0.0800975	0.060148	0.006197	-0.130432
chr8:21918307-21918348	-0.0207459	0.08921	-0.0218219	0.10094	-0.001076	0.01173
chr9:116552552-116552593	-0.120362	0.10642	-0.0746898	0.051406	0.0456722	-0.055014
chr9:116552552-116552593	-0.120362	0.10642	0.0616	0.051406	0.181962	-0.055014
chr10:13492214-13492255	-0.172212	0.081256	-0.217591	0.24888	-0.045379	0.167624
chr10:13492214-13492255	-0.172212	0.081256	-0.205734	0.24888	-0.033522	0.167624
chr2:67852059-67852100	-0.281606	0.045884	-0.279524	0.08447	0.002082	0.038586
chr16:67424328-67424369	-0.0800637	0.10831	-0.0800637	0.042066	0	-0.066244
chr16:67424328-67424369	-0.0800637	0.10831	0.0328949	0.042066	0.112959	-0.066244
chr16:69708464-69708505	0.214904	0.19317	0.174264	0.071979	-0.04064	-0.121191
chr16:69708464-69708505	0.214904	0.19317	0.153137	0.10335	-0.061767	-0.08982
chr16:81837344-81837385	-0.222336	0.08567	-0.185328	0.064081	0.037008	-0.021589
chr16:81837344-81837385	-0.222336	0.08567	-0.253155	0.050002	-0.030819	-0.035668
chr16:81855997-81856038	-0.18394	0.085921	-0.0979806	0.071979	0.0859594	-0.013942
chr16:81937778-81937819	0.012554	0.062282	-0.157846	0.07716	-0.1704	0.014878
chr16:81937778-81937819	0.012554	0.062282	-0.0976444	0.07716	-0.110198	0.014878
chr16:84548197-84548238	-0.176469	0.084529	-0.240288	0.050002	-0.063819	-0.034527
chr16:85382000-85382041	-0.330409	0.089146	-0.34172	0.062602	-0.011311	-0.026544
chr16:85382000-85382041	-0.330409	0.089146	-0.323496	0.062602	0.006913	-0.026544
chr16:85404002-85404043	-0.162336	0.091161	-0.162336	0.073126	0	-0.018035
chr16:85672791-85672832	-0.239026	0.076881	-0.239026	0.17246	0	0.095579
chr16:88948443-88948484	-0.0960589	0.063643	-0.19557	0.069989	-0.0995111	0.006346
chr16:88948443-88948484	-0.0960589	0.063643	-0.0953031	0.069989	0.0007558	0.006346
chr16:89258756-89258797	-0.511755	0.089214	-0.630523	0.11456	-0.118768	0.025346
chr17:1383429-1383470	-0.0429726	0.19425	-0.140171	0.10603	-0.0971984	-0.08822
chr17:1490473-1490514	-0.578779	0.067196	-0.530656	0.080149	0.048123	0.012953
chr17:1631740-1631781	-0.0661525	0.09264	-0.0768473	0.1094	-0.0106948	0.01676
chr17:2649838-2649879	-0.132564	0.053845	-0.132564	0.079012	0	0.025167
chr17:3915306-3915347	-0.030938	0.13147	-0.030938	0.04303	0	-0.08844
chr17:4932312-4932353	-0.0597963	0.10991	-0.0483423	0.050002	0.011454	-0.059908
chr17:4933066-4933107	-0.113772	0.089214	-0.153315	0.04949	-0.039543	-0.039724
chr17:4933066-4933107	-0.113772	0.089214	-0.156026	0.04949	-0.042254	-0.039724
chr17:4933880-4933921	-0.060984	0.11092	-0.0623651	0.071979	-0.0013811	-0.038941
chr17:4945952-4945993	-0.0279936	0.10431	-0.0315628	0.073126	-0.0035692	-0.031184
chr17:5359434-5359475	-0.0766126	0.10843	-0.00156981	0.11998	0.0750428	0.01155
chr17:5391403-5391444	-0.344215	0.10101	-0.222174	0.075272	0.122041	-0.025738
chr17:7007649-7007690	-0.182975	0.11251	-0.0198668	0.07716	0.163108	-0.03535
chr17:7491002-7491043	-0.137914	0.10431	-0.201298	0.059259	-0.063384	-0.045051
chr17:7491002-7491043	-0.137914	0.10431	-0.193435	0.055038	-0.055521	-0.049272
chr15:52375233-52375274	-0.285408	0.073588	-0.246922	0.07355	0.038486	-3.8e-05
chr15:57006743-57006784	-0.476061	0.070705	-0.607393	0.058817	-0.131332	-0.011888
chr15:63049777-63049818	-0.328045	0.054448	-0.230637	0.1498	0.097408	0.095352
chr15:63049777-63049818	-0.328045	0.054448	-0.227112	0.1498	0.100933	0.095352
chr15:63071271-63071312	-0.256031	0.053606	-0.289102	0.063879	-0.033071	0.010273
chr15:64889061-64889102	0.0344179	0.13734	-0.0146595	0.07635	-0.0490774	-0.06099
chr15:64889061-64889102	0.0344179	0.13734	-0.0558784	0.07635	-0.0902963	-0.06099
chr15:66317323-66317364	-0.93321	0.046605	-0.93321	0.04081	0	-0.005795
chr15:75407162-75407203	0.0177754	0.11365	0.0177754	0.1094	0	-0.00425
chr15:89068306-89068347	-0.417855	0.084203	-0.35015	0.063879	0.067705	-0.020324
chr15:90000791-90000832	-0.039894	0.044882	-0.039894	0.071979	0	0.027097
chr15:90035290-90035331	-0.109188	0.068285	-0.143583	0.063879	-0.034395	-0.004406
chr15:90035290-90035331	-0.109188	0.068285	-0.109188	0.063879	0	-0.004406
chr15:90969017-90969058	-0.381242	0.053207	-0.234666	0.1174	0.146576	0.064193
chr15:90969017-90969058	-0.381242	0.053207	-0.272886	0.1174	0.108356	0.064193
chr16:477465-477506	-0.200398	0.044903	-0.205153	0.055093	-0.004755	0.01019
chr16:477465-477506	-0.200398	0.044903	-0.159058	0.071979	0.04134	0.027076
chr16:4289663-4289704	-0.488991	0.056484	-0.532495	0.059259	-0.043504	0.002775
chr16:4852017-4852058	-0.0416336	0.10457	-0.0416336	0.10094	0	-0.00363
chr16:4974020-4974061	-0.120579	0.13147	-0.120579	0.099993	0	-0.031477
chr16:4974020-4974061	-0.120579	0.13147	-0.115803	0.099993	0.004776	-0.031477
chr16:8947617-8947658	0.228258	0.20081	0.154267	0.10094	-0.073991	-0.09987
chr16:15722269-15722310	-0.0333933	0.20081	-0.0687168	0.082031	-0.0353235	-0.118779
chr16:24749705-24749746	-0.436528	0.086005	-0.359752	0.064489	0.076776	-0.021516
chr16:24749705-24749746	-0.436528	0.086005	-0.436528	0.081794	0	-0.004211
chr16:28494319-28494360	-0.156742	0.10392	-0.156742	0.12214	0	0.01822
chr16:28494319-28494360	-0.156742	0.10392	-0.189527	0.12214	-0.032785	0.01822
chr16:29809139-29809180	-0.196772	0.10062	-0.161202	0.052468	0.03557	-0.048152
chr16:29809139-29809180	-0.196772	0.10062	-0.196772	0.052468	0	-0.048152
chr16:30091819-30091860	-0.0311331	0.066581	-0.0240478	0.050002	0.0070853	-0.016579
chr16:30091819-30091860	-0.0311331	0.066581	-0.0311331	0.071979	0	0.005398
chr16:30689517-30689558	-0.476702	0.063643	-0.362555	0.10074	0.114147	0.037097
chr16:53072291-53072332	-0.314231	0.091567	-0.259675	0.052992	0.054556	-0.038575
chr16:53072291-53072332	-0.314231	0.091567	-0.29726	0.050075	0.016971	-0.041492
chr16:53206354-53206395	-0.723847	0.061953	-0.723847	0.071979	0	0.010026
chr18:3441149-3441190	0.278919	0.11555	0.201319	0.057969	-0.0776	-0.057581
chr18:3608668-3608709	-0.0336943	0.098917	-0.089691	0.14744	-0.0559967	0.048523
chr18:3652488-3652529	-0.540051	0.085674	-0.656092	0.11456	-0.116041	0.028886
chr18:12882340-12882381	-0.0173079	0.09264	-0.0173079	0.24888	0	0.15624
chr18:44460394-44460435	-0.223931	0.077301	-0.223931	0.17246	0	0.095159
chr18:45723104-45723145	-0.032374	0.14006	-0.0722835	0.20852	-0.0399095	0.06846
chr18:45723104-45723145	-0.032374	0.14006	-0.0713403	0.20852	-0.0389663	0.06846
chr18:46262049-46262090	-0.0640218	0.089146	-0.146417	0.099993	-0.0823952	0.010847
chr18:46265898-46265939	0.164888	0.098048	0.164888	0.045829	0	-0.052219
chr18:46265898-46265939	0.164888	0.098048	0.162942	0.045829	-0.001946	-0.052219
chr18:63253601-63253642	-0.0562534	0.11251	-0.00368582	0.080149	0.0525676	-0.032361
chr18:63253601-63253642	-0.0562534	0.11251	-0.0562534	0.080149	0	-0.032361
chr2:173345074-173345115	-0.149377	0.053155	-0.156948	0.072668	-0.007571	0.019513
chr2:173354387-173354428	-0.193139	0.075046	-0.193139	0.082035	0	0.006989
chr2:173354387-173354428	-0.193139	0.075046	-0.187384	0.082035	0.005755	0.006989
chr2:173999133-173999174	-0.0557857	0.274	-0.0557857	0.18127	0	-0.09273
chr2:181447525-181447566	-0.159474	0.098917	-0.159474	0.064489	0	-0.034428
chr2:196141900-196141941	-0.341293	0.066173	-0.341293	0.054028	0	-0.012145
chr2:197343180-197343221	-0.948984	0.045812	-0.948984	0.074784	0	0.028972
chr2:200829934-200829975	-0.149455	0.09104	-0.158778	0.071979	-0.009323	-0.019061
chr2:203226735-203226776	-0.523569	0.044882	-0.622783	0.059817	-0.099214	0.014935
chr2:206220077-206220118	0.349329	1.2797	0.303267	0.073126	-0.046062	-1.20657
chr2:219191487-219191528	-0.933086	0.045812	-0.860067	0.05614	0.073019	0.010328
chr2:223102231-223102272	-0.116067	0.097792	-0.116067	0.073126	0	-0.024666
chr2:226235118-226235159	-0.160677	0.088545	-0.131026	0.11856	0.029651	0.030015
chr2:226235118-226235159	-0.160677	0.088545	-0.160677	0.11856	0	0.030015
chr2:226426995-226427036	-0.200444	0.067988	-0.290741	0.10094	-0.090297	0.032952
chr2:226426995-226427036	-0.200444	0.067988	-0.200444	0.10094	0	0.032952
chr2:230877976-230878017	-0.477716	0.053568	-0.161356	0.085835	0.31636	0.032267
chr2:235456686-235456727	0.0820137	0.19638	0.163063	0.15747	0.0810493	-0.03891
chr2:240571466-240571507	-0.161274	0.11092	0.0436043	0.059259	0.204878	-0.051661
chr2:240571466-240571507	-0.161274	0.11092	-0.166236	0.059259	-0.004962	-0.051661
chr2:241302271-241302312	-0.123851	0.19638	-0.229696	0.081939	-0.105845	-0.114441
chr3:12227746-12227787	0.158033	0.08009	-0.0204767	0.087265	-0.17851	0.007175
chr3:12227746-12227787	0.158033	0.08009	0.0697779	0.087265	-0.0882551	0.007175
chr3:16857330-16857371	-0.0329658	0.08115	-0.0448999	0.082035	-0.0119341	0.000885
chr3:16888074-16888115	-0.110121	0.084136	-0.117113	0.077964	-0.006992	-0.006172
chr3:16929426-16929467	-0.0155869	0.098048	-0.0660409	0.12707	-0.050454	0.029022
chr3:16929426-16929467	-0.0155869	0.098048	-0.111211	0.12707	-0.0956241	0.029022
chr3:17056887-17056928	-0.195348	0.074686	-0.187971	0.16512	0.007377	0.090434
chr3:20064161-20064202	-0.24862	0.10043	-0.182332	0.091992	0.066288	-0.008438
chr3:24306289-24306330	-0.171576	0.10642	-0.171576	0.086519	0	-0.019901
chr3:24306289-24306330	-0.171576	0.10642	-0.122509	0.086519	0.049067	-0.019901
chr3:25504799-25504840	-0.0724801	0.19425	-0.147584	0.1174	-0.0751039	-0.07685
chr3:38165528-38165569	-0.14435	0.10642	-0.206366	0.073126	-0.062016	-0.033294
chr3:49664530-49664571	-0.140801	0.073206	-0.151372	0.064792	-0.010571	-0.008414
chr3:49932857-49932898	-0.919634	0.063235	-0.699272	0.045829	0.220362	-0.017406
chr3:67375519-67375560	-0.43976	0.081804	-0.2424	0.082031	0.19736	0.000227
chr3:71207138-71207179	0.10513	0.2221	0.159653	0.073126	0.054523	-0.148974
chr3:88002431-88002472	-0.173833	0.13734	-0.487425	0.081939	-0.313592	-0.055401
chr3:121626227-121626268	-0.0680183	0.08911	0.0570806	0.1094	0.125099	0.02029
chr3:122374703-122374744	-0.0277132	0.08704	-0.0404683	0.081338	-0.0127551	-0.005702
chr3:123386776-123386817	-0.179321	0.072917	-0.138708	0.073126	0.040613	0.000209
chr3:125202834-125202875	0.362738	1.2797	0.299185	0.071979	-0.063553	-1.20772
chr3:128592541-128592582	-0.0551739	0.097792	-0.154772	0.05862	-0.0995981	-0.039172
chr3:128603754-128603795	-0.241964	0.077319	-0.140045	0.087265	0.101919	0.009946
chr3:128603754-128603795	-0.241964	0.077319	-0.159041	0.073126	0.082923	-0.004193
chr3:133757905-133757946	-0.0797336	0.082931	-0.0732548	0.078823	0.0064788	-0.004108
chr3:133757905-133757946	-0.0797336	0.082931	-0.0797336	0.078823	0	-0.004108
chr3:138244263-138244304	-0.22752	0.072917	-0.295714	0.080149	-0.068194	0.007232
chr17:46018081-46018122	0.154845	0.19425	0.117593	0.057981	-0.037252	-0.136269
chr17:46135523-46135564	-0.902431	0.085674	-0.902431	0.040171	0	-0.045503
chr17:47502752-47502793	0.18309	0.084496	0.218671	0.21058	0.035581	0.126084
chr17:49346358-49346399	-0.99364	0.089457	-0.947389	0.047944	0.046251	-0.041513
chr17:49711402-49711443	0.173772	0.085674	0.161643	0.17246	-0.012129	0.086786
chr17:49779527-49779568	-0.170651	0.15029	-0.178693	0.071979	-0.008042	-0.078311
chr17:49779527-49779568	-0.170651	0.15029	-0.148403	0.048064	0.022248	-0.102226
chr17:49779942-49779983	0.00276823	0.091161	0.00276823	0.10335	0	0.012189
chr17:49805794-49805835	0.022824	0.082974	0.022824	0.078823	0	-0.004151
chr17:55193439-55193480	0.0964645	0.084233	0.153583	0.1094	0.0571185	0.025167
chr17:59887919-59887960	-0.684989	0.047334	-0.684989	0.1094	0	0.062066
chr17:61652637-61652678	-0.177079	0.060564	-0.177079	0.055093	0	-0.005471
chr17:73219648-73219689	-0.97183	0.054118	-1.01906	0.10157	-0.04723	0.047452
chr17:76387007-76387048	-0.217918	0.10831	-0.217918	0.065635	0	-0.042675
chr17:76461960-76462001	-0.170037	0.084136	-0.206772	0.071979	-0.036735	-0.012157
chr17:78125217-78125258	-0.202691	0.08465	-0.202691	0.057981	0	-0.026669
chr17:78187132-78187173	-0.10905	0.050601	-0.111336	0.078505	-0.002286	0.027904
chr17:78187132-78187173	-0.10905	0.050601	-0.120859	0.078505	-0.011809	0.027904
chr17:78395552-78395593	-0.292961	0.045537	-0.292961	0.065635	0	0.020098
chr17:78395552-78395593	-0.292961	0.045537	-0.19822	0.065635	0.094741	0.020098
chr17:80018285-80018326	-0.469667	0.045812	-0.42067	0.067202	0.048997	0.02139
chr17:80138058-80138099	0.196087	0.086267	0.0734695	0.10335	-0.122618	0.017083
chr17:81558614-81558655	-0.0896488	0.086267	-0.124126	0.24673	-0.0344772	0.160463
chr17:81558614-81558655	-0.0896488	0.086267	-0.14312	0.24673	-0.0534712	0.160463
chr17:82520981-82521022	-0.153916	0.098048	-0.153916	0.15747	0	0.059422
chr17:82520981-82521022	-0.153916	0.098048	-0.13236	0.063802	0.021556	-0.034246
chr18:660422-660463	-0.120463	0.086643	-0.120463	0.058817	0	-0.027826
chr18:2987020-2987061	-0.0418998	0.073588	0.0141346	0.078123	0.0560344	0.004535
chr2:45045653-45045694	0.137696	0.085674	0.0363465	0.12069	-0.101349	0.035016
chr2:176247071-176247112	0.241945	0.10392	0.206129	0.09888	-0.035816	-0.00504
chr2:176247071-176247112	0.241945	0.10392	0.241945	0.09888	0	-0.00504
chr2:222207280-222207321	0.0130872	0.059938	-0.00556615	0.10093	-0.0186533	0.040992
chr3:54690513-54690554	-0.024166	0.074556	-0.0520805	0.21058	-0.0279145	0.136024
chr4:121076929-121076970	-0.151463	0.21991	-0.174823	0.10335	-0.02336	-0.11656
chr17:71146467-71146508	-0.156865	0.059137	-0.192314	0.1174	-0.035449	0.058263
chr1:243451383-243451424	-0.288541	0.10419	-0.251119	0.04081	0.037422	-0.06338
chr14:64743171-64743212	-0.0651974	0.099217	-0.0348088	0.071979	0.0303886	-0.027238
chr14:64761331-64761372	-0.171624	0.06235	-0.14174	0.047696	0.029884	-0.014654
chr14:64777857-64777898	-0.173849	0.073394	-0.0724829	0.09888	0.101366	0.025486
chr14:64783077-64783118	-0.0791076	0.10392	-0.0791076	0.050002	0	-0.053918
chr14:64799795-64799836	-0.186853	0.081804	-0.186853	0.071979	0	-0.009825
chr14:64816104-64816145	0.130649	0.19493	0.162023	0.073126	0.031374	-0.121804
chr14:64835054-64835095	0.117318	0.089214	0.117318	0.093489	0	0.004275
chr14:64883233-64883274	-0.0667619	0.086381	0.0334535	0.10619	0.100215	0.019809
chr14:64935770-64935811	-0.13789	0.067626	-0.13789	0.040171	0	-0.027455
chr3:157080923-157080964	-0.197894	0.088545	-0.167362	0.10093	0.030532	0.012385
chr3:157080923-157080964	-0.197894	0.088545	-0.0538986	0.086519	0.143995	-0.002026
chr6:53654787-53654828	0.0621006	0.11365	0.239459	0.10603	0.177358	-0.00762
chr7:127375009-127375050	0.0424109	0.10392	0.0484619	0.12153	0.006051	0.01761
chr7:127375009-127375050	0.0424109	0.10392	0.0424109	0.12153	0	0.01761
chr7:128225743-128225784	-0.0780243	0.10392	-0.074386	0.043055	0.0036383	-0.060865
chr7:128254519-128254560	-0.243232	0.053568	-0.163904	0.061102	0.079328	0.007534
chr7:130782075-130782116	-0.08669	0.11267	-0.080661	0.060703	0.006029	-0.051967
chr7:130782075-130782116	-0.08669	0.11267	-0.117393	0.060703	-0.030703	-0.051967
chr19:8698572-8698613	-0.158063	0.045466	-0.158063	0.073126	0	0.02766
chr2:164672346-164672387	-0.0787113	0.28135	-0.15508	0.08447	-0.0763687	-0.19688
chr2:164672346-164672387	-0.0787113	0.28135	-0.107293	0.082035	-0.0285817	-0.199315
chr16:53775315-53775356	-0.228787	0.097792	-0.111994	0.1094	0.116793	0.011608
chr16:53775315-53775356	-0.228787	0.097792	-0.149313	0.1094	0.079474	0.011608
chr16:53775315-53775356	-0.228787	0.097792	-0.228787	0.1094	0	0.011608
chr12:132089466-132089507	0.0751556	0.19058	-0.0482748	0.1094	-0.12343	-0.08118
chr13:24303284-24303325	-0.109834	0.063643	-0.139121	0.073126	-0.029287	0.009483
chr13:32804627-32804668	-0.279013	0.070546	-0.12927	0.060703	0.149743	-0.009843
chr13:40579428-40579469	-0.273836	0.092504	-0.211046	0.069202	0.06279	-0.023302
chr13:41007510-41007551	-0.0741355	0.094435	-0.0493837	0.078123	0.0247518	-0.016312
chr13:49470825-49470866	-0.429221	0.057191	-0.287918	0.10157	0.141303	0.044379
chr13:50909028-50909069	-0.557573	0.086515	-0.498148	0.040506	0.059425	-0.046009
chr13:51946279-51946320	-0.142608	0.11918	-0.0918816	0.081338	0.0507264	-0.037842
chr13:72859967-72860008	0.000828391	0.11303	0.000828391	0.073645	0	-0.039385
chr13:72859967-72860008	0.000828391	0.11303	0.0224294	0.073645	0.021601	-0.039385
chr13:75505646-75505687	-0.0543438	0.08258	-0.116022	0.11838	-0.0616782	0.0358
chr13:112698582-112698623	-0.180425	0.96574	-0.180425	0.068177	0	-0.897563
chr13:112698582-112698623	-0.180425	0.96574	-0.186331	0.051238	-0.005906	-0.914502
chr13:113237025-113237066	-0.254016	0.064672	-0.249839	0.09888	0.004177	0.034208
chr13:113237025-113237066	-0.254016	0.064672	-0.242947	0.09888	0.011069	0.034208
chr13:113595472-113595513	-0.28044	0.085921	-0.11247	0.063879	0.16797	-0.022042
chr13:113841031-113841072	-0.0714668	0.089457	-0.0714668	0.066283	0	-0.023174
chr13:113841031-113841072	-0.0714668	0.089457	-0.136697	0.066283	-0.0652302	-0.023174
chr14:23022055-23022096	-0.188927	0.050108	-0.164287	0.088537	0.02464	0.038429
chr14:30726644-30726685	0.312958	0.14006	0.314624	0.081939	0.001666	-0.058121
chr14:34789925-34789966	-0.0913725	0.078323	-0.0913725	0.071436	0	-0.006887
chr14:34789925-34789966	-0.0913725	0.078323	-0.104813	0.071436	-0.0134405	-0.006887
chr14:37154450-37154491	-0.379482	0.061701	-0.379482	0.068188	0	0.006487
chr14:54973020-54973061	-0.02773	0.086005	-0.02773	0.073049	0	-0.012956
chr14:58299162-58299203	-0.100061	0.11092	-0.160111	0.073126	-0.06005	-0.037794
chr14:67995095-67995136	-0.0480817	0.10843	-0.022237	0.081939	0.0258447	-0.026491
chr14:68794425-68794466	0.0433937	0.047877	-0.0172231	0.094481	-0.0606168	0.046604
chr14:69666795-69666836	-0.179684	0.073792	-0.314072	0.075947	-0.134388	0.002155
chr14:72927394-72927435	0.0495858	0.19425	-0.0390011	0.068177	-0.0885869	-0.126073
chr14:102525791-102525832	-0.834429	0.04787	-0.899137	0.049334	-0.064708	0.001464
chr15:31319818-31319859	0.0193072	0.11438	0.0193072	0.07716	0	-0.03722
chr4:80263167-80263208	-0.135473	0.06778	-0.247373	0.064792	-0.1119	-0.002988
chr4:80263167-80263208	-0.135473	0.06778	-0.261752	0.068819	-0.126279	0.001039
chr2:237310836-237310877	-0.00777865	0.10392	-0.00777865	0.10603	0	0.00211
chr3:124731214-124731255	-0.313798	0.053845	-0.338546	0.071979	-0.024748	0.018134
chr3:124731214-124731255	-0.313798	0.053845	-0.313798	0.07716	0	0.023315
chr3:136206329-136206370	0.110058	0.19638	0.112658	0.081338	0.0026	-0.115042
chr3:136206329-136206370	0.110058	0.19638	0.106828	0.081338	-0.00323	-0.115042
chr3:138374027-138374068	0.0917251	0.11251	-0.0192039	0.087806	-0.110929	-0.024704
chr1:37995627-37995668	-0.203101	0.10431	-0.241742	0.07716	-0.038641	-0.02715
chr1:37995627-37995668	-0.203101	0.10431	-0.204465	0.07716	-0.001364	-0.02715
chr1:55023849-55023890	-0.192648	0.058278	-0.163897	0.036736	0.028751	-0.021542
chr1:55023849-55023890	-0.192648	0.058278	-0.206254	0.036736	-0.013606	-0.021542
chr1:109274948-109274989	-0.0919371	0.10457	0.0595357	0.10094	0.151473	-0.00363
chr1:109274948-109274989	-0.0919371	0.10457	-0.0919371	0.10094	0	-0.00363
chr1:113905747-113905788	-0.055185	0.11092	-0.055185	0.060744	0	-0.050176
chr1:113905747-113905788	-0.055185	0.11092	-0.116218	0.05493	-0.061033	-0.05599
chr1:151795552-151795593	0.23605	0.097792	0.156006	0.11856	-0.080044	0.020768
chr1:154449571-154449612	-0.205101	0.094435	-0.180837	0.052421	0.024264	-0.042014
chr4:81665876-81665917	-0.379842	0.054316	-0.379842	0.081794	0	0.027478
chr4:119979107-119979148	-0.188896	0.10392	-0.188896	0.075809	0	-0.028111
chr4:147486480-147486521	0.0673919	0.10101	0.048414	0.12707	-0.0189779	0.02606
chr4:155716901-155716942	-0.0851596	0.10431	-0.0767963	0.069989	0.0083633	-0.034321
chr1:222656188-222656229	-0.157547	0.097792	-0.054808	0.10335	0.102739	0.005558
chr1:230715662-230715703	0.0748248	0.10431	0.121076	0.044989	0.0462512	-0.059321
chr2:19742692-19742733	-0.165967	0.11251	-0.165967	0.057628	0	-0.054882
chr2:21310215-21310256	-0.0509473	0.067626	-0.0838261	0.074884	-0.0328788	0.007258
chr2:43854468-43854509	-0.230588	0.10642	-0.211276	0.066283	0.019312	-0.040137
chr2:45669278-45669319	0.0133888	0.10642	0.0893554	0.057683	0.0759666	-0.048737
chr2:162254006-162254047	-0.284048	0.075046	-0.244537	0.071436	0.039511	-0.00361
chr2:162254006-162254047	-0.284048	0.075046	-0.309008	0.071436	-0.02496	-0.00361
chr2:202943789-202943830	-0.513016	0.063235	-0.515518	0.057981	-0.002502	-0.005254
chr2:202943789-202943830	-0.513016	0.063235	-0.487015	0.071979	0.026001	0.008744
chr2:215435739-215435780	-0.135948	0.089587	-0.198052	0.059259	-0.062104	-0.030328
chr2:215435739-215435780	-0.135948	0.089587	-0.211802	0.059259	-0.075854	-0.030328
chr2:217815786-217815827	-0.312311	0.084136	-0.312311	0.057981	0	-0.026155
chr2:217815786-217815827	-0.312311	0.084136	-0.276673	0.059259	0.035638	-0.024877
chr3:157135134-157135175	0.0410633	0.14006	0.19079	0.064792	0.149727	-0.075268
chr3:172398092-172398133	-0.176915	0.087078	-0.168301	0.089981	0.008614	0.002903
chr4:56913381-56913422	-0.00456843	0.060129	0.00436106	0.065863	0.00892949	0.005734
chr11:65638109-65638150	-0.131552	0.043068	-0.115307	0.071979	0.016245	0.028911
chr11:65638109-65638150	-0.131552	0.043068	-0.133709	0.073126	-0.002157	0.030058
chr11:103799701-103799742	-0.112437	0.091567	0.0624631	0.078639	0.1749	-0.012928
chr11:110373616-110373657	-0.0703686	0.2221	-0.101816	0.12153	-0.0314474	-0.10057
chr11:110373616-110373657	-0.0703686	0.2221	-0.102997	0.1909	-0.0326284	-0.0312
chr12:111730185-111730226	0.0456357	0.10843	0.012874	0.1174	-0.0327617	0.00897
chr12:111730185-111730226	0.0456357	0.10843	-0.0674048	0.079956	-0.113041	-0.028474
chr13:110301870-110301911	-0.110619	0.084136	-0.0616615	0.16703	0.0489575	0.082894
chr15:90885386-90885427	-0.16151	0.068285	-0.143162	0.078639	0.018348	0.010354
chr15:90885386-90885427	-0.16151	0.068285	-0.113594	0.078639	0.047916	0.010354
chr16:75272484-75272525	-0.10645	0.09264	-0.10645	0.057981	0	-0.034659
chr17:61154984-61155025	-0.10949	0.12488	-0.10949	0.056669	0	-0.068211
chr7:19013090-19013131	-0.387596	0.11092	-0.425772	0.10335	-0.038176	-0.00757
chr17:80385125-80385166	-0.136487	0.08009	-0.136487	0.062119	0	-0.017971
chr18:22429708-22429749	-0.113587	0.11303	-0.113587	0.041188	0	-0.071842
chr19:11143191-11143232	-0.160678	0.073588	-0.186121	0.07716	-0.025443	0.003572
chr19:11143191-11143232	-0.160678	0.073588	-0.160678	0.07716	0	0.003572
chr19:44921901-44921942	-0.0788003	0.084233	-0.108999	0.078639	-0.0301987	-0.005594
chr19:44921901-44921942	-0.0788003	0.084233	-0.0851017	0.078639	-0.0063014	-0.005594
chr1:55039911-55039952	-0.117829	0.045537	-0.125831	0.073126	-0.008002	0.027589
chr6:32187784-32187825	-0.036732	0.08704	0.0311007	0.067801	0.0678327	-0.019239
chr6:32187784-32187825	-0.036732	0.08704	-0.0192737	0.067801	0.0174583	-0.019239
chr6:160596311-160596352	-0.0848633	0.082943	-0.139392	0.079685	-0.0545287	-0.003258
chr6:160596311-160596352	-0.0848633	0.082943	-0.147266	0.079685	-0.0624027	-0.003258
chr12:110958425-110958466	-0.0817465	0.078323	-0.0682178	0.057969	0.0135287	-0.020354
chr13:110397256-110397297	0.0715554	0.19317	0.0456567	0.059817	-0.0258987	-0.133353
chr13:110397256-110397297	0.0715554	0.19317	-0.0646394	0.078123	-0.136195	-0.115047
chr13:110397256-110397297	0.0715554	0.19317	0.0715554	0.058817	0	-0.134353
chr1:201903116-201903157	-0.035115	0.086381	-0.0420113	0.073126	-0.0068963	-0.013255
chr1:218654493-218654534	-0.137163	0.054864	-0.000784394	0.17246	0.136379	0.117596
chr1:55043892-55043933	-0.100086	0.11092	-0.0912582	0.1094	0.0088278	-0.00152
chr1:222649637-222649678	-0.408025	0.10991	-0.221239	0.051191	0.186786	-0.058719
chr2:21019839-21019880	-0.0225398	0.11092	0.124703	0.06445	0.147243	-0.04647
chr2:164071176-164071217	0.0567959	0.14006	0.0432597	0.067202	-0.0135362	-0.072858
chr12:89615162-89615203	-0.121456	0.10843	-0.0602886	0.065348	0.0611674	-0.043082
chr12:89615162-89615203	-0.121456	0.10843	-0.110399	0.047696	0.011057	-0.060734
chr12:89615162-89615203	-0.121456	0.10843	-0.0725017	0.047696	0.0489543	-0.060734
chr4:56899545-56899586	0.165491	0.19425	0.196162	0.066198	0.030671	-0.128052
chr6:12903705-12903746	-0.0117587	0.10101	0.126328	0.11242	0.138087	0.01141
chr6:12903705-12903746	-0.0117587	0.10101	-0.0117587	0.082035	0	-0.018975
chr6:73706125-73706166	-0.304427	0.064035	-0.429008	0.080149	-0.124581	0.016114
chr6:133888679-133888720	0.0291637	0.099106	0.024301	0.069442	-0.0048627	-0.029664
chr6:133888679-133888720	0.0291637	0.099106	-0.0603457	0.069442	-0.0895094	-0.029664
chr6:160580376-160580417	-0.163326	0.13246	-0.341187	0.078823	-0.177861	-0.053637
chr9:22092905-22092946	-0.347519	0.060168	-0.343705	0.082035	0.003814	0.021867
chr9:104823937-104823978	-0.022784	0.084233	0.142911	0.075947	0.165695	-0.008286
chr10:89243027-89243068	-0.0283197	0.067626	-0.0465261	0.057099	-0.0182064	-0.010527
chr10:103069692-103069733	-0.166579	0.0756	-0.149218	0.065635	0.017361	-0.009965
chr1:36482315-36482356	-0.139043	0.041774	-0.142405	0.071979	-0.003362	0.030205
chr1:38826016-38826057	-0.232441	0.2221	-0.187651	0.10835	0.04479	-0.11375
chr1:40890085-40890126	-0.228413	0.097792	-0.0923212	0.21648	0.136092	0.118688
chr1:41770105-41770146	-0.996199	0.044937	-0.740787	0.073126	0.255412	0.028189
chr1:42958360-42958401	-0.111055	0.081937	-0.0137727	0.073126	0.0972823	-0.008811
chr1:46110851-46110892	-0.60946	0.053155	-0.687291	0.07811	-0.077831	0.024955
chr1:56152219-56152260	-0.772313	0.065684	-0.772313	0.073126	0	0.007442
chr1:56440582-56440623	-0.427017	0.055566	-0.242794	0.073126	0.184223	0.01756
chr1:56440582-56440623	-0.427017	0.055566	-0.411425	0.073126	0.015592	0.01756
chr1:65440787-65440828	-0.241203	0.11082	-0.14991	0.12214	0.091293	0.01132
chr1:65604078-65604119	0.0715814	0.080063	-0.0615736	0.13283	-0.133155	0.052767
chr1:65604078-65604119	0.0715814	0.080063	-0.0992795	0.075069	-0.170861	-0.004994
chr1:65671486-65671527	-0.095142	0.067988	-0.095142	0.064792	0	-0.003196
chr1:78946263-78946304	-0.045324	0.11186	-0.045324	0.088675	0	-0.023185
chr1:92962410-92962451	-0.194915	0.071257	-0.280035	0.071007	-0.08512	-0.00025
chr1:108199481-108199522	-0.151376	0.096495	-0.207899	0.049397	-0.056523	-0.047098
chr1:111183571-111183612	0.023384	0.11267	-0.0384369	0.070779	-0.0618209	-0.041891
chr1:113761166-113761207	-0.126728	0.18487	-0.126728	0.1174	0	-0.06747
chr1:113761166-113761207	-0.126728	0.18487	-0.0966801	0.1174	0.0300479	-0.06747
chr1:117001689-117001730	-0.141401	0.081937	-0.156054	0.049397	-0.014653	-0.03254
chr1:150384433-150384474	0.338078	0.063235	0.295365	0.074884	-0.042713	0.011649
chr1:156117395-156117436	-1.16995	0.070698	-0.61373	0.073126	0.55622	0.002428
chr1:156117395-156117436	-1.16995	0.070698	-0.574868	0.073126	0.595082	0.002428
chr1:159204267-159204308	-0.0255423	0.091332	-0.0434271	0.09888	-0.0178848	0.007548
chr1:159204873-159204914	-0.0101834	0.20081	-0.0580954	0.079685	-0.047912	-0.121125
chr1:159204873-159204914	-0.0101834	0.20081	-0.238012	0.079685	-0.227829	-0.121125
chr1:159204873-159204914	-0.0101834	0.20081	-0.0101834	0.24888	0	0.04807
chr1:159205544-159205585	-0.230132	0.037323	-0.139122	0.069989	0.09101	0.032666
chr1:159205544-159205585	-0.230132	0.037323	-0.230132	0.069989	0	0.032666
chr1:159205684-159205725	-0.311057	0.072917	-0.347117	0.057981	-0.03606	-0.014936
chr1:159205684-159205725	-0.311057	0.072917	-0.311057	0.057981	0	-0.014936
chr1:161216493-161216534	-0.291837	0.038961	-0.291837	0.087912	0	0.048951
chr1:161216493-161216534	-0.291837	0.038961	-0.361191	0.087912	-0.069354	0.048951
chr5:132371383-132371424	-0.154042	0.13246	-0.13238	0.047926	0.021662	-0.084534
chr5:177409511-177409552	-0.0531416	0.089146	-0.092004	0.078606	-0.0388624	-0.01054
chr5:177409511-177409552	-0.0531416	0.089146	-0.0219999	0.074664	0.0311417	-0.014482
chr6:25801835-25801876	-0.0122077	0.11251	-0.0687189	0.079012	-0.0565112	-0.033498
chr6:25801835-25801876	-0.0122077	0.11251	-0.0235189	0.085835	-0.0113112	-0.026675
chr6:25835192-25835233	-0.391504	0.13734	-0.281206	0.050831	0.110298	-0.086509
chr6:25835192-25835233	-0.391504	0.13734	-0.391504	0.050831	0	-0.086509
chr6:25841784-25841825	-0.203152	0.046235	-0.198482	0.057981	0.00467	0.011746
chr6:25841784-25841825	-0.203152	0.046235	-0.217369	0.057981	-0.014217	0.011746
chr6:149807017-149807058	-0.00607281	0.11092	-0.067463	0.074664	-0.0613902	-0.036256
chr6:159979095-159979136	-0.212706	0.064035	-0.111497	0.042066	0.101209	-0.021969
chr6:160055215-160055256	-0.0304599	0.073588	-0.128666	0.071173	-0.0982061	-0.002415
chr6:160136102-160136143	-0.29134	0.089457	-0.28237	0.081939	0.00897	-0.007518
chr7:50558021-50558062	-0.124756	0.086005	-0.2648	0.049397	-0.140044	-0.036608
chr8:9318522-9318563	0.00120422	0.067988	-0.0806425	0.066469	-0.0818467	-0.001519
chr8:9326066-9326107	-0.152214	0.09104	-0.0811325	0.10603	0.0710815	0.01499
chr8:9326066-9326107	-0.152214	0.09104	-0.0739628	0.10603	0.0782512	0.01499
chr8:10428280-10428321	-0.238196	0.10843	-0.149115	0.066283	0.089081	-0.042147
chr9:7243969-7244010	0.0701534	0.081937	-0.0789596	0.13286	-0.149113	0.050923
chr10:16451119-16451160	-0.0914727	0.084496	-0.172009	0.051202	-0.0805363	-0.033294
chr10:16451119-16451160	-0.0914727	0.084496	-0.196945	0.058817	-0.105472	-0.025679
chr10:62094628-62094669	-0.0862199	0.10431	-0.0243036	0.078662	0.0619163	-0.025648
chr10:87658787-87658828	-0.276267	0.091567	-0.227184	0.057668	0.049083	-0.033899
chr10:95062506-95062547	-0.129517	0.10831	-0.0733978	0.062602	0.0561192	-0.045708
chr10:95144280-95144321	-0.234421	0.082974	-0.206956	0.079685	0.027465	-0.003289
chr10:133371257-133371298	-0.925035	0.045812	-0.989468	0.079685	-0.064433	0.033873
chr10:133371257-133371298	-0.925035	0.045812	-0.925035	0.079685	0	0.033873
chr11:2189408-2189449	-0.0839097	0.066247	-0.0583162	0.077964	0.0255935	0.011717
chr11:2189408-2189449	-0.0839097	0.066247	-0.0513031	0.077964	0.0326066	0.011717
chr11:27125557-27125598	0.0381431	0.11438	0.0381431	0.23167	0	0.11729
chr11:27125557-27125598	0.0381431	0.11438	-0.0371063	0.23167	-0.0752494	0.11729
chr2:70999233-70999274	0.989357	1.2797	0.840121	0.085835	-0.149236	-1.19386
chr2:72150235-72150276	-0.183885	0.084496	-0.11799	0.071979	0.065895	-0.012517
chr2:73585739-73585780	-0.426872	0.055993	-0.424289	0.073126	0.002583	0.017133
chr2:73619620-73619661	-0.149289	0.053606	-0.0993355	0.066283	0.0499535	0.012677
chr2:73619620-73619661	-0.149289	0.053606	-0.119725	0.066283	0.029564	0.012677
chr2:73628360-73628401	-0.109973	0.10457	-0.00645798	0.051238	0.103515	-0.053332
chr2:73628360-73628401	-0.109973	0.10457	-0.093924	0.064489	0.016049	-0.040081
chr2:73631060-73631101	-0.0726835	0.098917	-0.000775443	0.065863	0.0719081	-0.033054
chr3:36218014-36218055	0.17569	0.063235	0.223193	0.074884	0.047503	0.011649
chr2:73673697-73673738	-0.105133	0.091332	-0.0804405	0.073126	0.0246925	-0.018206
chr2:73696436-73696477	0.649465	1.2797	0.553059	0.06445	-0.096406	-1.21525
chr2:73708799-73708840	-0.0964055	0.13147	-0.103615	0.071979	-0.0072095	-0.059491
chr2:73708799-73708840	-0.0964055	0.13147	-0.108622	0.063802	-0.0122165	-0.067668
chr2:73729699-73729740	-0.380152	0.11251	-0.202941	0.063802	0.177211	-0.048708
chr2:135950392-135950433	-0.113342	0.093647	-0.113342	0.094481	0	0.000834
chr2:135950392-135950433	-0.113342	0.093647	-0.161331	0.094481	-0.047989	0.000834
chr2:210675763-210675804	-0.0745523	0.08465	-0.100011	0.068819	-0.0254587	-0.015831
chr2:210675763-210675804	-0.0745523	0.08465	-0.0745523	0.068819	0	-0.015831
chr3:183092336-183092377	-0.178813	0.06516	-0.152977	0.055093	0.025836	-0.010067
chr3:196215190-196215231	-0.0433826	0.11082	-0.0433826	0.063879	0	-0.046941
chr3:196215190-196215231	-0.0433826	0.11082	0.0119405	0.063879	0.0553231	-0.046941
chr4:9983801-9983842	-0.175319	0.08704	-0.0673808	0.079012	0.107938	-0.008028
chr4:88301655-88301696	0.0845018	0.12422	-0.0107268	0.060086	-0.0952286	-0.064134
chr4:88301655-88301696	0.0845018	0.12422	-0.00127179	0.060086	-0.0857736	-0.064134
chr4:186242907-186242948	-0.142751	0.074686	-0.117258	0.24459	0.025493	0.169904
chr5:1181592-1181633	-0.133851	0.10062	-0.117352	0.073126	0.016499	-0.027494
chr5:132369746-132369787	-0.127805	0.044903	-0.142067	0.066283	-0.014262	0.02138
chr5:132369746-132369787	-0.127805	0.044903	-0.127805	0.071979	0	0.027076
chr2:55923709-55923750	-0.165607	0.039557	-0.194286	0.073126	-0.028679	0.033569
chr8:9771223-9771264	-0.432212	0.086643	-0.428825	0.073126	0.003387	-0.013517
chr15:65063110-65063151	-0.173892	0.047068	-0.173861	0.064081	3.1e-05	0.017013
chr22:27491490-27491531	0.0192656	0.099967	0.0192656	0.094481	0	-0.005486
chr8:11173943-11173984	0.0633542	0.14006	0.0633542	0.11456	0	-0.0255
chr8:11173943-11173984	0.0633542	0.14006	0.00926172	0.11456	-0.0540925	-0.0255
chr14:52138105-52138146	-0.128419	0.091332	-0.143075	0.051191	-0.014656	-0.040141
chr11:2698425-2698466	-0.0887201	0.084496	-0.0887201	0.1062	0	0.021704
chr11:3864261-3864302	-0.451014	0.040415	-0.455143	0.047788	-0.004129	0.007373
chr11:5670278-5670319	-0.687015	0.10991	-0.765685	0.071979	-0.07867	-0.037931
chr11:5672297-5672338	0.18323	0.11918	0.146765	0.066283	-0.036465	-0.052897
chr11:5679824-5679865	-0.285389	0.089214	-0.285389	0.071979	0	-0.017235
chr11:5679824-5679865	-0.285389	0.089214	-0.221713	0.071979	0.063676	-0.017235
chr11:5680159-5680200	0.0261045	0.094435	-0.0494733	0.078606	-0.0755778	-0.015829
chr11:5680159-5680200	0.0261045	0.094435	-0.0621461	0.078606	-0.0882506	-0.015829
chr11:5844328-5844369	-0.311704	0.069902	-0.46821	0.1909	-0.156506	0.120998
chr11:8824536-8824577	-0.715452	0.074556	-0.715452	0.071436	0	-0.00312
chr11:10652172-10652213	-0.233716	0.06516	-0.281607	0.07355	-0.047891	0.00839
chr11:10652172-10652213	-0.233716	0.06516	-0.189022	0.07355	0.044694	0.00839
chr11:10731418-10731459	-0.167248	0.066581	-0.156511	0.060086	0.010737	-0.006495
chr11:17223519-17223560	-1.08844	0.045812	-1.08844	0.047944	0	0.002132
chr11:48058132-48058173	0.287697	1.0566	0.132798	0.047944	-0.154899	-1.00866
chr11:57617026-57617067	-0.4631	0.097792	-0.499563	0.040339	-0.036463	-0.057453
chr11:58152350-58152391	0.0635066	0.11555	0.0635066	0.047672	0	-0.067878
chr11:61803890-61803931	0.0178029	0.094435	0.0178029	0.11838	0	0.023945
chr11:61803890-61803931	0.0178029	0.094435	-0.0605388	0.11838	-0.0783417	0.023945
chr11:61803890-61803931	0.0178029	0.094435	-0.0594068	0.15747	-0.0772097	0.063035
chr11:61803890-61803931	0.0178029	0.094435	-0.0679266	0.11838	-0.0857295	0.023945
chr11:61850677-61850718	-0.163904	0.073275	-0.115134	0.10157	0.04877	0.028295
chr11:61850677-61850718	-0.163904	0.073275	-0.163904	0.073049	0	-0.000226
chr11:61850677-61850718	-0.163904	0.073275	-0.0427226	0.073049	0.121181	-0.000226
chr11:64210054-64210095	-0.202838	0.063374	-0.190512	0.11838	0.012326	0.055006
chr11:64210054-64210095	-0.202838	0.063374	-0.191416	0.11838	0.011422	0.055006
chr11:65626831-65626872	-0.10809	0.19493	-0.0873314	0.046548	0.0207586	-0.148382
chr11:65626831-65626872	-0.10809	0.19493	-0.031017	0.046548	0.077073	-0.148382
chr11:71920059-71920100	0.0186311	0.068285	-0.174457	0.071979	-0.193088	0.003694
chr11:72694385-72694426	-0.116612	0.12488	-0.116612	0.073126	0	-0.051754
chr11:72729059-72729100	-0.0961597	0.073206	-0.0849996	0.085835	0.0111601	0.012629
chr11:73236869-73236910	-0.0495101	0.068285	-0.0545068	0.04303	-0.0049967	-0.025255
chr11:73236869-73236910	-0.0495101	0.068285	-0.0186923	0.071979	0.0308178	0.003694
chr11:77827883-77827924	-0.342242	0.081256	-0.342242	0.08073	0	-0.000526
chr12:32513291-32513332	-0.0544873	0.09264	-0.0544873	0.089981	0	-0.002659
chr12:32696853-32696894	1.098	1.2797	1.098	0.1174	0	-1.1623
chr12:40156880-40156921	0.231417	0.08091	0.0530438	0.074884	-0.178373	-0.006026
chr12:40156880-40156921	0.231417	0.08091	0.231417	0.074884	0	-0.006026
chr12:40207986-40208027	-0.139679	0.073394	-0.0783528	0.057969	0.0613262	-0.015425
chr12:47814565-47814606	-0.34638	0.10991	-0.34638	0.10119	0	-0.00872
chr12:47814565-47814606	-0.34638	0.10991	-0.340269	0.10119	0.006111	-0.00872
chr12:47814565-47814606	-0.34638	0.10991	-0.19389	0.10119	0.15249	-0.00872
chr12:47820139-47820180	-0.0940407	0.040007	-0.120456	0.073126	-0.0264153	0.033119
chr12:49258928-49258969	-0.882308	0.063235	-0.68595	0.066283	0.196358	0.003048
chr12:49258928-49258969	-0.882308	0.063235	-0.671778	0.066283	0.21053	0.003048
chr12:51274132-51274173	-0.0824187	0.19425	-0.13143	0.1174	-0.0490113	-0.07685
chr12:51326243-51326284	-0.20583	0.089457	-0.279676	0.11456	-0.073846	0.025103
chr12:54318504-54318545	0.108923	0.135	-0.0613491	0.1174	-0.170272	-0.0176
chr12:54318504-54318545	0.108923	0.135	-0.0231808	0.1174	-0.132104	-0.0176
chr12:54336068-54336109	0.216434	0.077319	0.245	0.068181	0.028566	-0.009138
chr12:54336068-54336109	0.216434	0.077319	0.216434	0.068181	0	-0.009138
chr12:56625639-56625680	-0.666322	0.089214	-0.4329	0.077964	0.233422	-0.01125
chr12:56625639-56625680	-0.666322	0.089214	-0.268877	0.077964	0.397445	-0.01125
chr12:56703251-56703292	-0.269143	0.19638	-0.205902	0.081939	0.063241	-0.114441
chr12:64611279-64611320	-0.0420959	0.089146	-0.0686745	0.071979	-0.0265786	-0.017167
chr12:64611279-64611320	-0.0420959	0.089146	-0.0420959	0.078505	0	-0.010641
chr12:64622366-64622407	0.0775291	0.1337	0.0775291	0.060703	0	-0.072997
chr12:64634303-64634344	-0.683679	0.084796	-0.485136	0.051406	0.198543	-0.03339
chr12:64644215-64644256	-0.158137	0.067783	-0.102934	0.077129	0.055203	0.009346
chr12:108873413-108873454	-0.818009	0.07309	-0.801462	0.057981	0.016547	-0.015109
chr12:109582296-109582337	-0.217513	0.039471	-0.217513	0.053014	0	0.013543
chr12:114920353-114920394	-0.137454	0.14006	-0.126987	0.057981	0.010467	-0.082079
chr12:114920353-114920394	-0.137454	0.14006	-0.145111	0.08599	-0.007657	-0.05407
chr12:117040943-117040984	0.227261	0.14006	0.227261	0.063879	0	-0.076181
chr12:121748342-121748383	-0.155161	0.045537	-0.155161	0.071979	0	0.026442
chr12:121778984-121779025	-0.0835961	0.089214	0.079036	0.073126	0.162632	-0.016088
chr12:121778984-121779025	-0.0835961	0.089214	-0.097607	0.073126	-0.0140109	-0.016088
chr11:86055289-86055330	-0.599729	0.09104	-0.631033	0.059259	-0.031304	-0.031781
chr11:95099838-95099879	-0.0496389	0.091567	-0.0583484	0.15645	-0.0087095	0.064883
chr11:108443615-108443656	-0.0144376	0.11251	0.0202423	0.07355	0.0346799	-0.03896
chr11:114082880-114082921	-0.0782597	0.082388	-0.049232	0.13286	0.0290277	0.050472
chr11:114082880-114082921	-0.0782597	0.082388	-0.0885398	0.13286	-0.0102801	0.050472
chr11:114111579-114111620	-0.183265	0.10392	-0.165184	0.10093	0.018081	-0.00299
chr11:114217296-114217337	-0.122084	0.097792	-0.0517682	0.1094	0.0703158	0.011608
chr11:114217296-114217337	-0.122084	0.097792	-0.122084	0.1094	0	0.011608
chr11:116964627-116964668	0.981362	1.2797	0.777632	0.1174	-0.20373	-1.1623
chr11:117302084-117302125	0.431163	1.2797	0.344696	0.06445	-0.086467	-1.21525
chr11:117302084-117302125	0.431163	1.2797	0.392717	0.06445	-0.038446	-1.21525
chr11:122649830-122649871	0.412183	0.19638	0.103633	0.09888	-0.30855	-0.0975
chr11:122649830-122649871	0.412183	0.19638	0.174504	0.09888	-0.237679	-0.0975
chr11:125753271-125753312	-0.173918	1.2797	-0.0803209	0.081258	0.0935971	-1.19844
chr11:126415386-126415427	-0.153565	0.10991	-0.08993	0.061761	0.063635	-0.048149
chr11:126415386-126415427	-0.153565	0.10991	-0.160103	0.061761	-0.006538	-0.048149
chr11:129290413-129290454	-0.0903381	0.078044	-0.0903381	0.072614	0	-0.00543
chr12:630823-630864	-0.0440806	0.061744	-0.0764869	0.040506	-0.0324063	-0.021238
chr12:630823-630864	-0.0440806	0.061744	-0.0440806	0.040506	0	-0.021238
chr12:6019257-6019298	-0.0566116	0.092504	-0.0831494	0.071979	-0.0265378	-0.020525
chr12:6019257-6019298	-0.0566116	0.092504	-0.108628	0.071979	-0.0520164	-0.020525
chr12:6054952-6054993	-0.0922504	0.063643	-0.11012	0.07635	-0.0178696	0.012707
chr12:6179881-6179922	0.0390391	0.11092	-0.0341137	0.055145	-0.0731528	-0.055775
chr12:6182706-6182747	-0.00982053	0.13734	-0.0140942	0.050727	-0.00427367	-0.086613
chr12:6223652-6223693	0.0742859	0.086005	0.0742859	0.07716	0	-0.008845
chr12:6223652-6223693	0.0742859	0.086005	0.118005	0.07716	0.0437191	-0.008845
chr12:7999548-7999589	-0.0933879	0.097792	-0.0450266	0.077964	0.0483613	-0.019828
chr12:21529285-21529326	0.0132596	0.10419	-0.0331732	0.10603	-0.0464328	0.00184
chr12:27253794-27253835	-0.182101	0.091042	-0.214698	0.066283	-0.032597	-0.024759
chr12:27253794-27253835	-0.182101	0.091042	-0.164905	0.071979	0.017196	-0.019063
chr12:29278301-29278342	-0.309985	0.10419	-0.410092	0.059233	-0.100107	-0.044957
chr12:29284264-29284305	0.371986	0.14006	0.427879	0.054986	0.055893	-0.085074
chr12:29284264-29284305	0.371986	0.14006	0.371986	0.054986	0	-0.085074
chr1:29090108-29090149	-0.402038	0.043559	-0.29435	0.09888	0.107688	0.055321
chr1:35578678-35578719	-0.0480757	0.12586	-0.0801801	0.10335	-0.0321044	-0.02251
chr1:37466257-37466298	-0.128305	0.049789	-0.0734879	0.062119	0.0548171	0.01233
chr1:42961527-42961568	-0.0918466	0.076881	-0.0918643	0.09888	-1.77e-05	0.021999
chr1:42957931-42957972	-0.102177	0.068737	-0.102177	0.073126	0	0.004389
chr1:43612388-43612429	-0.0660967	0.15029	-0.107762	0.083283	-0.0416653	-0.067007
chr1:47213566-47213607	-0.193064	0.061953	-0.200082	0.12707	-0.007018	0.065117
chr1:50819769-50819810	0.505668	0.074556	0.493901	0.11998	-0.011767	0.045424
chr1:52868106-52868147	-0.561363	0.067288	-0.561363	0.071979	0	0.004691
chr1:62438692-62438733	-0.28648	0.23981	-0.278641	0.07716	0.007839	-0.16265
chr1:63435737-63435778	0.087888	0.11267	0.203383	0.072668	0.115495	-0.040002
chr1:77499150-77499191	0.178813	0.13331	0.226159	0.049391	0.047346	-0.083919
chr1:92839007-92839048	-0.820985	0.10991	-0.861236	0.10929	-0.040251	-0.00062
chr1:110368825-110368866	-0.0623731	0.096495	-0.0623731	0.069863	0	-0.026632
chr1:111138769-111138810	-0.661119	0.067196	-0.650533	0.08073	0.010586	0.013534
chr1:114390223-114390264	-0.193466	0.092504	-0.163249	0.071979	0.030217	-0.020525
chr1:114390223-114390264	-0.193466	0.092504	-0.212867	0.068819	-0.019401	-0.023685
chr1:150905604-150905645	0.243937	0.089214	0.243937	0.1062	0	0.016986
chr1:154115762-154115803	0.00799864	0.13147	0.029727	0.046614	0.0217284	-0.084856
chr1:154162949-154162990	-0.300022	0.037323	-0.261506	0.077964	0.038516	0.040641
chr1:158643504-158643545	-0.0541638	0.05825	-0.110131	0.10619	-0.0559672	0.04794
chr1:158626628-158626669	0.258622	0.19638	0.258622	0.15134	0	-0.04504
chr1:158575444-158575485	-0.371247	0.08009	-0.213665	0.11019	0.157582	0.0301
chr1:158604977-158605018	0.0410127	0.11267	0.0410127	0.08073	0	-0.03194
chr1:158621174-158621215	-0.240164	0.274	-0.209819	0.07811	0.030345	-0.19589
chrX:40985472-40985513	-0.172872	0.064671	-0.30813	0.085835	-0.135258	0.021164
chrX:54870244-54870285	-0.138441	0.089587	-0.0550335	0.049632	0.0834075	-0.039955
chrX:54940594-54940635	-0.329149	0.13147	-0.443051	0.07811	-0.113902	-0.05336
chrX:66028530-66028571	-0.434701	0.091567	-0.301682	0.067801	0.133019	-0.023766
chrX:75023600-75023641	-0.904659	0.10165	-0.904659	0.078606	0	-0.023044
chrX:75907315-75907356	-0.610647	0.06516	-0.715176	0.10094	-0.104529	0.03578
chrX:110557097-110557138	-0.0458487	0.10431	0.0187962	0.079012	0.0646449	-0.025298
chrX:124125660-124125701	0.0345707	0.089587	0.0345707	0.087265	0	-0.002322
chrX:154000504-154000545	-0.00931512	0.09104	-0.0130713	0.065348	-0.00375618	-0.025692
chr1:3080018-3080059	0.0308223	0.099967	0.0308223	0.055145	0	-0.044822
chr1:3080018-3080059	0.0308223	0.099967	0.0114628	0.10335	-0.0193595	0.003383
chr1:3182262-3182303	-0.112759	0.08258	-0.119314	0.073126	-0.006555	-0.009454
chr1:11111465-11111506	-0.954455	0.10101	-1.03835	0.061761	-0.083895	-0.039249
chr1:11796301-11796342	-0.0960702	0.047057	-0.068935	0.10603	0.0271352	0.058973
chr1:11796301-11796342	-0.0960702	0.047057	-0.0960702	0.078606	0	0.031549
chr1:11796301-11796342	-0.0960702	0.047057	-0.106284	0.078606	-0.0102138	0.031549
chr1:11843999-11844040	0.16151	0.12586	0.16151	0.087265	0	-0.038595
chr1:20589725-20589766	-0.173215	0.053207	-0.0870938	0.047573	0.0861212	-0.005634
chr1:21664722-21664763	-0.0707692	0.28113	0.0233254	0.056171	0.0940946	-0.224959
chr1:22384364-22384405	0.111738	0.13147	0.0987262	0.10119	-0.0130118	-0.03028
chr1:22384364-22384405	0.111738	0.13147	0.16757	0.10119	0.055832	-0.03028
chr1:23514104-23514145	-0.454696	0.098048	-0.454696	0.047944	0	-0.050104
chr1:25274236-25274277	-0.0350692	0.084203	-0.0350692	0.073126	0	-0.011077
chr1:25274236-25274277	-0.0350692	0.084203	-0.12384	0.073126	-0.0887708	-0.011077
chr1:25351094-25351135	-0.137247	0.19425	-0.000126929	0.074034	0.13712	-0.120216
chr1:25406037-25406078	-0.0665663	0.084203	-0.101185	0.064081	-0.0346187	-0.020122
chr1:25491671-25491712	0.26255	0.19058	0.26255	0.064792	0	-0.125788
chr1:26564325-26564366	-0.0139006	0.074204	-0.0765978	0.10603	-0.0626972	0.031826
chr1:28890779-28890820	-0.186018	0.13246	-0.107541	0.07355	0.078477	-0.05891
chr1:28905799-28905840	-1.15981	0.045812	-1.15981	0.049334	0	0.003522
chr9:137021468-137021509	-0.253944	0.19425	-0.253944	0.071979	0	-0.122271
chr1:181520862-181520903	-0.096975	0.12586	-0.0102005	0.059233	0.0867745	-0.066627
chr3:73668965-73669006	-0.0269952	0.13147	-0.00233511	0.071007	0.0246601	-0.060463
chr4:158952024-158952065	-0.359243	0.043068	-0.266664	0.065635	0.092579	0.022567
chr6:21263869-21263910	-0.0389339	0.084136	-0.068777	0.073126	-0.0298431	-0.01101
chr6:31599625-31599666	-0.0712857	0.082931	-0.0148879	0.07635	0.0563978	-0.006581
chr7:158914306-158914347	-0.145644	0.084203	-0.183658	0.071979	-0.038014	-0.012224
chr21:46138618-46138659	-0.0942355	0.045537	-0.145869	0.066283	-0.0516335	0.020746
chr11:5422643-5422684	-0.207953	0.2221	-0.123016	0.055066	0.084937	-0.167034
chr1:152156598-152156639	-0.182134	0.047929	-0.182134	0.081055	0	0.033126
chr11:100977264-100977305	0.183896	0.135	0.065305	0.081794	-0.118591	-0.053206
chr22:38393911-38393952	-0.278068	0.060129	-0.2479	0.082035	0.030168	0.021906
chr1:149009637-149009678	-0.20236	0.058278	-0.126034	0.051406	0.076326	-0.006872
chr2:52142579-52142620	0.0912925	0.274	-0.0826917	0.24459	-0.173984	-0.02941
chr6:29792079-29792120	-0.0335821	0.085921	-0.0399002	0.071979	-0.0063181	-0.013942
chr6:31739933-31739974	0.063175	0.10457	0.0695493	0.11456	0.0063743	0.00999
chr6:39927504-39927545	-0.379577	0.062398	-0.316674	0.06445	0.062903	0.002052
chr7:142874876-142874917	-0.338315	0.15417	-0.2755	0.063802	0.062815	-0.090368
chr9:24906784-24906825	0.00889297	0.089146	-0.0194474	0.066283	-0.0283404	-0.022863
chr14:56979535-56979576	-0.297063	0.065526	-0.255922	0.045237	0.041141	-0.020289
chr17:62207824-62207865	0.236888	0.12422	0.0993874	0.050204	-0.137501	-0.074016
chr1:3605977-3606018	-0.174974	0.094435	-0.174974	0.16459	0	0.070155
chr6:64593187-64593228	-0.0100169	0.084136	0.0297916	0.047573	0.0398085	-0.036563
chr8:33337917-33337958	-0.567237	0.19638	-0.508302	0.054941	0.058935	-0.141439
chr9:15347004-15347045	-0.146259	0.054421	-0.153349	0.11456	-0.00709	0.060139
chr9:104800503-104800544	-0.229049	0.10431	0.0525932	0.074884	0.281642	-0.029426
chr9:104800503-104800544	-0.229049	0.10431	-0.0849285	0.05862	0.14412	-0.04569
chr19:41009338-41009379	-0.00521401	0.096495	-0.0666832	0.11456	-0.0614692	0.018065
chr12:78014970-78015011	-0.167895	0.10843	-0.167895	0.057974	0	-0.050456
chr16:1247050-1247091	-0.0283896	0.10392	-0.0379912	0.065348	-0.0096016	-0.038572
chr2:103382319-103382360	-0.108394	0.11092	-0.013505	0.10335	0.094889	-0.00757
chr1:153421058-153421099	-0.22475	0.089457	-0.22475	0.078123	0	-0.011334
chr3:180909495-180909536	0.102815	0.077467	0.102815	0.078606	0	0.001139
chr1:231385108-231385149	-0.250568	0.058364	-0.310706	0.16703	-0.060138	0.108666
chr6:26463327-26463368	-0.0574556	0.085674	-0.0310272	0.057969	0.0264284	-0.027705
chr6:26463327-26463368	-0.0574556	0.085674	-0.0574556	0.057969	0	-0.027705
chr7:81729715-81729756	-0.224007	0.083955	-0.224007	0.053407	0	-0.030548
chr7:81729715-81729756	-0.224007	0.083955	-0.236255	0.053407	-0.012248	-0.030548
chr4:3436896-3436937	-0.0850719	0.072917	0.138126	0.073126	0.223198	0.000209
chr4:3445409-3445450	-0.0994904	0.091042	-0.0850376	0.065986	0.0144528	-0.025056
chr2:214317145-214317186	-0.0366671	0.089214	-0.05945	0.078606	-0.0227829	-0.010608
chr3:20627559-20627600	0.391414	0.20602	0.0903487	0.03935	-0.301065	-0.16667
chr3:20627559-20627600	0.391414	0.20602	0.482022	0.03935	0.090608	-0.16667
chr5:88558557-88558598	-0.173314	0.070904	-0.173314	0.07355	0	0.002646
chr5:88558557-88558598	-0.173314	0.070904	-0.0937364	0.07355	0.0795776	0.002646
chr5:88919757-88919798	0.0020394	0.274	0.0020394	0.23167	0	-0.04233
chr8:34495072-34495113	-0.159182	0.099967	-0.166555	0.069863	-0.007373	-0.030104
chr10:104987576-104987617	-0.112624	0.099217	-0.112624	0.079685	0	-0.019532
chr10:104987576-104987617	-0.112624	0.099217	-0.188827	0.079685	-0.076203	-0.019532
chr12:89366947-89366988	-0.0617921	0.064672	-0.0617921	0.099993	0	0.035321
chr1:73348456-73348497	-0.0179751	0.18487	-0.0179751	0.12432	0	-0.06055
chr5:104568505-104568546	-0.27212	0.097792	-0.275808	0.1909	-0.003688	0.093108
chr5:104568505-104568546	-0.27212	0.097792	-0.27212	0.1909	0	0.093108
chr7:114518879-114518920	-0.28215	0.059137	-0.24568	0.077129	0.03647	0.017992
chr6:44249617-44249658	0.0987311	0.075046	0.0561335	0.10094	-0.0425976	0.025894
chr6:46150296-46150337	-0.0854151	0.13246	-0.19638	0.13286	-0.110965	0.0004
chr6:49492419-49492460	-0.0175738	0.092504	-0.193579	0.1062	-0.176005	0.013696
chr6:49639378-49639419	-0.299633	0.10642	-0.307816	0.062437	-0.008183	-0.043983
chr6:49639378-49639419	-0.299633	0.10642	-0.280236	0.062437	0.019397	-0.043983
chr6:53263179-53263220	0.0947418	0.097792	-0.0245617	0.05862	-0.119304	-0.039172
chr6:58069921-58069962	-0.262843	0.089146	-0.262843	0.063879	0	-0.025267
chr6:90238354-90238395	-0.191547	0.074204	-0.163082	0.12479	0.028465	0.050586
chr6:107115942-107115983	-0.108546	0.063374	-0.141257	0.066283	-0.032711	0.002909
chr6:107115942-107115983	-0.108546	0.063374	-0.108546	0.066283	0	0.002909
chr6:108977866-108977907	-0.138288	0.091042	-0.167567	0.071915	-0.029279	-0.019127
chr6:109248970-109249011	-0.247882	0.071257	-0.19039	0.10119	0.057492	0.029933
chr6:109248970-109249011	-0.247882	0.071257	-0.102056	0.10119	0.145826	0.029933
chr6:111176156-111176197	-0.11441	0.064672	-0.11441	0.10093	0	0.036258
chr6:113065053-113065094	-0.423477	0.044002	-0.293953	0.061251	0.129524	0.017249
chr6:121493537-121493578	0.00951332	0.092504	0.132526	0.10335	0.123013	0.010846
chr6:121872710-121872751	-0.329698	0.078366	-0.394355	0.079685	-0.064657	0.001319
chr6:122572634-122572675	-0.65326	0.060168	-0.735879	0.12153	-0.082619	0.061362
chr6:127361875-127361916	0.299742	0.19638	0.247242	0.03264	-0.0525	-0.16374
chr6:131066864-131066905	-0.079388	0.10831	-0.0703073	0.065635	0.0090807	-0.042675
chr6:135001462-135001503	-0.60244	0.047534	-0.48434	0.068819	0.1181	0.021285
chr6:135069678-135069719	0.105014	0.13246	0.0916381	0.054028	-0.0133759	-0.078432
chr6:135074390-135074431	-0.209955	0.08144	-0.168608	0.054935	0.041347	-0.026505
chr6:135097758-135097799	-0.385141	0.037305	-0.60336	0.08447	-0.218219	0.047165
chr6:135097758-135097799	-0.385141	0.037305	-0.508787	0.051462	-0.123646	0.014157
chr6:135110482-135110523	-0.0838448	0.10642	-0.0167718	0.087912	0.067073	-0.018508
chr6:135110482-135110523	-0.0838448	0.10642	-0.0488247	0.094209	0.0350201	-0.012211
chr6:136823762-136823803	-0.639327	0.10991	-0.639327	0.081939	0	-0.027971
chr6:139373065-139373106	-0.164348	0.071005	-0.164348	0.066283	0	-0.004722
chr6:139507157-139507198	-0.76164	0.067196	-1.02333	0.07635	-0.26169	0.009154
chr15:90883310-90883351	-0.237923	0.082388	-0.26754	0.068188	-0.029617	-0.0142
chr15:90883310-90883351	-0.237923	0.082388	-0.179517	0.068188	0.058406	-0.0142
chr16:9833089-9833130	0.00541179	0.11082	0.00541179	0.24459	0	0.13377
chr16:9833089-9833130	0.00541179	0.11082	0.0177276	0.24459	0.0123158	0.13377
chr16:29928536-29928577	0.151426	0.34259	0.138836	0.074034	-0.01259	-0.268556
chr20:49474222-49474263	-0.0900422	0.098048	-0.0272001	0.07635	0.0628421	-0.021698
chr22:42175002-42175043	-0.463601	0.045812	-0.436311	0.073126	0.02729	0.027314
chr2:57760438-57760479	-0.225072	0.091925	-0.14901	0.14539	0.076062	0.053465
chr2:57760438-57760479	-0.225072	0.091925	-0.167221	0.14539	0.057851	0.053465
chr12:2390663-2390704	-0.132846	0.050118	-0.215393	0.11456	-0.082547	0.064442
chr1:29964401-29964442	-0.0903084	0.10165	-0.107807	0.055637	-0.0174986	-0.046013
chr1:43634393-43634434	0.127428	0.13734	0.288492	0.20852	0.161064	0.07118
chr1:72812912-72812953	0.407464	0.089457	0.466181	0.071315	0.058717	-0.018142
chr1:95121197-95121238	-0.0820817	0.11438	-0.066055	0.1094	0.0160267	-0.00498
chr1:98087256-98087297	0.012531	0.10062	0.205079	0.24888	0.192548	0.14826
chr1:150059474-150059515	-0.498372	0.10991	-0.109027	0.081939	0.389345	-0.027971
chr1:150059474-150059515	-0.498372	0.10991	-0.498372	0.081939	0	-0.027971
chr1:163758666-163758707	0.0510664	0.084233	0.0510664	0.046557	0	-0.037676
chr1:239046738-239046779	-0.0962395	0.078044	-0.0745983	0.057938	0.0216412	-0.020106
chr2:27810651-27810692	-0.0424398	0.12422	-0.0489031	0.12707	-0.0064633	0.00285
chr2:96750396-96750437	-0.0258538	0.097792	-0.069961	0.24459	-0.0441072	0.146798
chr2:96750396-96750437	-0.0258538	0.097792	-0.0277289	0.24459	-0.0018751	0.146798
chr2:22381248-22381289	-0.191436	0.089457	-0.191436	0.068509	0	-0.020948
chr2:57844438-57844479	-0.0282031	0.135	-0.104269	0.060083	-0.0760659	-0.074917
chr2:57844438-57844479	-0.0282031	0.135	-0.0978313	0.060083	-0.0696282	-0.074917
chr2:184597294-184597335	-0.0479302	0.086381	-0.0479302	0.078606	0	-0.007775
chr2:184597294-184597335	-0.0479302	0.086381	-0.0965102	0.063879	-0.04858	-0.022502
chr2:184947193-184947234	-0.57672	0.054118	-0.483952	0.064433	0.092768	0.010315
chr2:192983594-192983635	0.0602159	0.088545	0.12379	0.068037	0.0635741	-0.020508
chr2:193513904-193513945	-0.525196	0.045812	-0.37002	0.054941	0.155176	0.009129
chr2:197439833-197439874	-1.05223	0.056985	-1.12151	0.057981	-0.06928	0.000996
chr2:197439833-197439874	-1.05223	0.056985	-0.945474	0.081794	0.106756	0.024809
chr3:2479618-2479659	-0.114568	0.10419	-0.0801662	0.21058	0.0344018	0.10639
chr3:2479618-2479659	-0.114568	0.10419	-0.114568	0.21058	0	0.10639
chr3:36814519-36814560	0.228422	0.34259	0.240874	0.054941	0.012452	-0.287649
chr3:36814519-36814560	0.228422	0.34259	0.17088	0.054941	-0.057542	-0.287649
chr3:52781869-52781910	-0.279846	0.061744	-0.378555	0.053014	-0.098709	-0.00873
chr3:52781869-52781910	-0.279846	0.061744	-0.279846	0.064582	0	0.002838
chr5:134570899-134570940	0.0423229	0.10419	-0.0899754	0.1062	-0.132298	0.00201
chr5:138376412-138376453	-0.20537	0.097792	-0.20048	0.1174	0.00489	0.019608
chr5:138376412-138376453	-0.20537	0.097792	-0.209201	0.1174	-0.003831	0.019608
chr5:153160774-153160815	0.05709	0.12586	0.0821196	0.050075	0.0250296	-0.075785
chr5:153160774-153160815	0.05709	0.12586	0.0739826	0.050075	0.0168926	-0.075785
chr6:27837457-27837498	0.180149	0.11555	-0.164277	0.069989	-0.344426	-0.045561
chr6:29276422-29276463	0.256246	0.10843	0.294969	0.068819	0.038723	-0.039611
chr6:29276422-29276463	0.256246	0.10843	0.276969	0.068819	0.020723	-0.039611
chr6:98136837-98136878	-0.246992	0.073206	-0.246992	0.079012	0	0.005806
chr7:1990212-1990253	-0.179561	0.089457	-0.133605	0.07355	0.045956	-0.015907
chr7:86798290-86798331	-0.104936	0.045537	-0.121689	0.057981	-0.016753	0.012444
chr7:86798290-86798331	-0.104936	0.045537	-0.104936	0.057981	0	0.012444
chr7:140967145-140967186	-0.00364441	0.099967	0.0142724	0.1062	0.0179168	0.006233
chr8:34163600-34163641	-0.0415826	0.062472	0.022085	0.057914	0.0636676	-0.004558
chr8:142229434-142229475	-0.105766	0.08921	-0.0896136	0.059559	0.0161524	-0.029651
chr10:18439050-18439091	-0.061044	0.073588	0.0736163	0.12214	0.13466	0.048552
chr10:102868457-102868498	-0.199648	0.06001	-0.199648	0.1174	0	0.05739
chr11:66715774-66715815	0.194583	0.12586	0.243653	0.037717	0.04907	-0.088143
chr11:66715774-66715815	0.194583	0.12586	0.159541	0.037717	-0.035042	-0.088143
chr11:113522252-113522293	-0.0611908	0.08431	-0.0651387	0.0403	-0.0039479	-0.04401
chr11:113522252-113522293	-0.0611908	0.08431	0.0241481	0.0403	0.0853389	-0.04401
chr12:2299008-2299049	0.0453617	0.089146	0.0453617	0.056989	0	-0.032157
chr14:29718179-29718220	-0.0561737	0.12586	-0.0640054	0.081939	-0.0078317	-0.043921
chr14:99246588-99246629	-0.137572	0.040415	-0.0573363	0.17246	0.0802357	0.132045
chr14:103795366-103795407	-0.157478	0.083897	-0.157478	0.073126	0	-0.010771
chr15:78616203-78616244	-0.690721	0.094435	-0.704617	0.081939	-0.013896	-0.012496
chr15:78616203-78616244	-0.690721	0.094435	-0.680582	0.081939	0.010139	-0.012496
chr10:102869096-102869137	-0.109592	0.10431	0.0102892	0.07716	0.119881	-0.02715
chr10:102869096-102869137	-0.109592	0.10431	-0.0449982	0.07716	0.0645938	-0.02715
chr10:103192722-103192763	-0.199666	0.040415	-0.135801	0.073126	0.063865	0.032711
chr10:103192722-103192763	-0.199666	0.040415	-0.107409	0.073126	0.092257	0.032711
chr10:104809429-104809470	-0.206345	0.091567	-0.2872	0.060086	-0.080855	-0.031481
chr11:24352979-24353020	-0.226632	0.070546	-0.203919	0.089981	0.022713	0.019435
chr11:46527184-46527225	-0.0631702	0.077467	-0.0631702	0.037404	0	-0.040063
chr11:109685092-109685133	-0.0429454	0.12586	-0.117933	0.046557	-0.0749876	-0.079303
chr11:124744041-124744082	-0.119448	0.063643	-0.0867525	0.10603	0.0326955	0.042387
chr11:124744041-124744082	-0.119448	0.063643	-0.0891946	0.061761	0.0302534	-0.001882
chr11:130861522-130861563	-0.00477082	0.091567	-0.0291284	0.082035	-0.0243576	-0.009532
chr12:53211540-53211581	-0.177989	0.08258	-0.177989	0.047672	0	-0.034908
chr12:57228568-57228609	-0.634014	0.049408	-0.485452	0.16703	0.148562	0.117622
chr12:57228568-57228609	-0.634014	0.049408	-0.461695	0.15747	0.172319	0.108062
chr12:103202657-103202698	-0.189142	0.082388	-0.218728	0.071173	-0.029586	-0.011215
chr12:123180546-123180587	0.219513	0.06729	0.123177	0.09888	-0.096336	0.03159
chr12:123180546-123180587	0.219513	0.06729	0.337043	0.09888	0.11753	0.03159
chr14:71967265-71967306	0.253712	0.30629	-0.069531	0.058817	-0.323243	-0.247473
chr14:99252862-99252903	0.182769	1.0566	0.182769	0.081338	0	-0.975262
chr14:99252862-99252903	0.182769	1.0566	0.21774	0.081338	0.034971	-0.975262
chr15:78602397-78602438	-0.352861	0.064561	-0.352861	0.068181	0	0.00362
chr15:84606324-84606365	-0.0137614	0.25202	0.237481	0.21648	0.251242	-0.03554
chr2:184736673-184736714	-0.195479	0.079577	-0.195479	0.07716	0	-0.002417
chr2:199851376-199851417	0.115252	0.12528	0.0682003	0.11456	-0.0470517	-0.01072
chr3:2506082-2506123	0.0473045	0.096374	0.0473045	0.059259	0	-0.037115
chr3:2506082-2506123	0.0473045	0.096374	0.0516628	0.059259	0.0043583	-0.037115
chr3:52803757-52803798	-0.0315125	0.10431	-0.0830421	0.046557	-0.0515296	-0.057753
chr3:52803757-52803798	-0.0315125	0.10431	-0.138213	0.046557	-0.106701	-0.057753
chr3:63847354-63847395	-0.0556511	0.049301	-0.119233	0.054368	-0.0635819	0.005067
chr3:63847354-63847395	-0.0556511	0.049301	-0.16774	0.10093	-0.112089	0.051629
chr4:102267532-102267573	-0.0759544	0.066581	-0.116094	0.078662	-0.0401396	0.012081
chr4:102267532-102267573	-0.0759544	0.066581	-0.12707	0.078662	-0.0511156	0.012081
chr4:102267532-102267573	-0.0759544	0.066581	-0.162037	0.078662	-0.0860826	0.012081
chr4:169281691-169281732	-0.264093	0.08465	-0.268673	0.10335	-0.00458	0.0187
chr5:154301167-154301208	0.13192	0.084796	0.13192	0.18127	0	0.096474
chr6:26210898-26210939	-0.0484078	1.2797	0.119512	0.1174	0.16792	-1.1623
chr6:26210898-26210939	-0.0484078	1.2797	0.126094	0.1174	0.174502	-1.1623
chr6:83573994-83574035	-0.229816	0.082388	-0.19006	0.07811	0.039756	-0.004278
chr6:92438603-92438644	-0.237333	0.064063	-0.2144	0.06791	0.022933	0.003847
chr6:92438603-92438644	-0.237333	0.064063	-0.242751	0.06791	-0.005418	0.003847
chr7:21480574-21480615	-0.0423985	0.091042	-0.144295	0.070779	-0.101897	-0.020263
chr7:24678330-24678371	-0.22736	0.047929	-0.111206	0.11856	0.116154	0.070631
chr7:87615624-87615665	0.248569	0.19493	0.248569	0.074132	0	-0.120798
chr7:87615624-87615665	0.248569	0.19493	0.193162	0.050399	-0.055407	-0.144531
chr8:34141033-34141074	0.394139	0.21991	0.428427	0.066736	0.034288	-0.153174
chr8:38415044-38415085	-0.286495	0.084233	-0.24558	0.06798	0.040915	-0.016253
chr8:88576377-88576418	-0.798499	0.062527	-0.71489	0.08447	0.083609	0.021943
chr8:142231552-142231593	0.0204692	0.10392	0.00352634	0.05862	-0.0169429	-0.0453
chr8:142231552-142231593	0.0204692	0.10392	0.0204692	0.05862	0	-0.0453
chr10:18456156-18456197	-0.0928218	0.18487	-0.0928218	0.099993	0	-0.084877
chr11:46210385-46210426	-0.141694	0.09264	-0.127859	0.047696	0.013835	-0.044944
chr11:57665835-57665876	0.00579004	0.11082	-0.0341527	0.10603	-0.0399427	-0.00479
chr11:88962658-88962699	-0.00713293	0.08911	-0.208928	0.12432	-0.201795	0.03521
chr11:112956124-112956165	-0.108244	0.19425	0.0114344	0.082035	0.119678	-0.112215
chr11:113506746-113506787	-0.032423	0.085674	0.00556989	0.11456	0.0379929	0.028886
chr11:113506746-113506787	-0.032423	0.085674	-0.032423	0.11456	0	0.028886
chr11:118470914-118470955	0.0397255	0.10392	-0.0987479	0.087265	-0.138473	-0.016655
chr12:117234514-117234555	-0.136586	0.075046	-0.136586	0.073126	0	-0.00192
chr12:120902776-120902817	-0.175817	0.08567	-0.11926	0.10603	0.056557	0.02036
chr13:53051626-53051667	0.219549	0.083339	0.219549	0.054368	0	-0.028971
chr13:53051626-53051667	0.219549	0.083339	0.0347074	0.064433	-0.184842	-0.018906
chr13:66367640-66367681	-0.162538	0.07309	-0.0643773	0.10603	0.0981607	0.03294
chr13:66367640-66367681	-0.162538	0.07309	-0.129765	0.087912	0.032773	0.014822
chr13:67627935-67627976	-0.198687	0.074556	-0.198687	0.056669	0	-0.017887
chr14:64219469-64219510	-0.0345366	0.037323	-0.0645964	0.081258	-0.0300598	0.043935
chr15:47424946-47424987	-0.0969808	0.053568	-0.0969808	0.038864	0	-0.014704
chr15:77775271-77775312	-0.185252	0.10843	-0.204173	0.047696	-0.018921	-0.060734
chr16:6265859-6265900	-0.165396	0.21991	-0.158266	0.049968	0.00713	-0.169942
chr16:6265859-6265900	-0.165396	0.21991	-0.14864	0.053014	0.016756	-0.166896
chr16:7617310-7617351	-0.253037	0.11092	-0.20038	0.082035	0.052657	-0.028885
chr16:7617310-7617351	-0.253037	0.11092	-0.253037	0.082035	0	-0.028885
chr3:141428552-141428593	0.0858677	0.96574	0.0706495	0.10603	-0.0152182	-0.85971
chr3:141428552-141428593	0.0858677	0.96574	0.0858677	0.10603	0	-0.85971
chr3:141529653-141529694	-0.35715	0.098917	-0.341121	0.089981	0.016029	-0.008936
chr3:142031068-142031109	-0.0521141	0.067988	0.0116171	0.073126	0.0637312	0.005138
chr3:142469475-142469516	-0.100576	0.058094	-0.0979405	0.15747	0.0026355	0.099376
chr3:142551497-142551538	-0.0424221	0.096495	-0.1366	0.081258	-0.0941779	-0.015237
chr3:149132004-149132045	-0.0260435	0.067655	-0.0535625	0.057668	-0.027519	-0.009987
chr3:150348733-150348774	-0.309996	0.08091	-0.473804	0.047573	-0.163808	-0.033337
chr3:150348733-150348774	-0.309996	0.08091	-0.326037	0.047573	-0.016041	-0.033337
chr3:160130692-160130733	-0.820519	0.061953	-0.682787	0.071979	0.137732	0.010026
chr3:169812087-169812128	-0.0928083	0.089146	-0.0928083	0.071979	0	-0.017167
chr3:169812087-169812128	-0.0928083	0.089146	-0.0179374	0.071979	0.0748709	-0.017167
chr3:172576690-172576731	-0.0209942	0.070904	-0.101651	0.10603	-0.0806568	0.035126
chr3:172576690-172576731	-0.0209942	0.070904	-0.0209942	0.10603	0	0.035126
chr3:177160454-177160495	-0.997166	0.075951	-0.997166	0.068181	0	-0.00777
chr3:179033537-179033578	-0.724669	0.091042	-0.724669	0.082035	0	-0.009007
chr3:179148434-179148475	-0.126201	0.040415	-0.136588	0.073126	-0.010387	0.032711
chr3:184024520-184024561	0.198661	0.13331	0.0779538	0.11456	-0.120707	-0.01875
chr3:184372434-184372475	-0.103367	0.058495	-0.130607	0.053014	-0.02724	-0.005481
chr3:184372434-184372475	-0.103367	0.058495	-0.0756138	0.053014	0.0277532	-0.005481
chr3:185812514-185812555	-0.162055	0.079343	-0.162055	0.061824	0	-0.017519
chr3:188415631-188415672	-0.248484	0.070546	-0.241364	0.067019	0.00712	-0.003527
chr3:188415631-188415672	-0.248484	0.070546	-0.230782	0.047788	0.017702	-0.022758
chr3:196056172-196056213	0.00417008	0.28135	-0.255469	0.064489	-0.259639	-0.216861
chr3:196127896-196127937	-0.0899881	0.074925	-0.181392	0.04949	-0.0914039	-0.025435
chr3:196191073-196191114	-0.279976	1.2797	-0.0542317	0.073126	0.225744	-1.20657
chr3:196503900-196503941	-0.186073	0.068737	-0.245701	0.059259	-0.059628	-0.009478
chr3:196791732-196791773	-1.00017	0.089457	-0.836171	0.057668	0.163999	-0.031789
chr4:1746453-1746494	0.00349667	0.092504	-0.0323986	0.073126	-0.0358953	-0.019378
chr4:3445136-3445177	-0.120787	0.11082	-0.0664586	0.073126	0.0543284	-0.037694
chr4:6918085-6918126	-0.200453	0.069324	-0.209424	0.057981	-0.008971	-0.011343
chr4:15601426-15601467	0.00378428	0.14006	0.0510903	0.15747	0.047306	0.01741
chr4:15601426-15601467	0.00378428	0.14006	0.0668725	0.068181	0.0630882	-0.071879
chr4:38654131-38654172	-0.183523	0.094435	-0.183523	0.11838	0	0.023945
chr4:54485509-54485550	-0.0362604	0.082974	-0.00326228	0.063879	0.0329981	-0.019095
chr4:54542812-54542853	-0.167254	0.046274	-0.174672	0.10157	-0.007418	0.055296
chr4:54542812-54542853	-0.167254	0.046274	-0.248551	0.10157	-0.081297	0.055296
chr4:54542688-54542729	-0.0545096	0.081937	-0.109253	0.059259	-0.0547434	-0.022678
chr4:54542688-54542729	-0.0545096	0.081937	-0.0195389	0.10603	0.0349707	0.024093
chr4:56861125-56861166	-0.167092	0.07309	-0.181029	0.15134	-0.013937	0.07825
chr4:56861125-56861166	-0.167092	0.07309	-0.236423	0.087912	-0.069331	0.014822
chr4:56967900-56967941	-0.710009	0.05301	-0.710009	0.069442	0	0.016432
chr4:70941612-70941653	0.00267173	0.10457	-0.0525197	0.051238	-0.0551914	-0.053332
chr4:78776696-78776737	-0.0901063	0.10991	-0.0268475	0.073126	0.0632588	-0.036784
chr4:82975645-82975686	-0.103921	0.09104	-0.103921	0.061761	0	-0.029279
chr4:87048955-87048996	0.212209	0.15754	0.19965	0.1094	-0.012559	-0.04814
chr4:99954563-99954604	-0.11524	0.10392	-0.0344271	0.081939	0.0808129	-0.021981
chr4:99954563-99954604	-0.11524	0.10392	-0.11524	0.081939	0	-0.021981
chr4:100201639-100201680	-0.398395	0.11092	-0.263162	0.10093	0.135233	-0.00999
chr4:102310750-102310791	0.00521966	0.10419	-0.00488606	0.11998	-0.0101057	0.01579
chr4:102557088-102557129	-0.129916	0.081937	-0.183006	0.048384	-0.05309	-0.033553
chr4:104884931-104884972	-0.158934	0.062428	-0.0907999	0.087912	0.0681341	0.025484
chr4:104884931-104884972	-0.158934	0.062428	-0.158934	0.087912	0	0.025484
chr4:109717648-109717689	-0.0292726	0.19638	-0.0292726	0.066283	0	-0.130097
chr4:109717648-109717689	-0.0292726	0.19638	-0.030573	0.066283	-0.0013004	-0.130097
chr4:109947160-109947201	-0.155869	0.079343	-0.188362	0.07811	-0.032493	-0.001233
chr4:121877238-121877279	0.0832633	0.11092	0.0670241	0.06445	-0.0162392	-0.04647
chr4:128082200-128082241	-0.254064	0.073792	-0.192018	0.1094	0.062046	0.035608
chr4:144104953-144104994	0.0252719	0.091332	0.0930992	0.064489	0.0678273	-0.026843
chr4:144114678-144114719	-0.134552	0.079577	-0.134552	0.051023	0	-0.028554
chr4:145133945-145133986	-0.218681	0.081937	-0.342416	0.08447	-0.123735	0.002533
chr4:145185729-145185770	-0.0920875	0.094435	-0.0790048	0.11838	0.0130827	0.023945
chr4:153468614-153468655	-0.166194	0.068934	-0.192141	0.042405	-0.025947	-0.026529
chr4:153636444-153636485	-0.167607	0.10431	-0.137298	0.073126	0.030309	-0.031184
chr5:1104803-1104844	-0.156694	0.079343	-0.180536	0.081258	-0.023842	0.001915
chr5:1104803-1104844	-0.156694	0.079343	-0.183938	0.071979	-0.027244	-0.007364
chr5:1285839-1285880	-0.206383	0.097792	-0.419346	0.073126	-0.212963	-0.024666
chr5:1285839-1285880	-0.206383	0.097792	-0.242071	0.073126	-0.035688	-0.024666
chr5:1287059-1287100	-0.0771523	0.16164	-0.00519698	0.086519	0.0719553	-0.075121
chr5:1287059-1287100	-0.0771523	0.16164	-0.0771523	0.086519	0	-0.075121
chr5:1287059-1287100	-0.0771523	0.16164	-0.0784042	0.086519	-0.0012519	-0.075121
chr5:34528153-34528194	0.0825288	0.071627	-0.0494535	0.10094	-0.131982	0.029313
chr5:36178171-36178212	0.0523322	0.10457	0.0262842	0.11456	-0.026048	0.00999
chr5:55979958-55979999	-0.164877	0.08091	-0.164877	0.13283	0	0.05192
chr5:56508705-56508746	-0.134874	0.079343	-0.134874	0.078606	0	-0.000737
chr5:56508705-56508746	-0.134874	0.079343	-0.234299	0.078606	-0.099425	-0.000737
chr5:56564934-56564975	-0.144226	0.14529	-0.155621	0.17246	-0.011395	0.02717
chr5:56564934-56564975	-0.144226	0.14529	-0.144226	0.17246	0	0.02717
chr5:62412986-62413027	-0.0104699	0.12422	-0.0821653	0.073126	-0.0716954	-0.051094
chr5:68313560-68313601	0.0359509	0.13246	0.0787637	0.06791	0.0428128	-0.06455
chr5:68418399-68418440	0.0964824	0.10101	0.120111	0.10603	0.0236286	0.00502
chr5:68418399-68418440	0.0964824	0.10101	0.0924327	0.069989	-0.0040497	-0.031021
chr5:72940921-72940962	0.0851902	0.19425	-0.0194622	0.075947	-0.104652	-0.118303
chr5:73621594-73621635	-0.191857	0.099106	-0.160777	0.081939	0.03108	-0.017167
chr5:76567774-76567815	-0.169365	0.074556	-0.169365	0.071915	0	-0.002641
chr5:88753504-88753545	-0.00241379	0.11303	-0.0306572	0.10094	-0.0282434	-0.01209
chr5:103264803-103264844	-0.133631	0.08091	-0.133631	0.079059	0	-0.001851
chr5:108417821-108417862	-0.153989	0.12488	-0.134626	0.069706	0.019363	-0.055174
chr5:111726166-111726207	0.0293511	0.10165	0.0895188	0.061761	0.0601677	-0.039889
chr5:111726166-111726207	0.0293511	0.10165	0.0293511	0.051406	0	-0.050244
chr5:119269308-119269349	-0.162669	0.04489	-0.13429	0.10335	0.028379	0.05846
chr5:133091140-133091181	0.0619661	0.13246	0.0619661	0.079012	0	-0.053448
chr5:157016035-157016076	-0.458438	0.084233	-0.30802	0.071007	0.150418	-0.013226
chr5:157016035-157016076	-0.458438	0.084233	-0.458438	0.071007	0	-0.013226
chr5:157765174-157765215	-0.162515	0.083339	-0.162515	0.074784	0	-0.008555
chr3:27035199-27035240	0.113606	0.11092	0.114708	0.1062	0.001102	-0.00472
chr3:36294958-36294999	-0.485869	0.06516	-0.37071	0.06791	0.115159	0.00275
chr6:128276995-128277036	-0.168326	0.08911	-0.12333	0.079012	0.044996	-0.010098
chr9:1975952-1975993	-0.439296	0.037323	-0.386544	0.057981	0.052752	0.020658
chrX:4811989-4812030	-0.0652085	0.34259	-0.0310208	0.07716	0.0341877	-0.26543
chr1:11711419-11711460	-0.127166	0.0756	-0.139727	0.064081	-0.012561	-0.011519
chr13:19911025-19911066	-0.875765	0.080912	-0.875765	0.10603	0	0.025118
chr2:150552633-150552674	-0.209997	0.15029	-0.209997	0.060305	0	-0.089985
chr18:5231116-5231157	0.00246678	0.28135	0.118247	0.11838	0.11578	-0.16297
chr2:217056026-217056067	-0.239287	0.074686	-0.344549	0.061251	-0.105262	-0.013435
chr2:217056026-217056067	-0.239287	0.074686	-0.239287	0.061251	0	-0.013435
chr3:27359736-27359777	-0.102074	0.074204	0.00218363	0.042405	0.104258	-0.031799
chr5:44926396-44926437	-0.239874	0.05417	-0.292989	0.094209	-0.053115	0.040039
chr5:56715510-56715551	-0.147786	0.089214	-0.180552	0.063879	-0.032766	-0.025335
chr10:121586582-121586623	0.00264059	0.11555	-0.0959173	0.083283	-0.0985579	-0.032267
chr10:121586582-121586623	0.00264059	0.11555	0.00264059	0.083283	0	-0.032267
chr16:52565256-52565297	-0.0801517	0.078577	-0.0576278	0.066198	0.0225239	-0.012379
chr22:28365140-28365181	-0.0850934	0.11555	-0.064926	0.047696	0.0201674	-0.067854
chr22:28365140-28365181	-0.0850934	0.11555	-0.136975	0.047696	-0.0518816	-0.067854
chr12:50750629-50750670	-0.197872	0.067988	-0.227508	0.060439	-0.029636	-0.007549
chr12:50750629-50750670	-0.197872	0.067988	-0.260033	0.060439	-0.062161	-0.007549
chr12:53389370-53389411	-0.31799	0.084203	-0.370483	0.10335	-0.052493	0.019147
chr12:53738787-53738828	-0.218564	0.11303	-0.154429	0.057981	0.064135	-0.055049
chr12:54300756-54300797	-0.0882028	0.10642	0.0129965	0.078606	0.101199	-0.027814
chr12:68801952-68801993	0.0490571	0.076881	0.0490571	0.057938	0	-0.018943
chr12:88451238-88451279	-0.0434452	0.20602	-0.0721713	0.080149	-0.0287261	-0.125871
chr12:89880824-89880865	-0.108286	0.084203	-0.0266483	0.043324	0.0816377	-0.040879
chr12:111472395-111472436	-0.162179	0.052204	-0.120539	0.054028	0.04164	0.001824
chr12:111472395-111472436	-0.162179	0.052204	-0.162179	0.069863	0	0.017659
chr12:111855748-111855789	-0.352796	0.08465	-0.214943	0.10335	0.137853	0.0187
chr12:111599176-111599217	-0.147287	0.065526	-0.141032	0.073126	0.006255	0.0076
chr12:112182073-112182114	-0.609305	0.076881	-0.70604	0.1174	-0.096735	0.040519
chr12:115114612-115114653	-0.0333611	0.067655	-0.0887467	0.1174	-0.0553856	0.049745
chr12:115114612-115114653	-0.0333611	0.067655	-0.0798554	0.1174	-0.0464943	0.049745
chr12:115114612-115114653	-0.0333611	0.067655	-0.0333611	0.1174	0	0.049745
chr12:120237194-120237235	-0.28045	0.08465	-0.28045	0.066283	0	-0.018367
chr12:121830511-121830552	-0.620671	0.060564	-0.58443	0.079685	0.036241	0.019121
chr12:122050286-122050327	-0.163486	0.060604	-0.159599	0.064582	0.003887	0.003978
chr12:122678219-122678260	0.0333739	0.10843	0.0333739	0.073645	0	-0.034785
chr12:124035764-124035805	-0.183544	0.08921	-0.164986	0.068177	0.018558	-0.021033
chr12:124035764-124035805	-0.183544	0.08921	-0.128256	0.068177	0.055288	-0.021033
chr12:124379281-124379322	-0.0749854	0.10642	-0.0749854	0.064489	0	-0.041931
chr12:124818709-124818750	-0.0739231	0.11251	-0.0739231	0.087806	0	-0.024704
chr11:116792392-116792433	-0.154286	0.09104	-0.154286	0.061251	0	-0.029789
chr11:116792392-116792433	-0.154286	0.09104	-0.157213	0.061251	-0.002927	-0.029789
chr11:119260204-119260245	-0.934304	0.050108	-0.934304	0.066198	0	0.01609
chr11:128792664-128792705	-0.322854	0.061953	-0.342601	0.064866	-0.019747	0.002913
chr12:1667557-1667598	0.578301	1.2797	0.375074	0.11838	-0.203227	-1.16132
chr12:1667557-1667598	0.578301	1.2797	0.462715	0.11838	-0.115586	-1.16132
chr12:6393074-6393115	-0.460758	0.061953	-0.43761	0.074884	0.023148	0.012931
chr12:6601961-6602002	0.0537548	0.088545	0.109318	0.068037	0.0555632	-0.020508
chr12:6601961-6602002	0.0537548	0.088545	0.0537548	0.068037	0	-0.020508
chr12:7045756-7045797	-0.221467	0.081256	-0.247341	0.080149	-0.025874	-0.001107
chr12:8042961-8043002	0.153121	0.34259	0.129151	0.085835	-0.02397	-0.256755
chr12:8805878-8805919	-0.148775	0.062398	-0.122603	0.15134	0.026172	0.088942
chr12:12734857-12734898	-0.133358	0.0756	-0.188992	0.062602	-0.055634	-0.012998
chr12:14440948-14440989	-0.0881798	0.10457	-0.163486	0.07716	-0.0753062	-0.02741
chr12:26886910-26886951	0.117021	0.13331	-0.0280029	0.061761	-0.145024	-0.071549
chr12:31966162-31966203	-0.0604653	0.063084	-0.0604653	0.1062	0	0.043116
chr12:48105328-48105369	-0.158031	0.066173	-0.110507	0.1174	0.047524	0.051227
chr11:93548943-93548984	0.0965962	0.10431	0.0570116	0.09888	-0.0395846	-0.00543
chr8:127091704-127091745	0.00380236	0.063235	0.144188	0.082031	0.140386	0.018796
chr8:127075564-127075605	0.349786	0.15029	0.349786	0.15134	0	0.00105
chr8:127091672-127091713	0.11563	0.1337	0.14636	0.078505	0.03073	-0.055195
chr8:127527095-127527136	-0.0913922	0.11303	-0.0913922	0.049968	0	-0.063062
chr8:23676485-23676526	-0.189059	0.077301	-0.193297	0.1094	-0.004238	0.032099
chr8:127096151-127096192	0.353103	0.10642	0.30527	0.050204	-0.047833	-0.056216
chr21:46490590-46490631	-0.328433	0.074112	-0.264967	0.08447	0.063466	0.010358
chr22:21574288-21574329	-0.0584918	0.13147	-0.038291	0.059259	0.0202008	-0.072211
chr22:21574288-21574329	-0.0584918	0.13147	-0.0584918	0.05165	0	-0.07982
chr22:24248648-24248689	-0.112636	0.070705	-0.13681	0.079956	-0.024174	0.009251
chr22:29220256-29220297	-0.0478618	0.11092	0.00913811	0.071979	0.0569999	-0.038941
chr22:29220256-29220297	-0.0478618	0.11092	0.0981326	0.071979	0.145994	-0.038941
chr22:30491548-30491589	-0.156286	0.20081	-0.156286	0.073126	0	-0.127684
chr22:30495293-30495334	-0.0884652	0.084796	-0.0469299	0.12214	0.0415353	0.037344
chr22:32503851-32503892	-0.0714101	0.058116	-0.0611535	0.24888	0.0102566	0.190764
chr22:37057196-37057237	-0.0746241	0.28135	-0.0746241	0.1094	0	-0.17195
chr22:37066876-37066917	-0.219049	0.080831	-0.219049	0.073126	0	-0.007705
chr22:37066876-37066917	-0.219049	0.080831	-0.1579	0.073126	0.061149	-0.007705
chr22:37066876-37066917	-0.219049	0.080831	-0.172994	0.073126	0.046055	-0.007705
chr22:37110932-37110973	-0.0486382	0.10642	0.0104286	0.066283	0.0590668	-0.040137
chr22:37987210-37987251	-0.262337	0.053074	-0.228288	0.073126	0.034049	0.020052
chr22:38636751-38636792	-0.935098	0.073275	-0.935098	0.12214	0	0.048865
chr22:42152914-42152955	0.0352441	0.13147	0.0352441	0.073126	0	-0.058344
chr22:42718525-42718566	-0.467853	0.13734	-0.310775	0.081939	0.157078	-0.055401
chr22:42718525-42718566	-0.467853	0.13734	-0.269257	0.081939	0.198596	-0.055401
chr22:43945004-43945045	0.0656486	0.13147	0.0656486	0.081258	0	-0.050212
chr22:43945004-43945045	0.0656486	0.13147	-0.0197241	0.071979	-0.0853727	-0.059491
chr22:43945004-43945045	0.0656486	0.13147	0.0106618	0.071979	-0.0549868	-0.059491
chr22:50552584-50552625	0.0363632	0.084233	-0.182072	0.11456	-0.218435	0.030327
chr1:109690341-109690382	-0.259539	0.051022	-0.145258	0.049955	0.114281	-0.001067
chr1:109690341-109690382	-0.259539	0.051022	-0.259539	0.049955	0	-0.001067
chr1:110325176-110325217	0.0146623	0.10831	-0.161738	0.065863	-0.1764	-0.042447
chr1:111137094-111137135	-0.697226	0.11092	-0.59063	0.071979	0.106596	-0.038941
chr1:113876847-113876888	-0.0947453	0.084233	-0.101488	0.18127	-0.0067427	0.097037
chr1:114446569-114446610	-0.0857935	0.071851	-0.0857935	0.064489	0	-0.007362
chr1:114446569-114446610	-0.0857935	0.071851	-0.124523	0.1062	-0.0387295	0.034349
chr1:119714933-119714974	-0.0201261	0.10457	-0.046458	0.054986	-0.0263319	-0.049584
chr1:119714933-119714974	-0.0201261	0.10457	-0.0201261	0.061249	0	-0.043321
chr1:150986340-150986381	-0.0382247	0.073588	-0.0382247	0.083283	0	0.009695
chr1:150986340-150986381	-0.0382247	0.073588	-0.0783812	0.24459	-0.0401565	0.171002
chr1:154278763-154278804	-0.651933	0.11303	-0.651933	0.058605	0	-0.054425
chr1:154278763-154278804	-0.651933	0.11303	-0.852868	0.058605	-0.200935	-0.054425
chr1:154370990-154371031	-0.132226	0.089214	-0.0743793	0.1174	0.0578467	0.028186
chr1:156937303-156937344	-0.106089	0.089146	-0.106089	0.07716	0	-0.011986
chr1:158613028-158613069	-0.365643	0.089587	-0.278019	0.073126	0.087624	-0.016461
chr1:158668450-158668491	-0.0493285	0.16164	-0.0992096	0.099993	-0.0498811	-0.061647
chr1:162196836-162196877	-0.0579255	0.09104	-0.0653897	0.08447	-0.0074642	-0.00657
chr1:172432967-172433008	0.283838	0.15535	0.283838	0.085835	0	-0.069515
chr1:179955193-179955234	-0.115661	0.036919	-0.128038	0.073126	-0.012377	0.036207
chr1:179973576-179973617	-0.0868061	0.081256	-0.166638	0.10157	-0.0798319	0.020314
chr1:198573877-198573918	-0.111112	0.094435	0.00890807	0.11838	0.12002	0.023945
chr1:198573877-198573918	-0.111112	0.094435	-0.111112	0.11838	0	0.023945
chr1:198644805-198644846	-0.0230396	0.091161	-0.0230396	0.061251	0	-0.02991
chr1:199041572-199041613	0.105793	0.20602	0.112791	0.24673	0.006998	0.04071
chr1:199041572-199041613	0.105793	0.20602	0.164978	0.24673	0.059185	0.04071
chr1:202160057-202160098	-0.224354	0.0756	-0.160277	0.079059	0.064077	0.003459
chr1:202160057-202160098	-0.224354	0.0756	-0.181498	0.071979	0.042856	-0.003621
chr1:203306259-203306300	-0.0888573	0.10939	-0.0775049	0.094481	0.0113524	-0.014909
chrX:2748323-2748364	-0.205702	0.073593	-0.165237	0.12153	0.040465	0.047937
chrX:11265685-11265726	-0.114189	0.0756	-0.157314	0.082035	-0.043125	0.006435
chrX:55040021-55040062	-0.8282	0.28135	-0.75005	0.10335	0.07815	-0.178
chrX:66043960-66044001	-0.069478	0.073074	-0.0902739	0.073126	-0.0207959	5.2e-05
chrX:66043960-66044001	-0.069478	0.073074	-0.097622	0.073126	-0.028144	5.2e-05
chrX:74803744-74803785	0.216793	0.22363	0.216793	0.038885	0	-0.184745
chrX:80494636-80494677	0.411299	0.10642	0.389098	0.069202	-0.022201	-0.037218
chrX:110519405-110519446	-0.12125	0.16164	-0.12125	0.08817	0	-0.07347
chrX:124039621-124039662	-1.02826	0.053155	-1.02826	0.050258	0	-0.002897
chrX:154383991-154384032	0.00798491	0.089214	0.00798491	0.052992	0	-0.036222
chrX:154672732-154672773	-0.166764	0.19638	0.0187854	0.078606	0.185549	-0.117774
chr20:43702797-43702838	-0.20847	0.081937	-0.107836	0.04303	0.100634	-0.038907
chr1:2214706-2214747	-0.241061	0.11082	-0.241372	0.073126	-0.000311	-0.037694
chr1:3774944-3774985	-0.151646	0.0756	-0.151646	0.10335	0	0.02775
chr1:3774944-3774985	-0.151646	0.0756	-0.138346	0.073126	0.0133	-0.002474
chr1:6541256-6541297	0.0547285	0.070698	0.023958	0.062602	-0.0307705	-0.008096
chr1:11798880-11798921	-0.552421	0.03499	-0.468361	0.071979	0.08406	0.036989
chr1:20589188-20589229	-0.0639236	0.0756	-0.195426	0.047696	-0.131502	-0.027904
chr1:20589188-20589229	-0.0639236	0.0756	-0.187551	0.047696	-0.123627	-0.027904
chr1:20895940-20895981	-0.208134	0.089587	-0.133981	0.1174	0.074153	0.027813
chr1:22960239-22960280	0.129502	0.098917	0.0402963	0.1062	-0.0892057	0.007283
chr1:25419134-25419175	0.00266791	0.11092	-0.000750173	0.11856	-0.00341808	0.00764
chr1:26544689-26544730	-0.111746	0.097792	-0.111746	0.077964	0	-0.019828
chr1:35663523-35663564	-0.172994	0.082943	-0.18139	0.17246	-0.008396	0.089517
chr1:39962283-39962324	-0.0949441	0.085674	-0.202728	0.043324	-0.107784	-0.04235
chr1:42970678-42970719	-0.73434	0.063235	-0.447625	0.073126	0.286715	0.009891
chr1:51050054-51050095	-1.16175	0.033488	-1.16252	0.043221	-0.00077	0.009733
chr1:62437183-62437224	-0.0866323	0.036379	-0.0866323	0.071979	0	0.0356
chr1:63565359-63565400	-0.276714	0.076881	-0.276714	0.17246	0	0.095579
chr1:65528862-65528903	-0.0425542	0.074204	-0.0425542	0.053922	0	-0.020282
chr1:77979061-77979102	-0.420846	0.086825	-0.415506	0.071979	0.00534	-0.014846
chr1:77979061-77979102	-0.420846	0.086825	-0.420846	0.059259	0	-0.027566
chr1:91121984-91122025	-0.375143	0.05301	-0.230403	0.065863	0.14474	0.012853
chr1:92590364-92590405	-0.0894112	0.086267	-0.126678	0.10335	-0.0372668	0.017083
chr1:93348834-93348875	-0.170436	0.08091	-0.153293	0.1062	0.017143	0.02529
chr1:93348834-93348875	-0.170436	0.08091	-0.202739	0.1062	-0.032303	0.02529
chr1:108045942-108045983	0.0896627	0.12528	0.136725	0.066283	0.0470623	-0.058997
chr19:19345435-19345476	-0.11136	0.084233	-0.0969545	0.11456	0.0144055	0.030327
chr19:19345435-19345476	-0.11136	0.084233	-0.11136	0.11456	0	0.030327
chr1:204390616-204390657	-0.0991914	0.069902	-0.111713	0.11998	-0.0125216	0.050078
chr1:101559414-101559455	-0.209527	0.091161	-0.0903677	0.055145	0.119159	-0.036016
chr12:128699867-128699908	-0.242917	0.08115	-0.268914	0.11456	-0.025997	0.03341
chr13:85811957-85811998	0.0570509	0.084796	0.125632	0.053407	0.0685811	-0.031389
chr15:31179249-31179290	-0.0282547	0.13734	-0.0959708	0.062602	-0.0677161	-0.074738
chr13:112981822-112981863	-0.134326	0.053568	-0.117416	0.057981	0.01691	0.004413
chr14:58371930-58371971	0.0392208	0.14006	0.0165147	0.11456	-0.0227061	-0.0255
chr15:67157947-67157988	0.0585911	0.10843	-0.0996299	0.10093	-0.158221	-0.0075
chr15:67157947-67157988	0.0585911	0.10843	-0.0121999	0.11456	-0.070791	0.00613
chr15:73931355-73931396	-0.0713308	0.062527	-0.0339881	0.18127	0.0373427	0.118743
chr15:78849422-78849463	-0.0826789	0.071257	0.00198038	0.057981	0.0846593	-0.013276
chr15:81085356-81085397	-0.0697149	0.091161	0.0562086	0.24888	0.125923	0.157719
chr16:15823961-15824002	0.323358	0.15754	0.291679	0.10603	-0.031679	-0.05151
chr16:72067606-72067647	-0.0425109	0.11092	-0.0394198	0.073126	0.0030911	-0.037794
chr16:72067606-72067647	-0.0425109	0.11092	-0.097582	0.073126	-0.0550711	-0.037794
chr16:75408225-75408266	-0.0516445	0.075951	-0.0516445	0.048466	0	-0.027485
chr16:83012165-83012206	-0.0465914	0.096495	-0.297072	0.079012	-0.250481	-0.017483
chr16:83012165-83012206	-0.0465914	0.096495	-0.070479	0.079012	-0.0238876	-0.017483
chr17:2141959-2142000	0.313326	0.34259	0.0555965	0.077129	-0.25773	-0.265461
chr17:2141959-2142000	0.313326	0.34259	0.14701	0.077129	-0.166316	-0.265461
chr17:29611386-29611427	0.0643643	0.13147	-0.0259277	0.057981	-0.090292	-0.073489
chr17:29611386-29611427	0.0643643	0.13147	0.0221247	0.057981	-0.0422396	-0.073489
chr17:31706475-31706516	-0.145188	0.084796	-0.0900741	0.07716	0.0551139	-0.007636
chr17:31706475-31706516	-0.145188	0.084796	-0.145188	0.07716	0	-0.007636
chr17:42118200-42118241	-0.0845099	0.07309	-0.0343855	0.07716	0.0501244	0.00407
chr17:46904695-46904736	0.240925	0.092504	0.314181	0.064792	0.073256	-0.027712
chr17:49411441-49411482	0.0931203	0.19638	-0.326574	0.081939	-0.419694	-0.114441
chr17:61159632-61159673	-0.0157412	0.10165	-0.0291266	0.17246	-0.0133854	0.07081
chr17:64322620-64322661	-0.112569	0.28113	-0.106893	0.05862	0.005676	-0.22251
chr18:48990078-48990119	-0.114731	0.073206	-0.114731	0.23167	0	0.158464
chr18:60171148-60171189	-0.0420556	0.091567	-0.177946	0.068359	-0.13589	-0.023208
chr18:60171148-60171189	-0.0420556	0.091567	-0.0420556	0.068359	0	-0.023208
chr19:11081497-11081538	-0.199408	0.096495	-0.133549	0.078662	0.065859	-0.017833
chr19:11081497-11081538	-0.199408	0.096495	-0.0930066	0.078662	0.106401	-0.017833
chr19:17734113-17734154	-0.133498	0.10101	-0.0639664	0.11456	0.0695316	0.01355
chr19:44923515-44923556	-0.489278	0.097792	-0.519835	0.081939	-0.030557	-0.015853
chr19:44923515-44923556	-0.489278	0.097792	-0.479406	0.081939	0.009872	-0.015853
chr20:41244108-41244149	-0.0574274	0.070705	-0.136365	0.053713	-0.0789376	-0.016992
chr20:45980242-45980283	0.396398	0.28135	0.371911	0.071979	-0.024487	-0.209371
chr20:64077901-64077942	-0.176312	0.12586	-0.109426	0.048014	0.066886	-0.077846
chr22:30273874-30273915	-0.146143	0.089214	-0.134904	0.08447	0.011239	-0.004744
chr22:30273874-30273915	-0.146143	0.089214	-0.224719	0.08447	-0.078576	-0.004744
chr22:40547008-40547049	-0.843076	0.10991	-0.83672	0.073126	0.006356	-0.036784
chr3:128481596-128481637	0.0060601	0.19317	0.0212599	0.061761	0.0151998	-0.131409
chr3:128575248-128575289	-0.626379	0.10991	-0.518689	0.081939	0.10769	-0.027971
chr3:128599134-128599175	-0.0932545	0.274	-0.169389	0.1174	-0.0761345	-0.1566
chr3:128599134-128599175	-0.0932545	0.274	-0.0928283	0.1174	0.0004262	-0.1566
chr3:128670796-128670837	-0.0558321	0.09104	-0.00693302	0.10603	0.0488991	0.01499
chr3:128670796-128670837	-0.0558321	0.09104	-0.113079	0.10603	-0.0572469	0.01499
chr1:8850031-8850072	-0.327014	0.071851	-0.122658	0.059259	0.204356	-0.012592
chr1:8850031-8850072	-0.327014	0.071851	-0.327014	0.059259	0	-0.012592
chr1:22014466-22014507	-0.234506	0.10991	-0.156109	0.08447	0.078397	-0.02544
chr1:26661135-26661176	-0.0280042	0.08921	-0.0262071	0.073126	0.0017971	-0.016084
chr1:26661135-26661176	-0.0280042	0.08921	-0.289041	0.063802	-0.261037	-0.025408
chr1:26819320-26819361	-0.618577	0.042292	-0.748562	0.047944	-0.129985	0.005652
chr1:36478295-36478336	-0.0966574	1.2797	-0.160443	0.06445	-0.0637856	-1.21525
chr1:36478295-36478336	-0.0966574	1.2797	-0.121428	0.06445	-0.0247706	-1.21525
chr1:36480092-36480133	-0.211304	0.10843	-0.244354	0.069073	-0.03305	-0.039357
chr1:36480092-36480133	-0.211304	0.10843	-0.211304	0.068177	0	-0.040253
chr1:42956266-42956307	-0.637774	0.097792	-0.637774	0.081939	0	-0.015853
chr1:50750603-50750644	-1.18232	0.054118	-1.18232	0.12153	0	0.067412
chr1:56299719-56299760	-0.108945	0.15029	0.0728368	0.080149	0.181782	-0.070141
chr1:56508586-56508627	-0.157181	0.13369	-0.157181	0.057981	0	-0.075709
chr1:65440426-65440467	-0.49948	0.060913	-0.495812	0.057938	0.003668	-0.002975
chr1:65440426-65440467	-0.49948	0.060913	-0.49948	0.057938	0	-0.002975
chr1:65612702-65612743	-0.014455	0.14006	0.00246551	0.082035	0.0169205	-0.058025
chr1:67005140-67005181	-0.218833	0.11303	-0.195446	0.071173	0.023387	-0.041857
chr1:67005140-67005181	-0.218833	0.11303	-0.218833	0.081258	0	-0.031772
chr1:92300861-92300902	-0.205031	0.08009	-0.207426	0.074884	-0.002395	-0.005206
chr1:100741107-100741148	0.0905627	0.11303	0.0905627	0.061413	0	-0.051617
chr1:100759868-100759909	-0.2327	0.053579	-0.2327	0.082031	0	0.028452
chr1:101193767-101193808	-0.00203634	0.11438	0.0667935	0.059259	0.0688298	-0.055121
chr1:101193767-101193808	-0.00203634	0.11438	-0.00203634	0.081794	0	-0.032586
chr2:160483581-160483622	-0.0412496	0.12586	0.0581602	0.056078	0.0994098	-0.069782
chr2:160483581-160483622	-0.0412496	0.12586	-0.0412496	0.056078	0	-0.069782
chr2:162267521-162267562	0.0703214	0.11365	-0.00491959	0.054986	-0.075241	-0.058664
chr2:162267521-162267562	0.0703214	0.11365	0.206279	0.054986	0.135958	-0.058664
chr2:162267521-162267562	0.0703214	0.11365	0.00799373	0.054986	-0.0623277	-0.058664
chr2:162267521-162267562	0.0703214	0.11365	0.0703214	0.054986	0	-0.058664
chr2:181459296-181459337	0.310108	0.28135	0.210964	0.078662	-0.099144	-0.202688
chr2:191656533-191656574	-0.343634	0.062693	-0.172585	0.068819	0.171049	0.006126
chr2:210678311-210678352	-0.0160121	0.094435	-0.0160121	0.11838	0	0.023945
chr2:210678311-210678352	-0.0160121	0.094435	-0.0497148	0.11838	-0.0337027	0.023945
chr2:218135239-218135280	0.0817033	0.11555	0.0868769	0.065635	0.0051736	-0.049915
chr2:218135239-218135280	0.0817033	0.11555	-0.0278615	0.065635	-0.109565	-0.049915
chr2:218135487-218135528	-0.0271215	0.10062	0.0139191	0.09888	0.0410406	-0.00174
chr2:218135524-218135565	-0.0550199	0.085921	-0.0828629	0.1174	-0.027843	0.031479
chr2:218156215-218156256	-0.210813	0.079343	-0.159957	0.09888	0.050856	0.019537
chr2:218156215-218156256	-0.210813	0.079343	-0.116826	0.09888	0.093987	0.019537
chr2:218270207-218270248	-0.0989245	0.060564	-0.0989245	0.059259	0	-0.001305
chr2:219180293-219180334	-0.0613989	0.11092	-0.0613989	0.073126	0	-0.037794
chr2:231717355-231717396	-0.103957	0.13147	-0.0579614	0.073126	0.0459956	-0.058344
chr2:233204391-233204432	-0.171258	0.23981	0.0491704	0.073126	0.220428	-0.166684
chr2:236887729-236887770	-0.0189685	0.099967	-0.181624	0.10603	-0.162656	0.006063
chr3:42833687-42833728	0.0648096	0.062282	-0.0793589	0.07355	-0.144168	0.011268
chr3:47125323-47125364	-0.520487	0.082931	-0.520487	0.099993	0	0.017062
chr3:58052858-58052899	-0.0464841	0.078304	-0.0464841	0.073126	0	-0.005178
chr3:63837319-63837360	-0.486064	0.067336	-0.488825	0.079956	-0.002761	0.01262
chr3:69793474-69793515	-0.0499759	0.058278	-0.112807	0.1062	-0.0628311	0.047922
chr3:71479772-71479813	0.166325	0.23981	0.149035	0.10157	-0.01729	-0.13824
chr3:98687930-98687971	-0.160705	0.074556	-0.146269	0.051567	0.014436	-0.022989
chr3:98687930-98687971	-0.160705	0.074556	-0.15686	0.051567	0.003845	-0.022989
chr3:107576798-107576839	-0.167978	0.11555	-0.183374	0.061761	-0.015396	-0.053789
chr3:120069646-120069687	-0.851472	0.048573	-0.887467	0.049397	-0.035995	0.000824
chr16:20576226-20576267	0.0322166	0.086825	0.0322166	0.059259	0	-0.027566
chr16:28568575-28568616	0.149602	0.10939	0.129436	0.081338	-0.020166	-0.028052
chr16:28568575-28568616	0.149602	0.10939	0.149602	0.081338	0	-0.028052
chr17:66626406-66626447	0.286496	0.19425	0.301481	0.073126	0.014985	-0.121124
chr16:34995861-34995902	0.0760662	0.19425	0.0760662	0.063879	0	-0.130371
chr16:51121112-51121153	-0.220634	0.079343	-0.241046	0.1062	-0.020412	0.026857
chr16:68260877-68260918	-0.0716657	0.044882	-0.0781645	0.071979	-0.0064988	0.027097
chr16:68260877-68260918	-0.0716657	0.044882	-0.0661255	0.061761	0.0055402	0.016879
chr16:81846688-81846729	-0.140527	0.074686	-0.159193	0.12069	-0.018666	0.046004
chr16:81846688-81846729	-0.140527	0.074686	-0.212695	0.12069	-0.072168	0.046004
chr17:3045144-3045185	-0.336473	0.073074	-0.336473	0.051023	0	-0.022051
chr18:36142733-36142774	-0.379806	0.069902	-0.329697	0.071436	0.050109	0.001534
chr18:36142733-36142774	-0.379806	0.069902	-0.390354	0.071436	-0.010548	0.001534
chr18:74506768-74506809	0.020473	0.071257	0.028184	0.073126	0.007711	0.001869
chr18:74506768-74506809	0.020473	0.071257	0.0161522	0.11456	-0.0043208	0.043303
chr18:74507725-74507766	-0.04983	0.089214	-0.130777	0.063879	-0.080947	-0.025335
chr18:74507725-74507766	-0.04983	0.089214	-0.141615	0.063879	-0.091785	-0.025335
chr19:15873572-15873613	-0.149103	0.044267	-0.214938	0.064489	-0.065835	0.020222
chr19:15873572-15873613	-0.149103	0.044267	-0.139758	0.064489	0.009345	0.020222
chr19:48802144-48802185	-0.225399	0.078577	-0.249059	0.081939	-0.02366	0.003362
chr20:46616187-46616228	0.0902182	0.1337	-0.0174235	0.078606	-0.107642	-0.055094
chr1:62494410-62494451	-0.00235763	0.072917	0.0404564	0.069989	0.042814	-0.002928
chr11:2183467-2183508	-0.331582	0.11303	-0.331582	0.077964	0	-0.035066
chr11:61790334-61790375	-0.355418	0.064671	-0.28957	0.048384	0.065848	-0.016287
chr11:61790334-61790375	-0.355418	0.064671	-0.355418	0.048384	0	-0.016287
chr11:61790334-61790375	-0.355418	0.064671	-0.32493	0.066471	0.030488	0.0018
chr11:61790334-61790375	-0.355418	0.064671	-0.288992	0.09888	0.066426	0.034209
chr11:61811971-61812012	-0.0817825	0.19638	0.0605815	0.081939	0.142364	-0.114441
chr11:61811971-61812012	-0.0817825	0.19638	-0.0817825	0.081939	0	-0.114441
chr11:61811971-61812012	-0.0817825	0.19638	0.0524143	0.081939	0.134197	-0.114441
chr11:61811971-61812012	-0.0817825	0.19638	0.0647969	0.081939	0.146579	-0.114441
chr11:123062048-123062089	-0.212095	0.062527	-0.212095	0.065863	0	0.003336
chr11:123062048-123062089	-0.212095	0.062527	-0.166677	0.065863	0.045418	0.003336
chr12:21190879-21190920	-0.248374	0.08258	-0.04284	0.073126	0.205534	-0.009454
chr12:21190879-21190920	-0.248374	0.08258	-0.206699	0.073126	0.041675	-0.009454
chr14:63766979-63767020	-0.120157	0.061701	-0.0312281	0.15747	0.0889289	0.095769
chr14:63766979-63767020	-0.120157	0.061701	-0.171282	0.15747	-0.051125	0.095769
chr14:63766979-63767020	-0.120157	0.061701	-0.108861	0.15747	0.011296	0.095769
chr16:20463936-20463977	0.00734993	0.11121	-0.0608295	0.086519	-0.0681794	-0.024691
chr16:20463936-20463977	0.00734993	0.11121	0.0678033	0.086519	0.0604534	-0.024691
chr16:56956784-56956825	0.0579056	0.15029	-0.0258433	0.051406	-0.0837489	-0.098884
chr16:56956784-56956825	0.0579056	0.15029	-0.0392544	0.051406	-0.09716	-0.098884
chr19:55226793-55226834	-0.154823	0.044937	-0.155175	0.067019	-0.000352	0.022082
chr19:55226793-55226834	-0.154823	0.044937	-0.154823	0.067019	0	0.022082
chr6:160154314-160154355	-0.0204886	0.15029	-0.0204886	0.057683	0	-0.092607
chr6:160154314-160154355	-0.0204886	0.15029	0.0476847	0.057683	0.0681733	-0.092607
chr7:33041882-33041923	0.202391	0.30629	0.202391	0.1909	0	-0.11539
chr7:33041882-33041923	0.202391	0.30629	0.289566	0.1909	0.087175	-0.11539
chr7:56031639-56031680	-0.537615	0.067288	-0.549168	0.057981	-0.011553	-0.009307
chr7:56031639-56031680	-0.537615	0.067288	-0.558824	0.089981	-0.021209	0.022693
chr7:99735305-99735346	0.0417327	0.13147	0.151433	0.073126	0.1097	-0.058344
chr7:99735305-99735346	0.0417327	0.13147	0.0700767	0.073126	0.028344	-0.058344
chr7:99735305-99735346	0.0417327	0.13147	0.12889	0.10093	0.0871573	-0.03054
chr7:99735354-99735395	-0.190739	0.091042	-0.273766	0.083114	-0.083027	-0.007928
chr7:101171459-101171500	-0.166036	0.12586	-0.154333	0.11456	0.011703	-0.0113
chr7:101172515-101172556	-0.110203	0.11092	-0.110203	0.07716	0	-0.03376
chr7:101172515-101172556	-0.110203	0.11092	-0.124091	0.07716	-0.013888	-0.03376
chr7:101174600-101174641	-0.128175	0.13734	-0.128175	0.073126	0	-0.064214
chr7:101174600-101174641	-0.128175	0.13734	-0.129998	0.073126	-0.001823	-0.064214
chr8:18414847-18414888	0.0236071	0.11082	0.0236071	0.071979	0	-0.038841
chr8:18414847-18414888	0.0236071	0.11082	0.02814	0.064433	0.0045329	-0.046387
chr8:18414974-18415015	-0.140626	0.047929	-0.140626	0.061102	0	0.013173
chr8:18415005-18415046	-0.156914	0.063354	-0.156914	0.10335	0	0.039996
chr8:18415005-18415046	-0.156914	0.063354	-0.117275	0.10335	0.039639	0.039996
chr8:18415105-18415146	-0.1587	0.068285	-0.1587	0.21648	0	0.148195
chr8:18415105-18415146	-0.1587	0.068285	-0.149573	0.21648	0.009127	0.148195
chr8:49062161-49062202	-0.186337	0.042826	-0.166198	0.066469	0.020139	0.023643
chr8:144058318-144058359	0.141125	0.10431	0.0717855	0.071979	-0.0693395	-0.032331
chr8:144058318-144058359	0.141125	0.10431	0.0875321	0.071979	-0.0535929	-0.032331
chr2:54597658-54597699	-0.160541	0.10843	-0.214181	0.044138	-0.05364	-0.064292
chr2:105488379-105488420	-0.240177	0.047057	-0.280085	0.069202	-0.039908	0.022145
chr2:133568494-133568535	-0.173423	0.084203	-0.181221	0.070615	-0.007798	-0.013588
chr2:144696381-144696422	0.0623039	0.274	0.0256276	0.081008	-0.0366763	-0.192992
chr2:191858382-191858423	0.329955	0.28135	0.161793	0.16512	-0.168162	-0.11623
chr2:219549277-219549318	-0.143027	0.05794	-0.199837	0.16512	-0.05681	0.10718
chr3:14234239-14234280	-0.12557	0.14529	-0.135376	0.1062	-0.009806	-0.03909
chr3:24423569-24423610	-0.0038677	0.096495	-0.00877788	0.074664	-0.00491018	-0.021831
chr3:42061533-42061574	0.0676168	0.23981	-0.0232049	0.073842	-0.0908217	-0.165968
chr3:49128616-49128657	-0.102999	0.086515	-0.14482	0.24459	-0.041821	0.158075
chr3:153282283-153282324	-0.0741876	0.10392	-0.0462274	0.07716	0.0279602	-0.02676
chr5:125008138-125008179	-0.170913	0.083897	-0.379204	0.047573	-0.208291	-0.036324
chr3:192655952-192655993	-0.132056	0.09104	0.0657693	0.079685	0.197825	-0.011355
chr5:174352186-174352227	-0.0137155	0.10642	-0.00405396	0.075809	0.00966154	-0.030611
chr6:7527016-7527057	-0.0671978	0.11092	-0.0570928	0.07716	0.010105	-0.03376
chr6:7527016-7527057	-0.0671978	0.11092	-0.0731088	0.07716	-0.005911	-0.03376
chr4:80280874-80280915	-0.000890331	0.10101	-0.000148902	0.15747	0.000741429	0.05646
chr4:80280874-80280915	-0.000890331	0.10101	-0.0609531	0.15747	-0.0600628	0.05646
chr6:22569940-22569981	-0.0965105	0.064561	-0.0397805	0.063879	0.05673	-0.000682
chr5:1054062-1054103	-0.108149	0.08009	-0.169916	0.073126	-0.061767	-0.006964
chr5:32629293-32629334	0.109071	0.135	0.0461309	0.24459	-0.0629401	0.10959
chr5:45864721-45864762	0.0652701	0.067626	0.14964	0.094481	0.0843699	0.026855
chr5:93119929-93119970	0.03729	0.11092	0.00342037	0.081338	-0.0338696	-0.029582
chr5:111710625-111710666	-0.450015	0.091042	-0.491466	0.091992	-0.041451	0.00095
chr3:172082446-172082487	-0.118735	0.091161	-0.0635113	0.05832	0.0552237	-0.032841
chr3:172082446-172082487	-0.118735	0.091161	-0.118735	0.060305	0	-0.030856
chr5:171441598-171441639	-0.121701	0.13734	-0.118939	0.078123	0.002762	-0.059217
chr4:55256918-55256959	-0.0642688	0.083339	-0.00753496	0.1062	0.0567338	0.022861
chr4:61544063-61544104	-0.147746	0.097792	-0.158036	0.066283	-0.01029	-0.031509
chr6:18227295-18227336	-0.0622201	0.11092	-0.0622201	0.16703	0	0.05611
chr4:94585043-94585084	0.416325	0.25202	0.416325	0.057938	0	-0.194082
chr6:36678171-36678212	-0.0402925	0.073588	0.00652886	0.087265	0.0468214	0.013677
chr6:36678171-36678212	-0.0402925	0.073588	-0.106299	0.087265	-0.0660065	0.013677
chr8:124847555-124847596	0.290396	0.34259	0.295883	0.073126	0.005487	-0.269464
chr8:140996079-140996120	-0.64762	0.041498	-0.5305	0.053014	0.11712	0.011516
chr9:70867711-70867752	-0.0738685	0.064134	-0.0920184	0.064866	-0.0181499	0.000732
chr9:82520980-82521021	0.160266	0.089457	-0.0441948	0.064433	-0.204461	-0.025024
chr9:82520980-82521021	0.160266	0.089457	-0.0620871	0.10335	-0.222353	0.013893
chr9:131328138-131328179	-0.386413	0.034175	-0.341248	0.057981	0.045165	0.023806
chr10:49302341-49302382	-0.071125	0.079343	-0.071125	0.099993	0	0.02065
chr10:61434798-61434839	-0.184027	0.069902	-0.0178191	0.24673	0.166208	0.176828
chr6:41691131-41691172	-0.168415	0.045537	-0.21927	0.055093	-0.050855	0.009556
chr6:46484862-46484903	0.0211732	0.11365	0.0665408	0.065348	0.0453676	-0.048302
chr6:113657033-113657074	-0.245874	0.089214	-0.245874	0.077964	0	-0.01125
chr18:75423999-75424040	-0.0518236	0.099967	-0.0940549	0.10335	-0.0422313	0.003383
chr8:38442086-38442127	-0.152408	0.097792	-0.0368933	0.036755	0.115515	-0.061037
chr3:8678245-8678286	-0.00153822	0.074204	0.0613569	0.1094	0.0628951	0.035196
chr19:55856098-55856139	-0.384995	0.10991	-0.384995	0.082035	0	-0.027875
chr19:1095317-1095358	-0.07686	0.08258	-0.0856106	0.073126	-0.0087506	-0.009454
chr1:105395820-105395861	-0.0895654	0.086005	0.0106866	0.078123	0.100252	-0.007882
chr10:95558180-95558221	0.0484286	0.10392	-0.0148435	0.071979	-0.0632721	-0.031941
chr11:24997803-24997844	-0.0498031	0.074556	-0.0802399	0.054615	-0.0304368	-0.019941
chr11:45672414-45672455	-0.229511	0.12488	-0.166625	0.060086	0.062886	-0.064794
chr13:63231563-63231604	-0.1757	0.086381	-0.21454	0.068177	-0.03884	-0.018204
chr13:96859663-96859704	-0.248321	0.067528	-0.219911	0.12432	0.02841	0.056792
chr16:65377853-65377894	-0.165511	0.058364	-0.0680202	0.15134	0.0974908	0.092976
chr18:69268392-69268433	-0.0230888	0.078323	-0.0200267	0.082031	0.0030621	0.003708
chr22:43499302-43499343	-0.164026	0.12586	0.102337	0.075069	0.266363	-0.050791
chr3:120312073-120312114	0.0233792	0.08911	0.00250793	0.073126	-0.0208713	-0.015984
chr3:143236567-143236608	-0.131147	0.067526	-0.131147	0.075272	0	0.007746
chr5:178734156-178734197	-0.506475	0.097792	-0.559823	0.081939	-0.053348	-0.015853
chr6:23777584-23777625	-0.0941059	0.084796	-0.0941059	0.14744	0	0.062644
chr8:8924037-8924078	0.0450183	0.13147	0.0450183	0.049397	0	-0.082073
chr12:91843357-91843398	-0.239826	0.052847	-0.210751	0.04609	0.029075	-0.006757
chr16:53786571-53786612	-0.0598617	0.071005	0.0253391	0.074884	0.0852008	0.003879
chr1:65953384-65953425	-0.100029	0.10101	-0.0491978	0.13283	0.0508312	0.03182
chr1:71303762-71303803	0.0813064	0.10101	0.0813064	0.049391	0	-0.051619
chr1:73385984-73386025	-0.0170443	0.098917	-0.108697	0.11625	-0.0916527	0.017333
chr1:174321623-174321664	-0.168702	0.074925	-0.168702	0.045886	0	-0.029039
chr1:210043581-210043622	-0.0821675	0.049127	-0.214485	0.10335	-0.132318	0.054223
chr2:44071616-44071657	-0.491594	0.078304	-0.341873	0.061251	0.149721	-0.017053
chr2:44915514-44915555	-0.054646	0.082388	-0.134955	0.073126	-0.080309	-0.009262
chr2:44915514-44915555	-0.054646	0.082388	-0.0660006	0.073126	-0.0113546	-0.009262
chr2:57808336-57808377	0.0503211	0.11251	0.0503211	0.10157	0	-0.01094
chr2:63042449-63042490	-0.298327	0.08115	-0.236157	0.088537	0.06217	0.007387
chr2:63042449-63042490	-0.298327	0.08115	-0.211469	0.082035	0.086858	0.000885
chr2:143467626-143467667	-0.102392	0.083025	-0.102392	0.14744	0	0.064415
chr2:226314894-226314935	-0.166992	0.084136	-0.166992	0.10094	0	0.016804
chr3:85475000-85475041	-0.14278	0.10101	-0.114508	0.17246	0.028272	0.07145
chr3:155617035-155617076	-0.162945	0.058444	-0.18074	0.068819	-0.017795	0.010375
chr4:3248081-3248122	-0.313501	0.066247	-0.380889	0.04949	-0.067388	-0.016757
chr4:3248081-3248122	-0.313501	0.066247	-0.314231	0.04949	-0.00073	-0.016757
chr4:39420684-39420725	-0.491208	0.10165	-0.339517	0.054028	0.151691	-0.047622
chr4:46938339-46938380	-0.0957427	0.20602	-0.0043881	0.068037	0.0913546	-0.137983
chr4:99307839-99307880	-0.0882754	0.10392	-0.0920695	0.08599	-0.0037941	-0.01793
chr4:99332531-99332572	-0.211518	0.09264	-0.185767	0.085835	0.025751	-0.006805
[truncated: 233,773+ more rows]

## Sheet: GATA4 GWAS Scores
coordinate	gkm_ref_score_ref	minseq_ref_score_ref	gkm_alt_score_alt	minseq_alt_score_alt	delta_gkm	delta_minseq
chr18:3066627-3066668	0.0103936	0.069989	-0.0319776	0.069989	-0.0423712	0
chr8:11213528-11213569	0.0586076	0.099993	0.0259925	0.099993	-0.0326151	0
chr19:44908664-44908705	-0.0445319	0.07716	-0.0122097	0.07716	0.0323222	0
chr19:44908664-44908705	-0.0445319	0.07716	-0.0322585	0.07716	0.0122734	0
chr1:150598653-150598694	-0.724485	0.071979	-0.573647	0.071979	0.150838	0
chr12:95634077-95634118	-0.0646656	0.056171	-0.056844	0.056171	0.0078216	0
chr16:86575676-86575717	0.0222231	0.1174	0.0604693	0.1174	0.0382462	0
chr1:88820970-88821011	0.122111	0.080149	0.0967788	0.080149	-0.0253322	0
chr17:19313928-19313969	-0.0618522	0.057981	0.0326108	0.057981	0.094463	0
chr10:122473645-122473686	0.228274	0.10094	0.300008	0.12214	0.071734	0.0212
chr1:234496603-234496644	-0.611617	0.10603	-0.545096	0.10603	0.066521	0
chr6:31511189-31511230	-0.0081414	0.053407	-0.0081414	0.053407	0	0
chr6:31511189-31511230	-0.0081414	0.053407	-0.0614166	0.060086	-0.0532752	0.006679
chr1:155908295-155908336	-0.365108	0.073126	-0.35004	0.073126	0.015068	0
chr17:70298830-70298871	-0.213243	0.059259	-0.275737	0.059259	-0.062494	0
chr6:85002638-85002679	-0.220022	0.050258	-0.267438	0.047672	-0.047416	-0.002586
chr3:21790428-21790469	-0.505629	0.10094	-0.505629	0.10094	0	0
chr10:125990643-125990684	-0.0565064	0.059259	-0.0565064	0.059259	0	0
chr22:45419676-45419717	-0.0156113	0.10094	0.0211892	0.10094	0.0368005	0
chr2:55646230-55646271	0.151523	0.081338	0.10969	0.081338	-0.041833	0
chr9:111295175-111295216	-0.210878	0.068359	-0.210878	0.068359	0	0
chr10:18423301-18423342	0.036995	0.21058	0.059109	0.21058	0.022114	0
chr6:27771581-27771622	0.0442415	0.11456	0.0627155	0.11456	0.018474	0
chr9:111022257-111022298	0.0690365	0.087265	0.0690365	0.087265	0	0
chr6:142242085-142242126	-0.315507	0.071979	-0.27221	0.073126	0.043297	0.001147
chr18:52693130-52693171	-0.0086655	0.07355	-0.000505	0.07355	0.00816057	0
chr12:109799946-109799987	-0.812791	0.065631	-0.614357	0.065631	0.198434	0
chr3:171878799-171878840	-0.0721648	0.045829	-0.0721648	0.045829	0	0
chr18:44857329-44857370	-0.019621	0.091992	-0.000212	0.066198	0.0194085	-0.025794
chr5:72981877-72981918	0.0484211	0.079012	0.0178107	0.079012	-0.0306104	0
chr6:1366600-1366641	-0.0708892	0.061249	-0.125736	0.061249	-0.0548468	0
chr10:11762433-11762474	-0.006077	0.044167	-0.0735917	0.066283	-0.0675147	0.022116
chr2:187163570-187163611	0.0157159	0.071007	0.00224856	0.071007	-0.0134673	0
chr2:187163570-187163611	0.0157159	0.071007	-0.0423427	0.071007	-0.0580586	0
chr17:45066830-45066871	0.16496	0.08817	0.0624093	0.058016	-0.102551	-0.030154
chr2:55900936-55900977	0.00662741	0.1094	0.0983595	0.1094	0.0917321	0
chr2:55900936-55900977	0.00662741	0.1094	0.0489631	0.1094	0.0423357	0
chr2:42905064-42905105	-0.0234589	0.061379	-0.0402155	0.066283	-0.0167566	0.004904
chr16:87193771-87193812	-0.130919	0.071979	-0.130919	0.071979	0	0
chr16:87193771-87193812	-0.130919	0.071979	-0.0905952	0.071979	0.0403238	0
chr16:51408748-51408789	-0.134112	0.058618	-0.117959	0.071979	0.016153	0.013361
chr16:51408748-51408789	-0.134112	0.058618	-0.134112	0.058618	0	0
chr14:91418291-91418332	-0.0624454	0.073126	-0.0369045	0.073126	0.0255409	0
chr14:91418291-91418332	-0.0624454	0.073126	-0.0624454	0.073126	0	0
chr5:61387276-61387317	-0.121325	0.066198	0.0621374	0.066469	0.183462	0.000271
chr17:75894262-75894303	-0.119047	0.073126	-0.109212	0.057981	0.009835	-0.015145
chr17:75894262-75894303	-0.119047	0.073126	-0.103931	0.057981	0.015116	-0.015145
chr2:55907944-55907985	-0.0656509	0.07716	-0.121529	0.070779	-0.0558781	-0.006381
chr2:55907944-55907985	-0.0656509	0.07716	-0.0587863	0.070779	0.0068646	-0.006381
chr17:45058915-45058956	0.13058	0.075272	0.0743397	0.081338	-0.0562403	0.006066
chr16:87199559-87199600	-0.449685	0.073126	-0.449685	0.073126	0	0
chr6:150697753-150697794	-0.281725	0.078123	-0.281725	0.078123	0	0
chr3:183645455-183645496	-0.173089	0.074132	-0.173089	0.074132	0	0
chr10:103699338-103699379	0.0598481	0.1062	0.0598481	0.1062	0	0
chr10:103699338-103699379	0.0598481	0.1062	0.0133374	0.1062	-0.0465107	0
chr2:42893589-42893630	-0.0222944	0.048667	0.0273864	0.044167	0.0496808	-0.0045
chr2:203144314-203144355	-0.106075	0.053014	-0.106075	0.053014	0	0
chr10:103850548-103850589	-0.183959	0.065635	-0.142953	0.04349	0.041006	-0.022145
chr5:83563226-83563267	-0.269233	0.08447	-0.12702	0.08447	0.142213	0
chr5:122182663-122182704	-0.026487	0.10335	0.0356418	0.10335	0.0621288	0
chr2:187300419-187300460	-0.044235	0.087912	-0.12184	0.064081	-0.077605	-0.023831
chr2:187300419-187300460	-0.044235	0.087912	-0.0557707	0.053922	-0.0115357	-0.03399
chr14:91415023-91415064	-0.246843	0.057981	-0.246843	0.057981	0	0
chr14:91415023-91415064	-0.246843	0.057981	-0.217649	0.057981	0.029194	0
chr8:8322103-8322144	-0.241581	0.049968	-0.155295	0.047696	0.086286	-0.002272
chr13:110390942-110390983	0.214446	0.12432	0.125858	0.12432	-0.088588	0
chr13:110390942-110390983	0.214446	0.12432	0.116144	0.12432	-0.098302	0
chr14:100159545-100159586	-0.0755717	0.061761	-0.05394	0.061761	0.0216317	0
chr1:214963859-214963900	-0.0360902	0.068773	-0.101843	0.068773	-0.0657528	0
chr17:64990423-64990464	-0.561521	0.067019	-0.573308	0.047573	-0.011787	-0.019446
chr6:125622070-125622111	-0.689763	0.067801	-0.845837	0.067801	-0.156074	0
chr1:214968207-214968248	0.219758	0.12214	0.183477	0.12214	-0.036281	0
chr22:24206488-24206529	-0.434563	0.066283	-0.284921	0.066283	0.149642	0
chr12:95106839-95106880	0.170656	0.10335	0.453557	0.10335	0.282901	0
chr5:56799739-56799780	-0.217262	0.053218	-0.217262	0.053218	0	0
chr5:76665123-76665164	-0.290944	0.091992	-0.161877	0.091992	0.129067	0
chr5:76668662-76668703	-0.169585	0.038356	-0.153694	0.051406	0.015891	0.01305
chr5:76668662-76668703	-0.169585	0.038356	-0.122203	0.038356	0.047382	0
chr5:76701064-76701105	0.094934	0.085835	0.0818882	0.085835	-0.0130458	0
chr5:76701064-76701105	0.094934	0.085835	0.22713	0.085835	0.132196	0
chr5:77662999-77663040	-0.513892	0.07355	-0.599296	0.069989	-0.085404	-0.003561
chr5:77763156-77763197	0.0248663	0.087806	0.00796036	0.087806	-0.0169059	0
chr5:77795083-77795124	-0.175356	0.073126	-0.177971	0.073126	-0.002615	0
chr5:88884359-88884400	-0.0800033	0.078606	-0.07038	0.078606	0.0096233	0
chr5:88884359-88884400	-0.0800033	0.078606	-0.0800033	0.078606	0	0
chr5:89456127-89456168	-0.0039528	0.064792	0.025163	0.10603	0.0291158	0.041238
chr5:111726130-111726171	-0.335822	0.054941	-0.227034	0.054941	0.108788	0
chr5:111726130-111726171	-0.335822	0.054941	-0.461781	0.054941	-0.125959	0
chr5:122865319-122865360	-0.700401	0.072668	-0.700401	0.072668	0	0
chr5:132371717-132371758	-0.0831246	0.10603	-0.0831246	0.10603	0	0
chr5:134159370-134159411	-0.355041	0.059259	-0.510596	0.059259	-0.155555	0
chr5:134501310-134501351	-0.0389871	0.059259	-0.106758	0.059259	-0.0677709	0
chr5:134501310-134501351	-0.0389871	0.059259	-0.0389871	0.059259	0	0
chr5:135356534-135356575	-0.084618	0.046557	-0.084618	0.046557	0	0
chr5:136148235-136148276	-0.161129	0.081794	-0.331468	0.081794	-0.170339	0
chr5:141322473-141322514	-0.0352148	0.18127	-0.0352148	0.18127	0	0
chr5:141500094-141500135	0.0512397	0.11998	0.0895683	0.11998	0.0383286	0
chr5:141500094-141500135	0.0512397	0.11998	0.063406	0.11998	0.0121663	0
chr5:141554495-141554536	-0.325523	0.08447	-0.325523	0.08447	0	0
chr5:142012872-142012913	-0.17233	0.073126	-0.14943	0.073126	0.0229	0
chr5:158819622-158819663	-0.0627835	0.10603	-0.0627835	0.10603	0	0
chr5:159208074-159208115	-0.0711021	0.065653	-0.0711021	0.065653	0	0
chr5:159208074-159208115	-0.0711021	0.065653	-0.129506	0.065653	-0.0584039	0
chr5:160168867-160168908	0.694429	0.10335	0.584246	0.10335	-0.110183	0
chr5:160206654-160206695	-0.232117	0.07716	-0.232117	0.07716	0	0
chr5:178179398-178179439	0.240245	0.23167	0.255165	0.23167	0.01492	0
chr5:178179398-178179439	0.240245	0.23167	0.333709	0.23167	0.093464	0
chr6:3280951-3280992	0.019347	0.081008	0.00607002	0.081008	-0.013277	0
chr6:3442734-3442775	0.169648	0.094481	0.14411	0.094481	-0.025538	0
chr6:3446009-3446050	-0.210211	0.08447	-0.210211	0.08447	0	0
chr6:11543089-11543130	-0.31042	0.072668	-0.0487555	0.072668	0.261665	0
chr6:11543089-11543130	-0.31042	0.072668	-0.243814	0.072668	0.066606	0
chr6:22904788-22904829	-0.132386	0.07716	-0.132991	0.07716	-0.000605	0
chr6:25296358-25296399	-0.0722619	0.07811	-0.0806419	0.050846	-0.00838	-0.027264
chr6:25521673-25521714	0.000155	0.071979	0.0828952	0.071979	0.0827406	0
chr6:25548802-25548843	-0.0614869	0.1094	-0.000445	0.1094	0.0610418	0
chr6:29929332-29929373	-0.161958	0.12214	-0.205253	0.12214	-0.043295	0
chr6:30137357-30137398	-0.0409502	0.057981	0.0356008	0.073126	0.076551	0.015145
chr6:30756245-30756286	-0.135349	0.071979	-0.0867792	0.054941	0.0485698	-0.017038
chr6:31251187-31251228	-0.114286	0.085835	-0.0469684	0.085835	0.0673176	0
chr6:31271721-31271762	-0.10928	0.073126	-0.10928	0.073126	0	0
chr6:31432495-31432536	-0.11251	0.049968	-0.11251	0.049968	0	0
chr6:31423604-31423645	-0.0837178	0.066283	-0.0289723	0.066283	0.0547455	0
chr6:31423604-31423645	-0.0837178	0.066283	-0.0393725	0.066283	0.0443453	0
chr6:31452441-31452482	0.241334	0.10094	0.263099	0.10094	0.021765	0
chr6:31615515-31615556	-0.281854	0.050002	-0.346546	0.037404	-0.064692	-0.012598
chr6:31724589-31724630	-0.0310387	0.078823	-0.0382571	0.078823	-0.0072184	0
chr6:33584405-33584446	0.0162412	0.071979	0.0443991	0.071979	0.0281579	0
chr6:34938371-34938412	-0.0077531	0.067202	-0.0077531	0.067202	0	0
chr6:34938371-34938412	-0.0077531	0.067202	-0.0955135	0.067202	-0.0877604	0
chr6:36458293-36458334	0.248856	0.073126	0.2647	0.081258	0.015844	0.008132
chr6:36526288-36526329	-0.0820334	0.06339	0.0964303	0.06339	0.178464	0
chr6:36556797-36556838	-0.818149	0.054941	-0.818149	0.054941	0	0
chr6:36556797-36556838	-0.818149	0.054941	-0.817408	0.079059	0.000741	0.024118
chr6:36755138-36755179	-0.214178	0.067202	-0.145643	0.050002	0.068535	-0.0172
chr7:5489434-5489475	-0.104112	0.073126	-0.104112	0.073126	0	0
chr7:6462716-6462757	0.253662	0.10157	0.20655	0.10157	-0.047112	0
chr7:6462716-6462757	0.253662	0.10157	0.297369	0.10157	0.043707	0
chr7:16658622-16658663	0.30818	0.073126	0.178061	0.073126	-0.130119	0
chr7:16658622-16658663	0.30818	0.073126	0.30818	0.073126	0	0
chr7:17972614-17972655	-0.533854	0.071979	-0.466694	0.07716	0.06716	0.005181
chr7:37396096-37396137	0.359339	0.18127	0.359339	0.18127	0	0
chr7:37417736-37417777	-0.284208	0.062602	-0.284208	0.062602	0	0
chr7:37417736-37417777	-0.284208	0.062602	-0.232566	0.062602	0.051642	0
chr7:44857803-44857844	-0.0199685	0.094481	-0.0340821	0.094481	-0.0141136	0
chr7:50304461-50304502	-0.0241657	0.073126	0.000222	0.074034	0.024388	0.000908
chr7:73626464-73626505	-0.641836	0.10119	-0.641836	0.10119	0	0
chr7:73626464-73626505	-0.641836	0.10119	-0.77376	0.10119	-0.131924	0
chr7:73734952-73734993	-0.0518334	0.057981	-0.0886188	0.057981	-0.0367854	0
chr7:73734952-73734993	-0.0518334	0.057981	-0.0874198	0.057981	-0.0355864	0
chr7:76140652-76140693	0.0826983	0.21058	0.0826983	0.21058	0	0
chr7:80586869-80586910	-0.156386	0.052461	-0.379102	0.065986	-0.222716	0.013525
chr7:80586869-80586910	-0.156386	0.052461	-0.183705	0.065986	-0.027319	0.013525
chr7:100664274-100664315	-0.088825	0.1094	-0.088825	0.1094	0	0
chr7:101856630-101856671	-0.0458255	0.049968	-0.0458255	0.049968	0	0
chr7:101856630-101856671	-0.0458255	0.049968	-0.112224	0.049968	-0.0663985	0
chr7:106731753-106731794	0.110615	0.1498	-0.0225604	0.054028	-0.133175	-0.095772
chr7:106731753-106731794	0.110615	0.1498	-0.0365012	0.04349	-0.147116	-0.10631
chr7:116884438-116884479	-0.235104	0.093489	-0.235104	0.093489	0	0
chr7:123765987-123766028	0.263703	0.21648	0.135189	0.17	-0.128514	-0.04648
chr7:123799008-123799049	-0.0875654	0.082035	-0.0681717	0.082035	0.0193937	0
chr7:129571628-129571669	0.144732	0.081939	0.0678687	0.081939	-0.0768633	0
chr7:129571628-129571669	0.144732	0.081939	0.0850593	0.081939	-0.0596727	0
chr7:130016016-130016057	-0.12574	0.081258	-0.101789	0.050002	0.023951	-0.031256
chr7:134315973-134316014	-0.664429	0.10335	-0.868828	0.10335	-0.204399	0
chr7:135661494-135661535	0.439589	0.24459	0.268875	0.24459	-0.170714	0
chr7:135661494-135661535	0.439589	0.24459	0.198524	0.24459	-0.241065	0
chr7:135972186-135972227	0.120129	0.15747	0.120129	0.15747	0	0
chr7:68130501-68130542	0.190821	0.11838	0.190783	0.11838	-3.8e-05	0
chr3:184509775-184509816	0.0260139	0.087912	-0.0548004	0.10391	-0.0808143	0.015998
chr7:64752120-64752161	-0.144532	0.11625	-0.212539	0.11625	-0.068007	0
chr12:62466997-62467038	0.100168	0.073126	0.124241	0.094209	0.024073	0.021083
chr14:73423228-73423269	0.285424	0.081939	0.0656889	0.078123	-0.219735	-0.003816
chr4:69591283-69591324	-0.185648	0.073049	-0.046636	0.07355	0.139012	0.000501
chr5:35045620-35045661	-0.113657	0.053407	-0.113657	0.053407	0	0
chr5:35045620-35045661	-0.113657	0.053407	-0.0958018	0.053407	0.0178552	0
chr12:242281-242322	0.0116202	0.11838	-0.0456721	0.079685	-0.0572923	-0.038695
chr12:242281-242322	0.0116202	0.11838	0.0614583	0.24888	0.0498381	0.1305
chr5:151314325-151314366	-0.119092	0.07716	-0.114395	0.073126	0.004697	-0.004034
chr19:32865965-32866006	-0.417289	0.038335	-0.377289	0.038335	0.04	0
chr19:32865965-32866006	-0.417289	0.038335	-0.417289	0.038335	0	0
chr2:73641181-73641222	0.146375	0.10119	0.090402	0.10119	-0.055973	0
chr2:73641181-73641222	0.146375	0.10119	0.146375	0.10119	0	0
chr9:133269995-133270036	-1.22865	0.049632	-1.22865	0.049632	0	0
chr9:133269995-133270036	-1.22865	0.049632	-0.998197	0.049632	0.230453	0
chr11:81225187-81225228	-0.141497	0.081939	-0.17266	0.081939	-0.031163	0
chr10:98388399-98388440	-0.149456	0.057969	-0.151268	0.06445	-0.001812	0.006481
chr10:98388399-98388440	-0.149456	0.057969	-0.193878	0.060305	-0.044422	0.002336
chr22:43928827-43928868	0.0243479	0.18532	0.0133438	0.19691	-0.0110041	0.01159
chr22:43928827-43928868	0.0243479	0.18532	0.00439436	0.19691	-0.0199535	0.01159
chr21:34977904-34977945	-0.876923	0.059259	-0.95109	0.059259	-0.074167	0
chr21:37451249-37451290	-0.0297801	0.079012	-0.0842951	0.079012	-0.054515	0
chr21:38466092-38466133	-0.323556	0.07716	-0.357097	0.07716	-0.033541	0
chr21:43559770-43559811	-0.736052	0.079685	-0.736052	0.079685	0	0
chr21:44849591-44849632	-0.0584087	0.066283	-0.0932027	0.066283	-0.034794	0
chr21:46484652-46484693	-0.0628104	0.10094	-0.0628104	0.10094	0	0
chr22:24375967-24376008	-0.64285	0.057938	-0.582037	0.057938	0.060813	0
chr22:27614955-27614996	0.000742	0.11456	-0.0724306	0.11456	-0.0731731	0
chr22:27785391-27785432	-0.0661556	0.1094	-0.13067	0.1094	-0.0645144	0
chr22:27785391-27785432	-0.0661556	0.1094	-0.0661556	0.1094	0	0
chr22:28707209-28707250	-0.0795738	0.048466	-0.0173932	0.048466	0.0621806	0
chr22:30042438-30042479	-0.120579	0.087265	-0.0896732	0.087265	0.0309058	0
chr22:30673473-30673514	-0.0405663	0.057969	-0.0893035	0.057969	-0.0487372	0
chr22:30687244-30687285	-0.01902	0.079012	-0.089746	0.079012	-0.070726	0
chr22:32475220-32475261	-0.0702198	0.073126	-0.047768	0.073126	0.0224518	0
chr22:32503038-32503079	0.0213946	0.15747	0.18819	0.15747	0.166795	0
chr22:36281848-36281889	-0.0814129	0.071436	0.125979	0.1062	0.207392	0.034764
chr22:36362482-36362523	-0.126888	0.080149	-0.147319	0.080149	-0.020431	0
chr22:36362482-36362523	-0.126888	0.080149	-0.217952	0.080149	-0.091064	0
chr22:38728887-38728928	0.0509433	0.078606	0.000474	0.078606	-0.0504694	0
chr22:41403743-41403784	-0.275006	0.039485	-0.211925	0.071979	0.063081	0.032494
chr22:50511362-50511403	-0.184212	0.062602	-0.184212	0.062602	0	0
chr22:50526413-50526454	-0.009794	0.073126	-0.0202844	0.073126	-0.0104904	0
chr22:50532817-50532858	-0.16648	0.24888	-0.0059789	0.24888	0.160501	0
chr22:50532817-50532858	-0.16648	0.24888	-0.0528467	0.24888	0.113633	0
chr22:50532817-50532858	-0.16648	0.24888	-0.0858368	0.24888	0.0806432	0
chr22:50554776-50554817	0.323638	0.17246	0.323638	0.17246	0	0
chrX:1466166-1466207	-0.0735962	0.10603	-0.068552	0.10603	0.0050442	0
chr19:17114298-17114339	-0.227238	0.073126	-0.259773	0.073126	-0.032535	0
chr19:17114298-17114339	-0.227238	0.073126	-0.227238	0.073126	0	0
chr19:17141211-17141252	-0.0391524	0.04949	-0.0079704	0.04949	0.031182	0
chr19:17142144-17142185	-1.10124	0.042135	-1.02054	0.042135	0.0807	0
chr19:17999745-17999786	-0.0424639	0.073126	-0.0142528	0.078123	0.0282111	0.004997
chr19:18304914-18304955	-0.0763171	0.11456	-0.0763171	0.11456	0	0
chr19:19367193-19367234	-0.147542	0.05832	-0.147542	0.05832	0	0
chr19:19367193-19367234	-0.147542	0.05832	-0.0238129	0.05832	0.123729	0
chr19:32581159-32581200	-0.0320377	0.073126	-0.0320377	0.073126	0	0
chr19:32581159-32581200	-0.0320377	0.073126	-0.0209387	0.073126	0.011099	0
chr19:32582505-32582546	-0.0610257	0.07716	-0.103875	0.073126	-0.0428493	-0.004034
chr19:32582505-32582546	-0.0610257	0.07716	-0.0386043	0.073126	0.0224214	-0.004034
chr19:33249365-33249406	-0.14982	0.071979	-0.13826	0.050002	0.01156	-0.021977
chr19:33263622-33263663	-0.0875694	0.073126	-0.0932406	0.073126	-0.0056712	0
chr19:33263622-33263663	-0.0875694	0.073126	-0.0875694	0.073126	0	0
chr19:33264438-33264479	-0.167261	0.073126	-0.167261	0.073126	0	0
chr19:33264438-33264479	-0.167261	0.073126	-0.23932	0.073126	-0.072059	0
chr19:33358195-33358236	0.216653	0.081939	0.204672	0.081939	-0.011981	0
chr19:33401483-33401524	-0.0979892	0.073126	-0.0592084	0.073126	0.0387808	0
chr19:33401483-33401524	-0.0979892	0.073126	-0.0979892	0.073126	0	0
chr19:35068550-35068591	-0.127373	0.07716	-0.0710214	0.07716	0.0563516	0
chr19:40344320-40344361	-0.161824	0.079956	-0.151954	0.079956	0.00987	0
chr19:40442141-40442182	0.0557141	0.12214	0.00324949	0.12214	-0.0524646	0
chr19:44908802-44908843	0.0096144	0.061102	0.000379	0.06445	-0.0092352	0.003348
chr19:44908802-44908843	0.0096144	0.061102	0.00569712	0.061102	-0.0039173	0
chr19:44908802-44908843	0.0096144	0.061102	-0.0366828	0.061102	-0.0462972	0
chr19:45239857-45239898	-0.23408	0.047696	-0.261603	0.047696	-0.027523	0
chr19:45678114-45678155	-0.117251	0.073126	-0.117251	0.073126	0	0
chr19:45678114-45678155	-0.117251	0.073126	-0.103124	0.071979	0.014127	-0.001147
chr19:48629590-48629631	-0.105734	0.073126	-0.0511504	0.073126	0.0545836	0
chr19:52922231-52922272	-0.0489931	0.078823	-0.0489931	0.078823	0	0
chr19:55228425-55228466	-0.132957	0.075947	-0.0929601	0.075947	0.0399969	0
chr19:57643437-57643478	0.0175931	0.057981	0.0175931	0.057981	0	0
chr19:58506030-58506071	-0.137875	0.078123	-0.137875	0.078123	0	0
chr20:3767092-3767133	-0.0843593	0.086519	-0.169664	0.086519	-0.0853047	0
chr20:3797375-3797416	0.0525265	0.057668	0.13712	0.11456	0.0845935	0.056892
chr20:4176405-4176446	-0.109689	0.07716	-0.121513	0.061761	-0.011824	-0.015399
chr20:4176405-4176446	-0.109689	0.07716	-0.130664	0.071979	-0.020975	-0.005181
chr20:31769189-31769230	-0.921095	0.074884	-0.921095	0.074884	0	0
chr20:32552343-32552384	-0.223249	0.081338	-0.166088	0.081338	0.057161	0
chr20:32652107-32652148	-0.151348	0.073126	-0.0997923	0.073126	0.0515557	0
chr20:37047089-37047130	-0.0918489	0.081939	-0.168958	0.081939	-0.0771091	0
chr20:37047089-37047130	-0.0918489	0.081939	-0.235024	0.081939	-0.143175	0
chr20:39934583-39934624	-0.0668622	0.082035	-0.0803627	0.086519	-0.0135005	0.004484
chr20:39934583-39934624	-0.0668622	0.082035	-0.0668622	0.082035	0	0
chr20:43622782-43622823	-0.0294724	0.072668	0.0873846	0.080149	0.116857	0.007481
chr20:44210801-44210842	-0.0428728	0.073126	-0.0600968	0.073126	-0.017224	0
chr20:45941271-45941312	-0.0153678	0.055066	0.0285934	0.055899	0.0439612	0.000833
chr20:45941271-45941312	-0.0153678	0.055066	0.0497073	0.045829	0.0650751	-0.009237
chr20:48823663-48823704	-0.0918415	0.055038	-0.0918415	0.055038	0	0
chr20:50483488-50483529	0.0364734	0.10335	0.0393718	0.10335	0.0028984	0
chr20:53570278-53570319	-0.178379	0.066283	-0.144838	0.066283	0.033541	0
chr20:53605547-53605588	0.185072	0.061761	0.185072	0.061761	0	0
chr20:53605547-53605588	0.185072	0.061761	0.168415	0.061761	-0.016657	0
chr20:53937325-53937366	-0.576765	0.13283	-0.393209	0.17	0.183556	0.03717
chr20:57413282-57413323	-0.0553848	0.079956	-0.0508989	0.10603	0.0044859	0.026074
chr20:57396733-57396774	-0.114284	0.068819	-0.114284	0.068819	0	0
chr20:57415294-57415335	0.0409454	0.11838	-0.153197	0.071979	-0.194142	-0.046401
chr20:57416561-57416602	-0.057017	0.040506	-0.0504026	0.066736	0.0066144	0.02623
chr20:57416561-57416602	-0.057017	0.040506	-0.112246	0.05614	-0.055229	0.015634
chr20:62105202-62105243	0.0025041	0.057938	0.0674678	0.057938	0.0649637	0
chr20:63563714-63563755	-0.0246179	0.08447	-0.0672868	0.08447	-0.0426689	0
chr20:63923440-63923481	-0.71215	0.04081	-0.71215	0.04081	0	0
chr20:64080086-64080127	-0.0790851	0.073126	-0.0179512	0.073126	0.0611339	0
chr20:64080086-64080127	-0.0790851	0.073126	-0.0790851	0.073126	0	0
chr21:33753972-33754013	-0.28594	0.069202	-0.219863	0.069202	0.066077	0
chr21:33753972-33754013	-0.28594	0.069202	-0.28594	0.069202	0	0
chr16:71765836-71765877	-0.130276	0.078662	-0.0402994	0.078662	0.0899766	0
chr16:73878669-73878710	0.361738	0.10335	0.20026	0.074034	-0.161478	-0.029316
chr16:73878669-73878710	0.361738	0.10335	0.163201	0.074034	-0.198537	-0.029316
chr16:85688183-85688224	0.195133	0.07716	0.132355	0.073126	-0.062778	-0.004034
chr17:7830495-7830536	0.0727345	0.11456	0.0918006	0.11456	0.0190661	0
chr17:7830495-7830536	0.0727345	0.11456	0.111071	0.11456	0.0383365	0
chr17:31381117-31381158	-0.0500516	0.1174	-0.119537	0.11856	-0.0694854	0.00116
chr17:46086937-46086978	-0.460035	0.043055	-0.460035	0.043055	0	0
chr17:80554931-80554972	-0.0562655	0.071436	0.0398657	0.073115	0.0961312	0.001679
chr18:55420733-55420774	-0.206155	0.055066	-0.131138	0.055066	0.075017	0
chr18:55420733-55420774	-0.206155	0.055066	-0.206155	0.055066	0	0
chr19:48738699-48738740	-0.0792172	0.10094	-0.0777334	0.10094	0.0014838	0
chr20:18675866-18675907	-0.0799811	0.079956	-0.188118	0.079956	-0.108137	0
chr21:33060725-33060766	-0.270308	0.049545	-0.193984	0.050002	0.076324	0.000457
chr21:33060725-33060766	-0.270308	0.049545	-0.232756	0.073126	0.037552	0.023581
chr22:41420628-41420669	-0.221356	0.071436	-0.158344	0.071436	0.063012	0
chr22:41420628-41420669	-0.221356	0.071436	-0.221356	0.071436	0	0
chr22:46085723-46085764	-0.0060969	0.078123	-0.176759	0.078123	-0.170662	0
chr1:65954202-65954243	0.154756	0.21058	0.0911692	0.21058	-0.0635868	0
chr1:73382907-73382948	0.0258749	0.24673	0.100099	0.24673	0.0742241	0
chr2:27508053-27508094	0.0265136	0.073126	0.00150158	0.073126	-0.025012	0
chr2:27508053-27508094	0.0265136	0.073126	0.0265136	0.073126	0	0
chr2:27508053-27508094	0.0265136	0.073126	0.0125888	0.073126	-0.0139248	0
chr2:27508053-27508094	0.0265136	0.073126	0.0150606	0.081338	-0.011453	0.008212
chr2:44914021-44914062	-0.203611	0.048014	-0.203611	0.048014	0	0
chr2:57815086-57815127	-0.165724	0.08447	-0.165724	0.08447	0	0
chr2:57815086-57815127	-0.165724	0.08447	-0.224964	0.059259	-0.05924	-0.025211
chr2:103517954-103517995	-0.134911	0.047573	-0.0292639	0.068819	0.105647	0.021246
chr2:137506641-137506682	-0.187184	0.079685	-0.15153	0.079685	0.035654	0
chr2:226299917-226299958	-0.14833	0.048384	-0.194341	0.048384	-0.046011	0
chr3:85464623-85464664	0.119405	0.12432	0.0772247	0.12432	-0.0421803	0
chr4:39403232-39403273	0.652101	0.081939	0.60875	0.081939	-0.043351	0
chr4:98792179-98792220	-0.0620985	0.047788	-0.132094	0.04168	-0.0699955	-0.006108
chr4:98792179-98792220	-0.0620985	0.047788	-0.0587651	0.04168	0.0033334	-0.006108
chr4:99107974-99108015	-0.0530188	0.088537	-0.0530188	0.088537	0	0
chr11:8646515-8646556	-0.13227	0.069989	-0.151178	0.069989	-0.018908	0
chr11:27626804-27626845	-0.208372	0.071436	-0.310664	0.071436	-0.102292	0
chr11:27626804-27626845	-0.208372	0.071436	-0.274613	0.071436	-0.066241	0
chr11:33182593-33182634	0.0135866	0.1094	0.0135866	0.1094	0	0
chr11:46321372-46321413	-1.04945	0.054204	-1.00123	0.070779	0.04822	0.016575
chr11:47407674-47407715	0.028349	0.074784	0.028349	0.074784	0	0
chr11:113493949-113493990	-0.0412038	0.1909	-0.0412038	0.1909	0	0
chr11:113493949-113493990	-0.0412038	0.1909	0.0528745	0.1909	0.0940783	0
chr11:113767435-113767476	-0.104576	0.067801	-0.131061	0.067801	-0.026485	0
chr11:116220115-116220156	-0.0698476	0.074784	0.0375071	0.074784	0.107355	0
chr11:121672195-121672236	-0.156899	0.078823	-0.188578	0.078505	-0.031679	-0.000318
chr11:121672195-121672236	-0.156899	0.078823	-0.148452	0.074784	0.008447	-0.004039
chr12:49869345-49869386	-0.0900921	0.065635	-0.128455	0.048466	-0.0383629	-0.017169
chr12:49869345-49869386	-0.0900921	0.065635	-0.112539	0.073126	-0.0224469	0.007491
chr12:51485027-51485068	-0.172489	0.052992	-0.111581	0.048384	0.060908	-0.004608
chr12:81214259-81214300	0.067239	0.073126	0.0170951	0.061102	-0.0501439	-0.012024
chr12:87393684-87393725	-0.359987	0.062602	-0.331133	0.062602	0.028854	0
chr12:91679761-91679802	-0.658159	0.039479	-0.155671	0.11019	0.502488	0.070711
chr13:67514893-67514934	0.0562872	0.11856	0.071019	0.11856	0.0147318	0
chr14:56817230-56817271	0.0918024	0.07716	0.0574207	0.063879	-0.0343817	-0.013281
chr14:56817230-56817271	0.0918024	0.07716	0.0627518	0.063879	-0.0290506	-0.013281
chr14:58277014-58277055	-0.452386	0.081939	-0.529933	0.081939	-0.077547	0
chr14:58277014-58277055	-0.452386	0.081939	-0.512691	0.11456	-0.060305	0.032621
chr14:94378590-94378631	-0.0404833	0.061761	-0.0404833	0.061761	0	0
chr14:94378590-94378631	-0.0404833	0.061761	-0.0808118	0.071979	-0.0403285	0.010218
chr15:47392842-47392883	-0.117614	0.072152	-0.129154	0.072152	-0.01154	0
chr15:74735519-74735560	0.052931	0.071436	0.0985984	0.071436	0.0456674	0
chr15:74735519-74735560	0.052931	0.071436	0.201475	0.081939	0.148544	0.010503
chr15:86310500-86310541	-0.0522378	0.053713	-0.0592801	0.065348	-0.0070423	0.011635
chr16:24681707-24681748	-0.061595	0.081338	-0.0460351	0.081338	0.0155599	0
chr16:24681707-24681748	-0.061595	0.081338	-0.061595	0.081338	0	0
chr16:28483482-28483523	0.42213	0.081939	0.338208	0.081939	-0.083922	0
chr16:30080707-30080748	0.435238	0.1174	0.224843	0.1174	-0.210395	0
chr16:53769642-53769683	-0.168627	0.079012	-0.229014	0.079012	-0.060387	0
chr16:53769642-53769683	-0.168627	0.079012	-0.382743	0.079012	-0.214116	0
chr4:99318142-99318183	0.0187408	0.1174	0.0370194	0.1174	0.0182786	0
chr4:99318142-99318183	0.0187408	0.1174	-0.0015915	0.1174	-0.0203323	0
chr4:99318142-99318183	0.0187408	0.1174	0.0187408	0.1174	0	0
chr4:99318142-99318183	0.0187408	0.1174	0.103211	0.1174	0.0844702	0
chr4:99489045-99489086	0.0196528	0.07716	0.0196528	0.07716	0	0
chr4:99963943-99963984	-0.0704438	0.07716	-0.073644	0.060086	-0.0032002	-0.017074
chr4:100577873-100577914	-0.215456	0.051462	-0.227482	0.073126	-0.012026	0.021664
chr4:102276905-102276946	-0.225408	0.078662	-0.225408	0.078662	0	0
chr4:102276905-102276946	-0.225408	0.078662	-0.0379734	0.12479	0.187435	0.046128
chr7:153791969-153792010	-0.0634894	0.046557	-0.149461	0.046557	-0.0859716	0
chr8:56512295-56512336	-0.246612	0.057981	-0.136786	0.057981	0.109826	0
chr10:71148174-71148215	-0.154279	0.070615	0.0172676	0.071915	0.171547	0.0013
chr10:108778056-108778097	-0.203776	0.071436	-0.105108	0.071436	0.098668	0
chr10:109006865-109006906	-0.2022	0.061249	-0.0556525	0.061249	0.146547	0
chr11:47402350-47402391	-0.850817	0.041188	-0.850817	0.041188	0	0
chr11:57713131-57713172	-0.12268	0.045237	-0.178371	0.045237	-0.055691	0
chr12:51510056-51510097	0.0372958	0.073126	-0.0842893	0.073126	-0.121585	0
chr14:58299165-58299206	-0.18711	0.073126	-0.213483	0.073126	-0.026373	0
chr14:58299165-58299206	-0.18711	0.073126	-0.18711	0.073126	0	0
chr14:103889526-103889567	-0.223186	0.057981	-0.223186	0.057981	0	0
chr16:53786881-53786922	0.0733338	0.071979	0.0733338	0.071979	0	0
chr19:48703140-48703181	0.0161415	0.085835	0.0969303	0.085835	0.0807888	0
chr19:48703140-48703181	0.0161415	0.085835	0.0806908	0.085835	0.0645493	0
chr19:48703140-48703181	0.0161415	0.085835	0.0161415	0.085835	0	0
chr14:102527708-102527749	-0.157223	0.073126	-0.157223	0.073126	0	0
chr14:102527708-102527749	-0.157223	0.073126	-0.170694	0.073126	-0.013471	0
chr14:103384915-103384956	-0.0841975	0.071979	-0.0513782	0.10603	0.0328193	0.034051
chr14:103384915-103384956	-0.0841975	0.071979	-0.0841975	0.071979	0	0
chr14:105293483-105293524	0.0767885	0.063879	0.110323	0.065348	0.0335345	0.001469
chr15:31260774-31260815	-0.145443	0.07811	0.123343	0.24673	0.268786	0.16862
chr15:31309864-31309905	-0.419605	0.062602	-0.40475	0.062602	0.014855	0
chr15:36578034-36578075	0.207244	0.081939	0.221512	0.081939	0.014268	0
chr15:40456499-40456540	-0.204028	0.066283	-0.245687	0.066283	-0.041659	0
chr15:50442079-50442120	0.176589	0.081939	0.154461	0.081939	-0.022128	0
chr15:51718787-51718828	-0.231413	0.044725	-0.194472	0.045333	0.036941	0.000608
chr15:56253767-56253808	-0.0398622	0.10094	-0.0029787	0.10094	0.0368835	0
chr15:56253767-56253808	-0.0398622	0.10094	-0.0398622	0.10094	0	0
chr15:62561866-62561907	0.226001	0.086519	0.232368	0.086519	0.006367	0
chr15:65457322-65457363	-0.126229	0.057981	-0.0138408	0.057981	0.112388	0
chr15:69436690-69436731	0.0334598	0.10094	0.0441752	0.10094	0.0107154	0
chr15:75098686-75098727	0.0285982	0.074784	0.0285982	0.074784	0	0
chr15:75206383-75206424	-0.192718	0.057981	-0.186581	0.073126	0.006137	0.015145
chr15:78244877-78244918	-0.209097	0.044989	-0.134124	0.073126	0.074973	0.028137
chr15:85619672-85619713	-0.251633	0.07716	-0.262053	0.072614	-0.01042	-0.004546
chr16:120309-120350	0.0581212	0.045829	-0.0089901	0.045829	-0.0671113	0
chr16:120057-120098	-0.0410764	0.24888	-0.0011991	0.24888	0.0398773	0
chr16:120057-120098	-0.0410764	0.24888	-0.0791072	0.24888	-0.0380308	0
chr16:182378-182419	-0.123909	0.059259	-0.123909	0.059259	0	0
chr16:227380-227421	-0.264646	0.072668	-0.264646	0.072668	0	0
chr16:583744-583785	0.0870142	0.071173	0.0567868	0.071173	-0.0302274	0
chr16:581732-581773	-0.50647	0.071979	-0.55652	0.071979	-0.05005	0
chr11:95153448-95153489	0.0858427	0.073126	0.0273434	0.073126	-0.0584993	0
chr11:95153448-95153489	0.0858427	0.073126	0.0606823	0.073126	-0.0251604	0
chr11:95578076-95578117	-0.186982	0.046614	-0.186982	0.046614	0	0
chr11:95578076-95578117	-0.186982	0.046614	-0.30606	0.046614	-0.119078	0
chr11:100623244-100623285	-0.0332068	0.075947	0.000541	0.075947	0.033748	0
chr11:108475356-108475397	-0.315852	0.066283	-0.340917	0.066283	-0.025065	0
chr11:108475356-108475397	-0.315852	0.066283	-0.340259	0.066283	-0.024407	0
chr11:108272709-108272750	-0.113326	0.071979	-0.0882022	0.071979	0.0251238	0
chr11:111774080-111774121	-0.752739	0.071979	-0.752739	0.071979	0	0
chr11:114110499-114110540	0.108171	0.087265	0.108171	0.087265	0	0
chr11:114110499-114110540	0.108171	0.087265	-0.060071	0.087265	-0.168242	0
chr11:116778181-116778222	-0.142146	0.11456	-0.136509	0.071979	0.005637	-0.042581
chr11:116778181-116778222	-0.142146	0.11456	-0.133508	0.062119	0.008638	-0.052441
chr11:116778181-116778222	-0.142146	0.11456	-0.125736	0.069989	0.01641	-0.044571
chr11:116778181-116778222	-0.142146	0.11456	-0.142146	0.11456	0	0
chr11:116779559-116779600	-0.688237	0.10619	-0.688237	0.10619	0	0
chr11:116779559-116779600	-0.688237	0.10619	-0.78564	0.10619	-0.097403	0
chr11:117148028-117148069	-0.936953	0.1498	-0.903062	0.1498	0.033891	0
chr11:119097028-119097069	-0.17695	0.073115	-0.196364	0.073115	-0.019414	0
chr11:119173806-119173847	-0.117447	0.06445	-0.117447	0.06445	0	0
chr11:128067851-128067892	0.00423884	0.21058	0.0675064	0.21058	0.0632676	0
chr12:3962052-3962093	0.115531	0.10335	0.141191	0.10335	0.02566	0
chr12:4221322-4221363	-0.0641872	0.08817	-0.0634624	0.08817	0.000725	0
chr12:6616351-6616392	0.206389	0.10157	0.206389	0.10157	0	0
chr12:7023690-7023731	-0.0888488	0.071979	-0.0823216	0.061761	0.0065272	-0.010218
chr12:8037590-8037631	-0.190501	0.067801	-0.190501	0.067801	0	0
chr12:10444101-10444142	0.220674	0.10094	0.220674	0.10094	0	0
chr12:11869542-11869583	-0.0070086	0.073126	-0.0070086	0.073126	0	0
chr12:12726300-12726341	-0.0241426	0.12214	-0.0241426	0.12214	0	0
chr12:12726300-12726341	-0.0241426	0.12214	-0.0250798	0.12214	-0.000937	0
chr12:12969114-12969155	-0.0817999	0.12214	-0.0903023	0.043324	-0.0085024	-0.078816
chr12:14398455-14398496	-0.701177	0.061251	-0.701177	0.061251	0	0
chr12:21178595-21178636	-0.335306	0.052535	-0.122556	0.16459	0.21275	0.112055
chr12:21178595-21178636	-0.335306	0.052535	-0.322226	0.052535	0.01308	0
chr12:31964247-31964288	-0.46375	0.07355	-0.570479	0.07355	-0.106729	0
chr12:47784710-47784751	-0.165242	0.062602	-0.099395	0.073126	0.065847	0.010524
chr12:52915965-52916006	-0.0779936	0.17246	-0.0779936	0.17246	0	0
chr12:53364027-53364068	-0.302114	0.071173	-0.261852	0.1094	0.040262	0.038227
chr12:53364027-53364068	-0.302114	0.071173	-0.302114	0.071173	0	0
chr12:54292076-54292117	-0.218179	0.055145	-0.169257	0.055145	0.048922	0
chr12:54292076-54292117	-0.218179	0.055145	-0.240331	0.055145	-0.022152	0
chr12:56752265-56752306	-0.0311908	0.07716	-0.0311908	0.07716	0	0
chr12:56752265-56752306	-0.0311908	0.07716	-0.0487674	0.07716	-0.0175766	0
chr12:68786129-68786170	-0.177724	0.069442	-0.204988	0.059233	-0.027264	-0.010209
chr12:88417892-88417933	-0.0649096	0.07716	-0.0767799	0.07716	-0.0118703	0
chr12:93413915-93413956	0.308046	0.10603	0.316018	0.10603	0.007972	0
chr12:93413915-93413956	0.308046	0.10603	0.308046	0.10603	0	0
chr12:111467421-111467462	0.0296981	0.081939	0.0631505	0.081939	0.0334524	0
chr12:111654638-111654679	-0.163254	0.081338	-0.119975	0.081338	0.043279	0
chr12:112541211-112541252	-0.0339308	0.071436	-0.0339308	0.071436	0	0
chr12:120485026-120485067	-0.181546	0.057981	-0.185182	0.057981	-0.003636	0
chr12:120719712-120719753	-0.0055985	0.064582	-0.0158968	0.064582	-0.0102983	0
chr12:121739396-121739437	-0.12782	0.07716	-0.21658	0.07716	-0.08876	0
chr12:122133422-122133463	-0.105572	0.057981	-0.105572	0.057981	0	0
chr12:122133422-122133463	-0.105572	0.057981	-0.0140857	0.16512	0.0914863	0.107139
chr12:124020877-124020918	-0.221273	0.068819	-0.173954	0.11456	0.047319	0.045741
chr12:124020877-124020918	-0.221273	0.068819	-0.221273	0.068819	0	0
chr12:131949826-131949867	-0.0785728	0.073126	-0.072219	0.073126	0.0063538	0
chr12:131949826-131949867	-0.0785728	0.073126	-0.0805318	0.073126	-0.001959	0
chr12:132720003-132720044	0.354778	0.099993	0.160697	0.074784	-0.194081	-0.025209
chr13:28039836-28039877	0.0138364	0.078662	0.0665621	0.082035	0.0527257	0.003373
chr13:30497131-30497172	-0.0609783	0.069202	-0.0584807	0.061824	0.0024976	-0.007378
chr13:40586422-40586463	0.228039	0.081338	0.200208	0.081338	-0.027831	0
chr13:40586422-40586463	0.228039	0.081338	0.228039	0.081338	0	0
chr13:41005653-41005694	-0.0114106	0.061251	-0.0114106	0.061251	0	0
chr13:70662459-70662500	-0.776873	0.075272	-0.776873	0.075272	0	0
chr13:70662459-70662500	-0.776873	0.075272	-0.708808	0.049334	0.068065	-0.025938
chr13:72744981-72745022	0.160962	0.10603	0.129339	0.10603	-0.031623	0
chr13:75484997-75485038	-0.18645	0.078606	-0.18645	0.078606	0	0
chr13:78438847-78438888	0.193163	0.087912	0.139611	0.087912	-0.053552	0
chr13:108769758-108769799	-0.0554444	0.24888	0.0831099	0.24888	0.138554	0
chr13:109755448-109755489	0.0585402	0.10157	0.0441774	0.10157	-0.0143628	0
chr13:113255005-113255046	-0.17841	0.073049	-0.148165	0.073049	0.030245	0
chr13:113543184-113543225	-0.17159	0.073126	-0.17159	0.073126	0	0
chr13:113843556-113843597	-0.0765962	0.071979	-0.0809981	0.071979	-0.0044019	0
chr13:113843556-113843597	-0.0765962	0.071979	-0.0694197	0.071979	0.0071765	0
chr14:24404967-24405008	-0.203497	0.071979	-0.203497	0.071979	0	0
chr14:24404967-24405008	-0.203497	0.071979	-0.271667	0.071979	-0.06817	0
chr14:37218905-37218946	-0.975809	0.051023	-0.975809	0.051023	0	0
chr14:64784018-64784059	0.0796304	0.087265	0.0796304	0.087265	0	0
chr14:64793489-64793530	-0.0413752	0.073126	-0.0394735	0.073126	0.0019017	0
chr14:64806119-64806160	-0.0853435	0.10619	-0.0853435	0.10619	0	0
chr14:64816215-64816256	-0.120132	0.061761	-0.120132	0.061761	0	0
chr14:64835240-64835281	-0.478788	0.054941	-0.478788	0.054941	0	0
chr14:64878932-64878973	-0.15409	0.073126	-0.0877498	0.073126	0.0663402	0
chr14:65020956-65020997	0.164026	0.072614	0.164026	0.072614	0	0
chr14:65020956-65020997	0.164026	0.072614	0.150649	0.072614	-0.013377	0
chr14:67940763-67940804	-0.433834	0.10835	-0.564762	0.10835	-0.130928	0
chr14:69616910-69616951	-0.149959	0.060305	-0.156054	0.07716	-0.006095	0.016855
chr14:95536841-95536882	-0.012971	0.061761	-0.012971	0.061761	0	0
chr14:95536841-95536882	-0.012971	0.061761	0.006918	0.061761	0.019889	0
chr14:100715524-100715565	0.00389865	0.065635	0.00912327	0.050002	0.00522462	-0.015633
chr11:98216851-98216892	0.406615	0.14748	0.406615	0.14748	0	0
chr3:160011848-160011889	0.0634924	0.082035	0.15801	0.082035	0.0945176	0
chr3:183662227-183662268	-0.0060965	0.08447	-0.0909541	0.08447	-0.0848576	0
chr3:183662227-183662268	-0.0060965	0.08447	-0.0906836	0.08447	-0.0845871	0
chr6:42893988-42894029	-0.0426685	0.076626	-0.0426685	0.076626	0	0
chr6:42893988-42894029	-0.0426685	0.076626	-0.248064	0.039011	-0.205396	-0.037615
chr6:44097305-44097346	-0.0801515	0.057969	-0.0764037	0.054028	0.0037478	-0.003941
chr6:46925598-46925639	0.0555843	0.079956	0.0638027	0.079956	0.0082184	0
chr6:47360661-47360702	-0.286354	0.06791	-0.271455	0.06791	0.014899	0
chr6:47638956-47638997	0.0423806	0.10094	0.0423806	0.10094	0	0
chr6:52304874-52304915	-0.767371	0.04748	-0.6208	0.04748	0.146571	0
chr6:52414744-52414785	-0.0237743	0.064866	-0.0237743	0.064866	0	0
chr6:53342632-53342673	0.174599	0.078662	0.111896	0.072668	-0.062703	-0.005994
chr6:70616311-70616352	0.297982	0.081939	0.341542	0.081939	0.04356	0
chr6:70616311-70616352	0.297982	0.081939	0.28987	0.081939	-0.008112	0
chr6:109241366-109241407	-0.302866	0.060305	-0.152903	0.060305	0.149963	0
chr6:109241366-109241407	-0.302866	0.060305	-0.382874	0.060305	-0.080008	0
chr6:110391768-110391809	-0.206174	0.064489	-0.123582	0.064489	0.082592	0
chr6:110396270-110396311	-0.148281	0.051238	-0.0919871	0.053922	0.0562939	0.002684
chr6:110396270-110396311	-0.148281	0.051238	-0.148281	0.051238	0	0
chr6:116399331-116399372	-0.175596	0.065635	-0.217711	0.065635	-0.042115	0
chr6:116399331-116399372	-0.175596	0.065635	-0.175596	0.065635	0	0
chr6:118894718-118894759	-0.0702328	0.073126	-0.0484206	0.073126	0.0218122	0
chr6:118894718-118894759	-0.0702328	0.073126	-0.0383332	0.073126	0.0318996	0
chr6:135210293-135210334	-0.0411815	0.057969	-0.000219	0.057969	0.0409628	0
chr6:135210293-135210334	-0.0411815	0.057969	-0.0632016	0.057969	-0.0220201	0
chr6:142946363-142946404	-0.197548	0.073126	-0.197548	0.073126	0	0
chr6:142946363-142946404	-0.197548	0.073126	-0.236602	0.073126	-0.039054	0
chr6:145687981-145688022	-0.0256493	0.15134	0.039573	0.15134	0.0652223	0
chr6:145687981-145688022	-0.0256493	0.15134	0.0655124	0.15134	0.0911617	0
chr6:147359203-147359244	-0.212293	0.059259	-0.242209	0.063802	-0.029916	0.004543
chr6:147359203-147359244	-0.212293	0.059259	-0.310462	0.059259	-0.098169	0
chr6:156617545-156617586	-0.0856585	0.054941	-0.0235734	0.047926	0.0620851	-0.007015
chr6:156617545-156617586	-0.0856585	0.054941	-0.0130562	0.047926	0.0726023	-0.007015
chr6:157419135-157419176	-0.16451	0.047926	-0.16451	0.047926	0	0
chr6:157419135-157419176	-0.16451	0.047926	-0.043322	0.047926	0.121188	0
chr6:157671596-157671637	0.000871	0.057981	0.000871	0.057981	0	0
chr7:966917-966958	-0.0224865	0.073126	-0.0709446	0.073126	-0.0484581	0
chr7:2256897-2256938	-0.225924	0.073126	-0.225924	0.073126	0	0
chr7:2256897-2256938	-0.225924	0.073126	-0.126159	0.073126	0.099765	0
chr7:2522548-2522589	-0.099881	0.073126	-0.0907884	0.073126	0.0090926	0
chr6:28828059-28828100	0.0496407	0.10835	0.0151038	0.083283	-0.0345369	-0.025067
chr6:29143978-29144019	-0.140427	0.047944	-0.264148	0.047944	-0.123721	0
chr6:29580292-29580333	-0.322117	0.10094	-0.321991	0.10094	0.000126	0
chr6:29580292-29580333	-0.322117	0.10094	-0.390553	0.10094	-0.068436	0
chr6:29580292-29580333	-0.322117	0.10094	-0.322117	0.10094	0	0
chr6:30018527-30018568	-0.0151354	0.067019	-0.0151354	0.067019	0	0
chr6:30018527-30018568	-0.0151354	0.067019	-0.132756	0.061249	-0.117621	-0.00577
chr6:36864307-36864348	-0.0445314	0.08447	-0.0856365	0.10391	-0.0411051	0.01944
chr6:26408303-26408344	-0.26864	0.064792	-0.26864	0.064792	0	0
chr6:26408303-26408344	-0.26864	0.064792	-0.202407	0.064792	0.066233	0
chr9:25235045-25235086	0.122894	0.061761	-0.0163147	0.073126	-0.139209	0.011365
chr11:90226449-90226490	-0.328237	0.054368	-0.267345	0.04069	0.060892	-0.013678
chr11:90226449-90226490	-0.328237	0.054368	-0.189869	0.069442	0.138368	0.015074
chr1:72359441-72359482	-0.0898347	0.071436	-0.0898347	0.071436	0	0
chr6:31338623-31338664	-0.0718247	0.1094	0.0793753	0.1094	0.1512	0
chr6:27444587-27444628	-0.143562	0.064792	-0.143562	0.064792	0	0
chr6:27444587-27444628	-0.143562	0.064792	-0.0653253	0.064792	0.0782367	0
chr6:32609836-32609877	0.095872	0.10603	0.095872	0.10603	0	0
chr9:17044953-17044994	-0.184526	0.060083	-0.191785	0.049397	-0.007259	-0.010686
chr9:17044953-17044994	-0.184526	0.060083	-0.184526	0.060083	0	0
chr6:65967025-65967066	-0.449109	0.064866	-0.298518	0.064866	0.150591	0
chr6:28139029-28139070	-0.119241	0.08447	0.0162846	0.08447	0.135526	0
chr10:104694894-104694935	-0.229895	0.056989	-0.449009	0.056989	-0.219114	0
chr10:104694894-104694935	-0.229895	0.056989	-0.255057	0.05832	-0.025162	0.001331
chr14:74768107-74768148	-0.217185	0.16459	-0.125588	0.16459	0.091597	0
chr14:74768107-74768148	-0.217185	0.16459	-0.217185	0.16459	0	0
chr5:165057922-165057963	0.211297	0.077129	-0.0270842	0.077129	-0.238381	0
chr5:165057922-165057963	0.211297	0.077129	0.0592677	0.077129	-0.152029	0
chr7:12210732-12210773	-0.106637	0.073126	-0.192931	0.073126	-0.086294	0
chr5:104636636-104636677	-0.0276769	0.054368	-0.0276769	0.054368	0	0
chr5:104636636-104636677	-0.0276769	0.054368	0.0927555	0.051406	0.120432	-0.002962
chr11:88972047-88972088	0.0770776	0.088537	0.102578	0.088537	0.0255004	0
chr6:24275235-24275276	0.33456	0.10157	0.33456	0.10157	0	0
chr2:124218566-124218607	-0.0832553	0.078823	-0.247675	0.064081	-0.16442	-0.014742
chr2:124218566-124218607	-0.0832553	0.078823	-0.0832553	0.078823	0	0
chr18:37558262-37558303	-0.0128205	0.081338	-0.0139193	0.081338	-0.0010988	0
chr18:37558262-37558303	-0.0128205	0.081338	-0.0186688	0.081338	-0.0058483	0
chr14:85574796-85574837	-0.235387	0.067252	-0.235387	0.067252	0	0
chr14:95517618-95517659	0.0887947	0.10094	0.0718445	0.10094	-0.0169502	0
chr15:64743760-64743801	-0.0365091	0.11838	-0.104574	0.11838	-0.0680649	0
chr15:73372362-73372403	-0.129587	0.079012	-0.16767	0.079012	-0.038083	0
chr15:84829394-84829435	-0.375866	0.068359	-0.375866	0.068359	0	0
chr15:95917650-95917691	-0.0990865	0.082031	0.0562185	0.082031	0.155305	0
chr16:1778009-1778050	0.0129645	0.081258	0.0260366	0.081258	0.0130721	0
chr16:1778009-1778050	0.0129645	0.081258	0.0520725	0.07716	0.039108	-0.004098
chr16:4232263-4232304	-0.216404	0.071979	-0.138563	0.071979	0.077841	0
chr16:54564405-54564446	0.382365	0.24888	0.420585	0.24888	0.03822	0
chr16:58550848-58550889	0.195938	0.065635	0.195938	0.065635	0	0
chr16:86151013-86151054	0.0721252	0.093168	0.141918	0.1076	0.0697928	0.014432
chr16:88486770-88486811	-0.201016	0.052728	-0.248419	0.052728	-0.047403	0
chr16:88486770-88486811	-0.201016	0.052728	-0.157995	0.052728	0.043021	0
chr17:4897848-4897889	-0.159136	0.071979	-0.125425	0.071979	0.033711	0
chr17:4897848-4897889	-0.159136	0.071979	-0.159136	0.071979	0	0
chr17:50588683-50588724	0.0277171	0.073126	-0.0367611	0.073126	-0.0644782	0
chr17:63910025-63910066	0.00169005	0.073126	0.119147	0.073126	0.117457	0
chr17:66309995-66310036	0.143611	0.24459	0.0133245	0.10603	-0.130286	-0.13856
chr17:79807906-79807947	0.0557493	0.071173	0.10093	0.071979	0.0451807	0.000806
chr17:79807906-79807947	0.0557493	0.071173	0.0557493	0.071173	0	0
chr18:28759605-28759646	0.2485	0.11998	0.127633	0.082035	-0.120867	-0.037945
chr18:32449158-32449199	0.337752	0.21058	0.218902	0.16703	-0.11885	-0.04355
chr18:34819275-34819316	-0.124914	0.074884	-0.124914	0.074884	0	0
chr18:59471705-59471746	-0.168301	0.055145	-0.168301	0.055145	0	0
chr19:1217541-1217582	-0.0408309	0.073126	-0.0800626	0.073126	-0.0392317	0
chr19:7516338-7516379	0.0486344	0.10093	0.0096805	0.10093	-0.0389539	0
chr19:7516338-7516379	0.0486344	0.10093	0.0188649	0.10093	-0.0297695	0
chr19:18622525-18622566	-0.103508	0.071173	-0.128809	0.059744	-0.025301	-0.011429
chr19:18622525-18622566	-0.103508	0.071173	-0.0931034	0.066469	0.0104046	-0.004704
chr20:4050986-4051027	-0.0307722	0.059817	-0.0307722	0.059817	0	0
chr20:38204104-38204145	-0.0942337	0.088537	-0.112675	0.088537	-0.0184413	0
chr22:23841668-23841709	-0.249074	0.073126	-0.159165	0.073126	0.089909	0
chr22:41458422-41458463	0.269046	0.10603	0.320005	0.10603	0.050959	0
chr1:2212648-2212689	-0.0950287	0.050204	-0.0524644	0.065635	0.0425643	0.015431
chr1:2212648-2212689	-0.0950287	0.050204	-0.0950287	0.050204	0	0
chr1:39188680-39188721	0.138373	0.062602	0.0564845	0.07716	-0.0818885	0.014558
chr1:50754325-50754366	0.117027	0.10157	0.010633	0.10157	-0.106394	0
chr1:112017595-112017636	-0.247588	0.079685	-0.20935	0.066283	0.038238	-0.013402
chr1:155170431-155170472	-0.278528	0.06445	-0.434519	0.06445	-0.155991	0
chr1:155170431-155170472	-0.278528	0.06445	-0.278528	0.06445	0	0
chr1:228263147-228263188	-0.0918	0.066283	-0.0918	0.066283	0	0
chr2:8616033-8616074	-0.0657229	0.060439	-0.0652088	0.060439	0.000514	0
chr2:8616033-8616074	-0.0657229	0.060439	-0.112454	0.060439	-0.0467311	0
chr2:40516023-40516064	-0.0413656	0.1174	-0.0567535	0.1174	-0.0153879	0
chr2:40516023-40516064	-0.0413656	0.1174	-0.144653	0.1174	-0.103287	0
chr2:66529824-66529865	0.111708	0.11019	0.12045	0.10335	0.008742	-0.00684
chr2:102799015-102799056	0.0369542	0.063879	-0.010178	0.063879	-0.0471322	0
chr2:163491227-163491268	-0.194015	0.04609	-0.142214	0.068819	0.051801	0.022729
chr2:178693619-178693660	-0.0362208	0.07716	0.0367208	0.07716	0.0729416	0
chr2:178693619-178693660	-0.0362208	0.07716	-0.0302452	0.07716	0.0059756	0
chr3:38725804-38725845	-0.0751391	0.094481	-0.0751391	0.094481	0	0
chr3:38725804-38725845	-0.0751391	0.094481	-0.0988162	0.055038	-0.0236771	-0.039443
chr3:53736541-53736582	-0.238905	0.094481	-0.122639	0.094481	0.116266	0
chr3:66311762-66311803	0.0160601	0.07716	0.0160601	0.07716	0	0
chr3:69353630-69353671	-0.0556333	0.066283	-0.0602331	0.066283	-0.0045998	0
chr4:60737367-60737408	0.39265	0.081939	0.224826	0.081939	-0.167824	0
chr3:73505751-73505792	-0.945289	0.049968	-0.945289	0.049968	0	0
chr3:73505751-73505792	-0.945289	0.049968	-0.702795	0.049968	0.242494	0
chr3:111924694-111924735	0.137853	0.086519	0.121544	0.083283	-0.016309	-0.003236
chr10:86749311-86749352	-0.864897	0.08447	-0.864897	0.08447	0	0
chr10:114022282-114022323	-0.320742	0.054028	-0.253069	0.054028	0.067673	0
chr10:121589128-121589169	0.0341318	0.079012	0.00592537	0.079012	-0.0282064	0
chr11:30410609-30410650	-0.0072013	0.062119	-0.0075127	0.062119	-0.000311	0
chr11:30410609-30410650	-0.0072013	0.062119	0.0126867	0.062119	0.019888	0
chr11:32351206-32351247	-0.112553	0.082035	-0.112553	0.082035	0	0
chr11:65623826-65623867	-0.0143314	0.10603	-0.0143314	0.10603	0	0
chr11:65623826-65623867	-0.0143314	0.10603	0.0202963	0.10603	0.0346277	0
chr11:111905322-111905363	-0.0694321	0.11998	-0.0743057	0.11998	-0.0048736	0
chr11:111905322-111905363	-0.0694321	0.11998	-0.158319	0.11998	-0.0888869	0
chr11:113795593-113795634	-0.342985	0.060703	-0.254158	0.060703	0.088827	0
chr12:20391407-20391448	0.150669	0.071436	0.107888	0.071436	-0.042781	0
chr12:26153531-26153572	-0.386614	0.035865	-0.386614	0.035865	0	0
chr12:45815717-45815758	-0.0176635	0.046614	-0.0171843	0.046614	0.000479	0
chr12:63889214-63889255	-0.0984328	0.10094	-0.155493	0.10094	-0.0570602	0
chr12:66000864-66000905	0.0782806	0.13286	0.0425222	0.13286	-0.0357584	0
chr12:66000864-66000905	0.0782806	0.13286	0.0782806	0.13286	0	0
chr12:84412499-84412540	0.0527925	0.076626	-0.0322154	0.10835	-0.0850079	0.031724
chr12:104110008-104110049	-0.0936678	0.049968	-0.0833778	0.049968	0.01029	0
chr12:106772324-106772365	-0.148838	0.078505	-0.158295	0.087806	-0.009457	0.009301
chr12:109539068-109539109	-0.854273	0.042135	-0.648948	0.042135	0.205325	0
chr12:117053999-117054040	-0.294536	0.045247	-0.181967	0.045247	0.112569	0
chr13:38686994-38687035	-0.115206	0.048177	-0.0722546	0.048177	0.0429514	0
chr13:102225899-102225940	0.15651	0.16703	0.341581	0.16703	0.185071	0
chr14:21077051-21077092	0.0272891	0.13286	-0.0034439	0.13286	-0.030733	0
chr14:21077051-21077092	0.0272891	0.13286	0.0220815	0.13286	-0.0052076	0
chr14:29281018-29281059	-0.531015	0.071979	-0.454463	0.074664	0.076552	0.002685
chr14:32454110-32454151	-0.0126544	0.069989	0.0689112	0.076626	0.0815656	0.006637
chr14:35401991-35402032	-0.140332	0.07716	-0.169467	0.07716	-0.029135	0
chr14:35401991-35402032	-0.140332	0.07716	-0.175284	0.07716	-0.034952	0
chr14:63990900-63990941	-0.292945	0.073126	-0.292945	0.073126	0	0
chr14:103523535-103523576	-0.0598061	0.073126	-0.0598061	0.073126	0	0
chr16:4273946-4273987	-0.0080023	0.071979	-0.0862826	0.071979	-0.0782804	0
chr17:63915757-63915798	-0.042748	0.069202	0.027624	0.069202	0.070372	0
chr1:21957478-21957519	-0.0405517	0.07716	-0.0405517	0.07716	0	0
chr1:36220117-36220158	0.00507704	0.09888	-0.167426	0.081939	-0.172503	-0.016941
chr1:200302260-200302301	0.0187463	0.052468	-0.0379586	0.052468	-0.0567049	0
chr1:200302260-200302301	0.0187463	0.052468	-0.0102951	0.052468	-0.0290414	0
chr2:42310835-42310876	0.0316462	0.15134	0.0133081	0.15134	-0.0183381	0
chr2:202508287-202508328	0.30258	0.08447	0.264406	0.073126	-0.038174	-0.011344
chr2:216763344-216763385	0.160921	0.074884	0.270551	0.074884	0.10963	0
chr3:158616082-158616123	-0.321122	0.09888	-0.236964	0.09888	0.084158	0
chr4:119148904-119148945	-0.708866	0.071915	-0.304199	0.071915	0.404667	0
chr5:108874583-108874624	-0.182571	0.056078	-0.182571	0.056078	0	0
chr6:133893367-133893408	-0.145855	0.066736	-0.163242	0.066736	-0.017387	0
chr6:133893367-133893408	-0.145855	0.066736	-0.174951	0.066736	-0.029096	0
chr8:102902118-102902159	-0.120509	0.08447	-0.215545	0.081794	-0.095036	-0.002676
chr10:32559014-32559055	-0.0240434	0.073126	-0.0589037	0.073126	-0.0348603	0
chr12:66010824-66010865	-0.0940622	0.058817	-0.0666683	0.079059	0.0273939	0.020242
chr12:66010824-66010865	-0.0940622	0.058817	-0.110167	0.061413	-0.0161048	0.002596
chr14:21074587-21074628	-0.0695577	0.073126	-0.0695577	0.073126	0	0
chr14:21074587-21074628	-0.0695577	0.073126	-0.166751	0.073126	-0.0971933	0
chr16:15740852-15740893	-0.0647537	0.1174	-0.170142	0.1174	-0.105388	0
chr16:86088898-86088939	-0.0825255	0.04457	-0.0825255	0.04457	0	0
chr17:75509071-75509112	0.0462849	0.078639	0.0462849	0.078639	0	0
chr2:47923428-47923469	0.215048	0.10157	0.369155	0.10157	0.154107	0
chr7:37358490-37358531	-0.0139818	0.082031	0.0281129	0.082031	0.0420947	0
chr8:30444929-30444970	-0.0311238	0.081939	-0.0311238	0.081939	0	0
chr8:30444929-30444970	-0.0311238	0.081939	0.126937	0.081939	0.158061	0
chr20:41437457-41437498	-0.389857	0.1174	-0.389857	0.1174	0	0
chr1:61429565-61429606	-0.102434	0.15134	-0.0132602	0.15229	0.0891738	0.00095
chr1:168722879-168722920	0.202717	0.10094	0.288723	0.10094	0.086006	0
chr2:186169057-186169098	0.130277	0.09888	0.186364	0.09888	0.056087	0
chr3:123398298-123398339	-0.0149311	0.10603	0.0484012	0.10603	0.0633323	0
chr5:128963566-128963607	-0.0186212	0.1094	-0.0923841	0.1094	-0.0737629	0
chr7:136884649-136884690	-0.1226	0.074664	-0.0837584	0.060148	0.0388416	-0.014516
chr8:21918307-21918348	-0.0909553	0.10094	-0.134611	0.10094	-0.0436557	0
chr9:116552552-116552593	-0.29381	0.051406	-0.210968	0.051406	0.082842	0
chr9:116552552-116552593	-0.29381	0.051406	-0.232184	0.051406	0.061626	0
chr10:13492214-13492255	0.464782	0.24888	0.47768	0.24888	0.012898	0
chr10:13492214-13492255	0.464782	0.24888	0.455939	0.24888	-0.008843	0
chr2:67852059-67852100	-0.137048	0.08447	-0.106121	0.08447	0.030927	0
chr16:67424328-67424369	-0.200969	0.042066	-0.200969	0.042066	0	0
chr16:67424328-67424369	-0.200969	0.042066	-0.288819	0.042066	-0.08785	0
chr16:69708464-69708505	0.0925024	0.071979	0.0915636	0.071979	-0.000939	0
chr16:69708464-69708505	0.0925024	0.071979	0.129002	0.10335	0.0364996	0.031371
chr16:81837344-81837385	-0.235079	0.043736	-0.156371	0.064081	0.078708	0.020345
chr16:81837344-81837385	-0.235079	0.043736	-0.224346	0.050002	0.010733	0.006266
chr16:81855997-81856038	0.0866736	0.071979	0.142491	0.071979	0.0558174	0
chr16:81937778-81937819	-0.0278817	0.07716	-0.0828492	0.07716	-0.0549675	0
chr16:81937778-81937819	-0.0278817	0.07716	-0.032052	0.07716	-0.0041703	0
chr16:84548197-84548238	-0.121624	0.050002	-0.246129	0.050002	-0.124505	0
chr16:85382000-85382041	0.0976646	0.10603	0.00411018	0.062602	-0.0935544	-0.043428
chr16:85382000-85382041	0.0976646	0.10603	0.0304554	0.062602	-0.0672092	-0.043428
chr16:85404002-85404043	-0.077988	0.073126	-0.077988	0.073126	0	0
chr16:85672791-85672832	0.0798091	0.17246	0.0798091	0.17246	0	0
chr16:88948443-88948484	-0.0030416	0.069989	-0.0359404	0.069989	-0.0328988	0
chr16:88948443-88948484	-0.0030416	0.069989	-0.0239969	0.069989	-0.0209553	0
chr16:89258756-89258797	0.106412	0.17246	0.157122	0.11456	0.05071	-0.0579
chr17:1383429-1383470	-0.210159	0.10603	-0.152381	0.10603	0.057778	0
chr17:1490473-1490514	-0.239262	0.080149	-0.176178	0.080149	0.063084	0
chr17:1631740-1631781	0.0880017	0.1094	0.125407	0.1094	0.0374053	0
chr17:2649838-2649879	-0.170979	0.079012	-0.170979	0.079012	0	0
chr17:3915306-3915347	-0.245809	0.04303	-0.245809	0.04303	0	0
chr17:4932312-4932353	-0.111335	0.059259	-0.0692417	0.050002	0.0420933	-0.009257
chr17:4933066-4933107	0.0181413	0.063879	0.0109499	0.04949	-0.0071914	-0.014389
chr17:4933066-4933107	0.0181413	0.063879	0.00190265	0.04949	-0.0162387	-0.014389
chr17:4933880-4933921	-0.147962	0.071979	-0.0836367	0.071979	0.0643253	0
chr17:4945952-4945993	-0.283756	0.073126	-0.276657	0.073126	0.007099	0
chr17:5359434-5359475	-0.180461	0.11998	-0.0583662	0.11998	0.122095	0
chr17:5391403-5391444	-0.247091	0.075272	-0.178218	0.075272	0.068873	0
chr17:7007649-7007690	0.269236	0.073126	0.0933317	0.07716	-0.175904	0.004034
chr17:7491002-7491043	-0.0934815	0.066283	-0.115004	0.059259	-0.0215225	-0.007024
chr17:7491002-7491043	-0.0934815	0.066283	-0.132613	0.055038	-0.0391315	-0.011245
chr15:52375233-52375274	-0.0601238	0.07355	-0.0798519	0.07355	-0.0197281	0
chr15:57006743-57006784	-0.638828	0.058817	-0.607376	0.058817	0.031452	0
chr15:63049777-63049818	0.167606	0.1498	0.226529	0.1498	0.058923	0
chr15:63049777-63049818	0.167606	0.1498	0.120106	0.1498	-0.0475	0
chr15:63071271-63071312	0.1175	0.11838	-0.0430396	0.063879	-0.16054	-0.054501
chr15:64889061-64889102	-0.0668031	0.07635	-0.0618434	0.07635	0.0049597	0
chr15:64889061-64889102	-0.0668031	0.07635	-0.0424293	0.07635	0.0243738	0
chr15:66317323-66317364	-1.02655	0.04081	-1.02655	0.04081	0	0
chr15:75407162-75407203	-0.0775954	0.1094	-0.0775954	0.1094	0	0
chr15:89068306-89068347	-0.362153	0.067202	-0.310061	0.063879	0.052092	-0.003323
chr15:90000791-90000832	-0.0084932	0.071979	-0.0084932	0.071979	0	0
chr15:90035290-90035331	0.078285	0.063879	-0.0261219	0.063879	-0.104407	0
chr15:90035290-90035331	0.078285	0.063879	0.078285	0.063879	0	0
chr15:90969017-90969058	-0.143045	0.1174	-0.078676	0.1174	0.064369	0
chr15:90969017-90969058	-0.143045	0.1174	-0.135398	0.1174	0.007647	0
chr16:477465-477506	-0.132812	0.073126	-0.214122	0.055093	-0.08131	-0.018033
chr16:477465-477506	-0.132812	0.073126	-0.135165	0.071979	-0.002353	-0.001147
chr16:4289663-4289704	-0.748407	0.059259	-0.935021	0.059259	-0.186614	0
chr16:4852017-4852058	0.11919	0.10094	0.11919	0.10094	0	0
chr16:4974020-4974061	0.0249063	0.099993	0.0249063	0.099993	0	0
chr16:4974020-4974061	0.0249063	0.099993	-0.0872593	0.099993	-0.112166	0
chr16:8947617-8947658	-0.120463	0.10094	-0.317599	0.10094	-0.197136	0
chr16:15722269-15722310	0.286324	0.1094	0.0467857	0.082031	-0.239538	-0.027369
chr16:24749705-24749746	-0.242375	0.081794	-0.265729	0.064489	-0.023354	-0.017305
chr16:24749705-24749746	-0.242375	0.081794	-0.242375	0.081794	0	0
chr16:28494319-28494360	0.0279059	0.12214	0.0279059	0.12214	0	0
chr16:28494319-28494360	0.0279059	0.12214	0.0955851	0.12214	0.0676792	0
chr16:29809139-29809180	-0.148332	0.052468	-0.110454	0.052468	0.037878	0
chr16:29809139-29809180	-0.148332	0.052468	-0.148332	0.052468	0	0
chr16:30091819-30091860	-0.211767	0.071979	-0.133994	0.050002	0.077773	-0.021977
chr16:30091819-30091860	-0.211767	0.071979	-0.211767	0.071979	0	0
chr16:30689517-30689558	0.0644612	0.10074	-0.028478	0.10074	-0.0929392	0
chr16:53072291-53072332	-0.794736	0.050075	-0.69691	0.052992	0.097826	0.002917
chr16:53072291-53072332	-0.794736	0.050075	-0.69701	0.050075	0.097726	0
chr16:53206354-53206395	-0.836048	0.071979	-0.836048	0.071979	0	0
chr18:3441149-3441190	-0.262576	0.057969	-0.240972	0.057969	0.021604	0
chr18:3608668-3608709	0.134906	0.14744	0.21331	0.14744	0.078404	0
chr18:3652488-3652529	-0.1909	0.11456	-0.331036	0.11456	-0.140136	0
chr18:12882340-12882381	-0.122555	0.24888	-0.122555	0.24888	0	0
chr18:44460394-44460435	0.354194	0.17246	0.354194	0.17246	0	0
chr18:45723104-45723145	0.0192686	0.20852	0.0311423	0.20852	0.0118737	0
chr18:45723104-45723145	0.0192686	0.20852	-0.000256	0.20852	-0.019525	0
chr18:46262049-46262090	0.0934909	0.099993	0.132343	0.099993	0.0388521	0
chr18:46265898-46265939	-0.108113	0.045829	-0.108113	0.045829	0	0
chr18:46265898-46265939	-0.108113	0.045829	-0.145511	0.045829	-0.037398	0
chr18:63253601-63253642	-0.0675351	0.080149	-0.0334182	0.080149	0.0341169	0
chr18:63253601-63253642	-0.0675351	0.080149	-0.0675351	0.080149	0	0
chr2:173345074-173345115	-0.206328	0.072668	-0.20096	0.072668	0.005368	0
chr2:173354387-173354428	0.00830834	0.082035	0.00830834	0.082035	0	0
chr2:173354387-173354428	0.00830834	0.082035	-0.0477127	0.082035	-0.056021	0
chr2:173999133-173999174	0.283273	0.18127	0.283273	0.18127	0	0
chr2:181447525-181447566	0.050098	0.064489	0.050098	0.064489	0	0
chr2:196141900-196141941	-0.708682	0.054028	-0.708682	0.054028	0	0
chr2:197343180-197343221	-0.853414	0.074784	-0.853414	0.074784	0	0
chr2:200829934-200829975	0.192658	0.061761	0.167193	0.071979	-0.025465	0.010218
chr2:203226735-203226776	-0.631358	0.059817	-0.734444	0.059817	-0.103086	0
chr2:206220077-206220118	-0.0749258	0.073126	0.0272336	0.073126	0.102159	0
chr2:219191487-219191528	-0.728272	0.059259	-0.814271	0.05614	-0.085999	-0.003119
chr2:223102231-223102272	0.000122	0.073126	0.000122	0.073126	0	0
chr2:226235118-226235159	0.335958	0.11856	0.349739	0.11856	0.013781	0
chr2:226235118-226235159	0.335958	0.11856	0.335958	0.11856	0	0
chr2:226426995-226427036	-0.370599	0.10094	-0.30347	0.10094	0.067129	0
chr2:226426995-226427036	-0.370599	0.10094	-0.370599	0.10094	0	0
chr2:230877976-230878017	-0.262955	0.085835	-0.130773	0.085835	0.132182	0
chr2:235456686-235456727	-0.0180252	0.15747	0.0499472	0.15747	0.0679724	0
chr2:240571466-240571507	-0.0966244	0.06445	-0.146167	0.059259	-0.0495426	-0.005191
chr2:240571466-240571507	-0.0966244	0.06445	-0.0416267	0.059259	0.0549977	-0.005191
chr2:241302271-241302312	0.619297	0.081939	0.608708	0.081939	-0.010589	0
chr3:12227746-12227787	-0.0782519	0.087265	-0.0422758	0.087265	0.0359761	0
chr3:12227746-12227787	-0.0782519	0.087265	-0.0370799	0.087265	0.041172	0
chr3:16857330-16857371	0.124484	0.082035	0.124285	0.082035	-0.000199	0
chr3:16888074-16888115	-0.089057	0.077964	-0.0641797	0.077964	0.0248773	0
chr3:16929426-16929467	-0.0086734	0.12707	-0.0877964	0.12707	-0.079123	0
chr3:16929426-16929467	-0.0086734	0.12707	-0.0376033	0.12707	-0.0289299	0
chr3:17056887-17056928	-0.0818908	0.074784	-0.0951205	0.16512	-0.0132297	0.090336
chr3:20064161-20064202	-0.379965	0.10603	-0.438932	0.091992	-0.058967	-0.014038
chr3:24306289-24306330	0.143766	0.086519	0.143766	0.086519	0	0
chr3:24306289-24306330	0.143766	0.086519	0.0154546	0.086519	-0.128311	0
chr3:25504799-25504840	0.197409	0.1174	0.133821	0.1174	-0.063588	0
chr3:38165528-38165569	-0.191017	0.073126	-0.210913	0.073126	-0.019896	0
chr3:49664530-49664571	-0.160959	0.064792	-0.178231	0.064792	-0.017272	0
chr3:49932857-49932898	-0.456812	0.073126	-0.353197	0.045829	0.103615	-0.027297
chr3:67375519-67375560	-0.170774	0.082031	-0.165719	0.082031	0.005055	0
chr3:71207138-71207179	-0.0375036	0.073126	-0.0548892	0.073126	-0.0173856	0
chr3:88002431-88002472	0.653493	0.081939	0.554013	0.081939	-0.09948	0
chr3:121626227-121626268	0.181878	0.1094	0.192308	0.1094	0.01043	0
chr3:122374703-122374744	-0.063395	0.081338	-0.204494	0.081338	-0.141099	0
chr3:123386776-123386817	0.0336086	0.073126	0.0718689	0.073126	0.0382603	0
chr3:125202834-125202875	0.131872	0.071979	0.0666963	0.071979	-0.0651757	0
chr3:128592541-128592582	0.091135	0.05862	0.0640927	0.05862	-0.0270423	0
chr3:128603754-128603795	-0.0635845	0.073126	-0.0042415	0.087265	0.059343	0.014139
chr3:128603754-128603795	-0.0635845	0.073126	-0.0676051	0.073126	-0.0040206	0
chr3:133757905-133757946	0.0840856	0.078823	-0.0103658	0.078823	-0.0944514	0
chr3:133757905-133757946	0.0840856	0.078823	0.0840856	0.078823	0	0
chr3:138244263-138244304	-0.881091	0.080149	-0.893162	0.080149	-0.012071	0
chr17:46018081-46018122	0.019545	0.057981	-0.0174157	0.057981	-0.0369607	0
chr17:46135523-46135564	-1.04138	0.040171	-1.04138	0.040171	0	0
chr17:47502752-47502793	0.187981	0.21058	0.14136	0.21058	-0.046621	0
chr17:49346358-49346399	-0.315706	0.045829	-0.336658	0.047944	-0.020952	0.002115
chr17:49711402-49711443	-0.0979529	0.17246	-0.161351	0.17246	-0.0633981	0
chr17:49779527-49779568	-0.211248	0.048064	-0.179816	0.071979	0.031432	0.023915
chr17:49779527-49779568	-0.211248	0.048064	-0.154772	0.048064	0.056476	0
chr17:49779942-49779983	-0.125928	0.10335	-0.125928	0.10335	0	0
chr17:49805794-49805835	-0.127857	0.078823	-0.127857	0.078823	0	0
chr17:55193439-55193480	0.154686	0.1094	0.200107	0.1094	0.045421	0
chr17:59887919-59887960	-0.730833	0.1094	-0.730833	0.1094	0	0
chr17:61652637-61652678	0.0109146	0.055093	0.0109146	0.055093	0	0
chr17:73219648-73219689	-1.0468	0.10157	-1.12383	0.10157	-0.07703	0
chr17:76387007-76387048	-0.109408	0.065635	-0.109408	0.065635	0	0
chr17:76461960-76462001	-0.0107486	0.071979	0.0269073	0.071979	0.0376559	0
chr17:78125217-78125258	-0.172807	0.057981	-0.172807	0.057981	0	0
chr17:78187132-78187173	-0.0080476	0.078505	0.0312297	0.078505	0.0392773	0
chr17:78187132-78187173	-0.0080476	0.078505	-0.005924	0.078505	0.00212364	0
chr17:78395552-78395593	-0.128453	0.065635	-0.128453	0.065635	0	0
chr17:78395552-78395593	-0.128453	0.065635	-0.181306	0.065635	-0.052853	0
chr17:80018285-80018326	-0.710635	0.067202	-0.847272	0.067202	-0.136637	0
chr17:80138058-80138099	-0.0598725	0.10335	-0.169003	0.10335	-0.109131	0
chr17:81558614-81558655	0.281999	0.24673	0.317838	0.24673	0.035839	0
chr17:81558614-81558655	0.281999	0.24673	0.218031	0.24673	-0.063968	0
chr17:82520981-82521022	0.110774	0.15747	0.110774	0.15747	0	0
chr17:82520981-82521022	0.110774	0.15747	0.0541419	0.063802	-0.0566321	-0.093668
chr18:660422-660463	-0.151524	0.058817	-0.151524	0.058817	0	0
chr18:2987020-2987061	-0.172662	0.078123	-0.321922	0.078123	-0.14926	0
chr2:45045653-45045694	0.0438405	0.12069	0.059678	0.12069	0.0158375	0
chr2:176247071-176247112	-0.152277	0.09888	-0.0523949	0.09888	0.0998821	0
chr2:176247071-176247112	-0.152277	0.09888	-0.152277	0.09888	0	0
chr2:222207280-222207321	0.108773	0.10093	0.196405	0.10093	0.087632	0
chr3:54690513-54690554	0.34825	0.21058	0.344026	0.21058	-0.004224	0
chr4:121076929-121076970	0.18323	0.12214	-0.0410598	0.10335	-0.22429	-0.01879
chr17:71146467-71146508	0.241625	0.1174	0.157112	0.1174	-0.084513	0
chr1:243451383-243451424	-0.219734	0.035393	-0.223077	0.04081	-0.003343	0.005417
chr14:64743171-64743212	-0.0327239	0.07716	-0.0479943	0.071979	-0.0152704	-0.005181
chr14:64761331-64761372	-0.160496	0.059259	-0.12722	0.047696	0.033276	-0.011563
chr14:64777857-64777898	-0.0942359	0.09888	-0.0426425	0.09888	0.0515934	0
chr14:64783077-64783118	-0.0718099	0.050002	-0.0718099	0.050002	0	0
chr14:64799795-64799836	-0.040353	0.071979	-0.040353	0.071979	0	0
chr14:64816104-64816145	-0.151509	0.068819	-0.0665917	0.073126	0.0849173	0.004307
chr14:64835054-64835095	-0.187043	0.093489	-0.187043	0.093489	0	0
chr14:64883233-64883274	0.172303	0.10619	0.146012	0.10619	-0.026291	0
chr14:64935770-64935811	-0.713296	0.040171	-0.713296	0.040171	0	0
chr3:157080923-157080964	-0.0942056	0.086519	0.00392811	0.10093	0.0981337	0.014411
chr3:157080923-157080964	-0.0942056	0.086519	-0.146296	0.086519	-0.0520904	0
chr6:53654787-53654828	0.154674	0.10603	0.0715867	0.10603	-0.0830873	0
chr7:127375009-127375050	0.0794531	0.12153	0.0966074	0.12153	0.0171543	0
chr7:127375009-127375050	0.0794531	0.12153	0.0794531	0.12153	0	0
chr7:128225743-128225784	-0.0598061	0.071979	-0.0436781	0.043055	0.016128	-0.028924
chr7:128254519-128254560	-0.266352	0.07716	-0.298116	0.061102	-0.031764	-0.016058
chr7:130782075-130782116	-0.117551	0.060703	-0.130665	0.060703	-0.013114	0
chr7:130782075-130782116	-0.117551	0.060703	-0.0776592	0.060703	0.0398918	0
chr19:8698572-8698613	-0.0514316	0.073126	-0.0514316	0.073126	0	0
chr2:164672346-164672387	-0.182973	0.082035	-0.124735	0.08447	0.058238	0.002435
chr2:164672346-164672387	-0.182973	0.082035	-0.198909	0.082035	-0.015936	0
chr16:53775315-53775356	0.0764812	0.1094	0.0804236	0.1094	0.0039424	0
chr16:53775315-53775356	0.0764812	0.1094	0.182523	0.1094	0.106042	0
chr16:53775315-53775356	0.0764812	0.1094	0.0764812	0.1094	0	0
chr12:132089466-132089507	0.149661	0.1094	0.176099	0.1094	0.026438	0
chr13:24303284-24303325	-0.0975034	0.073126	-0.0906596	0.073126	0.0068438	0
chr13:32804627-32804668	-0.183072	0.060305	-0.142657	0.060703	0.040415	0.000398
chr13:40579428-40579469	0.0603972	0.069202	0.0836236	0.069202	0.0232264	0
chr13:41007510-41007551	-0.0922981	0.078123	-0.0032956	0.078123	0.0890025	0
chr13:49470825-49470866	-0.123657	0.10157	-0.170991	0.10157	-0.047334	0
chr13:50909028-50909069	-1.00671	0.040506	-0.813371	0.040506	0.193339	0
chr13:51946279-51946320	0.0186492	0.081338	-0.0077214	0.081338	-0.0263706	0
chr13:72859967-72860008	-0.242997	0.06791	-0.242997	0.073645	0	0.005735
chr13:72859967-72860008	-0.242997	0.06791	-0.284829	0.073645	-0.041832	0.005735
chr13:75505646-75505687	0.0493374	0.07716	0.178598	0.11838	0.129261	0.04122
chr13:112698582-112698623	0.0504813	0.068177	0.0504813	0.068177	0	0
chr13:112698582-112698623	0.0504813	0.068177	-0.205801	0.051238	-0.256282	-0.016939
chr13:113237025-113237066	-0.0490083	0.09888	-0.0635955	0.09888	-0.0145872	0
chr13:113237025-113237066	-0.0490083	0.09888	-0.0089046	0.09888	0.0401037	0
chr13:113595472-113595513	-0.0537807	0.061761	-0.0638053	0.063879	-0.0100246	0.002118
chr13:113841031-113841072	-0.0806766	0.066283	-0.0806766	0.066283	0	0
chr13:113841031-113841072	-0.0806766	0.066283	-0.0504964	0.066283	0.0301802	0
chr14:23022055-23022096	0.013485	0.088537	-0.0638602	0.088537	-0.0773452	0
chr14:30726644-30726685	0.00791137	0.081939	0.0772354	0.081939	0.069324	0
chr14:34789925-34789966	-0.243473	0.071436	-0.243473	0.071436	0	0
chr14:34789925-34789966	-0.243473	0.071436	-0.169081	0.071436	0.074392	0
chr14:37154450-37154491	-0.243875	0.068188	-0.243875	0.068188	0	0
chr14:54973020-54973061	0.133113	0.073049	0.133113	0.073049	0	0
chr14:58299162-58299203	-0.162487	0.073126	-0.151657	0.073126	0.01083	0
chr14:67995095-67995136	0.105572	0.081939	0.15013	0.081939	0.044558	0
chr14:68794425-68794466	-0.0722602	0.094481	-0.121621	0.094481	-0.0493608	0
chr14:69666795-69666836	-0.554445	0.075947	-0.687184	0.075947	-0.132739	0
chr14:72927394-72927435	-0.0681042	0.074034	-0.012416	0.068177	0.0556882	-0.005857
chr14:102525791-102525832	-0.447081	0.049334	-0.423355	0.049334	0.023726	0
chr15:31319818-31319859	0.0316589	0.07716	0.0316589	0.07716	0	0
chr4:80263167-80263208	-0.0644766	0.064792	-0.112054	0.064792	-0.0475774	0
chr4:80263167-80263208	-0.0644766	0.064792	-0.0147975	0.068819	0.0496791	0.004027
chr2:237310836-237310877	0.0426505	0.10603	0.0426505	0.10603	0	0
chr3:124731214-124731255	-0.113076	0.07716	-0.161336	0.071979	-0.04826	-0.005181
chr3:124731214-124731255	-0.113076	0.07716	-0.113076	0.07716	0	0
chr3:136206329-136206370	-0.204008	0.081338	-0.0511421	0.081338	0.152866	0
chr3:136206329-136206370	-0.204008	0.081338	0.0126451	0.081338	0.216653	0
chr3:138374027-138374068	0.0655768	0.078505	0.0640383	0.087806	-0.0015385	0.009301
chr1:37995627-37995668	0.0151063	0.07716	0.0223092	0.07716	0.0072029	0
chr1:37995627-37995668	0.0151063	0.07716	0.0135671	0.07716	-0.0015392	0
chr1:55023849-55023890	-0.262729	0.03352	-0.285748	0.036736	-0.023019	0.003216
chr1:55023849-55023890	-0.262729	0.03352	-0.302493	0.036736	-0.039764	0.003216
chr1:109274948-109274989	-0.12185	0.10094	-0.130043	0.10094	-0.008193	0
chr1:109274948-109274989	-0.12185	0.10094	-0.12185	0.10094	0	0
chr1:113905747-113905788	0.00338272	0.060744	0.00338272	0.060744	0	0
chr1:113905747-113905788	0.00338272	0.060744	-0.0376713	0.05493	-0.041054	-0.005814
chr1:151795552-151795593	0.0791033	0.11856	0.106827	0.11856	0.0277237	0
chr1:154449571-154449612	-0.109131	0.061249	-0.0614366	0.052421	0.0476944	-0.008828
chr4:81665876-81665917	-0.160039	0.081794	-0.160039	0.081794	0	0
chr4:119979107-119979148	0.0669775	0.075809	0.0669775	0.075809	0	0
chr4:147486480-147486521	0.108174	0.062598	0.164777	0.12707	0.056603	0.064472
chr4:155716901-155716942	-0.0877442	0.079059	-0.0538125	0.069989	0.0339317	-0.00907
chr1:222656188-222656229	0.618809	0.10335	0.464823	0.10335	-0.153986	0
chr1:230715662-230715703	-0.252849	0.044989	-0.20388	0.044989	0.048969	0
chr2:19742692-19742733	-0.131408	0.057628	-0.131408	0.057628	0	0
chr2:21310215-21310256	-0.533392	0.072668	-0.456656	0.074884	0.076736	0.002216
chr2:43854468-43854509	-0.195041	0.066283	-0.0869134	0.066283	0.108128	0
chr2:45669278-45669319	-0.0726665	0.057683	-0.100351	0.057683	-0.0276845	0
chr2:162254006-162254047	-0.159239	0.071436	-0.175698	0.071436	-0.016459	0
chr2:162254006-162254047	-0.159239	0.071436	-0.124115	0.071436	0.035124	0
chr2:202943789-202943830	-0.52468	0.071979	-0.506009	0.057981	0.018671	-0.013998
chr2:202943789-202943830	-0.52468	0.071979	-0.505508	0.071979	0.019172	0
chr2:215435739-215435780	-0.0860011	0.059259	-0.0336022	0.059259	0.0523989	0
chr2:215435739-215435780	-0.0860011	0.059259	-0.0735876	0.059259	0.0124135	0
chr2:217815786-217815827	-0.148441	0.057981	-0.148441	0.057981	0	0
chr2:217815786-217815827	-0.148441	0.057981	-0.0936516	0.059259	0.0547894	0.001278
chr3:157135134-157135175	-0.125078	0.064792	-0.178699	0.064792	-0.053621	0
chr3:172398092-172398133	0.167166	0.089981	0.1174	0.089981	-0.049766	0
chr4:56913381-56913422	-0.191735	0.065863	-0.181683	0.065863	0.010052	0
chr11:65638109-65638150	-0.0191627	0.071979	-0.0508311	0.071979	-0.0316684	0
chr11:65638109-65638150	-0.0191627	0.071979	-0.0776231	0.073126	-0.0584604	0.001147
chr11:103799701-103799742	-0.407421	0.078639	-0.261728	0.078639	0.145693	0
chr11:110373616-110373657	0.0914511	0.12153	0.0538344	0.12153	-0.0376167	0
chr11:110373616-110373657	0.0914511	0.12153	0.10578	0.1909	0.0143289	0.06937
chr12:111730185-111730226	-0.0582377	0.079956	0.016145	0.1174	0.0743827	0.037444
chr12:111730185-111730226	-0.0582377	0.079956	-0.0422965	0.079956	0.0159412	0
chr13:110301870-110301911	0.0816392	0.16703	0.128918	0.16703	0.0472788	0
chr15:90885386-90885427	0.0221534	0.078639	0.044692	0.078639	0.0225386	0
chr15:90885386-90885427	0.0221534	0.078639	0.0767108	0.078639	0.0545574	0
chr16:75272484-75272525	-0.0798837	0.057981	-0.0798837	0.057981	0	0
chr17:61154984-61155025	-0.61034	0.056669	-0.61034	0.056669	0	0
chr7:19013090-19013131	-0.0689617	0.10335	-0.0785994	0.10335	-0.0096377	0
chr17:80385125-80385166	-0.122017	0.062119	-0.122017	0.062119	0	0
chr18:22429708-22429749	-0.244451	0.041188	-0.244451	0.041188	0	0
chr19:11143191-11143232	-0.0277033	0.07716	0.00991474	0.07716	0.037618	0
chr19:11143191-11143232	-0.0277033	0.07716	-0.0277033	0.07716	0	0
chr19:44921901-44921942	-0.0443891	0.078639	-0.0769503	0.078639	-0.0325612	0
chr19:44921901-44921942	-0.0443891	0.078639	-0.0787856	0.078639	-0.0343965	0
chr1:55039911-55039952	-0.0744071	0.073126	-0.0714621	0.073126	0.002945	0
chr6:32187784-32187825	-0.0806528	0.067801	-0.0989807	0.067801	-0.0183279	0
chr6:32187784-32187825	-0.0806528	0.067801	-0.13666	0.067801	-0.0560072	0
chr6:160596311-160596352	-0.10222	0.079685	-0.14321	0.079685	-0.04099	0
chr6:160596311-160596352	-0.10222	0.079685	-0.141929	0.079685	-0.039709	0
chr12:110958425-110958466	-0.0368317	0.049632	0.0127156	0.057969	0.0495473	0.008337
chr13:110397256-110397297	-0.053647	0.058817	-0.0275306	0.059817	0.0261164	0.001
chr13:110397256-110397297	-0.053647	0.058817	0.0843968	0.078123	0.138044	0.019306
chr13:110397256-110397297	-0.053647	0.058817	-0.053647	0.058817	0	0
chr1:201903116-201903157	-0.0777928	0.073126	-0.0214236	0.073126	0.0563692	0
chr1:218654493-218654534	-0.0406181	0.17246	0.10465	0.17246	0.145268	0
chr1:55043892-55043933	-0.0107675	0.071979	0.00682399	0.1094	0.0175915	0.037421
chr1:222649637-222649678	-0.216685	0.051191	-0.130829	0.051191	0.085856	0
chr2:21019839-21019880	0.0773968	0.06445	-0.020931	0.06445	-0.0983278	0
chr2:164071176-164071217	-0.0799432	0.067202	-0.0741092	0.067202	0.005834	0
chr12:89615162-89615203	-0.0730839	0.047696	-0.0295411	0.065348	0.0435428	0.017652
chr12:89615162-89615203	-0.0730839	0.047696	-0.0792111	0.047696	-0.0061272	0
chr12:89615162-89615203	-0.0730839	0.047696	-0.0037805	0.047696	0.0693034	0
chr4:56899545-56899586	0.0350962	0.074884	-0.0050308	0.066198	-0.040127	-0.008686
chr6:12903705-12903746	0.261422	0.082035	0.584909	0.11242	0.323487	0.030385
chr6:12903705-12903746	0.261422	0.082035	0.261422	0.082035	0	0
chr6:73706125-73706166	-0.103796	0.17246	-0.28454	0.080149	-0.180744	-0.092311
chr6:133888679-133888720	0.0138321	0.069442	-0.0448816	0.069442	-0.0587137	0
chr6:133888679-133888720	0.0138321	0.069442	0.0919175	0.069442	0.0780854	0
chr6:160580376-160580417	-0.252835	0.078823	-0.211356	0.078823	0.041479	0
chr9:22092905-22092946	0.0735929	0.080149	0.105543	0.082035	0.0319501	0.001886
chr9:104823937-104823978	0.0210619	0.075947	0.0510258	0.075947	0.0299639	0
chr10:89243027-89243068	-0.0776286	0.054368	-0.121647	0.057099	-0.0440184	0.002731
chr10:103069692-103069733	-0.119486	0.065635	-0.0799971	0.065635	0.0394889	0
chr1:36482315-36482356	-0.0907787	0.071979	-0.0439735	0.071979	0.0468052	0
chr1:38826016-38826057	-0.0038406	0.10835	0.0229616	0.10835	0.0268022	0
chr1:40890085-40890126	0.0953668	0.21648	-0.0580406	0.21648	-0.153407	0
chr1:41770105-41770146	-0.721732	0.073126	-0.620471	0.073126	0.101261	0
chr1:42958360-42958401	-0.142186	0.073126	-0.132093	0.073126	0.010093	0
chr1:46110851-46110892	-0.94148	0.07811	-1.00224	0.07811	-0.06076	0
chr1:56152219-56152260	-0.422921	0.073126	-0.422921	0.073126	0	0
chr1:56440582-56440623	-0.104067	0.07716	-0.0531167	0.073126	0.0509503	-0.004034
chr1:56440582-56440623	-0.104067	0.07716	-0.152925	0.073126	-0.048858	-0.004034
chr1:65440787-65440828	0.123902	0.12214	0.0662601	0.12214	-0.0576419	0
chr1:65604078-65604119	-0.168639	0.075069	0.0539562	0.13283	0.222595	0.057761
chr1:65604078-65604119	-0.168639	0.075069	-0.278515	0.075069	-0.109876	0
chr1:65671486-65671527	-0.31479	0.064792	-0.31479	0.064792	0	0
chr1:78946263-78946304	0.0753662	0.069073	0.0753662	0.088675	0	0.019602
chr1:92962410-92962451	-0.141441	0.061249	-0.107462	0.071007	0.033979	0.009758
chr1:108199481-108199522	-0.450928	0.049397	-0.277115	0.049397	0.173813	0
chr1:111183571-111183612	-0.149623	0.070779	-0.14218	0.070779	0.007443	0
chr1:113761166-113761207	0.00339283	0.1174	0.00339283	0.1174	0	0
chr1:113761166-113761207	0.00339283	0.1174	-0.015141	0.1174	-0.0185338	0
chr1:117001689-117001730	-0.0175025	0.049397	-0.0712589	0.049397	-0.0537564	0
chr1:150384433-150384474	-0.144536	0.074884	-0.121631	0.074884	0.022905	0
chr1:156117395-156117436	-0.634159	0.073126	-0.649337	0.073126	-0.015178	0
chr1:156117395-156117436	-0.634159	0.073126	-0.643432	0.073126	-0.009273	0
chr1:159204267-159204308	0.0841474	0.09888	0.126771	0.09888	0.0426236	0
chr1:159204873-159204914	0.201165	0.24888	0.0150893	0.079685	-0.186076	-0.169195
chr1:159204873-159204914	0.201165	0.24888	-0.0555833	0.079685	-0.256748	-0.169195
chr1:159204873-159204914	0.201165	0.24888	0.201165	0.24888	0	0
chr1:159205544-159205585	-0.0711364	0.069989	0.0114672	0.069989	0.0826036	0
chr1:159205544-159205585	-0.0711364	0.069989	-0.0711364	0.069989	0	0
chr1:159205684-159205725	-0.0815217	0.057981	-0.0589002	0.057981	0.0226215	0
chr1:159205684-159205725	-0.0815217	0.057981	-0.0815217	0.057981	0	0
chr1:161216493-161216534	-0.0134719	0.087912	-0.0134719	0.087912	0	0
chr1:161216493-161216534	-0.0134719	0.087912	-0.0417256	0.087912	-0.0282537	0
chr5:132371383-132371424	-0.0311096	0.047926	-0.0428153	0.047926	-0.0117057	0
chr5:177409511-177409552	0.00507683	0.059259	0.0392133	0.078606	0.0341365	0.019347
chr5:177409511-177409552	0.00507683	0.059259	-0.0113543	0.074664	-0.0164311	0.015405
chr6:25801835-25801876	-0.174412	0.079012	-0.18357	0.079012	-0.009158	0
chr6:25801835-25801876	-0.174412	0.079012	-0.0948063	0.085835	0.0796057	0.006823
chr6:25835192-25835233	-0.2823	0.050831	-0.323579	0.050831	-0.041279	0
chr6:25835192-25835233	-0.2823	0.050831	-0.2823	0.050831	0	0
chr6:25841784-25841825	-0.157222	0.057981	-0.121022	0.057981	0.0362	0
chr6:25841784-25841825	-0.157222	0.057981	-0.150688	0.057981	0.006534	0
chr6:149807017-149807058	-0.117061	0.074664	-0.114529	0.074664	0.002532	0
chr6:159979095-159979136	-0.24073	0.042066	-0.238746	0.042066	0.001984	0
chr6:160055215-160055256	-0.0144363	0.053521	0.0270394	0.071173	0.0414757	0.017652
chr6:160136102-160136143	-0.0464263	0.081939	-0.0771518	0.081939	-0.0307255	0
chr7:50558021-50558062	-0.144558	0.049397	-0.275459	0.049397	-0.130901	0
chr8:9318522-9318563	-0.106052	0.066469	-0.0988183	0.066469	0.0072337	0
chr8:9326066-9326107	-0.0605066	0.10603	-0.0595999	0.10603	0.000907	0
chr8:9326066-9326107	-0.0605066	0.10603	0.0156256	0.10603	0.0761322	0
chr8:10428280-10428321	-0.223833	0.066283	-0.260143	0.066283	-0.03631	0
chr9:7243969-7244010	0.175733	0.13286	0.124512	0.13286	-0.051221	0
chr10:16451119-16451160	-0.215555	0.051202	-0.141429	0.051202	0.074126	0
chr10:16451119-16451160	-0.215555	0.051202	-0.0900785	0.058817	0.125476	0.007615
chr10:62094628-62094669	0.194064	0.13286	-0.0218479	0.078662	-0.215912	-0.054198
chr10:87658787-87658828	-0.107266	0.057668	-0.0624221	0.057668	0.0448439	0
chr10:95062506-95062547	-0.411862	0.062602	-0.168517	0.062602	0.243345	0
chr10:95144280-95144321	-0.274993	0.079685	-0.32774	0.079685	-0.052747	0
chr10:133371257-133371298	-0.601607	0.079685	-0.732904	0.079685	-0.131297	0
chr10:133371257-133371298	-0.601607	0.079685	-0.601607	0.079685	0	0
chr11:2189408-2189449	-0.341424	0.077964	-0.334903	0.077964	0.006521	0
chr11:2189408-2189449	-0.341424	0.077964	-0.303119	0.077964	0.038305	0
chr11:27125557-27125598	-0.514523	0.23167	-0.514523	0.23167	0	0
chr11:27125557-27125598	-0.514523	0.23167	-0.219489	0.23167	0.295034	0
chr2:70999233-70999274	0.332414	0.061102	0.224219	0.085835	-0.108195	0.024733
chr2:72150235-72150276	-0.172013	0.071979	-0.0670059	0.071979	0.105007	0
chr2:73585739-73585780	0.0377103	0.073126	0.0918445	0.073126	0.0541342	0
chr2:73619620-73619661	-0.136872	0.066283	-0.0715921	0.066283	0.0652799	0
chr2:73619620-73619661	-0.136872	0.066283	-0.156766	0.066283	-0.019894	0
chr2:73628360-73628401	-0.113281	0.051238	-0.0616242	0.051238	0.0516568	0
chr2:73628360-73628401	-0.113281	0.051238	-0.07369	0.064489	0.039591	0.013251
chr2:73631060-73631101	-0.0444623	0.065863	0.0402248	0.065863	0.0846871	0
chr3:36218014-36218055	-0.131686	0.074884	-0.0525395	0.074884	0.0791465	0
chr2:73673697-73673738	0.0443379	0.07716	0.0654142	0.073126	0.0210763	-0.004034
chr2:73696436-73696477	0.373931	0.06445	0.170376	0.06445	-0.203555	0
chr2:73708799-73708840	-0.040276	0.073126	-0.0168895	0.071979	0.0233865	-0.001147
chr2:73708799-73708840	-0.040276	0.073126	-0.0829679	0.063802	-0.0426919	-0.009324
chr2:73729699-73729740	-0.267575	0.063802	-0.318305	0.063802	-0.05073	0
chr2:135950392-135950433	-0.124578	0.094481	-0.124578	0.094481	0	0
chr2:135950392-135950433	-0.124578	0.094481	-0.108653	0.094481	0.015925	0
chr2:210675763-210675804	0.0543013	0.068819	0.0608122	0.068819	0.0065109	0
chr2:210675763-210675804	0.0543013	0.068819	0.0543013	0.068819	0	0
chr3:183092336-183092377	-0.0742182	0.055093	-0.138208	0.055093	-0.0639898	0
chr3:196215190-196215231	-0.0149326	0.063879	-0.0149326	0.063879	0	0
chr3:196215190-196215231	-0.0149326	0.063879	-0.0193817	0.063879	-0.0044491	0
chr4:9983801-9983842	0.0310688	0.079012	0.12286	0.079012	0.0917912	0
chr4:88301655-88301696	-0.311574	0.060086	-0.269648	0.060086	0.041926	0
chr4:88301655-88301696	-0.311574	0.060086	-0.269136	0.060086	0.042438	0
chr4:186242907-186242948	0.182799	0.24459	0.242409	0.24459	0.05961	0
chr5:1181592-1181633	-0.110424	0.073126	-0.102725	0.073126	0.007699	0
chr5:132369746-132369787	-0.077526	0.071979	-0.116583	0.066283	-0.039057	-0.005696
chr5:132369746-132369787	-0.077526	0.071979	-0.077526	0.071979	0	0
chr2:55923709-55923750	-0.0499783	0.073126	-0.0031708	0.073126	0.0468075	0
chr8:9771223-9771264	-0.380834	0.073126	-0.277368	0.073126	0.103466	0
chr15:65063110-65063151	-0.112645	0.075272	-0.106185	0.064081	0.00646	-0.011191
chr22:27491490-27491531	-0.07306	0.094481	-0.07306	0.094481	0	0
chr8:11173943-11173984	-0.0709893	0.11456	-0.0709893	0.11456	0	0
chr8:11173943-11173984	-0.0709893	0.11456	-0.0581414	0.11456	0.0128479	0
chr14:52138105-52138146	-0.0409365	0.066283	-0.126969	0.051191	-0.0860325	-0.015092
chr11:2698425-2698466	0.257186	0.1062	0.257186	0.1062	0	0
chr11:3864261-3864302	-0.118611	0.047788	-0.103445	0.047788	0.015166	0
chr11:5670278-5670319	-0.172986	0.071979	-0.14752	0.071979	0.025466	0
chr11:5672297-5672338	-0.0829973	0.064792	-0.0612279	0.066283	0.0217694	0.001491
chr11:5679824-5679865	-0.193323	0.071979	-0.193323	0.071979	0	0
chr11:5679824-5679865	-0.193323	0.071979	-0.251346	0.071979	-0.058023	0
chr11:5680159-5680200	0.00547904	0.078606	0.0483861	0.078606	0.0429071	0
chr11:5680159-5680200	0.00547904	0.078606	0.0586905	0.078606	0.0532115	0
chr11:5844328-5844369	0.182116	0.1909	0.124888	0.1909	-0.057228	0
chr11:8824536-8824577	-0.148425	0.071436	-0.148425	0.071436	0	0
chr11:10652172-10652213	-0.146388	0.077964	-0.133543	0.07355	0.012845	-0.004414
chr11:10652172-10652213	-0.146388	0.077964	-0.156542	0.07355	-0.010154	-0.004414
chr11:10731418-10731459	-0.0502195	0.10157	-0.140178	0.060086	-0.0899585	-0.041484
chr11:17223519-17223560	-1.0673	0.047944	-1.0673	0.047944	0	0
chr11:48058132-48058173	-0.0389346	0.047944	-0.0279622	0.047944	0.0109724	0
chr11:57617026-57617067	-0.846697	0.040339	-0.824443	0.040339	0.022254	0
chr11:58152350-58152391	-0.163573	0.047672	-0.163573	0.047672	0	0
chr11:61803890-61803931	-0.0092546	0.11838	-0.0092546	0.11838	0	0
chr11:61803890-61803931	-0.0092546	0.11838	-0.0059348	0.11838	0.00331979	0
chr11:61803890-61803931	-0.0092546	0.11838	-0.0167035	0.15747	-0.0074489	0.03909
chr11:61803890-61803931	-0.0092546	0.11838	-0.0024042	0.11838	0.00685042	0
chr11:61850677-61850718	-0.191346	0.073049	0.0817463	0.10157	0.273092	0.028521
chr11:61850677-61850718	-0.191346	0.073049	-0.191346	0.073049	0	0
chr11:61850677-61850718	-0.191346	0.073049	-0.206646	0.073049	-0.0153	0
chr11:64210054-64210095	0.0422587	0.12432	0.0490805	0.11838	0.0068218	-0.00594
chr11:64210054-64210095	0.0422587	0.12432	0.0694502	0.11838	0.0271915	-0.00594
chr11:65626831-65626872	-0.112152	0.048466	-0.088874	0.046548	0.023278	-0.001918
chr11:65626831-65626872	-0.112152	0.048466	-0.0691168	0.046548	0.0430352	-0.001918
chr11:71920059-71920100	-0.246148	0.071979	-0.307613	0.071979	-0.061465	0
chr11:72694385-72694426	-0.0920754	0.073126	-0.0920754	0.073126	0	0
chr11:72729059-72729100	-0.040163	0.085835	-0.0020624	0.085835	0.0381006	0
chr11:73236869-73236910	-0.11602	0.073126	-0.0878908	0.04303	0.0281292	-0.030096
chr11:73236869-73236910	-0.11602	0.073126	-0.0739414	0.071979	0.0420786	-0.001147
chr11:77827883-77827924	-0.0630739	0.068181	-0.0630739	0.08073	0	0.012549
chr12:32513291-32513332	-0.0806889	0.089981	-0.0806889	0.089981	0	0
chr12:32696853-32696894	0.381589	0.1174	0.381589	0.1174	0	0
chr12:40156880-40156921	-0.347524	0.074884	-0.238105	0.074884	0.109419	0
chr12:40156880-40156921	-0.347524	0.074884	-0.347524	0.074884	0	0
chr12:40207986-40208027	-0.0163457	0.057969	-0.0272036	0.057969	-0.0108579	0
chr12:47814565-47814606	0.0553233	0.10119	0.0553233	0.10119	0	0
chr12:47814565-47814606	0.0553233	0.10119	0.00727333	0.10119	-0.04805	0
chr12:47814565-47814606	0.0553233	0.10119	0.0668221	0.10119	0.0114988	0
chr12:47820139-47820180	-0.0136841	0.073126	-0.0304688	0.073126	-0.0167847	0
chr12:49258928-49258969	-0.549039	0.073126	-0.458826	0.066283	0.090213	-0.006843
chr12:49258928-49258969	-0.549039	0.073126	-0.400255	0.066283	0.148784	-0.006843
chr12:51274132-51274173	-0.0944103	0.1174	-0.0085948	0.1174	0.0858155	0
chr12:51326243-51326284	-0.161723	0.11456	-0.0975626	0.11456	0.0641604	0
chr12:54318504-54318545	-0.0931819	0.1174	-0.111091	0.1174	-0.0179091	0
chr12:54318504-54318545	-0.0931819	0.1174	-0.0714815	0.1174	0.0217004	0
chr12:54336068-54336109	-0.176451	0.068181	-0.0183572	0.068181	0.158094	0
chr12:54336068-54336109	-0.176451	0.068181	-0.176451	0.068181	0	0
chr12:56625639-56625680	0.333381	0.077964	0.325429	0.077964	-0.007952	0
chr12:56625639-56625680	0.333381	0.077964	0.340623	0.077964	0.007242	0
chr12:56703251-56703292	0.633086	0.081939	0.563616	0.081939	-0.06947	0
chr12:64611279-64611320	-0.0615429	0.078505	-0.0163189	0.071979	0.045224	-0.006526
chr12:64611279-64611320	-0.0615429	0.078505	-0.0615429	0.078505	0	0
chr12:64622366-64622407	-0.157212	0.060703	-0.157212	0.060703	0	0
chr12:64634303-64634344	-1.06479	0.051406	-0.937404	0.051406	0.127386	0
chr12:64644215-64644256	-0.273228	0.077129	-0.238761	0.077129	0.034467	0
chr12:108873413-108873454	-0.41426	0.057981	-0.461692	0.057981	-0.047432	0
chr12:109582296-109582337	-0.47698	0.053014	-0.47698	0.053014	0	0
chr12:114920353-114920394	-0.216619	0.057981	-0.116649	0.057981	0.09997	0
chr12:114920353-114920394	-0.216619	0.057981	-0.0469544	0.08599	0.169665	0.028009
chr12:117040943-117040984	-0.148219	0.063879	-0.148219	0.063879	0	0
chr12:121748342-121748383	-0.0801879	0.071979	-0.0801879	0.071979	0	0
chr12:121778984-121779025	-0.0404171	0.091992	-0.0093108	0.073126	0.0311063	-0.018866
chr12:121778984-121779025	-0.0404171	0.091992	-0.118386	0.073126	-0.0779689	-0.018866
chr11:86055289-86055330	-0.131145	0.059259	-0.225955	0.059259	-0.09481	0
chr11:95099838-95099879	-0.182591	0.15645	-0.0955077	0.15645	0.0870833	0
chr11:108443615-108443656	0.0118174	0.070615	-0.08753	0.07355	-0.0993474	0.002935
chr11:114082880-114082921	0.156869	0.13286	0.19415	0.13286	0.037281	0
chr11:114082880-114082921	0.156869	0.13286	0.139877	0.13286	-0.016992	0
chr11:114111579-114111620	-0.0862788	0.09888	-0.0258728	0.10093	0.060406	0.00205
chr11:114217296-114217337	0.0510108	0.1094	0.102894	0.1094	0.0518832	0
chr11:114217296-114217337	0.0510108	0.1094	0.0510108	0.1094	0	0
chr11:116964627-116964668	0.317371	0.1174	0.328183	0.1174	0.010812	0
chr11:117302084-117302125	0.519374	0.06445	0.485608	0.06445	-0.033766	0
chr11:117302084-117302125	0.519374	0.06445	0.493589	0.06445	-0.025785	0
chr11:122649830-122649871	0.533743	0.09888	0.350018	0.09888	-0.183725	0
chr11:122649830-122649871	0.533743	0.09888	0.359127	0.09888	-0.174616	0
chr11:125753271-125753312	0.351841	0.073126	0.350472	0.081258	-0.001369	0.008132
chr11:126415386-126415427	-0.0069711	0.061761	0.00250743	0.061761	0.00947853	0
chr11:126415386-126415427	-0.0069711	0.061761	-0.051499	0.061761	-0.0445279	0
chr11:129290413-129290454	-0.096134	0.072614	-0.096134	0.072614	0	0
chr12:630823-630864	-0.121705	0.040506	-0.0907561	0.040506	0.0309489	0
chr12:630823-630864	-0.121705	0.040506	-0.121705	0.040506	0	0
chr12:6019257-6019298	-0.0043869	0.071979	0.0711252	0.071979	0.0755121	0
chr12:6019257-6019298	-0.0043869	0.071979	0.0459407	0.071979	0.0503276	0
chr12:6054952-6054993	0.0100333	0.069989	0.0204351	0.07635	0.0104018	0.006361
chr12:6179881-6179922	0.0170429	0.055145	0.00295301	0.055145	-0.0140899	0
chr12:6182706-6182747	-0.2597	0.050727	-0.241942	0.050727	0.017758	0
chr12:6223652-6223693	-0.0973978	0.07716	-0.0973978	0.07716	0	0
chr12:6223652-6223693	-0.0973978	0.07716	-0.0869301	0.07716	0.0104677	0
chr12:7999548-7999589	0.084229	0.077964	0.0447424	0.077964	-0.0394866	0
chr12:21529285-21529326	-0.114995	0.078606	-0.02098	0.10603	0.094015	0.027424
chr12:27253794-27253835	-0.0742641	0.066283	-0.104667	0.066283	-0.0304029	0
chr12:27253794-27253835	-0.0742641	0.066283	-0.0887115	0.071979	-0.0144474	0.005696
chr12:29278301-29278342	-0.0242966	0.059233	-0.112627	0.059233	-0.0883304	0
chr12:29284264-29284305	-0.154922	0.054986	-0.117371	0.054986	0.037551	0
chr12:29284264-29284305	-0.154922	0.054986	-0.154922	0.054986	0	0
chr1:29090108-29090149	-0.270843	0.09888	-0.214226	0.09888	0.056617	0
chr1:35578678-35578719	-0.145223	0.10335	-0.116707	0.10335	0.028516	0
chr1:37466257-37466298	0.131995	0.086519	0.085854	0.062119	-0.046141	-0.0244
chr1:42961527-42961568	-0.0424895	0.09888	0.0108702	0.09888	0.0533597	0
chr1:42957931-42957972	-0.095848	0.073126	-0.095848	0.073126	0	0
chr1:43612388-43612429	0.0408535	0.083283	0.0806644	0.083283	0.0398109	0
chr1:47213566-47213607	0.0115251	0.12707	-0.0367523	0.12707	-0.0482774	0
chr1:50819769-50819810	0.113027	0.071436	0.179005	0.11998	0.065978	0.048544
chr1:52868106-52868147	-0.687145	0.071979	-0.687145	0.071979	0	0
chr1:62438692-62438733	-0.159877	0.07716	-0.275278	0.07716	-0.115401	0
chr1:63435737-63435778	-0.360182	0.072668	-0.421991	0.072668	-0.061809	0
chr1:77499150-77499191	-0.299697	0.049391	-0.275438	0.049391	0.024259	0
chr1:92839007-92839048	-0.835334	0.10929	-0.857614	0.10929	-0.02228	0
chr1:110368825-110368866	-0.292891	0.069863	-0.292891	0.069863	0	0
chr1:111138769-111138810	-0.674995	0.08073	-0.392316	0.08073	0.282679	0
chr1:114390223-114390264	-0.330325	0.068819	-0.246021	0.071979	0.084304	0.00316
chr1:114390223-114390264	-0.330325	0.068819	-0.340755	0.068819	-0.01043	0
chr1:150905604-150905645	0.0332519	0.1062	0.0332519	0.1062	0	0
chr1:154115762-154115803	-0.0911973	0.055066	-0.133086	0.046614	-0.0418887	-0.008452
chr1:154162949-154162990	-0.614136	0.044167	-0.623088	0.077964	-0.008952	0.033797
chr1:158643504-158643545	0.160467	0.10619	0.212499	0.10619	0.052032	0
chr1:158626628-158626669	-0.132957	0.15134	-0.132957	0.15134	0	0
chr1:158575444-158575485	-0.0637131	0.073842	0.208908	0.11019	0.272621	0.036348
chr1:158604977-158605018	-0.360845	0.068181	-0.360845	0.08073	0	0.012549
chr1:158621174-158621215	-0.327633	0.07811	-0.411525	0.07811	-0.083892	0
chrX:40985472-40985513	-0.139772	0.085835	-0.0424441	0.085835	0.0973279	0
chrX:54870244-54870285	-0.0576362	0.049632	-0.0562721	0.049632	0.0013641	0
chrX:54940594-54940635	-0.132507	0.07811	-0.168066	0.07811	-0.035559	0
chrX:66028530-66028571	-0.73158	0.07716	-0.80714	0.067801	-0.07556	-0.009359
chrX:75023600-75023641	-1.02824	0.078606	-1.02824	0.078606	0	0
chrX:75907315-75907356	-0.72762	0.10094	-0.845587	0.10094	-0.117967	0
chrX:110557097-110557138	-0.194588	0.079012	-0.190042	0.079012	0.004546	0
chrX:124125660-124125701	-0.150648	0.087265	-0.150648	0.087265	0	0
chrX:154000504-154000545	0.00743185	0.065348	0.0351984	0.065348	0.0277666	0
chr1:3080018-3080059	-0.114349	0.055145	-0.114349	0.055145	0	0
chr1:3080018-3080059	-0.114349	0.055145	0.0805225	0.10335	0.194872	0.048205
chr1:3182262-3182303	-0.105991	0.073126	-0.0979604	0.073126	0.0080306	0
chr1:11111465-11111506	-1.09924	0.061761	-1.14757	0.061761	-0.04833	0
chr1:11796301-11796342	0.0493694	0.078606	0.10373	0.10603	0.0543606	0.027424
chr1:11796301-11796342	0.0493694	0.078606	0.0493694	0.078606	0	0
chr1:11796301-11796342	0.0493694	0.078606	0.076357	0.078606	0.0269876	0
chr1:11843999-11844040	0.0532503	0.087265	0.0532503	0.087265	0	0
chr1:20589725-20589766	-0.0191235	0.073126	-0.0745969	0.047573	-0.0554734	-0.025553
chr1:21664722-21664763	-0.593013	0.056171	-0.524444	0.056171	0.068569	0
chr1:22384364-22384405	0.0738117	0.10119	0.156696	0.10119	0.0828843	0
chr1:22384364-22384405	0.0738117	0.10119	0.133867	0.10119	0.0600553	0
chr1:23514104-23514145	-1.11363	0.047944	-1.11363	0.047944	0	0
chr1:25274236-25274277	-0.051251	0.073126	-0.051251	0.073126	0	0
chr1:25274236-25274277	-0.051251	0.073126	-0.0399015	0.073126	0.0113495	0
chr1:25351094-25351135	0.517339	0.074034	0.426987	0.074034	-0.090352	0
chr1:25406037-25406078	-0.0282432	0.064081	-0.0788953	0.064081	-0.0506521	0
chr1:25491671-25491712	-0.332814	0.064792	-0.332814	0.064792	0	0
chr1:26564325-26564366	0.463753	0.10603	0.484924	0.10603	0.021171	0
chr1:28890779-28890820	0.0337108	0.07355	0.00186936	0.07355	-0.0318414	0
chr1:28905799-28905840	-1.00845	0.049334	-1.00845	0.049334	0	0
chr9:137021468-137021509	-0.224554	0.071979	-0.224554	0.071979	0	0
chr1:181520862-181520903	-0.260632	0.059233	-0.182871	0.059233	0.077761	0
chr3:73668965-73669006	-0.29605	0.071007	-0.33399	0.071007	-0.03794	0
chr4:158952024-158952065	0.153231	0.1174	0.0599779	0.065635	-0.0932531	-0.051765
chr6:21263869-21263910	-0.0827257	0.048177	-0.0998435	0.073126	-0.0171178	0.024949
chr6:31599625-31599666	-0.143131	0.07635	-0.150915	0.07635	-0.007784	0
chr7:158914306-158914347	0.0712275	0.071979	-0.0146182	0.071979	-0.0858457	0
chr21:46138618-46138659	-0.0824935	0.066283	-0.127605	0.066283	-0.0451115	0
chr11:5422643-5422684	-0.13816	0.055066	-0.0467737	0.055066	0.0913863	0
chr1:152156598-152156639	0.0129616	0.078505	0.0129616	0.081055	0	0.00255
chr11:100977264-100977305	-0.188085	0.081794	-0.173956	0.081794	0.014129	0
chr22:38393911-38393952	0.0854237	0.082035	0.0928533	0.082035	0.0074296	0
chr1:149009637-149009678	-0.0148239	0.051406	-0.0451542	0.051406	-0.0303303	0
chr2:52142579-52142620	0.0397535	0.12153	0.201217	0.24459	0.161464	0.12306
chr6:29792079-29792120	-0.0904434	0.071979	-0.122508	0.071979	-0.0320646	0
chr6:31739933-31739974	0.0503022	0.10094	0.152788	0.11456	0.102486	0.01362
chr6:39927504-39927545	-0.1563	0.049545	-0.169312	0.06445	-0.013012	0.014905
chr7:142874876-142874917	-0.124094	0.063802	-0.0983728	0.063802	0.0257212	0
chr9:24906784-24906825	0.114262	0.068037	0.0680124	0.066283	-0.0462496	-0.001754
chr14:56979535-56979576	-0.25188	0.045237	-0.249803	0.045237	0.002077	0
chr17:62207824-62207865	0.0244209	0.050204	0.0505641	0.050204	0.0261432	0
chr1:3605977-3606018	-0.138558	0.16459	-0.138558	0.16459	0	0
chr6:64593187-64593228	-0.195634	0.047573	-0.214402	0.047573	-0.018768	0
chr8:33337917-33337958	0.0487537	0.054941	-0.0850605	0.054941	-0.133814	0
chr9:15347004-15347045	-0.108354	0.061102	-0.137101	0.11456	-0.028747	0.053458
chr9:104800503-104800544	-0.283506	0.05862	-0.138858	0.074884	0.144648	0.016264
chr9:104800503-104800544	-0.283506	0.05862	-0.0855798	0.05862	0.197926	0
chr19:41009338-41009379	-0.0203558	0.11456	0.00794087	0.11456	0.0282967	0
chr12:78014970-78015011	-0.0448309	0.057974	-0.0448309	0.057974	0	0
chr16:1247050-1247091	-0.183964	0.057969	-0.158179	0.065348	0.025785	0.007379
chr2:103382319-103382360	0.609068	0.10603	0.291797	0.10335	-0.317271	-0.00268
chr1:153421058-153421099	0.0043916	0.078123	0.0043916	0.078123	0	0
chr3:180909495-180909536	-0.112635	0.078606	-0.112635	0.078606	0	0
chr1:231385108-231385149	0.439099	0.16703	0.356219	0.16703	-0.08288	0
chr6:26463327-26463368	-0.12884	0.057969	-0.0160819	0.057969	0.112758	0
chr6:26463327-26463368	-0.12884	0.057969	-0.12884	0.057969	0	0
chr7:81729715-81729756	-0.177543	0.053407	-0.177543	0.053407	0	0
chr7:81729715-81729756	-0.177543	0.053407	-0.220447	0.053407	-0.042904	0
chr4:3436896-3436937	-0.0894642	0.073126	-0.16439	0.073126	-0.0749258	0
chr4:3445409-3445450	-0.0233689	0.061102	-0.0345071	0.065986	-0.0111382	0.004884
chr2:214317145-214317186	0.0673582	0.078606	0.0334969	0.078606	-0.0338613	0
chr3:20627559-20627600	-0.363508	0.03935	-0.606345	0.03935	-0.242837	0
chr3:20627559-20627600	-0.363508	0.03935	-0.539238	0.03935	-0.17573	0
chr5:88558557-88558598	-0.265766	0.07355	-0.265766	0.07355	0	0
chr5:88558557-88558598	-0.265766	0.07355	-0.312572	0.07355	-0.046806	0
chr5:88919757-88919798	0.207958	0.23167	0.207958	0.23167	0	0
chr8:34495072-34495113	-0.11498	0.10335	-0.0992852	0.069863	0.0156948	-0.033487
chr10:104987576-104987617	-0.145294	0.079685	-0.145294	0.079685	0	0
chr10:104987576-104987617	-0.145294	0.079685	-0.0697225	0.079685	0.0755715	0
chr12:89366947-89366988	0.010988	0.099993	0.010988	0.099993	0	0
chr1:73348456-73348497	0.0482055	0.12432	0.0482055	0.12432	0	0
chr5:104568505-104568546	-0.271094	0.1909	-0.347923	0.1909	-0.076829	0
chr5:104568505-104568546	-0.271094	0.1909	-0.271094	0.1909	0	0
chr7:114518879-114518920	-0.121654	0.077129	-0.113102	0.077129	0.008552	0
chr6:44249617-44249658	-0.402367	0.10094	-0.21958	0.10094	0.182787	0
chr6:46150296-46150337	0.297926	0.13286	0.081549	0.13286	-0.216377	0
chr6:49492419-49492460	0.0203344	0.1062	0.119042	0.1062	0.0987076	0
chr6:49639378-49639419	-0.123998	0.062437	-0.0946627	0.062437	0.0293353	0
chr6:49639378-49639419	-0.123998	0.062437	-0.124292	0.062437	-0.000294	0
chr6:53263179-53263220	-0.0417135	0.05862	-0.0893002	0.05862	-0.0475867	0
chr6:58069921-58069962	-0.116546	0.063879	-0.116546	0.063879	0	0
chr6:90238354-90238395	-0.125584	0.12479	-0.10217	0.12479	0.023414	0
chr6:107115942-107115983	0.0316104	0.066283	0.064121	0.066283	0.0325106	0
chr6:107115942-107115983	0.0316104	0.066283	0.0316104	0.066283	0	0
chr6:108977866-108977907	-0.146608	0.079685	-0.169879	0.071915	-0.023271	-0.00777
chr6:109248970-109249011	-0.0655209	0.10119	-0.033679	0.10119	0.0318419	0
chr6:109248970-109249011	-0.0655209	0.10119	-0.0470649	0.10119	0.018456	0
chr6:111176156-111176197	-0.0406085	0.10093	-0.0406085	0.10093	0	0
chr6:113065053-113065094	-0.47688	0.061251	-0.195244	0.061251	0.281636	0
chr6:121493537-121493578	-0.104628	0.089981	0.00260813	0.10335	0.107236	0.013369
chr6:121872710-121872751	-0.0814323	0.079685	-0.0806423	0.079685	0.00079	0
chr6:122572634-122572675	-0.784359	0.12153	-0.867008	0.12153	-0.082649	0
chr6:127361875-127361916	-0.323997	0.039479	-0.204408	0.03264	0.119589	-0.006839
chr6:131066864-131066905	-0.253535	0.068359	-0.287265	0.065635	-0.03373	-0.002724
chr6:135001462-135001503	-0.303576	0.068819	-0.313207	0.068819	-0.009631	0
chr6:135069678-135069719	-0.0447165	0.057938	-0.0800007	0.054028	-0.0352842	-0.00391
chr6:135074390-135074431	-0.192872	0.057969	-0.206032	0.054935	-0.01316	-0.003034
chr6:135097758-135097799	-0.273738	0.051462	-0.149224	0.08447	0.124514	0.033008
chr6:135097758-135097799	-0.273738	0.051462	-0.300081	0.051462	-0.026343	0
chr6:135110482-135110523	0.145635	0.082035	0.189056	0.087912	0.043421	0.005877
chr6:135110482-135110523	0.145635	0.082035	0.277945	0.094209	0.13231	0.012174
chr6:136823762-136823803	0.244874	0.081939	0.244874	0.081939	0	0
chr6:139373065-139373106	-0.0905404	0.066283	-0.0905404	0.066283	0	0
chr6:139507157-139507198	-0.564671	0.07635	-0.828465	0.07635	-0.263794	0
chr15:90883310-90883351	-0.113706	0.1094	-0.153965	0.068188	-0.040259	-0.041212
chr15:90883310-90883351	-0.113706	0.1094	-0.140654	0.068188	-0.026948	-0.041212
chr16:9833089-9833130	0.0583015	0.24459	0.0583015	0.24459	0	0
chr16:9833089-9833130	0.0583015	0.24459	0.0269037	0.24459	-0.0313978	0
chr16:29928536-29928577	-0.192847	0.074034	-0.056545	0.074034	0.136302	0
chr20:49474222-49474263	-0.03706	0.07635	0.00683287	0.07635	0.0438929	0
chr22:42175002-42175043	-0.204744	0.073126	-0.213134	0.073126	-0.00839	0
chr2:57760438-57760479	-0.255812	0.14539	-0.303794	0.14539	-0.047982	0
chr2:57760438-57760479	-0.255812	0.14539	-0.172638	0.14539	0.083174	0
chr12:2390663-2390704	0.0939413	0.11456	0.0404082	0.11456	-0.0535331	0
chr1:29964401-29964442	-5.26e-05	0.077129	-0.0218619	0.055637	-0.0218093	-0.021492
chr1:43634393-43634434	-0.197861	0.091992	-0.185174	0.20852	0.012687	0.116528
chr1:72812912-72812953	-0.189194	0.071315	-0.268112	0.071315	-0.078918	0
chr1:95121197-95121238	-0.0878788	0.1094	-0.0886762	0.1094	-0.000797	0
chr1:98087256-98087297	0.0923799	0.11856	0.21068	0.24888	0.1183	0.13032
chr1:150059474-150059515	0.0652016	0.081939	0.0472521	0.081939	-0.0179495	0
chr1:150059474-150059515	0.0652016	0.081939	0.0652016	0.081939	0	0
chr1:163758666-163758707	-0.332351	0.046557	-0.332351	0.046557	0	0
chr1:239046738-239046779	-0.181496	0.057938	-0.137735	0.057938	0.043761	0
chr2:27810651-27810692	-0.124848	0.12707	-0.159328	0.12707	-0.03448	0
chr2:96750396-96750437	0.123965	0.24459	0.0912972	0.24459	-0.0326678	0
chr2:96750396-96750437	0.123965	0.24459	0.0761084	0.24459	-0.0478566	0
chr2:22381248-22381289	0.0153061	0.06445	0.0153061	0.068509	0	0.004059
chr2:57844438-57844479	-0.358912	0.060083	-0.240801	0.060083	0.118111	0
chr2:57844438-57844479	-0.358912	0.060083	-0.25162	0.060083	0.107292	0
chr2:184597294-184597335	0.080932	0.078606	0.080932	0.078606	0	0
chr2:184597294-184597335	0.080932	0.078606	-0.0149676	0.063879	-0.0958996	-0.014727
chr2:184947193-184947234	-0.586019	0.064792	-0.451139	0.064433	0.13488	-0.000359
chr2:192983594-192983635	0.06989	0.10335	-0.0735083	0.068037	-0.143398	-0.035313
chr2:193513904-193513945	-0.431909	0.054941	-0.379693	0.054941	0.052216	0
chr2:197439833-197439874	-0.523882	0.057981	-0.741983	0.057981	-0.218101	0
chr2:197439833-197439874	-0.523882	0.057981	-0.431238	0.081794	0.092644	0.023813
chr3:2479618-2479659	0.0646423	0.21058	0.124834	0.21058	0.0601917	0
chr3:2479618-2479659	0.0646423	0.21058	0.0646423	0.21058	0	0
chr3:36814519-36814560	-0.260113	0.083283	-0.184529	0.054941	0.075584	-0.028342
chr3:36814519-36814560	-0.260113	0.083283	-0.186383	0.054941	0.07373	-0.028342
chr3:52781869-52781910	-0.0583757	0.064582	-0.0068951	0.053014	0.0514806	-0.011568
chr3:52781869-52781910	-0.0583757	0.064582	-0.0583757	0.064582	0	0
chr5:134570899-134570940	-0.0211684	0.1062	-0.0033946	0.1062	0.0177738	0
chr5:138376412-138376453	0.280141	0.1174	0.27493	0.1174	-0.005211	0
chr5:138376412-138376453	0.280141	0.1174	0.258492	0.1174	-0.021649	0
chr5:153160774-153160815	-0.0646797	0.059259	-0.0980761	0.050075	-0.0333964	-0.009184
chr5:153160774-153160815	-0.0646797	0.059259	-0.0599884	0.050075	0.0046913	-0.009184
chr6:27837457-27837498	-0.132928	0.069989	-0.184909	0.069989	-0.051981	0
chr6:29276422-29276463	-0.0303913	0.068819	-0.0234504	0.068819	0.0069409	0
chr6:29276422-29276463	-0.0303913	0.068819	-0.193707	0.068819	-0.163316	0
chr6:98136837-98136878	-0.734067	0.079012	-0.734067	0.079012	0	0
chr7:1990212-1990253	-0.0331018	0.07355	-0.0105038	0.07355	0.022598	0
chr7:86798290-86798331	-0.0987782	0.057981	-0.109094	0.057981	-0.0103158	0
chr7:86798290-86798331	-0.0987782	0.057981	-0.0987782	0.057981	0	0
chr7:140967145-140967186	0.35011	0.1062	0.361755	0.1062	0.011645	0
chr8:34163600-34163641	-0.170522	0.057914	-0.176838	0.057914	-0.006316	0
chr8:142229434-142229475	-0.0975338	0.071979	-0.100176	0.059559	-0.0026422	-0.01242
chr10:18439050-18439091	0.0724028	0.12214	0.148043	0.12214	0.0756402	0
chr10:102868457-102868498	0.0918078	0.1174	0.0918078	0.1174	0	0
chr11:66715774-66715815	-0.143263	0.037717	-0.244667	0.037717	-0.101404	0
chr11:66715774-66715815	-0.143263	0.037717	-0.139163	0.037717	0.0041	0
chr11:113522252-113522293	-0.0734984	0.0403	-0.105495	0.0403	-0.0319966	0
chr11:113522252-113522293	-0.0734984	0.0403	-0.132623	0.0403	-0.0591246	0
chr12:2299008-2299049	-0.502506	0.056989	-0.502506	0.056989	0	0
chr14:29718179-29718220	-0.0523578	0.081939	-0.0379724	0.081939	0.0143854	0
chr14:99246588-99246629	0.030809	0.077964	0.040358	0.17246	0.009549	0.094496
chr14:103795366-103795407	-0.125467	0.073126	-0.125467	0.073126	0	0
chr15:78616203-78616244	0.363787	0.081939	0.375571	0.081939	0.011784	0
chr15:78616203-78616244	0.363787	0.081939	0.369382	0.081939	0.005595	0
chr10:102869096-102869137	-0.112039	0.07716	-0.060437	0.07716	0.051602	0
chr10:102869096-102869137	-0.112039	0.07716	-0.0665389	0.07716	0.0455001	0
chr10:103192722-103192763	-0.123796	0.073126	-0.024295	0.073126	0.099501	0
chr10:103192722-103192763	-0.123796	0.073126	-0.082031	0.073126	0.041765	0
chr10:104809429-104809470	-0.279576	0.060086	-0.25754	0.060086	0.022036	0
chr11:24352979-24353020	0.48126	0.18127	0.345026	0.089981	-0.136234	-0.091289
chr11:46527184-46527225	-0.194819	0.037404	-0.194819	0.037404	0	0
chr11:109685092-109685133	-0.225345	0.046557	-0.148795	0.046557	0.07655	0
chr11:124744041-124744082	-0.223958	0.047696	-0.155068	0.10603	0.06889	0.058334
chr11:124744041-124744082	-0.223958	0.047696	-0.162982	0.061761	0.060976	0.014065
chr11:130861522-130861563	-0.166877	0.082035	-0.208597	0.082035	-0.04172	0
chr12:53211540-53211581	-0.316319	0.047672	-0.316319	0.047672	0	0
chr12:57228568-57228609	0.212915	0.15747	0.149231	0.16703	-0.063684	0.00956
chr12:57228568-57228609	0.212915	0.15747	0.0499892	0.15747	-0.162926	0
chr12:103202657-103202698	-0.0379931	0.071173	-0.107651	0.071173	-0.0696579	0
chr12:123180546-123180587	0.39434	0.09888	0.288528	0.09888	-0.105812	0
chr12:123180546-123180587	0.39434	0.09888	0.405308	0.09888	0.010968	0
chr14:71967265-71967306	-0.0019698	0.058817	-0.120174	0.058817	-0.118204	0
chr14:99252862-99252903	0.159468	0.081338	0.159468	0.081338	0	0
chr14:99252862-99252903	0.159468	0.081338	0.202406	0.081338	0.042938	0
chr15:78602397-78602438	-0.181284	0.068181	-0.181284	0.068181	0	0
chr15:84606324-84606365	0.144976	0.21648	0.00146175	0.21648	-0.143514	0
chr2:184736673-184736714	-0.43715	0.07716	-0.43715	0.07716	0	0
chr2:199851376-199851417	0.13735	0.11456	0.24706	0.11456	0.10971	0
chr3:2506082-2506123	-0.139294	0.059259	-0.139294	0.059259	0	0
chr3:2506082-2506123	-0.139294	0.059259	-0.133549	0.059259	0.005745	0
chr3:52803757-52803798	-0.122735	0.046557	-0.10035	0.046557	0.022385	0
chr3:52803757-52803798	-0.122735	0.046557	-0.125753	0.046557	-0.003018	0
chr3:63847354-63847395	-0.0969741	0.054368	-0.164614	0.054368	-0.0676399	0
chr3:63847354-63847395	-0.0969741	0.054368	-0.0214914	0.10093	0.0754827	0.046562
chr4:102267532-102267573	-0.181624	0.078662	-0.108973	0.078662	0.072651	0
chr4:102267532-102267573	-0.181624	0.078662	-0.15563	0.078662	0.025994	0
chr4:102267532-102267573	-0.181624	0.078662	-0.176918	0.078662	0.004706	0
chr4:169281691-169281732	0.176426	0.10335	0.18523	0.10335	0.008804	0
chr5:154301167-154301208	-0.258888	0.18127	-0.258888	0.18127	0	0
chr6:26210898-26210939	0.199097	0.1174	0.135566	0.1174	-0.063531	0
chr6:26210898-26210939	0.199097	0.1174	0.144383	0.1174	-0.054714	0
chr6:83573994-83574035	0.190146	0.067202	0.179659	0.07811	-0.010487	0.010908
chr6:92438603-92438644	-0.122802	0.06791	-0.184405	0.06791	-0.061603	0
chr6:92438603-92438644	-0.122802	0.06791	-0.313163	0.06791	-0.190361	0
chr7:21480574-21480615	0.0149938	0.086519	-0.398762	0.070779	-0.413756	-0.01574
chr7:24678330-24678371	0.313103	0.11856	0.239041	0.11856	-0.074062	0
chr7:87615624-87615665	-0.277575	0.074132	-0.277575	0.074132	0	0
chr7:87615624-87615665	-0.277575	0.074132	-0.240072	0.050399	0.037503	-0.023733
chr8:34141033-34141074	-0.343303	0.071915	-0.353076	0.066736	-0.009773	-0.005179
chr8:38415044-38415085	-0.0910059	0.06798	-0.0541042	0.06798	0.0369017	0
chr8:88576377-88576418	-0.426847	0.08447	-0.329208	0.08447	0.097639	0
chr8:142231552-142231593	-0.0559718	0.05862	-0.0564405	0.05862	-0.000469	0
chr8:142231552-142231593	-0.0559718	0.05862	-0.0559718	0.05862	0	0
chr10:18456156-18456197	-0.122637	0.099993	-0.122637	0.099993	0	0
chr11:46210385-46210426	-0.101975	0.047696	-0.133554	0.047696	-0.031579	0
chr11:57665835-57665876	-0.0351118	0.091992	-0.0185326	0.10603	0.0165792	0.014038
chr11:88962658-88962699	-0.171684	0.12432	-0.163263	0.12432	0.008421	0
chr11:112956124-112956165	0.183827	0.082035	0.26852	0.082035	0.084693	0
chr11:113506746-113506787	-0.0075995	0.11456	-0.002421	0.11456	0.00517843	0
chr11:113506746-113506787	-0.0075995	0.11456	-0.0075995	0.11456	0	0
chr11:118470914-118470955	0.00236247	0.087265	0.0329802	0.087265	0.0306177	0
chr12:117234514-117234555	-0.180719	0.073126	-0.180719	0.073126	0	0
chr12:120902776-120902817	-0.0456325	0.10603	0.0594787	0.10603	0.105111	0
chr13:53051626-53051667	-0.122899	0.054368	-0.122899	0.054368	0	0
chr13:53051626-53051667	-0.122899	0.054368	-0.157345	0.064433	-0.034446	0.010065
chr13:66367640-66367681	0.0216128	0.087912	-0.0576005	0.10603	-0.0792133	0.018118
chr13:66367640-66367681	0.0216128	0.087912	-0.0184652	0.087912	-0.040078	0
chr13:67627935-67627976	-0.299973	0.056669	-0.299973	0.056669	0	0
chr14:64219469-64219510	-0.001797	0.074664	-0.0028161	0.081258	-0.0010191	0.006594
chr15:47424946-47424987	-0.245345	0.038864	-0.245345	0.038864	0	0
chr15:77775271-77775312	-0.213496	0.057981	-0.24077	0.047696	-0.027274	-0.010285
chr16:6265859-6265900	-0.083806	0.049968	-0.0105818	0.049968	0.0732242	0
chr16:6265859-6265900	-0.083806	0.049968	-0.0930132	0.053014	-0.0092072	0.003046
chr16:7617310-7617351	-0.249974	0.082035	-0.125768	0.082035	0.124206	0
chr16:7617310-7617351	-0.249974	0.082035	-0.249974	0.082035	0	0
chr3:141428552-141428593	0.154212	0.10603	0.152965	0.10603	-0.001247	0
chr3:141428552-141428593	0.154212	0.10603	0.154212	0.10603	0	0
chr3:141529653-141529694	-0.0813969	0.089981	-0.0813682	0.089981	2.87e-05	0
chr3:142031068-142031109	-0.0419971	0.073126	-0.0567558	0.073126	-0.0147587	0
chr3:142469475-142469516	0.0342018	0.15747	0.100643	0.15747	0.0664412	0
chr3:142551497-142551538	0.135294	0.11856	0.0498804	0.081258	-0.0854136	-0.037302
chr3:149132004-149132045	-0.258505	0.057668	-0.306097	0.057668	-0.047592	0
chr3:150348733-150348774	-0.204782	0.047573	-0.199724	0.047573	0.005058	0
chr3:150348733-150348774	-0.204782	0.047573	-0.186103	0.047573	0.018679	0
chr3:160130692-160130733	-0.337214	0.071979	-0.531377	0.071979	-0.194163	0
chr3:169812087-169812128	-0.0087685	0.071979	-0.0087685	0.071979	0	0
chr3:169812087-169812128	-0.0087685	0.071979	-0.0185271	0.071979	-0.0097586	0
chr3:172576690-172576731	-0.0243378	0.10603	0.0108811	0.10603	0.0352189	0
chr3:172576690-172576731	-0.0243378	0.10603	-0.0243378	0.10603	0	0
chr3:177160454-177160495	-1.04113	0.068181	-1.04113	0.068181	0	0
chr3:179033537-179033578	-0.837057	0.082035	-0.837057	0.082035	0	0
chr3:179148434-179148475	-0.0577538	0.073126	-0.0577736	0.073126	-1.98e-05	0
chr3:184024520-184024561	0.257263	0.20852	0.0188029	0.11456	-0.23846	-0.09396
chr3:184372434-184372475	-0.134412	0.053014	-0.128525	0.053014	0.005887	0
chr3:184372434-184372475	-0.134412	0.053014	-0.137349	0.053014	-0.002937	0
chr3:185812514-185812555	-0.0011222	0.061824	-0.0011222	0.061824	0	0
chr3:188415631-188415672	-0.306808	0.064489	-0.254074	0.067019	0.052734	0.00253
chr3:188415631-188415672	-0.306808	0.064489	-0.327468	0.047788	-0.02066	-0.016701
chr3:196056172-196056213	-0.356991	0.045829	-0.303408	0.064489	0.053583	0.01866
chr3:196127896-196127937	-0.090131	0.04949	-0.168488	0.04949	-0.078357	0
chr3:196191073-196191114	0.397145	0.073126	0.313411	0.073126	-0.083734	0
chr3:196503900-196503941	0.0409654	0.073126	0.00452977	0.059259	-0.0364356	-0.013867
chr3:196791732-196791773	-0.896176	0.073126	-0.667781	0.057668	0.228395	-0.015458
chr4:1746453-1746494	-0.0871906	0.073126	-0.0390947	0.073126	0.0480959	0
chr4:3445136-3445177	-0.249902	0.073126	-0.165961	0.073126	0.083941	0
chr4:6918085-6918126	-0.222571	0.057981	-0.160844	0.057981	0.061727	0
chr4:15601426-15601467	-0.163141	0.087912	-0.0526425	0.15747	0.110498	0.069558
chr4:15601426-15601467	-0.163141	0.087912	-0.0499124	0.068181	0.113229	-0.019731
chr4:38654131-38654172	-0.0154576	0.11838	-0.0154576	0.11838	0	0
chr4:54485509-54485550	-0.0432445	0.064433	-0.0200802	0.063879	0.0231643	-0.000554
chr4:54542812-54542853	-0.0189699	0.10157	-0.0685099	0.10157	-0.04954	0
chr4:54542812-54542853	-0.0189699	0.10157	-0.0646413	0.10157	-0.0456714	0
chr4:54542688-54542729	0.0285472	0.059259	0.0359686	0.059259	0.0074214	0
chr4:54542688-54542729	0.0285472	0.059259	0.101654	0.10603	0.0731068	0.046771
chr4:56861125-56861166	-0.0121998	0.087912	0.0748267	0.15134	0.0870265	0.063428
chr4:56861125-56861166	-0.0121998	0.087912	-0.0043183	0.087912	0.00788146	0
chr4:56967900-56967941	-0.873967	0.069442	-0.873967	0.069442	0	0
chr4:70941612-70941653	-0.365727	0.066283	-0.335434	0.051238	0.030293	-0.015045
chr4:78776696-78776737	-0.0367315	0.073126	0.0138427	0.073126	0.0505742	0
chr4:82975645-82975686	0.103761	0.061761	0.103761	0.061761	0	0
chr4:87048955-87048996	-0.111353	0.1094	-0.0047405	0.1094	0.106612	0
chr4:99954563-99954604	0.625748	0.081939	0.546364	0.081939	-0.079384	0
chr4:99954563-99954604	0.625748	0.081939	0.625748	0.081939	0	0
chr4:100201639-100201680	-0.143735	0.10093	-0.185223	0.10093	-0.041488	0
chr4:102310750-102310791	0.0187416	0.077964	0.0572039	0.11998	0.0384623	0.042016
chr4:102557088-102557129	-0.134479	0.048384	0.025453	0.048384	0.159932	0
chr4:104884931-104884972	-0.0988465	0.087912	-0.0355591	0.087912	0.0632874	0
chr4:104884931-104884972	-0.0988465	0.087912	-0.0988465	0.087912	0	0
chr4:109717648-109717689	-0.16561	0.066283	-0.16561	0.066283	0	0
chr4:109717648-109717689	-0.16561	0.066283	-0.169182	0.066283	-0.003572	0
chr4:109947160-109947201	-0.271095	0.07811	-0.356921	0.07811	-0.085826	0
chr4:121877238-121877279	-0.0259065	0.06445	0.0460131	0.06445	0.0719196	0
chr4:128082200-128082241	0.0339901	0.1094	0.122505	0.1094	0.0885149	0
chr4:144104953-144104994	-0.0776748	0.064489	-0.0769427	0.064489	0.000732	0
chr4:144114678-144114719	-0.271359	0.051023	-0.271359	0.051023	0	0
chr4:145133945-145133986	0.0338034	0.12153	-0.163506	0.08447	-0.197309	-0.03706
chr4:145185729-145185770	-0.124478	0.11838	-0.201511	0.11838	-0.077033	0
chr4:153468614-153468655	-0.130059	0.067202	-0.128421	0.042405	0.001638	-0.024797
chr4:153636444-153636485	-0.0979345	0.073126	-0.0845457	0.073126	0.0133888	0
chr5:1104803-1104844	-0.0722344	0.071979	0.0264691	0.081258	0.0987035	0.009279
chr5:1104803-1104844	-0.0722344	0.071979	0.0285821	0.071979	0.100817	0
chr5:1285839-1285880	0.160626	0.073126	0.124922	0.073126	-0.035704	0
chr5:1285839-1285880	0.160626	0.073126	0.165728	0.073126	0.005102	0
chr5:1287059-1287100	-0.0522804	0.086519	-0.0042174	0.086519	0.048063	0
chr5:1287059-1287100	-0.0522804	0.086519	-0.0522804	0.086519	0	0
chr5:1287059-1287100	-0.0522804	0.086519	-0.0257746	0.086519	0.0265058	0
chr5:34528153-34528194	-0.141156	0.10094	-0.12343	0.10094	0.017726	0
chr5:36178171-36178212	0.0886879	0.11456	0.0826786	0.11456	-0.0060093	0
chr5:55979958-55979999	0.125487	0.13283	0.125487	0.13283	0	0
chr5:56508705-56508746	-0.097067	0.078606	-0.097067	0.078606	0	0
chr5:56508705-56508746	-0.097067	0.078606	-0.132902	0.078606	-0.035835	0
chr5:56564934-56564975	-0.0383192	0.17246	0.0496643	0.17246	0.0879835	0
chr5:56564934-56564975	-0.0383192	0.17246	-0.0383192	0.17246	0	0
chr5:62412986-62413027	-0.0875734	0.071979	-0.112731	0.073126	-0.0251576	0.001147
chr5:68313560-68313601	0.012777	0.06791	-0.0135009	0.06791	-0.0262779	0
chr5:68418399-68418440	0.0317168	0.069989	0.0476754	0.10603	0.0159586	0.036041
chr5:68418399-68418440	0.0317168	0.069989	0.0559209	0.069989	0.0242041	0
chr5:72940921-72940962	0.364582	0.061761	0.329225	0.075947	-0.035357	0.014186
chr5:73621594-73621635	-0.121099	0.081939	-0.178441	0.081939	-0.057342	0
chr5:76567774-76567815	-0.12466	0.071915	-0.12466	0.071915	0	0
chr5:88753504-88753545	0.0730994	0.04949	0.237655	0.10094	0.164556	0.05145
chr5:103264803-103264844	-0.22339	0.079059	-0.22339	0.079059	0	0
chr5:108417821-108417862	-0.260511	0.041493	-0.213183	0.069706	0.047328	0.028213
chr5:111726166-111726207	-0.163827	0.051406	-0.120092	0.061761	0.043735	0.010355
chr5:111726166-111726207	-0.163827	0.051406	-0.163827	0.051406	0	0
chr5:119269308-119269349	0.103782	0.10335	0.124926	0.10335	0.021144	0
chr5:133091140-133091181	-0.0668356	0.079012	-0.0668356	0.079012	0	0
chr5:157016035-157016076	-0.200678	0.071007	-0.251402	0.071007	-0.050724	0
chr5:157016035-157016076	-0.200678	0.071007	-0.200678	0.071007	0	0
chr5:157765174-157765215	-0.186501	0.074784	-0.186501	0.074784	0	0
chr3:27035199-27035240	-0.0167507	0.1062	-0.0489073	0.1062	-0.0321566	0
chr3:36294958-36294999	-0.202856	0.06791	-0.258182	0.06791	-0.055326	0
chr6:128276995-128277036	-0.0139636	0.079012	-0.0447145	0.079012	-0.0307509	0
chr9:1975952-1975993	-0.12576	0.073126	-0.13986	0.057981	-0.0141	-0.015145
chrX:4811989-4812030	0.125107	0.07716	-0.0540549	0.07716	-0.179162	0
chr1:11711419-11711460	0.0627385	0.073126	0.064079	0.064081	0.0013405	-0.009045
chr13:19911025-19911066	-0.933659	0.10603	-0.933659	0.10603	0	0
chr2:150552633-150552674	0.00419811	0.060305	0.00419811	0.060305	0	0
chr18:5231116-5231157	-0.243916	0.08447	0.0279543	0.11838	0.27187	0.03391
chr2:217056026-217056067	-0.0211466	0.061251	0.023356	0.061251	0.0445026	0
chr2:217056026-217056067	-0.0211466	0.061251	-0.0211466	0.061251	0	0
chr3:27359736-27359777	-0.320914	0.042405	-0.284544	0.042405	0.03637	0
chr5:44926396-44926437	0.0328204	0.094209	0.118128	0.094209	0.0853076	0
chr5:56715510-56715551	-0.0288421	0.063879	-0.0859061	0.063879	-0.057064	0
chr10:121586582-121586623	-0.1365	0.083283	-0.112814	0.083283	0.023686	0
chr10:121586582-121586623	-0.1365	0.083283	-0.1365	0.083283	0	0
chr16:52565256-52565297	0.0441243	0.066198	-0.0441184	0.066198	-0.0882427	0
chr22:28365140-28365181	-0.0463058	0.047696	-0.0861543	0.047696	-0.0398485	0
chr22:28365140-28365181	-0.0463058	0.047696	-0.108157	0.047696	-0.0618512	0
chr12:50750629-50750670	-0.140198	0.066469	-0.0806248	0.060439	0.0595732	-0.00603
chr12:50750629-50750670	-0.140198	0.066469	-0.109755	0.060439	0.030443	-0.00603
chr12:53389370-53389411	-0.379886	0.10335	-0.501535	0.10335	-0.121649	0
chr12:53738787-53738828	-0.299538	0.057981	-0.260432	0.057981	0.039106	0
chr12:54300756-54300797	-0.0694164	0.078606	-0.0821863	0.078606	-0.0127699	0
chr12:68801952-68801993	0.0269088	0.057938	0.0269088	0.057938	0	0
chr12:88451238-88451279	-0.176398	0.086519	-0.20811	0.080149	-0.031712	-0.00637
chr12:89880824-89880865	-0.148938	0.055093	-0.145759	0.043324	0.003179	-0.011769
chr12:111472395-111472436	0.15204	0.069863	0.0173116	0.054028	-0.134728	-0.015835
chr12:111472395-111472436	0.15204	0.069863	0.15204	0.069863	0	0
chr12:111855748-111855789	0.700592	0.10335	0.386511	0.10335	-0.314081	0
chr12:111599176-111599217	-0.13833	0.073126	-0.0923315	0.073126	0.0459985	0
chr12:112182073-112182114	-0.73427	0.1174	-0.833886	0.1174	-0.099616	0
chr12:115114612-115114653	0.163136	0.1174	0.249982	0.1174	0.086846	0
chr12:115114612-115114653	0.163136	0.1174	0.255082	0.1174	0.091946	0
chr12:115114612-115114653	0.163136	0.1174	0.163136	0.1174	0	0
chr12:120237194-120237235	0.116532	0.066283	0.116532	0.066283	0	0
chr12:121830511-121830552	-0.236832	0.079685	-0.26229	0.079685	-0.025458	0
chr12:122050286-122050327	-0.307998	0.064582	-0.34714	0.064582	-0.039142	0
chr12:122678219-122678260	0.021825	0.070779	0.021825	0.073645	0	0.002866
chr12:124035764-124035805	-0.0412495	0.075272	-0.044239	0.068177	-0.0029895	-0.007095
chr12:124035764-124035805	-0.0412495	0.075272	-0.0491649	0.068177	-0.0079154	-0.007095
chr12:124379281-124379322	-0.0403001	0.064489	-0.0403001	0.064489	0	0
chr12:124818709-124818750	-0.0882401	0.087806	-0.0882401	0.087806	0	0
chr11:116792392-116792433	-0.0358634	0.061251	-0.0358634	0.061251	0	0
chr11:116792392-116792433	-0.0358634	0.061251	-0.0330726	0.061251	0.0027908	0
chr11:119260204-119260245	-1.05935	0.066198	-1.05935	0.066198	0	0
chr11:128792664-128792705	-0.0200487	0.072668	-0.224316	0.064866	-0.204267	-0.007802
chr12:1667557-1667598	0.18435	0.11838	0.147419	0.11838	-0.036931	0
chr12:1667557-1667598	0.18435	0.11838	0.136572	0.11838	-0.047778	0
chr12:6393074-6393115	0.160317	0.074884	0.00438742	0.074884	-0.15593	0
chr12:6601961-6602002	-0.118767	0.068037	-0.109744	0.068037	0.009023	0
chr12:6601961-6602002	-0.118767	0.068037	-0.118767	0.068037	0	0
chr12:7045756-7045797	-0.054702	0.080149	-0.06473	0.080149	-0.010028	0
chr12:8042961-8043002	-0.0119571	0.085835	-0.0063243	0.085835	0.00563278	0
chr12:8805878-8805919	0.350437	0.15134	0.303957	0.15134	-0.04648	0
chr12:12734857-12734898	-0.0698007	0.052992	0.00577339	0.062602	0.0755741	0.00961
chr12:14440948-14440989	0.0246881	0.07716	-0.0222018	0.07716	-0.0468899	0
chr12:26886910-26886951	-0.0167283	0.054368	-0.135755	0.061761	-0.119027	0.007393
chr12:31966162-31966203	-0.0872461	0.1062	-0.0872461	0.1062	0	0
chr12:48105328-48105369	0.0147674	0.1174	0.0278229	0.1174	0.0130555	0
chr11:93548943-93548984	-0.135801	0.064433	-0.0539655	0.09888	0.0818355	0.034447
chr8:127091704-127091745	-0.142806	0.074884	-0.107999	0.082031	0.034807	0.007147
chr8:127075564-127075605	0.414015	0.15134	0.414015	0.15134	0	0
chr8:127091672-127091713	0.0680254	0.078823	0.0341115	0.078505	-0.0339139	-0.000318
chr8:127527095-127527136	-0.0763579	0.049968	-0.0763579	0.049968	0	0
chr8:23676485-23676526	-0.0995964	0.059259	0.000404	0.1094	0.1	0.050141
chr8:127096151-127096192	-0.229615	0.050204	-0.237878	0.050204	-0.008263	0
chr21:46490590-46490631	-0.168746	0.08447	-0.0623765	0.08447	0.10637	0
chr22:21574288-21574329	-0.205064	0.05165	-0.227414	0.059259	-0.02235	0.007609
chr22:21574288-21574329	-0.205064	0.05165	-0.205064	0.05165	0	0
chr22:24248648-24248689	0.0167493	0.079956	0.00419722	0.079956	-0.0125521	0
chr22:29220256-29220297	-0.0799179	0.071979	0.0327841	0.071979	0.112702	0
chr22:29220256-29220297	-0.0799179	0.071979	0.0118125	0.071979	0.0917304	0
chr22:30491548-30491589	-0.0477454	0.073126	-0.0477454	0.073126	0	0
chr22:30495293-30495334	0.0715283	0.12214	0.0763195	0.12214	0.0047912	0
chr22:32503851-32503892	0.0653568	0.24888	0.116484	0.24888	0.0511272	0
chr22:37057196-37057237	0.127834	0.1094	0.127834	0.1094	0	0
chr22:37066876-37066917	0.0552197	0.073126	0.0552197	0.073126	0	0
chr22:37066876-37066917	0.0552197	0.073126	0.0668557	0.073126	0.011636	0
chr22:37066876-37066917	0.0552197	0.073126	0.0835963	0.073126	0.0283766	0
chr22:37110932-37110973	-0.0072111	0.066283	-0.0252521	0.066283	-0.018041	0
chr22:37987210-37987251	-0.230634	0.035445	-0.225274	0.073126	0.00536	0.037681
chr22:38636751-38636792	-1.05465	0.12214	-1.05465	0.12214	0	0
chr22:42152914-42152955	0.00600099	0.073126	0.00600099	0.073126	0	0
chr22:42718525-42718566	0.600902	0.081939	0.415684	0.081939	-0.185218	0
chr22:42718525-42718566	0.600902	0.081939	0.400116	0.081939	-0.200786	0
chr22:43945004-43945045	-0.0712537	0.081258	-0.0712537	0.081258	0	0
chr22:43945004-43945045	-0.0712537	0.081258	-0.085557	0.071979	-0.0143033	-0.009279
chr22:43945004-43945045	-0.0712537	0.081258	-0.0760058	0.071979	-0.0047521	-0.009279
chr22:50552584-50552625	0.0440268	0.11456	0.0262607	0.11456	-0.0177661	0
chr1:109690341-109690382	-0.12377	0.04748	-0.0414273	0.049955	0.0823427	0.002475
chr1:109690341-109690382	-0.12377	0.04748	-0.12377	0.049955	0	0.002475
chr1:110325176-110325217	-0.191294	0.065863	-0.10722	0.065863	0.084074	0
chr1:111137094-111137135	-0.284152	0.073126	-0.283826	0.071979	0.000326	-0.001147
chr1:113876847-113876888	0.0687287	0.18127	0.135303	0.18127	0.0665743	0
chr1:114446569-114446610	-0.236121	0.064489	-0.236121	0.064489	0	0
chr1:114446569-114446610	-0.236121	0.064489	-0.0907791	0.1062	0.145342	0.041711
chr1:119714933-119714974	-0.24626	0.061249	-0.171455	0.054986	0.074805	-0.006263
chr1:119714933-119714974	-0.24626	0.061249	-0.24626	0.061249	0	0
chr1:150986340-150986381	0.232257	0.083283	0.232257	0.083283	0	0
chr1:150986340-150986381	0.232257	0.083283	0.325884	0.24459	0.093627	0.161307
chr1:154278763-154278804	-1.21602	0.058605	-1.21602	0.058605	0	0
chr1:154278763-154278804	-1.21602	0.058605	-1.24044	0.058605	-0.02442	0
chr1:154370990-154371031	0.168388	0.1174	0.200166	0.1174	0.031778	0
chr1:156937303-156937344	-0.0816362	0.07716	-0.0816362	0.07716	0	0
chr1:158613028-158613069	-0.106205	0.071173	0.0113244	0.073126	0.117529	0.001953
chr1:158668450-158668491	-0.08618	0.099993	-0.0981291	0.099993	-0.0119491	0
chr1:162196836-162196877	-0.0028534	0.08447	0.00166931	0.08447	0.00452271	0
chr1:172432967-172433008	0.0837071	0.085835	0.0837071	0.085835	0	0
chr1:179955193-179955234	-0.0174853	0.073126	0.0139833	0.073126	0.0314686	0
chr1:179973576-179973617	-0.0284865	0.086519	0.23598	0.10157	0.264466	0.015051
chr1:198573877-198573918	0.0103501	0.11838	0.0927056	0.11838	0.0823555	0
chr1:198573877-198573918	0.0103501	0.11838	0.0103501	0.11838	0	0
chr1:198644805-198644846	-0.395332	0.061251	-0.395332	0.061251	0	0
chr1:199041572-199041613	0.0388379	0.24673	0.0529279	0.24673	0.01409	0
chr1:199041572-199041613	0.0388379	0.24673	0.0224697	0.24673	-0.0163682	0
chr1:202160057-202160098	-0.0931257	0.071979	-0.0912394	0.079059	0.0018863	0.00708
chr1:202160057-202160098	-0.0931257	0.071979	-0.0457013	0.071979	0.0474244	0
chr1:203306259-203306300	0.252639	0.24459	0.0128381	0.094481	-0.239801	-0.150109
chrX:2748323-2748364	0.224991	0.1498	0.107761	0.12153	-0.11723	-0.02827
chrX:11265685-11265726	0.172074	0.082035	0.155773	0.082035	-0.016301	0
chrX:55040021-55040062	-1.06483	0.050925	-0.911552	0.10335	0.153278	0.052425
chrX:66043960-66044001	-0.142587	0.073126	-0.145388	0.073126	-0.002801	0
chrX:66043960-66044001	-0.142587	0.073126	-0.123171	0.073126	0.019416	0
chrX:74803744-74803785	-0.758419	0.038885	-0.758419	0.038885	0	0
chrX:80494636-80494677	-0.190961	0.069202	-0.179645	0.069202	0.011316	0
chrX:110519405-110519446	-0.0446129	0.08817	-0.0446129	0.08817	0	0
chrX:124039621-124039662	-1.12646	0.050258	-1.12646	0.050258	0	0
chrX:154383991-154384032	-0.0457257	0.052992	-0.0457257	0.052992	0	0
chrX:154672732-154672773	0.381624	0.081939	0.157842	0.078606	-0.223782	-0.003333
chr20:43702797-43702838	-0.0719917	0.08447	-0.0593815	0.04303	0.0126102	-0.04144
chr1:2214706-2214747	-0.228108	0.073126	-0.215226	0.073126	0.012882	0
chr1:3774944-3774985	0.0541635	0.10335	0.0541635	0.10335	0	0
chr1:3774944-3774985	0.0541635	0.10335	-0.0367848	0.073126	-0.0909483	-0.030224
chr1:6541256-6541297	-0.065109	0.071979	-0.0773039	0.062602	-0.0121949	-0.009377
chr1:11798880-11798921	-0.483243	0.071979	-0.453048	0.071979	0.030195	0
chr1:20589188-20589229	-0.0302413	0.047696	-0.0567843	0.047696	-0.026543	0
chr1:20589188-20589229	-0.0302413	0.047696	-0.045925	0.047696	-0.0156837	0
chr1:20895940-20895981	0.0673215	0.1174	0.00545581	0.1174	-0.0618657	0
chr1:22960239-22960280	-0.130473	0.1062	-0.0724078	0.1062	0.0580652	0
chr1:25419134-25419175	0.0442661	0.081008	0.115052	0.11856	0.0707859	0.037552
chr1:26544689-26544730	0.306957	0.077964	0.306957	0.077964	0	0
chr1:35663523-35663564	-0.325369	0.049545	-0.0140547	0.17246	0.311314	0.122915
chr1:39962283-39962324	-0.172763	0.043324	-0.111201	0.043324	0.061562	0
chr1:42970678-42970719	-0.387912	0.073126	-0.331845	0.073126	0.056067	0
chr1:51050054-51050095	-0.315987	0.034249	-0.365053	0.043221	-0.049066	0.008972
chr1:62437183-62437224	-0.129845	0.071979	-0.129845	0.071979	0	0
chr1:63565359-63565400	-0.165309	0.17246	-0.165309	0.17246	0	0
chr1:65528862-65528903	0.59186	0.053922	0.59186	0.053922	0	0
chr1:77979061-77979102	-0.238743	0.059259	-0.224316	0.071979	0.014427	0.01272
chr1:77979061-77979102	-0.238743	0.059259	-0.238743	0.059259	0	0
chr1:91121984-91122025	-0.123295	0.065863	0.0409831	0.065863	0.164278	0
chr1:92590364-92590405	0.00109671	0.10335	0.108356	0.10335	0.107259	0
chr1:93348834-93348875	0.116014	0.1062	0.0792388	0.1062	-0.0367752	0
chr1:93348834-93348875	0.116014	0.1062	-0.213336	0.1062	-0.32935	0
chr1:108045942-108045983	-0.0526164	0.066283	-0.0929306	0.066283	-0.0403142	0
chr19:19345435-19345476	-0.00685	0.11456	-0.0103548	0.11456	-0.0035048	0
chr19:19345435-19345476	-0.00685	0.11456	-0.00685	0.11456	0	0
chr1:204390616-204390657	0.237608	0.11998	0.0765743	0.11998	-0.161034	0
chr1:101559414-101559455	-0.145314	0.048384	-0.153609	0.055145	-0.008295	0.006761
chr12:128699867-128699908	-0.0913106	0.11456	-0.108252	0.11456	-0.0169414	0
chr13:85811957-85811998	-0.0127417	0.085835	-0.197223	0.053407	-0.184481	-0.032428
chr15:31179249-31179290	0.0197413	0.062602	0.12547	0.062602	0.105729	0
chr13:112981822-112981863	-0.108267	0.063879	-0.0993582	0.057981	0.0089088	-0.005898
chr14:58371930-58371971	-0.0211675	0.11456	0.0710657	0.11456	0.0922332	0
chr15:67157947-67157988	0.0737534	0.06798	-0.0210485	0.10093	-0.0948019	0.03295
chr15:67157947-67157988	0.0737534	0.06798	0.113884	0.11456	0.0401306	0.04658
chr15:73931355-73931396	0.097347	0.18127	0.100326	0.18127	0.002979	0
chr15:78849422-78849463	-0.0621659	0.078505	-0.114589	0.057981	-0.0524231	-0.020524
chr15:81085356-81085397	0.205294	0.24888	0.226185	0.24888	0.020891	0
chr16:15823961-15824002	0.0281614	0.10603	-0.0877834	0.10603	-0.115945	0
chr16:72067606-72067647	-0.0358235	0.081338	0.0225909	0.073126	0.0584144	-0.008212
chr16:72067606-72067647	-0.0358235	0.081338	0.0791061	0.073126	0.11493	-0.008212
chr16:75408225-75408266	-0.361484	0.048466	-0.361484	0.048466	0	0
chr16:83012165-83012206	-0.28543	0.079012	-0.413421	0.079012	-0.127991	0
chr16:83012165-83012206	-0.28543	0.079012	-0.129735	0.079012	0.155695	0
chr17:2141959-2142000	-0.254643	0.077129	-0.271796	0.077129	-0.017153	0
chr17:2141959-2142000	-0.254643	0.077129	-0.22395	0.077129	0.030693	0
chr17:29611386-29611427	-0.0347291	0.057981	-0.0940727	0.057981	-0.0593436	0
chr17:29611386-29611427	-0.0347291	0.057981	-0.0736878	0.057981	-0.0389587	0
chr17:31706475-31706516	-0.0121269	0.07716	-0.0543355	0.07716	-0.0422086	0
chr17:31706475-31706516	-0.0121269	0.07716	-0.0121269	0.07716	0	0
chr17:42118200-42118241	0.00656619	0.057668	-0.0657077	0.07716	-0.0722739	0.019492
chr17:46904695-46904736	-0.0461696	0.064792	-0.0915052	0.064792	-0.0453356	0
chr17:49411441-49411482	0.90102	0.081939	0.655611	0.081939	-0.245409	0
chr17:61159632-61159673	-0.0237836	0.17246	0.0911664	0.17246	0.11495	0
chr17:64322620-64322661	-0.196922	0.05862	-0.121591	0.05862	0.075331	0
chr18:48990078-48990119	0.127915	0.23167	0.127915	0.23167	0	0
chr18:60171148-60171189	-0.141376	0.068359	-0.134011	0.068359	0.007365	0
chr18:60171148-60171189	-0.141376	0.068359	-0.141376	0.068359	0	0
chr19:11081497-11081538	-0.112848	0.078662	-0.0849791	0.078662	0.0278689	0
chr19:11081497-11081538	-0.112848	0.078662	-0.0968148	0.078662	0.0160332	0
chr19:17734113-17734154	0.0839498	0.11456	0.100851	0.11456	0.0169012	0
chr19:44923515-44923556	0.249478	0.081939	0.14074	0.081939	-0.108738	0
chr19:44923515-44923556	0.249478	0.081939	0.179991	0.081939	-0.069487	0
chr20:41244108-41244149	-0.0394385	0.053713	-0.061863	0.053713	-0.0224245	0
chr20:45980242-45980283	0.248675	0.071979	0.283914	0.071979	0.035239	0
chr20:64077901-64077942	-0.107287	0.047696	-0.0992123	0.048014	0.0080747	0.000318
chr22:30273874-30273915	0.0615021	0.08447	0.0610533	0.08447	-0.000449	0
chr22:30273874-30273915	0.0615021	0.08447	0.00250485	0.08447	-0.0589972	0
chr22:40547008-40547049	-0.104547	0.073126	-0.128771	0.073126	-0.024224	0
chr3:128481596-128481637	-0.0847435	0.061761	-0.129645	0.061761	-0.0449015	0
chr3:128575248-128575289	0.287453	0.081939	0.0910552	0.081939	-0.196398	0
chr3:128599134-128599175	-0.0654648	0.1174	-0.0857983	0.1174	-0.0203335	0
chr3:128599134-128599175	-0.0654648	0.1174	-0.0820872	0.1174	-0.0166224	0
chr3:128670796-128670837	0.372241	0.10603	0.320563	0.10603	-0.051678	0
chr3:128670796-128670837	0.372241	0.10603	0.341003	0.10603	-0.031238	0
chr1:8850031-8850072	-0.886768	0.059259	-0.592037	0.059259	0.294731	0
chr1:8850031-8850072	-0.886768	0.059259	-0.886768	0.059259	0	0
chr1:22014466-22014507	-0.377875	0.062602	-0.427385	0.08447	-0.04951	0.021868
chr1:26661135-26661176	-0.561758	0.063802	-0.489336	0.073126	0.072422	0.009324
chr1:26661135-26661176	-0.561758	0.063802	-0.721926	0.063802	-0.160168	0
chr1:26819320-26819361	-1.07038	0.047944	-1.08436	0.047944	-0.01398	0
chr1:36478295-36478336	0.281125	0.07716	0.230305	0.06445	-0.05082	-0.01271
chr1:36478295-36478336	0.281125	0.07716	0.206031	0.06445	-0.075094	-0.01271
chr1:36480092-36480133	0.0136455	0.068177	8.99e-05	0.069073	-0.0135556	0.000896
chr1:36480092-36480133	0.0136455	0.068177	0.0136455	0.068177	0	0
chr1:42956266-42956307	0.499445	0.081939	0.499445	0.081939	0	0
chr1:50750603-50750644	-0.98381	0.12153	-0.98381	0.12153	0	0
chr1:56299719-56299760	0.130057	0.12432	-0.0174667	0.080149	-0.147524	-0.044171
chr1:56508586-56508627	-0.230554	0.057981	-0.230554	0.057981	0	0
chr1:65440426-65440467	-0.402761	0.057938	-0.200652	0.057938	0.202109	0
chr1:65440426-65440467	-0.402761	0.057938	-0.402761	0.057938	0	0
chr1:65612702-65612743	-0.269713	0.082035	-0.239369	0.082035	0.030344	0
chr1:67005140-67005181	-0.0878105	0.081258	-0.129891	0.071173	-0.0420805	-0.010085
chr1:67005140-67005181	-0.0878105	0.081258	-0.0878105	0.081258	0	0
chr1:92300861-92300902	-0.0533446	0.074884	-0.0467848	0.074884	0.0065598	0
chr1:100741107-100741148	-0.208939	0.061413	-0.208939	0.061413	0	0
chr1:100759868-100759909	-0.0776679	0.082031	-0.0776679	0.082031	0	0
chr1:101193767-101193808	-0.0054239	0.081794	0.0746081	0.059259	0.080032	-0.022535
chr1:101193767-101193808	-0.0054239	0.081794	-0.0054239	0.081794	0	0
chr2:160483581-160483622	0.0624833	0.056078	0.0181464	0.056078	-0.0443369	0
chr2:160483581-160483622	0.0624833	0.056078	0.0624833	0.056078	0	0
chr2:162267521-162267562	-0.245315	0.054986	-0.240692	0.054986	0.004623	0
chr2:162267521-162267562	-0.245315	0.054986	-0.261054	0.054986	-0.015739	0
chr2:162267521-162267562	-0.245315	0.054986	-0.160064	0.054986	0.085251	0
chr2:162267521-162267562	-0.245315	0.054986	-0.245315	0.054986	0	0
chr2:181459296-181459337	0.0740474	0.078662	-0.0938988	0.078662	-0.167946	0
chr2:191656533-191656574	-0.235482	0.068819	-0.24908	0.068819	-0.013598	0
chr2:210678311-210678352	-0.35116	0.11838	-0.35116	0.11838	0	0
chr2:210678311-210678352	-0.35116	0.11838	-0.429626	0.11838	-0.078466	0
chr2:218135239-218135280	-0.0245566	0.066283	-0.0183411	0.065635	0.0062155	-0.000648
chr2:218135239-218135280	-0.0245566	0.066283	0.050631	0.065635	0.0751876	-0.000648
chr2:218135487-218135528	-0.0210368	0.09888	-0.0046316	0.09888	0.0164052	0
chr2:218135524-218135565	-0.108353	0.1174	-0.135227	0.1174	-0.026874	0
chr2:218156215-218156256	-0.0645192	0.09888	-0.166181	0.09888	-0.101662	0
chr2:218156215-218156256	-0.0645192	0.09888	-0.0653713	0.09888	-0.000852	0
chr2:218270207-218270248	-0.0243351	0.059259	-0.0243351	0.059259	0	0
chr2:219180293-219180334	-0.0294628	0.073126	-0.0294628	0.073126	0	0
chr2:231717355-231717396	-0.0411219	0.051406	-0.0755914	0.073126	-0.0344695	0.02172
chr2:233204391-233204432	-0.0651032	0.07716	-0.137986	0.073126	-0.0728828	-0.004034
chr2:236887729-236887770	-0.119832	0.10603	-0.0686635	0.10603	0.0511685	0
chr3:42833687-42833728	-0.487433	0.07355	-0.625589	0.07355	-0.138156	0
chr3:47125323-47125364	-1.0957	0.099993	-1.0957	0.099993	0	0
chr3:58052858-58052899	-0.114824	0.073126	-0.114824	0.073126	0	0
chr3:63837319-63837360	-0.799747	0.079956	-0.921609	0.079956	-0.121862	0
chr3:69793474-69793515	-0.106824	0.1062	-0.112235	0.1062	-0.005411	0
chr3:71479772-71479813	0.213755	0.10157	0.203022	0.10157	-0.010733	0
chr3:98687930-98687971	0.00744462	0.060703	0.00107894	0.051567	-0.0063657	-0.009136
chr3:98687930-98687971	0.00744462	0.060703	0.0210334	0.051567	0.0135888	-0.009136
chr3:107576798-107576839	-0.394843	0.071979	-0.333189	0.061761	0.061654	-0.010218
chr3:120069646-120069687	-0.954387	0.049397	-0.988442	0.049397	-0.034055	0
chr16:20576226-20576267	-0.167384	0.059259	-0.167384	0.059259	0	0
chr16:28568575-28568616	-0.155625	0.081338	-0.114349	0.081338	0.041276	0
chr16:28568575-28568616	-0.155625	0.081338	-0.155625	0.081338	0	0
chr17:66626406-66626447	0.152591	0.051238	0.168018	0.073126	0.015427	0.021888
chr16:34995861-34995902	0.0249164	0.063879	0.0249164	0.063879	0	0
chr16:51121112-51121153	-0.143271	0.1062	0.0174481	0.1062	0.160719	0
chr16:68260877-68260918	-0.0444241	0.066283	-0.0649778	0.071979	-0.0205537	0.005696
chr16:68260877-68260918	-0.0444241	0.066283	-0.0523275	0.061761	-0.0079034	-0.004522
chr16:81846688-81846729	0.212088	0.17246	0.160082	0.12069	-0.052006	-0.05177
chr16:81846688-81846729	0.212088	0.17246	0.103235	0.12069	-0.108853	-0.05177
chr17:3045144-3045185	-1.08015	0.051023	-1.08015	0.051023	0	0
chr18:36142733-36142774	-0.0744551	0.071436	-0.21514	0.071436	-0.140685	0
chr18:36142733-36142774	-0.0744551	0.071436	-0.096275	0.071436	-0.0218199	0
chr18:74506768-74506809	-0.0455309	0.073126	0.0118703	0.073126	0.0574012	0
chr18:74506768-74506809	-0.0455309	0.073126	-0.0402952	0.11456	0.0052357	0.041434
chr18:74507725-74507766	-0.0744551	0.063879	-0.184536	0.063879	-0.110081	0
chr18:74507725-74507766	-0.0744551	0.063879	-0.125545	0.063879	-0.0510899	0
chr19:15873572-15873613	-0.348992	0.064489	-0.268247	0.064489	0.080745	0
chr19:15873572-15873613	-0.348992	0.064489	-0.289429	0.064489	0.059563	0
chr19:48802144-48802185	-0.118902	0.073049	-0.0689293	0.081939	0.0499727	0.00889
chr20:46616187-46616228	0.106526	0.062437	0.1708	0.078606	0.064274	0.016169
chr1:62494410-62494451	0.0329357	0.069989	0.0153453	0.069989	-0.0175904	0
chr11:2183467-2183508	-0.0069687	0.077964	-0.0069687	0.077964	0	0
chr11:61790334-61790375	-0.0602288	0.048384	-0.0392782	0.048384	0.0209506	0
chr11:61790334-61790375	-0.0602288	0.048384	-0.0602288	0.048384	0	0
chr11:61790334-61790375	-0.0602288	0.048384	-0.0214159	0.066471	0.0388129	0.018087
chr11:61790334-61790375	-0.0602288	0.048384	-0.051616	0.09888	0.0086128	0.050496
chr11:61811971-61812012	0.158763	0.081939	0.0175566	0.081939	-0.141206	0
chr11:61811971-61812012	0.158763	0.081939	0.158763	0.081939	0	0
chr11:61811971-61812012	0.158763	0.081939	0.0565704	0.081939	-0.102193	0
chr11:61811971-61812012	0.158763	0.081939	0.127206	0.081939	-0.031557	0
chr11:123062048-123062089	-0.108382	0.065863	-0.108382	0.065863	0	0
chr11:123062048-123062089	-0.108382	0.065863	-0.0565624	0.065863	0.0518196	0
chr12:21190879-21190920	-0.106963	0.073126	-0.328415	0.073126	-0.221452	0
chr12:21190879-21190920	-0.106963	0.073126	-0.129762	0.073126	-0.022799	0
chr14:63766979-63767020	0.0231239	0.15747	0.053527	0.15747	0.0304031	0
chr14:63766979-63767020	0.0231239	0.15747	0.149497	0.15747	0.126373	0
chr14:63766979-63767020	0.0231239	0.15747	0.126704	0.15747	0.10358	0
chr16:20463936-20463977	-0.192602	0.086519	-0.28104	0.086519	-0.088438	0
chr16:20463936-20463977	-0.192602	0.086519	-0.158115	0.086519	0.034487	0
chr16:56956784-56956825	-0.0255396	0.063879	-0.0787293	0.051406	-0.0531897	-0.012473
chr16:56956784-56956825	-0.0255396	0.063879	-0.0159008	0.051406	0.0096388	-0.012473
chr19:55226793-55226834	-0.0228786	0.067019	-0.0277494	0.067019	-0.0048708	0
chr19:55226793-55226834	-0.0228786	0.067019	-0.0228786	0.067019	0	0
chr6:160154314-160154355	-0.0786503	0.057683	-0.0786503	0.057683	0	0
chr6:160154314-160154355	-0.0786503	0.057683	-0.0854214	0.057683	-0.0067711	0
chr7:33041882-33041923	-0.330592	0.1909	-0.330592	0.1909	0	0
chr7:33041882-33041923	-0.330592	0.1909	-0.13363	0.1909	0.196962	0
chr7:56031639-56031680	-0.0917069	0.057981	-0.203696	0.057981	-0.111989	0
chr7:56031639-56031680	-0.0917069	0.057981	-0.0168358	0.089981	0.0748711	0.032
chr7:99735305-99735346	-0.0831907	0.073126	-0.0356349	0.073126	0.0475558	0
chr7:99735305-99735346	-0.0831907	0.073126	-0.090737	0.073126	-0.0075463	0
chr7:99735305-99735346	-0.0831907	0.073126	-0.0334909	0.10093	0.0496998	0.027804
chr7:99735354-99735395	-0.0228016	0.082035	-0.0197048	0.083114	0.0030968	0.001079
chr7:101171459-101171500	-0.107928	0.11456	-0.0934597	0.11456	0.0144683	0
chr7:101172515-101172556	-0.0509123	0.07716	-0.0509123	0.07716	0	0
chr7:101172515-101172556	-0.0509123	0.07716	-0.0036714	0.07716	0.0472409	0
chr7:101174600-101174641	-0.0837091	0.073126	-0.0837091	0.073126	0	0
chr7:101174600-101174641	-0.0837091	0.073126	-0.0745067	0.073126	0.0092024	0
chr8:18414847-18414888	-0.149932	0.071979	-0.149932	0.071979	0	0
chr8:18414847-18414888	-0.149932	0.071979	-0.134897	0.064433	0.015035	-0.007546
chr8:18414974-18415015	0.0907717	0.061102	0.0907717	0.061102	0	0
chr8:18415005-18415046	-0.050632	0.10335	-0.050632	0.10335	0	0
chr8:18415005-18415046	-0.050632	0.10335	0.158984	0.10335	0.209616	0
chr8:18415105-18415146	0.0786013	0.21648	0.0786013	0.21648	0	0
chr8:18415105-18415146	0.0786013	0.21648	0.0295446	0.21648	-0.0490567	0
chr8:49062161-49062202	-0.0540611	0.071979	-0.116219	0.066469	-0.0621579	-0.00551
chr8:144058318-144058359	-0.172346	0.071979	-0.111815	0.071979	0.060531	0
chr8:144058318-144058359	-0.172346	0.071979	-0.148043	0.071979	0.024303	0
chr2:54597658-54597699	-0.275728	0.044138	-0.294198	0.044138	-0.01847	0
chr2:105488379-105488420	-0.0602444	0.069202	-0.124253	0.069202	-0.0640086	0
chr2:133568494-133568535	0.0336175	0.070615	-0.0578664	0.070615	-0.0914839	0
chr2:144696381-144696422	0.192564	0.081008	0.0911182	0.081008	-0.101446	0
chr2:191858382-191858423	-0.0288852	0.046846	-0.021407	0.16512	0.0074782	0.118274
chr2:219549277-219549318	0.0529156	0.16512	0.056119	0.16512	0.0032034	0
chr3:14234239-14234280	0.180797	0.1062	0.0629876	0.1062	-0.117809	0
chr3:24423569-24423610	-0.000784	0.074664	-0.071653	0.074664	-0.0708685	0
chr3:42061533-42061574	0.00541516	0.067202	0.0614186	0.073842	0.0560034	0.00664
chr3:49128616-49128657	0.364842	0.24459	0.317127	0.24459	-0.047715	0
chr3:153282283-153282324	-0.0487298	0.07716	-0.0955518	0.07716	-0.046822	0
chr5:125008138-125008179	-0.143677	0.05493	-0.262883	0.047573	-0.119206	-0.007357
chr3:192655952-192655993	0.0472268	0.079685	0.0310567	0.079685	-0.0161701	0
chr5:174352186-174352227	-0.0041752	0.073126	0.0531028	0.075809	0.057278	0.002683
chr6:7527016-7527057	-0.23451	0.07716	-0.24974	0.07716	-0.01523	0
chr6:7527016-7527057	-0.23451	0.07716	-0.216258	0.07716	0.018252	0
chr4:80280874-80280915	0.0756399	0.15747	0.0377044	0.15747	-0.0379355	0
chr4:80280874-80280915	0.0756399	0.15747	-0.0772492	0.15747	-0.152889	0
chr6:22569940-22569981	-0.0204574	0.063879	-0.0496742	0.063879	-0.0292168	0
chr5:1054062-1054103	0.0501945	0.073126	0.0578412	0.073126	0.0076467	0
chr5:32629293-32629334	-0.0296836	0.068819	0.175062	0.24459	0.204746	0.175771
chr5:45864721-45864762	-0.0746218	0.081794	-0.0456691	0.094481	0.0289527	0.012687
chr5:93119929-93119970	-0.157257	0.081338	-0.165813	0.081338	-0.008556	0
chr5:111710625-111710666	-0.426455	0.091992	-0.247091	0.091992	0.179364	0
chr3:172082446-172082487	0.0560128	0.060305	-0.142142	0.05832	-0.198155	-0.001985
chr3:172082446-172082487	0.0560128	0.060305	0.0560128	0.060305	0	0
chr5:171441598-171441639	0.000396	0.08599	-0.0493357	0.078123	-0.0497313	-0.007867
chr4:55256918-55256959	0.126054	0.1062	0.0746322	0.1062	-0.0514218	0
chr4:61544063-61544104	-0.129169	0.087265	-0.0800341	0.066283	0.0491349	-0.020982
chr6:18227295-18227336	-0.0976438	0.16703	-0.0976438	0.16703	0	0
chr4:94585043-94585084	-0.0710975	0.057938	-0.0710975	0.057938	0	0
chr6:36678171-36678212	-0.0665084	0.087265	0.000424	0.087265	0.0669326	0
chr6:36678171-36678212	-0.0665084	0.087265	0.026243	0.087265	0.0927514	0
chr8:124847555-124847596	-0.0688679	0.073126	-0.0779007	0.073126	-0.0090328	0
chr8:140996079-140996120	-0.599447	0.053014	-0.559927	0.053014	0.03952	0
chr9:70867711-70867752	-0.167164	0.057914	-0.126983	0.064866	0.040181	0.006952
chr9:82520980-82521021	-0.183579	0.064433	-0.164447	0.064433	0.019132	0
chr9:82520980-82521021	-0.183579	0.064433	-0.0725489	0.10335	0.11103	0.038917
chr9:131328138-131328179	-0.0131882	0.059259	-0.0847008	0.057981	-0.0715126	-0.001278
chr10:49302341-49302382	0.0345739	0.099993	0.0345739	0.099993	0	0
chr10:61434798-61434839	0.472679	0.24888	0.587249	0.24673	0.11457	-0.00215
chr6:41691131-41691172	-0.166076	0.071979	-0.22717	0.055093	-0.061094	-0.016886
chr6:46484862-46484903	0.035766	0.15134	-0.0233904	0.065348	-0.0591564	-0.085992
chr6:113657033-113657074	-0.371241	0.077964	-0.371241	0.077964	0	0
chr18:75423999-75424040	-0.101343	0.10335	-0.0465919	0.10335	0.0547511	0
chr8:38442086-38442127	-0.182662	0.036755	-0.189542	0.036755	-0.00688	0
chr3:8678245-8678286	0.0651673	0.082031	0.0304669	0.1094	-0.0347004	0.027369
chr19:55856098-55856139	-0.113099	0.082035	-0.113099	0.082035	0	0
chr19:1095317-1095358	-0.0743384	0.073126	-0.0849425	0.073126	-0.0106041	0
chr1:105395820-105395861	-0.404436	0.078123	-0.426968	0.078123	-0.022532	0
chr10:95558180-95558221	-0.0719956	0.071979	-0.0480611	0.071979	0.0239345	0
chr11:24997803-24997844	-0.334397	0.081794	-0.371257	0.054615	-0.03686	-0.027179
chr11:45672414-45672455	-0.232756	0.064792	-0.030389	0.060086	0.202367	-0.004706
chr13:63231563-63231604	-0.0604424	0.1094	-0.153031	0.068177	-0.0925886	-0.041223
chr13:96859663-96859704	0.0553002	0.12432	-0.0702778	0.12432	-0.125578	0
chr16:65377853-65377894	0.124372	0.15134	0.129366	0.15134	0.004994	0
chr18:69268392-69268433	0.0253828	0.082031	-0.0185108	0.082031	-0.0438936	0
chr22:43499302-43499343	-0.152004	0.07716	-0.158	0.075069	-0.005996	-0.002091
chr3:120312073-120312114	-0.0997191	0.073126	-0.122406	0.073126	-0.0226869	0
chr3:143236567-143236608	-0.109942	0.075272	-0.109942	0.075272	0	0
chr5:178734156-178734197	0.629153	0.081939	0.481304	0.081939	-0.147849	0
chr6:23777584-23777625	0.425022	0.14744	0.425022	0.14744	0	0
chr8:8924037-8924078	-0.0808593	0.049397	-0.0808593	0.049397	0	0
chr12:91843357-91843398	-0.0283947	0.050925	-0.0981053	0.04609	-0.0697106	-0.004835
chr16:53786571-53786612	-0.0949718	0.074884	0.0247573	0.074884	0.119729	0
chr1:65953384-65953425	0.229686	0.13283	0.237103	0.13283	0.007417	0
chr1:71303762-71303803	0.0603864	0.049391	0.0603864	0.049391	0	0
chr1:73385984-73386025	0.459594	0.11625	0.512318	0.11625	0.052724	0
chr1:174321623-174321664	-0.242325	0.045886	-0.242325	0.045886	0	0
chr1:210043581-210043622	-0.0490186	0.053407	0.0859809	0.10335	0.134999	0.049943
chr2:44071616-44071657	-0.448567	0.061251	-0.36334	0.061251	0.085227	0
chr2:44915514-44915555	-0.0835312	0.073126	-0.0642082	0.073126	0.019323	0
chr2:44915514-44915555	-0.0835312	0.073126	-0.0758412	0.073126	0.00769	0
chr2:57808336-57808377	0.0614189	0.10157	0.0614189	0.10157	0	0
chr2:63042449-63042490	0.00641944	0.16459	-0.0539806	0.088537	-0.0604	-0.076053
chr2:63042449-63042490	0.00641944	0.16459	-0.0557192	0.082035	-0.0621386	-0.082555
chr2:143467626-143467667	0.741372	0.14744	0.741372	0.14744	0	0
chr2:226314894-226314935	-0.126807	0.10094	-0.126807	0.10094	0	0
chr3:85475000-85475041	0.214041	0.17246	0.121819	0.17246	-0.092222	0
chr3:155617035-155617076	0.264088	0.075272	0.314534	0.068819	0.050446	-0.006453
chr4:3248081-3248122	-0.0471163	0.073126	-0.070801	0.04949	-0.0236847	-0.023636
chr4:3248081-3248122	-0.0471163	0.073126	-0.039401	0.04949	0.0077153	-0.023636
chr4:39420684-39420725	-0.339062	0.054028	-0.38502	0.054028	-0.045958	0
chr4:46938339-46938380	-0.12182	0.068037	-0.0982517	0.068037	0.0235683	0
chr4:99307839-99307880	-0.102844	0.09888	-0.106076	0.08599	-0.003232	-0.01289
chr4:99332531-99332572	-0.052916	0.060305	0.024005	0.085835	0.076921	0.02553
[truncated: 233,773+ more rows]

## Sheet: TBX5 GWAS Scores
coordinate	gkm_ref_score_ref	minseq_ref_score_ref	gkm_alt_score_alt	minseq_alt_score_alt	delta_gkm	delta_minseq
chr18:3066627-3066668	0.210304	0.24488	0.296912	0.24488	0.086608	0
chr8:11213528-11213569	-0.254881	0.074925	-0.197789	0.074925	0.057092	0
chr19:44908664-44908705	0.0326867	0.12802	-0.0435917	0.12802	-0.0762784	0
chr19:44908664-44908705	0.0326867	0.12802	-0.0978151	0.12802	-0.130502	0
chr1:150598653-150598694	0.547696	0.11232	0.472499	0.13963	-0.075197	0.02731
chr12:95634077-95634118	-0.148246	0.073062	-0.237917	0.073062	-0.089671	0
chr16:86575676-86575717	0.0837133	0.17792	0.0585923	0.17792	-0.025121	0
chr1:88820970-88821011	-0.362983	0.060998	-0.351615	0.060998	0.011368	0
chr17:19313928-19313969	-0.371152	0.082669	-0.258677	0.12481	0.112475	0.042141
chr10:122473645-122473686	-0.118848	0.096779	-0.100424	0.077065	0.018424	-0.019714
chr1:234496603-234496644	-0.226617	0.067951	-0.266812	0.067951	-0.040195	0
chr6:31511189-31511230	-0.208965	0.078521	-0.208965	0.078521	0	0
chr6:31511189-31511230	-0.208965	0.078521	-0.153401	0.078521	0.055564	0
chr1:155908295-155908336	0.238975	0.24198	0.0686648	0.24198	-0.17031	0
chr17:70298830-70298871	0.259449	0.089992	-0.164202	0.078521	-0.423651	-0.011471
chr6:85002638-85002679	-0.0446439	0.070758	-0.118378	0.070758	-0.0737341	0
chr3:21790428-21790469	0.159039	0.081316	0.159039	0.081316	0	0
chr10:125990643-125990684	-0.329784	0.054352	-0.329784	0.054352	0	0
chr22:45419676-45419717	-0.249809	0.38786	-0.472643	0.27482	-0.222834	-0.11304
chr2:55646230-55646271	0.0429863	0.12155	-0.0045518	0.12155	-0.0475381	0
chr9:111295175-111295216	0.135258	0.12942	0.135258	0.12942	0	0
chr10:18423301-18423342	-0.176185	0.17677	-0.103401	0.17677	0.072784	0
chr6:27771581-27771622	-0.0396661	0.1128	-0.0723188	0.1128	-0.0326527	0
chr9:111022257-111022298	-0.101139	0.054585	-0.101139	0.054585	0	0
chr6:142242085-142242126	-0.613702	0.25142	-0.430672	0.25142	0.18303	0
chr18:52693130-52693171	-0.33225	0.052296	-0.279532	0.052296	0.052718	0
chr12:109799946-109799987	0.66056	0.26757	0.42758	0.26757	-0.23298	0
chr3:171878799-171878840	-0.155757	0.1128	-0.155757	0.1128	0	0
chr18:44857329-44857370	-0.0913282	0.22254	-0.139102	0.22254	-0.0477738	0
chr5:72981877-72981918	-0.00737775	0.10465	0.129861	0.15293	0.137239	0.04828
chr6:1366600-1366641	-0.123912	0.074003	-0.166403	0.074003	-0.042491	0
chr10:11762433-11762474	-0.225469	0.21875	-0.198125	0.21875	0.027344	0
chr2:187163570-187163611	-0.147193	0.11846	-0.042105	0.11846	0.105088	0
chr2:187163570-187163611	-0.147193	0.11846	-0.136932	0.11846	0.010261	0
chr17:45066830-45066871	-0.220725	0.22242	-0.210829	0.16559	0.009896	-0.05683
chr2:55900936-55900977	-0.146407	0.067951	-0.165375	0.075536	-0.018968	0.007585
chr2:55900936-55900977	-0.146407	0.067951	-0.106668	0.067951	0.039739	0
chr2:42905064-42905105	0.108294	0.39984	0.101891	0.39984	-0.006403	0
chr16:87193771-87193812	-0.244898	0.090753	-0.244898	0.090753	0	0
chr16:87193771-87193812	-0.244898	0.090753	-0.273655	0.090753	-0.028757	0
chr16:51408748-51408789	-0.289468	0.059003	-0.111979	0.10137	0.177489	0.042367
chr16:51408748-51408789	-0.289468	0.059003	-0.289468	0.059003	0	0
chr14:91418291-91418332	-0.142643	0.12606	-0.0996348	0.12606	0.0430082	0
chr14:91418291-91418332	-0.142643	0.12606	-0.142643	0.12606	0	0
chr5:61387276-61387317	-0.24381	0.065421	-0.369314	0.065421	-0.125504	0
chr17:75894262-75894303	-0.158012	0.2133	-0.23849	0.22242	-0.080478	0.00912
chr17:75894262-75894303	-0.158012	0.2133	-0.261463	0.056687	-0.103451	-0.156613
chr2:55907944-55907985	-0.0830209	0.24745	-0.0710955	0.31412	0.0119254	0.06667
chr2:55907944-55907985	-0.0830209	0.24745	-0.0372046	0.24745	0.0458163	0
chr17:45058915-45058956	-0.119071	0.075536	-0.135586	0.075536	-0.016515	0
chr16:87199559-87199600	-0.0664598	0.11953	-0.0664598	0.11953	0	0
chr6:150697753-150697794	-0.218137	0.081233	-0.218137	0.081233	0	0
chr3:183645455-183645496	-0.261373	0.1254	-0.261373	0.1254	0	0
chr10:103699338-103699379	0.135345	0.39984	0.135345	0.39984	0	0
chr10:103699338-103699379	0.135345	0.39984	-0.0521362	0.25421	-0.187481	-0.14563
chr2:42893589-42893630	-0.167115	0.052296	-0.267551	0.052296	-0.100436	0
chr2:203144314-203144355	0.126294	0.90485	0.126294	0.90485	0	0
chr10:103850548-103850589	-0.211542	0.10478	-0.242252	0.10478	-0.03071	0
chr5:83563226-83563267	-0.420364	0.052371	-0.324656	0.052371	0.095708	0
chr5:122182663-122182704	-0.296652	0.16996	-0.171067	0.16996	0.125585	0
chr2:187300419-187300460	-0.230541	0.073019	-0.248793	0.073019	-0.018252	0
chr2:187300419-187300460	-0.230541	0.073019	-0.221277	0.073019	0.009264	0
chr14:91415023-91415064	0.00203674	0.10355	0.00203674	0.10355	0	0
chr14:91415023-91415064	0.00203674	0.10355	-0.286871	0.10355	-0.288908	0
chr8:8322103-8322144	-0.0952293	0.14423	-0.121767	0.14423	-0.0265377	0
chr13:110390942-110390983	-0.0217303	0.22254	-0.00274364	0.22254	0.0189867	0
chr13:110390942-110390983	-0.0217303	0.22254	0.0467114	0.22254	0.0684417	0
chr14:100159545-100159586	-0.105329	0.096485	-0.177251	0.096485	-0.071922	0
chr1:214963859-214963900	-0.156401	0.069946	-0.293746	0.069946	-0.137345	0
chr17:64990423-64990464	-0.714801	0.072336	-0.704288	0.072336	0.010513	0
chr6:125622070-125622111	-0.365996	0.073062	-0.533857	0.073062	-0.167861	0
chr1:214968207-214968248	-0.0329574	0.08503	-0.0515355	0.08503	-0.0185781	0
chr22:24206488-24206529	-0.67197	0.13145	-0.418813	0.13145	0.253157	0
chr12:95106839-95106880	0.178441	0.26757	0.673924	0.26757	0.495483	0
chr5:56799739-56799780	-0.415938	0.2624	-0.415938	0.2624	0	0
chr5:76665123-76665164	-0.185879	0.090212	-0.198376	0.090212	-0.012497	0
chr5:76668662-76668703	-0.0657298	0.054354	-0.11849	0.063493	-0.0527602	0.009139
chr5:76668662-76668703	-0.0657298	0.054354	-0.104793	0.054354	-0.0390632	0
chr5:76701064-76701105	-0.165238	0.075186	-0.221036	0.10465	-0.055798	0.029464
chr5:76701064-76701105	-0.165238	0.075186	-0.197306	0.075186	-0.032068	0
chr5:77662999-77663040	-0.0631222	0.21376	-0.012562	0.21376	0.0505602	0
chr5:77763156-77763197	-0.373001	0.2133	-0.287739	0.2133	0.085262	0
chr5:77795083-77795124	0.302528	0.13586	0.173471	0.13586	-0.129057	0
chr5:88884359-88884400	-0.192558	0.2133	-0.206987	0.2133	-0.014429	0
chr5:88884359-88884400	-0.192558	0.2133	-0.192558	0.2133	0	0
chr5:89456127-89456168	0.231681	0.26757	0.163935	0.26757	-0.067746	0
chr5:111726130-111726171	-0.144394	0.077065	-0.201276	0.077065	-0.056882	0
chr5:111726130-111726171	-0.144394	0.077065	-0.203452	0.077065	-0.059058	0
chr5:122865319-122865360	-0.0920783	0.054883	-0.0920783	0.054883	0	0
chr5:132371717-132371758	-0.241971	0.096166	-0.241971	0.096166	0	0
chr5:134159370-134159411	0.0109388	0.12117	-0.0720857	0.12117	-0.0830245	0
chr5:134501310-134501351	-0.0899818	0.075536	0.237597	0.15355	0.327579	0.078014
chr5:134501310-134501351	-0.0899818	0.075536	-0.0899818	0.075536	0	0
chr5:135356534-135356575	-0.283685	0.054585	-0.283685	0.054585	0	0
chr5:136148235-136148276	0.163659	0.085182	0.185714	0.085182	0.022055	0
chr5:141322473-141322514	-0.340465	0.076064	-0.340465	0.076064	0	0
chr5:141500094-141500135	-0.326631	0.19354	-0.314763	0.22242	0.011868	0.02888
chr5:141500094-141500135	-0.326631	0.19354	-0.240578	0.19354	0.086053	0
chr5:141554495-141554536	0.111172	0.086876	0.111172	0.086876	0	0
chr5:142012872-142012913	0.0759826	0.22067	-0.0250643	0.22067	-0.101047	0
chr5:158819622-158819663	0.00290406	0.10352	0.00290406	0.10352	0	0
chr5:159208074-159208115	-0.223159	0.077287	-0.223159	0.077287	0	0
chr5:159208074-159208115	-0.223159	0.077287	-0.152249	0.077287	0.07091	0
chr5:160168867-160168908	-1.05481	0.27482	-0.722321	0.27482	0.332489	0
chr5:160206654-160206695	-0.0221966	0.096779	-0.0221966	0.096779	0	0
chr5:178179398-178179439	-0.00316314	0.076179	-0.00474541	0.076179	-0.00158227	0
chr5:178179398-178179439	-0.00316314	0.076179	-0.0165204	0.076179	-0.0133573	0
chr6:3280951-3280992	-0.229253	0.10502	-0.0579014	0.10502	0.171352	0
chr6:3442734-3442775	-0.147595	0.065822	-0.164576	0.065822	-0.016981	0
chr6:3446009-3446050	-0.439477	0.078521	-0.439477	0.078521	0	0
chr6:11543089-11543130	-0.152242	0.11549	-0.242625	0.11549	-0.090383	0
chr6:11543089-11543130	-0.152242	0.11549	-0.165072	0.11549	-0.01283	0
chr6:22904788-22904829	0.00624643	0.1501	0.109956	0.1501	0.10371	0
chr6:25296358-25296399	-0.479148	0.048122	-0.389765	0.046812	0.089383	-0.00131
chr6:25521673-25521714	-0.171963	0.2133	-0.244792	0.2133	-0.072829	0
chr6:25548802-25548843	0.0116399	0.11953	-0.0782215	0.11953	-0.0898614	0
chr6:29929332-29929373	0.326589	0.38786	0.158169	0.15595	-0.16842	-0.23191
chr6:30137357-30137398	-0.00971476	0.11502	-0.0827013	0.11502	-0.0729865	0
chr6:30756245-30756286	-0.183034	0.041273	-0.235786	0.062071	-0.052752	0.020798
chr6:31251187-31251228	-0.148035	0.27442	-0.113782	0.27442	0.034253	0
chr6:31271721-31271762	-0.125629	0.056687	-0.125629	0.056687	0	0
chr6:31432495-31432536	-0.137851	0.14511	-0.137851	0.14511	0	0
chr6:31423604-31423645	-0.170317	0.11451	-0.0792319	0.1128	0.0910851	-0.00171
chr6:31423604-31423645	-0.170317	0.11451	-0.108528	0.073131	0.061789	-0.041379
chr6:31452441-31452482	-0.200213	0.38786	1.3e-05	0.38786	0.200226	0
chr6:31615515-31615556	-0.104974	0.056502	-0.099309	0.056502	0.005665	0
chr6:31724589-31724630	-0.158598	0.10502	-0.11135	0.10502	0.047248	0
chr6:33584405-33584446	-0.406232	0.059785	-0.382582	0.061729	0.02365	0.001944
chr6:34938371-34938412	-0.341568	0.12908	-0.341568	0.12908	0	0
chr6:34938371-34938412	-0.341568	0.12908	-0.257235	0.12908	0.084333	0
chr6:36458293-36458334	0.356559	0.30159	0.16571	0.30159	-0.190849	0
chr6:36526288-36526329	-0.00531886	0.073062	0.0929227	0.10268	0.0982416	0.029618
chr6:36556797-36556838	-0.521224	0.10352	-0.521224	0.10352	0	0
chr6:36556797-36556838	-0.521224	0.10352	-0.595901	0.10268	-0.074677	-0.00084
chr6:36755138-36755179	-0.202147	0.12242	-0.158064	0.12242	0.044083	0
chr7:5489434-5489475	-1.05809	0.096243	-1.05809	0.096243	0	0
chr7:6462716-6462757	-0.246371	0.19354	-0.184312	0.085019	0.062059	-0.108521
chr7:6462716-6462757	-0.246371	0.19354	-0.102535	0.073019	0.143836	-0.120521
chr7:16658622-16658663	0.840263	2.7258	0.789954	2.7258	-0.050309	0
chr7:16658622-16658663	0.840263	2.7258	0.840263	2.7258	0	0
chr7:17972614-17972655	0.176366	0.12117	0.121392	0.12117	-0.054974	0
chr7:37396096-37396137	-0.142749	0.10478	-0.142749	0.10478	0	0
chr7:37417736-37417777	-0.939656	0.10355	-0.939656	0.10355	0	0
chr7:37417736-37417777	-0.939656	0.10355	-0.544093	0.10355	0.395563	0
chr7:44857803-44857844	0.969428	1.0123	0.565642	1.0123	-0.403786	0
chr7:50304461-50304502	-0.0442497	0.3049	-0.0600254	0.3049	-0.0157757	0
chr7:73626464-73626505	-0.608307	0.057106	-0.608307	0.057106	0	0
chr7:73626464-73626505	-0.608307	0.057106	-0.676178	0.057106	-0.067871	0
chr7:73734952-73734993	-0.494515	0.10502	-0.564319	0.08222	-0.069804	-0.0228
chr7:73734952-73734993	-0.494515	0.10502	-0.466554	0.08222	0.027961	-0.0228
chr7:76140652-76140693	-0.17775	0.04624	-0.17775	0.04624	0	0
chr7:80586869-80586910	-0.428678	0.17792	-0.519885	0.17792	-0.091207	0
chr7:80586869-80586910	-0.428678	0.17792	-0.428895	0.17792	-0.000217	0
chr7:100664274-100664315	-0.375847	0.070758	-0.375847	0.070758	0	0
chr7:101856630-101856671	-0.167638	0.071798	-0.167638	0.071798	0	0
chr7:101856630-101856671	-0.167638	0.071798	-0.0757598	0.071798	0.0918782	0
chr7:106731753-106731794	-0.18523	0.17792	-0.213324	0.17792	-0.028094	0
chr7:106731753-106731794	-0.18523	0.17792	-0.0953744	0.17792	0.0898556	0
chr7:116884438-116884479	-0.169078	0.059608	-0.169078	0.059608	0	0
chr7:123765987-123766028	-0.289273	0.062756	-0.23398	0.054883	0.055293	-0.007873
chr7:123799008-123799049	-0.228619	0.052695	-0.196154	0.052695	0.032465	0
chr7:129571628-129571669	-0.182138	2.6855	0.00966116	2.6855	0.191799	0
chr7:129571628-129571669	-0.182138	2.6855	-0.0587381	2.6855	0.1234	0
chr7:130016016-130016057	-0.177978	0.073547	-0.135546	0.073547	0.042432	0
chr7:134315973-134316014	-0.247553	0.042715	-0.448343	0.042715	-0.20079	0
chr7:135661494-135661535	-0.127281	0.079742	-0.134173	0.079742	-0.006892	0
chr7:135661494-135661535	-0.127281	0.079742	-0.0337259	0.08503	0.0935551	0.005288
chr7:135972186-135972227	-0.0576136	0.086504	-0.0576136	0.086504	0	0
chr7:68130501-68130542	-0.0780545	0.07589	-0.14351	0.057444	-0.0654555	-0.018446
chr3:184509775-184509816	-0.265329	0.070758	-0.217549	0.059608	0.04778	-0.01115
chr7:64752120-64752161	0.158029	0.10422	0.140428	0.10422	-0.017601	0
chr12:62466997-62467038	0.0387717	0.19168	0.0723997	0.19168	0.033628	0
chr14:73423228-73423269	0.69411	2.7258	0.732666	2.7258	0.038556	0
chr4:69591283-69591324	-0.23362	0.076179	-0.23865	0.076179	-0.00503	0
chr5:35045620-35045661	-0.184177	0.068129	-0.184177	0.068129	0	0
chr5:35045620-35045661	-0.184177	0.068129	-0.175493	0.068129	0.008684	0
chr12:242281-242322	-0.330737	0.057742	-0.338259	0.10465	-0.007522	0.046908
chr12:242281-242322	-0.330737	0.057742	-0.320758	0.057742	0.009979	0
chr5:151314325-151314366	-0.196543	0.096779	-0.172834	0.11502	0.023709	0.018241
chr19:32865965-32866006	-0.09647	0.12908	-0.168214	0.13478	-0.071744	0.0057
chr19:32865965-32866006	-0.09647	0.12908	-0.09647	0.12908	0	0
chr2:73641181-73641222	-0.209718	0.090212	-0.251371	0.090212	-0.041653	0
chr2:73641181-73641222	-0.209718	0.090212	-0.209718	0.090212	0	0
chr9:133269995-133270036	-0.612389	0.057803	-0.612389	0.057803	0	0
chr9:133269995-133270036	-0.612389	0.057803	-0.497195	0.057803	0.115194	0
chr11:81225187-81225228	-0.174254	0.40673	-0.064038	0.40673	0.110216	0
chr10:98388399-98388440	-0.235787	0.046125	-0.196947	0.10465	0.03884	0.058525
chr10:98388399-98388440	-0.235787	0.046125	-0.252984	0.046125	-0.017197	0
chr22:43928827-43928868	-0.100074	0.069366	-0.0974144	0.043601	0.0026596	-0.025765
chr22:43928827-43928868	-0.100074	0.069366	0.0323444	0.081316	0.132418	0.01195
chr21:34977904-34977945	-0.701198	0.073062	-0.640089	0.073062	0.061109	0
chr21:37451249-37451290	-0.206714	0.081163	-0.206588	0.081163	0.000126	0
chr21:38466092-38466133	-0.138896	0.089992	-0.130056	0.081163	0.00884	-0.008829
chr21:43559770-43559811	-0.733795	0.13478	-0.733795	0.13478	0	0
chr21:44849591-44849632	-0.16642	0.082627	-0.203556	0.082627	-0.037136	0
chr21:46484652-46484693	0.0489851	0.081233	0.0489851	0.081233	0	0
chr22:24375967-24376008	-0.150849	0.085158	0.1326	0.11953	0.283449	0.034372
chr22:27614955-27614996	-0.211329	0.099363	-0.203225	0.099363	0.008104	0
chr22:27785391-27785432	-0.08936	0.16542	-0.00911176	0.16542	0.0802482	0
chr22:27785391-27785432	-0.08936	0.16542	-0.08936	0.16542	0	0
chr22:28707209-28707250	-0.229748	0.078607	-0.175646	0.078607	0.054102	0
chr22:30042438-30042479	-0.27829	0.16841	-0.239893	0.077429	0.038397	-0.090981
chr22:30673473-30673514	0.0627961	0.24745	0.0192287	0.22582	-0.0435674	-0.02163
chr22:30687244-30687285	-0.0169474	0.15246	-0.0376732	0.15246	-0.0207258	0
chr22:32475220-32475261	-0.0265958	0.079688	-0.0174267	0.12242	0.0091691	0.042732
chr22:32503038-32503079	-0.148086	0.15246	-0.0940096	0.15246	0.0540764	0
chr22:36281848-36281889	-0.205946	0.066518	-0.201929	0.066518	0.004017	0
chr22:36362482-36362523	-0.124816	0.090753	-0.171782	0.090753	-0.046966	0
chr22:36362482-36362523	-0.124816	0.090753	-0.17659	0.090753	-0.051774	0
chr22:38728887-38728928	-0.171608	0.10638	-0.162185	0.10638	0.009423	0
chr22:41403743-41403784	-0.174199	0.041273	-0.151237	0.041273	0.022962	0
chr22:50511362-50511403	0.307982	0.24488	0.307982	0.24488	0	0
chr22:50526413-50526454	-0.233241	0.072336	-0.184484	0.072336	0.048757	0
chr22:50532817-50532858	-0.183105	0.14616	-0.148573	0.067599	0.034532	-0.078561
chr22:50532817-50532858	-0.183105	0.14616	-0.206246	0.067599	-0.023141	-0.078561
chr22:50532817-50532858	-0.183105	0.14616	-0.215929	0.067599	-0.032824	-0.078561
chr22:50554776-50554817	-0.52611	0.11449	-0.52611	0.11449	0	0
chrX:1466166-1466207	-0.273716	0.065403	-0.207945	0.19902	0.065771	0.133617
chr19:17114298-17114339	-0.0736076	0.2133	-0.0952827	0.2133	-0.0216751	0
chr19:17114298-17114339	-0.0736076	0.2133	-0.0736076	0.2133	0	0
chr19:17141211-17141252	-0.206657	0.11232	-0.181391	0.11232	0.025266	0
chr19:17142144-17142185	-0.77111	0.04908	-0.869188	0.04908	-0.098078	0
chr19:17999745-17999786	-0.218105	0.077287	-0.325468	0.077287	-0.107363	0
chr19:18304914-18304955	-0.101549	0.096243	-0.101549	0.096243	0	0
chr19:19367193-19367234	0.00603885	0.91853	0.00603885	0.91853	0	0
chr19:19367193-19367234	0.00603885	0.91853	0.0790165	0.91853	0.0729777	0
chr19:32581159-32581200	-0.134702	0.12802	-0.134702	0.12802	0	0
chr19:32581159-32581200	-0.134702	0.12802	-0.125216	0.12802	0.009486	0
chr19:32582505-32582546	0.0867771	0.11506	0.18921	0.12242	0.102433	0.00736
chr19:32582505-32582546	0.0867771	0.11506	0.2782	0.22162	0.191423	0.10656
chr19:33249365-33249406	-0.30899	0.078387	-0.263334	0.078387	0.045656	0
chr19:33263622-33263663	-0.0522531	0.089992	-0.0785281	0.089992	-0.026275	0
chr19:33263622-33263663	-0.0522531	0.089992	-0.0522531	0.089992	0	0
chr19:33264438-33264479	-0.161843	0.089642	-0.161843	0.089642	0	0
chr19:33264438-33264479	-0.161843	0.089642	-0.238929	0.061757	-0.077086	-0.027885
chr19:33358195-33358236	-0.396514	2.6855	-0.373401	2.6855	0.023113	0
chr19:33401483-33401524	-0.310067	0.078521	-0.377133	0.078521	-0.067066	0
chr19:33401483-33401524	-0.310067	0.078521	-0.310067	0.078521	0	0
chr19:35068550-35068591	0.00976407	0.13478	0.032947	0.13478	0.0231829	0
chr19:40344320-40344361	0.175583	0.89972	0.179583	0.89972	0.004	0
chr19:40442141-40442182	-0.0126464	0.08503	-0.0549361	0.08503	-0.0422897	0
chr19:44908802-44908843	-0.153658	0.12802	-0.185812	0.12802	-0.032154	0
chr19:44908802-44908843	-0.153658	0.12802	-0.176593	0.12802	-0.022935	0
chr19:44908802-44908843	-0.153658	0.12802	-0.168974	0.16542	-0.015316	0.0374
chr19:45239857-45239898	-0.141703	0.16559	-0.181658	0.16559	-0.039955	0
chr19:45678114-45678155	-0.105081	0.24198	-0.105081	0.24198	0	0
chr19:45678114-45678155	-0.105081	0.24198	-0.0232487	0.21339	0.0818323	-0.02859
chr19:48629590-48629631	-0.129226	0.054352	-0.167079	0.054352	-0.037853	0
chr19:52922231-52922272	-0.178617	0.21339	-0.178617	0.21339	0	0
chr19:55228425-55228466	-0.223095	0.11549	-0.283804	0.11549	-0.060709	0
chr19:57643437-57643478	-0.223108	0.13368	-0.223108	0.13368	0	0
chr19:58506030-58506071	-0.858439	0.11846	-0.858439	0.11846	0	0
chr20:3767092-3767133	-0.0746553	0.26803	0.0352419	0.26803	0.109897	0
chr20:3797375-3797416	0.00500548	0.17792	-0.0560953	0.17792	-0.0611008	0
chr20:4176405-4176446	0.0659803	0.11112	0.0399316	0.104	-0.0260487	-0.00712
chr20:4176405-4176446	0.0659803	0.11112	0.00524899	0.104	-0.0607313	-0.00712
chr20:31769189-31769230	-0.294346	0.081163	-0.294346	0.081163	0	0
chr20:32552343-32552384	-0.0876921	0.13887	-0.0959833	0.063456	-0.0082912	-0.075414
chr20:32652107-32652148	-0.590206	0.096485	-0.600139	0.096485	-0.009933	0
chr20:37047089-37047130	0.0137167	0.24198	0.0124334	0.13586	-0.0012833	-0.10612
chr20:37047089-37047130	0.0137167	0.24198	0.0261165	0.15355	0.0123998	-0.08843
chr20:39934583-39934624	-0.224643	0.056408	-0.215186	0.096485	0.009457	0.040077
chr20:39934583-39934624	-0.224643	0.056408	-0.224643	0.056408	0	0
chr20:43622782-43622823	0.0582048	0.19354	0.0748843	0.19354	0.0166795	0
chr20:44210801-44210842	-0.113738	0.12802	-0.0962032	0.12802	0.0175348	0
chr20:45941271-45941312	-0.257733	0.10502	-0.174764	0.10502	0.082969	0
chr20:45941271-45941312	-0.257733	0.10502	-0.164111	0.10502	0.093622	0
chr20:48823663-48823704	0.0592212	0.11315	0.0592212	0.11315	0	0
chr20:50483488-50483529	-0.0741626	0.11031	-0.06841	0.11031	0.0057526	0
chr20:53570278-53570319	-0.177625	0.17792	-0.198582	0.13478	-0.020957	-0.04314
chr20:53605547-53605588	-0.818776	0.12606	-0.818776	0.12606	0	0
chr20:53605547-53605588	-0.818776	0.12606	-0.605398	0.12606	0.213378	0
chr20:53937325-53937366	-0.434467	0.052296	-0.564109	0.069366	-0.129642	0.01707
chr20:57413282-57413323	-0.0527294	0.74783	-0.190689	0.094961	-0.13796	-0.652869
chr20:57396733-57396774	-0.622958	0.11449	-0.622958	0.11449	0	0
chr20:57415294-57415335	-0.0197087	0.21875	-0.0508661	0.21875	-0.0311574	0
chr20:57416561-57416602	0.211853	0.2916	0.235061	0.2916	0.023208	0
chr20:57416561-57416602	0.211853	0.2916	0.0421525	0.2916	-0.169701	0
chr20:62105202-62105243	-0.136754	0.081233	-0.117092	0.081233	0.019662	0
chr20:63563714-63563755	-0.68283	0.056687	-0.616239	0.056687	0.066591	0
chr20:63923440-63923481	-0.103712	1.0123	-0.103712	1.0123	0	0
chr20:64080086-64080127	0.062538	0.13795	0.0784338	0.21887	0.0158958	0.08092
chr20:64080086-64080127	0.062538	0.13795	0.062538	0.16252	0	0.02457
chr21:33753972-33754013	-0.247997	0.1325	-0.334451	0.0626	-0.086454	-0.0699
chr21:33753972-33754013	-0.247997	0.1325	-0.247997	0.1325	0	0
chr16:71765836-71765877	-0.194188	0.076064	-0.192863	0.076064	0.001325	0
chr16:73878669-73878710	-0.134467	0.075674	-0.124143	0.075674	0.010324	0
chr16:73878669-73878710	-0.134467	0.075674	-0.103685	0.07589	0.030782	0.000216
chr16:85688183-85688224	0.0565698	0.44931	-0.0604763	0.44931	-0.117046	0
chr17:7830495-7830536	-0.282942	0.22242	-0.187618	0.22242	0.095324	0
chr17:7830495-7830536	-0.282942	0.22242	-0.276906	0.22242	0.006036	0
chr17:31381117-31381158	-0.17143	0.27442	-0.328173	0.080349	-0.156743	-0.194071
chr17:46086937-46086978	-0.704432	0.096243	-0.704432	0.096243	0	0
chr17:80554931-80554972	-0.106404	0.058042	-0.128354	0.058042	-0.02195	0
chr18:55420733-55420774	0.155352	0.1579	0.0446809	0.14616	-0.110671	-0.01174
chr18:55420733-55420774	0.155352	0.1579	0.155352	0.1579	0	0
chr19:48738699-48738740	-0.293474	0.097057	-0.285801	0.077287	0.007673	-0.01977
chr20:18675866-18675907	0.00585583	0.14616	-0.0328282	0.14616	-0.038684	0
chr21:33060725-33060766	-0.231555	0.13795	-0.158053	0.16252	0.073502	0.02457
chr21:33060725-33060766	-0.231555	0.13795	-0.158335	0.16252	0.07322	0.02457
chr22:41420628-41420669	-0.0153699	0.19354	-0.0200667	0.19354	-0.0046968	0
chr22:41420628-41420669	-0.0153699	0.19354	-0.0153699	0.19354	0	0
chr22:46085723-46085764	-0.233891	0.11451	-0.255169	0.11451	-0.021278	0
chr1:65954202-65954243	-0.122994	0.17067	-0.387516	0.076179	-0.264522	-0.094491
chr1:73382907-73382948	-0.165576	0.08325	-0.16702	0.08325	-0.001444	0
chr2:27508053-27508094	-0.223841	0.10478	-0.117404	0.11953	0.106437	0.01475
chr2:27508053-27508094	-0.223841	0.10478	-0.223841	0.10478	0	0
chr2:27508053-27508094	-0.223841	0.10478	-0.0989896	0.10478	0.124851	0
chr2:27508053-27508094	-0.223841	0.10478	-0.129281	0.10478	0.09456	0
chr2:44914021-44914062	-0.0303012	0.10502	-0.0303012	0.10502	0	0
chr2:57815086-57815127	-0.16266	0.083468	-0.16266	0.083468	0	0
chr2:57815086-57815127	-0.16266	0.083468	-0.136666	0.064943	0.025994	-0.018525
chr2:103517954-103517995	-0.0890366	0.10124	-0.0636867	0.12908	0.0253499	0.02784
chr2:137506641-137506682	-0.246392	0.13478	-0.279486	0.13478	-0.033094	0
chr2:226299917-226299958	-0.158205	0.09922	-0.11929	0.09922	0.038915	0
chr3:85464623-85464664	-0.384063	0.069946	-0.285869	0.075532	0.098194	0.005586
chr4:39403232-39403273	0.999609	2.7258	0.854409	2.7258	-0.1452	0
chr4:98792179-98792220	-0.0449551	0.11505	-0.0640666	0.11505	-0.0191115	0
chr4:98792179-98792220	-0.0449551	0.11505	-0.0752774	0.11505	-0.0303223	0
chr4:99107974-99108015	-0.0714526	0.1128	-0.0714526	0.1128	0	0
chr11:8646515-8646556	0.00553724	0.20068	-0.041301	0.20068	-0.0468382	0
chr11:27626804-27626845	-0.000726214	0.11558	-0.0887902	0.11558	-0.088064	0
chr11:27626804-27626845	-0.000726214	0.11558	0.00772895	0.11558	0.00845516	0
chr11:33182593-33182634	-0.201608	0.19168	-0.201608	0.19168	0	0
chr11:46321372-46321413	-0.823189	0.072133	-0.920512	0.052296	-0.097323	-0.019837
chr11:47407674-47407715	-0.0974407	0.14511	-0.0974407	0.14511	0	0
chr11:113493949-113493990	-0.107957	0.073547	-0.107957	0.073547	0	0
chr11:113493949-113493990	-0.107957	0.073547	-0.33477	0.057106	-0.226813	-0.016441
chr11:113767435-113767476	-0.409611	0.11031	-0.511977	0.11031	-0.102366	0
chr11:116220115-116220156	-0.0786001	0.04624	-0.204265	0.040304	-0.125665	-0.005936
chr11:121672195-121672236	0.394783	0.30584	0.350343	0.30584	-0.04444	0
chr11:121672195-121672236	0.394783	0.30584	0.418388	0.30584	0.023605	0
chr12:49869345-49869386	-0.0945275	2.2947	-0.162234	2.2947	-0.0677065	0
chr12:49869345-49869386	-0.0945275	2.2947	-0.170002	2.2947	-0.0754745	0
chr12:51485027-51485068	-0.224933	0.086504	-0.200758	0.086504	0.024175	0
chr12:81214259-81214300	0.303598	1.0123	0.212082	1.0123	-0.091516	0
chr12:87393684-87393725	-0.595189	0.21339	-0.502361	0.21339	0.092828	0
chr12:91679761-91679802	-0.213283	0.099335	-0.226408	0.099335	-0.013125	0
chr13:67514893-67514934	-0.209262	0.080349	-0.159959	0.080349	0.049303	0
chr14:56817230-56817271	-0.151567	0.11449	-0.178468	0.11449	-0.026901	0
chr14:56817230-56817271	-0.151567	0.11449	-0.177931	0.11449	-0.026364	0
chr14:58277014-58277055	-0.0933262	0.40673	-0.0766298	0.22242	0.0166964	-0.18431
chr14:58277014-58277055	-0.0933262	0.40673	-0.0798147	0.22242	0.0135115	-0.18431
chr14:94378590-94378631	-0.252097	0.052761	-0.252097	0.052761	0	0
chr14:94378590-94378631	-0.252097	0.052761	-0.208383	0.052761	0.043714	0
chr15:47392842-47392883	-0.202424	0.061729	-0.150491	0.061729	0.051933	0
chr15:74735519-74735560	-0.0223625	0.081233	-0.120991	0.081233	-0.0986285	0
chr15:74735519-74735560	-0.0223625	0.081233	-0.0505213	0.40673	-0.0281588	0.325497
chr15:86310500-86310541	0.0201618	0.22242	-0.00771296	0.12481	-0.0278748	-0.09761
chr16:24681707-24681748	-0.239081	0.052371	-0.244779	0.051425	-0.005698	-0.000946
chr16:24681707-24681748	-0.239081	0.052371	-0.239081	0.052371	0	0
chr16:28483482-28483523	0.349777	2.6855	0.139291	2.6855	-0.210486	0
chr16:30080707-30080748	-0.989946	0.11449	-0.620274	0.11449	0.369672	0
chr16:53769642-53769683	-0.126057	0.28334	-0.064082	0.28334	0.061975	0
chr16:53769642-53769683	-0.126057	0.28334	-0.109781	0.28334	0.016276	0
chr4:99318142-99318183	0.218908	0.22254	-0.0418791	0.11505	-0.260787	-0.10749
chr4:99318142-99318183	0.218908	0.22254	-0.00686559	0.11505	-0.225774	-0.10749
chr4:99318142-99318183	0.218908	0.22254	0.218908	0.22254	0	0
chr4:99318142-99318183	0.218908	0.22254	-0.02276	0.16383	-0.241668	-0.05871
chr4:99489045-99489086	-0.171795	0.075674	-0.171795	0.075674	0	0
chr4:99963943-99963984	-0.260834	0.057444	-0.248563	0.098056	0.012271	0.040612
chr4:100577873-100577914	-0.348416	0.30159	-0.320109	0.30159	0.028307	0
chr4:102276905-102276946	-0.0876818	0.10137	-0.0876818	0.10137	0	0
chr4:102276905-102276946	-0.0876818	0.10137	-0.00402892	0.10137	0.0836529	0
chr7:153791969-153792010	-0.227313	0.073062	-0.248681	0.11502	-0.021368	0.041958
chr8:56512295-56512336	0.973587	0.26757	0.838335	0.26757	-0.135252	0
chr10:71148174-71148215	0.0849883	0.12898	0.108065	0.12898	0.0230767	0
chr10:108778056-108778097	0.00282285	0.19354	0.01851	0.19354	0.0156871	0
chr10:109006865-109006906	-0.287433	0.060551	-0.164397	0.12942	0.123036	0.068869
chr11:47402350-47402391	0.0756155	0.075674	0.0756155	0.075674	0	0
chr11:57713131-57713172	-0.163718	0.077287	-0.104748	0.077287	0.05897	0
chr12:51510056-51510097	-0.237273	0.21376	-0.199899	0.21376	0.037374	0
chr14:58299165-58299206	0.150569	0.23622	0.22615	0.23622	0.075581	0
chr14:58299165-58299206	0.150569	0.23622	0.150569	0.23622	0	0
chr14:103889526-103889567	-0.146325	0.10478	-0.146325	0.10478	0	0
chr16:53786881-53786922	-0.22924	0.056059	-0.22924	0.056059	0	0
chr19:48703140-48703181	-0.135156	0.12802	-0.190128	0.12802	-0.054972	0
chr19:48703140-48703181	-0.135156	0.12802	-0.131905	0.12802	0.003251	0
chr19:48703140-48703181	-0.135156	0.12802	-0.135156	0.12802	0	0
chr14:102527708-102527749	-0.518611	0.2133	-0.518611	0.2133	0	0
chr14:102527708-102527749	-0.518611	0.2133	-0.455897	0.2133	0.062714	0
chr14:103384915-103384956	-0.140798	0.11315	-0.170921	0.11315	-0.030123	0
chr14:103384915-103384956	-0.140798	0.11315	-0.140798	0.11315	0	0
chr14:105293483-105293524	0.0917967	0.104	0.0615373	0.104	-0.0302594	0
chr15:31260774-31260815	-0.163741	0.1325	-0.156939	0.1325	0.006802	0
chr15:31309864-31309905	-1.02513	0.10355	-0.628754	0.10355	0.396376	0
chr15:36578034-36578075	0.139012	2.7258	-0.0879882	2.6855	-0.227	-0.0403
chr15:40456499-40456540	-0.302597	0.4342	-0.263454	0.4342	0.039143	0
chr15:50442079-50442120	-0.728441	2.6855	-0.311	2.6855	0.417441	0
chr15:51718787-51718828	-0.150774	0.073062	-0.119566	0.073062	0.031208	0
chr15:56253767-56253808	0.0125895	0.10422	0.0140651	0.10422	0.0014756	0
chr15:56253767-56253808	0.0125895	0.10422	0.0125895	0.10422	0	0
chr15:62561866-62561907	-0.145678	0.07478	-0.0913473	0.1579	0.0543307	0.08312
chr15:65457322-65457363	0.0816432	0.094941	-0.102849	0.16052	-0.184492	0.065579
chr15:69436690-69436731	-0.136586	0.063456	-0.123833	0.081163	0.012753	0.017707
chr15:75098686-75098727	-0.338831	0.35878	-0.338831	0.35878	0	0
chr15:75206383-75206424	-0.251169	0.57678	-0.2155	0.57678	0.035669	0
chr15:78244877-78244918	0.0247715	0.21591	-0.0127421	0.24198	-0.0375136	0.02607
chr15:85619672-85619713	-0.0448921	0.14616	-0.0414848	2.2947	0.0034073	2.14854
chr16:120309-120350	-0.289483	0.14117	-0.245723	0.14117	0.04376	0
chr16:120057-120098	0.0817244	0.14942	0.0377011	0.14942	-0.0440233	0
chr16:120057-120098	0.0817244	0.14942	0.0980372	0.14942	0.0163128	0
chr16:182378-182419	0.486211	0.089992	0.486211	0.089992	0	0
chr16:227380-227421	0.000541461	0.11169	0.000541461	0.11169	0	0
chr16:583744-583785	-0.0704038	0.089992	-0.164374	0.089992	-0.0939702	0
chr16:581732-581773	-0.385755	0.61167	-0.413669	0.61167	-0.027914	0
chr11:95153448-95153489	-0.0644603	0.086876	-0.0719201	0.078387	-0.0074598	-0.008489
chr11:95153448-95153489	-0.0644603	0.086876	0.0137029	0.090571	0.0781632	0.003695
chr11:95578076-95578117	-0.0346248	0.11953	-0.0346248	0.11953	0	0
chr11:95578076-95578117	-0.0346248	0.11953	-0.038217	0.078607	-0.0035922	-0.040923
chr11:100623244-100623285	-0.323659	0.085877	-0.381552	0.085877	-0.057893	0
chr11:108475356-108475397	-0.0694194	0.10124	-0.0312165	0.21591	0.0382029	0.11467
chr11:108475356-108475397	-0.0694194	0.10124	-0.0297767	0.13145	0.0396427	0.03021
chr11:108272709-108272750	-0.0917477	0.041166	-0.0233825	0.041166	0.0683652	0
chr11:111774080-111774121	-0.562122	0.056687	-0.562122	0.056687	0	0
chr11:114110499-114110540	-0.275383	0.096243	-0.275383	0.096243	0	0
chr11:114110499-114110540	-0.275383	0.096243	-0.228942	0.096243	0.046441	0
chr11:116778181-116778222	-0.226307	0.067951	-0.25305	0.067951	-0.026743	0
chr11:116778181-116778222	-0.226307	0.067951	-0.263802	0.067951	-0.037495	0
chr11:116778181-116778222	-0.226307	0.067951	-0.23988	0.067951	-0.013573	0
chr11:116778181-116778222	-0.226307	0.067951	-0.226307	0.067951	0	0
chr11:116779559-116779600	-0.150532	0.14616	-0.150532	0.14616	0	0
chr11:116779559-116779600	-0.150532	0.14616	-0.157328	0.14616	-0.006796	0
chr11:117148028-117148069	-0.740372	0.054652	-0.624715	0.054652	0.115657	0
chr11:119097028-119097069	0.0666958	0.27442	-0.175567	0.15355	-0.242263	-0.12087
chr11:119173806-119173847	-0.281447	0.069366	-0.281447	0.069366	0	0
chr11:128067851-128067892	-0.151445	0.077065	-0.158806	0.077065	-0.007361	0
chr12:3962052-3962093	-0.00834176	0.1128	0.0202449	0.1128	0.0285867	0
chr12:4221322-4221363	-0.210588	0.06473	-0.277516	0.062619	-0.066928	-0.002111
chr12:6616351-6616392	-0.281598	0.16383	-0.281598	0.16383	0	0
chr12:7023690-7023731	-0.273095	0.11505	-0.283633	0.11505	-0.010538	0
chr12:8037590-8037631	-0.228475	0.073062	-0.228475	0.073062	0	0
chr12:10444101-10444142	-0.24141	0.070946	-0.24141	0.070946	0	0
chr12:11869542-11869583	-0.124974	0.077287	-0.124974	0.077287	0	0
chr12:12726300-12726341	-0.084091	0.063456	-0.084091	0.063456	0	0
chr12:12726300-12726341	-0.084091	0.063456	-0.0205736	0.052695	0.0635174	-0.010761
chr12:12969114-12969155	-0.275254	0.058211	-0.282806	0.058211	-0.007552	0
chr12:14398455-14398496	-0.373776	0.074003	-0.373776	0.074003	0	0
chr12:21178595-21178636	-0.142823	0.18789	-0.195088	0.1253	-0.052265	-0.06259
chr12:21178595-21178636	-0.142823	0.18789	-0.224617	0.1253	-0.081794	-0.06259
chr12:31964247-31964288	-0.0113478	0.11846	-0.0431059	0.11846	-0.0317581	0
chr12:47784710-47784751	-0.396908	0.086876	-0.206002	0.12802	0.190906	0.041144
chr12:52915965-52916006	-0.239211	0.07589	-0.239211	0.07589	0	0
chr12:53364027-53364068	-0.1551	0.063456	-0.079083	0.080349	0.076017	0.016893
chr12:53364027-53364068	-0.1551	0.063456	-0.1551	0.063456	0	0
chr12:54292076-54292117	-0.15393	0.057999	-0.103382	0.10268	0.050548	0.044681
chr12:54292076-54292117	-0.15393	0.057999	-0.113281	0.095428	0.040649	0.037429
chr12:56752265-56752306	0.0436465	0.11315	0.0436465	0.11315	0	0
chr12:56752265-56752306	0.0436465	0.11315	-0.0197936	0.078387	-0.0634401	-0.034763
chr12:68786129-68786170	-0.173688	0.05973	-0.260005	0.056502	-0.086317	-0.003228
chr12:88417892-88417933	-0.290361	0.10355	-0.134696	0.061757	0.155665	-0.041793
chr12:93413915-93413956	0.624496	1.0123	0.439469	1.0123	-0.185027	0
chr12:93413915-93413956	0.624496	1.0123	0.624496	1.0123	0	0
chr12:111467421-111467462	0.693051	2.6855	0.490265	2.6855	-0.202786	0
chr12:111654638-111654679	-0.0647642	0.10478	-0.0473677	0.10478	0.0173965	0
chr12:112541211-112541252	0.150041	0.19354	0.150041	0.19354	0	0
chr12:120485026-120485067	-0.201339	0.059003	-0.201885	0.059003	-0.000546	0
chr12:120719712-120719753	-0.211601	0.074003	-0.189749	0.074003	0.021852	0
chr12:121739396-121739437	-0.0705676	0.20068	-0.170496	0.20068	-0.0999284	0
chr12:122133422-122133463	-0.24041	0.65628	-0.24041	0.65628	0	0
chr12:122133422-122133463	-0.24041	0.65628	-0.106396	0.65628	0.134014	0
chr12:124020877-124020918	-0.119147	0.062471	-0.0191965	0.062471	0.0999505	0
chr12:124020877-124020918	-0.119147	0.062471	-0.119147	0.062471	0	0
chr12:131949826-131949867	-0.168321	0.072731	-0.183875	0.072731	-0.015554	0
chr12:131949826-131949867	-0.168321	0.072731	-0.193197	0.072731	-0.024876	0
chr12:132720003-132720044	-0.231535	0.06271	-0.226917	0.06271	0.004618	0
chr13:28039836-28039877	-0.213228	0.24745	-0.208533	0.24745	0.004695	0
chr13:30497131-30497172	-0.204944	0.090212	-0.159735	0.071798	0.045209	-0.018414
chr13:40586422-40586463	-0.155294	0.24745	-0.147664	0.24745	0.00763	0
chr13:40586422-40586463	-0.155294	0.24745	-0.155294	0.24745	0	0
chr13:41005653-41005694	-0.194888	0.19354	-0.194888	0.19354	0	0
chr13:70662459-70662500	-0.202713	0.075536	-0.202713	0.075536	0	0
chr13:70662459-70662500	-0.202713	0.075536	-0.144565	0.075536	0.058148	0
chr13:72744981-72745022	-0.255712	0.057024	-0.216052	0.057024	0.03966	0
chr13:75484997-75485038	-0.186049	0.049703	-0.186049	0.049703	0	0
chr13:78438847-78438888	-0.0611373	0.04841	-0.149805	0.054514	-0.0886677	0.006104
chr13:108769758-108769799	-0.38146	0.076064	-0.297299	0.076064	0.084161	0
chr13:109755448-109755489	-0.160754	0.11846	-0.14132	0.11846	0.019434	0
chr13:113255005-113255046	-0.018549	0.087067	-0.0213848	0.087067	-0.0028358	0
chr13:113543184-113543225	-0.0505625	0.21339	-0.0505625	0.21339	0	0
chr13:113843556-113843597	-0.199219	0.078387	-0.141116	0.10352	0.058103	0.025133
chr13:113843556-113843597	-0.199219	0.078387	-0.154925	0.44931	0.044294	0.370923
chr14:24404967-24405008	-0.307434	0.086504	-0.307434	0.089977	0	0.003473
chr14:24404967-24405008	-0.307434	0.086504	-0.402912	0.089977	-0.095478	0.003473
chr14:37218905-37218946	-0.739835	0.096243	-0.739835	0.096243	0	0
chr14:64784018-64784059	0.00283343	0.11115	0.00283343	0.11115	0	0
chr14:64793489-64793530	0.072088	0.15355	0.124098	0.15355	0.05201	0
chr14:64806119-64806160	-0.25336	0.10501	-0.25336	0.10501	0	0
chr14:64816215-64816256	-0.127316	0.071798	-0.127316	0.071798	0	0
chr14:64835240-64835281	-0.0791158	0.078521	-0.0791158	0.078521	0	0
chr14:64878932-64878973	-0.23616	0.073062	-0.0692427	0.09922	0.166917	0.026158
chr14:65020956-65020997	0.453701	2.2947	0.453701	2.2947	0	0
chr14:65020956-65020997	0.453701	2.2947	0.371932	2.2947	-0.081769	0
chr14:67940763-67940804	-0.162317	0.081233	-0.274788	0.081233	-0.112471	0
chr14:69616910-69616951	-0.135625	0.081316	-0.116532	0.09922	0.019093	0.017904
chr14:95536841-95536882	-0.286484	0.058309	-0.286484	0.058309	0	0
chr14:95536841-95536882	-0.286484	0.058309	-0.311002	0.10095	-0.024518	0.042641
chr14:100715524-100715565	0.218173	0.23622	0.18881	0.23622	-0.029363	0
chr11:98216851-98216892	-0.21018	0.2133	-0.21018	0.2133	0	0
chr3:160011848-160011889	-0.13902	0.89972	-0.258235	0.89972	-0.119215	0
chr3:183662227-183662268	-0.0220955	0.099215	0.170144	0.27442	0.192239	0.175205
chr3:183662227-183662268	-0.0220955	0.099215	0.00261337	0.099215	0.0247089	0
chr6:42893988-42894029	-0.448266	0.20272	-0.448266	0.20272	0	0
chr6:42893988-42894029	-0.448266	0.20272	-0.476856	0.20272	-0.02859	0
chr6:44097305-44097346	-0.300242	0.073019	-0.30663	0.073019	-0.006388	0
chr6:46925598-46925639	0.24039	0.89972	0.170541	0.89972	-0.069849	0
chr6:47360661-47360702	-0.0578296	0.10478	-0.211354	0.078387	-0.153524	-0.026393
chr6:47638956-47638997	-0.138905	0.099335	-0.138905	0.099335	0	0
chr6:52304874-52304915	-0.198072	0.06271	-0.235028	0.06271	-0.036956	0
chr6:52414744-52414785	-0.253484	0.11846	-0.253484	0.11846	0	0
chr6:53342632-53342673	-0.123859	0.057892	-0.105434	0.057892	0.018425	0
chr6:70616311-70616352	0.989211	2.6855	1.02644	2.6855	0.037229	0
chr6:70616311-70616352	0.989211	2.6855	0.943168	2.6855	-0.046043	0
chr6:109241366-109241407	-0.149818	0.054652	-0.164761	0.047123	-0.014943	-0.007529
chr6:109241366-109241407	-0.149818	0.054652	-0.172061	0.057106	-0.022243	0.002454
chr6:110391768-110391809	-0.0459158	0.069946	-0.109568	0.069946	-0.0636522	0
chr6:110396270-110396311	-0.187421	0.078387	-0.24086	0.067951	-0.053439	-0.010436
chr6:110396270-110396311	-0.187421	0.078387	-0.187421	0.078387	0	0
chr6:116399331-116399372	-0.159787	0.14511	-0.226405	0.14511	-0.066618	0
chr6:116399331-116399372	-0.159787	0.14511	-0.159787	0.14511	0	0
chr6:118894718-118894759	-0.181696	0.07589	-0.202975	0.07589	-0.021279	0
chr6:118894718-118894759	-0.181696	0.07589	-0.18999	0.10478	-0.008294	0.02889
chr6:135210293-135210334	-0.131911	0.074003	-0.121455	0.074003	0.010456	0
chr6:135210293-135210334	-0.131911	0.074003	-0.197734	0.074003	-0.065823	0
chr6:142946363-142946404	-0.292402	0.10355	-0.292402	0.10355	0	0
chr6:142946363-142946404	-0.292402	0.10355	-0.255126	0.10355	0.037276	0
chr6:145687981-145688022	-0.168645	0.074792	-0.134423	0.074792	0.034222	0
chr6:145687981-145688022	-0.168645	0.074792	-0.156066	0.074792	0.012579	0
chr6:147359203-147359244	0.052861	0.069366	0.0321763	0.069366	-0.0206847	0
chr6:147359203-147359244	0.052861	0.069366	0.11488	0.069366	0.062019	0
chr6:156617545-156617586	-0.262462	0.078607	-0.205441	0.078607	0.057021	0
chr6:156617545-156617586	-0.262462	0.078607	-0.304127	0.078607	-0.041665	0
chr6:157419135-157419176	-0.132793	0.071968	-0.132793	0.071968	0	0
chr6:157419135-157419176	-0.132793	0.071968	-0.149627	0.089992	-0.016834	0.018024
chr6:157671596-157671637	-0.015327	0.12942	-0.015327	0.12942	0	0
chr7:966917-966958	-0.0859529	0.24198	-0.149675	0.24198	-0.0637221	0
chr7:2256897-2256938	0.290969	0.15636	0.290969	0.15636	0	0
chr7:2256897-2256938	0.290969	0.15636	0.164862	0.15636	-0.126107	0
chr7:2522548-2522589	-0.074431	0.12117	-0.135272	0.12117	-0.060841	0
chr6:28828059-28828100	-0.0906916	0.096243	-0.172731	0.078607	-0.0820394	-0.017636
chr6:29143978-29144019	0.0323953	0.17792	-0.0644695	0.17792	-0.0968648	0
chr6:29580292-29580333	-0.159002	0.081163	-0.222506	0.081163	-0.063504	0
chr6:29580292-29580333	-0.159002	0.081163	-0.196178	0.081163	-0.037176	0
chr6:29580292-29580333	-0.159002	0.081163	-0.159002	0.081163	0	0
chr6:30018527-30018568	-0.252604	0.051657	-0.252604	0.051657	0	0
chr6:30018527-30018568	-0.252604	0.051657	-0.316994	0.051657	-0.06439	0
chr6:36864307-36864348	-0.241518	0.075209	-0.251168	0.075209	-0.00965	0
chr6:26408303-26408344	0.119946	0.063456	0.119946	0.063456	0	0
chr6:26408303-26408344	0.119946	0.063456	0.0592229	0.063456	-0.0607231	0
chr9:25235045-25235086	-1.02253	0.17792	-0.696923	0.17792	0.325607	0
chr11:90226449-90226490	-0.202559	0.21376	-0.171119	0.21376	0.03144	0
chr11:90226449-90226490	-0.202559	0.21376	-0.106145	0.21376	0.096414	0
chr1:72359441-72359482	-0.0245059	0.19354	-0.0245059	0.19354	0	0
chr6:31338623-31338664	-0.224698	0.42348	-0.124381	0.42348	0.100317	0
chr6:27444587-27444628	-0.178183	0.1128	-0.178183	0.1128	0	0
chr6:27444587-27444628	-0.178183	0.1128	-0.0258199	0.1128	0.152363	0
chr6:32609836-32609877	-0.100708	0.099363	-0.100708	0.099363	0	0
chr9:17044953-17044994	0.0242252	0.20272	0.00102532	0.20272	-0.0231999	0
chr9:17044953-17044994	0.0242252	0.20272	0.0242252	0.20272	0	0
chr6:65967025-65967066	0.169516	0.073547	0.130975	0.079664	-0.038541	0.006117
chr6:28139029-28139070	0.0145842	0.15246	-0.0395059	0.076179	-0.0540901	-0.076281
chr10:104694894-104694935	-0.184888	0.071968	-0.237368	0.054447	-0.05248	-0.017521
chr10:104694894-104694935	-0.184888	0.071968	-0.231581	0.053816	-0.046693	-0.018152
chr14:74768107-74768148	-0.107107	0.10352	-0.070664	0.10352	0.036443	0
chr14:74768107-74768148	-0.107107	0.10352	-0.107107	0.10352	0	0
chr5:165057922-165057963	-0.101714	0.054883	-0.108229	0.74922	-0.006515	0.694337
chr5:165057922-165057963	-0.101714	0.054883	-0.129344	0.054883	-0.02763	0
chr7:12210732-12210773	-0.152143	0.10502	-0.282497	0.069366	-0.130354	-0.035654
chr5:104636636-104636677	0.153663	0.14616	0.153663	0.14616	0	0
chr5:104636636-104636677	0.153663	0.14616	0.132422	0.14616	-0.021241	0
chr11:88972047-88972088	-0.0693186	0.14511	-0.12348	0.14511	-0.0541614	0
chr6:24275235-24275276	-0.107939	0.052695	-0.107939	0.052695	0	0
chr2:124218566-124218607	-0.267191	0.043805	-0.1592	0.057106	0.107991	0.013301
chr2:124218566-124218607	-0.267191	0.043805	-0.267191	0.043805	0	0
chr18:37558262-37558303	0.0590401	0.24745	-0.149865	0.078387	-0.208905	-0.169063
chr18:37558262-37558303	0.0590401	0.24745	-0.156302	0.078387	-0.215342	-0.169063
chr14:85574796-85574837	-0.163058	0.072665	-0.163058	0.072665	0	0
chr14:95517618-95517659	-0.122406	0.049337	-0.0975677	0.21386	0.0248383	0.164523
chr15:64743760-64743801	-0.0506921	0.082669	-0.205613	0.057247	-0.154921	-0.025422
chr15:73372362-73372403	-0.373714	0.086504	-0.421195	0.086504	-0.047481	0
chr15:84829394-84829435	-0.23848	0.077527	-0.23848	0.077527	0	0
chr15:95917650-95917691	0.330574	0.12908	0.247425	0.12908	-0.083149	0
chr16:1778009-1778050	-0.175703	0.096485	-0.178698	0.096485	-0.002995	0
chr16:1778009-1778050	-0.175703	0.096485	-0.157697	0.11031	0.018006	0.013825
chr16:4232263-4232304	-0.33069	0.055396	-0.29106	0.055396	0.03963	0
chr16:54564405-54564446	-0.133893	0.099363	-0.225382	0.099363	-0.091489	0
chr16:58550848-58550889	0.0107627	0.21887	0.0107627	0.21887	0	0
chr16:86151013-86151054	-0.216888	0.069366	-0.189517	0.069366	0.027371	0
chr16:88486770-88486811	-0.370071	0.11953	-0.262667	0.11953	0.107404	0
chr16:88486770-88486811	-0.370071	0.11953	-0.237668	0.11953	0.132403	0
chr17:4897848-4897889	-0.326746	0.11449	-0.334001	0.11449	-0.007255	0
chr17:4897848-4897889	-0.326746	0.11449	-0.326746	0.11449	0	0
chr17:50588683-50588724	-0.146275	0.11502	-0.234826	0.11502	-0.088551	0
chr17:63910025-63910066	0.0313531	0.12614	0.10308	0.24745	0.0717269	0.12131
chr17:66309995-66310036	-0.151938	0.13145	-0.0876711	0.13145	0.0642669	0
chr17:79807906-79807947	0.445395	0.26757	0.220839	0.26757	-0.224556	0
chr17:79807906-79807947	0.445395	0.26757	0.445395	0.26757	0	0
chr18:28759605-28759646	-0.0500283	0.086876	0.0264022	0.086876	0.0764305	0
chr18:32449158-32449199	0.298734	0.30584	0.287872	0.30584	-0.010862	0
chr18:34819275-34819316	-0.186166	0.1579	-0.186166	0.1579	0	0
chr18:59471705-59471746	0.0737083	0.21591	0.0737083	0.21591	0	0
chr19:1217541-1217582	0.0749781	0.2133	0.0777391	0.23622	0.002761	0.02292
chr19:7516338-7516379	-0.225862	0.89972	-0.207417	0.89972	0.018445	0
chr19:7516338-7516379	-0.225862	0.89972	-0.246121	0.89972	-0.020259	0
chr19:18622525-18622566	-0.256354	0.06271	-0.204395	0.06271	0.051959	0
chr19:18622525-18622566	-0.256354	0.06271	-0.217866	0.06271	0.038488	0
chr20:4050986-4051027	-0.0723666	0.13478	-0.0723666	0.13478	0	0
chr20:38204104-38204145	-0.0805111	0.094961	-0.164954	0.085182	-0.0844429	-0.009779
chr22:23841668-23841709	-0.101389	0.11835	-0.174028	0.11835	-0.072639	0
chr22:41458422-41458463	-0.512278	0.21591	-0.568178	0.1128	-0.0559	-0.10311
chr1:2212648-2212689	-0.0942784	0.12426	-0.0906938	0.12426	0.0035846	0
chr1:2212648-2212689	-0.0942784	0.12426	-0.0942784	0.12426	0	0
chr1:39188680-39188721	-0.878376	0.21386	-0.765336	0.21386	0.11304	0
chr1:50754325-50754366	-0.206138	0.11502	-0.191514	0.11502	0.014624	0
chr1:112017595-112017636	-0.298193	0.063456	-0.233684	0.07478	0.064509	0.011324
chr1:155170431-155170472	-0.0305936	0.27442	-0.158735	0.27442	-0.128141	0
chr1:155170431-155170472	-0.0305936	0.27442	-0.0305936	0.27442	0	0
chr1:228263147-228263188	-0.212859	0.91853	-0.212859	0.91853	0	0
chr2:8616033-8616074	-0.0835812	0.042465	-0.112067	0.042465	-0.0284858	0
chr2:8616033-8616074	-0.0835812	0.042465	-0.187502	0.052891	-0.103921	0.010426
chr2:40516023-40516064	-0.226695	0.26803	-0.241518	0.26803	-0.014823	0
chr2:40516023-40516064	-0.226695	0.26803	-0.173222	0.26803	0.053473	0
chr2:66529824-66529865	-0.286733	0.06473	-0.285637	0.06473	0.001096	0
chr2:102799015-102799056	-0.122455	0.069631	-0.193912	0.049857	-0.071457	-0.019774
chr2:163491227-163491268	-0.280611	0.075674	-0.333916	0.056408	-0.053305	-0.019266
chr2:178693619-178693660	-0.112937	0.11112	-0.162323	0.11112	-0.049386	0
chr2:178693619-178693660	-0.112937	0.11112	-0.18232	0.11112	-0.069383	0
chr3:38725804-38725845	-0.17921	0.10597	-0.17921	0.10597	0	0
chr3:38725804-38725845	-0.17921	0.10597	-0.256386	0.21386	-0.077176	0.10789
chr3:53736541-53736582	-0.34108	0.28334	-0.306831	0.075536	0.034249	-0.207804
chr3:66311762-66311803	-0.21837	0.087151	-0.21837	0.087151	0	0
chr3:69353630-69353671	-0.250336	0.1254	-0.254358	0.1254	-0.004022	0
chr4:60737367-60737408	0.392716	2.6855	0.280363	2.6855	-0.112353	0
chr3:73505751-73505792	-0.013507	0.073062	-0.013507	0.073062	0	0
chr3:73505751-73505792	-0.013507	0.073062	-0.189742	0.073062	-0.176235	0
chr3:111924694-111924735	-0.179872	0.090212	-0.172054	0.090212	0.007818	0
chr10:86749311-86749352	-0.537426	0.096243	-0.537426	0.096243	0	0
chr10:114022282-114022323	-0.0723874	0.073062	-0.149122	0.073062	-0.0767346	0
chr10:121589128-121589169	-0.0493647	0.099335	-0.00806955	0.086639	0.0412951	-0.012696
chr11:30410609-30410650	-0.0775204	0.18789	-0.2748	0.067951	-0.19728	-0.119939
chr11:30410609-30410650	-0.0775204	0.18789	-0.208324	0.073062	-0.130804	-0.114828
chr11:32351206-32351247	-0.713303	0.2887	-0.713303	0.2887	0	0
chr11:65623826-65623867	-0.115695	0.14117	-0.115695	0.14117	0	0
chr11:65623826-65623867	-0.115695	0.14117	-0.0189893	0.14117	0.0967057	0
chr11:111905322-111905363	-0.0389138	0.054883	-0.0608125	0.054883	-0.0218987	0
chr11:111905322-111905363	-0.0389138	0.054883	0.0287438	0.054883	0.0676576	0
chr11:113795593-113795634	-0.135718	0.075674	-0.231251	0.075674	-0.095533	0
chr12:20391407-20391448	0.363636	0.19354	0.237742	0.19354	-0.125894	0
chr12:26153531-26153572	-0.125428	0.17091	-0.125428	0.17091	0	0
chr12:45815717-45815758	-0.309351	0.12242	-0.251708	0.12242	0.057643	0
chr12:63889214-63889255	-0.211447	0.11115	-0.183712	0.11115	0.027735	0
chr12:66000864-66000905	-0.149422	0.072731	-0.216262	0.096485	-0.06684	0.023754
chr12:66000864-66000905	-0.149422	0.072731	-0.149422	0.072731	0	0
chr12:84412499-84412540	-0.0694032	0.14616	0.000396819	0.14616	0.0698	0
chr12:104110008-104110049	-0.207887	0.075536	-0.226931	0.075536	-0.019044	0
chr12:106772324-106772365	-0.0506134	0.063456	-0.0132642	0.063456	0.0373492	0
chr12:109539068-109539109	0.603341	0.27482	0.477896	0.27482	-0.125445	0
chr12:117053999-117054040	0.399752	0.1579	0.114296	0.12242	-0.285456	-0.03548
chr13:38686994-38687035	0.0571982	0.23622	0.0870873	0.23622	0.0298891	0
chr13:102225899-102225940	-0.109997	0.11502	-0.0661879	0.11502	0.0438091	0
chr14:21077051-21077092	-0.0712378	0.10501	-0.0429989	0.10373	0.0282389	-0.00128
chr14:21077051-21077092	-0.0712378	0.10501	-0.0591917	0.10373	0.0120461	-0.00128
chr14:29281018-29281059	-0.350206	0.21339	-0.302816	0.21339	0.04739	0
chr14:32454110-32454151	-0.230233	0.069946	-0.187438	0.076064	0.042795	0.006118
chr14:35401991-35402032	-0.237558	0.067951	-0.261102	0.067951	-0.023544	0
chr14:35401991-35402032	-0.237558	0.067951	-0.295055	0.067951	-0.057497	0
chr14:63990900-63990941	-0.181082	0.1579	-0.181082	0.1579	0	0
chr14:103523535-103523576	-0.197491	0.063185	-0.197491	0.063185	0	0
chr16:4273946-4273987	-0.133491	0.1128	-0.191318	0.11164	-0.057827	-0.00116
chr17:63915757-63915798	-0.191033	0.069302	-0.180352	0.069302	0.010681	0
chr1:21957478-21957519	-0.116299	0.3658	-0.116299	0.3658	0	0
chr1:36220117-36220158	-0.0267933	0.74783	0.0118211	0.40673	0.0386144	-0.3411
chr1:200302260-200302301	-0.0817773	0.057742	-0.0465948	0.069469	0.0351825	0.011727
chr1:200302260-200302301	-0.0817773	0.057742	-0.0680641	0.071968	0.0137132	0.014226
chr2:42310835-42310876	-0.197651	0.1325	-0.199827	0.1325	-0.002176	0
chr2:202508287-202508328	-0.945437	0.11449	-0.822489	0.12802	0.122948	0.01353
chr2:216763344-216763385	-0.0785867	0.075674	-0.117117	0.075674	-0.0385303	0
chr3:158616082-158616123	-0.238374	0.077403	-0.239192	0.077403	-0.000818	0
chr4:119148904-119148945	-0.329443	0.06473	-0.202155	0.06473	0.127288	0
chr5:108874583-108874624	-0.275475	0.076179	-0.275475	0.076179	0	0
chr6:133893367-133893408	0.0277473	0.11494	0.0377311	0.11505	0.0099838	0.00011
chr6:133893367-133893408	0.0277473	0.11494	0.0207487	0.11494	-0.0069986	0
chr8:102902118-102902159	-0.123313	0.062254	-0.118544	0.062254	0.004769	0
chr10:32559014-32559055	-0.163259	0.065934	-0.0933498	0.065934	0.0699092	0
chr12:66010824-66010865	-0.090841	0.24745	-0.12838	0.24745	-0.037539	0
chr12:66010824-66010865	-0.090841	0.24745	-0.112887	0.24745	-0.022046	0
chr14:21074587-21074628	-0.16886	0.2133	-0.16886	0.2133	0	0
chr14:21074587-21074628	-0.16886	0.2133	-0.177098	0.2133	-0.008238	0
chr16:15740852-15740893	-0.621418	0.070757	-0.636215	0.070757	-0.014797	0
chr16:86088898-86088939	-0.293301	0.069366	-0.293301	0.069366	0	0
chr17:75509071-75509112	-0.176443	0.2916	-0.176443	0.2916	0	0
chr2:47923428-47923469	-0.063683	0.059356	-0.100135	0.059356	-0.036452	0
chr7:37358490-37358531	-0.0358901	0.17067	0.0559156	0.18291	0.0918057	0.01224
chr8:30444929-30444970	-0.197051	0.082669	-0.197051	0.082669	0	0
chr8:30444929-30444970	-0.197051	0.082669	-0.0663699	0.082669	0.130681	0
chr20:41437457-41437498	0.0705653	0.099335	0.0705653	0.099335	0	0
chr1:61429565-61429606	-0.0214926	0.075532	-0.045428	0.075532	-0.0239354	0
chr1:168722879-168722920	-0.353694	0.045716	-0.363998	0.047161	-0.010304	0.001445
chr2:186169057-186169098	-0.215851	0.11846	-0.255776	0.096485	-0.039925	-0.021975
chr3:123398298-123398339	-0.149504	0.12453	-0.161067	0.1288	-0.011563	0.00427
chr5:128963566-128963607	-0.26523	0.075607	-0.227062	0.078521	0.038168	0.002914
chr7:136884649-136884690	0.0237807	0.10268	-0.0156142	0.10268	-0.0393949	0
chr8:21918307-21918348	-0.0888775	0.050457	-0.122307	0.045082	-0.0334295	-0.005375
chr9:116552552-116552593	-0.0563102	0.17091	-0.135004	0.11232	-0.0786938	-0.05859
chr9:116552552-116552593	-0.0563102	0.17091	-0.168109	0.082627	-0.111799	-0.088283
chr10:13492214-13492255	-0.0880064	0.18316	-0.160238	0.081233	-0.0722316	-0.101927
chr10:13492214-13492255	-0.0880064	0.18316	-0.2095	0.081233	-0.121494	-0.101927
chr2:67852059-67852100	-0.149348	0.20272	-0.111672	0.059785	0.037676	-0.142935
chr16:67424328-67424369	0.0503728	0.14117	0.0503728	0.14117	0	0
chr16:67424328-67424369	0.0503728	0.14117	0.0241756	0.14117	-0.0261972	0
chr16:69708464-69708505	-0.0787046	0.30584	-0.0126414	0.30584	0.0660632	0
chr16:69708464-69708505	-0.0787046	0.30584	-0.0180372	0.30584	0.0606674	0
chr16:81837344-81837385	-0.244077	0.075607	-0.258827	0.075607	-0.01475	0
chr16:81837344-81837385	-0.244077	0.075607	-0.265048	0.075607	-0.020971	0
chr16:81855997-81856038	-0.236147	0.069366	-0.232446	0.069366	0.003701	0
chr16:81937778-81937819	-0.251196	0.057444	-0.198313	0.069631	0.052883	0.012187
chr16:81937778-81937819	-0.251196	0.057444	-0.270661	0.057444	-0.019465	0
chr16:84548197-84548238	-0.15183	0.10501	-0.264904	0.10501	-0.113074	0
chr16:85382000-85382041	-0.0597151	0.07589	-0.105795	0.07589	-0.0460799	0
chr16:85382000-85382041	-0.0597151	0.07589	-0.0807397	0.07589	-0.0210246	0
chr16:85404002-85404043	-0.310681	0.087081	-0.310681	0.087081	0	0
chr16:85672791-85672832	-0.264289	0.099335	-0.264289	0.099335	0	0
chr16:88948443-88948484	-0.158741	0.11232	-0.247919	0.11232	-0.089178	0
chr16:88948443-88948484	-0.158741	0.11232	-0.174516	0.11232	-0.015775	0
chr16:89258756-89258797	0.0250638	0.16996	0.0421362	0.16996	0.0170724	0
chr17:1383429-1383470	-0.55441	0.27482	-0.562738	0.1128	-0.008328	-0.16202
chr17:1490473-1490514	-0.124911	0.06271	-0.253105	0.06271	-0.128194	0
chr17:1631740-1631781	-0.319578	0.090212	-0.370078	0.090212	-0.0505	0
chr17:2649838-2649879	0.0411448	0.12942	0.0411448	0.12942	0	0
chr17:3915306-3915347	-0.151876	0.104	-0.151876	0.104	0	0
chr17:4932312-4932353	-0.198296	0.38786	-0.195772	0.38786	0.002524	0
chr17:4933066-4933107	0.0838174	0.11449	0.0873809	0.11232	0.0035635	-0.00217
chr17:4933066-4933107	0.0838174	0.11449	0.0519418	0.11232	-0.0318756	-0.00217
chr17:4933880-4933921	-0.165358	0.22582	-0.136282	0.22582	0.029076	0
chr17:4945952-4945993	-0.00282583	0.22191	-0.0169759	0.17091	-0.0141501	-0.051
chr17:5359434-5359475	-0.0246242	0.1263	-0.0358153	0.14265	-0.0111911	0.01635
chr17:5391403-5391444	-0.381445	0.063493	-0.335265	0.063493	0.04618	0
chr17:7007649-7007690	-0.576131	1.0123	-0.390187	1.0123	0.185944	0
chr17:7491002-7491043	-0.105824	0.048347	-0.153996	0.048347	-0.048172	0
chr17:7491002-7491043	-0.105824	0.048347	-0.119838	0.048347	-0.014014	0
chr15:52375233-52375274	-0.18208	0.11846	-0.202427	0.12654	-0.020347	0.00808
chr15:57006743-57006784	0.241373	0.22162	0.220893	0.22162	-0.02048	0
chr15:63049777-63049818	-0.268604	0.043381	-0.221344	0.043381	0.04726	0
chr15:63049777-63049818	-0.268604	0.043381	-0.266402	0.044631	0.002202	0.00125
chr15:63071271-63071312	-0.138089	0.12481	-0.17399	0.12481	-0.035901	0
chr15:64889061-64889102	-0.07863	0.06988	-0.149732	0.067752	-0.071102	-0.002128
chr15:64889061-64889102	-0.07863	0.06988	-0.105953	0.067752	-0.027323	-0.002128
chr15:66317323-66317364	-0.663014	0.062254	-0.663014	0.062254	0	0
chr15:75407162-75407203	-0.129577	0.10373	-0.129577	0.10373	0	0
chr15:89068306-89068347	-0.202506	0.11449	-0.232259	0.11449	-0.029753	0
chr15:90000791-90000832	-0.0824361	0.11563	-0.0824361	0.11563	0	0
chr15:90035290-90035331	-0.367739	0.095428	-0.278037	0.095428	0.089702	0
chr15:90035290-90035331	-0.367739	0.095428	-0.367739	0.095428	0	0
chr15:90969017-90969058	-0.0911158	0.094961	-0.19277	0.094961	-0.101654	0
chr15:90969017-90969058	-0.0911158	0.094961	-0.108902	0.094961	-0.0177862	0
chr16:477465-477506	-0.21679	0.047626	-0.2224	0.047626	-0.00561	0
chr16:477465-477506	-0.21679	0.047626	-0.27557	0.047626	-0.05878	0
chr16:4289663-4289704	-0.290599	0.05227	-0.722907	0.053816	-0.432308	0.001546
chr16:4852017-4852058	-0.11616	0.066742	-0.11616	0.066742	0	0
chr16:4974020-4974061	-0.307765	0.1006	-0.307765	0.1006	0	0
chr16:4974020-4974061	-0.307765	0.1006	-0.225598	0.1006	0.082167	0
chr16:8947617-8947658	0.128758	0.91853	0.153802	0.91853	0.025044	0
chr16:15722269-15722310	-0.136883	0.05973	-0.21328	0.05973	-0.076397	0
chr16:24749705-24749746	-0.0451992	0.06928	-0.0828393	0.075536	-0.0376401	0.006256
chr16:24749705-24749746	-0.0451992	0.06928	-0.0451992	0.06928	0	0
chr16:28494319-28494360	-0.0205799	0.22582	-0.0205799	0.22582	0	0
chr16:28494319-28494360	-0.0205799	0.22582	-0.0495061	0.22582	-0.0289262	0
chr16:29809139-29809180	-0.124688	0.061729	-0.0468355	0.0626	0.0778525	0.000871
chr16:29809139-29809180	-0.124688	0.061729	-0.124688	0.061729	0	0
chr16:30091819-30091860	-0.104125	0.12654	-0.118213	0.12654	-0.014088	0
chr16:30091819-30091860	-0.104125	0.12654	-0.104125	0.12654	0	0
chr16:30689517-30689558	-0.2626	0.048245	-0.257277	0.048245	0.005323	0
chr16:53072291-53072332	-0.561131	0.44931	-0.549007	0.44931	0.012124	0
chr16:53072291-53072332	-0.561131	0.44931	-0.578449	0.44931	-0.017318	0
chr16:53206354-53206395	-0.644674	0.22242	-0.644674	0.22242	0	0
chr18:3441149-3441190	-0.15334	0.054447	-0.139396	0.054447	0.013944	0
chr18:3608668-3608709	-0.0512693	0.10831	-0.0980164	0.10831	-0.0467471	0
chr18:3652488-3652529	-0.297306	0.077527	-0.273861	0.077527	0.023445	0
chr18:12882340-12882381	-0.204616	0.073131	-0.204616	0.073131	0	0
chr18:44460394-44460435	-0.351593	0.076179	-0.351593	0.076179	0	0
chr18:45723104-45723145	0.00324932	0.27482	-0.099965	0.27482	-0.103214	0
chr18:45723104-45723145	0.00324932	0.27482	-0.0400489	0.27482	-0.0432982	0
chr18:46262049-46262090	-0.155329	0.11449	-0.152865	0.11449	0.002464	0
chr18:46265898-46265939	-0.0427783	0.12481	-0.0427783	0.12481	0	0
chr18:46265898-46265939	-0.0427783	0.12481	-0.0540554	0.1325	-0.0112771	0.00769
chr18:63253601-63253642	-0.271656	0.054352	-0.213796	0.059776	0.05786	0.005424
chr18:63253601-63253642	-0.271656	0.054352	-0.271656	0.054352	0	0
chr2:173345074-173345115	0.0282886	0.11846	0.0429252	0.11846	0.0146366	0
chr2:173354387-173354428	-0.132429	0.077403	-0.132429	0.077403	0	0
chr2:173354387-173354428	-0.132429	0.077403	-0.234467	0.077403	-0.102038	0
chr2:173999133-173999174	0.168948	0.27442	0.168948	0.27442	0	0
chr2:181447525-181447566	-0.122209	0.085182	-0.122209	0.085182	0	0
chr2:196141900-196141941	-0.227915	0.076179	-0.227915	0.076179	0	0
chr2:197343180-197343221	-0.782277	0.043597	-0.782277	0.043597	0	0
chr2:200829934-200829975	-0.36153	0.20246	-0.307377	0.20246	0.054153	0
chr2:203226735-203226776	-0.10519	0.072133	-0.214663	0.072133	-0.109473	0
chr2:206220077-206220118	-0.453366	0.40132	-0.393813	0.40132	0.059553	0
chr2:219191487-219191528	-0.615824	0.089992	-0.638096	0.089992	-0.022272	0
chr2:223102231-223102272	0.025634	0.22254	0.025634	0.22254	0	0
chr2:226235118-226235159	-0.187366	0.072831	-0.131144	0.057106	0.056222	-0.015725
chr2:226235118-226235159	-0.187366	0.072831	-0.187366	0.072831	0	0
chr2:226426995-226427036	-0.267673	0.045045	-0.239482	0.045045	0.028191	0
chr2:226426995-226427036	-0.267673	0.045045	-0.267673	0.045045	0	0
chr2:230877976-230878017	-0.229393	0.17792	-0.174209	0.17792	0.055184	0
chr2:235456686-235456727	-0.136107	0.1059	-0.166938	0.1059	-0.030831	0
chr2:240571466-240571507	0.180237	0.27442	0.271784	0.12614	0.091547	-0.14828
chr2:240571466-240571507	0.180237	0.27442	0.328622	0.23622	0.148385	-0.0382
chr2:241302271-241302312	1.0688	2.6855	0.551738	2.6855	-0.517062	0
chr3:12227746-12227787	-0.0786769	0.06271	-0.186233	0.06271	-0.107556	0
chr3:12227746-12227787	-0.0786769	0.06271	-0.130737	0.06271	-0.0520601	0
chr3:16857330-16857371	-0.023946	0.11846	-0.0359323	0.085019	-0.0119863	-0.033441
chr3:16888074-16888115	-0.295519	0.073019	-0.255892	0.072665	0.039627	-0.000354
chr3:16929426-16929467	0.044781	0.21887	-0.0533867	0.21887	-0.0981677	0
chr3:16929426-16929467	0.044781	0.21887	-0.0744302	0.21887	-0.119211	0
chr3:17056887-17056928	-0.114257	0.077527	-0.217369	0.059785	-0.103112	-0.017742
chr3:20064161-20064202	-0.003602	0.094961	-0.0522623	0.065822	-0.0486603	-0.029139
chr3:24306289-24306330	-0.220389	0.11953	-0.220389	0.11953	0	0
chr3:24306289-24306330	-0.220389	0.11953	-0.190927	0.11953	0.029462	0
chr3:25504799-25504840	-0.807671	0.2133	-0.799909	0.078038	0.007762	-0.135262
chr3:38165528-38165569	-0.300947	0.17677	-0.404942	0.17677	-0.103995	0
chr3:49664530-49664571	-0.151811	0.14511	-0.139405	0.14511	0.012406	0
chr3:49932857-49932898	-0.886314	0.096243	-0.549265	0.096243	0.337049	0
chr3:67375519-67375560	-0.351543	0.072133	-0.306128	0.18789	0.045415	0.115757
chr3:71207138-71207179	-0.174938	0.085019	-0.254267	0.085019	-0.079329	0
chr3:88002431-88002472	0.682766	2.6855	0.42124	2.6855	-0.261526	0
chr3:121626227-121626268	0.0356678	0.096166	0.0755586	0.096166	0.0398908	0
chr3:122374703-122374744	-0.200363	0.056059	-0.223711	0.056059	-0.023348	0
chr3:123386776-123386817	-0.0875012	0.24198	0.0348631	0.24198	0.122364	0
chr3:125202834-125202875	-0.148629	2.7258	-0.0257863	2.7258	0.122843	0
chr3:128592541-128592582	0.082205	0.61167	0.00236284	0.61167	-0.0798422	0
chr3:128603754-128603795	-0.30414	0.098553	-0.285436	0.098553	0.018704	0
chr3:128603754-128603795	-0.30414	0.098553	-0.24907	0.098553	0.05507	0
chr3:133757905-133757946	-0.201395	0.10501	-0.170919	0.10501	0.030476	0
chr3:133757905-133757946	-0.201395	0.10501	-0.201395	0.10501	0	0
chr3:138244263-138244304	-0.424955	0.060797	-0.4905	0.060797	-0.065545	0
chr17:46018081-46018122	-0.741762	0.10501	-0.559006	0.070066	0.182756	-0.034944
chr17:46135523-46135564	-0.740016	0.056408	-0.740016	0.056408	0	0
chr17:47502752-47502793	-0.189009	0.073062	-0.306632	0.073062	-0.117623	0
chr17:49346358-49346399	-0.405234	0.24096	-0.488545	0.24096	-0.083311	0
chr17:49711402-49711443	-0.140869	0.087151	-0.161642	0.087151	-0.020773	0
chr17:49779527-49779568	-0.278996	0.049703	-0.292821	0.049703	-0.013825	0
chr17:49779527-49779568	-0.278996	0.049703	-0.300903	0.049703	-0.021907	0
chr17:49779942-49779983	-0.0981014	0.11449	-0.0981014	0.11449	0	0
chr17:49805794-49805835	-0.242265	0.062756	-0.242265	0.062756	0	0
chr17:55193439-55193480	-0.185831	0.081796	-0.17972	0.11232	0.006111	0.030524
chr17:59887919-59887960	-0.731473	0.11846	-0.731473	0.11846	0	0
chr17:61652637-61652678	-0.311611	0.069631	-0.311611	0.069631	0	0
chr17:73219648-73219689	-0.604516	0.048245	-0.633788	0.048245	-0.029272	0
chr17:76387007-76387048	-0.133253	0.24745	-0.133253	0.24745	0	0
chr17:76461960-76462001	-0.285339	0.083468	-0.273688	0.083468	0.011651	0
chr17:78125217-78125258	-0.248735	0.05926	-0.248735	0.05926	0	0
chr17:78187132-78187173	-0.163194	0.099335	-0.0797888	0.11449	0.0834052	0.015155
chr17:78187132-78187173	-0.163194	0.099335	-0.192956	0.083468	-0.029762	-0.015867
chr17:78395552-78395593	-0.131413	0.17677	-0.131413	0.17677	0	0
chr17:78395552-78395593	-0.131413	0.17677	-0.222532	0.17677	-0.091119	0
chr17:80018285-80018326	0.0814303	0.077065	0.0157719	0.077065	-0.0656584	0
chr17:80138058-80138099	-0.367474	0.066742	-0.267996	0.078521	0.099478	0.011779
chr17:81558614-81558655	-0.0362791	0.081163	-0.00876062	0.085158	0.0275185	0.003995
chr17:81558614-81558655	-0.0362791	0.081163	-0.0796316	0.081163	-0.0433525	0
chr17:82520981-82521022	-0.282281	0.16996	-0.282281	0.16996	0	0
chr17:82520981-82521022	-0.282281	0.16996	-0.252056	0.16996	0.030225	0
chr18:660422-660463	0.0315485	0.089992	0.0315485	0.089992	0	0
chr18:2987020-2987061	0.0889891	0.13586	0.0661162	0.13586	-0.0228729	0
chr2:45045653-45045694	-0.20994	0.12942	-0.148186	0.12942	0.061754	0
chr2:176247071-176247112	-0.131164	0.076179	-0.154039	0.076179	-0.022875	0
chr2:176247071-176247112	-0.131164	0.076179	-0.131164	0.076179	0	0
chr2:222207280-222207321	-0.127981	0.080349	-0.133973	0.080349	-0.005992	0
chr3:54690513-54690554	-0.210002	0.1579	-0.291286	0.077527	-0.081284	-0.080373
chr4:121076929-121076970	-0.271637	0.057803	-0.387505	0.057803	-0.115868	0
chr17:71146467-71146508	-0.0591516	0.094961	-0.0328645	0.094961	0.0262871	0
chr1:243451383-243451424	-0.118308	0.078387	0.0655469	0.24096	0.183855	0.162573
chr14:64743171-64743212	-0.0985908	0.096485	-0.120602	0.16841	-0.0220112	0.071925
chr14:64761331-64761372	-0.0964988	0.20068	-0.132996	0.20068	-0.0364972	0
chr14:64777857-64777898	-0.171954	0.10465	-0.104918	0.10465	0.067036	0
chr14:64783077-64783118	-0.111119	0.083468	-0.111119	0.083468	0	0
chr14:64799795-64799836	-0.187048	0.14511	-0.187048	0.14511	0	0
chr14:64816104-64816145	-0.05081	0.25303	1.13e-05	0.25303	0.0508213	0
chr14:64835054-64835095	-0.0700813	0.077527	-0.0700813	0.077527	0	0
chr14:64883233-64883274	-0.128635	0.051657	-0.123246	0.051657	0.005389	0
chr14:64935770-64935811	-0.201381	0.062071	-0.201381	0.062071	0	0
chr3:157080923-157080964	-0.244005	0.072133	-0.204714	0.072133	0.039291	0
chr3:157080923-157080964	-0.244005	0.072133	-0.298161	0.072133	-0.054156	0
chr6:53654787-53654828	-0.0161087	0.10373	-0.00954295	0.10373	0.00656575	0
chr7:127375009-127375050	-0.033623	0.072665	-0.0167063	0.072665	0.0169167	0
chr7:127375009-127375050	-0.033623	0.072665	-0.033623	0.072665	0	0
chr7:128225743-128225784	0.0238678	0.62097	0.0413799	0.62097	0.0175121	0
chr7:128254519-128254560	-0.325172	0.096779	-0.344756	0.08222	-0.019584	-0.014559
chr7:130782075-130782116	-0.0599017	0.064943	-0.139475	0.063493	-0.0795733	-0.00145
chr7:130782075-130782116	-0.0599017	0.064943	-0.0759092	0.063493	-0.0160075	-0.00145
chr19:8698572-8698613	-0.11069	0.11505	-0.11069	0.11505	0	0
chr2:164672346-164672387	-0.402412	0.069366	-0.375248	0.069366	0.027164	0
chr2:164672346-164672387	-0.402412	0.069366	-0.389884	0.069366	0.012528	0
chr16:53775315-53775356	0.0496625	0.21086	0.0607944	0.21086	0.0111319	0
chr16:53775315-53775356	0.0496625	0.21086	0.203076	0.24745	0.153414	0.03659
chr16:53775315-53775356	0.0496625	0.21086	0.0496625	0.21086	0	0
chr12:132089466-132089507	0.260122	0.1253	0.160081	0.099215	-0.100041	-0.026085
chr13:24303284-24303325	-0.0182453	0.16383	-0.0551948	0.16383	-0.0369495	0
chr13:32804627-32804668	-0.397216	0.06551	-0.392889	0.06551	0.004327	0
chr13:40579428-40579469	-0.253947	0.073019	-0.228243	0.073019	0.025704	0
chr13:41007510-41007551	-0.0377456	0.098553	-0.221573	0.074925	-0.183827	-0.023628
chr13:49470825-49470866	-0.035173	0.096243	-0.0165325	0.096243	0.0186405	0
chr13:50909028-50909069	0.627005	0.22162	0.293417	0.22162	-0.333588	0
chr13:51946279-51946320	-0.192529	0.10478	-0.232861	0.10478	-0.040332	0
chr13:72859967-72860008	-0.158771	0.085516	-0.158771	0.13114	0	0.045624
chr13:72859967-72860008	-0.158771	0.085516	-0.157786	0.13114	0.000985	0.045624
chr13:75505646-75505687	-0.00483001	0.1579	0.0196064	0.1579	0.0244364	0
chr13:112698582-112698623	-0.325133	0.11315	-0.325133	0.11315	0	0
chr13:112698582-112698623	-0.325133	0.11315	-0.229757	0.11315	0.095376	0
chr13:113237025-113237066	-0.165694	0.065822	-0.168004	0.065822	-0.00231	0
chr13:113237025-113237066	-0.165694	0.065822	-0.142121	0.065822	0.023573	0
chr13:113595472-113595513	-0.0403605	0.097057	-0.123492	0.097057	-0.0831315	0
chr13:113841031-113841072	-0.268788	0.36897	-0.268788	0.36897	0	0
chr13:113841031-113841072	-0.268788	0.36897	-0.140485	0.36897	0.128303	0
chr14:23022055-23022096	-0.155525	0.085182	-0.234483	0.085182	-0.078958	0
chr14:30726644-30726685	-0.263924	0.054883	-0.284971	0.054883	-0.021047	0
chr14:34789925-34789966	-0.227551	0.072831	-0.227551	0.072831	0	0
chr14:34789925-34789966	-0.227551	0.072831	-0.221738	0.072831	0.005813	0
chr14:37154450-37154491	-0.248048	0.057082	-0.248048	0.057082	0	0
chr14:54973020-54973061	-0.00516749	0.19354	-0.00516749	0.19354	0	0
chr14:58299162-58299203	0.126036	0.23622	-0.00234463	0.23622	-0.128381	0
chr14:67995095-67995136	0.675939	2.6855	0.714307	2.6855	0.038368	0
chr14:68794425-68794466	-0.190216	0.075209	-0.224794	0.075209	-0.034578	0
chr14:69666795-69666836	-0.262089	0.056502	-0.374054	0.056502	-0.111965	0
chr14:72927394-72927435	-0.60711	0.21591	-0.677335	0.095428	-0.070225	-0.120482
chr14:102525791-102525832	-0.766785	0.041816	-0.79009	0.041816	-0.023305	0
chr15:31319818-31319859	-0.207892	0.096779	-0.207892	0.096779	0	0
chr4:80263167-80263208	-0.205372	0.056408	-0.188672	0.056408	0.0167	0
chr4:80263167-80263208	-0.205372	0.056408	-0.1785	0.069946	0.026872	0.013538
chr2:237310836-237310877	0.000188456	0.22582	0.000188456	0.22582	0	0
chr3:124731214-124731255	-0.287832	0.10422	-0.20967	0.20068	0.078162	0.09646
chr3:124731214-124731255	-0.287832	0.10422	-0.287832	0.10422	0	0
chr3:136206329-136206370	-0.176782	2.3828	-0.188718	2.3828	-0.011936	0
chr3:136206329-136206370	-0.176782	2.3828	-0.121933	2.3828	0.054849	0
chr3:138374027-138374068	-0.648255	0.10355	-0.489628	0.075027	0.158627	-0.028523
chr1:37995627-37995668	-0.187148	0.096779	-0.199479	0.096779	-0.012331	0
chr1:37995627-37995668	-0.187148	0.096779	-0.199112	0.10268	-0.011964	0.005901
chr1:55023849-55023890	-0.031931	0.1584	0.032608	0.089642	0.064539	-0.068758
chr1:55023849-55023890	-0.031931	0.1584	-0.0228836	0.06157	0.0090474	-0.09683
chr1:109274948-109274989	-0.477279	0.074925	-0.325409	0.082627	0.15187	0.007702
chr1:109274948-109274989	-0.477279	0.074925	-0.477279	0.074925	0	0
chr1:113905747-113905788	0.126585	0.24745	0.126585	0.24745	0	0
chr1:113905747-113905788	0.126585	0.24745	0.101756	0.24745	-0.024829	0
chr1:151795552-151795593	0.786673	1.0123	0.782215	1.0123	-0.004458	0
chr1:154449571-154449612	-0.144343	0.058309	-0.156372	0.058309	-0.012029	0
chr4:81665876-81665917	-0.0951415	0.090212	-0.0951415	0.090212	0	0
chr4:119979107-119979148	-0.101734	0.11835	-0.101734	0.11835	0	0
chr4:147486480-147486521	-0.196314	0.073062	-0.198436	0.073062	-0.002122	0
chr4:155716901-155716942	-0.202175	0.15178	-0.0590333	0.15178	0.143142	0
chr1:222656188-222656229	-0.0867795	1.0123	0.102743	1.0123	0.189522	0
chr1:230715662-230715703	0.124434	0.11494	0.0940959	0.11169	-0.0303381	-0.00325
chr2:19742692-19742733	-0.303621	0.072133	-0.303621	0.072133	0	0
chr2:21310215-21310256	-0.14822	0.05227	-0.315344	0.057106	-0.167124	0.004836
chr2:43854468-43854509	-0.0433836	0.087081	-0.126077	0.087081	-0.0826934	0
chr2:45669278-45669319	0.0279184	0.11953	0.0732531	0.11953	0.0453347	0
chr2:162254006-162254047	-0.145827	0.077403	-0.0761605	0.077403	0.0696665	0
chr2:162254006-162254047	-0.145827	0.077403	-0.136522	0.077403	0.009305	0
chr2:202943789-202943830	1.01824	0.3049	0.871963	0.3049	-0.146277	0
chr2:202943789-202943830	1.01824	0.3049	0.866427	0.3049	-0.151813	0
chr2:215435739-215435780	-0.189868	0.089992	-0.20363	0.089992	-0.013762	0
chr2:215435739-215435780	-0.189868	0.089992	-0.192343	0.089992	-0.002475	0
chr2:217815786-217815827	-0.304132	0.047626	-0.304132	0.047626	0	0
chr2:217815786-217815827	-0.304132	0.047626	-0.336997	0.047626	-0.032865	0
chr3:157135134-157135175	-0.133971	0.077527	-0.149638	0.06495	-0.015667	-0.012577
chr3:172398092-172398133	-0.125975	0.1579	-0.0857129	0.1579	0.0402621	0
chr4:56913381-56913422	-0.120246	0.090753	-0.060282	0.090753	0.059964	0
chr11:65638109-65638150	-0.0727775	0.051258	-0.0453859	0.07272	0.0273916	0.021462
chr11:65638109-65638150	-0.0727775	0.051258	-0.0857568	0.055167	-0.0129793	0.003909
chr11:103799701-103799742	0.0664556	0.072831	-0.0673822	0.072831	-0.133838	0
chr11:110373616-110373657	-0.184649	0.1253	-0.1802	0.1253	0.004449	0
chr11:110373616-110373657	-0.184649	0.1253	-0.0958481	0.1253	0.0888009	0
chr12:111730185-111730226	-0.241037	0.093835	-0.232227	0.094961	0.00881	0.001126
chr12:111730185-111730226	-0.241037	0.093835	-0.22822	0.74783	0.012817	0.653995
chr13:110301870-110301911	-0.108721	0.24745	-0.136512	0.24745	-0.027791	0
chr15:90885386-90885427	-0.161015	0.072336	-0.135054	0.072336	0.025961	0
chr15:90885386-90885427	-0.161015	0.072336	-0.223648	0.072336	-0.062633	0
chr16:75272484-75272525	-0.127374	0.089992	-0.127374	0.089992	0	0
chr17:61154984-61155025	-0.268635	0.07429	-0.268635	0.07429	0	0
chr7:19013090-19013131	-0.0907529	0.096779	-0.181306	0.078387	-0.0905531	-0.018392
chr17:80385125-80385166	-0.300406	0.091937	-0.300406	0.091937	0	0
chr18:22429708-22429749	-0.228502	0.095034	-0.228502	0.095034	0	0
chr19:11143191-11143232	-0.389732	0.096779	-0.328794	0.096779	0.060938	0
chr19:11143191-11143232	-0.389732	0.096779	-0.389732	0.096779	0	0
chr19:44921901-44921942	-0.0382605	0.10316	-0.0838664	0.10316	-0.0456059	0
chr19:44921901-44921942	-0.0382605	0.10316	-0.0507259	0.10316	-0.0124654	0
chr1:55039911-55039952	-0.152786	0.061757	-0.246166	0.061757	-0.09338	0
chr6:32187784-32187825	-0.478479	0.089642	-0.394612	0.089642	0.083867	0
chr6:32187784-32187825	-0.478479	0.089642	-0.531014	0.57678	-0.052535	0.487138
chr6:160596311-160596352	-0.145277	0.10501	-0.133897	0.10501	0.01138	0
chr6:160596311-160596352	-0.145277	0.10501	-0.0997788	0.10501	0.0454982	0
chr12:110958425-110958466	-0.269012	0.069366	-0.241031	0.069366	0.027981	0
chr13:110397256-110397297	-0.0787654	0.087067	-0.119006	0.087067	-0.0402406	0
chr13:110397256-110397297	-0.0787654	0.087067	-0.118526	0.087067	-0.0397606	0
chr13:110397256-110397297	-0.0787654	0.087067	-0.0787654	0.087067	0	0
chr1:201903116-201903157	-0.241401	0.072336	-0.206805	0.072336	0.034596	0
chr1:218654493-218654534	-0.201049	0.070758	-0.169411	0.070758	0.031638	0
chr1:55043892-55043933	-0.137399	0.21339	-0.179134	0.21339	-0.041735	0
chr1:222649637-222649678	0.0935585	2.6855	-0.0276604	2.6855	-0.121219	0
chr2:21019839-21019880	0.201457	0.27442	0.0309788	0.27442	-0.170478	0
chr2:164071176-164071217	-0.124035	0.10502	-0.138407	0.10502	-0.014372	0
chr12:89615162-89615203	-0.0785464	0.058116	-0.14427	0.058116	-0.0657236	0
chr12:89615162-89615203	-0.0785464	0.058116	-0.161317	0.058116	-0.0827706	0
chr12:89615162-89615203	-0.0785464	0.058116	-0.159704	0.058116	-0.0811576	0
chr4:56899545-56899586	-0.620017	0.10501	-0.60334	0.10501	0.016677	0
chr6:12903705-12903746	-0.124044	0.053816	-0.213063	0.052695	-0.089019	-0.001121
chr6:12903705-12903746	-0.124044	0.053816	-0.124044	0.053816	0	0
chr6:73706125-73706166	-0.0520593	0.090571	-0.134003	0.090571	-0.0819437	0
chr6:133888679-133888720	0.274117	0.19168	-0.0914612	0.25223	-0.365578	0.06055
chr6:133888679-133888720	0.274117	0.19168	-0.225829	0.076179	-0.499946	-0.115501
chr6:160580376-160580417	-0.19142	0.20272	-0.124597	0.20272	0.066823	0
chr9:22092905-22092946	-0.0529077	0.1759	-0.151819	0.12117	-0.0989113	-0.05473
chr9:104823937-104823978	-0.377286	0.10316	-0.273619	0.10316	0.103667	0
chr10:89243027-89243068	-0.184298	0.096533	-0.193158	0.096533	-0.00886	0
chr10:103069692-103069733	-0.25147	0.056687	-0.266471	0.089977	-0.015001	0.03329
chr1:36482315-36482356	-0.269595	0.10597	-0.241761	0.10597	0.027834	0
chr1:38826016-38826057	-0.320684	0.04442	-0.274316	0.04442	0.046368	0
chr1:40890085-40890126	0.209118	0.27442	-0.0432582	0.19354	-0.252376	-0.08088
chr1:41770105-41770146	0.359644	0.24198	0.567927	0.24198	0.208283	0
chr1:42958360-42958401	-0.160282	0.087081	-0.116238	0.096485	0.044044	0.009404
chr1:46110851-46110892	-0.355309	0.072133	-0.439214	0.072133	-0.083905	0
chr1:56152219-56152260	0.967851	0.24198	0.967851	0.24198	0	0
chr1:56440582-56440623	-0.18257	0.11502	-0.216687	0.11502	-0.034117	0
chr1:56440582-56440623	-0.18257	0.11502	-0.211335	0.11502	-0.028765	0
chr1:65440787-65440828	-0.143833	0.10502	-0.162217	0.10502	-0.018384	0
chr1:65604078-65604119	-0.263571	0.088944	-0.17458	0.088944	0.088991	0
chr1:65604078-65604119	-0.263571	0.088944	-0.30341	0.088944	-0.039839	0
chr1:65671486-65671527	-0.0851421	0.22191	-0.0851421	0.22191	0	0
chr1:78946263-78946304	-0.0593589	0.083882	-0.0593589	0.083882	0	0
chr1:92962410-92962451	-0.18066	0.12117	-0.268827	0.12117	-0.088167	0
chr1:108199481-108199522	-0.0946738	0.14616	-0.113781	0.14616	-0.0191072	0
chr1:111183571-111183612	-0.217417	0.12654	-0.220776	0.12654	-0.003359	0
chr1:113761166-113761207	-0.257701	0.08469	-0.257701	0.08469	0	0
chr1:113761166-113761207	-0.257701	0.08469	-0.18615	0.1584	0.071551	0.07371
chr1:117001689-117001730	0.0193043	0.22067	-0.0598124	0.22067	-0.0791167	0
chr1:150384433-150384474	-0.0744557	0.044631	-0.108846	0.047828	-0.0343903	0.003197
chr1:156117395-156117436	-1.00927	0.096243	-0.872445	0.096243	0.136825	0
chr1:156117395-156117436	-1.00927	0.096243	-0.687261	0.096243	0.322009	0
chr1:159204267-159204308	0.301851	0.12117	0.298602	0.12117	-0.003249	0
chr1:159204873-159204914	-0.284539	0.12802	-0.34408	0.12802	-0.059541	0
chr1:159204873-159204914	-0.284539	0.12802	-0.302465	0.12802	-0.017926	0
chr1:159204873-159204914	-0.284539	0.12802	-0.284539	0.12802	0	0
chr1:159205544-159205585	-0.0962083	0.1759	-0.092579	0.075099	0.0036293	-0.100801
chr1:159205544-159205585	-0.0962083	0.1759	-0.0962083	0.1759	0	0
chr1:159205684-159205725	-0.192346	0.090571	-0.198248	0.090571	-0.005902	0
chr1:159205684-159205725	-0.192346	0.090571	-0.192346	0.090571	0	0
chr1:161216493-161216534	-0.165483	0.059785	-0.165483	0.059785	0	0
chr1:161216493-161216534	-0.165483	0.059785	-0.192709	0.059785	-0.027226	0
chr5:132371383-132371424	-0.126772	0.10465	-0.118851	0.069366	0.007921	-0.035284
chr5:177409511-177409552	-0.236776	0.054291	-0.248552	0.21988	-0.011776	0.165589
chr5:177409511-177409552	-0.236776	0.054291	-0.232409	0.054291	0.004367	0
chr6:25801835-25801876	-0.201076	0.061927	-0.197022	0.061927	0.004054	0
chr6:25801835-25801876	-0.201076	0.061927	-0.192942	0.061927	0.008134	0
chr6:25835192-25835233	-0.158019	0.14423	-0.187247	0.14423	-0.029228	0
chr6:25835192-25835233	-0.158019	0.14423	-0.158019	0.14423	0	0
chr6:25841784-25841825	-0.142122	0.10478	-0.163889	0.10478	-0.021767	0
chr6:25841784-25841825	-0.142122	0.10478	-0.168303	0.10478	-0.026181	0
chr6:149807017-149807058	0.0730194	0.22254	0.0308083	0.22254	-0.0422111	0
chr6:159979095-159979136	0.132309	0.39984	0.186854	0.39984	0.054545	0
chr6:160055215-160055256	-0.199144	0.21376	-0.138807	0.043426	0.060337	-0.170334
chr6:160136102-160136143	-0.319965	0.74783	-0.135344	0.74783	0.184621	0
chr7:50558021-50558062	-0.260607	0.071798	-0.10395	0.071798	0.156657	0
chr8:9318522-9318563	0.0390697	0.075536	-0.050608	0.075536	-0.0896777	0
chr8:9326066-9326107	-0.18933	0.11115	-0.149575	0.11115	0.039755	0
chr8:9326066-9326107	-0.18933	0.11115	-0.165213	0.11115	0.024117	0
chr8:10428280-10428321	-0.292908	0.079688	-0.296124	0.079688	-0.003216	0
chr9:7243969-7244010	-0.27992	0.080528	-0.271639	0.049703	0.008281	-0.030825
chr10:16451119-16451160	-0.222128	0.050842	-0.20766	0.050842	0.014468	0
chr10:16451119-16451160	-0.222128	0.050842	-0.280997	0.050842	-0.058869	0
chr10:62094628-62094669	0.0116589	0.20068	-0.055952	0.20068	-0.0676109	0
chr10:87658787-87658828	0.117241	0.15636	0.147589	0.15636	0.030348	0
chr10:95062506-95062547	-0.321152	0.074386	-0.252332	0.24096	0.06882	0.166574
chr10:95144280-95144321	-0.208288	0.12715	-0.230746	0.12715	-0.022458	0
chr10:133371257-133371298	-0.30129	0.077065	-0.376642	0.077065	-0.075352	0
chr10:133371257-133371298	-0.30129	0.077065	-0.30129	0.077065	0	0
chr11:2189408-2189449	-0.237068	0.13145	-0.341897	0.28334	-0.104829	0.15189
chr11:2189408-2189449	-0.237068	0.13145	-0.276114	0.17792	-0.039046	0.04647
chr11:27125557-27125598	-0.211783	0.095034	-0.211783	0.095034	0	0
chr11:27125557-27125598	-0.211783	0.095034	-0.113669	0.095034	0.098114	0
chr2:70999233-70999274	-0.435916	2.7258	-0.547079	2.7258	-0.111163	0
chr2:72150235-72150276	-0.10066	0.14159	-0.0743119	0.13145	0.0263481	-0.01014
chr2:73585739-73585780	-0.18866	0.057082	-0.248151	0.057082	-0.059491	0
chr2:73619620-73619661	0.125527	0.38786	0.0343293	0.38786	-0.0911977	0
chr2:73619620-73619661	0.125527	0.38786	0.0738634	0.38786	-0.0516636	0
chr2:73628360-73628401	-0.338327	0.069946	-0.222723	0.069946	0.115604	0
chr2:73628360-73628401	-0.338327	0.069946	-0.280995	0.085182	0.057332	0.015236
chr2:73631060-73631101	-0.191026	0.08503	-0.144917	0.08503	0.046109	0
chr3:36218014-36218055	-0.0588866	0.055701	-0.0968156	0.081163	-0.037929	0.025462
chr2:73673697-73673738	0.0128832	0.24198	-0.0110237	0.24198	-0.0239069	0
chr2:73696436-73696477	0.586755	2.7258	0.751788	2.7258	0.165033	0
chr2:73708799-73708840	-0.182578	0.061927	-0.181525	0.061927	0.001053	0
chr2:73708799-73708840	-0.182578	0.061927	-0.222173	0.072336	-0.039595	0.010409
chr2:73729699-73729740	-0.448811	0.096243	-0.42599	0.28334	0.022821	0.187097
chr2:135950392-135950433	-0.169392	0.051657	-0.169392	0.051657	0	0
chr2:135950392-135950433	-0.169392	0.051657	-0.147714	0.051657	0.021678	0
chr2:210675763-210675804	0.108472	0.3049	-0.134433	0.10501	-0.242905	-0.19989
chr2:210675763-210675804	0.108472	0.3049	0.108472	0.3049	0	0
chr3:183092336-183092377	-0.25388	0.12299	-0.123001	0.21591	0.130879	0.09292
chr3:196215190-196215231	-0.169122	0.10355	-0.169122	0.10355	0	0
chr3:196215190-196215231	-0.169122	0.10355	-0.0507425	0.10355	0.118379	0
chr4:9983801-9983842	-0.0376323	0.090571	0.0499743	0.090571	0.0876066	0
chr4:88301655-88301696	0.0706066	0.1128	0.113774	0.099215	0.0431674	-0.013585
chr4:88301655-88301696	0.0706066	0.1128	0.0566844	0.099215	-0.0139222	-0.013585
chr4:186242907-186242948	-0.203395	0.08469	-0.21588	0.057892	-0.012485	-0.026798
chr5:1181592-1181633	-0.133063	0.11506	-0.116996	0.11506	0.016067	0
chr5:132369746-132369787	-0.238147	0.072336	-0.253241	0.072336	-0.015094	0
chr5:132369746-132369787	-0.238147	0.072336	-0.238147	0.072336	0	0
chr2:55923709-55923750	-0.253322	0.061757	-0.284058	0.061757	-0.030736	0
chr8:9771223-9771264	-0.145631	0.073547	-0.0703627	0.073547	0.0752683	0
chr15:65063110-65063151	-0.372002	0.10352	-0.371523	0.10352	0.000479	0
chr22:27491490-27491531	-0.165026	0.096485	-0.165026	0.096485	0	0
chr8:11173943-11173984	-0.122906	0.29074	-0.122906	0.29074	0	0
chr8:11173943-11173984	-0.122906	0.29074	-0.160737	0.29074	-0.037831	0
chr14:52138105-52138146	-0.0446166	0.086504	-0.144005	0.057999	-0.0993884	-0.028505
chr11:2698425-2698466	0.0598559	0.096243	0.0598559	0.096243	0	0
chr11:3864261-3864302	-0.12702	0.086876	-0.0548527	0.10352	0.0721673	0.016644
chr11:5670278-5670319	-0.59046	0.29074	-0.442916	0.29074	0.147544	0
chr11:5672297-5672338	-0.440983	0.08222	-0.262609	0.089992	0.178374	0.007772
chr11:5679824-5679865	-0.142386	0.11449	-0.142386	0.11449	0	0
chr11:5679824-5679865	-0.142386	0.11449	-0.178058	0.11449	-0.035672	0
chr11:5680159-5680200	-0.100969	0.21988	-0.0812503	0.21988	0.0197187	0
chr11:5680159-5680200	-0.100969	0.21988	-0.0990809	0.21988	0.0018881	0
chr11:5844328-5844369	-0.0416782	0.19354	-0.227312	0.19354	-0.185634	0
chr11:8824536-8824577	0.12447	0.065368	0.12447	0.065368	0	0
chr11:10652172-10652213	-0.19799	0.061729	-0.269734	0.061729	-0.071744	0
chr11:10652172-10652213	-0.19799	0.061729	-0.191169	0.061729	0.006821	0
chr11:10731418-10731459	-0.0210244	0.15246	-0.0171912	0.15246	0.0038332	0
chr11:17223519-17223560	-0.820259	0.078521	-0.820259	0.078521	0	0
chr11:48058132-48058173	-0.0978586	1.0123	0.0902362	0.18316	0.188095	-0.82914
chr11:57617026-57617067	-0.609346	0.27482	-0.66834	0.27482	-0.058994	0
chr11:58152350-58152391	-0.120212	0.065441	-0.120212	0.065441	0	0
chr11:61803890-61803931	-0.0942764	0.21591	-0.0942764	0.21591	0	0
chr11:61803890-61803931	-0.0942764	0.21591	-0.111723	0.21591	-0.0174466	0
chr11:61803890-61803931	-0.0942764	0.21591	-0.138844	0.21591	-0.0445676	0
chr11:61803890-61803931	-0.0942764	0.21591	-0.124298	0.21591	-0.0300216	0
chr11:61850677-61850718	-0.0742284	0.054585	-0.169698	0.054585	-0.0954696	0
chr11:61850677-61850718	-0.0742284	0.054585	-0.0742284	0.054585	0	0
chr11:61850677-61850718	-0.0742284	0.054585	-0.0821171	0.054652	-0.0078887	6.7e-05
chr11:64210054-64210095	-0.301476	0.097057	-0.29687	0.097057	0.004606	0
chr11:64210054-64210095	-0.301476	0.097057	-0.27286	0.097057	0.028616	0
chr11:65626831-65626872	-0.508415	0.073131	-0.342938	0.073131	0.165477	0
chr11:65626831-65626872	-0.508415	0.073131	-0.362473	0.073131	0.145942	0
chr11:71920059-71920100	-0.783358	0.94046	-0.591416	0.94046	0.191942	0
chr11:72694385-72694426	-0.172648	0.12481	-0.172648	0.12481	0	0
chr11:72729059-72729100	-0.182531	0.10597	-0.222162	0.10597	-0.039631	0
chr11:73236869-73236910	-0.449532	0.070758	-0.525038	0.070758	-0.075506	0
chr11:73236869-73236910	-0.449532	0.070758	-0.519219	0.070758	-0.069687	0
chr11:77827883-77827924	-0.126056	0.12942	-0.126056	0.12942	0	0
chr12:32513291-32513332	-0.0422062	0.11563	-0.0422062	0.11563	0	0
chr12:32696853-32696894	0.758246	2.7258	0.758246	2.7258	0	0
chr12:40156880-40156921	-0.253758	0.081163	-0.307611	0.049857	-0.053853	-0.031306
chr12:40156880-40156921	-0.253758	0.081163	-0.253758	0.081163	0	0
chr12:40207986-40208027	-0.0196353	0.1006	-0.108063	0.1006	-0.0884277	0
chr12:47814565-47814606	-0.20647	0.10502	-0.20647	0.10502	0	0
chr12:47814565-47814606	-0.20647	0.10502	-0.208918	0.10502	-0.002448	0
chr12:47814565-47814606	-0.20647	0.10502	-0.161838	0.10502	0.044632	0
chr12:47820139-47820180	-0.207646	0.056687	-0.234608	0.056687	-0.026962	0
chr12:49258928-49258969	-0.951648	0.094941	-0.650968	0.094941	0.30068	0
chr12:49258928-49258969	-0.951648	0.094941	-0.62116	0.094941	0.330488	0
chr12:51274132-51274173	-0.267751	0.24488	-0.254494	0.24488	0.013257	0
chr12:51326243-51326284	-0.269439	0.20068	-0.318617	0.20068	-0.049178	0
chr12:54318504-54318545	0.150789	0.17067	-0.0903631	0.13478	-0.241152	-0.03589
chr12:54318504-54318545	0.150789	0.17067	-0.193764	0.13478	-0.344553	-0.03589
chr12:54336068-54336109	-0.220509	0.05973	-0.222457	0.05973	-0.001948	0
chr12:54336068-54336109	-0.220509	0.05973	-0.220509	0.05973	0	0
chr12:56625639-56625680	-0.352086	0.11449	-0.277849	0.11449	0.074237	0
chr12:56625639-56625680	-0.352086	0.11449	-0.345078	0.11449	0.007008	0
chr12:56703251-56703292	1.29004	2.6855	0.634977	2.6855	-0.655063	0
chr12:64611279-64611320	-0.136677	0.069631	-0.141139	0.069631	-0.004462	0
chr12:64611279-64611320	-0.136677	0.069631	-0.136677	0.069631	0	0
chr12:64622366-64622407	-0.128208	0.061927	-0.128208	0.061927	0	0
chr12:64634303-64634344	-0.583789	0.075532	-0.615522	0.10465	-0.031733	0.029118
chr12:64644215-64644256	-0.169018	0.083468	-0.20197	0.044996	-0.032952	-0.038472
chr12:108873413-108873454	-0.267308	0.072336	-0.317568	0.072336	-0.05026	0
chr12:109582296-109582337	-0.363084	0.072133	-0.363084	0.072133	0	0
chr12:114920353-114920394	-0.124954	0.12242	-0.0720874	0.12242	0.0528666	0
chr12:114920353-114920394	-0.124954	0.12242	-0.106365	0.12242	0.018589	0
chr12:117040943-117040984	-0.23442	0.058764	-0.23442	0.058764	0	0
chr12:121748342-121748383	-0.294467	0.14511	-0.294467	0.14511	0	0
chr12:121778984-121779025	-0.278927	0.11505	-0.254281	0.11505	0.024646	0
chr12:121778984-121779025	-0.278927	0.11505	-0.320013	0.11505	-0.041086	0
chr11:86055289-86055330	-0.673398	0.070066	-0.571142	0.070066	0.102256	0
chr11:95099838-95099879	-0.0715612	0.094961	-0.134286	0.094961	-0.0627248	0
chr11:108443615-108443656	-0.407593	0.10501	-0.359279	0.11031	0.048314	0.0053
chr11:114082880-114082921	-0.177177	0.052422	-0.195545	0.052422	-0.018368	0
chr11:114082880-114082921	-0.177177	0.052422	-0.234181	0.052422	-0.057004	0
chr11:114111579-114111620	-0.122406	0.16383	-0.205019	0.16383	-0.082613	0
chr11:114217296-114217337	0.0720514	0.21386	0.0721049	0.21386	5.35e-05	0
chr11:114217296-114217337	0.0720514	0.21386	0.0720514	0.21386	0	0
chr11:116964627-116964668	0.327875	2.7258	0.138148	2.7258	-0.189727	0
chr11:117302084-117302125	0.274358	2.7258	0.0151999	2.7258	-0.259158	0
chr11:117302084-117302125	0.274358	2.7258	0.0935145	2.7258	-0.180843	0
chr11:122649830-122649871	0.959705	2.7258	0.524226	0.74922	-0.435479	-1.97658
chr11:122649830-122649871	0.959705	2.7258	0.567164	0.74922	-0.392541	-1.97658
chr11:125753271-125753312	-0.743872	0.30159	-0.609542	0.30159	0.13433	0
chr11:126415386-126415427	-0.143299	0.075674	-0.181531	0.075674	-0.038232	0
chr11:126415386-126415427	-0.143299	0.075674	-0.140912	0.075674	0.002387	0
chr11:129290413-129290454	-0.228524	0.083882	-0.228524	0.083882	0	0
chr12:630823-630864	-0.309057	0.059127	-0.291748	0.059127	0.017309	0
chr12:630823-630864	-0.309057	0.059127	-0.309057	0.059127	0	0
chr12:6019257-6019298	-0.250742	0.075607	-0.313586	0.053218	-0.062844	-0.022389
chr12:6019257-6019298	-0.250742	0.075607	-0.227058	0.058309	0.023684	-0.017298
chr12:6054952-6054993	-0.15923	0.10352	-0.0852501	0.10352	0.0739799	0
chr12:6179881-6179922	-0.370017	0.094941	-0.257634	0.094941	0.112383	0
chr12:6182706-6182747	-0.166904	0.1501	-0.243635	0.1501	-0.076731	0
chr12:6223652-6223693	-0.152382	0.099215	-0.152382	0.099215	0	0
chr12:6223652-6223693	-0.152382	0.099215	-0.134406	0.095428	0.017976	-0.003787
chr12:7999548-7999589	0.4786	1.0123	0.393765	1.0123	-0.084835	0
chr12:21529285-21529326	-0.134298	0.083882	-0.11744	0.083882	0.016858	0
chr12:27253794-27253835	-0.245339	0.07478	-0.269491	0.07478	-0.024152	0
chr12:27253794-27253835	-0.245339	0.07478	-0.224407	0.07478	0.020932	0
chr12:29278301-29278342	-0.315959	0.10355	-0.265537	0.10355	0.050422	0
chr12:29284264-29284305	-0.174534	0.12242	-0.198644	0.12242	-0.02411	0
chr12:29284264-29284305	-0.174534	0.12242	-0.174534	0.12242	0	0
chr1:29090108-29090149	0.174273	0.38786	0.147158	0.28334	-0.027115	-0.10452
chr1:35578678-35578719	-0.0466567	0.087067	0.0276477	0.14423	0.0743044	0.057163
chr1:37466257-37466298	-0.273842	0.078387	-0.189297	0.11031	0.084545	0.031923
chr1:42961527-42961568	0.00564697	0.73713	-0.151698	0.16383	-0.157345	-0.5733
chr1:42957931-42957972	-0.14189	0.30159	-0.14189	0.30159	0	0
chr1:43612388-43612429	0.00184265	0.24096	-0.00766242	0.070758	-0.00950507	-0.170202
chr1:47213566-47213607	-0.282754	0.061729	-0.238253	0.096485	0.044501	0.034756
chr1:50819769-50819810	0.358433	0.19354	0.329227	0.19354	-0.029206	0
chr1:52868106-52868147	1.23597	0.59866	1.23597	0.59866	0	0
chr1:62438692-62438733	0.0379468	0.15246	-0.0159116	0.15246	-0.0538584	0
chr1:63435737-63435778	-0.145973	0.10268	-0.130686	0.10268	0.015287	0
chr1:77499150-77499191	0.0709629	2.7258	-0.13711	0.13145	-0.208073	-2.59435
chr1:92839007-92839048	-0.685694	0.051657	-0.745513	0.051657	-0.059819	0
chr1:110368825-110368866	0.0610219	0.18789	0.0610219	0.18789	0	0
chr1:111138769-111138810	-0.44912	0.050842	-0.187346	0.050842	0.261774	0
chr1:114390223-114390264	-0.281292	0.060797	-0.191773	0.060797	0.089519	0
chr1:114390223-114390264	-0.281292	0.060797	-0.199203	0.089992	0.082089	0.029195
chr1:150905604-150905645	-0.296556	0.051385	-0.296556	0.051385	0	0
chr1:154115762-154115803	-0.231612	0.072912	-0.280427	0.072912	-0.048815	0
chr1:154162949-154162990	0.520062	0.38786	0.660142	0.38786	0.14008	0
chr1:158643504-158643545	-0.259448	0.04442	-0.390323	0.048347	-0.130875	0.003927
chr1:158626628-158626669	-0.296204	0.14616	-0.296204	0.14616	0	0
chr1:158575444-158575485	-0.541152	0.059356	-0.454287	0.059356	0.086865	0
chr1:158604977-158605018	0.0396479	0.081233	0.0396479	0.081233	0	0
chr1:158621174-158621215	-0.078973	0.078521	-0.0815274	0.078521	-0.0025544	0
chrX:40985472-40985513	-0.129582	0.094941	-0.157411	0.094941	-0.027829	0
chrX:54870244-54870285	-0.258719	0.095428	-0.247529	0.095428	0.01119	0
[truncated: 234,533+ more rows]

## Sheet: NKX2-5 GWAS Traits
chr	start	end	gkm_ref_score_ref	minseq_ref_score_ref	gkm_alt_score_alt	minseq_alt_score_alt	delta_gkm	delta_minseq	CHR_ID.x	CHR_POS.x	REGION	CHR_ID.y	CHR_POS.y	SNPS	DISEASE/TRAIT	MAPPED_TRAIT
[truncated: 272 more rows]

[truncated: 2 more sheets: GATA4 GWAS Traits, TBX5 GWAS Traits]
