# Supplementary material for: Global Evaluation of Congenital Heart Disease-Associated Non-Coding Variants
Source: bioRxiv preprint, doi:10.64898/2025.12.02.691900, version 2 (2025-12-10)
Supplement: Supplemental Data 3 [file 691900_file04.xlsx]

## Sheet: Readme
Sheet_name	Description
CHD MPRA Library	All oligos used for massivelly parallelel reporter assay
MPRA counts	oligo count of plasmid DNA and RNA barcodes of biological triplicates
MPRA fold change	allelic RNA: plasmid DNA ratios with normalization and significance
list of MPRA enAlleles	alleles with enhancer activity (enAlleles) as determined a by >1.5 RNA:plasmid DNA ratio
HE_enAlleles	enAlleles within cardiac enhancers (dickel et al. 2021 nature communications)
HF_enAlleles	enAlleles within cardiac Dnase I genomic footprints (vierstra et al. 2020 nature)
Heart_CRE_enAlleles	enAlleles within cardiac Dnase I genomic footprints and enhancers (from HE_enAlleles and HF_enAlleles)
RELI_enAllele	Reli analysis for TF ChIP-seq peak overlap for enAlleles
RELI_HE_enAllele	Reli analysis for TF ChIP-seq peak overlap for HE_enAlleles
RELI_HF_enAllele	Reli analysis for TF ChIP-seq peak overlap for HF_enAlleles
RELI_heart_CRE_enAllele	Reli analysis for TF ChIP-seq peak overlap for Heart_CRE_enAlleles
HOMER_enAllele	HOMER analysis for TF motif enrichment for enAlleles
HOMER_HE_enAllele	HOMER analysis for TF motif enrichment for HE_enAlleles
HOMER_HF_enAllele	HOMER analysis for TF motif enrichment for HF_enAlleles
HOMER_heart_CRE_enAllele	HOMER analysis for TF motif enrichment for Heart_CRE_enAlleles

## Sheet: HOMER_heart_CRE_enAllele
Motif Name	Consensus	P-value	Log P-value	q-value (Benjamini)	# of Target Sequences with Motif(of 55)	% of Target Sequences with Motif	# of Background Sequences with Motif(of 10777)	% of Background Sequences with Motif
M08353_3.00:CTCF	GCCACYAGGGGGCGCYVB	1e-17	-40.86	0	12	21.43%	38.8	0.31%
M08365_3.00:CTCF	GGCCACYAGRKGGCRCYV	1e-17	-40.86	0	12	21.43%	38.8	0.31%
M08378_3.00:CTCF	TGGCCACYAGRGGGCRSY	1e-17	-40.86	0	12	21.43%	38.8	0.31%
M10008_3.00:CTCFL	GCCRSCAGGGGGCGCYV	1e-17	-40.08	0	12	21.43%	41.6	0.33%
M08367_3.00:CTCF	ASYGCCATCTAGTGG	1e-17	-39.59	0	12	21.43%	43.3	0.35%
M08322_3.00:CTCF	CCACYAGRGGGCGCY	1e-16	-38.96	0	14	25.00%	90.2	0.72%
M11276_3.00:CTCF	NNNYNGCCACYAGRKGGCRC	1e-16	-38.23	0	12	21.43%	49	0.39%
M08342_3.00:CTCF	GCCACCAGGGGGCGC	1e-16	-38.02	0	12	21.43%	50.8	0.40%
M08343_3.00:CTCF	GCCACCAGGGGGCGC	1e-16	-38.02	0	12	21.43%	50.8	0.40%
M08352_3.00:CTCF	CCACCAGGGGGCGCYVS	1e-16	-38.02	0	12	21.43%	50.8	0.40%
M08364_3.00:CTCF	CCACYAGRKGGCRSYRKH	1e-16	-38.02	0	12	21.43%	50.1	0.40%
M08332_3.00:CTCF	CCACCAGGGGGCGCY	1e-16	-37.41	0	12	21.43%	53.7	0.43%
M08335_3.00:CTCF	CCACCAGGGGGCGCY	1e-16	-37.41	0	12	21.43%	53.7	0.43%
M08321_3.00:CTCF	CCACCAGGGGGCGCYR	1e-16	-37.02	0	12	21.43%	55	0.44%
M08354_3.00:CTCF	CCACCAGGGGGCGCY	1e-16	-37.02	0	12	21.43%	55	0.44%
M07971_3.00:CTCF	GCCASYAGGKGGCRS	1e-16	-36.88	0	14	25.00%	107	0.85%
M08323_3.00:CTCF	CACCAGGGGGCGCYRK	1e-15	-36.83	0	12	21.43%	56.9	0.45%
M08374_3.00:CTCF	GCCACYAGRKGGCRSYR	1e-15	-36.45	0	12	21.43%	58.5	0.47%
M08358_3.00:CTCF	CCACCAGGGGGCGCYVB	1e-15	-35.92	0	12	21.43%	62	0.49%
M08377_3.00:CTCF	CCACCAGRGGGCGCY	1e-15	-35.74	0	12	21.43%	62.8	0.50%
M08382_3.00:CTCF	CCACCAGRGGGCGCY	1e-15	-35.74	0	12	21.43%	62.8	0.50%
M08383_3.00:CTCF	CCACCAGGGGGCGCY	1e-15	-35.74	0	12	21.43%	62.8	0.50%
M08330_3.00:CTCF	CCACCAGGKGGCRSY	1e-15	-35.4	0	12	21.43%	64.6	0.51%
M08351_3.00:CTCF	GCCACCAGRKGGCRS	1e-15	-34.59	0	12	21.43%	69.1	0.55%
M08372_3.00:CTCF	GCCACCAGRKGGCRC	1e-15	-34.59	0	12	21.43%	69.1	0.55%
M08350_3.00:CTCF	CCACYAGRGGGCRCY	1e-14	-34.29	0	12	21.43%	71.5	0.57%
M08376_3.00:CTCF	CCACCAGGGGGCGC	1e-14	-33.84	0	12	21.43%	74.7	0.60%
M10964_3.00:ARNTL	AGCCACGTGA	1e-14	-33.13	0	12	21.43%	79.5	0.63%
M08734_3.00:CTCF	GCCACYAGGGGGCRC	1e-13	-31.84	0	12	21.43%	89.4	0.71%
M08326_3.00:CTCF	GCCACYAGRGGGCRS	1e-13	-31.71	0	12	21.43%	90.3	0.72%
M08375_3.00:CTCF	GCCACYAGRKGGCRS	1e-13	-31.71	0	12	21.43%	90.3	0.72%
M08355_3.00:CTCF	CCACYAGRKGGCRST	1e-13	-31.12	0	12	21.43%	95.5	0.76%
M08359_3.00:CTCF	CCACYAGRGGG	1e-13	-31.03	0	20	35.71%	505.4	4.03%
M04345_3.00:FERD3L	GCRCCATATGTTAC	1e-13	-30.8	0	8	14.29%	15.3	0.12%
M08380_3.00:CTCF	CCACCAGGGGGCG	1e-13	-30.13	0	12	21.43%	104.3	0.83%
M11323_3.00:CTCFL	AGGGGGCGC	1e-12	-28.85	0	16	28.57%	301.6	2.40%
M08360_3.00:CTCF	CCACYAGRGGGCRSY	1e-12	-28.74	0	12	21.43%	118.1	0.94%
M08605_3.00:CTCF	CCACYAGRGGGCRCY	1e-12	-28.11	0	12	21.43%	125.7	1.00%
M08325_3.00:CTCF	RCCACYAGRKGGC	1e-11	-26.86	0	12	21.43%	140.8	1.12%
M04743_3.00:KLF13:KLF9	RGKGGGCGTGGYN	1e-11	-26.69	0	16	28.57%	349.4	2.78%
M01889_3.00:ATF3:JDP2	ACGTCATC	1e-11	-26.2	0	16	28.57%	361.4	2.88%
M08340_3.00:CTCF	CACCAGRKGGCR	1e-11	-25.74	0	12	21.43%	155.2	1.24%
M01574_3.00:EHF:ELF1:ELF2:ELF3:ELF4:ELF5:ELK1:ELK3:ELK4:ERF:ERG:ETS1:ETS2:ETV1:ETV2:ETV3:ETV3L:ETV4:ETV5:ETV6:ETV7:FEV:FLI1:GABPA:SPDEF	DNCCGGAAGT	1e-11	-25.55	0	34	60.71%	2380.5	18.97%
M08348_3.00:CTCF	CCACYAGRKGGCR	1e-11	-25.53	0	12	21.43%	158.4	1.26%
M08361_3.00:CTCF	CCACYAGRKGGCG	1e-11	-25.53	0	12	21.43%	158.4	1.26%
M09002_3.00:SIX1:SIX2:SIX4:SIX5	GGAGTTGT	1e-10	-25.1	0	28	50.00%	1567.1	12.49%
M02228_3.00:NKX6-1:NKX6-2:NKX6-3	TTAATDGVN	1e-10	-25.1	0	30	53.57%	1831.8	14.60%
M01557_3.00:ELF5:SPI1:SPIB:SPIC	ADGVGGAAGT	1e-10	-25.01	0	36	64.29%	2749.3	21.91%
M11508_3.00:YY1	RTAATGG	1e-10	-24.99	0	46	82.14%	4740.8	37.78%
M11282_3.00:CTCF	CCRCNAGGKGGCRSTV	1e-10	-24.92	0	12	21.43%	167.7	1.34%
M10177_3.00:EHF:ELF1:ELF2:ELF3:ELF4:ELF5:ETV6:ETV7:SPI1:SPIC	GGAASSAGGAAGTGR	1e-10	-24.4	0	12	21.43%	175.2	1.40%
M01809_3.00:HES7	GGCACGCGYC	1e-10	-24.3	0	18	32.14%	563.8	4.49%
M04223_3.00:ATF6:ATF6B	TAGTCACGTGK	1e-10	-24.29	0	6	10.71%	9.7	0.08%
M04376_3.00:OLIG2:OLIG3	AACAGCTGYT	1e-10	-23.79	0	14	25.00%	294.5	2.35%
M08244_3.00:USF2	GGGTCACGTGRCCSSG	1e-10	-23.39	0	6	10.71%	11	0.09%
M08266_3.00:USF1:USF2	GGGTCACGTGRCSSS	1e-10	-23.39	0	6	10.71%	11	0.09%
M01573_3.00:EHF:ELF1:ELF2:ELF3:ELF4:ELF5:ETV6:ETV7	DNSCGGAART	1e-09	-22.99	0	34	60.71%	2603.7	20.75%
M06042_3.00:BATF2	HNRCGTCATCN	1e-09	-22.75	0	20	35.71%	803.1	6.40%
M08265_3.00:USF1:USF2	SSSSGYCACGTGACC	1e-09	-22.61	0	6	10.71%	13.3	0.11%
M09879_3.00:USF1:USF2	GGYCACGTGACCC	1e-09	-22.61	0	6	10.71%	13.8	0.11%
M04498_3.00:CREB3L2:CREB3L4	YGCCACGTCACC	1e-09	-22.26	0	6	10.71%	14.1	0.11%
M12488_3.00:STAT6	RGGAARKC	1e-09	-22.12	0	56	100.00%	8445.2	67.30%
M10285_3.00:BARX1:BARX2:BSX:EMX1:EMX2:EN1:EN2:EVX1:EVX2:GBX1:GBX2:GSX1:GSX2:HMX1:HMX2:HMX3:HOXA1:HOXA2:HOXA3:HOXA4:HOXA5:HOXA6:HOXA7:HOXB1:HOXB2:HOXB3:HOXB4:HOXB5:HOXB6:HOXB7:HOXB8:HOXC4:HOXC5:HOXC6:HOXD1:HOXD3:HOXD4:HOXD8:ISX:MEOX1:MEOX2:MNX1:NKX1-1:NKX1-2:NOTO:OTP:PDX1:TLX2:VAX1:VAX2:VENTX	YTAATGRC	1e-09	-21.88	0	28	50.00%	1796.8	14.32%
M10327_3.00:BARX1:BARX2:BSX:EMX1:EMX2:EN1:EN2:EVX1:EVX2:GBX1:GBX2:GSX1:GSX2:HMX1:HMX2:HMX3:HOXA1:HOXA2:HOXA3:HOXA4:HOXA5:HOXA6:HOXA7:HOXB1:HOXB2:HOXB3:HOXB4:HOXB5:HOXB6:HOXB7:HOXB8:HOXC4:HOXC5:HOXC6:HOXD1:HOXD3:HOXD4:HOXD8:ISX:MEOX1:MEOX2:MNX1:NKX1-1:NKX1-2:NOTO:OTP:PDX1:TLX2:VAX1:VAX2:VENTX	YTAATGRC	1e-09	-21.88	0	28	50.00%	1796.8	14.32%
M08363_3.00:CTCF	CACYAGRGGGCR	1e-09	-21.36	0	12	21.43%	231.9	1.85%
M01558_3.00:EHF:ELF1:ELF2:ELF3:ELF4:ELF5:ETV6:ETV7	DNVMGGAART	1e-09	-21.23	0	48	85.71%	5727.9	45.64%
M02745_3.00:MITF:TFE3	GTCACGTGAC	1e-09	-21.03	0	6	10.71%	18.9	0.15%
M08247_3.00:USF2	GGTCACGTGRCCV	1e-09	-21.03	0	6	10.71%	18.8	0.15%
M08267_3.00:USF1:USF2	CSBSGYCACGTGACC	1e-09	-21.03	0	6	10.71%	18.8	0.15%
M08269_3.00:USF1:USF2	SGGTCACGTGRCCV	1e-09	-21.03	0	6	10.71%	18.8	0.15%
M04247_3.00:ATF6:ATF6B	GTGACGTCATC	1e-08	-20.5	0	6	10.71%	20.3	0.16%
M09856_3.00:USF1:USF2	GGTCACGTGRCC	1e-08	-20.5	0	6	10.71%	20.6	0.16%
M03750_3.00:EOMES:TBR1:TBX21	GGTGTGAWWTCACACC	1e-08	-20.17	0	4	7.14%	1.1	0.01%
M10492_3.00:RUNX1:RUNX2:RUNX3	KYTGTGGTTT	1e-08	-20.12	0	16	28.57%	552.8	4.40%
M04961_3.00:EHF:ELF1:ELF2:ELF3:ELF4:ELF5:ETV6:ETV7:SPI1:SPIC	AACVAGGAAGTR	1e-08	-20.11	0	12	21.43%	259.3	2.07%
M10948_3.00:HES1:HES4	GGCKCGTGSC	1e-08	-19.91	0	18	32.14%	743.3	5.92%
M03909_3.00:KLF15	GKGGGYGTGGY	1e-08	-19.85	0	16	28.57%	563.8	4.49%
M08178_3.00:ZNF783	GGMCGCSG	1e-08	-19.56	0	10	17.86%	161	1.28%
M08268_3.00:USF1:USF2	GYCACGTGACC	1e-08	-19.56	0	6	10.71%	24.8	0.20%
M11293_3.00:GLIS3	CAGCWGGGGGSRW	1e-08	-19.48	0	14	25.00%	414.9	3.31%
M05997_3.00:EOMES:TBR1:TBX21	DAGGTGTGAA	1e-08	-19.45	0	16	28.57%	579.4	4.62%
M00210_3.00:ELF5:SPI1:SPIB:SPIC	WDRVGGAAST	1e-08	-19.42	0	40	71.43%	4100.2	32.67%
M00828_3.00:XBP1	NHACGTCABN	1e-08	-19.32	0	34	60.71%	2971.6	23.68%
M09322_3.00:ZNF813	RRKGAAGGARRGGGNNV	1e-08	-19.27	0	12	21.43%	280.3	2.23%
M11387_3.00:SP1:SP3:SP4:SP5:SP6:SP8:SP9	AGCCTTGGGGAGGG	1e-08	-19.17	0	10	17.86%	167.5	1.33%
M08243_3.00:USF2	SCSSGYCACGTGACC	1e-08	-19.15	0	6	10.71%	26.7	0.21%
M02746_3.00:USF2	GTCACGTGAC	1e-08	-18.95	0	6	10.71%	27.7	0.22%
M08664_3.00:MITF:TFE3:TFEB:TFEC	GTCACGTGAC	1e-08	-18.95	0	6	10.71%	27.5	0.22%
M01083_3.00:JUN:JUNB:JUND	DTGMGTCAT	1e-08	-18.85	0	28	50.00%	2049.6	16.33%
M04333_3.00:CLOCK	GMCACGTGYN	1e-08	-18.67	0	12	21.43%	296.9	2.37%
M02247_3.00:NKX6-1:NKX6-2:NKX6-3	NTTAATNGN	1e-08	-18.67	0	40	71.43%	4197.2	33.45%
M01887_3.00:FOS:FOSB:FOSL1:FOSL2	DTGMGTCATNN	1e-08	-18.64	0	24	42.86%	1507	12.01%
M04963_3.00:EHF:ELF1:ELF2:ELF3:ELF4:ELF5:ETV6:ETV7:SPI1:SPIC	AASGAGGAAGTR	1e-08	-18.63	0	12	21.43%	297.7	2.37%
M06067_3.00:ZNF746	RGGGNVNRDAGKAGGGAGGG	1e-08	-18.49	0	10	17.86%	180.4	1.44%
M04541_3.00:FOS:FOSB:FOSL1:FOSL2	GATGACGTCATC	1e-07	-18.39	0	6	10.71%	30.8	0.25%
M01830_3.00:NEUROG1	RMCATATGGT	1e-07	-18.17	0	16	28.57%	635.3	5.06%
M08280_3.00:ATF3:JDP2	GYCACGTGACC	1e-07	-18.05	0	6	10.71%	32.2	0.26%
M08251_3.00:MAX	DGCACGTGGCY	1e-07	-17.83	0	12	21.43%	320.6	2.56%
M08246_3.00:USF2	GGTCACGTGRCSV	1e-07	-17.73	0	6	10.71%	34.1	0.27%
M06011_3.00:EOMES:TBR1:TBX21:TBX5	DAGGTGTGAA	1e-07	-17.72	0	16	28.57%	656.4	5.23%
M08975_3.00:MXI1	CCACGTGG	1e-07	-17.61	0	14	25.00%	482.1	3.84%
M01892_3.00:ATF3:JDP2	TKACGTCATN	1e-07	-17.58	0	24	42.86%	1591.7	12.68%
M03019_3.00:MLX	ATCACGTGAT	1e-07	-17.58	0	6	10.71%	35.3	0.28%
M11812_3.00:HOXA13:HOXB13:HOXC13:HOXD13	WYTAATAAWAC	1e-07	-17.56	0	14	25.00%	484.4	3.86%
M04862_3.00:KLF14:KLF16	GGKGGGCGTGGYG	1e-07	-17.45	0	16	28.57%	669.3	5.33%
M02931_3.00:MITF:TFEB	RTCACGTGAY	1e-07	-17.42	0	6	10.71%	36.1	0.29%
M09841_3.00:MITF:TFEB	RGTCACGTG	1e-07	-17.28	0	6	10.71%	37.2	0.30%
M09876_3.00:MITF:TFEB	RGTCACGTG	1e-07	-17.28	0	6	10.71%	37.2	0.30%
M09832_3.00:MITF:TFE3	GGTCACGTGA	1e-07	-17.13	0	6	10.71%	38.5	0.31%
M09866_3.00:MITF:TFE3:TFEB:TFEC	GGTCACGTGA	1e-07	-17.13	0	6	10.71%	38.5	0.31%
M08913_3.00:MYB:MYBL1	CAACTG	1e-07	-17.03	0	18	32.14%	897.4	7.15%
M00308_3.00:FOXC1:FOXC2:FOXD1:FOXD2:FOXD3:FOXD4:FOXD4L1:FOXD4L3:FOXD4L4:FOXD4L5:FOXD4L6:FOXE1:FOXF1:FOXF2:FOXG1:FOXI1:FOXI3:FOXK2:FOXL1:FOXL2:FOXP4:FOXS1	TTDTTTATACA	1e-07	-16.94	0	14	25.00%	509	4.06%
M10047_3.00:HIC1	GGGCAACCC	1e-07	-16.83	0	18	32.14%	909.1	7.24%
M10126_3.00:HIC2	GGGCAACCC	1e-07	-16.83	0	18	32.14%	909.1	7.24%
M08283_3.00:ATF3:JDP2	TCACGTSACC	1e-07	-16.6	0	12	21.43%	359.1	2.86%
M04947_3.00:EHF:ELF1:ELF2:ELF3:ELF4:ELF5:ELK1:ELK3:ELK4:ERF:ERG:ETS1:ETS2:ETV1:ETV2:ETV3:ETV3L:ETV4:ETV5:ETV6:ETV7:FEV:FLI1:GABPA:SPDEF	RABSCGGAAGTG	1e-07	-16.55	0	12	21.43%	362	2.88%
M10958_3.00:MAX	RRAHCACGTGDTYY	1e-07	-16.47	0	6	10.71%	43.9	0.35%
M10990_3.00:USF1:USF2	RGRYCACGTGRYCY	1e-07	-16.47	0	6	10.71%	43.6	0.35%
M06039_3.00:MGA	DAGGTGTGAADWNKNNCRCS	1e-07	-16.45	0	4	7.14%	6.2	0.05%
M01077_3.00:JUN:JUNB:JUND	WTGMGTCAT	1e-07	-16.31	0	34	60.71%	3324.7	26.49%
M02983_3.00:MLX	ATCACGTGAT	1e-07	-16.22	0	6	10.71%	45.4	0.36%
M04472_3.00:BATF:BATF3	GATGACGTCATC	1e-07	-16.22	0	6	10.71%	45.4	0.36%
M12478_3.00:STAT5A	NAWTTCYNGGAAATN	1e-07	-16.22	0	6	10.71%	45.7	0.36%
M11053_3.00:ATF1:CREB1:CREM	ACGTCABC	1e-07	-16.14	0	26	46.43%	2006.4	15.99%
M00415_3.00:POU4F3	TGMATAH	1e-06	-16.1	0	42	75.00%	4995.8	39.81%
M05481_3.00:BARX1:BARX2:BSX:EMX1:EMX2:EN1:EN2:EVX1:EVX2:GBX1:GBX2:GSX1:GSX2:HMX1:HMX2:HMX3:HOXA1:HOXA2:HOXA3:HOXA4:HOXA5:HOXA6:HOXA7:HOXB1:HOXB2:HOXB3:HOXB4:HOXB5:HOXB6:HOXB7:HOXB8:HOXC4:HOXC5:HOXC6:HOXD1:HOXD3:HOXD4:HOXD8:ISX:MEOX1:MEOX2:MNX1:NKX1-1:NKX1-2:NOTO:OTP:PDX1:TLX2:VAX1:VAX2:VENTX	BTAATGAB	1e-06	-16.1	0	26	46.43%	2010.9	16.02%
M10976_3.00:MYC	GCCACGTG	1e-06	-15.91	0	24	42.86%	1736.8	13.84%
M12497_3.00:EOMES:TBX2:TBX20:TBX3:TBX4:TBX5	DDAGGTGTBANA	1e-06	-15.88	0	16	28.57%	751.2	5.99%
M00211_3.00:EHF:ELF1:ELF2:ELF3:ELF4:ELF5:ETV6:ETV7	ANVMGGAART	1e-06	-15.78	0	38	67.86%	4176.1	33.28%
M11540_3.00:ONECUT1:ONECUT2:ONECUT3	TATTGA	1e-06	-15.76	0	22	39.29%	1473.2	11.74%
M04532_3.00:FOS:FOSB:FOSL1:FOSL2	GATGACRTCATC	1e-06	-15.76	0	6	10.71%	49	0.39%
M10594_3.00:LYL1:TAL1:TAL2	CAGCTGBT	1e-06	-15.62	0	40	71.43%	4622.8	36.84%
M04933_3.00:EHF:ELF1:ELF2:ELF3:ELF4:ELF5:ELK1:ELK3:ELK4:ERF:ERG:ETS1:ETS2:ETV1:ETV2:ETV3:ETV3L:ETV4:ETV5:ETV6:ETV7:FEV:FLI1:GABPA:SPDEF	AATSCGGAAGTR	1e-06	-15.54	0	6	10.71%	51	0.41%
M06383_3.00:BHLHE22:BHLHE23	GACAGATGT	1e-06	-15.49	0	14	25.00%	574.4	4.58%
M08245_3.00:USF2	GYCACGTGACC	1e-06	-15.44	0	6	10.71%	52.9	0.42%
M04282_3.00:MITF:TFEC	BGTCACGTGBK	1e-06	-15.33	0	6	10.71%	53.5	0.43%
M08262_3.00:MYC	NGCCACGTGST	1e-06	-15.31	0	12	21.43%	406.3	3.24%
M06229_3.00:JUN:JUNB:JUND	VBDATGACGTCATCHAK	1e-06	-15.23	0	6	10.71%	54.4	0.43%
M09489_3.00:ZNF594	GRGGTGAGAGCSGCK	1e-06	-15.23	0	6	10.71%	54.3	0.43%
M10753_3.00:RUNX1:RUNX2:RUNX3	NNHTGTGGTTWN	1e-06	-15.21	0	20	35.71%	1257.2	10.02%
M03125_3.00:SP1:SP3:SP4:SP5:SP8:SP9	GKGGGCGKGGY	1e-06	-15.21	0	22	39.29%	1520.1	12.11%
M04932_3.00:EHF:ELF1:ELF2:ELF3:ELF4:ELF5:ELK1:ELK3:ELK4:ERF:ERG:ETS1:ETS2:ETV1:ETV2:ETV3:ETV3L:ETV4:ETV5:ETV6:ETV7:FEV:FLI1:GABPA:SPDEF	AACCAGGAAGTR	1e-06	-15.13	0	6	10.71%	55.6	0.44%
M08232_3.00:ZNF705EP	NVGVGRGGGNGAGGGAYNNN	1e-06	-15.1	0	10	17.86%	262.4	2.09%
M01078_3.00:CEBPG	NTTRCGCAATN	1e-06	-15.1	0	8	14.29%	141.5	1.13%
M01891_3.00:FOS:FOSB:FOSL1:FOSL2	RCGTCATC	1e-06	-15.09	0	16	28.57%	797.3	6.35%
M00829_3.00:ATF3:JDP2	NCGTCATCV	1e-06	-14.94	0	26	46.43%	2128.5	16.96%
M03830_3.00:SREBF1:SREBF2	ATCACGTGAY	1e-06	-14.93	0	6	10.71%	57.1	0.45%
M06382_3.00:BHLHE22:BHLHE23	GACAGATGGTVVGKT	1e-06	-14.93	0	6	10.71%	57.9	0.46%
M10251_3.00:ISL1:ISL2:NOTO:SHOX:SHOX2:VSX1	SCTAATGGV	1e-06	-14.91	0	30	53.57%	2785.1	22.19%
M10332_3.00:ISL1:ISL2:NOTO:SHOX:SHOX2:VSX1	SCTAATGGV	1e-06	-14.91	0	30	53.57%	2785.1	22.19%
M08282_3.00:ATF3:JDP2	GTCACGTGACC	1e-06	-14.84	0	6	10.71%	58.1	0.46%
M10975_3.00:MYC	VGCCACGTGCB	1e-06	-14.83	0	12	21.43%	425.4	3.39%
M12386_3.00:RUNX1:RUNX2:RUNX3	ACCACA	1e-06	-14.67	0	34	60.71%	3540.6	28.21%
M01901_3.00:NFIL3	TKACGTAATM	1e-06	-14.61	0	12	21.43%	434.7	3.46%
M11825_3.00:ALX1:ALX3:ALX4:ARX:BARHL1:BARHL2:BARX1:BARX2:BSX:DLX1:DLX2:DLX3:DLX4:DLX5:DLX6:DRGX:EMX1:EMX2:EN1:EN2:ESX1:EVX1:EVX2:GBX1:GBX2:GSX1:GSX2:HMX1:HMX2:HMX3:HOXA1:HOXA2:HOXA3:HOXA4:HOXA5:HOXA6:HOXA7:HOXB1:HOXB2:HOXB3:HOXB4:HOXB5:HOXB6:HOXB7:HOXB8:HOXC4:HOXC5:HOXC6:HOXD1:HOXD3:HOXD4:HOXD8:ISX:LHX3:LHX4:MEOX1:MEOX2:MIXL1:MNX1:MSX1:MSX2:NANOG:NANOGP8:NKX1-1:NKX1-2:NOBOX:NOTO:OTP:PDX1:PHOX2A:P…	CCTATTAATG	1e-06	-14.59	0	4	7.14%	11.4	0.09%
M09484_3.00:EGR1:EGR2:EGR3:EGR4	GHGGGGGCG	1e-06	-14.56	0	22	39.29%	1578.5	12.58%
M00180_3.00:ATF3:JDP2	NBRCGTCAYH	1e-06	-14.48	0	26	46.43%	2178.3	17.36%
M08281_3.00:ATF3:JDP2	GTCACGTGACC	1e-06	-14.48	0	6	10.71%	62.2	0.50%
M04198_3.00:TBX15:TBX18:TBX20:TBX22	RAGGTGTGAA	1e-06	-14.44	0	16	28.57%	837.2	6.67%
M04592_3.00:DPF1:DPF3	KCTATAGGTGA	1e-06	-14.39	0	6	10.71%	63.8	0.51%
M12384_3.00:RUNX1:RUNX2:RUNX3	AACCACA	1e-06	-14.3	0	24	42.86%	1891.3	15.07%
M01798_3.00:MNT	NNCACGTGN	1e-06	-14.22	0	24	42.86%	1900.6	15.15%
M08727_3.00:IKZF1:IKZF2:IKZF3:IKZF4	AGGAAG	1e-06	-14.15	0	28	50.00%	2539.9	20.24%
M06585_3.00:ELF1:ELF2:ELF4:ELK1:ELK3:ELK4:ERF:ERG:ETS1:ETS2:ETV1:ETV2:ETV3:ETV3L:ETV4:ETV5:ETV6:FEV:FLI1:GABPA	ACCGGAAGT	1e-06	-14.13	0	6	10.71%	66.7	0.53%
M09430_3.00:ZNF85	VTGCTGKAATCTCMN	1e-06	-14.13	0	6	10.71%	66.5	0.53%
M10676_3.00:GATA1:GATA2:GATA3:GATA4:GATA5:GATA6	NNNNNBAGATAWYATCTVHN	1e-06	-14.13	0	6	10.71%	66.2	0.53%
M08656_3.00:MYC	GCACGTGG	1e-06	-14.08	0	12	21.43%	457.8	3.65%
M12413_3.00:SMAD1:SMAD3:SMAD5:SMAD9	AKGTCCGTMCATC	1e-06	-14.04	0	4	7.14%	13.5	0.11%
M11640_3.00:ELF1:ELF2:ELF4:ELK1:ELK3:ELK4:ERF:ERG:ETS1:ETS2:ETV1:ETV2:ETV3:ETV3L:ETV4:ETV5:FEV:FLI1:GABPA	AGGAAGT	1e-06	-14.03	0	40	71.43%	4869.4	38.80%
M04895_3.00:DMRT1:DMRT2:DMRT3:DMRTA2:DMRTC2	AATTGMTACATT	1e-05	-13.81	0	6	10.71%	70.3	0.56%
M12025_3.00:MEF2A	TTKCCATTTTKGGAA	1e-05	-13.81	0	6	10.71%	70	0.56%
M09468_3.00:ZNF768	CTCAGAGAGGTTAAG	1e-05	-13.8	0.0001	4	7.14%	14.5	0.12%
M06179_3.00:TET3	NBNACGTR	1e-05	-13.79	0.0001	50	89.29%	7478.3	59.59%
M04593_3.00:DPF1:DPF3	KCTATAGGTGA	1e-05	-13.73	0.0001	6	10.71%	71.2	0.57%
M04725_3.00:OSR2	TGCTACTGTD	1e-05	-13.72	0.0001	12	21.43%	473.4	3.77%
M12176_3.00:MYB:MYBL1	NNGNCAGTTGSN	1e-05	-13.71	0.0001	18	32.14%	1123.6	8.95%
M10755_3.00:RUNX1:RUNX2:RUNX3	KYTGTGGTTT	1e-05	-13.68	0.0001	12	21.43%	475.4	3.79%
M01898_3.00:JUN:JUNB:JUND	WTRCGTCAT	1e-05	-13.64	0.0001	28	50.00%	2601.8	20.73%
M03309_3.00:BARHL1:BARHL2:BARX1:BARX2:BSX:DLX2:DLX3:EMX1:EMX2:ESX1:EVX1:EVX2:GBX1:GBX2:HESX1:HMX1:HMX2:HMX3:HOXA1:HOXA2:HOXA3:HOXA4:HOXA5:HOXB1:HOXB2:HOXB3:HOXB4:HOXB5:HOXC4:HOXC5:HOXD1:HOXD12:HOXD3:HOXD4:LBX1:LBX2:MEOX1:MEOX2:MNX1:MSX1:MSX2:NANOG:NANOGP8:NKX1-1:NKX1-2:PDX1:RAX:RAX2:TLX1:TLX3:VENTX	TTAATGATGATKAS	1e-05	-13.58	0.0001	6	10.71%	73.4	0.59%
M08659_3.00:USF1:USF2	GTCACATGAC	1e-05	-13.58	0.0001	6	10.71%	73.3	0.58%
M08995_3.00:GATA1:GATA2:GATA3:GATA4:GATA5:GATA6	CTGSNSVVBRCAGATAAGVV	1e-05	-13.58	0.0001	6	10.71%	73.9	0.59%
M12383_3.00:RUNX1:RUNX2:RUNX3	NNNHAACCACAGRSN	1e-05	-13.56	0.0001	16	28.57%	895.7	7.14%
M11657_3.00:FOXM1	TAATCAGTCTW	1e-05	-13.55	0.0001	12	21.43%	481.7	3.84%
M02976_3.00:MLXIPL	ATCACGTGAT	1e-05	-13.51	0.0001	6	10.71%	74.6	0.59%
M11661_3.00:FOXO1:FOXO3:FOXO4:FOXO6:FOXP4	TRTAAACAARTW	1e-05	-13.5	0.0001	10	17.86%	314.3	2.50%
M06235_3.00:ZFP14	ATGGAGSCHCYGGAAYG	1e-05	-13.43	0.0001	6	10.71%	75.4	0.60%
M12231_3.00:HNF4A:HNF4G:NR2E1:NR2F1:NR2F2:NR2F6:NR6A1:RXRB:RXRG	AGTCCAAA	1e-05	-13.41	0.0001	18	32.14%	1147.9	9.15%
M02748_3.00:BHLHA15	ACCATATGGT	1e-05	-13.36	0.0001	6	10.71%	77	0.61%
M03101_3.00:ZNF75A:ZNF75D	TGTGGGAAAAGC	1e-05	-13.36	0.0001	6	10.71%	76.2	0.61%
M04569_3.00:MAF:MAFA:MAFB:MAFG:MAFK	MGTCAGCANWTTT	1e-05	-13.34	0.0001	4	7.14%	16.6	0.13%
M01826_3.00:TCFL5	NBCDCGHGVN	1e-05	-13.23	0.0001	18	32.14%	1162.8	9.27%
M06404_3.00:ARNT:ARNT2	GTCACGTAC	1e-05	-13.22	0.0001	6	10.71%	78.2	0.62%
M10247_3.00:GATA1:GATA2:GATA3:GATA4:GATA5:GATA6	TGGSGSRNRSAGATAAGRV	1e-05	-13.22	0.0001	6	10.71%	78.3	0.62%
M10915_3.00:TCF12:TCF3:TCF4	GGMCASCTGCNGV	1e-05	-13.21	0.0001	18	32.14%	1163.9	9.27%
M11115_3.00:JUN:JUNB:JUND	NTGAGTCA	1e-05	-13.19	0.0001	24	42.86%	2010.5	16.02%
M00673_3.00:OSR2	NGCTACYGT	1e-05	-13.18	0.0001	12	21.43%	499.8	3.98%
M12014_3.00:IRF4:IRF8	TGAAACT	1e-05	-13.1	0.0001	30	53.57%	3019.6	24.06%
M00540_3.00:DBX1:DBX2:HLX	NNNATTR	1e-05	-13.08	0.0001	56	100.00%	9929.2	79.12%
M01111_3.00:TBX2:TBX3:TBX4:TBX5	AGGTGTGA	1e-05	-13.06	0.0001	16	28.57%	930.7	7.42%
M03007_3.00:BHLHA15	ACCATATGGT	1e-05	-13.01	0.0001	6	10.71%	81.9	0.65%
M06403_3.00:ARNT:ARNT2	GTCACGTGM	1e-05	-13.01	0.0001	6	10.71%	81.5	0.65%
M02749_3.00:BHLHE22:BHLHE23	AMCATATGKT	1e-05	-12.94	0.0001	6	10.71%	82.8	0.66%
M08013_3.00:ZFP14	GGAGGCHCTGGAABG	1e-05	-12.94	0.0001	6	10.71%	82.6	0.66%
M11618_3.00:ELF1:ELF2:ELF4:ELK1:ELK3:ELK4:ERF:ERG:ETS1:ETS2:ETV1:ETV2:ETV3:ETV3L:ETV4:ETV5:FEV:FLI1:GABPA	BVKACCGGAWGTNRGW	1e-05	-12.94	0.0001	6	10.71%	82.9	0.66%
M11167_3.00:MAF:MAFA:MAFB:MAFG:MAFK:NRL	YMKHHRMGTCAGCAMWWWM	1e-05	-12.94	0.0001	4	7.14%	18.7	0.15%
M04893_3.00:DMRT1:DMRT2:DMRT3:DMRTA2:DMRTC2	AATTGMTACATT	1e-05	-12.88	0.0001	6	10.71%	83.2	0.66%
M04950_3.00:EHF:ELF1:ELF2:ELF3:ELF4:ELF5:ELK1:ELK3:ELK4:ERF:ERG:ETS1:ETS2:ETV1:ETV2:ETV3:ETV3L:ETV4:ETV5:ETV6:ETV7:FEV:FLI1:GABPA:SPDEF	AACCCGGAAGTR	1e-05	-12.88	0.0001	6	10.71%	83.2	0.66%
M09996_3.00:SP1:SP3:SP4:SP8:SP9	GGGAAGGGGGCGGGGCCDGR	1e-05	-12.81	0.0001	6	10.71%	84.8	0.68%
M10098_3.00:SP1:SP3:SP4:SP5:SP8:SP9	GGGAAGGGGGCGGGGCCDGR	1e-05	-12.81	0.0001	6	10.71%	84.8	0.68%
M10765_3.00:STAT1	ATTTCCNGGAAATN	1e-05	-12.81	0.0001	6	10.71%	84	0.67%
M08252_3.00:MAX	GGGTCACGTGGBS	1e-05	-12.62	0.0001	6	10.71%	87.8	0.70%
M12385_3.00:RUNX1:RUNX2:RUNX3	ACCACA	1e-05	-12.6	0.0001	34	60.71%	3844.7	30.64%
M11634_3.00:ELF1:ELF2:ELF4:ELK1:ELK3:ELK4:ERF:ERG:ETS1:ETS2:ETV1:ETV2:ETV3:ETV3L:ETV4:ETV5:FEV:FLI1:GABPA	VAMAGGAAGTK	1e-05	-12.52	0.0001	24	42.86%	2086.9	16.63%
M04586_3.00:AC023509.3:ATF2:ATF7	NATGACGTCATN	1e-05	-12.5	0.0001	6	10.71%	89.6	0.71%
M12380_3.00:RUNX1:RUNX2:RUNX3	ACCACAAA	1e-05	-12.44	0.0002	20	35.71%	1500.1	11.95%
M06486_3.00:OSR2	CCAGWAGC	1e-05	-12.41	0.0002	18	32.14%	1231.6	9.81%
M10356_3.00:IRF1:IRF2	RAAANWGAAASTGAAAGTAA	1e-05	-12.4	0.0002	4	7.14%	21.9	0.17%
M02074_3.00:FOXI1:FOXI3:FOXJ2:FOXJ3:FOXP3	TTGTTTAT	1e-05	-12.3	0.0002	14	25.00%	754.6	6.01%
M00332_3.00:PBX1:PBX2:PBX3:PBX4	NBNYRTCAWN	1e-05	-12.27	0.0002	56	100.00%	10075.5	80.29%
M01229_3.00:ATF2	NKACGTCATN	1e-05	-12.23	0.0002	20	35.71%	1521.5	12.12%
M08739_3.00:ZNF85	TGMTGTAATCTC	1e-05	-12.2	0.0002	6	10.71%	94.1	0.75%
M10238_3.00:GATA1:GATA2:GATA3:GATA4:GATA5:GATA6	CTGKNNRDNVSAGATAAGR	1e-05	-12.2	0.0002	6	10.71%	94.9	0.76%
M11658_3.00:FOXM1	AYAAACAW	1e-05	-12.13	0.0002	24	42.86%	2132.5	16.99%
M00791_3.00:JUN:JUNB:JUND	NTGMGTCATM	1e-05	-12.11	0.0002	14	25.00%	767.2	6.11%
M10977_3.00:MYC	SCCACGTGSD	1e-05	-12.08	0.0002	12	21.43%	556.8	4.44%
M08523_3.00:ZNF24	GAATGAATGAA	1e-05	-12.08	0.0002	6	10.71%	96.5	0.77%
M10173_3.00:EHF:ELF1:ELF2:ELF3:ELF4:ELF5:ELK1:ELK3:ELK4:ERF:ERG:ETS1:ETS2:ETV1:ETV2:ETV3:ETV3L:ETV4:ETV5:ETV6:ETV7:FEV:FLI1:GABPA:SPDEF	GAACCCGGAAGTGS	1e-05	-12.08	0.0002	6	10.71%	96.5	0.77%
M00618_3.00:SIX1:SIX2:SIX4:SIX5	NVGTRTCAN	1e-05	-12	0.0002	40	71.43%	5215.2	41.56%
M06009_3.00:TBX6	DAGGTGTGAA	1e-05	-11.97	0.0002	16	28.57%	1013.5	8.08%
M02955_3.00:RUNX1:RUNX2:RUNX3	TTGYGGTT	1e-05	-11.93	0.0002	16	28.57%	1016.6	8.10%
M04925_3.00:ELF1:ELF2:ELF4:ELK1:ELK3:ELK4:ERF:ERG:ETS1:ETS2:ETV1:ETV2:ETV3:ETV3L:ETV4:ETV5:FEV:FLI1:GABPA	RACAGGAAGTG	1e-05	-11.92	0.0002	10	17.86%	377.5	3.01%
M04915_3.00:ELF1:ELF2:ELF4:ELK1:ELK3:ELK4:ERF:ERG:ETS1:ETS2:ETV1:ETV2:ETV3:ETV3L:ETV4:ETV5:FEV:FLI1:GABPA	DACCGGAAGTD	1e-05	-11.86	0.0003	6	10.71%	101	0.80%
M11820_3.00:NKX2-1:NKX2-2:NKX2-3:NKX2-4:NKX2-5:NKX2-6:NKX2-8	RNCWCTTGAGKG	1e-05	-11.79	0.0003	48	85.71%	7267.8	57.91%
M11571_3.00:E2F1:E2F2:E2F3:E2F4:E2F5:E2F6	TTGGCGCGAAAMVGVM	1e-05	-11.78	0.0003	4	7.14%	25.4	0.20%
M11600_3.00:ELF5:SPI1:SPIB:SPIC	AGGAAG	1e-05	-11.7	0.0003	42	75.00%	5734.5	45.70%
M08592_3.00:GATAD2B	RTNDRBAGATAAGRNWNWNDD	1e-05	-11.7	0.0003	6	10.71%	103.2	0.82%
M10630_3.00:CTCFL	GCCASCAGGGGGCGCYVNNG	1e-05	-11.64	0.0003	4	7.14%	26.3	0.21%
M10658_3.00:ELF1:ELF2:ELF4:ELK1:ELK3:ELK4:ERF:ERG:ETS1:ETS2:ETV1:ETV2:ETV3:ETV3L:ETV4:ETV5:FEV:FLI1:GABPA	RACCGGAAGT	1e-05	-11.63	0.0003	10	17.86%	390.2	3.11%
M03264_3.00:FOXC1:FOXC2:FOXD1:FOXD2:FOXD3:FOXD4:FOXD4L1:FOXD4L3:FOXD4L4:FOXD4L5:FOXD4L6:FOXE1:FOXF1:FOXF2:FOXG1:FOXI1:FOXI3:FOXK2:FOXL1:FOXL2:FOXP4:FOXS1	TGTTTAT	1e-05	-11.6	0.0003	20	35.71%	1585.2	12.63%
M10000_3.00:BCL6	TTCCTRGAAAGMR	1e-05	-11.59	0.0003	6	10.71%	105.5	0.84%
M11627_3.00:ELF1:ELF2:ELF4:ELK1:ELK3:ELK4:ERF:ERG:ETS1:ETS2:ETV1:ETV2:ETV3:ETV3L:ETV4:ETV5:FEV:FLI1:GABPA	CCGGAAGTG	1e-05	-11.59	0.0003	6	10.71%	105.5	0.84%
M11985_3.00:HSF1:HSF2:HSF4	CTGCMRG	1e-05	-11.55	0.0003	54	96.43%	9273.2	73.89%
M04638_3.00:ZBTB45	KCTATAGGTGA	1e-05	-11.54	0.0003	6	10.71%	106.4	0.85%
M08139_3.00:ZNF682	VVCCCYCSCVGGCCAAGCCCC	0.0001	-11.51	0.0003	4	7.14%	27.6	0.22%
M09264_3.00:ZNF729	SVRRGGMRGGAACCTGCNGCN	0.0001	-11.51	0.0003	4	7.14%	27.6	0.22%
M10174_3.00:ELF1:ELF2:ELF4:ELK1:ELK3:ELK4:ERF:ERG:ETS1:ETS2:ETV1:ETV2:ETV3:ETV3L:ETV4:ETV5:FEV:FLI1:GABPA	ACCGGAAGTGV	0.0001	-11.49	0.0004	6	10.71%	107.1	0.85%
M06225_3.00:JUN:JUNB:JUND	ATGACTCA	0.0001	-11.49	0.0004	14	25.00%	810.8	6.46%
M02535_3.00:RFX1:RFX2:RFX3:RFX4:RFX6	GTTGCYADGS	0.0001	-11.4	0.0004	18	32.14%	1324.3	10.55%
M10176_3.00:EHF:ELF1:ELF2:ELF3:ELF4:ELF5:ETV6:ETV7:FEV	RAACCAGGAAGTRGS	0.0001	-11.39	0.0004	6	10.71%	109.3	0.87%
M10194_3.00:EHF:ELF1:ELF2:ELF3:ELF4:ELF5:ETV6:ETV7:FEV	RAACCAGGAAGTRGS	0.0001	-11.39	0.0004	6	10.71%	109.3	0.87%
M07948_3.00:ZFP14	GGAGGCHCTGGAABG	0.0001	-11.34	0.0004	6	10.71%	111	0.88%
M04483_3.00:MAF:MAFA:MAFB:NRL	CGTCAGCANWTTT	0.0001	-11.25	0.0004	4	7.14%	29.5	0.24%
M04896_3.00:DMRT1:DMRT2:DMRT3:DMRTA2:DMRTB1:DMRTC2	AATTGWTACATT	0.0001	-11.19	0.0005	6	10.71%	114	0.91%
M08422_3.00:GATA1:GATA2:GATA3:GATA4:GATA5:GATA6	STGGNNNVNNSAGATAAG	0.0001	-11.19	0.0005	6	10.71%	113.4	0.90%
M12513_3.00:TBP:TBPL2	WATTTATA	0.0001	-11.16	0.0005	14	25.00%	834.6	6.65%
M01559_3.00:ELF1:ELF2:ELF4:ELK1:ELK3:ELK4:ERF:ERG:ETS1:ETS2:ETV1:ETV2:ETV3:ETV3L:ETV4:ETV5:FEV:FLI1:GABPA	NRBCGGAARY	0.0001	-11.16	0.0005	28	50.00%	2939	23.42%
M08477_3.00:STAT2	TTHAGTTTCRKTTTC	0.0001	-11.13	0.0005	4	7.14%	30.4	0.24%
M04497_3.00:CREB3L2:CREB3L4	GGTGACGTCAYC	0.0001	-11.1	0.0005	6	10.71%	115	0.92%
M12475_3.00:STAT1	TCCDGGAAR	0.0001	-11.05	0.0005	12	21.43%	617.1	4.92%
M04922_3.00:EHF:ELF1:ELF2:ELF3:ELF4:ELF5:ELK1:ELK3:ELK4:ERF:ERG:ETS1:ETS2:ETV1:ETV2:ETV3:ETV3L:ETV4:ETV5:ETV6:ETV7:FEV:FLI1:GABPA:SPDEF	AAMCAGGAAGTR	0.0001	-11.05	0.0005	6	10.71%	116.3	0.93%
M10986_3.00:ARNT:ARNT2	VMGRBCACGTGAYWHC	0.0001	-11.05	0.0005	6	10.71%	116.9	0.93%
M01080_3.00:CEBPA:CEBPB:CEBPE	NTTRCGCAA	0.0001	-11.02	0.0005	8	14.29%	249.4	1.99%
M01836_3.00:ATOH1	NCCATATGTY	0.0001	-11.02	0.0005	10	17.86%	419.8	3.34%
M00904_3.00:EOMES:TBX2:TBX20:TBX3:TBX4:TBX5	AGGTGTBA	0.0001	-10.99	0.0005	16	28.57%	1096.7	8.74%
M12382_3.00:RUNX1:RUNX2:RUNX3	HAACCACAG	0.0001	-10.97	0.0005	20	35.71%	1653.4	13.18%
M01071_3.00:CEBPD	NTTRCGCAA	0.0001	-10.94	0.0006	8	14.29%	252.3	2.01%
M10169_3.00:ELF1:ELF2:ELF4:ELK1:ELK3:ELK4:ERF:ERG:ETS1:ETS2:ETV1:ETV2:ETV3:ETV3L:ETV4:ETV5:FEV:FLI1:GABPA	GRCCGGAAGTG	0.0001	-10.92	0.0006	10	17.86%	424.4	3.38%
M10769_3.00:STAT4	NYTTCCWGGAAR	0.0001	-10.91	0.0006	6	10.71%	120	0.96%
M00842_3.00:ZKSCAN1	DNNYRYRNNH	0.0001	-10.9	0.0006	20	35.71%	1661.2	13.24%
M03114_3.00:SP1:SP3:SP4:SP5:SP6:SP8:SP9	GKGGGCGTGGB	0.0001	-10.87	0.0006	16	28.57%	1106.7	8.82%
M11630_3.00:ELF1:ELF2:ELF4:ELK1:ELK3:ELK4:ERF:ERG:ETS1:ETS2:ETV1:ETV2:ETV3:ETV3L:ETV4:ETV5:FEV:FLI1:GABPA	RCCGGAAGTGCA	0.0001	-10.82	0.0006	6	10.71%	121.7	0.97%
M08028_3.00:ZNF333	BGTGGAGCC	0.0001	-10.73	0.0007	24	42.86%	2310.5	18.41%
M06104_3.00:GATAD2A	RWYSKNNNNNVAGATAAGRN	0.0001	-10.73	0.0007	6	10.71%	123.2	0.98%
M00480_3.00:SIX1:SIX2:SIX4:SIX5	NSGTATCR	0.0001	-10.66	0.0007	34	60.71%	4166.5	33.20%
M04375_3.00:OLIG2:OLIG3	ACCATATGTT	0.0001	-10.64	0.0007	6	10.71%	125.1	1.00%
M04637_3.00:ZBTB45	KMTATAGGYGM	0.0001	-10.64	0.0007	6	10.71%	125.1	1.00%
M10095_3.00:BCL6	TTCCTRGAAAGCA	0.0001	-10.64	0.0007	6	10.71%	125.9	1.00%
M04928_3.00:EHF:ELF1:ELF2:ELF3:ELF4:ELF5:ELK1:ELK3:ELK4:ERF:ERG:ETS1:ETS2:ETV1:ETV2:ETV3:ETV3L:ETV4:ETV5:ETV6:ETV7:FEV:FLI1:GABPA:SPDEF	AAMCAGGAAGTR	0.0001	-10.6	0.0008	6	10.71%	126.4	1.01%
M01737_3.00:ARID3A:ARID3B:ARID3C	DTTTRATHN	0.0001	-10.6	0.0008	24	42.86%	2328.6	18.56%
M12062_3.00:BORCS8-MEF2B:MEF2A:MEF2B:MEF2C:MEF2D	RGCTATTTTTAR	0.0001	-10.57	0.0008	4	7.14%	35.8	0.29%
M04445_3.00:CREB3:CREB3L1	SRTGACGTCAYC	0.0001	-10.56	0.0008	6	10.71%	127.7	1.02%
M10719_3.00:IRF1:IRF2	GAAASYGAAASY	0.0001	-10.55	0.0008	10	17.86%	443.3	3.53%
M11886_3.00:HOXA10:HOXA11:HOXA6:HOXA9:HOXB6:HOXB8:HOXB9:HOXC10:HOXC11:HOXC12:HOXC6:HOXC8:HOXC9:HOXD10:HOXD11:HOXD12:HOXD8:HOXD9	CATAAAMT	0.0001	-10.54	0.0008	20	35.71%	1702.6	13.57%
M00833_3.00:DBP	TTACRTAAYN	0.0001	-10.5	0.0008	12	21.43%	653.4	5.21%
M08549_3.00:ZNF366	GGAWGGATGGA	0.0001	-10.48	0.0008	16	28.57%	1142.4	9.10%
M12302_3.00:ESR1:ESR2:NR1D1:NR1D2:NR1H2:NR1H3:NR1H4:NR2C1:NR2C2:NR2F1:NR2F2:NR2F6:NR4A1:NR6A1:PPARA:PPARD:PPARG:RARA:RARB:RARG:RORA:RORB:RORC:RXRA:RXRB:RXRG:THRA	VRGGTCAGGGW	0.0001	-10.48	0.0008	16	28.57%	1142	9.10%
M00831_3.00:JUN:JUNB:JUND	WKRMGTCA	0.0001	-10.43	0.0009	46	82.14%	6989.8	55.70%
M08411_3.00:ELF1:ELF2:ELF4:ELK1:ELK3:ELK4:ERF:ERG:ETS1:ETS2:ETV1:ETV2:ETV3:ETV3L:ETV4:ETV5:FEV:FLI1:GABPA	VRCCGGAAGTG	0.0001	-10.43	0.0009	6	10.71%	130.9	1.04%
M08426_3.00:GATA1:GATA2:GATA3:GATA4:GATA5:GATA6	CTGGNNNNNNSAGATAAG	0.0001	-10.43	0.0009	6	10.71%	130.8	1.04%
M11423_3.00:SP1:SP3:SP4:SP5:SP8:SP9	NGGGGGCGGGGCB	0.0001	-10.42	0.0009	12	21.43%	658.1	5.24%
M10215_3.00:FOXH1	TGTGGATTS	0.0001	-10.39	0.0009	12	21.43%	660.5	5.26%
M04405_3.00:NEUROG1	RVCATATGBY	0.0001	-10.39	0.0009	6	10.71%	131.8	1.05%
M08249_3.00:MAX	VRGTCACGTGSTS	0.0001	-10.39	0.0009	6	10.71%	131.4	1.05%
M06233_3.00:CTCF	WAGGGGGCGCTRKNGSG	0.0001	-10.37	0.0009	4	7.14%	37.3	0.30%
M00894_3.00:RFX5:RFX7	GTTGCTANGB	0.0001	-10.31	0.001	16	28.57%	1158.8	9.23%
M09212_3.00:ZNF724	MAAGTCCAAGTDNV	0.0001	-10.31	0.001	6	10.71%	134	1.07%
M08101_3.00:ZNF749	GTTGGGGTT	0.0001	-10.29	0.001	12	21.43%	667.8	5.32%
M10193_3.00:ELF1:ELF2:ELF4:ELK1:ELK3:ELK4:ERF:ERG:ETS1:ETS2:ETV1:ETV2:ETV3:ETV3L:ETV4:ETV5:FEV:FLI1:GABPA	ACCGGAAGTGR	0.0001	-10.27	0.001	6	10.71%	134.6	1.07%
M10242_3.00:GATA1:GATA2:GATA3:GATA4:GATA5:GATA6	CTGGNNRNNDSAGATAAGR	0.0001	-10.27	0.001	6	10.71%	134.5	1.07%
M10651_3.00:ELF1:ELF2:ELF4:ELK1:ELK3:ELK4:ERF:ERG:ETS1:ETS2:ETV1:ETV2:ETV3:ETV3L:ETV4:ETV5:FEV:FLI1:GABPA	AACCGGAAGT	0.0001	-10.27	0.001	10	17.86%	458.8	3.66%
M10768_3.00:STAT3	SVYTTCCNGGAARB	0.0001	-10.23	0.001	6	10.71%	135.1	1.08%
M11131_3.00:MAF:MAFA:MAFB:MAFG:MAFK:NRL	GGTCAGCAG	0.0001	-10.21	0.001	12	21.43%	673.3	5.37%
M05030_3.00:FOXI1:FOXJ3:FOXK1:FOXK2	YTGTTTACRWN	0.0001	-10.18	0.0011	10	17.86%	464	3.70%
M06181_3.00:ELF1:ELF2:ELF4:ELK1:ELK3:ELK4:ERF:ERG:ETS1:ETS2:ETV1:ETV2:ETV3:ETV3L:ETV4:ETV5:FEV:FLI1:GABPA	NNNNNACCGGWAGTN	0.0001	-10.15	0.0011	6	10.71%	137.5	1.10%
M08529_3.00:ZNF24	GAATGAATGAG	0.0001	-10.15	0.0011	6	10.71%	137.6	1.10%
M10241_3.00:GATA1:GATA2:GATA3:GATA4:GATA5:GATA6	RSAGATAAGATAA	0.0001	-10.15	0.0011	6	10.71%	137.6	1.10%
M10636_3.00:BCL6	TTTCCTGGAAAGNNN	0.0001	-10.15	0.0011	6	10.71%	137.7	1.10%
M11082_3.00:NFE2:NFE2L1:NFE2L2:NFE2L3	RTGACTCAGCA	0.0001	-10.15	0.0011	6	10.71%	137.4	1.10%
M12532_3.00:TEAD3:TEAD4	GVTATTTTT	0.0001	-10.14	0.0011	14	25.00%	915.3	7.29%
M11616_3.00:ELF1:ELF2:ELF4:ELK1:ELK3:ELK4:ERF:ERG:ETS1:ETS2:ETV1:ETV2:ETV3:ETV3L:ETV4:ETV5:FEV:FLI1:GABPA	ACCGGAAGYV	0.0001	-10.13	0.0011	14	25.00%	916.4	7.30%
M01894_3.00:CREB3L1:CREB3L2:CREB3L4	ACACGTGGC	0.0001	-10.11	0.0011	6	10.71%	138.4	1.10%
M10960_3.00:MAX	CCRGCCACGTGC	0.0001	-10.11	0.0011	6	10.71%	138.8	1.11%
M11643_3.00:ELF1:ELF2:ELF4:ELK1:ELK3:ELK4:ERF:ERG:ETS1:ETS2:ETV1:ETV2:ETV3:ETV3L:ETV4:ETV5:FEV:FLI1:GABPA	CMGGAAGC	0.0001	-10.1	0.0011	16	28.57%	1178.8	9.39%
M09924_3.00:ATF3:JDP2	VTCACGTSACC	0.0001	-10.07	0.0011	6	10.71%	139.3	1.11%
M11112_3.00:FOS:FOSB:FOSL1:FOSL2	HTGAGTCA	0.0001	-10.06	0.0011	24	42.86%	2404.4	19.16%
M03187_3.00:ELF1:ELF2:ELF4:ELK1:ELK3:ELK4:ERF:ERG:ETS1:ETS2:ETV1:ETV2:ETV3:ETV3L:ETV4:ETV5:FEV:FLI1:GABPA	ACCGGAAGTR	0.0001	-10.03	0.0012	6	10.71%	140.9	1.12%
M05699_3.00:POU3F4	WTATGCGCATAH	0.0001	-10.03	0.0012	6	10.71%	140.8	1.12%
M08016_3.00:RBAK	GGGAGAGRARVRGSC	0.0001	-10.02	0.0012	12	21.43%	686	5.47%
M11669_3.00:FOXA1:FOXA2:FOXA3:FOXB1	RCAAACAA	0.0001	-10.02	0.0012	24	42.86%	2409.6	19.20%
M01572_3.00:EHF:ELF1:ELF2:ELF3:ELF4:ELF5:ETV6:ETV7:SPI1:SPIC	ANVMGGAAGT	0.0001	-10.01	0.0012	28	50.00%	3116.9	24.84%
M06121_3.00:ZNF516	MAWTGG	0.0001	-10	0.0012	38	67.86%	5140.3	40.96%
M11927_3.00:ALX1:ALX3:ALX4:ARX:BARHL1:BARHL2:BARX1:BARX2:BSX:DLX1:DLX2:DLX3:DLX4:DLX5:DLX6:DRGX:EMX2:EN1:EN2:GBX1:GBX2:GSX1:GSX2:HOXA1:HOXA2:HOXA3:HOXB1:HOXB2:HOXB3:HOXD1:HOXD3:ISX:LHX1:LHX5:MEOX1:MEOX2:MNX1:MSX1:MSX2:NANOG:NANOGP8:NKX1-1:NKX1-2:PDX1:PHOX2A:PHOX2B:PROP1:PRRX1:PRRX2:SHOX:SHOX2:UNCX:VAX1:VAX2:VSX1:VSX2	GCATTATTTACATG	0.0001	-9.999	0.0012	4	7.14%	41.3	0.33%
M06180_3.00:ELF1:ELF2:ELF4:ELK1:ELK3:ELK4:ERF:ERG:ETS1:ETS2:ETV1:ETV2:ETV3:ETV3L:ETV4:ETV5:FEV:FLI1:GABPA	RCCGGAAG	0.0001	-9.998	0.0012	22	39.29%	2082.7	16.60%
M04972_3.00:ELF1:ELF2:ELF4:ELK1:ELK3:ELK4:ERF:ERG:ETS1:ETS2:ETV1:ETV2:ETV3:ETV3L:ETV4:ETV5:FEV:FLI1:GABPA	NACCGGAAGTR	0.0001	-9.919	0.0013	6	10.71%	143.8	1.15%
M04790_3.00:ZBTB18	DDTCCAGATGTKB	0.0001	-9.917	0.0013	8	14.29%	292.3	2.33%
M10406_3.00:NR1I2:NR1I3:VDR	WRRGGTCAANNAAGTTCAB	0.0001	-9.911	0.0013	4	7.14%	42.4	0.34%
M10439_3.00:NR1I2:VDR	WRRGGTCAANNAAGTTCAB	0.0001	-9.911	0.0013	4	7.14%	42.4	0.34%
M09417_3.00:ZNF264	RGTTAGYGCCCT	0.0001	-9.882	0.0013	6	10.71%	145	1.16%
M04490_3.00:ATF3:JDP2	SRTGACGTCAYS	0.0001	-9.845	0.0014	6	10.71%	145.8	1.16%
M04936_3.00:ELF1:ELF2:ELF4:ELK1:ELK3:ELK4:ERF:ERG:ETS1:ETS2:ETV1:ETV2:ETV3:ETV3L:ETV4:ETV5:FEV:FLI1:GABPA	NRCCGGAAGTR	0.0001	-9.845	0.0014	6	10.71%	145.1	1.16%
M11280_3.00:CTCF	CABHWGRTGGCAG	0.0001	-9.808	0.0014	6	10.71%	146.9	1.17%
M12551_3.00:POU2AF1	ATATGCAAATC	0.0001	-9.808	0.0014	6	10.71%	146.2	1.16%
M01828_3.00:MSC:TCF21	MCATATGTT	0.0001	-9.795	0.0014	10	17.86%	485.3	3.87%
M11091_3.00:JUN:JUNB:JUND	NTGAGTCA	0.0001	-9.794	0.0014	24	42.86%	2442.6	19.46%
M05080_3.00:GATA1:GATA2:GATA3:GATA4:GATA5:GATA6	NWGATAASRN	0.0001	-9.792	0.0014	16	28.57%	1209.8	9.64%
M04373_3.00:ATOH1	GMCATATGKT	0.0001	-9.771	0.0014	6	10.71%	147.8	1.18%
M08425_3.00:GATA1:GATA2:GATA3:GATA4:GATA5:GATA6	TGGNNVSNRSAGATAAGR	0.0001	-9.771	0.0014	6	10.71%	147.3	1.17%
M10167_3.00:EBF1	ARGTCCCCAGGGACH	0.0001	-9.771	0.0014	6	10.71%	147.6	1.18%
M08550_3.00:ZNF48	CAGAGACA	0.0001	-9.746	0.0015	28	50.00%	3159.3	25.18%
M11256_3.00:MZF1	RGTGGGGA	0.0001	-9.739	0.0015	34	60.71%	4334.1	34.54%
M05999_3.00:TBX15:TBX18:TBX20:TBX22	RAGGTGTGAA	0.0001	-9.732	0.0015	16	28.57%	1216	9.69%
M04475_3.00:BATF:BATF3	GATGACGTCAYC	0.0001	-9.699	0.0015	6	10.71%	149.9	1.19%
M12511_3.00:TBP:TBPL2	SSBBSSYTTTTATAS	0.0001	-9.699	0.0015	6	10.71%	149.3	1.19%
M00837_3.00:ZNF263	GGGAGSAC	0.0001	-9.695	0.0015	22	39.29%	2123.2	16.92%
M11846_3.00:CDX1:CDX2:CDX4	NYATTTATGRM	0.0001	-9.693	0.0015	12	21.43%	710.4	5.66%
M01924_3.00:JUN:JUNB:JUND	ATGACKCAH	0.0001	-9.658	0.0016	24	42.86%	2462.5	19.62%
M10321_3.00:SIX1:SIX2:SIX4:SIX5	GGTSTCAGGTTTCW	0.0001	-9.628	0.0016	6	10.71%	151.8	1.21%
M06133_3.00:ZBTB8A	NNNNNHDNNGGGCGYHN	0.0001	-9.625	0.0016	16	28.57%	1226.7	9.77%
M10981_3.00:TCF12:TCF3:TCF4	GCCAGCTG	0.0001	-9.613	0.0016	12	21.43%	716.1	5.71%
M08421_3.00:GATA1:GATA2:GATA3:GATA4:GATA5:GATA6	RCAGATAAGRV	0.0001	-9.61	0.0016	10	17.86%	496.1	3.95%
M06041_3.00:FOSL2	NNNRWKGCGTCATCNNNNNN	0.0001	-9.592	0.0016	6	10.71%	152.5	1.22%
M08654_3.00:TWIST1:TWIST2	CCAGATGT	0.0001	-9.567	0.0017	14	25.00%	965.3	7.69%
M02992_3.00:BHLHE40:BHLHE41	VKCACGTGMC	0.0001	-9.557	0.0017	6	10.71%	153.8	1.23%
M09407_3.00:ZNF263	RRSRGGGAGCACBGHSVVGSR	0.0001	-9.557	0.0017	6	10.71%	153.7	1.22%
M00336_3.00:ALX1:ALX3:ALX4:ARX:BARX1:BARX2:BSX:DLX1:DLX2:DLX3:DLX6:DRGX:EMX1:EMX2:EN1:EN2:ESX1:EVX1:EVX2:GBX1:GBX2:GSX1:GSX2:HESX1:HOXA2:HOXA3:HOXB2:HOXB3:HOXD3:ISX:LBX1:LBX2:LHX1:LHX2:LHX3:LHX4:LHX5:LHX6:LHX8:LHX9:LMX1A:LMX1B:MEOX1:MIXL1:MNX1:MSX1:MSX2:NKX1-1:NKX1-2:NOBOX:NOTO:OTP:PDX1:PHOX2A:PHOX2B:PROP1:PRRX1:PRRX2:RAX:RAX2:SEBOX:SHOX:SHOX2:UNCX:VAX1:VAX2:VSX1:VSX2:ZFHX2:ZFHX3	NNNNNNNWAT	0.0001	-9.545	0.0017	56	100.00%	10578.4	84.30%
M08729_3.00:ZBTB11	CCGGAAGTG	0.0001	-9.522	0.0017	6	10.71%	154.3	1.23%
M03863_3.00:ATF1:CREB1:CREM	RTGACGTCAY	0.0001	-9.488	0.0018	6	10.71%	155.3	1.24%
M03864_3.00:ATF1:CREB1:CREM	RTGACGTCAY	0.0001	-9.488	0.0018	6	10.71%	155.3	1.24%
M08472_3.00:STAT1	TTTCCYGGAAA	0.0001	-9.454	0.0018	6	10.71%	156.7	1.25%
M08415_3.00:ELF1:ELF2:ELF4:ELK1:ELK3:ELK4:ERF:ERG:ETS1:ETS2:ETV1:ETV2:ETV3:ETV3L:ETV4:ETV5:FEV:FLI1:GABPA	CCGGAAGTGG	0.0001	-9.419	0.0019	6	10.71%	157.8	1.26%
M09843_3.00:MXI1	SCSSCNSCCACGTGS	0.0001	-9.386	0.002	6	10.71%	158.5	1.26%
M09877_3.00:MXD1:MXI1	SCSSCNSCCACGTGS	0.0001	-9.386	0.002	6	10.71%	158.5	1.26%
M01997_3.00:FBXL19:KDM2A:KDM2B	NNNNCGNNNN	0.0001	-9.379	0.002	18	32.14%	1540.3	12.27%
M06113_3.00:ZBED4	AHYNGRACCRNN	0.0001	-9.379	0.002	18	32.14%	1540.4	12.27%
M08751_3.00:ZNF341	GAACAGCC	0.0001	-9.365	0.002	12	21.43%	735.3	5.86%
M09439_3.00:ZNF45	AGGAATATA	0.0001	-9.352	0.002	12	21.43%	736.4	5.87%
M01584_3.00:CUX1:CUX2	TTATCGRTD	0.0001	-9.338	0.002	16	28.57%	1256.9	10.02%
M10913_3.00:MITF:TFE3	NRGTCABSTGRC	0.0001	-9.303	0.0021	10	17.86%	515.8	4.11%
M08761_3.00:ZSCAN21	AGTGCTT	0.0001	-9.3	0.0021	26	46.43%	2868.9	22.86%
M10263_3.00:CDX1:CDX2:CDX4	MCATAAAT	0.0001	-9.299	0.0021	20	35.71%	1856.5	14.79%
M10309_3.00:CDX1:CDX2:CDX4	MCATAAAT	0.0001	-9.299	0.0021	20	35.71%	1856.5	14.79%
M01072_3.00:CEBPD	TTRCGCAA	0.0001	-9.269	0.0021	8	14.29%	321.8	2.56%
M00846_3.00:ZBTB1	NDTGCGGGDN	0.0001	-9.261	0.0022	18	32.14%	1554	12.38%
M04601_3.00:PRDM1	RAGTGAAAGTGR	0.0001	-9.252	0.0022	6	10.71%	163	1.30%
M08416_3.00:ELF1:ELF2:ELF4:ELK1:ELK3:ELK4:ERF:ERG:ETS1:ETS2:ETV1:ETV2:ETV3:ETV3L:ETV4:ETV5:FEV:FLI1:GABPA	GRCCGGAAGTG	0.0001	-9.252	0.0022	6	10.71%	162.2	1.29%
M10583_3.00:USF1:USF2	SGTCACGTGR	0.0001	-9.252	0.0022	6	10.71%	162.2	1.29%
M11378_3.00:E4F1	RTGACGTAAC	0.0001	-9.22	0.0022	6	10.71%	163.4	1.30%
M04572_3.00:MAF:MAFA:MAFB:MAFG:MAFK	AGTCAGCANWTTT	0.001	-9.203	0.0022	4	7.14%	51.8	0.41%
M00200_3.00:ZBTB14	RKGCGCGYN	0.001	-9.203	0.0022	18	32.14%	1561.2	12.44%
M04404_3.00:BHLHE22:BHLHE23	AMCATATGKT	0.001	-9.187	0.0023	6	10.71%	164.6	1.31%
M04766_3.00:ZNF449	GGTTGGGCKT	0.001	-9.177	0.0023	10	17.86%	523.9	4.17%
M11903_3.00:HOXA10:HOXA11:HOXA6:HOXA9:HOXB6:HOXB8:HOXB9:HOXC10:HOXC11:HOXC12:HOXC5:HOXC6:HOXC8:HOXC9:HOXD10:HOXD11:HOXD12:HOXD8:HOXD9	CATAAAA	0.001	-9.167	0.0023	14	25.00%	1002.1	7.99%
M03266_3.00:FOXI1:FOXJ3:FOXK1:FOXK2	TGTTTAC	0.001	-9.157	0.0023	24	42.86%	2538	20.22%
M03022_3.00:BHLHE40:BHLHE41	VKCACGTGMC	0.001	-9.155	0.0023	6	10.71%	165.1	1.32%
M04280_3.00:USF2	KGTCACGTGGG	0.001	-9.091	0.0025	6	10.71%	167.7	1.34%
M11680_3.00:FOXA1:FOXA2:FOXA3:FOXB1:FOXS1	AACAAACA	0.001	-9.069	0.0025	16	28.57%	1285.4	10.24%
M10694_3.00:ALX1:ALX3:ALX4:ARX:BARHL1:BARHL2:BARX1:BARX2:BSX:DLX1:DLX2:DLX3:DLX4:DLX5:DLX6:DRGX:EMX1:EMX2:EN1:EN2:ESX1:EVX1:EVX2:GBX1:GBX2:GSX1:GSX2:HMX1:HMX2:HMX3:HOXA1:HOXA2:HOXA3:HOXA4:HOXA5:HOXA6:HOXA7:HOXB1:HOXB2:HOXB3:HOXB4:HOXB5:HOXB6:HOXB7:HOXB8:HOXC4:HOXC5:HOXC6:HOXD1:HOXD3:HOXD4:HOXD8:ISX:LHX3:LHX4:MEOX1:MEOX2:MIXL1:MNX1:MSX1:MSX2:NANOG:NANOGP8:NKX1-1:NKX1-2:NOBOX:NOTO:OTP:PDX1:PHOX2A:P…	YCATYAATCA	0.001	-9.028	0.0026	6	10.71%	169.4	1.35%
M01742_3.00:ARID3A:ARID3B:ARID3C	WTTTRATHN	0.001	-9.01	0.0027	24	42.86%	2561.7	20.41%
M00314_3.00:FOXC1:FOXC2:FOXD1:FOXD2:FOXD3:FOXD4:FOXD4L1:FOXD4L3:FOXD4L4:FOXD4L5:FOXD4L6:FOXE1:FOXF1:FOXF2:FOXG1:FOXI1:FOXI3:FOXK2:FOXL1:FOXL2:FOXP4:FOXS1	TTGTTTAT	0.001	-8.999	0.0027	14	25.00%	1018.7	8.12%
M04318_3.00:MAX	RNCACGTGYN	0.001	-8.99	0.0027	12	21.43%	765.1	6.10%
M06119_3.00:ZNF532	DKGGCACMH	0.001	-8.965	0.0028	38	67.86%	5352.6	42.65%
M04350_3.00:USF1:USF2	BGTCACGTGGD	0.001	-8.934	0.0028	6	10.71%	172	1.37%
M04505_3.00:ATF2:CREB5	NATGACGTCATN	0.001	-8.934	0.0028	6	10.71%	172.6	1.38%
M09863_3.00:MITF:TFE3:TFEB:TFEC	GGTCACGTGA	0.001	-8.904	0.0029	6	10.71%	173.6	1.38%
M02014_3.00:DMRT1:DMRT2:DMRT3:DMRTA2:DMRTC2	TTGATACATT	0.001	-8.904	0.0029	10	17.86%	541.9	4.32%
M10677_3.00:GATA1:GATA2:GATA3:GATA4:GATA5:GATA6	NAGATWNBNATCTNN	0.001	-8.873	0.003	6	10.71%	174.6	1.39%
M08474_3.00:STAT3	CATTTCCYGGAAD	0.001	-8.843	0.0031	6	10.71%	175.7	1.40%
M10548_3.00:EOMES:TBR1:TBX21	GDGDAGGTGTGAR	0.001	-8.833	0.0031	12	21.43%	778.1	6.20%
M04399_3.00:BHLHA15	RACAGCTGBT	0.001	-8.825	0.0031	14	25.00%	1035.9	8.25%
M03442_3.00:CRX:DMBX1:DPRX:GSC:GSC2:OTX1:OTX2:PITX1:PITX2:PITX3:TPRX1	VGGATAATCCN	0.001	-8.813	0.0031	6	10.71%	176.6	1.41%
M10600_3.00:OLIG2:OLIG3	AACAKATGGY	0.001	-8.8	0.0032	16	28.57%	1315.6	10.48%
M04765_3.00:ZNF449	GGTTGGGCGY	0.001	-8.798	0.0032	4	7.14%	57.2	0.46%
M05075_3.00:GATA1:GATA2:GATA3:GATA4:GATA5:GATA6	CWGATAASRV	0.001	-8.742	0.0033	10	17.86%	552.3	4.40%
M10204_3.00:ELF1:ELF2:ELF4:ELK1:ELK3:ELK4:ERF:ERG:ETS1:ETS2:ETV1:ETV2:ETV3:ETV3L:ETV4:ETV5:ETV6:FEV:FLI1:GABPA	RRACMGGAAGYGRV	0.001	-8.742	0.0033	10	17.86%	552.3	4.40%
M08254_3.00:MAX	GRYCACGTGG	0.001	-8.724	0.0034	6	10.71%	179.1	1.43%
M11744_3.00:GTF2I	VAGGAAGTGA	0.001	-8.718	0.0034	22	39.29%	2264.5	18.05%
M04402_3.00:BHLHA15	ACCATATGGT	0.001	-8.694	0.0035	6	10.71%	180.8	1.44%
M12174_3.00:MYB:MYBL1	NGBCAGTTGGG	0.001	-8.691	0.0035	12	21.43%	790.9	6.30%
M03767_3.00:EOMES:TBR1:TBX21:TBX5	AAGGTGTGAAAWN	0.001	-8.672	0.0035	4	7.14%	59.9	0.48%
M10545_3.00:STAT1	TTTSTTTCAGTTTCWKTTTCYY	0.001	-8.672	0.0035	4	7.14%	60	0.48%
M10440_3.00:NR2C1:NR2C2:NR2F1:NR2F2:NR2F6:NR4A1:NR4A2:NR4A3:PPARD:PPARG:RARA:RARB:RARG:RORA:RORB:RORC:RXRA:RXRB:RXRG	RAAADGKCA	0.001	-8.642	0.0036	28	50.00%	3351.1	26.70%
M06582_3.00:EHF:ELF1:ELF2:ELF3:ELF4:ELF5:ELK1:ELK3:ELK4:ERF:ERG:ETS1:ETS2:ETV1:ETV2:ETV3:ETV3L:ETV4:ETV5:ETV6:ETV7:FEV:FLI1:GABPA:SPDEF	AACAGGAAGT	0.001	-8.612	0.0037	10	17.86%	561.5	4.47%
M08837_3.00:ELF1:ELF2:ELF4:ELK1:ELK3:ELK4:ERF:ERG:ETS1:ETS2:ETV1:ETV2:ETV3:ETV3L:ETV4:ETV5:FEV:FLI1:GABPA	ACAGGAAGT	0.001	-8.612	0.0037	10	17.86%	561.6	4.47%
M04887_3.00:DMRT1:DMRT2:DMRT3:DMRTA2:DMRTB1:DMRTC2	AWTYGHTACATT	0.001	-8.607	0.0037	6	10.71%	183.4	1.46%
M06221_3.00:FOSL2	ATGACGTCAT	0.001	-8.607	0.0037	6	10.71%	183.4	1.46%
M08881_3.00:MEIS1:MEIS2:MEIS3:PKNOX1:PKNOX2:TGIF1:TGIF2	CATCAATCA	0.001	-8.607	0.0037	6	10.71%	183.2	1.46%
M11222_3.00:ZNF263	GRGGGAGGAGGR	0.001	-8.587	0.0038	12	21.43%	799.1	6.37%
M09126_3.00:ZNF606	GAGGAAACCGCTCCYKC	0.001	-8.557	0.0039	2	3.57%	3.5	0.03%
M00379_3.00:NKX2-1:NKX2-2:NKX2-3:NKX2-4:NKX2-5:NKX2-6:NKX2-8	NNNAYRW	0.001	-8.556	0.0039	56	100.00%	10767.3	85.80%
M10357_3.00:IRF3	GAAAGGGAAAGRGAAAGDGA	0.001	-8.551	0.0039	4	7.14%	61.2	0.49%
M10364_3.00:IRF3	GAAAGGGAAAGRGAAAGDGA	0.001	-8.551	0.0039	4	7.14%	61.2	0.49%
M04888_3.00:DMRT1:DMRT2:DMRT3:DMRTA2:DMRTB1:DMRTC2	AATYGCTACATN	0.001	-8.55	0.0039	6	10.71%	185.2	1.48%
M11622_3.00:ELF1:ELF2:ELF4:ELK1:ELK3:ELK4:ERF:ERG:ETS1:ETS2:ETV1:ETV2:ETV3:ETV3L:ETV4:ETV5:FEV:FLI1:GABPA	RCAGGAAGTGVKTGS	0.001	-8.521	0.004	6	10.71%	186.9	1.49%
M00363_3.00:ALX1:ALX3:ALX4:ARX:DRGX:EMX1:EMX2:EN1:EN2:ESX1:EVX1:EVX2:GBX1:GBX2:HESX1:HOXA2:HOXB2:ISX:LBX1:LBX2:LHX2:LHX3:LHX4:LHX9:LMX1A:LMX1B:MEOX2:MIXL1:MNX1:MSX1:MSX2:NKX1-1:NKX1-2:OTP:PHOX2A:PHOX2B:PROP1:PRRX1:PRRX2:RAX:RAX2:SEBOX:SHOX:SHOX2:UNCX:VSX1:VSX2	YATATATAN	0.001	-8.508	0.004	14	25.00%	1067.5	8.51%
M05365_3.00:ALX1:ALX3:ALX4:ARX:BARHL1:BARHL2:BARX1:BARX2:BSX:DLX1:DLX2:DLX3:DLX4:DLX5:DLX6:DRGX:EMX1:EMX2:EN1:EN2:ESX1:EVX1:EVX2:GBX1:GBX2:GSX1:GSX2:HMX1:HMX2:HMX3:HOXA1:HOXA2:HOXA3:HOXA4:HOXA5:HOXA6:HOXA7:HOXB1:HOXB2:HOXB3:HOXB4:HOXB5:HOXB6:HOXB7:HOXB8:HOXC4:HOXC5:HOXC6:HOXD1:HOXD3:HOXD4:HOXD8:ISX:LHX3:LHX4:MEOX1:MEOX2:MIXL1:MNX1:MSX1:MSX2:NANOG:NANOGP8:NKX1-1:NKX1-2:NOBOX:NOTO:OTP:PDX1:PHOX2A:P…	CTAATTAC	0.001	-8.488	0.0041	16	28.57%	1351.7	10.77%
M04281_3.00:USF2	KGTCACATGGY	0.001	-8.465	0.0042	6	10.71%	188.6	1.50%
M09003_3.00:NKX2-1:NKX2-2:NKX2-3:NKX2-4:NKX2-5:NKX2-6:NKX2-8	TATCGATT	0.001	-8.465	0.0042	6	10.71%	188.2	1.50%
M06849_3.00:T:TBX19	AWGTGCRA	0.001	-8.442	0.0043	18	32.14%	1657.1	13.20%
M04242_3.00:JUN:JUNB:JUND	ATGACGTCAY	0.001	-8.437	0.0043	6	10.71%	189.8	1.51%
M04374_3.00:ARNT:ARNT2	GTCACGTGMN	0.001	-8.437	0.0043	6	10.71%	189.4	1.51%
M04265_3.00:HES2	SNCACRTNMN	0.001	-8.426	0.0043	44	78.57%	6904.4	55.02%
M01090_3.00:FOXR1	TGTTTGHN	0.001	-8.425	0.0043	32	57.14%	4180.1	33.31%
M01834_3.00:USF2	RTCACGTGKK	0.001	-8.41	0.0043	6	10.71%	190.6	1.52%
M12456_3.00:SOX1:SOX10:SOX11:SOX12:SOX13:SOX14:SOX15:SOX17:SOX18:SOX2:SOX21:SOX3:SOX30:SOX4:SOX5:SOX6:SOX7:SOX8:SOX9:SRY	AAACAA	0.001	-8.375	0.0045	32	57.14%	4190.8	33.40%
M11073_3.00:ATF1:CREB1:CREM	NNNTKACGTCASBNN	0.001	-8.361	0.0045	10	17.86%	579.9	4.62%
M10678_3.00:GATA1:GATA2:GATA3:GATA4:GATA5:GATA6	AGATAASR	0.001	-8.344	0.0046	16	28.57%	1368.5	10.91%
M04267_3.00:SREBF1:SREBF2	RTCACGTGAY	0.001	-8.328	0.0047	6	10.71%	193.7	1.54%
M04371_3.00:ATOH1	GMCATATGBT	0.001	-8.328	0.0047	6	10.71%	193.6	1.54%
M11623_3.00:EHF:ELF1:ELF2:ELF3:ELF4:ELF5:ETV6:ETV7:FEV	GCAGGAAV	0.001	-8.321	0.0047	32	57.14%	4201.3	33.48%
M03772_3.00:TBX15:TBX18:TBX20:TBX4:TBX5	WAGGTGTGAAG	0.001	-8.319	0.0047	4	7.14%	65.6	0.52%
M11665_3.00:FOXA1:FOXA2:FOXA3:FOXB1	WAAGTAAAC	0.001	-8.265	0.0049	10	17.86%	586.2	4.67%
M12378_3.00:RUNX1:RUNX2:RUNX3	HAACCACANH	0.001	-8.216	0.0052	20	35.71%	2007.4	16.00%
M11804_3.00:NKX2-1:NKX2-2:NKX2-3:NKX2-4:NKX2-5:NKX2-6:NKX2-8	AASYACTTAA	0.001	-8.209	0.0052	4	7.14%	67.9	0.54%
M09891_3.00:MYCN	CCACGTGS	0.001	-8.183	0.0053	12	21.43%	835.1	6.65%
M01885_3.00:HLF:TEF	TBACGTAAYN	0.001	-8.096	0.0058	12	21.43%	843.8	6.72%
M06604_3.00:TRPS1	WGATAAG	0.001	-8.079	0.0059	10	17.86%	600.4	4.78%
M04236_3.00:ATF3:JDP2	ATGACGTCAC	0.001	-8.064	0.0059	6	10.71%	203.3	1.62%
M09977_3.00:PRDM1	GAAAGTGAAAGTGR	0.001	-8.05	0.006	4	7.14%	70.6	0.56%
M10118_3.00:PRDM1	GAAAGTGAAAGTGR	0.001	-8.05	0.006	4	7.14%	70.6	0.56%
M12483_3.00:STAT5A	TTCYTAGAAATNN	0.001	-8.038	0.0061	6	10.71%	204.7	1.63%
M11621_3.00:ELF1:ELF2:ELF4:ELK1:ELK3:ELK4:ERF:ERG:ETS1:ETS2:ETV1:ETV2:ETV3:ETV3L:ETV4:ETV5:FEV:FLI1:GABPA	GGAGTTG	0.001	-8.027	0.0061	36	64.29%	5111.9	40.73%
M03958_3.00:GATA1:GATA2:GATA3:GATA4:GATA5:GATA6	WGATAAGR	0.001	-8.014	0.0062	10	17.86%	605.3	4.82%
M03965_3.00:TRPS1	GCGATAAS	0.001	-8.014	0.0062	10	17.86%	605.3	4.82%
M12361_3.00:RELA	GGGRATTTC	0.001	-8.014	0.0062	10	17.86%	605.9	4.83%
M10172_3.00:EHF:ELF1:ELF2:ELF3:ELF4:ELF5:ELK1:ELK3:ELK4:ERF:ERG:ETS1:ETS2:ETV1:ETV2:ETV3:ETV3L:ETV4:ETV5:ETV6:ETV7:FEV:FLI1:GABPA:SPDEF	RAVCCGGAAGTGR	0.001	-8.013	0.0062	6	10.71%	205.7	1.64%
M00832_3.00:CEBPA:CEBPB:CEBPE	RTKDYGCAAY	0.001	-7.995	0.0062	20	35.71%	2040.2	16.26%
M01076_3.00:CEBPA:CEBPB:CEBPE	TTDCGCAA	0.001	-7.984	0.0063	8	14.29%	389.6	3.10%
M09942_3.00:FOS:FOSB:FOSL1:FOSL2	GGRTGAGTCAYC	0.001	-7.962	0.0064	6	10.71%	207.6	1.65%
M06364_3.00:NEUROG2	GTGACATATGG	0.001	-7.912	0.0067	6	10.71%	209.5	1.67%
M11871_3.00:PBX1:PBX2:PBX3:PBX4	ATCAATCAA	0.001	-7.911	0.0067	10	17.86%	613.1	4.89%
M11482_3.00:ZIC1:ZIC2:ZIC3:ZIC4:ZIC5	CCCAGCGGG	0.001	-7.905	0.0068	12	21.43%	861.6	6.87%
M06010_3.00:TBX6	DAGGTGTKAA	0.001	-7.889	0.0068	16	28.57%	1424.8	11.35%
M04996_3.00:EHF:ELF1:ELF2:ELF4:ELK1:ELK3:ELK4:ERF:ERG:ETS1:ETS2:ETV1:ETV2:ETV3:ETV3L:ETV4:ETV5:FEV:FLI1:GABPA	RACCGGAAGTG	0.001	-7.888	0.0068	6	10.71%	210.8	1.68%
M10536_3.00:STAT4	YTTCCRRGAAA	0.001	-7.864	0.007	12	21.43%	865.1	6.89%
M08296_3.00:JUN:JUNB:JUND	GRTGAGTCAYC	0.001	-7.863	0.007	6	10.71%	211.2	1.68%
M04726_3.00:OSR2	TGCTACTGTD	0.001	-7.85	0.0071	8	14.29%	397.2	3.16%
M11768_3.00:HOXA10:HOXA11:HOXA5:HOXA6:HOXA7:HOXA9:HOXB5:HOXB6:HOXB8:HOXB9:HOXC10:HOXC11:HOXC5:HOXC6:HOXC8:HOXC9:HOXD10:HOXD11:HOXD8:HOXD9	ATTAATDACATC	0.001	-7.848	0.0071	4	7.14%	74.8	0.60%
M08255_3.00:MAX	GRRNCACGTGG	0.001	-7.838	0.0071	6	10.71%	212.9	1.70%
M11796_3.00:CRX:DMBX1:DPRX:GSC:GSC2:OTX1:OTX2:PITX1:PITX2:PITX3:TPRX1	GGATTASTT	0.001	-7.822	0.0072	10	17.86%	620.2	4.94%
M10599_3.00:MYCN	VRCCACGTGG	0.001	-7.814	0.0073	6	10.71%	213.8	1.70%
M10988_3.00:ARNT:ARNT2	SSCACGYR	0.001	-7.811	0.0073	16	28.57%	1434.5	11.43%
M00187_3.00:OSR1:OSR2	AACRGTAGCH	0.001	-7.802	0.0073	12	21.43%	871.3	6.94%
M04575_3.00:MAF:MAFA:MAFB:MAFG:MAFK	YACGTCAGCA	0.001	-7.797	0.0073	10	17.86%	623	4.96%
M08256_3.00:BHLHE40:BHLHE41	GCACGTGACB	0.001	-7.79	0.0074	6	10.71%	214.1	1.71%
M08863_3.00:GATA1:GATA2:GATA3:GATA4:GATA5:GATA6	AGATAAGA	0.001	-7.747	0.0077	10	17.86%	626.1	4.99%
M12678_3.00:TRPS1	AGATAAGA	0.001	-7.747	0.0077	10	17.86%	626.1	4.99%
M04264_3.00:HES2	GGCACGTGYC	0.001	-7.742	0.0077	6	10.71%	216.1	1.72%
M04486_3.00:JUN:JUNB:JUND	SGTGACGTCATS	0.001	-7.718	0.0078	6	10.71%	217.7	1.74%
M09929_3.00:JUN:JUNB:JUND	DRTGACTCATC	0.001	-7.718	0.0078	6	10.71%	217.1	1.73%
M04270_3.00:TFAP4	AHCATATGDT	0.001	-7.698	0.008	10	17.86%	630.6	5.02%
M06333_3.00:TFAP4	ATCAGCTGKTY	0.001	-7.694	0.008	6	10.71%	218.5	1.74%
M08475_3.00:STAT3	CATTTCCYGGAANNB	0.001	-7.694	0.008	6	10.71%	218.6	1.74%
M08476_3.00:STAT3	CATTTCCYGGAANNB	0.001	-7.694	0.008	6	10.71%	218.6	1.74%
M09533_3.00:KLF14:KLF16	VRGKGGGCGGGGCC	0.001	-7.694	0.008	6	10.71%	218.3	1.74%
M09904_3.00:FOSL2	KRATGAGTCATY	0.001	-7.694	0.008	6	10.71%	218.9	1.74%
M01293_3.00:DMRT1:DMRT2:DMRT3:DMRTA2:DMRTB1:DMRTC2	WNGHWACAWW	0.001	-7.671	0.0081	16	28.57%	1452.1	11.57%
M05079_3.00:GATA1:GATA2:GATA3:GATA4:GATA5:GATA6	SHGATAACRN	0.001	-7.649	0.0083	10	17.86%	634.5	5.06%
M04351_3.00:USF1:USF2	BGTCACATGGT	0.001	-7.647	0.0083	6	10.71%	220.3	1.76%
M10540_3.00:STAT5A:STAT5B	ATTTCYAAGAAA	0.001	-7.647	0.0083	6	10.71%	220.2	1.75%
M10544_3.00:STAT5A:STAT5B	ATTTCYAAGAAA	0.001	-7.647	0.0083	6	10.71%	220.2	1.75%
M02985_3.00:MITF:TFEB	RTCACGTGAC	0.001	-7.624	0.0084	6	10.71%	221.1	1.76%
M04463_3.00:ATF1:CREB1:CREM	TACGTCACN	0.001	-7.624	0.0084	6	10.71%	221.1	1.76%
M10383_3.00:MYB:MYBL1	RGWGRCAGTTGR	0.001	-7.592	0.0086	8	14.29%	413.2	3.29%
M11071_3.00:ATF1:CREB1:CREM	TKACGTCA	0.001	-7.587	0.0087	16	28.57%	1463	11.66%
M04221_3.00:ATF2	ATGACGTCAC	0.001	-7.577	0.0087	6	10.71%	223.1	1.78%
M10952_3.00:MYF5:MYF6:MYOD1:MYOG	CAGCTG	0.001	-7.574	0.0087	38	67.86%	5662.6	45.12%
M09928_3.00:FOS:FOSB:FOSL1:FOSL2	GRRTGAGTCAYC	0.001	-7.531	0.0091	6	10.71%	225.1	1.79%
M09944_3.00:FOS:FOSB:FOSL1:FOSL2	GRRTGAGTCAYC	0.001	-7.531	0.0091	6	10.71%	225.1	1.79%
M10991_3.00:USF1:USF2	WDRHCACGTGDYHW	0.001	-7.531	0.0091	6	10.71%	225.7	1.80%
M10050_3.00:ZFP42	AAAATGGCTGCC	0.001	-7.521	0.0091	4	7.14%	81	0.65%
M12546_3.00:DNTTIP1	CATGCAAC	0.001	-7.516	0.0092	10	17.86%	645.9	5.15%
M00444_3.00:HOXA13:HOXB13:HOXC13:HOXD13	TTTTATDRGN	0.001	-7.515	0.0092	18	32.14%	1786.5	14.24%
M05021_3.00:FOXA1:FOXA2:FOXA3:FOXB1	WTRTTTACAYAV	0.001	-7.508	0.0092	6	10.71%	226.6	1.81%
M09270_3.00:ZNF569	GGAWWAGTAG	0.001	-7.508	0.0092	6	10.71%	226.1	1.80%
M10405_3.00:ESR1:ESR2:NR1D1:NR1D2:NR1H2:NR1H3:NR1H4:NR2C1:NR2C2:NR2F1:NR2F2:NR2F6:NR4A1:NR4A2:NR4A3:NR5A1:NR5A2:NR6A1:PPARA:PPARD:PPARG:RARA:RARB:RARG:RORA:RORB:RORC:RXRA:RXRB:RXRG:THRB	GAAASTRGGTCA	0.001	-7.508	0.0092	6	10.71%	227	1.81%
M10447_3.00:ESR1:ESR2:NR1D1:NR1D2:NR1H2:NR1H3:NR1H4:NR2C1:NR2C2:NR2F1:NR2F2:NR2F6:NR4A1:NR4A2:NR4A3:NR5A1:NR5A2:NR6A1:PPARA:PPARD:PPARG:RARA:RARB:RARG:RORA:RORB:RORC:RXRA:RXRB:RXRG:THRA:THRB	GAAASTRGGTCA	0.001	-7.508	0.0092	6	10.71%	227	1.81%
M08996_3.00:GATA1:GATA2:GATA3:GATA4:GATA5:GATA6	AGATRDTATC	0.001	-7.486	0.0093	6	10.71%	227.7	1.81%
M11598_3.00:ELF5:SPI1:SPIB:SPIC	AGAGGAAGT	0.001	-7.486	0.0093	6	10.71%	227.6	1.81%
M02541_3.00:GMEB1:GMEB2	NBBGACGTCA	0.001	-7.482	0.0093	16	28.57%	1478	11.78%
M11641_3.00:ELF1:ELF2:ELF4:ELK1:ELK3:ELK4:ERF:ERG:ETS1:ETS2:ETV1:ETV2:ETV3:ETV3L:ETV4:ETV5:FEV:FLI1:GABPA	AGGAWGT	0.001	-7.451	0.0096	28	50.00%	3581.5	28.54%
M04329_3.00:ARNTL	NKCACRTGAC	0.001	-7.45	0.0096	12	21.43%	906.6	7.22%
M09969_3.00:JUN:JUNB:JUND	GGRTGAGTCAY	0.001	-7.441	0.0097	6	10.71%	229.9	1.83%
M03853_3.00:CREBL2	GTKACGTCAT	0.001	-7.418	0.0099	6	10.71%	230.4	1.84%
M04884_3.00:CUX1:CUX2	KTATTGATYA	0.001	-7.374	0.0103	6	10.71%	232.9	1.86%
M08258_3.00:MYC	GMSCACGTGGC	0.001	-7.374	0.0103	6	10.71%	233	1.86%
M00099_3.00:FOXP3	TTGTTTAYN	0.001	-7.36	0.0104	18	32.14%	1809.4	14.42%
M02994_3.00:HEY1:HEY2:HEYL	GRCACGTGCC	0.001	-7.352	0.0105	6	10.71%	233.2	1.86%
M02997_3.00:HEY1	GRCACGTGCC	0.001	-7.33	0.0107	6	10.71%	234.3	1.87%
M03247_3.00:FOXC1:FOXC2:FOXD1:FOXD2:FOXD3:FOXD4:FOXD4L1:FOXD4L3:FOXD4L4:FOXD4L5:FOXD4L6:FOXE1:FOXE3:FOXF1:FOXF2:FOXG1:FOXI1:FOXI3:FOXJ3:FOXL1:FOXL2:FOXS1	TGTTTAC	0.001	-7.327	0.0107	18	32.14%	1814.1	14.46%
M05006_3.00:ELF1:ELF2:ELF4:ELK1:ELK3:ELK4:ERF:ERG:ETS1:ETS2:ETV1:ETV2:ETV3:ETV3L:ETV4:ETV5:FEV:FLI1:GABPA	GACCGGAAGTR	0.001	-7.316	0.0108	10	17.86%	662.9	5.28%
M09849_3.00:BHLHE40:BHLHE41	STCACGTGCY	0.001	-7.308	0.0109	6	10.71%	235.5	1.88%
M02040_3.00:E2F7:E2F8	TTCGCGCGAA	0.001	-7.305	0.0109	4	7.14%	86.3	0.69%
M02055_3.00:EHF:ELF1:ELF2:ELF4:ELK1:ELK3:ELK4:ERF:ERG:ETS1:ETS2:ETV1:ETV2:ETV3:ETV3L:ETV4:ETV5:FEV:FLI1:GABPA	WCCGGAAGH	0.001	-7.292	0.011	14	25.00%	1203.9	9.59%
M10384_3.00:MYB:MYBL1	RGWGGCAGTTGG	0.001	-7.287	0.011	8	14.29%	433	3.45%
M11144_3.00:CEBPD	RTTRBGCAA	0.001	-7.258	0.0113	24	42.86%	2863.8	22.82%
M04436_3.00:XBP1	SRTGACGTCAYS	0.001	-7.243	0.0114	6	10.71%	238.6	1.90%
M08953_3.00:STAT1	TTCCYRGAA	0.001	-7.243	0.0114	6	10.71%	238.4	1.90%
M01255_3.00:ZBTB44	NGATGCATCNN	0.001	-7.239	0.0115	12	21.43%	928.9	7.40%
M10577_3.00:HIF1A	BGCACGTA	0.001	-7.229	0.0116	12	21.43%	929.1	7.40%
M08205_3.00:JUN:JUNB:JUND	GRVTGAGTCAYC	0.001	-7.222	0.0116	6	10.71%	239.2	1.91%
M11663_3.00:FOXA1:FOXA2:FOXA3:FOXB1:FOXB2	TAARYAAAYATTNCA	0.001	-7.222	0.0116	4	7.14%	88.2	0.70%
M11819_3.00:NKX2-1:NKX2-2:NKX2-3:NKX2-4:NKX2-5:NKX2-6:NKX2-8	RRSCMCTTGAGNGV	0.001	-7.216	0.0117	26	46.43%	3244.3	25.85%
M10175_3.00:ELF1:ELF2:ELF4:ELK1:ELK3:ELK4:ERF:ERG:ETS1:ETS2:ETV1:ETV2:ETV3:ETV3L:ETV4:ETV5:FEV:FLI1:GABPA	RGRCAGGAAGTGG	0.001	-7.201	0.0118	6	10.71%	240.1	1.91%
M10937_3.00:USF2	GGTCACGTGGBNN	0.001	-7.201	0.0118	6	10.71%	240.2	1.91%
M02924_3.00:EOMES:TBR1:TBX21	AAGGTGTGAA	0.001	-7.181	0.012	4	7.14%	89	0.71%
M11887_3.00:ALX1:ALX3:ALX4:ARX:BARHL1:BARHL2:BARX1:BARX2:BSX:DLX1:DLX2:DLX3:DLX4:DLX5:DLX6:DRGX:EMX1:EMX2:EN1:EN2:ESX1:EVX1:EVX2:GBX1:GBX2:GSX1:GSX2:HMX1:HMX2:HMX3:HOXA1:HOXA2:HOXA3:HOXA4:HOXA5:HOXB1:HOXB2:HOXB3:HOXB4:HOXB5:HOXC4:HOXC5:HOXD1:HOXD3:HOXD4:ISX:LHX2:LHX3:LHX4:LHX9:MEOX1:MIXL1:MNX1:MSX1:MSX2:NKX1-1:NKX1-2:NOBOX:NOTO:OTP:PDX1:PHOX2A:PHOX2B:PROP1:PRRX1:PRRX2:RAX:RAX2:SEBOX:SHOX:SHOX2:TL…	WATTAAWTTA	0.001	-7.181	0.012	4	7.14%	89.8	0.72%
M08691_3.00:FOSL2	GRTGACTCAB	0.001	-7.158	0.0122	6	10.71%	242.3	1.93%
M01583_3.00:CUX1:CUX2	TKATYGRTD	0.001	-7.154	0.0123	20	35.71%	2174.9	17.33%
M10543_3.00:STAT5A:STAT5B	TTTCYTGGAA	0.001	-7.137	0.0124	6	10.71%	243.2	1.94%
M02580_3.00:EOMES:TBX2:TBX20:TBX3:TBX4:TBX5	AGGTGTBA	0.001	-7.117	0.0127	12	21.43%	941.4	7.50%
M04474_3.00:BATF:BATF3	SRTGACGTCAYC	0.001	-7.117	0.0127	6	10.71%	244.5	1.95%
M01886_3.00:ATF1:CREB1:CREM	TACGTCAY	0.001	-7.1	0.0129	10	17.86%	681.8	5.43%
M11602_3.00:ELF1:ELF2:ELF4:ELK1:ELK3:ELK4:ERF:ERG:ETS1:ETS2:ETV1:ETV2:ETV3:ETV3L:ETV4:ETV5:FEV:FLI1:GABPA	ACAGGAAG	0.001	-7.091	0.0129	22	39.29%	2533	20.18%
M02012_3.00:DMRT1:DMRT2:DMRT3:DMRTA2:DMRTB1:DMRTC2	HNGWWACAWW	0.001	-7.074	0.0131	16	28.57%	1533.9	12.22%
M10612_3.00:ATF3:JDP2	DATGASTCATHN	0.001	-7.054	0.0134	6	10.71%	247.4	1.97%
M00705_3.00:MYT1L:ST18	CAAACTTT	0.001	-7.043	0.0135	12	21.43%	949	7.56%
M00283_3.00:BCL6	TTCCTVGAAA	0.001	-7.018	0.0138	16	28.57%	1541.6	12.28%
M05251_3.00:NKX2-1:NKX2-2:NKX2-3:NKX2-4:NKX2-5:NKX2-6:NKX2-8	STCAACGMB	0.001	-7.018	0.0138	16	28.57%	1541.1	12.28%
M04971_3.00:ELF1:ELF2:ELF4:ELK1:ELK3:ELK4:ERF:ERG:ETS1:ETS2:ETV1:ETV2:ETV3:ETV3L:ETV4:ETV5:FEV:FLI1:GABPA	GACCGGAAGTV	0.001	-7.013	0.0138	6	10.71%	249.4	1.99%
M01897_3.00:CEBPA:CEBPB:CEBPE	TTWCGCAA	0.001	-6.979	0.0143	12	21.43%	956.6	7.62%
M01104_3.00:GLI2:GLI3	NTGGGTGGTCN	0.001	-6.956	0.0146	10	17.86%	694.2	5.53%
M06414_3.00:JUN:JUNB:JUND	RATGASTCAYC	0.001	-6.953	0.0146	6	10.71%	252.8	2.01%
M10766_3.00:STAT6	TTCYYRRGAAVT	0.001	-6.933	0.0149	6	10.71%	253.1	2.02%
M08033_3.00:ZNF202	GGASGMGG	0.001	-6.925	0.015	12	21.43%	962.8	7.67%
M04469_3.00:ATF1:CREB1:CREM	NRTGACGTCAYN	0.001	-6.913	0.0151	6	10.71%	254.4	2.03%
M06226_3.00:JUN:JUNB:JUND	ATGACGTCAT	0.001	-6.913	0.0151	6	10.71%	254.1	2.02%
M04555_3.00:MAF:MAFA:MAFB:MAFG:MAFK:NRL	HGTCAGCANWWTT	0.001	-6.909	0.0151	4	7.14%	96.1	0.77%
M11321_3.00:EGR1:EGR2:EGR3:EGR4	HGTGGGHGGG	0.01	-6.907	0.0151	20	35.71%	2216.7	17.66%
M02578_3.00:TBX2:TBX3:TBX4:TBX5	DAGGTGTBAR	0.01	-6.906	0.0151	16	28.57%	1557.2	12.41%
M04364_3.00:NEUROD1:NEUROD2:NEUROD4:NEUROD6	RCCATATGTY	0.01	-6.893	0.0153	6	10.71%	256	2.04%
M02996_3.00:USF1:USF2	RTCACGTGAY	0.01	-6.873	0.0155	6	10.71%	256.4	2.04%
M04263_3.00:MITF:TFE3	NGTCACATGBY	0.01	-6.873	0.0155	6	10.71%	256.1	2.04%
M10661_3.00:ELF5:SPI1:SPIB:SPIC	AGAGGAAGTG	0.01	-6.873	0.0155	6	10.71%	256.8	2.05%
M09455_3.00:IKZF1:IKZF2:IKZF3	GSMNGGGAA	0.01	-6.872	0.0155	30	53.57%	4104	32.70%
M06559_3.00:KLF1:KLF12:KLF2:KLF3:KLF4:KLF5:KLF6:KLF7	GGGCGTDGYC	0.01	-6.854	0.0158	12	21.43%	970.1	7.73%
M06514_3.00:SP1:SP3:SP5:SP6:SP8:SP9	VRGKGGGCGKGGCC	0.01	-6.854	0.0158	6	10.71%	257.6	2.05%
M10361_3.00:IRF7	GAAASYGAAA	0.01	-6.831	0.016	8	14.29%	465.9	3.71%
M10367_3.00:IRF7	GAAASYGAAA	0.01	-6.831	0.016	8	14.29%	465.9	3.71%
M12377_3.00:RUNX1:RUNX2:RUNX3	BNVACCACA	0.01	-6.82	0.0162	20	35.71%	2231.8	17.78%
M02266_3.00:HHEX	NNDATTRBNN	0.01	-6.813	0.0163	36	64.29%	5395.9	43.00%
M05367_3.00:ALX1:ALX3:ALX4:ARX:BARHL1:BARHL2:BARX1:BARX2:BSX:DLX1:DLX2:DLX3:DLX4:DLX5:DLX6:DRGX:EMX1:EMX2:EN1:EN2:ESX1:EVX1:EVX2:GBX1:GBX2:GSX1:GSX2:HMX1:HMX2:HMX3:HOXA1:HOXA2:HOXA3:HOXA4:HOXA5:HOXA6:HOXA7:HOXB1:HOXB2:HOXB3:HOXB4:HOXB5:HOXB6:HOXB7:HOXB8:HOXC4:HOXC5:HOXC6:HOXD1:HOXD3:HOXD4:HOXD8:ISX:LHX3:LHX4:MEOX1:MEOX2:MIXL1:MNX1:MSX1:MSX2:NANOG:NANOGP8:NKX1-1:NKX1-2:NOBOX:NOTO:OTP:PDX1:PHOX2A:P…	CTAATTAC	0.01	-6.81	0.0163	16	28.57%	1571.9	12.53%
M06594_3.00:FOXO1:FOXO3:FOXO4:FOXO6	TGTTTAYGA	0.01	-6.806	0.0163	10	17.86%	708.3	5.64%
M10551_3.00:EOMES:TBR1:TBX21	GGAGGTGTGARD	0.01	-6.783	0.0167	16	28.57%	1575.4	12.55%
M06251_3.00:ELF1:ELF2:ELF4:ELK1:ELK3:ELK4:ERF:ERG:ETS1:ETS2:ETV1:ETV2:ETV3:ETV3L:ETV4:ETV5:FEV:FLI1:GABPA	ACCGGAARTR	0.01	-6.776	0.0168	6	10.71%	261.2	2.08%
M08705_3.00:FOS:FOSB:FOSL1:FOSL2	ATGAGTCAT	0.01	-6.776	0.0168	6	10.71%	261.7	2.09%
M06351_3.00:TWIST1:TWIST2	ACCAGATGTB	0.01	-6.764	0.0169	8	14.29%	470.3	3.75%
M09951_3.00:FOS:FOSB:FOSL1:FOSL2	GRTGAGTCAYC	0.01	-6.756	0.017	6	10.71%	262.2	2.09%
M04600_3.00:PRDM1	DAGKGAAAGTGN	0.01	-6.737	0.0173	6	10.71%	263.9	2.10%
M10659_3.00:ELF1:ELF2:ELF4:ELK1:ELK3:ELK4:ERF:ERG:ETS1:ETS2:ETV1:ETV2:ETV3:ETV3L:ETV4:ETV5:FEV:FLI1:GABPA	ACAGGAAGTG	0.01	-6.732	0.0174	10	17.86%	715.6	5.70%
M10608_3.00:ATF1:CREB1:CREM	TGACGTCATC	0.01	-6.722	0.0175	10	17.86%	716.5	5.71%
M11619_3.00:ELF1:ELF2:ELF4:ELK1:ELK3:ELK4:ERF:ERG:ETS1:ETS2:ETV1:ETV2:ETV3:ETV3L:ETV4:ETV5:FEV:FLI1:GABPA	AGGAAGT	0.01	-6.703	0.0178	28	50.00%	3740.7	29.81%
M04328_3.00:ARNTL	GTCACGTGMN	0.01	-6.699	0.0179	6	10.71%	265.8	2.12%
M08259_3.00:MYC	GVSCACGTGGC	0.01	-6.68	0.0182	6	10.71%	266.3	2.12%
M11074_3.00:ATF1:CREB1:CREM	NNTKACGTCASB	0.01	-6.67	0.0183	10	17.86%	721.9	5.75%
M10535_3.00:STAT5A	TTTCCTRGAA	0.01	-6.661	0.0185	6	10.71%	267.1	2.13%
M05077_3.00:GATA1:GATA2:GATA3:GATA4:GATA5:GATA6	NWGATAAGRN	0.01	-6.66	0.0185	10	17.86%	722.9	5.76%
M11124_3.00:FOS:FOSB:FOSL1:FOSL2	TGAGTCAT	0.01	-6.652	0.0186	12	21.43%	993.5	7.92%
M00528_3.00:HOXA13:HOXB13:HOXC13:HOXD13	WTTTAYDRG	0.01	-6.635	0.0188	18	32.14%	1923	15.32%
M02995_3.00:HEY1:HEY2:HEYL	GRCACGTGYC	0.01	-6.624	0.019	6	10.71%	269.6	2.15%
M06074_3.00:ZNF70	GKTCNRWNYVRAGGAGGHYR	0.01	-6.623	0.019	4	7.14%	104.5	0.83%
M01105_3.00:GLI1:GLI2:GLI3	TGGGTGGTCN	0.01	-6.618	0.019	10	17.86%	726.9	5.79%
M02292_3.00:HMX1:HMX2:HMX3:HOXA4:HOXB4:HOXC4:HOXD4:TLX1:TLX2:TLX3:VAX1:VAX2:VENTX	RRVTACTTAA	0.01	-6.618	0.019	10	17.86%	726.3	5.79%
M08626_3.00:STAT3	YTTCCYGGAAR	0.01	-6.605	0.0192	6	10.71%	270.6	2.16%
M09022_3.00:STAT1	TTTCCBGGAA	0.01	-6.605	0.0192	6	10.71%	270	2.15%
M00789_3.00:EOMES:TBR1	NAGGTGTKAN	0.01	-6.592	0.0194	12	21.43%	1000.3	7.97%
M01560_3.00:ELF1:ELF2:ELF4:ELK1:ELK3:ELK4:ERF:ERG:ETS1:ETS2:ETV1:ETV2:ETV3:ETV3L:ETV4:ETV5:FEV:FLI1:GABPA	NRCCGGAAGT	0.01	-6.588	0.0195	10	17.86%	729.7	5.81%
M02133_3.00:MEIS3	NNTGACAGBT	0.01	-6.576	0.0197	38	67.86%	5907.2	47.07%
M04897_3.00:DMRT1:DMRT2:DMRT3:DMRTA2:DMRTB1:DMRTC2	HATTGWTACAWT	0.01	-6.569	0.0198	6	10.71%	272.2	2.17%
M01831_3.00:BHLHA15	CCATATGT	0.01	-6.567	0.0198	14	25.00%	1296	10.33%
M03238_3.00:FOXC1:FOXC2:FOXD1:FOXD2:FOXD3:FOXD4:FOXD4L1:FOXD4L3:FOXD4L4:FOXD4L5:FOXD4L6:FOXE1:FOXE3:FOXF1:FOXF2:FOXG1:FOXI1:FOXI3:FOXL1:FOXL2:FOXS1	TGTTTAY	0.01	-6.567	0.0198	14	25.00%	1296.5	10.33%
M04577_3.00:MAF:MAFA:MAFB:MAFG:MAFK	YAHGTCAGCA	0.01	-6.557	0.0199	10	17.86%	732.9	5.84%
M02999_3.00:NEUROD1:NEUROD2:NEUROD4:NEUROD6	RMCATATGGY	0.01	-6.55	0.02	6	10.71%	273	2.18%
M10996_3.00:NEUROD1:NEUROD2:NEUROD4:NEUROD6	RCCATATGKY	0.01	-6.55	0.02	6	10.71%	273	2.18%
M11087_3.00:ATF4	GVTGAYGTAAKS	0.01	-6.547	0.02	10	17.86%	733.1	5.84%
M10561_3.00:TEAD1:TEAD3:TEAD4	ACATTCCAGGV	0.01	-6.532	0.0203	6	10.71%	275	2.19%
M11774_3.00:ALX1:ALX3:ALX4:ARX:BARX1:BARX2:BSX:DLX1:DLX2:DLX3:DLX4:DLX5:DLX6:DRGX:EMX1:EMX2:EN1:EN2:ESX1:EVX1:EVX2:GBX1:GBX2:GSX1:GSX2:HMX1:HMX3:HOXA1:HOXA2:HOXA3:HOXA4:HOXA5:HOXA7:HOXB1:HOXB2:HOXB3:HOXB4:HOXB5:HOXB7:HOXC4:HOXC5:HOXD1:HOXD3:HOXD4:ISX:LHX3:LHX4:MEOX1:MEOX2:MIXL1:MNX1:MSX1:MSX2:NANOG:NANOGP8:NKX1-1:NKX1-2:NOTO:OTP:PDX1:PHOX2A:PHOX2B:PROP1:PRRX1:PRRX2:RAX:RAX2:SEBOX:SHOX:SHOX2:UNCX:…	VMHAWTABG	0.01	-6.532	0.0203	24	42.86%	3006.4	23.96%
M11596_3.00:ELF5:SPI1:SPIB:SPIC	AGAGGAAG	0.01	-6.5	0.0209	22	39.29%	2644.5	21.07%
M03762_3.00:TBX2:TBX20:TBX3:TBX4:TBX5	AGGTGTGA	0.01	-6.496	0.021	16	28.57%	1618.5	12.90%
M00212_3.00:ELF1:ELF2:ELF4:ELK1:ELK3:ELK4:ERF:ERG:ETS1:ETS2:ETV1:ETV2:ETV3:ETV3L:ETV4:ETV5:FEV:FLI1:GABPA	NACCGGAAGT	0.01	-6.478	0.0212	6	10.71%	277.6	2.21%
M03852_3.00:ATF3:FOSB:JDP2	SRTGACGTCAYS	0.01	-6.478	0.0212	6	10.71%	277.2	2.21%
M08841_3.00:ELF1:ELF2:ELF4:ELK1:ELK3:ELK4:ERF:ERG:ETS1:ETS2:ETV1:ETV2:ETV3:ETV3L:ETV4:ETV5:FEV:FLI1:GABPA	CCGGAAGTG	0.01	-6.478	0.0212	6	10.71%	277.5	2.21%
M11617_3.00:ELF1:ELF2:ELF4:ELK1:ELK3:ELK4:ERF:ERG:ETS1:ETS2:ETV1:ETV2:ETV3:ETV3L:ETV4:ETV5:FEV:FLI1:GABPA	VNACMGGAWRTTN	0.01	-6.477	0.0212	10	17.86%	740.4	5.90%
M06189_3.00:MYPOP	NTTWGCGCNNNN	0.01	-6.477	0.0212	8	14.29%	492.9	3.93%
M00389_3.00:HOXA3:HOXA4:HOXA5:HOXA6:HOXA7:HOXB3:HOXB4:HOXB5:HOXB6:HOXB7:HOXB8:HOXC4:HOXC5:HOXC6:HOXC8:HOXD3:HOXD4:HOXD8:PDX1	DTAAWDN	0.01	-6.464	0.0214	50	89.29%	9023.2	71.90%
M01079_3.00:CEBPG	NTTACGCAA	0.01	-6.464	0.0214	8	14.29%	493.5	3.93%
M08602_3.00:DRAP1	CTATAAAAGGC	0.01	-6.46	0.0214	6	10.71%	278.7	2.22%
M08977_3.00:BACH1:BACH2	GTCACGTG	0.01	-6.457	0.0215	10	17.86%	742.8	5.92%
M12373_3.00:RFX5:RFX7	AACTGATG	0.01	-6.442	0.0218	6	10.71%	279.7	2.23%
M02544_3.00:GMEB1:GMEB2	TACGTVA	0.01	-6.428	0.022	44	78.57%	7395.7	58.93%
M08655_3.00:MYCN	CCACGTGG	0.01	-6.424	0.0221	6	10.71%	281	2.24%
M00501_3.00:ALX1:ALX3:ALX4:ARX:BARHL1:BARHL2:BARX1:BARX2:BSX:DLX1:DLX2:DLX3:DLX4:DLX5:DLX6:DRGX:EMX1:EMX2:EN1:EN2:ESX1:EVX1:EVX2:GBX1:GBX2:GSX1:GSX2:HMX1:HMX2:HMX3:HOXA1:HOXA2:HOXA3:HOXA4:HOXA5:HOXA6:HOXA7:HOXB1:HOXB2:HOXB3:HOXB4:HOXB5:HOXB6:HOXB7:HOXB8:HOXC4:HOXC5:HOXC6:HOXD1:HOXD3:HOXD4:HOXD8:ISX:LHX3:LHX4:MEOX1:MEOX2:MIXL1:MNX1:MSX1:MSX2:NANOG:NANOGP8:NKX1-1:NKX1-2:NOBOX:NOTO:OTP:PDX1:PHOX2A:P…	NTAATKRN	0.01	-6.419	0.0222	36	64.29%	5494.4	43.78%
M11707_3.00:GATA1:GATA2:GATA3:GATA4:GATA5:GATA6	GNNDSAGATAAGNNN	0.01	-6.417	0.0222	10	17.86%	746.9	5.95%
M10657_3.00:EHF:ELF1:ELF2:ELF3:ELF4:ELF5:ETV6:ETV7:SPI1:SPIC	ACVAGGAAGT	0.01	-6.406	0.0223	6	10.71%	281.8	2.25%
M11083_3.00:NFE2:NFE2L1:NFE2L2:NFE2L3	CTGAGTCAT	0.01	-6.406	0.0223	6	10.71%	281.8	2.25%
M11088_3.00:ATF4	SMTGACGTM	0.01	-6.402	0.0224	20	35.71%	2306.5	18.38%
M10927_3.00:TFAP4	RMCAGCTGC	0.01	-6.393	0.0226	22	39.29%	2665.8	21.24%
M03195_3.00:ELF1:ERF:ETV6	MGCGGAAGTG	0.01	-6.371	0.023	6	10.71%	283.8	2.26%
M04999_3.00:ELF1:ELF2:ELF4:ELK1:ELK3:ELK4:ERF:ERG:ETS1:ETS2:ETV1:ETV2:ETV3:ETV3L:ETV4:ETV5:FEV:FLI1:GABPA	RACCGGAAGTR	0.01	-6.371	0.023	6	10.71%	284	2.26%
M08427_3.00:GATA1:GATA2:GATA3:GATA4:GATA5:GATA6	DSAGATAAGR	0.01	-6.368	0.023	10	17.86%	751.2	5.99%
M11381_3.00:SP7:SP8:SP9	CBMGGGGGCGG	0.01	-6.367	0.023	16	28.57%	1638.8	13.06%
M04671_3.00:ZNF740	GTGGGGGGGGCRG	0.01	-6.36	0.0231	4	7.14%	112.4	0.90%
M02977_3.00:MITF:TFE3	AYCACGTGAC	0.01	-6.354	0.0232	6	10.71%	284.2	2.26%
M04271_3.00:TFAP4	AWCAGCTGWT	0.01	-6.284	0.0248	6	10.71%	288.3	2.30%
M09920_3.00:JUN:JUNB:JUND	GRTGAGTCAYY	0.01	-6.284	0.0248	6	10.71%	288.5	2.30%
M04960_3.00:EHF:ELF1:ELF2:ELF3:ELF4:ELF5:ETV6:ETV7:SPI1:SPIC	NABGMGGAAGTR	0.01	-6.278	0.0249	14	25.00%	1336.6	10.65%
M01833_3.00:ARNTL	NGTCACGTGH	0.01	-6.267	0.0251	6	10.71%	289.5	2.31%
M04237_3.00:ATF3:JDP2	RTGAGTCAT	0.01	-6.267	0.0251	6	10.71%	289.3	2.31%
M01987_3.00:ONECUT1:ONECUT2:ONECUT3	DTATYGATY	0.01	-6.26	0.0253	12	21.43%	1040.8	8.29%
M00197_3.00:ZNF691	AGGAGCAC	0.01	-6.246	0.0256	18	32.14%	1989.2	15.85%
M09884_3.00:BHLHE40:BHLHE41	GTCACGTGC	0.01	-6.233	0.0259	6	10.71%	291.2	2.32%
M06755_3.00:HHEX	TTBAATTA	0.01	-6.227	0.026	16	28.57%	1660.2	13.23%
M01799_3.00:TFAP4	AHCAGCTGG	0.01	-6.218	0.0262	30	53.57%	4258	33.93%
M00850_3.00:KLF1:KLF12:KLF3:KLF5:KLF8	DGGGYGKGGY	0.01	-6.216	0.0262	34	60.71%	5105.7	40.69%
M10180_3.00:ELF1:ELF2:ELF4:ELK1:ELK3:ELK4:ERF:ERG:ETS1:ETS2:ETV1:ETV2:ETV3:ETV3L:ETV4:ETV5:FEV:FLI1:GABPA	RGRCAGGAAGYGG	0.01	-6.213	0.0262	10	17.86%	767.2	6.11%
M01812_3.00:MSC:TCF21	DMCATATGKH	0.01	-6.209	0.0263	16	28.57%	1663.9	13.26%
M03522_3.00:POU3F4	TGCATAAWTTA	0.01	-6.205	0.0264	4	7.14%	118	0.94%
M01564_3.00:ELF1:ELF2:ELF4:ELK1:ELK3:ELK4:ERF:ERG:ETS1:ETS2:ETV1:ETV2:ETV3:ETV3L:ETV4:ETV5:FEV:FLI1:GABPA	ACCGGAAGT	0.01	-6.199	0.0264	6	10.71%	293.6	2.34%
M03024_3.00:ATOH1	RVCATATGTT	0.01	-6.199	0.0264	6	10.71%	293.2	2.34%
M04494_3.00:ATF3:JDP2	NRTGACGTCAYS	0.01	-6.199	0.0264	6	10.71%	293.5	2.34%
M08166_3.00:ZNF480	RRGGAATGWGTD	0.01	-6.196	0.0265	12	21.43%	1048.7	8.36%
M01106_3.00:GLI1:GLI2:GLI3	TGGGTGGTCN	0.01	-6.175	0.027	10	17.86%	771.3	6.15%
M12175_3.00:MYB:MYBL1	YAACTGNCNSY	0.01	-6.166	0.0272	14	25.00%	1352.4	10.78%
M04400_3.00:BHLHA15	RCCATATGGY	0.01	-6.166	0.0272	6	10.71%	295	2.35%
M00213_3.00:EHF:ELF1:ELF2:ELF3:ELF4:ELF5:ETV6:ETV7:FEV	ANSCGGAAGT	0.01	-6.165	0.0272	16	28.57%	1670.3	13.31%
M01576_3.00:EHF:ELF1:ELF2:ELF3:ELF4:ELF5:ELK1:ELK3:ELK4:ERF:ERG:ETS1:ETS2:ETV1:ETV2:ETV3:ETV3L:ETV4:ETV5:ETV6:ETV7:FEV:FLI1:GABPA:SPDEF	WNCCGGAAGT	0.01	-6.159	0.0272	16	28.57%	1671.2	13.32%
M02191_3.00:ALX1:ALX3:ALX4:ARX:DRGX:ESX1:GBX1:GBX2:HESX1:ISX:LHX3:LHX6:LHX8:LMX1A:LMX1B:MIXL1:OTP:PHOX2A:PHOX2B:PROP1:PRRX1:PRRX2:RAX:RAX2:SEBOX:SHOX:SHOX2:UNCX:VSX1:VSX2:ZFHX2	YTAATCAW	0.01	-6.159	0.0272	16	28.57%	1671.1	13.32%
M08744_3.00:BCL11A:BCL11B	TGGTCAG	0.01	-6.152	0.0274	20	35.71%	2353.6	18.75%
M12526_3.00:TEAD2:TEAD3:TEAD4	CCCCGCCCCCV	0.01	-6.133	0.0278	18	32.14%	2009.3	16.01%
M03216_3.00:FOXP3	TGTTTAC	0.01	-6.11	0.0284	18	32.14%	2013.1	16.04%
M10656_3.00:EHF:ELF1:ELF2:ELF3:ELF4:ELF5:ETV6:ETV7:FEV	AVCAGGAAGT	0.01	-6.101	0.0287	12	21.43%	1060.4	8.45%
M06002_3.00:TBX15:TBX18:TBX20:TBX22	NRAGGTGTGAAA	0.01	-6.086	0.029	4	7.14%	121.7	0.97%
M11376_3.00:SP2	GNGGGGGGCGGGGCS	0.01	-6.083	0.0291	6	10.71%	300.3	2.39%
M06102_3.00:CAMTA1:CAMTA2	TGCCGCADTGNNTNN	0.01	-6.066	0.0295	32	57.14%	4713.6	37.56%
M10723_3.00:MYBL2	BRRCVGTTDN	0.01	-6.017	0.031	20	35.71%	2379.9	18.96%
M08725_3.00:ZNF263	GGGAGGA	0.01	-6.008	0.0312	12	21.43%	1072.3	8.54%
M04286_3.00:MLX	KRKCACGTGCD	0.01	-6.002	0.0313	6	10.71%	305.7	2.44%
M06040_3.00:CREB3L3	TGCSACGTSANM	0.01	-6.002	0.0313	6	10.71%	305.6	2.44%
M06252_3.00:ELF1:ELF2:ELF4:ELK1:ELK3:ELK4:ERF:ERG:ETS1:ETS2:ETV1:ETV2:ETV3:ETV3L:ETV4:ETV5:FEV:FLI1:GABPA	ACCGGAAGTDN	0.01	-6.002	0.0313	6	10.71%	305.6	2.44%
M03754_3.00:EOMES:TBR1:TBX21	AAGGTGTGAA	0.01	-6	0.0313	4	7.14%	124.1	0.99%
M06216_3.00:FBXL19:KDM2A:KDM2B	NNNNNNNNTVCG	0.01	-5.995	0.0314	52	92.86%	9755.1	77.74%
M10341_3.00:POU2F2	MATTTGCATRT	0.01	-5.986	0.0315	6	10.71%	307	2.45%
M10347_3.00:POU2F2	MATTTGCATRT	0.01	-5.986	0.0315	6	10.71%	307	2.45%
M11254_3.00:MECOM	TATCTTGTC	0.01	-5.986	0.0315	6	10.71%	306.9	2.45%
M08940_3.00:RUNX1:RUNX2:RUNX3	TTGAGGTT	0.01	-5.984	0.0315	12	21.43%	1075.7	8.57%
M01074_3.00:ATF1:CREB1:CREM	TGACGTCAYN	0.01	-5.969	0.032	12	21.43%	1077.8	8.59%
M10555_3.00:TBP:TBPL2	CTATAAAARG	0.01	-5.922	0.0334	6	10.71%	310.2	2.47%
M11076_3.00:ATF1:CREB1:CREM	GVTKACGTCACV	0.01	-5.922	0.0334	6	10.71%	310.6	2.48%
M00902_3.00:TBX2:TBX20:TBX3:TBX4:TBX5	AGGTGTKA	0.01	-5.916	0.0336	12	21.43%	1084.1	8.64%
M00530_3.00:HOXA10:HOXA11:HOXA5:HOXA6:HOXA7:HOXA9:HOXB5:HOXB6:HOXB8:HOXB9:HOXC10:HOXC11:HOXC5:HOXC6:HOXC8:HOXC9:HOXD10:HOXD11:HOXD8:HOXD9	TTWATKRB	0.01	-5.914	0.0336	24	42.86%	3138.2	25.01%
M08694_3.00:ATF2	ATGACVTCAT	0.01	-5.907	0.0338	6	10.71%	311.9	2.49%
M06115_3.00:MAX	NNNNNNCACGTG	0.01	-5.901	0.0339	24	42.86%	3141.8	25.04%
M10900_3.00:ZBED6	CRGGCTCGCCBS	0.01	-5.891	0.0342	6	10.71%	312.6	2.49%
M08888_3.00:PBX1:PBX2:PBX3:PBX4	CATAAATCA	0.01	-5.862	0.0351	4	7.14%	129.1	1.03%
M12016_3.00:IRF1:IRF2	DNGAAAGTGAAAGYRA	0.01	-5.862	0.0351	4	7.14%	129.6	1.03%
M02990_3.00:MAX	AMCACGTGBY	0.01	-5.86	0.0351	6	10.71%	314.6	2.51%
M09943_3.00:ATF1:CREB1:CREM	STGACGTCAB	0.01	-5.844	0.0356	6	10.71%	315.6	2.52%
M11830_3.00:ALX1:ALX3:ALX4:ARX:BARHL1:BARHL2:BARX1:BARX2:BSX:DLX1:DLX2:DLX3:DLX4:DLX5:DLX6:DRGX:EMX1:EMX2:EN1:EN2:ESX1:EVX1:EVX2:GBX1:GBX2:GSX1:GSX2:HMX1:HMX2:HMX3:HOXA1:HOXA2:HOXA3:HOXA4:HOXA5:HOXA6:HOXA7:HOXB1:HOXB2:HOXB3:HOXB4:HOXB5:HOXB6:HOXB7:HOXB8:HOXC4:HOXC5:HOXC6:HOXD1:HOXD3:HOXD4:HOXD8:ISX:LHX3:LHX4:MEOX1:MEOX2:MIXL1:MNX1:MSX1:MSX2:NANOG:NANOGP8:NKX1-1:NKX1-2:NOBOX:NOTO:OTP:PDX1:PHOX2A:P…	HCATTAR	0.01	-5.834	0.036	24	42.86%	3156.2	25.15%
M10790_3.00:EHF:ELF1:ELF2:ELF3:ELF4:ELF5:ELK1:ELK3:ELK4:ERF:ERG:ETS1:ETS2:ETV1:ETV2:ETV3:ETV3L:ETV4:ETV5:ETV6:ETV7:FEV:FLI1:GABPA:SPDEF	AAHCMGGAAGT	0.01	-5.814	0.0366	6	10.71%	317.1	2.53%
M11790_3.00:BARHL1:BARHL2:BARX1:BARX2:BSX:DLX1:DLX2:DLX3:DLX4:DLX5:DLX6:EVX1:EVX2:GBX1:GBX2:HMX1:HMX2:HMX3:HOXA1:HOXA2:HOXA3:HOXB1:HOXB2:HOXB3:HOXD1:HOXD3:MEOX1:MEOX2:MNX1:MSX1:MSX2:NANOG:NANOGP8:PDX1:VENTX	TGATATGCA	0.01	-5.81	0.0367	12	21.43%	1098.6	8.75%
M04548_3.00:MAF:MAFA:MAFB:MAFG:MAFK:NRL	HGTCAGCAN	0.01	-5.803	0.0369	16	28.57%	1730.9	13.79%
M05263_3.00:BARX1:BARX2:BSX:DLX1:DLX2:DLX3:DLX4:DLX5:DLX6:EMX1:EMX2:EN1:EN2:EVX1:EVX2:GBX1:GBX2:GSX1:GSX2:HOXA1:HOXA2:HOXA3:HOXA4:HOXA5:HOXB1:HOXB2:HOXB3:HOXB4:HOXB5:HOXC4:HOXC5:HOXD1:HOXD3:HOXD4:ISX:MEOX1:MEOX2:MNX1:MSX1:MSX2:NANOG:NANOGP8:NKX1-1:NKX1-2:PDX1:PROP1:SHOX:SHOX2:UNCX:VAX1:VAX2:VENTX	DTAAYGAB	0.01	-5.799	0.037	30	53.57%	4361.8	34.76%
M03192_3.00:EHF:ELF1:ELF2:ELF3:ELF4:ELF5:ETV6:ETV7:SPI1:SPIC	ACCCGGAAGTD	0.01	-5.798	0.037	6	10.71%	318	2.53%
M12381_3.00:RUNX1:RUNX2:RUNX3	ACCACA	0.01	-5.794	0.0371	26	46.43%	3553.5	28.32%
M01566_3.00:EHF:ELF1:ELF2:ELF3:ELF4:ELF5:ETV6:ETV7:FEV	ANSCGGAAGT	0.01	-5.785	0.0374	16	28.57%	1733.3	13.81%
M10911_3.00:MLXIPL	VGRDGKCACGTG	0.01	-5.783	0.0374	6	10.71%	319.6	2.55%
M03520_3.00:POU3F1	ATGMATAATTTA	0.01	-5.781	0.0374	4	7.14%	132.4	1.06%
M03524_3.00:POU3F3	ATGCATAAWTTA	0.01	-5.781	0.0374	4	7.14%	132.2	1.05%
M01577_3.00:ELF1:ELF2:ELF4:ELK1:ELK3:ELK4:ERF:ERG:ETS1:ETS2:ETV1:ETV2:ETV3:ETV3L:ETV4:ETV5:ETV6:FEV:FLI1:GABPA	NACCGGAARY	0.01	-5.773	0.0376	16	28.57%	1735.6	13.83%
M05256_3.00:BARX1:BARX2:BSX:EMX1:EMX2:EN1:EN2:EVX1:EVX2:GBX1:GBX2:GSX1:GSX2:HMX1:HMX2:HMX3:HOXA1:HOXA2:HOXA3:HOXA4:HOXA5:HOXA6:HOXA7:HOXA9:HOXB1:HOXB2:HOXB3:HOXB4:HOXB5:HOXB6:HOXB7:HOXB8:HOXB9:HOXC4:HOXC5:HOXC6:HOXC8:HOXC9:HOXD1:HOXD3:HOXD4:HOXD8:HOXD9:ISX:MEOX1:MEOX2:MNX1:NKX1-1:NKX1-2:NOTO:OTP:PDX1:VAX1:VAX2:VENTX	BTAATKRC	0.01	-5.769	0.0377	20	35.71%	2428.7	19.35%
M02978_3.00:MNT	DGCACGTGBT	0.01	-5.768	0.0377	6	10.71%	320.8	2.56%
M10181_3.00:ELF1:ELF2:ELF4:ELK1:ELK3:ELK4:ERF:ERG:ETS1:ETS2:ETV1:ETV2:ETV3:ETV3L:ETV4:ETV5:FEV:FLI1:GABPA	GRVRGGAARMRGA	0.01	-5.764	0.0377	20	35.71%	2429.3	19.36%
M10197_3.00:ELF1:ELF2:ELF4:ELK1:ELK3:ELK4:ERF:ERG:ETS1:ETS2:ETV1:ETV2:ETV3:ETV3L:ETV4:ETV5:FEV:FLI1:GABPA	GRVRGGAARMRGA	0.01	-5.764	0.0377	20	35.71%	2429.3	19.36%
M03764_3.00:EOMES:TBR1:TBX21	AGGTGTGAAA	0.01	-5.755	0.0378	4	7.14%	133.9	1.07%
M04078_3.00:ALX1:ALX3:ALX4:ARX:BARX1:BARX2:BSX:DLX2:DLX3:DLX4:DLX5:DRGX:EMX1:EMX2:EN1:EN2:ESX1:EVX1:EVX2:GBX1:GBX2:GSX1:GSX2:HESX1:HOXA2:HOXA3:HOXB1:HOXB2:HOXB3:HOXD3:ISX:LBX1:LBX2:LHX1:LHX2:LHX3:LHX4:LHX5:LHX6:LHX8:LHX9:LMX1A:LMX1B:MEOX1:MIXL1:MNX1:MSX1:MSX2:NKX1-1:NKX1-2:NOBOX:NOTO:OTP:PDX1:PHOX2A:PHOX2B:PROP1:PRRX1:PRRX2:RAX:RAX2:SEBOX:SHOX:SHOX2:UNCX:VAX1:VAX2:VSX1:VSX2:ZFHX2:ZFHX3	NTAATBNVATTAN	0.01	-5.755	0.0378	4	7.14%	133.1	1.06%
M08606_3.00:GLI2:GLI3	STGGGTGGTCY	0.01	-5.755	0.0378	4	7.14%	133.7	1.07%
M10253_3.00:HOXA10:HOXA11:HOXA5:HOXA6:HOXA7:HOXA9:HOXB5:HOXB6:HOXB8:HOXB9:HOXC10:HOXC11:HOXC5:HOXC6:HOXC8:HOXC9:HOXD10:HOXD11:HOXD8:HOXD9	KATRATTTATGW	0.01	-5.755	0.0378	4	7.14%	133.5	1.06%
M10293_3.00:HOXA10:HOXA11:HOXA6:HOXA9:HOXB6:HOXB8:HOXB9:HOXC10:HOXC11:HOXC12:HOXC6:HOXC8:HOXC9:HOXD10:HOXD11:HOXD12:HOXD8:HOXD9	KATRATTTATGW	0.01	-5.755	0.0378	4	7.14%	133.5	1.06%
M04365_3.00:NEUROD1:NEUROD2:NEUROD4:NEUROD6	ARCATATGGY	0.01	-5.738	0.0384	6	10.71%	322.3	2.57%
M12512_3.00:TBP:TBPL2	CTTTTATAGN	0.01	-5.738	0.0384	6	10.71%	322.5	2.57%
M11588_3.00:EBF1	WGCNCCCCNGGG	0.01	-5.736	0.0384	24	42.86%	3178.9	25.33%
M11094_3.00:BATF:BATF3	GWDATGAGTC	0.01	-5.731	0.0385	10	17.86%	820.9	6.54%
M08314_3.00:YY1	AAGATGGCGGC	0.01	-5.729	0.0385	4	7.14%	134.2	1.07%
M09851_3.00:CLOCK	CAGMCACGTGMVSA	0.01	-5.723	0.0387	6	10.71%	323.2	2.58%
M09883_3.00:CLOCK	CAGMCACGTGMVSA	0.01	-5.723	0.0387	6	10.71%	323.2	2.58%
M07983_3.00:ZKSCAN2:ZSCAN29	GTTTTTTTY	0.01	-5.722	0.0387	18	32.14%	2084.5	16.61%
M12482_3.00:STAT5A	RTTTCTRRGAA	0.01	-5.708	0.0391	6	10.71%	324.1	2.58%
M00866_3.00:FOXO1:FOXO3:FOXO4:FOXO6	DTGTTTACN	0.01	-5.696	0.0396	18	32.14%	2089.8	16.65%
M06178_3.00:FBXL19:KDM2A:KDM2B	NNNNNTHNCGNN	0.01	-5.695	0.0396	20	35.71%	2443.8	19.47%
M01196_3.00:MLX	NDTCACGTGN	0.01	-5.693	0.0396	6	10.71%	325.1	2.59%
M01825_3.00:MLXIP	GCACGTGT	0.01	-5.693	0.0396	6	10.71%	325.1	2.59%
M04284_3.00:MLX	BCACGTGN	0.01	-5.693	0.0396	6	10.71%	325.1	2.59%
M10558_3.00:TEAD3:TEAD4	RCATTCCWGGVAK	0.01	-5.678	0.04	6	10.71%	327	2.61%
M12379_3.00:RUNX1:RUNX2:RUNX3	AACCACAV	0.01	-5.666	0.0404	20	35.71%	2449.2	19.52%
M09025_3.00:ZNF200	GGAAGT	0.01	-5.656	0.0408	20	35.71%	2451.4	19.53%
M11586_3.00:EBF1	VAATTCCCCTGRGA	0.01	-5.648	0.041	6	10.71%	328.2	2.62%
M05255_3.00:BARX1:BARX2:BSX:EMX1:EMX2:EN1:EN2:EVX1:EVX2:GBX1:GBX2:GSX1:GSX2:HMX1:HMX2:HMX3:HOXA1:HOXA2:HOXA3:HOXA4:HOXA5:HOXA6:HOXA7:HOXA9:HOXB1:HOXB2:HOXB3:HOXB4:HOXB5:HOXB6:HOXB7:HOXB8:HOXB9:HOXC4:HOXC5:HOXC6:HOXC8:HOXC9:HOXD1:HOXD3:HOXD4:HOXD8:HOXD9:ISX:MEOX1:MEOX2:MNX1:NKX1-1:NKX1-2:NOTO:OTP:PDX1:VAX1:VAX2:VENTX	BTAATTRC	0.01	-5.646	0.041	20	35.71%	2453.6	19.55%
M10168_3.00:EBF1:EBF2:EBF3:EBF4	STCCCCWGGGACY	0.01	-5.634	0.0414	6	10.71%	329.6	2.63%
M12009_3.00:IRF4:IRF8	GAAACTT	0.01	-5.634	0.0414	6	10.71%	329	2.62%
M05073_3.00:GATA1:GATA2:GATA3:GATA4:GATA5:GATA6	NWGATAASRN	0.01	-5.628	0.0416	10	17.86%	832.4	6.63%
M01292_3.00:CXXC4:CXXC5:TET3	NNDACGTN	0.01	-5.622	0.0418	34	60.71%	5262.7	41.94%
M05071_3.00:GATA1:GATA2:GATA3:GATA4:GATA5:GATA6	BWGATAASGN	0.01	-5.62	0.0419	10	17.86%	833.1	6.64%
M04398_3.00:ATOH7	RMCATATGKT	0.01	-5.619	0.0419	6	10.71%	330.2	2.63%
M10579_3.00:BHLHE40:BHLHE41	NGKCACGTGM	0.01	-5.619	0.0419	6	10.71%	331	2.64%
M10671_3.00:FOXA1:FOXA2:FOXA3	KTGTTTGC	0.01	-5.617	0.0419	20	35.71%	2459.1	19.60%
M03980_3.00:ALX1:ALX3:ALX4:ARX:BARX1:BARX2:BSX:DLX1:DLX2:DLX3:DLX4:DLX5:DLX6:DRGX:EMX1:EMX2:EN1:EN2:ESX1:EVX1:EVX2:GBX1:GBX2:GSX1:GSX2:HESX1:HOXA2:HOXA3:HOXB2:HOXB3:HOXD3:ISX:LBX1:LBX2:LHX1:LHX2:LHX3:LHX4:LHX5:LHX6:LHX8:LHX9:LMX1A:LMX1B:MEOX1:MIXL1:MNX1:MSX1:MSX2:NKX1-1:NKX1-2:NOBOX:NOTO:OTP:PDX1:PHOX2A:PHOX2B:PROP1:PRRX1:PRRX2:RAX:RAX2:SEBOX:SHOX:SHOX2:UNCX:VAX1:VAX2:VSX1:VSX2:ZFHX2:ZFHX3	TAATBNVATTA	0.01	-5.601	0.0424	4	7.14%	139.7	1.11%
M00879_3.00:MYPOP	NTTTGCGCCA	0.01	-5.576	0.0434	4	7.14%	140.3	1.12%
M04395_3.00:HES7	GGCACGTGYB	0.01	-5.576	0.0434	6	10.71%	333.3	2.66%
M09914_3.00:ATF1:CREB1:CREM	TGACGTCAYYN	0.01	-5.561	0.0439	6	10.71%	334.8	2.67%
M09947_3.00:ATF1:CREB1:CREM	TGACGTCAYYN	0.01	-5.561	0.0439	6	10.71%	334.8	2.67%
M01568_3.00:ELF1:ELF2:ELF4:ELK1:ELK3:ELK4:ERF:ERG:ETS1:ETS2:ETV1:ETV2:ETV3:ETV3L:ETV4:ETV5:FEV:FLI1:GABPA	NACCGGAARY	0.01	-5.561	0.0439	16	28.57%	1772.2	14.12%
M03297_3.00:MEIS3	SCTGTCAA	0.01	-5.561	0.0439	16	28.57%	1772.9	14.13%
M04276_3.00:TFAP4	AHCATATGDT	0.01	-5.552	0.0441	10	17.86%	841.1	6.70%
M00844_3.00:MZF1	KGGGGATY	0.01	-5.548	0.0443	12	21.43%	1134.5	9.04%
M06158_3.00:ZNF700	VRGDACCGTYWC	0.01	-5.544	0.0444	10	17.86%	842.5	6.71%
M10278_3.00:PBX3	SCTGTCAVTCA	0.01	-5.502	0.0462	10	17.86%	847.3	6.75%
M02858_3.00:ALX1:ALX3:ALX4:ARX:BARHL1:BARHL2:BARX1:BARX2:BSX:DLX1:DLX2:DLX3:DLX4:DLX5:DLX6:DRGX:EMX1:EMX2:EN1:EN2:ESX1:EVX1:EVX2:GBX1:GBX2:GSX1:GSX2:HMX1:HMX2:HMX3:HOXA1:HOXA2:HOXA3:HOXA4:HOXA5:HOXB1:HOXB2:HOXB3:HOXB4:HOXB5:HOXC4:HOXC5:HOXD1:HOXD3:HOXD4:ISX:LHX2:LHX3:LHX4:LHX9:MEOX1:MIXL1:MNX1:MSX1:MSX2:NKX1-1:NKX1-2:NOBOX:NOTO:OTP:PDX1:PHOX2A:PHOX2B:PROP1:PRRX1:PRRX2:RAX:RAX2:SEBOX:SHOX:SHOX2:TL…	TAATTR	0.01	-5.494	0.0465	24	42.86%	3234.2	25.77%
M09353_3.00:ZNF134	GGTGGGCMK	0.01	-5.492	0.0465	22	39.29%	2854.9	22.75%
M05147_3.00:CRX:DLX1:DLX2:DLX4:DLX5:EMX1:LHX2:LHX9:PITX1:PITX2:VAX1:VSX1	CTAATTAB	0.01	-5.491	0.0465	14	25.00%	1455.3	11.60%
M08438_3.00:BORCS8-MEF2B:MEF2A:MEF2B:MEF2C:MEF2D	DKCTATTTTTRGMHH	0.01	-5.479	0.0471	4	7.14%	144.2	1.15%
M04356_3.00:HEY1	GGCACGTGTC	0.01	-5.476	0.0471	6	10.71%	340.5	2.71%
M04744_3.00:KLF13:KLF9	GGGGGGCGTGGCN	0.01	-5.455	0.0481	4	7.14%	145.7	1.16%
M06253_3.00:FOXP1:FOXP2:FOXP3:FOXP4	WNTTGTTTAC	0.01	-5.452	0.0481	10	17.86%	853.6	6.80%
M10969_3.00:MYCN	NKRCACGTGGKR	0.01	-5.448	0.0483	6	10.71%	342	2.73%
M08864_3.00:GATA1:GATA2:GATA3:GATA4:GATA5:GATA6	AGATAAG	0.01	-5.436	0.0488	10	17.86%	855.3	6.82%
M09960_3.00:JUN:JUNB:JUND	RTGACTCABY	0.01	-5.434	0.0488	6	10.71%	343.2	2.73%
M04542_3.00:FOS:FOSB:FOSL1:FOSL2	CGTGTCATT	0.01	-5.42	0.0494	6	10.71%	344.4	2.74%
M06124_3.00:RLF	AARCGGCNNNNN	0.01	-5.41	0.0498	16	28.57%	1800	14.34%
M05934_3.00:RFX5:RFX7	CGTTGCTAB	0.01	-5.403	0.0501	10	17.86%	859.5	6.85%
M09993_3.00:MAZ	GGGGGAGGGGGDGGGRGRGGRG	0.01	-5.392	0.0505	6	10.71%	346.8	2.76%
M10111_3.00:MAZ	GGGGGAGGGGGDGGGRGRGGRG	0.01	-5.392	0.0505	6	10.71%	346.8	2.76%
M00170_3.00:ARID3A:ARID3B:ARID3C	DTTTRATHN	0.01	-5.381	0.0511	24	42.86%	3261.2	25.99%
M04293_3.00:MITF:TFEB	NGTCACATGNT	0.01	-5.378	0.0511	6	10.71%	347.5	2.77%
M00420_3.00:POU3F4	TGMATAH	0.01	-5.368	0.0516	38	67.86%	6236.6	49.70%
M04946_3.00:EHF:ELF1:ELF2:ELF3:ELF4:ELF5:ELK1:ELK3:ELK4:ERF:ERG:ETS1:ETS2:ETV1:ETV2:ETV3:ETV3L:ETV4:ETV5:ETV6:ETV7:FEV:FLI1:GABPA:SPDEF	AAVCAGGAAGTR	0.01	-5.365	0.0516	6	10.71%	348.6	2.78%
M12651_3.00:BNC1:BNC2	TGAGTCA	0.01	-5.365	0.0516	6	10.71%	348.7	2.78%
M03304_3.00:HOXA13:HOXB13:HOXC13:HOXD13	KTTTTATTGG	0.01	-5.351	0.0522	6	10.71%	349.5	2.79%
M04294_3.00:HES1:HES4	GGCRCGTGBC	0.01	-5.351	0.0522	6	10.71%	349.4	2.78%
M02530_3.00:RFX1:RFX2:RFX3:RFX4:RFX6	GTTGCCADGS	0.01	-5.346	0.0524	18	32.14%	2157.7	17.19%
M02175_3.00:ZHX1	HYACKBNN	0.01	-5.326	0.0534	30	53.57%	4485.8	35.75%
M11362_3.00:ZNF148	GNGGGGGMGGGG	0.01	-5.315	0.0539	10	17.86%	870.5	6.94%
M12321_3.00:TP53	RGRCATGTCT	0.01	-5.311	0.054	12	21.43%	1168.8	9.31%
M05650_3.00:POU2F2	VATTWGCATAH	0.01	-5.31	0.054	6	10.71%	352.8	2.81%
M08707_3.00:MAFF	GTCAGCATTTT	0.01	-5.292	0.0549	4	7.14%	152.6	1.22%
M01562_3.00:ELF5:ETV7:SPI1:SPIB:SPIC	WDVVGGAAG	0.01	-5.285	0.0552	38	67.86%	6260.2	49.89%
M11080_3.00:ATF1:CREB1:CREM	GTGACGTVA	0.01	-5.285	0.0552	16	28.57%	1822.2	14.52%
M10184_3.00:EHF:ELF1:ELF2:ELF4:ELK1:ELK3:ELK4:ERF:ERG:ETS1:ETS2:ETV1:ETV2:ETV3:ETV3L:ETV4:ETV5:FEV:FLI1:GABPA	GCVGGAAGYG	0.01	-5.281	0.0552	20	35.71%	2530.1	20.16%
M10205_3.00:EHF:ELF1:ELF2:ELF4:ELK1:ELK3:ELK4:ERF:ERG:ETS1:ETS2:ETV1:ETV2:ETV3:ETV3L:ETV4:ETV5:FEV:FLI1:GABPA	GCVGGAAGYG	0.01	-5.281	0.0552	20	35.71%	2530.1	20.16%
M01740_3.00:ARID3A:ARID3B:ARID3C	NTTTDATHN	0.01	-5.277	0.0554	24	42.86%	3286.6	26.19%
M04434_3.00:ATF1:CREB1:CREM	BRTGACATCACN	0.01	-5.27	0.0557	6	10.71%	355.2	2.83%
M00278_3.00:KLF1	GGGGBNNNN	0.01	-5.267	0.0558	56	100.00%	11420.7	91.01%
M08753_3.00:ZNF189	GGAACAGCA	0.01	-5.257	0.0563	6	10.71%	356.8	2.84%
M09918_3.00:FOS:FOSB:FOSL1:FOSL2	RTGAGTCAB	0.01	-5.243	0.057	10	17.86%	879.3	7.01%
M04354_3.00:HAND2	YGCAGGTGTT	0.01	-5.243	0.057	8	14.29%	603.4	4.81%
M05423_3.00:ALX1:ALX3:ALX4:ARX:BARX1:BARX2:BSX:DLX1:DLX2:DLX3:DLX4:DLX5:DLX6:DRGX:EMX1:EMX2:EN1:EN2:ESX1:EVX1:EVX2:GBX1:GBX2:GSX1:GSX2:HESX1:HMX1:HMX3:HOXA1:HOXA2:HOXA3:HOXA4:HOXA5:HOXB1:HOXB2:HOXB3:HOXB4:HOXB5:HOXC4:HOXC5:HOXD1:HOXD3:HOXD4:ISX:LHX2:LHX3:LHX4:LHX6:LHX8:LHX9:LMX1A:LMX1B:MEOX1:MIXL1:MNX1:MSX1:MSX2:NKX1-1:NKX1-2:NOBOX:NOTO:OTP:PDX1:PHOX2A:PHOX2B:PROP1:PRRX1:PRRX2:RAX:RAX2:SEBOX:SHOX…	NTAAYGAB	0.01	-5.237	0.0572	16	28.57%	1831.1	14.59%
M10650_3.00:EBF1:EBF2:EBF3:EBF4	TCCCYRGGGACH	0.01	-5.23	0.0575	6	10.71%	358.8	2.86%
M10598_3.00:MITF:TFE3:TFEB:TFEC	GTCACATGAY	0.01	-5.217	0.0582	6	10.71%	359.6	2.87%
M03964_3.00:GATA1:GATA2:GATA3:GATA4:GATA5:GATA6	SWGATAASG	0.01	-5.212	0.0585	10	17.86%	883.5	7.04%
M03761_3.00:TBX2:TBX3:TBX4:TBX5	WAGGTGTGAAA	0.01	-5.203	0.0589	4	7.14%	156.2	1.25%
M01578_3.00:ELF1:ELF2:ELF4:ELK1:ELK3:ELK4:ERF:ERG:ETS1:ETS2:ETV1:ETV2:ETV3:ETV3L:ETV4:ETV5:FEV:FLI1:GABPA	NASCGGAART	0.01	-5.199	0.059	16	28.57%	1838.9	14.65%
M09945_3.00:DDIT3	ATTKCATCAK	0.01	-5.191	0.0595	6	10.71%	362	2.88%
M05496_3.00:ALX1:ALX3:ALX4:ARX:BARHL1:BARHL2:BARX1:BARX2:BSX:DLX1:DLX2:DLX3:DLX4:DLX5:DLX6:DRGX:EMX1:EMX2:EN1:EN2:ESX1:EVX1:EVX2:GBX1:GBX2:GSX1:GSX2:HESX1:HOXA1:HOXA2:HOXA3:HOXA4:HOXA5:HOXB1:HOXB2:HOXB3:HOXB4:HOXB5:HOXC4:HOXC5:HOXD1:HOXD3:HOXD4:ISX:LHX1:LHX3:LHX4:LHX5:MEOX1:MEOX2:MIXL1:MNX1:MSX1:MSX2:NANOG:NANOGP8:NKX1-1:NKX1-2:NOTO:OTP:PDX1:PHOX2A:PHOX2B:PROP1:PRRX1:PRRX2:RAX:RAX2:SEBOX:SHOX:SHO…	STAATTAS	0.01	-5.189	0.0595	16	28.57%	1840.5	14.67%
M10154_3.00:E2F1:E2F2:E2F3:E2F4:E2F5:E2F6	WDGGCGGGAAA	0.01	-5.185	0.0597	8	14.29%	609.3	4.85%
M03940_3.00:FOXC1:FOXC2:FOXD1:FOXD2:FOXD3:FOXD4:FOXD4L1:FOXD4L3:FOXD4L4:FOXD4L5:FOXD4L6:FOXE1:FOXG1:FOXI1:FOXI2:FOXI3:FOXJ3:FOXK2:FOXL1:FOXL2:FOXS1	TTTGTTTAYATW	0.01	-5.181	0.0598	4	7.14%	157.5	1.26%
M04188_3.00:T:TBX19	AGGTGTGAAAT	0.01	-5.181	0.0598	4	7.14%	157	1.25%
M08026_3.00:ZNF235	AAAAAAAAAAAAAAAARATRAAAAAAAWDA	0.01	-5.159	0.061	4	7.14%	158.3	1.26%
M01815_3.00:CCDC169-SOHLH2:SOHLH2	NGCACGKRCN	0.01	-5.157	0.0611	12	21.43%	1191.2	9.49%
M04468_3.00:ATF1:CREB1:CREM	NRTGACGTCAYN	0.01	-5.152	0.0613	6	10.71%	364.4	2.90%
M11609_3.00:EHF:ELF1:ELF2:ELF3:ELF4:ELF5:ELK1:ELK3:ELK4:ERF:ERG:ETS1:ETS2:ETV1:ETV2:ETV3:ETV3L:ETV4:ETV5:ETV6:ETV7:FEV:FLI1:GABPA:SPDEF	AGGAAG	0.01	-5.141	0.0619	28	50.00%	4120.4	32.83%
M08192_3.00:ZNF674	GGAGCACCAVAV	0.01	-5.113	0.0635	6	10.71%	367.6	2.93%
M00309_3.00:FOXC1:FOXC2:FOXD1:FOXD2:FOXD3:FOXD4:FOXD4L1:FOXD4L3:FOXD4L4:FOXD4L5:FOXD4L6:FOXE1:FOXF1:FOXF2:FOXG1:FOXI1:FOXI3:FOXK2:FOXL1:FOXL2:FOXS1	NNTGTTTATT	0.01	-5.111	0.0636	10	17.86%	896.8	7.15%
M04702_3.00:ZBTB7B	NGGTGGTCGH	0.01	-5.104	0.064	10	17.86%	897.2	7.15%
M03295_3.00:RHOXF1	GGATWATCC	0.01	-5.101	0.0641	6	10.71%	368.7	2.94%
M11632_3.00:ELF1:ELF2:ELF4:ELK1:ELK3:ELK4:ERF:ERG:ETS1:ETS2:ETV1:ETV2:ETV3:ETV3L:ETV4:ETV5:FEV:FLI1:GABPA	MGVSRGGAAG	0.01	-5.098	0.0642	24	42.86%	3330.4	26.54%
M11213_3.00:ZEB1:ZEB2	WHWCACCTGTHC	0.01	-5.096	0.0643	10	17.86%	898.3	7.16%
M05503_3.00:ALX1:ALX3:ALX4:ARX:BARX1:BARX2:BSX:DLX1:DLX2:DLX3:DLX4:DLX5:DLX6:DRGX:EMX1:EMX2:EN1:EN2:ESX1:EVX1:EVX2:GBX1:GBX2:GSX1:GSX2:HESX1:HOXA1:HOXA2:HOXA3:HOXB1:HOXB2:HOXB3:HOXD3:ISX:LBX1:LBX2:LHX1:LHX2:LHX3:LHX4:LHX5:LHX6:LHX8:LHX9:LMX1A:LMX1B:MEOX1:MIXL1:MNX1:MSX1:MSX2:NKX1-1:NKX1-2:NOBOX:NOTO:OTP:PDX1:PHOX2A:PHOX2B:PROP1:PRRX1:PRRX2:RAX:RAX2:SEBOX:SHOX:SHOX2:UNCX:VAX1:VAX2:VSX1:VSX2:ZFHX2:…	TAATTRSATTA	0.01	-5.095	0.0643	4	7.14%	161.8	1.29%
M11656_3.00:FOXM1	AAATAAACA	0.01	-5.091	0.0644	14	25.00%	1522.3	12.13%
M08137_3.00:ZNF398	AGGGAGGGARRGAG	0.01	-5.088	0.0645	6	10.71%	369.7	2.95%
M10618_3.00:BATF:BATF3	DATGASTCAT	0.01	-5.088	0.0645	6	10.71%	369.4	2.94%
M12458_3.00:SOX1:SOX10:SOX11:SOX12:SOX13:SOX14:SOX15:SOX17:SOX18:SOX2:SOX21:SOX3:SOX30:SOX4:SOX5:SOX6:SOX7:SOX8:SOX9:SRY	CAAWGBB	0.01	-5.084	0.0646	34	60.71%	5414.8	43.15%
M05491_3.00:SIX1:SIX2:SIX4:SIX5	MCGTATCRYY	0.01	-5.075	0.0651	6	10.71%	370.9	2.96%
M09907_3.00:ATF1:CREB1:CREM	TGACGTCABYG	0.01	-5.05	0.0665	6	10.71%	372.4	2.97%
M09968_3.00:ATF1:CREB1:CREM	TGACGTCABYG	0.01	-5.05	0.0665	6	10.71%	372.4	2.97%
M10655_3.00:ELF1:ELF2:ELF4:ELK1:ELK3:ELK4:ERF:ERG:ETS1:ETS2:ETV1:ETV2:ETV3:ETV3L:ETV4:ETV5:FEV:FLI1:GABPA	ACAGGAAGTG	0.01	-5.05	0.0665	6	10.71%	372.2	2.97%
M06641_3.00:PBX1:PBX2:PBX3:PBX4	TTTGAYAW	0.01	-5.038	0.0673	44	78.57%	7786.7	62.05%
M04682_3.00:OSR1:OSR2	TGCTACTGTD	0.01	-5.037	0.0673	6	10.71%	373.4	2.98%
M10556_3.00:TBP:TBPL2	CTATAAAARS	0.01	-5.037	0.0673	6	10.71%	373.9	2.98%
M11273_3.00:KLF1:KLF12:KLF2:KLF3:KLF4:KLF5:KLF6:KLF7:KLF8	GCAGGGGGYGGGGCSG	0.01	-5.037	0.0673	6	10.71%	373.8	2.98%
M10282_3.00:MEIS1:MEIS2:MEIS3:PKNOX1:PKNOX2:TGIF1:TGIF2:TGIF2LX:TGIF2LY	SCTGTCA	0.01	-5.032	0.0673	30	53.57%	4566.3	36.39%
M01811_3.00:BHLHE22:BHLHE23	RCCATATGYT	0.01	-5.025	0.0677	6	10.71%	374	2.98%
M00219_3.00:FOXC1:FOXC2:FOXD1:FOXD2:FOXD3:FOXD4:FOXD4L1:FOXD4L3:FOXD4L4:FOXD4L5:FOXD4L6:FOXE1:FOXE3:FOXF1:FOXF2:FOXG1:FOXI1:FOXI3:FOXL1:FOXL2:FOXS1	TGTTTAYWHW	0.01	-5.005	0.069	14	25.00%	1537.5	12.25%
M05479_3.00:BARX1:BARX2:BSX:EMX1:EMX2:EN1:EN2:EVX1:EVX2:GBX1:GBX2:GSX1:GSX2:HMX1:HMX2:HMX3:HOXA1:HOXA2:HOXA3:HOXA4:HOXA5:HOXA6:HOXA7:HOXB1:HOXB2:HOXB3:HOXB4:HOXB5:HOXB6:HOXB7:HOXB8:HOXC4:HOXC5:HOXC6:HOXD1:HOXD3:HOXD4:HOXD8:ISX:MEOX1:MEOX2:MNX1:NKX1-1:NKX1-2:NOTO:OTP:PDX1:TLX2:VAX1:VAX2:VENTX	HTAAYGAY	0.01	-5.005	0.069	10	17.86%	910.7	7.26%
M05478_3.00:BARX1:BARX2:BSX:EMX1:EMX2:EN1:EN2:EVX1:EVX2:GBX1:GBX2:GSX1:GSX2:HMX1:HMX2:HMX3:HOXA1:HOXA2:HOXA3:HOXA4:HOXA5:HOXA6:HOXA7:HOXB1:HOXB2:HOXB3:HOXB4:HOXB5:HOXB6:HOXB7:HOXB8:HOXC4:HOXC5:HOXC6:HOXD1:HOXD3:HOXD4:HOXD8:ISX:MEOX1:MEOX2:MNX1:NKX1-1:NKX1-2:NOTO:OTP:PDX1:TLX2:VAX1:VAX2:VENTX	STAATKRV	0.01	-5.001	0.0691	26	46.43%	3751.9	29.90%
M02174_3.00:HOXA13:HOXB13:HOXC13:HOXD13	WTTTATDRGN	0.01	-4.991	0.0697	18	32.14%	2230.9	17.78%
M11363_3.00:ZNF148	TGGGGGAGGR	0.01	-4.991	0.0697	16	28.57%	1878.6	14.97%
M08880_3.00:MEIS1:MEIS2:MEIS3:PKNOX1:PKNOX2:TGIF1:TGIF2	CATAAATCA	0.01	-4.991	0.0697	4	7.14%	166.4	1.33%
M01082_3.00:JUN:JUNB:JUND	NATGACTCAY	0.01	-4.987	0.0697	6	10.71%	377.5	3.01%
M09926_3.00:JUN:JUNB:JUND	DVTGAGTCABH	0.01	-4.987	0.0697	6	10.71%	377.9	3.01%
M06125_3.00:ZNF831	NHNSGRGAWTCC	0.01	-4.977	0.0703	14	25.00%	1542.8	12.29%
M03785_3.00:CPEB1	AATAAAAA	0.01	-4.975	0.0703	10	17.86%	914.9	7.29%
M11541_3.00:ONECUT1:ONECUT2:ONECUT3	TATTGATT	0.01	-4.975	0.0703	6	10.71%	378.7	3.02%
M01888_3.00:ATF1:CREB1:CREM	NBACGTCAY	0.01	-4.971	0.0704	28	50.00%	4166.7	33.20%
M09433_3.00:KLF1:KLF12:KLF2:KLF3:KLF4:KLF5:KLF6:KLF7	DGGGCGGGGCC	0.01	-4.96	0.0711	10	17.86%	916.1	7.30%
M04427_3.00:OLIG2:OLIG3	AACAGCTGTT	0.01	-4.95	0.0718	4	7.14%	168.7	1.34%
M09885_3.00:TCF12:TCF3:TCF4	RGCAGGTGGG	0.01	-4.939	0.0724	18	32.14%	2241.7	17.86%
M03432_3.00:HOXA10:HOXA11:HOXA6:HOXA9:HOXB6:HOXB8:HOXB9:HOXC10:HOXC11:HOXC12:HOXC6:HOXC8:HOXC9:HOXD10:HOXD11:HOXD12:HOXD8:HOXD9	TTTTTATGGS	0.01	-4.938	0.0724	10	17.86%	919.8	7.33%
M10672_3.00:GATA1:GATA2:GATA3:GATA4:GATA5:GATA6	SAGATAAGRV	0.01	-4.938	0.0724	6	10.71%	381.9	3.04%
M10980_3.00:ASCL1:ASCL2	YMMCACCTGCY	0.01	-4.93	0.0729	4	7.14%	169.9	1.35%
M11676_3.00:FOXO1:FOXO3:FOXO4:FOXO6	VWAAACAA	0.01	-4.914	0.0739	20	35.71%	2612.5	20.82%
M04462_3.00:ATF1:CREB1:CREM	SRTGACGTCACS	0.01	-4.914	0.0739	6	10.71%	383.2	3.05%
M12011_3.00:IRF4:IRF8	KAAAMWGAAAVYA	0.01	-4.914	0.0739	6	10.71%	383.3	3.05%
M10200_3.00:EHF:ELF1:ELF2:ELF3:ELF4:ELF5:ETV6:ETV7	RCAGGAARK	0.01	-4.91	0.074	22	39.29%	2990.1	23.83%
M04337_3.00:HEY1:HEY2:HEYL	GGCACGTGYC	0.01	-4.902	0.0743	6	10.71%	384.9	3.07%
M06116_3.00:USF3	NVYCACGTGGKN	0.01	-4.902	0.0743	6	10.71%	384.4	3.06%
M10580_3.00:MYC	VCCACGTG	0.01	-4.902	0.0743	6	10.71%	384.5	3.06%
M03962_3.00:GATA1:GATA2:GATA3:GATA4:GATA5:GATA6	VWGATAAGR	0.01	-4.901	0.0743	10	17.86%	924.3	7.37%
M04283_3.00:MITF:TFEC	RGTCACATGDT	0.01	-4.89	0.0751	6	10.71%	385.8	3.07%
M12006_3.00:IRF3	AAAGSGAAAVKVA	0.01	-4.878	0.0759	6	10.71%	386.8	3.08%
M03269_3.00:GATA1:GATA2:GATA3:GATA4:GATA5:GATA6	WGATAASR	0.01	-4.874	0.0761	16	28.57%	1901.4	15.15%
M03395_3.00:ALX1:ALX3:ALX4:ARX:BARHL1:BARHL2:BARX1:BARX2:BSX:DLX1:DLX2:DLX3:DLX4:DLX5:DLX6:DRGX:EMX1:EMX2:EN1:EN2:ESX1:EVX1:EVX2:GBX1:GBX2:GSX1:GSX2:HESX1:HOXA1:HOXA2:HOXA3:HOXB1:HOXB2:HOXB3:HOXD3:ISX:LBX1:LBX2:LHX1:LHX2:LHX3:LHX4:LHX5:LHX6:LHX8:LHX9:LMX1A:LMX1B:MEOX1:MIXL1:MNX1:MSX1:MSX2:NKX1-1:NKX1-2:NOBOX:NOTO:OTP:PDX1:PHOX2A:PHOX2B:PROP1:PRRX1:PRRX2:RAX:RAX2:SEBOX:SHOX:SHOX2:UNCX:VAX1:VAX2:VS…	NTAATTTAATTAN	0.01	-4.87	0.0763	4	7.14%	172.1	1.37%
M05387_3.00:CRX:DLX1:DLX2:DLX4:DLX5:EMX1:LHX2:LHX9:PITX1:PITX2:VAX1:VSX1	STAATTRV	0.01	-4.858	0.0771	20	35.71%	2625.8	20.92%
M01195_3.00:CCDC169-SOHLH2:SOHLH2	GCACGTGCN	0.01	-4.856	0.0772	12	21.43%	1238.6	9.87%
M04355_3.00:HAND2	YGCAGGTGTT	0.01	-4.852	0.0774	8	14.29%	645.5	5.14%
M00315_3.00:ALX1:ALX3:ALX4:ARX:BARHL1:BARHL2:BARX1:BARX2:BSX:DLX1:DLX2:DLX3:DLX4:DLX5:DLX6:DRGX:EMX1:EMX2:EN1:EN2:ESX1:EVX1:EVX2:GBX1:GBX2:GSX1:GSX2:HESX1:HOXA2:HOXA3:HOXB2:HOXB3:HOXD3:ISX:LBX1:LBX2:LHX1:LHX2:LHX3:LHX4:LHX5:LHX6:LHX8:LHX9:LMX1A:LMX1B:MEOX1:MIXL1:MNX1:MSX1:MSX2:NKX1-1:NKX1-2:NOBOX:NOTO:OTP:PDX1:PHOX2A:PHOX2B:PROP1:PRRX1:PRRX2:RAX:RAX2:SEBOX:SHOX:SHOX2:UNCX:VAX1:VAX2:VSX1:VSX2:ZFHX…	NAYTAATTAKM	0.01	-4.851	0.0774	4	7.14%	173.9	1.39%
M03751_3.00:EOMES:TBR1:TBX21	RAGGTGTGAA	0.01	-4.851	0.0774	4	7.14%	173.7	1.38%
M00677_3.00:EGR1:EGR2:EGR3:EGR4	CGTGGGCG	0.01	-4.825	0.0792	12	21.43%	1243.8	9.91%
M12464_3.00:SOX1:SOX10:SOX13:SOX14:SOX15:SOX17:SOX18:SOX2:SOX21:SOX3:SOX5:SOX6:SOX7:SOX8:SOX9:SRY	AAACAATRGA	0.01	-4.818	0.0797	6	10.71%	391.6	3.12%
M08662_3.00:NEUROG2:NEUROG3	CAGATGG	0.01	-4.81	0.0802	14	25.00%	1572.1	12.53%
M04883_3.00:CUX1:CUX2	NTATCGATYR	0.01	-4.806	0.0805	6	10.71%	392.6	3.13%
M05672_3.00:POU2F3	NATTWGCATAH	0.01	-4.794	0.0813	6	10.71%	394	3.14%
M06025_3.00:TBX1:TBX10	KDAGGTGTGAAR	0.01	-4.793	0.0814	4	7.14%	176.7	1.41%
M00518_3.00:HDX	RVRATCA	0.01	-4.784	0.082	48	85.71%	8912.5	71.02%
M00439_3.00:ALX1:ALX3:ALX4:ARX:BARHL1:BARHL2:BARX1:BARX2:BSX:DLX1:DLX2:DLX3:DLX4:DLX5:DLX6:DRGX:EMX1:EMX2:EN1:EN2:ESX1:EVX1:EVX2:GBX1:GBX2:GSX1:GSX2:HMX1:HMX2:HMX3:HOXA1:HOXA2:HOXA3:HOXA4:HOXA5:HOXB1:HOXB2:HOXB3:HOXB4:HOXB5:HOXC12:HOXC4:HOXC5:HOXD1:HOXD3:HOXD4:ISX:LBX1:LBX2:LHX1:LHX5:MEOX1:MEOX2:MIXL1:MNX1:MSX1:MSX2:NANOG:NANOGP8:NKX1-1:NKX1-2:OTP:PDX1:PHOX2A:PHOX2B:PROP1:PRRX1:PRRX2:RAX:RAX2:SEB…	NTAATKABN	0.01	-4.781	0.0821	20	35.71%	2643.5	21.07%
M11705_3.00:GATA1:GATA2:GATA3:GATA4:GATA5:GATA6	MYAGATAAGA	0.01	-4.748	0.0848	6	10.71%	397.4	3.17%
M05489_3.00:SIX1:SIX2:SIX4:SIX5	CCGTATCRYN	0.01	-4.736	0.0857	6	10.71%	398.9	3.18%
M04803_3.00:ZBTB20	NCTATACRTTRM	0.01	-4.736	0.0857	4	7.14%	179.5	1.43%
M05552_3.00:NKX2-1:NKX2-2:NKX2-3:NKX2-4:NKX2-5:NKX2-6:NKX2-8	CTCAACGAS	0.01	-4.736	0.0857	4	7.14%	179.5	1.43%
M11347_3.00:PRDM16	GATGAG	0.01	-4.73	0.0859	26	46.43%	3824.8	30.48%
M01903_3.00:ATF1:CREB1:CREM	TTACGTCATM	0.01	-4.725	0.0862	6	10.71%	399.3	3.18%
M06224_3.00:JUN:JUNB:JUND	GATKACGTCAT	0.01	-4.725	0.0862	6	10.71%	399.7	3.18%
M08437_3.00:BORCS8-MEF2B:MEF2A:MEF2B:MEF2C:MEF2D	DKCTATTTTTRGMHH	0.01	-4.698	0.0883	4	7.14%	181.1	1.44%
M10747_3.00:PAX1:PAX2:PAX3:PAX5:PAX6:PAX7:PAX8:PAX9	GTCATGCHTGRCTGS	0.01	-4.698	0.0883	4	7.14%	181.1	1.44%
M04484_3.00:MAF:MAFA:MAFB:NRL	HGTCAGCANWTTT	0.01	-4.68	0.0897	4	7.14%	182.6	1.45%
M05356_3.00:NKX2-1:NKX2-2:NKX2-3:NKX2-4:NKX2-5:NKX2-6:NKX2-8	BTCAACGAS	0.01	-4.68	0.0897	4	7.14%	182.6	1.45%
M09458_3.00:KLF15	GGGGCGGRGCVGGGG	0.01	-4.679	0.0897	6	10.71%	403.2	3.21%
M10270_3.00:ALX1:ALX3:ALX4:ARX:BARHL1:BARHL2:BARX1:BARX2:BSX:DLX1:DLX2:DLX3:DLX4:DLX5:DLX6:DRGX:EMX1:EMX2:EN1:EN2:ESX1:EVX1:EVX2:GBX1:GBX2:GSX1:GSX2:HMX1:HMX2:HMX3:HOXA1:HOXA2:HOXA3:HOXA4:HOXA5:HOXA6:HOXA7:HOXB1:HOXB2:HOXB3:HOXB4:HOXB5:HOXB6:HOXB7:HOXB8:HOXC4:HOXC5:HOXC6:HOXD1:HOXD3:HOXD4:HOXD8:ISX:LHX3:LHX4:MEOX1:MEOX2:MIXL1:MNX1:MSX1:MSX2:NANOG:NANOGP8:NKX1-1:NKX1-2:NOBOX:NOTO:OTP:PDX1:PHOX2A:P…	CATCAATCA	0.01	-4.679	0.0897	6	10.71%	404	3.22%
M04496_3.00:ATF3:JDP2	NRTGACRTCAYN	0.01	-4.668	0.0904	6	10.71%	404.2	3.22%
M10724_3.00:MYB:MYBL1	GGCVGTTR	0.01	-4.668	0.0904	6	10.71%	405	3.23%
M08563_3.00:ZNF512B	RRARGGARGGAARGAARGAAR	0.01	-4.662	0.0908	4	7.14%	183.2	1.46%
M10140_3.00:ZFX:ZFY	SVGSGSCSCAGGCCBSGGC	0.01	-4.662	0.0908	4	7.14%	183.8	1.46%
M01009_3.00:MAX	GCACGTGG	0.01	-4.649	0.0918	12	21.43%	1272.1	10.14%
M05176_3.00:BARX1:BARX2:BSX:EMX1:EMX2:EN1:EN2:EVX1:EVX2:GBX1:GBX2:GSX1:GSX2:HMX1:HMX2:HMX3:HOXA1:HOXA2:HOXA3:HOXA4:HOXA5:HOXA6:HOXA7:HOXA9:HOXB1:HOXB2:HOXB3:HOXB4:HOXB5:HOXB6:HOXB7:HOXB8:HOXB9:HOXC4:HOXC5:HOXC6:HOXC8:HOXC9:HOXD1:HOXD3:HOXD4:HOXD8:HOXD9:ISX:MEOX1:MEOX2:MNX1:NKX1-1:NKX1-2:NOTO:OTP:PDX1:VAX1:VAX2:VENTX	STAATKAC	0.01	-4.642	0.0923	20	35.71%	2677	21.33%
M03270_3.00:GATA1:GATA2:GATA3:GATA4:GATA5:GATA6	AGATAASR	0.01	-4.624	0.0939	16	28.57%	1952.6	15.56%
M11584_3.00:EBF1:EBF2:EBF3:EBF4	KTCCCTTGGGA	0.01	-4.622	0.0939	6	10.71%	408.6	3.26%
M01804_3.00:HEY1:HEY2:HEYL	GACACGTGC	0.01	-4.611	0.0949	6	10.71%	409.9	3.27%
M04358_3.00:HEY1	GGCACGTGYC	0.1	-4.6	0.0958	6	10.71%	410.8	3.27%
M05594_3.00:ALX1:ALX3:ALX4:ARX:DRGX:EMX1:EMX2:EN1:EN2:ESX1:GBX1:GBX2:GSX1:GSX2:HOXA2:HOXA3:HOXA4:HOXA5:HOXB2:HOXB3:HOXB4:HOXB5:HOXC4:HOXC5:HOXD3:HOXD4:ISL1:ISL2:ISX:LHX2:LHX3:LHX4:LHX9:MIXL1:MNX1:NKX1-1:NKX1-2:NOTO:OTP:PDX1:PHOX2A:PHOX2B:PROP1:PRRX1:PRRX2:RAX:RAX2:SEBOX:SHOX:SHOX2:UNCX:VAX1:VAX2:VSX1:VSX2	CTAATTRG	0.1	-4.596	0.0961	14	25.00%	1612.9	12.85%
M00231_3.00:IRF5:IRF6	NRNCGAWACY	0.1	-4.589	0.0967	20	35.71%	2689.3	21.43%
M00312_3.00:FOXC1:FOXC2:FOXD1:FOXD2:FOXD3:FOXD4:FOXD4L1:FOXD4L3:FOXD4L4:FOXD4L5:FOXD4L6:FOXE1:FOXF1:FOXF2:FOXG1:FOXI1:FOXI3:FOXK2:FOXL1:FOXL2:FOXP4:FOXS1	TGTTTWYNYW	0.1	-4.583	0.0972	30	53.57%	4696.6	37.43%
M00862_3.00:FOXC1:FOXC2:FOXD1:FOXD2:FOXD3:FOXD4:FOXD4L1:FOXD4L3:FOXD4L4:FOXD4L5:FOXD4L6:FOXE1:FOXG1:FOXI1:FOXI2:FOXI3:FOXJ3:FOXK2:FOXL1:FOXL2:FOXS1	NTGTTTAYNN	0.1	-4.582	0.0972	22	39.29%	3072	24.48%
M00198_3.00:ZNF740	NNTGGGGGGG	0.1	-4.581	0.0972	18	32.14%	2320	18.49%
M09915_3.00:ATF1:CREB1:CREM	TGACGTCACYK	0.1	-4.578	0.0973	6	10.71%	412.8	3.29%
M11605_3.00:ELF1:ELF2:ELF4:ELK1:ELK3:ELK4:ERF:ERG:ETS1:ETS2:ETV1:ETV2:ETV3:ETV3L:ETV4:ETV5:FEV:FLI1:GABPA	MCMGGAAGTG	0.1	-4.567	0.0983	6	10.71%	413.4	3.29%
M08738_3.00:ZNF175	ACAGGAAGT	0.1	-4.556	0.0993	6	10.71%	414	3.30%
M08145_3.00:ZNF695	RGAGGAA	0.1	-4.549	0.0999	12	21.43%	1289.5	10.28%
M02011_3.00:DMRT1:DMRT2:DMRT3:DMRTA2:DMRTB1:DMRTC2	TTGATACA	0.1	-4.545	0.1002	6	10.71%	415.3	3.31%
M11614_3.00:ELF1:ELF2:ELF4:ELK1:ELK3:ELK4:ERF:ERG:ETS1:ETS2:ETV1:ETV2:ETV3:ETV3L:ETV4:ETV5:FEV:FLI1:GABPA	CAGGAAG	0.1	-4.542	0.1004	34	60.71%	5578.4	44.45%
M11629_3.00:ELF1:ELF2:ELF4:ELK1:ELK3:ELK4:ERF:ERG:ETS1:ETS2:ETV1:ETV2:ETV3:ETV3L:ETV4:ETV5:FEV:FLI1:GABPA	MGGAAG	0.1	-4.541	0.1004	28	50.00%	4288.3	34.17%
M11653_3.00:FOXC1:FOXC2:FOXD1:FOXD2:FOXD3:FOXD4:FOXD4L1:FOXD4L3:FOXD4L4:FOXD4L5:FOXD4L6:FOXE1:FOXE3:FOXF1:FOXF2:FOXI1:FOXL1:FOXL2:FOXS1	YAWATAAACAAHB	0.1	-4.519	0.1025	4	7.14%	191.7	1.53%
M09905_3.00:NFE2:NFE2L1:NFE2L2:NFE2L3	AGTCATN	0.1	-4.51	0.1031	28	50.00%	4297.1	34.24%
M09954_3.00:NFE2:NFE2L1:NFE2L2:NFE2L3	AGTCATN	0.1	-4.51	0.1031	28	50.00%	4297.1	34.24%
M02192_3.00:PBX1:PBX2:PBX3:PBX4	TTGATGWG	0.1	-4.504	0.1037	42	75.00%	7454.8	59.40%
M05823_3.00:NR1I2:NR1I3:VDR	AAAGTTCAT	0.1	-4.501	0.1038	6	10.71%	419.2	3.34%
M04804_3.00:ZBTB20	BMTATACRTTRA	0.1	-4.501	0.1038	4	7.14%	193	1.54%
M05273_3.00:HOXA3:HOXA4:HOXA5:HOXA6:HOXA7:HOXA9:HOXB3:HOXB4:HOXB5:HOXB6:HOXB7:HOXB8:HOXB9:HOXC4:HOXC5:HOXC6:HOXC8:HOXC9:HOXD3:HOXD4:HOXD8:HOXD9:PDX1	GTAATKRC	0.1	-4.498	0.104	14	25.00%	1631.4	13.00%
M04397_3.00:ATOH7	RMCATATGKT	0.1	-4.469	0.1069	6	10.71%	422.1	3.36%
M04823_3.00:ZNF250	GTRGGCCTAG	0.1	-4.462	0.1075	10	17.86%	987.3	7.87%
M08302_3.00:ZNF263	GGGAGGAGGRRGRGG	0.1	-4.458	0.1078	6	10.71%	423.9	3.38%
M03302_3.00:HOXA13:HOXB13:HOXC13:HOXD13	DTTTTATTGG	0.1	-4.448	0.1087	6	10.71%	424.5	3.38%
M09852_3.00:MYC	GCCACGTGCTY	0.1	-4.448	0.1087	6	10.71%	424.1	3.38%
M04332_3.00:MYCN	GGCACGTGKY	0.1	-4.437	0.1097	6	10.71%	425.7	3.39%
M04672_3.00:ZNF740	GTGGGGGGGGCRG	0.1	-4.433	0.1099	4	7.14%	196.7	1.57%
M11135_3.00:MAFF	GTCAGCATTTT	0.1	-4.433	0.1099	4	7.14%	196.4	1.57%
M11625_3.00:ELF1:ELF2:ELF4:ELK1:ELK3:ELK4:ERF:ERG:ETS1:ETS2:ETV1:ETV2:ETV3:ETV3L:ETV4:ETV5:FEV:FLI1:GABPA	MGGAAGT	0.1	-4.431	0.11	30	53.57%	4742.6	37.79%
M00560_3.00:HOXA13:HOXB13:HOXC13:HOXD13	WTTTAYDRSN	0.1	-4.417	0.1114	18	32.14%	2358.3	18.79%
M05595_3.00:ALX1:ALX3:ALX4:ARX:DRGX:EMX1:EMX2:EN1:EN2:ESX1:GBX1:GBX2:GSX1:GSX2:HOXA2:HOXA3:HOXA4:HOXA5:HOXB2:HOXB3:HOXB4:HOXB5:HOXC4:HOXC5:HOXD3:HOXD4:ISL1:ISL2:ISX:LHX2:LHX3:LHX4:LHX9:MIXL1:MNX1:NKX1-1:NKX1-2:NOTO:OTP:PDX1:PHOX2A:PHOX2B:PROP1:PRRX1:PRRX2:RAX:RAX2:SEBOX:SHOX:SHOX2:UNCX:VAX1:VAX2:VSX1:VSX2	CTAATTRV	0.1	-4.414	0.1116	20	35.71%	2732.9	21.78%
M11932_3.00:PAX2	GDGTTTVDB	0.1	-4.414	0.1116	42	75.00%	7483.9	59.64%
M00863_3.00:FOXP1:FOXP2:FOXP3:FOXP4	TTGTTTAC	0.1	-4.409	0.1119	10	17.86%	995.4	7.93%
M12367_3.00:RELA	YGRGAAAAHCM	0.1	-4.406	0.1122	8	14.29%	698.4	5.57%
M11223_3.00:ZNF263	RGGGAGGAG	0.1	-4.404	0.1123	18	32.14%	2361	18.81%
M08743_3.00:KLF13:KLF9	GTGGGTGTGGC	0.1	-4.399	0.1127	4	7.14%	198.2	1.58%
M04335_3.00:HEY1:HEY2:HEYL	GGCACGTGTS	0.1	-4.395	0.1131	6	10.71%	429.5	3.42%
M11970_3.00:POU3F1	HNAYAAWW	0.1	-4.383	0.1144	40	71.43%	7010.6	55.87%
M08480_3.00:ZNF512	AAAGAAAG	0.1	-4.379	0.1147	20	35.71%	2741.2	21.84%
M05346_3.00:ALX1:ALX3:ALX4:ARX:BARHL1:BARHL2:BARX1:BARX2:BSX:DRGX:EMX1:EMX2:EN1:EN2:ESX1:EVX1:EVX2:GBX1:GBX2:GSX1:GSX2:HESX1:HOXA2:HOXA3:HOXB2:HOXB3:HOXD3:ISX:LBX1:LBX2:LHX1:LHX2:LHX3:LHX4:LHX5:LHX6:LHX8:LHX9:LMX1A:LMX1B:MEOX1:MEOX2:MIXL1:MNX1:MSX1:MSX2:NKX1-1:NKX1-2:NOBOX:NOTO:OTP:PDX1:PHOX2A:PHOX2B:PROP1:PRRX1:PRRX2:RAX:RAX2:SEBOX:SHOX:SHOX2:UNCX:VAX1:VAX2:VSX1:VSX2:ZFHX2	YTAATTAN	0.1	-4.375	0.115	8	14.29%	702.2	5.60%
M11807_3.00:SIX1:SIX2:SIX4:SIX5	CTCAGRTTTCH	0.1	-4.374	0.115	6	10.71%	431.8	3.44%
M00335_3.00:ALX1:ALX3:ALX4:ARX:BARX1:BARX2:BSX:DLX1:DLX2:DLX3:DLX6:DRGX:EMX1:EMX2:EN1:EN2:ESX1:EVX1:EVX2:GBX1:GBX2:GSX1:GSX2:HESX1:HOXA2:HOXA3:HOXB2:HOXB3:HOXD3:ISX:LBX1:LBX2:LHX1:LHX2:LHX3:LHX4:LHX5:LHX6:LHX8:LHX9:LMX1A:LMX1B:MEOX1:MIXL1:MNX1:MSX1:MSX2:NKX1-1:NKX1-2:NOBOX:NOTO:OTP:PDX1:PHOX2A:PHOX2B:PROP1:PRRX1:PRRX2:RAX:RAX2:SEBOX:SHOX:SHOX2:UNCX:VAX1:VAX2:VSX1:VSX2:ZFHX2:ZFHX3	NTMCATAATTAMN	0.1	-4.366	0.1156	4	7.14%	200.3	1.60%
M12360_3.00:RELA	GGAAATTCCC	0.1	-4.366	0.1156	4	7.14%	200.5	1.60%
M02538_3.00:RFX1:RFX2:RFX3:RFX4:RFX6	GTTGCYANGN	0.1	-4.354	0.117	18	32.14%	2373.9	18.92%
M12477_3.00:STAT1	TTCYGGGAAA	0.1	-4.353	0.117	6	10.71%	433.1	3.45%
M03219_3.00:FOXC1:FOXC2:FOXD1:FOXD2:FOXD3:FOXD4:FOXD4L1:FOXD4L3:FOXD4L4:FOXD4L5:FOXD4L6:FOXE1:FOXF1:FOXF2:FOXG1:FOXI1:FOXI3:FOXK2:FOXL1:FOXL2:FOXP4:FOXS1	ATRTTTACWTA	0.1	-4.333	0.1191	4	7.14%	202.3	1.61%
M01814_3.00:USF1:USF2	NATCACGTGRN	0.1	-4.332	0.1191	6	10.71%	436	3.47%
M00256_3.00:SOX1:SOX10:SOX11:SOX12:SOX13:SOX14:SOX15:SOX17:SOX18:SOX2:SOX21:SOX3:SOX30:SOX4:SOX5:SOX6:SOX7:SOX8:SOX9:SRY	ATTGTTNYNN	0.1	-4.331	0.1191	20	35.71%	2753.8	21.94%
M06222_3.00:FOSL2	ATGASTCA	0.1	-4.326	0.1196	14	25.00%	1665.8	13.27%
M01325_3.00:PBX1:PBX2:PBX3:PBX4	CWYRTCAAA	0.1	-4.325	0.1196	40	71.43%	7029.3	56.01%
M10928_3.00:TFAP4	NGVCCRCAGCTGK	0.1	-4.322	0.1198	6	10.71%	437	3.48%
M03268_3.00:GATA1:GATA2:GATA3:GATA4:GATA5:GATA6	AGATAASV	0.1	-4.322	0.1198	16	28.57%	2017.8	16.08%
M06567_3.00:KLF12:KLF3:KLF4:KLF5:KLF6:KLF7	GTGGGTGTGGC	0.1	-4.317	0.1202	4	7.14%	204	1.63%
M00353_3.00:HOXA13:HOXB13:HOXC13:HOXD13	TTTTATDRV	0.1	-4.316	0.1202	18	32.14%	2382.4	18.98%
M01801_3.00:ARNT:ARNT2	NRTCACGTGCWN	0.1	-4.312	0.1205	6	10.71%	437.8	3.49%
M02982_3.00:MITF:TFEC	ATCACGTGAY	0.1	-4.302	0.1214	6	10.71%	438.5	3.49%
M08773_3.00:ZBTB7A	CCGGAAGTG	0.1	-4.302	0.1214	6	10.71%	438	3.49%
M12192_3.00:MYB:MYBL1:MYBL2	DCCGTTRSR	0.1	-4.302	0.1214	6	10.71%	438.7	3.50%
M03267_3.00:GATA1:GATA2:GATA3:GATA4:GATA5:GATA6	AGATAAGR	0.1	-4.286	0.1232	16	28.57%	2025.2	16.14%
M02903_3.00:RELA	GGAAATTCCC	0.1	-4.285	0.1232	4	7.14%	205.1	1.63%
M08248_3.00:MXI1	VVAVCCACGTG	0.1	-4.281	0.1235	6	10.71%	440.7	3.51%
M02017_3.00:DMRT1:DMRT2:DMRT3:DMRTA2:DMRTB1:DMRTC2	AWWWGWTACA	0.1	-4.28	0.1235	10	17.86%	1015.4	8.09%
M06137_3.00:ZBTB5	NASTVGATCNCNNN	0.1	-4.28	0.1235	10	17.86%	1016	8.10%
M03193_3.00:EHF:ELF1:ELF2:ELF3:ELF4:ELF5:ETV6:ETV7:SPI1:SPIC	ACCCGGAAGTD	0.1	-4.271	0.1243	6	10.71%	441.6	3.52%
M10947_3.00:HES1:HES4	KCTBGTGB	0.1	-4.27	0.1243	28	50.00%	4369.6	34.82%
M03073_3.00:MAF:MAFA:MAFB:MAFG:MAFK:NRL	HGTCAGCAHTTT	0.1	-4.253	0.1264	4	7.14%	207.7	1.66%
M04419_3.00:TCF12:TCF3:TCF4	GCAGGTGB	0.1	-4.243	0.1274	26	46.43%	3963.8	31.59%
M05431_3.00:HESX1:NOBOX	CTAATTAW	0.1	-4.243	0.1274	8	14.29%	719	5.73%
M11246_3.00:REST	AAGGTGCT	0.1	-4.233	0.1285	14	25.00%	1684.4	13.42%
M11231_3.00:PRDM1	CTTTCACTTYCY	0.1	-4.231	0.1286	6	10.71%	445.8	3.55%
M11395_3.00:ZNF354C	SGTGG	0.1	-4.225	0.1293	52	92.86%	10222.9	81.46%
M00856_3.00:ZKSCAN5	HGKARDTGAN	0.1	-4.224	0.1293	28	50.00%	4383.8	34.93%
M11047_3.00:FOSL2	NGRTGASTCA	0.1	-4.223	0.1293	14	25.00%	1686.6	13.44%
M08479_3.00:KDM5B	GGCGGCRGCGGCGGC	0.1	-4.221	0.1293	4	7.14%	209.2	1.67%
M11793_3.00:CDX1:CDX2:CDX4	DYMATAAAW	0.1	-4.208	0.1309	14	25.00%	1689.4	13.46%
M04864_3.00:MBNL2	TYGCYTYGCTTH	0.1	-4.206	0.1309	4	7.14%	210.4	1.68%
M11373_3.00:SP2	GGGCGGGAC	0.1	-4.206	0.1309	4	7.14%	210.9	1.68%
M01569_3.00:ELF1:ELF2:ELF4:ELK1:ELK3:ELK4:ERF:ERG:ETS1:ETS2:ETV1:ETV2:ETV3:ETV3L:ETV4:ETV5:FEV:FLI1:GABPA	NACCGGAAGT	0.1	-4.201	0.1311	6	10.71%	448.6	3.57%
M03336_3.00:HOXA10:HOXA11:HOXA9:HOXB9:HOXC10:HOXC11:HOXC12:HOXC9:HOXD10:HOXD11:HOXD12:HOXD9	DTTTTATTRCY	0.1	-4.201	0.1311	6	10.71%	448.3	3.57%
M08596_3.00:NFXL1	TCCTCCTCCYYCTCC	0.1	-4.201	0.1311	6	10.71%	448.9	3.58%
M01095_3.00:FOXN2:FOXN3	NNNGYGTYNN	0.1	-4.195	0.1318	40	71.43%	7072.1	56.35%
M11307_3.00:BCL6	TTTCTAGGAA	0.1	-4.191	0.1322	6	10.71%	449.4	3.58%
M01322_3.00:HOXA3:HOXA4:HOXA5:HOXA6:HOXA7:HOXB3:HOXB4:HOXB5:HOXB6:HOXB7:HOXB8:HOXC4:HOXC5:HOXC6:HOXC8:HOXD3:HOXD4:HOXD8:PDX1	ATTAATTA	0.1	-4.19	0.1322	4	7.14%	211.1	1.68%
M10622_3.00:AC023509.3:ATF2:ATF7	RTGACGTCAYCN	0.1	-4.181	0.1332	6	10.71%	450.2	3.59%
M00214_3.00:ELF1:ELF2:ELF4:SPDEF	WNCCGGATNY	0.1	-4.179	0.1333	14	25.00%	1695.3	13.51%
M12642_3.00:JUN:JUNB:JUND	ATGAGTCA	0.1	-4.172	0.1342	6	10.71%	451.7	3.60%
M10882_3.00:TFAP2A:TFAP2B:TFAP2C:TFAP2D:TFAP2E	NGCCYCCGGSS	0.1	-4.169	0.1345	20	35.71%	2795.5	22.28%
M07984_3.00:ZNF263	GGGGAGGAG	0.1	-4.168	0.1345	12	21.43%	1357.7	10.82%
M08428_3.00:GATA1:GATA2:GATA3:GATA4:GATA5:GATA6	SAGATAAGRA	0.1	-4.167	0.1345	10	17.86%	1033.5	8.24%
M10196_3.00:ELF1:ELF2:ELF4:ELK1:ELK3:ELK4:ERF:ERG:ETS1:ETS2:ETV1:ETV2:ETV3:ETV3L:ETV4:ETV5:FEV:FLI1:GABPA	CAGGAAGT	0.1	-4.163	0.1349	22	39.29%	3184.6	25.38%
M04069_3.00:ALX1:ALX3:ALX4:ARX:BARX1:BARX2:BSX:DLX2:DLX3:DRGX:EMX1:EMX2:EN1:EN2:ESX1:EVX1:EVX2:GBX1:GBX2:GSX1:GSX2:HESX1:HOXA2:HOXA3:HOXB2:HOXB3:HOXD3:ISX:LBX1:LBX2:LHX1:LHX2:LHX3:LHX4:LHX5:LHX6:LHX8:LHX9:LMX1A:LMX1B:MEOX1:MIXL1:MNX1:MSX1:MSX2:NKX1-1:NKX1-2:NOBOX:NOTO:OTP:PDX1:PHOX2A:PHOX2B:PROP1:PRRX1:PRRX2:RAX:RAX2:SEBOX:SHOX:SHOX2:UNCX:VAX1:VAX2:VSX1:VSX2:ZFHX2	SSTAATTGCG	0.1	-4.162	0.1349	6	10.71%	452.1	3.60%
M10613_3.00:FOS:FOSB:FOSL1:FOSL2	NNATGASTCATH	0.1	-4.152	0.1361	6	10.71%	453.5	3.61%
M08260_3.00:MYC	RRCCACGTGGB	0.1	-4.142	0.1372	6	10.71%	454.1	3.62%
M10542_3.00:STAT3	CAYTTCCMGGAA	0.1	-4.132	0.1384	6	10.71%	455.3	3.63%
M01098_3.00:FOXN2:FOXN3	NNNGYGTCNN	0.1	-4.124	0.1395	40	71.43%	7096.5	56.55%
M11706_3.00:GATA1:GATA2:GATA3:GATA4:GATA5:GATA6	CAGATAAGG	0.1	-4.123	0.1395	6	10.71%	456.8	3.64%
M12491_3.00:STAT3	SGGAABBN	0.1	-4.11	0.1411	50	89.29%	9670.5	77.06%
M04363_3.00:NPAS2	RACATGYGTH	0.1	-4.109	0.1411	12	21.43%	1368.5	10.90%
M00893_3.00:ESR1:ESR2:HNF4A:HNF4G:NR1D1:NR1D2:NR1H2:NR1H3:NR1H4:NR2C1:NR2C2:NR2F1:NR2F2:NR2F6:NR4A1:NR4A2:NR4A3:NR5A2:NR6A1:PPARA:PPARD:PPARG:RARA:RARB:RARG:RORA:RORB:RORC:RXRA:RXRB:RXRG:THRA:THRB	RRGGTCAN	0.1	-4.093	0.1433	28	50.00%	4424.5	35.26%
M04763_3.00:SP1:SP3:SP4:SP5:SP6:SP8:SP9	RGKGGGCGTGGCN	0.1	-4.084	0.1445	4	7.14%	218.4	1.74%
M04456_3.00:ATF2	BRTKACGTCAYN	0.1	-4.075	0.1453	6	10.71%	461.8	3.68%
M10240_3.00:GATA1:GATA2:GATA3:GATA4:GATA5:GATA6	RSAGATAAGA	0.1	-4.075	0.1453	6	10.71%	461.6	3.68%
M10246_3.00:GATA1:GATA2:GATA3:GATA4:GATA5:GATA6	RSAGATAAGA	0.1	-4.075	0.1453	6	10.71%	461.6	3.68%
M01327_3.00:HOXA11:HOXA6:HOXA7:HOXB6:HOXB7:HOXB8:HOXC11:HOXC6:HOXC8:HOXD11:HOXD8	TTTTATKRYH	0.1	-4.064	0.1468	10	17.86%	1050.8	8.37%
M11716_3.00:GATA1:GATA2:GATA3:GATA4:GATA5:GATA6	AGATAAV	0.1	-4.059	0.1473	20	35.71%	2824.1	22.50%
M11103_3.00:ATF3:JDP2	BATTRCGTCAKC	0.1	-4.058	0.1474	10	17.86%	1051	8.38%
M10159_3.00:E2F1:E2F2:E2F3:E2F4:E2F5:E2F6	GGGGGCGGGAARD	0.1	-4.054	0.1477	4	7.14%	220.1	1.75%
M04967_3.00:ELF1:ELF2:ELF4:ELK1:ELK3:ELK4:ERF:ERG:ETS1:ETS2:ETV1:ETV2:ETV3:ETV3L:ETV4:ETV5:FEV:FLI1:GABPA	RACMGGAAATS	0.1	-4.037	0.1502	6	10.71%	465	3.71%
M00234_3.00:MYB:MYBL1	YAACGGHCNN	0.1	-4.018	0.1529	6	10.71%	467.7	3.73%
M05052_3.00:FOXC1:FOXC2:FOXD1:FOXD2:FOXD3:FOXD4:FOXD4L1:FOXD4L3:FOXD4L4:FOXD4L5:FOXD4L6:FOXE1:FOXF1:FOXF2:FOXG1:FOXI1:FOXI3:FOXL1:FOXL2:FOXS1	DTGTTGACGTK	0.1	-4.01	0.1537	4	7.14%	223.2	1.78%
M05248_3.00:NKX2-1:NKX2-2:NKX2-3:NKX2-4:NKX2-5:NKX2-6:NKX2-8	CTCAACGAC	0.1	-4.01	0.1537	4	7.14%	223	1.78%
M11333_3.00:KLF1:KLF12:KLF2:KLF3:KLF4:KLF5:KLF6:KLF7	GGGGTGGKSK	0.1	-4.01	0.1537	22	39.29%	3227.7	25.72%
M05442_3.00:ALX1:ALX3:ALX4:ARX:BARX1:BARX2:BSX:DLX1:DLX2:DLX3:DLX4:DLX5:DLX6:DRGX:EMX1:EMX2:EN1:EN2:ESX1:EVX1:EVX2:GBX1:GBX2:GSX1:GSX2:HESX1:HMX1:HMX3:HOXA1:HOXA2:HOXA3:HOXA4:HOXA5:HOXB1:HOXB2:HOXB3:HOXB4:HOXB5:HOXC4:HOXC5:HOXD1:HOXD3:HOXD4:ISX:LHX2:LHX3:LHX4:LHX6:LHX8:LHX9:LMX1A:LMX1B:MEOX1:MIXL1:MNX1:MSX1:MSX2:NKX1-1:NKX1-2:NOBOX:NOTO:OTP:PDX1:PHOX2A:PHOX2B:PROP1:PRRX1:PRRX2:RAX:RAX2:SEBOX:SHOX…	RTTAAYGAB	0.1	-4.01	0.1537	10	17.86%	1059.9	8.45%
M11639_3.00:EHF:ELF1:ELF2:ELF3:ELF4:ELF5:ETV6:ETV7	CAGGAAAYD	0.1	-4.003	0.1544	24	42.86%	3628.6	28.92%
M10087_3.00:KLF1:KLF12:KLF2:KLF3:KLF4:KLF5:KLF6:KLF7	KGRAGWGGGTGKGGC	0.1	-3.982	0.1576	4	7.14%	226	1.80%
M08253_3.00:MAX	RVSCACGTGG	0.1	-3.981	0.1576	6	10.71%	471.5	3.76%
M00544_3.00:CRX:DMBX1:DPRX:GSC:GSC2:OTX1:OTX2:PITX1:PITX2:PITX3:TPRX1	NTAATCCN	0.1	-3.98	0.1576	26	46.43%	4043.7	32.22%
M11215_3.00:ZEB1:ZEB2	HWGAAACMG	0.1	-3.973	0.1585	24	42.86%	3637	28.98%
M06202_3.00:DNTTIP1	YGCATBVN	0.1	-3.963	0.1599	50	89.29%	9715.4	77.42%
M01567_3.00:ELF1:ELF2:ELF4:ELK1:ELK3:ELK4:ERF:ERG:ETS1:ETS2:ETV1:ETV2:ETV3:ETV3L:ETV4:ETV5:FEV:FLI1:GABPA	ACCGGAAGT	0.1	-3.962	0.1599	6	10.71%	473.8	3.78%
M00368_3.00:CRX:DMBX1:DPRX:GSC:GSC2:OTX1:OTX2:PITX1:PITX2:PITX3:TPRX1	NTAATCCN	0.1	-3.954	0.161	26	46.43%	4051.6	32.29%
M12498_3.00:EOMES:TBX2:TBX20:TBX3:TBX4:TBX5	TVAGGTGTTA	0.1	-3.953	0.161	12	21.43%	1398.1	11.14%
M01739_3.00:ARID5A:ARID5B	YAATATBD	0.1	-3.951	0.1612	28	50.00%	4469.2	35.61%
M01100_3.00:FOXN2:FOXN3	NNNGYGTHNN	0.1	-3.948	0.1615	36	64.29%	6225	49.60%
M01813_3.00:NPAS2	NSCACGTGTN	0.1	-3.926	0.165	6	10.71%	477.8	3.81%
M02961_3.00:TFAP2A:TFAP2B:TFAP2C:TFAP2D:TFAP2E	HGCCTSAGGCD	0.1	-3.917	0.1662	6	10.71%	478.2	3.81%
M04454_3.00:ATF2	NRTGACGTCAYN	0.1	-3.917	0.1662	6	10.71%	478.2	3.81%
M11401_3.00:ZFP42	AARATGGCKGCC	0.1	-3.911	0.167	4	7.14%	230.4	1.84%
M08601_3.00:NFXL1	STSCTCCC	0.1	-3.911	0.167	18	32.14%	2483.4	19.79%
M04503_3.00:ATF2:CREB5	NRTGACGTCAYN	0.1	-3.898	0.1688	6	10.71%	480.7	3.83%
M02107_3.00:GCM1:GCM2	HACCCGCATN	0.1	-3.898	0.1688	10	17.86%	1078.7	8.60%
M06001_3.00:TBX15:TBX18:TBX20:TBX22	RRAGGTGTGAAR	0.1	-3.897	0.1688	4	7.14%	231.1	1.84%
M06292_3.00:CSRNP2	DBSGTGSGN	0.1	-3.89	0.1696	36	64.29%	6244.4	49.76%
M04457_3.00:ATF2	SATKACRTCAYS	0.1	-3.889	0.1696	6	10.71%	481.7	3.84%
M02363_3.00:NAIF1	BDRCGTARN	0.1	-3.888	0.1697	12	21.43%	1411.9	11.25%
M04953_3.00:ELF1:ELF2:ELF4:SPDEF	NAMCAGGATGTD	0.1	-3.883	0.1704	4	7.14%	232.4	1.85%
M09842_3.00:EPAS1:HIF1A	GKCACGTAC	0.1	-3.88	0.1706	6	10.71%	482.9	3.85%
M10673_3.00:GATA1:GATA2:GATA3:GATA4:GATA5:GATA6	SAGATAAGVV	0.1	-3.871	0.172	6	10.71%	483.7	3.85%
M06485_3.00:OSR2	BDGCTACTGTKYKD	0.1	-3.869	0.172	4	7.14%	233.3	1.86%
M10160_3.00:E2F1:E2F2:E2F3:E2F4:E2F5:E2F6	RGGGGGCGGGAMNN	0.1	-3.869	0.172	4	7.14%	233.1	1.86%
M10639_3.00:KLF1:KLF12:KLF2:KLF3:KLF4:KLF5:KLF6:KLF7	NWGGGTGTGGCY	0.1	-3.869	0.172	4	7.14%	233.5	1.86%
M10703_3.00:CDX1:CDX2:CDX4:HOXA13:HOXC13	WTTTATGRCC	0.1	-3.869	0.172	4	7.14%	233.2	1.86%
M04396_3.00:HES7	GGCACGYGBV	0.1	-3.868	0.172	12	21.43%	1415.6	11.28%
M09854_3.00:TCF12:TCF3:TCF4	CACAGCTGCH	0.1	-3.865	0.1721	16	28.57%	2123.1	16.92%
M00359_3.00:BARX1:BARX2:BSX:EMX1:EMX2:EN1:EN2:EVX1:EVX2:GBX1:GBX2:GSX1:GSX2:HMX1:HMX2:HMX3:HOXA1:HOXA2:HOXA3:HOXA4:HOXA5:HOXB1:HOXB2:HOXB3:HOXB4:HOXB5:HOXC4:HOXC5:HOXD1:HOXD3:HOXD4:LBX2:MEOX1:MEOX2:MNX1:NANOG:NANOGP8:NKX1-1:NKX1-2:PDX1:TLX2:VENTX	AATATATAY	0.1	-3.854	0.1739	6	10.71%	485.6	3.87%
M11407_3.00:ZBTB2	TSAGGAGGA	0.1	-3.851	0.1742	24	42.86%	3675	29.28%
M02514_3.00:LCOR	AGTTTCGRTB	0.1	-3.836	0.1767	6	10.71%	487.3	3.88%
M03675_3.00:GMEB1:GMEB2	KTACGTAA	0.1	-3.831	0.1773	8	14.29%	776.8	6.19%
M05348_3.00:ALX1:ALX3:ALX4:ARX:BARHL1:BARHL2:BARX1:BARX2:BSX:DRGX:EMX1:EMX2:EN1:EN2:ESX1:EVX1:EVX2:GBX1:GBX2:GSX1:GSX2:HESX1:HOXA2:HOXA3:HOXB2:HOXB3:HOXD3:ISX:LBX1:LBX2:LHX1:LHX2:LHX3:LHX4:LHX5:LHX6:LHX8:LHX9:LMX1A:LMX1B:MEOX1:MEOX2:MIXL1:MNX1:MSX1:MSX2:NKX1-1:NKX1-2:NOBOX:NOTO:OTP:PDX1:PHOX2A:PHOX2B:PROP1:PRRX1:PRRX2:RAX:RAX2:SEBOX:SHOX:SHOX2:UNCX:VAX1:VAX2:VSX1:VSX2:ZFHX2	CTAATTAN	0.1	-3.818	0.1795	8	14.29%	778.9	6.21%
M05998_3.00:EOMES:TBR1:TBX21	RAGGTGTGAA	0.1	-3.815	0.1799	4	7.14%	237.5	1.89%
M00711_3.00:DMRT1:DMRT2:DMRT3:DMRTA2:DMRTB1:DMRTC2	WTWGATACAW	0.1	-3.811	0.1804	8	14.29%	779.7	6.21%
M05195_3.00:BARHL1:BARHL2:BARX1:BARX2:BSX:DLX2:DLX3:EMX1:EMX2:ESX1:EVX1:EVX2:GBX1:GBX2:HESX1:HMX1:HMX2:HMX3:HOXA1:HOXA2:HOXA3:HOXA4:HOXA5:HOXB1:HOXB2:HOXB3:HOXB4:HOXB5:HOXC4:HOXC5:HOXD1:HOXD12:HOXD3:HOXD4:LBX1:LBX2:MEOX1:MEOX2:MNX1:MSX1:MSX2:NANOG:NANOGP8:NKX1-1:NKX1-2:PDX1:RAX:RAX2:TLX1:TLX3:VENTX	BTAATTRV	0.1	-3.806	0.1812	26	46.43%	4098.9	32.66%
M03293_3.00:RHOXF1	GGATTATCC	0.1	-3.792	0.1836	6	10.71%	492.4	3.92%
M11259_3.00:MZF1	TGGGGAG	0.1	-3.792	0.1836	30	53.57%	4948.1	39.43%
M08250_3.00:MAX	VRRGCACGTGG	0.1	-3.783	0.1848	6	10.71%	493.7	3.93%
M05973_3.00:SOX1:SOX10:SOX11:SOX12:SOX13:SOX14:SOX15:SOX17:SOX18:SOX2:SOX21:SOX3:SOX30:SOX4:SOX5:SOX6:SOX7:SOX8:SOX9:SRY	MCATTGTSVS	0.1	-3.778	0.1855	12	21.43%	1433.1	11.42%
M00281_3.00:KLF1:KLF12:KLF2:KLF3:KLF4:KLF5:KLF6:KLF7:KLF8	TGGGCGGG	0.1	-3.776	0.1858	16	28.57%	2145.9	17.10%
M11075_3.00:ATF1:CREB1:CREM	GSTGACGTAABS	0.1	-3.775	0.1858	4	7.14%	240.6	1.92%
M10617_3.00:FOS:FOSB:FOSL1:FOSL2	NATGASTCABNN	0.1	-3.774	0.1858	6	10.71%	494.4	3.94%
M12514_3.00:TBP:TBPL2	TTTTATASCCB	0.1	-3.766	0.1872	6	10.71%	495.6	3.95%
M10304_3.00:ALX1:ALX3:ALX4:ARX:BARHL1:BARHL2:BARX1:BARX2:BSX:DLX1:DLX2:DLX3:DLX4:DLX5:DLX6:DRGX:EMX1:EMX2:EN1:EN2:ESX1:EVX1:EVX2:GBX1:GBX2:GSX1:GSX2:HOXA1:HOXA2:HOXA3:HOXA4:HOXA5:HOXB1:HOXB2:HOXB3:HOXB4:HOXB5:HOXC4:HOXC5:HOXD1:HOXD3:HOXD4:ISX:MEOX1:MEOX2:MIXL1:MNX1:MSX1:MSX2:NANOG:NANOGP8:NKX1-1:NKX1-2:OTP:PDX1:PHOX2A:PHOX2B:PROP1:PRRX1:PRRX2:RAX:RAX2:SEBOX:SHOX:SHOX2:UNCX:VAX1:VAX2:VENTX:VSX1:VS…	KYTAATTGTTTT	0.1	-3.762	0.1878	4	7.14%	241.2	1.92%
M02206_3.00:SIX3:SIX6	NNGGDGATAN	0.1	-3.756	0.1886	26	46.43%	4114.9	32.79%
M01575_3.00:ELF1:ELF2:ELF4:ELK1:ELK3:ELK4:ERF:ERG:ETS1:ETS2:ETV1:ETV2:ETV3:ETV3L:ETV4:ETV5:FEV:FLI1:GABPA	NRCCGGAART	0.1	-3.752	0.1893	16	28.57%	2151.4	17.14%
M08830_3.00:E2F1:E2F2:E2F3:E2F4:E2F5:E2F6	GGCGGGAA	0.1	-3.751	0.1893	8	14.29%	788.4	6.28%
M12004_3.00:IRF1:IRF2	NRGAAAGTGAAAST	0.1	-3.748	0.1895	4	7.14%	242.5	1.93%
M03215_3.00:EHF:ELF1:ELF2:ELF3:ELF4:ELF5:ETV6:ETV7:SPI1:SPIC	ACCCGGAAGTD	0.1	-3.74	0.191	6	10.71%	498.6	3.97%
M02727_3.00:ELF1:ELF2:ELF4:ELK1:ELK3:ELK4:ERF:ERG:ETS1:ETS2:ETV1:ETV2:ETV3:ETV3L:ETV4:ETV5:FEV:FLI1:GABPA	VCGGATAYH	0.1	-3.739	0.191	10	17.86%	1106.8	8.82%
M10478_3.00:RELA	GGGAAAKTCCC	0.1	-3.735	0.1915	4	7.14%	243.5	1.94%
M06768_3.00:BARHL1:BARHL2:HOXA6:HOXB6:HOXB8:HOXC6:HOXC8:HOXD8:NKX1-1:NKX1-2	TTTAATTG	0.1	-3.723	0.1937	6	10.71%	500.8	3.99%
M08027_3.00:ZNF714	SAGCAGCAMYGC	0.1	-3.722	0.1937	4	7.14%	244.5	1.95%
M08142_3.00:ZNF786	GYCCCAG	0.1	-3.719	0.194	24	42.86%	3715.3	29.61%
M08966_3.00:NFYC	TGATTGG	0.1	-3.714	0.1948	6	10.71%	501.8	4.00%
M06602_3.00:GATA1:GATA2:GATA3:GATA4:GATA5:GATA6	WGATAAGR	0.1	-3.706	0.1963	6	10.71%	502.1	4.00%
M00355_3.00:HOXA13:HOXB13:HOXC13:HOXD13	TTTTATTA	0.1	-3.684	0.2003	10	17.86%	1116.6	8.90%
M02071_3.00:FOXO1:FOXO3:FOXO4:FOXO6	DTGTTTACNN	0.1	-3.678	0.2015	18	32.14%	2545.2	20.28%
M08732_3.00:MZF1	TGGGGATT	0.1	-3.652	0.2065	8	14.29%	803.4	6.40%
M08760_3.00:OSR2	ACAGAAGC	0.1	-3.652	0.2065	10	17.86%	1122.1	8.94%
M01112_3.00:TBX2:TBX3:TBX4:TBX5	NAGGTGTBAN	0.1	-3.635	0.2098	22	39.29%	3338	26.60%
M03373_3.00:BARX1:BARX2:BSX:EMX1:EMX2:EN1:EN2:EVX1:EVX2:GBX1:GBX2:GSX1:GSX2:HMX1:HMX2:HMX3:HOXA1:HOXA2:HOXA3:HOXA4:HOXA5:HOXB1:HOXB2:HOXB3:HOXB4:HOXB5:HOXC4:HOXC5:HOXD1:HOXD3:HOXD4:LBX2:MEOX1:MEOX2:MNX1:NANOG:NANOGP8:NKX1-1:NKX1-2:PDX1:TLX2:VENTX	CTAATCGKT	0.1	-3.633	0.2099	4	7.14%	251.1	2.00%
M10185_3.00:ELF1:ELF2:ELF4:ELK1:ELK3:ELK4:ERF:ERG:ETS1:ETS2:ETV1:ETV2:ETV3:ETV3L:ETV4:ETV5:FEV:FLI1:GABPA	VRCAGGAAGKR	0.1	-3.629	0.2105	16	28.57%	2182.2	17.39%
M11421_3.00:SP1:SP3:SP4:SP5:SP8:SP9	VGGGGCGGGGC	0.1	-3.625	0.2113	10	17.86%	1127.2	8.98%
M00367_3.00:CRX:DMBX1:DPRX:GSC:GSC2:OTX1:OTX2:PITX1:PITX2:PITX3:TPRX1	NNNTATTAATTAN	0.1	-3.62	0.212	4	7.14%	252.9	2.02%
M02010_3.00:DMRT1:DMRT2:DMRT3:DMRTA2:DMRTB1:DMRTC2	TNGHTACAWT	0.1	-3.609	0.2143	10	17.86%	1130.5	9.01%
M04077_3.00:ALX1:ALX3:ALX4:ARX:DRGX:EN1:EN2:ESX1:HESX1:ISX:LHX2:LHX3:LHX4:LHX6:LHX8:LHX9:LMX1A:LMX1B:MIXL1:NOBOX:OTP:PHOX2A:PHOX2B:PROP1:PRRX1:PRRX2:RAX:RAX2:SEBOX:SHOX:SHOX2:UNCX:VSX1:VSX2:ZFHX2	TTAATTAA	0.1	-3.608	0.2143	4	7.14%	253.4	2.02%
M11679_3.00:FOXC1:FOXC2:FOXD1:FOXD2:FOXD3:FOXD4:FOXD4L1:FOXD4L3:FOXD4L4:FOXD4L5:FOXD4L6:FOXE1:FOXF1:FOXG1:FOXI1:FOXI2:FOXI3:FOXJ2:FOXJ3:FOXK1:FOXK2:FOXL1:FOXL2:FOXS1	TAAAYAAACAHSM	0.1	-3.608	0.2143	4	7.14%	253.3	2.02%
M09925_3.00:FOS:FOSB:FOSL1:FOSL2	VTGAGTCAY	0.1	-3.597	0.2161	6	10.71%	515.1	4.10%
M10876_3.00:TFAP2A:TFAP2B:TFAP2C:TFAP2D:TFAP2E	GCCYGCRGSC	0.1	-3.594	0.2165	16	28.57%	2191.5	17.46%
M00867_3.00:FOXC1:FOXC2:FOXD1:FOXD2:FOXD3:FOXD4:FOXD4L1:FOXD4L3:FOXD4L4:FOXD4L5:FOXD4L6:FOXE1:FOXF1:FOXF2:FOXG1:FOXI1:FOXI3:FOXJ3:FOXK2:FOXL1:FOXL2:FOXP1:FOXS1	TGTTTAYNTW	0.1	-3.586	0.2181	14	25.00%	1828	14.57%
M08128_3.00:ZNF846	SCGGGA	0.1	-3.583	0.2187	12	21.43%	1474.2	11.75%
M06701_3.00:IRX1:IRX3:IRX6	AAAWAACA	0.1	-3.58	0.219	26	46.43%	4172	33.25%
M05789_3.00:HNF4A:HNF4G:NR2E1	MRAAGTCAM	0.1	-3.576	0.2197	18	32.14%	2573.7	20.51%
M00286_3.00:EGR1:EGR2:EGR3	TGCGKGGG	0.1	-3.573	0.2201	12	21.43%	1476.2	11.76%
M12230_3.00:HNF4A:HNF4G:NR2E1:NR2F1:NR2F2:NR2F6:NR6A1:RXRB:RXRG	AAGTCCAG	0.1	-3.573	0.2201	6	10.71%	518.2	4.13%
M05824_3.00:NR1I2:NR1I3:VDR	AAAGTTCGY	0.1	-3.565	0.2217	6	10.71%	519.6	4.14%
M02045_3.00:E2F1:E2F2:E2F3:E2F4:E2F5:E2F6	WTGGCGCCAW	0.1	-3.559	0.2227	4	7.14%	257.8	2.05%
M03465_3.00:MEIS1:MEIS2:MEIS3:PKNOX1:PKNOX2:TGIF1:TGIF2	WTGACAG	0.1	-3.551	0.2235	22	39.29%	3364.5	26.81%
M04063_3.00:MEIS1:MEIS2:MEIS3:PKNOX1:PKNOX2:TGIF1:TGIF2:TGIF2LX:TGIF2LY	TGACAG	0.1	-3.551	0.2235	22	39.29%	3364.5	26.81%
M04064_3.00:MEIS1:MEIS2:MEIS3:PKNOX1:PKNOX2:TGIF1:TGIF2:TGIF2LX:TGIF2LY	TGACAG	0.1	-3.551	0.2235	22	39.29%	3364.5	26.81%
M06739_3.00:MEIS1:MEIS2:MEIS3:PKNOX1:PKNOX2:TGIF1:TGIF2:TGIF2LX:TGIF2LY	TGACA	0.1	-3.551	0.2235	22	39.29%	3364.5	26.81%
M06742_3.00:MEIS1:MEIS2:MEIS3:PKNOX1:PKNOX2:TGIF1:TGIF2:TGIF2LX:TGIF2LY	TTGACA	0.1	-3.551	0.2235	22	39.29%	3364.5	26.81%
M00865_3.00:FOXO1:FOXO3:FOXO4:FOXO6	NTGTTTAYNN	0.1	-3.55	0.2235	24	42.86%	3769.7	30.04%
M06619_3.00:CDX1:CDX2:CDX4:HOXA13:HOXC13	WTTTATTA	0.1	-3.55	0.2235	10	17.86%	1141.8	9.10%
M04429_3.00:OLIG2:OLIG3	AACAKMTGTT	0.1	-3.547	0.2238	4	7.14%	258.6	2.06%
M12260_3.00:ESR1:ESR2:NR1D1:NR1D2:NR1H2:NR1H3:NR1H4:NR2C1:NR2C2:NR2F1:NR2F2:NR2F6:NR4A1:NR5A2:NR6A1:PPARA:PPARD:PPARG:RARA:RARB:RARG:RORA:RORB:RORC:RXRA:RXRB:RXRG	AAAGGTCAVN	0.1	-3.544	0.2241	16	28.57%	2204.6	17.57%
M08666_3.00:SREBF1:SREBF2	ATCACCCCAT	0.1	-3.54	0.2248	6	10.71%	522.1	4.16%
M09320_3.00:ZNF813	DGAAGGAGGRGGCAGV	0.1	-3.537	0.2254	2	3.57%	58.3	0.46%
M02510_3.00:PAX1:PAX2:PAX3:PAX5:PAX6:PAX7:PAX8:PAX9	NRTGVNYNVN	0.1	-3.533	0.226	56	100.00%	11780.9	93.88%
M11120_3.00:CEBPA:CEBPB:CEBPE	VTTDKGCAATH	0.1	-3.525	0.2275	16	28.57%	2209.7	17.61%
M04241_3.00:JUN:JUNB:JUND	RTGMGTCAT	0.1	-3.524	0.2275	6	10.71%	525	4.18%
M09431_3.00:SP1:SP3:SP4:SP8:SP9	RGGGGGCGGGGCCDR	0.1	-3.524	0.2275	6	10.71%	524.2	4.18%
M11089_3.00:JUN:JUNB:JUND	TGACGTCAY	0.1	-3.524	0.2275	6	10.71%	524.5	4.18%
M10946_3.00:HES1:HES4	VTCKYGTGCSY	0.1	-3.524	0.2275	10	17.86%	1146.7	9.14%
M06232_3.00:YY1	HAAAATGGCGGCB	0.1	-3.522	0.2275	4	7.14%	260.8	2.08%
M00876_3.00:IRF1:IRF2	AAANYGAAAS	0.1	-3.511	0.2295	14	25.00%	1845.7	14.71%
M04560_3.00:MAF:MAFA:MAFB:MAFG:MAFK:NRL	HGTCAGCANWWTY	0.1	-3.51	0.2295	4	7.14%	261.7	2.09%
M08204_3.00:BHLHA9	VGKVACASCTGSTBB	0.1	-3.506	0.2303	8	14.29%	826.4	6.59%
M00868_3.00:FOXO1:FOXO3:FOXO4:FOXO6:FOXP4	TTGTTTAC	0.1	-3.492	0.2332	10	17.86%	1153	9.19%
M11054_3.00:ATF1:CREB1:CREM	BGSTGACGTCA	0.1	-3.492	0.2332	6	10.71%	528.5	4.21%
M00825_3.00:SREBF1:SREBF2	RTCRCGTGAT	0.1	-3.486	0.2343	12	21.43%	1495.6	11.92%
M04433_3.00:ATF1:CREB1:CREM	NVTGACGTCAYS	0.1	-3.484	0.2343	6	10.71%	529.8	4.22%
M05612_3.00:HOXA3:HOXA4:HOXA5:HOXA6:HOXA7:HOXB3:HOXB4:HOXB5:HOXB6:HOXB7:HOXB8:HOXC4:HOXC5:HOXC6:HOXC8:HOXD3:HOXD4:HOXD8:PDX1	VHTAATTACS	0.1	-3.484	0.2343	6	10.71%	529.9	4.22%
M01287_3.00:TIGD6	TWACGAANW	0.1	-3.477	0.2359	6	10.71%	530.7	4.23%
M08733_3.00:KLF1:KLF12:KLF2:KLF3:KLF4:KLF5:KLF6:KLF7:KLF8	DGGGHGGGGC	0.1	-3.469	0.2375	16	28.57%	2224.3	17.72%
M00174_3.00:BHLHE40:BHLHE41	GKCACGTGH	0.1	-3.469	0.2375	6	10.71%	531.7	4.24%
M11720_3.00:GATA1:GATA2:GATA3:GATA4:GATA5:GATA6	GATAAGN	0.1	-3.463	0.2386	20	35.71%	2994.8	23.86%
M06723_3.00:SIX3:SIX6	WAGTGATA	0.1	-3.461	0.2386	10	17.86%	1158.8	9.23%
M09485_3.00:ZBTB18	CACAKCTGG	0.1	-3.457	0.2395	8	14.29%	834.8	6.65%
M03756_3.00:EOMES:TBX2:TBX20:TBX3:TBX4:TBX5	AGGTGTGA	0.1	-3.443	0.2427	16	28.57%	2231.8	17.78%
M00380_3.00:SIX3:SIX6	NNTGATAY	0.1	-3.441	0.2429	30	53.57%	5071.6	40.41%
M01563_3.00:ELF1:ELF2:ELF4:ELK1:ELK3:ELK4:ERF:ERG:ETS1:ETS2:ETV1:ETV2:ETV3:ETV3L:ETV4:ETV5:FEV:FLI1:GABPA	NRCCGGAAGT	0.1	-3.437	0.2436	6	10.71%	535.5	4.27%
M01802_3.00:ARNT:ARNT2	KCACRTGAAT	0.1	-3.436	0.2437	10	17.86%	1164	9.28%
M12486_3.00:STAT4	TTMHRRGAAA	0.1	-3.431	0.2448	10	17.86%	1164.5	9.28%
M02106_3.00:GCM1:GCM2	ACCCGCAT	0.1	-3.43	0.2448	6	10.71%	536.6	4.28%
M09911_3.00:ATF2	ATGACVTCAYY	0.1	-3.43	0.2448	6	10.71%	536.3	4.27%
M09950_3.00:ATF2:CREB5	ATGACVTCAYY	0.1	-3.43	0.2448	6	10.71%	536.3	4.27%
M00230_3.00:IRF4:IRF8	NWNCGAAACY	0.1	-3.424	0.2455	16	28.57%	2236.2	17.82%
M11360_3.00:ZNF281	TGGGGGAGGGG	0.1	-3.414	0.2477	6	10.71%	538.5	4.29%
M12448_3.00:SOX1:SOX10:SOX11:SOX12:SOX13:SOX14:SOX15:SOX17:SOX18:SOX2:SOX21:SOX3:SOX30:SOX4:SOX5:SOX6:SOX7:SOX8:SOX9:SRY	VACAATDGA	0.1	-3.4	0.251	10	17.86%	1170.4	9.33%
M00121_3.00:RFX1:RFX2:RFX3:RFX4	NSGTTGCYAB	0.1	-3.399	0.2511	6	10.71%	540.3	4.31%
M01289_3.00:YBX1:YBX2:YBX3	NNNGRTRG	0.1	-3.389	0.2533	52	92.86%	10466.5	83.40%
M09730_3.00:CIC:SOX1:SOX10:SOX11:SOX12:SOX13:SOX14:SOX15:SOX17:SOX18:SOX2:SOX21:SOX3:SOX4:SOX5:SOX6:SOX7:SOX8:SOX9:SRY	BTATTGTB	0.1	-3.385	0.254	14	25.00%	1876.2	14.95%
M10705_3.00:BARX1:BARX2:BSX:EMX1:EMX2:EN1:EN2:EVX1:EVX2:GBX1:GBX2:GSX1:GSX2:HMX1:HMX2:HMX3:HOXA1:HOXA2:HOXA3:HOXA4:HOXA5:HOXA7:HOXB1:HOXB2:HOXB3:HOXB4:HOXB5:HOXB7:HOXC4:HOXC5:HOXD1:HOXD3:HOXD4:MEOX1:MEOX2:MNX1:NANOG:NANOGP8:NKX1-1:NKX1-2:NOTO:OTP:PDX1:TLX2:VAX1:VAX2:VENTX	ATGATTRATG	0.1	-3.384	0.2543	6	10.71%	542.4	4.32%
M11822_3.00:ALX1:ALX3:ALX4:ARX:BARHL1:BARHL2:BARX1:BARX2:BSX:DLX1:DLX2:DLX3:DLX4:DLX5:DLX6:DRGX:EMX1:EMX2:EN1:EN2:ESX1:EVX1:EVX2:GBX1:GBX2:GSX1:GSX2:HMX1:HMX2:HMX3:HOXA1:HOXA2:HOXA3:HOXA4:HOXA5:HOXA6:HOXA7:HOXB1:HOXB2:HOXB3:HOXB4:HOXB5:HOXB6:HOXB7:HOXB8:HOXC4:HOXC5:HOXC6:HOXD1:HOXD3:HOXD4:HOXD8:ISX:LHX3:LHX4:MEOX1:MEOX2:MIXL1:MNX1:MSX1:MSX2:NANOG:NANOGP8:NKX1-1:NKX1-2:NOBOX:NOTO:OTP:PDX1:PHOX2A:P…	MRCTAATTAS	0.1	-3.382	0.2544	4	7.14%	273	2.18%
M04981_3.00:ELF1:ELF2:ELF4:ELK1:ELK3:ELK4:ERF:ERG:ETS1:ETS2:ETV1:ETV2:ETV3:ETV3L:ETV4:ETV5:FEV:FLI1:GABPA	VACMGGAARTS	0.1	-3.376	0.2556	6	10.71%	543.6	4.33%
M10272_3.00:HOXA13:HOXB13:HOXC13:HOXD13	TTTTATDGGY	0.1	-3.376	0.2556	6	10.71%	543.5	4.33%
M03836_3.00:NRL	CGTCAGCANWTT	0.1	-3.371	0.2566	4	7.14%	273.3	2.18%
M08703_3.00:FOS:FOSB:FOSL1:FOSL2	ATGASTCA	0.1	-3.361	0.259	6	10.71%	545.8	4.35%
M08543_3.00:ZNF404	GAGACRGAGTCTCRC	0.1	-3.36	0.259	10	17.86%	1178.6	9.39%
M00313_3.00:FOXC1:FOXC2:FOXD1:FOXD2:FOXD3:FOXD4:FOXD4L1:FOXD4L3:FOXD4L4:FOXD4L5:FOXD4L6:FOXE1:FOXF1:FOXF2:FOXG1:FOXI1:FOXI3:FOXK2:FOXL1:FOXL2:FOXP4:FOXS1	NTTGTTTTATN	0.1	-3.355	0.2601	10	17.86%	1180	9.40%
M04467_3.00:ATF1:CREB1:CREM	TACGTCACV	0.1	-3.346	0.2623	6	10.71%	547.6	4.36%
M06568_3.00:KLF12:KLF3:KLF4:KLF5:KLF6:KLF7	DRTGGGTGTGGCHBK	0.1	-3.337	0.2642	4	7.14%	276	2.20%
M08493_3.00:ZNF426	GAGACRGAGTCTCRC	0.1	-3.335	0.2646	10	17.86%	1183.5	9.43%
M00232_3.00:IRF5	NANCGAAACY	0.1	-3.33	0.2657	14	25.00%	1890.1	15.06%
M11883_3.00:HMBOX1:HNF1A:HNF1B	CTGACCCC	0.1	-3.329	0.2657	20	35.71%	3035.9	24.19%
M04031_3.00:ALX1:ALX3:ALX4:ARX:BARHL1:BARHL2:BSX:DLX1:DLX2:DLX3:DLX4:DLX5:DLX6:DRGX:EMX1:EMX2:EN1:EN2:ESX1:GBX1:GBX2:GSX1:GSX2:HESX1:HMX1:HMX2:HMX3:HOXA3:HOXB3:HOXD3:ISX:LBX1:LBX2:LHX1:LHX2:LHX3:LHX4:LHX5:LHX6:LHX8:LHX9:LMX1A:LMX1B:MEOX1:MIXL1:MSX1:MSX2:NKX1-1:NKX1-2:NOBOX:NOTO:OTP:PDX1:PHOX2A:PHOX2B:PROP1:PRRX1:PRRX2:RAX:RAX2:SEBOX:SHOX:SHOX2:UNCX:VAX1:VAX2:VSX1:VSX2:ZFHX2	RCTAATTAAC	0.1	-3.326	0.266	4	7.14%	277.6	2.21%
M11290_3.00:GLI1:GLI2:GLI3	STGGGTGGTCT	0.1	-3.326	0.266	4	7.14%	277.3	2.21%
M09961_3.00:JUN:JUNB:JUND	VTGAGTCAY	0.1	-3.323	0.2666	6	10.71%	550.3	4.39%
M06160_3.00:ZNF770	NDKTRGAGGCYGK	0.1	-3.295	0.274	14	25.00%	1899.9	15.14%
M08164_3.00:ZNF26	GTCATCA	0.1	-3.293	0.2742	6	10.71%	554.7	4.42%
M02163_3.00:HOXA13:HOXB13:HOXC13:HOXD13	TTTTATTA	0.1	-3.291	0.2747	10	17.86%	1192.3	9.50%
M04957_3.00:ELF1:ELF2:ELF4:ELK1:ELK3:ELK4:ERF:ERG:ETS1:ETS2:ETV1:ETV2:ETV3:ETV3L:ETV4:ETV5:FEV:FLI1:GABPA	NACCGGAAGTR	0.1	-3.286	0.2752	6	10.71%	556	4.43%
M10596_3.00:CLOCK	GHCACGTG	0.1	-3.286	0.2752	6	10.71%	555.5	4.43%
M12489_3.00:STAT6	HTTCCKGRGAA	0.1	-3.286	0.2752	6	10.71%	555.3	4.42%
M02105_3.00:GCM1:GCM2	HACCCGYATN	0.1	-3.286	0.2752	10	17.86%	1193.2	9.51%
M00348_3.00:HOXA13:HOXB13:HOXC13:HOXD13	DTTTATDRBN	0.1	-3.278	0.2769	18	32.14%	2659.6	21.19%
M10587_3.00:ASCL1:ASCL2	NNVVCAGCTGBN	0.1	-3.274	0.2778	22	39.29%	3453.9	27.52%
M11079_3.00:ATF1:CREB1:CREM	BKSACGTCAYBN	0.1	-3.264	0.2804	6	10.71%	558.1	4.45%
M02062_3.00:FOXI1:FOXI2:FOXI3:FOXJ1:FOXJ2:FOXJ3:FOXK2:FOXP3	TTGTTTAY	0.1	-3.257	0.282	6	10.71%	559.5	4.46%
M04591_3.00:ZNF263	DGGGAGCACG	0.1	-3.257	0.282	6	10.71%	559.5	4.46%
M08067_3.00:ZNF613	AAAAAAAAK	0.1	-3.257	0.282	10	17.86%	1199.8	9.56%
M04192_3.00:TBX1	AGGTGTGAR	0.1	-3.25	0.2834	16	28.57%	2284.6	18.21%
M09477_3.00:ZNF596	AGAGRGAGVCMGAGC	0.1	-3.239	0.2862	4	7.14%	285.9	2.28%
M02547_3.00:GMEB1:GMEB2	NTACGTMR	0.1	-3.236	0.287	38	67.86%	6948	55.37%
M06254_3.00:GATA1:GATA2:GATA3:GATA4:GATA5:GATA6	GATAAS	0.1	-3.232	0.2878	26	46.43%	4293.1	34.21%
M04604_3.00:KLF1:KLF12:KLF2:KLF3:KLF4:KLF5:KLF6:KLF7	KGGGCGTGGYN	0.1	-3.227	0.289	8	14.29%	873	6.96%
M04976_3.00:ELF1:ELF2:ELF4:ELK1:ELK3:ELK4:ERF:ERG:ETS1:ETS2:ETV1:ETV2:ETV3:ETV3L:ETV4:ETV5:FEV:FLI1:GABPA	VACAGGAARTG	0.1	-3.22	0.2906	6	10.71%	564.8	4.50%
M02208_3.00:BARHL1:BARHL2:HOXA6:HOXB6:HOXB8:HOXC6:HOXC8:HOXD8:NKX1-1:NKX1-2	BTAAWTGN	0.1	-3.218	0.2909	18	32.14%	2677	21.33%
M05502_3.00:ALX1:ALX3:ALX4:ARX:BARX1:BARX2:BSX:DLX1:DLX2:DLX3:DLX4:DLX5:DLX6:DRGX:EMX1:EMX2:EN1:EN2:ESX1:EVX1:EVX2:GBX1:GBX2:GSX1:GSX2:HESX1:HOXA1:HOXA2:HOXA3:HOXB1:HOXB2:HOXB3:HOXD3:ISX:LBX1:LBX2:LHX1:LHX2:LHX3:LHX4:LHX5:LHX6:LHX8:LHX9:LMX1A:LMX1B:MEOX1:MIXL1:MNX1:MSX1:MSX2:NKX1-1:NKX1-2:NOBOX:NOTO:OTP:PDX1:PHOX2A:PHOX2B:PROP1:PRRX1:PRRX2:RAX:RAX2:SEBOX:SHOX:SHOX2:UNCX:VAX1:VAX2:VSX1:VSX2:ZFHX2:…	TAATSHAATTA	0.1	-3.218	0.2909	4	7.14%	287.4	2.29%
M10982_3.00:TCF12:TCF3:TCF4	VCAGGTG	0.1	-3.215	0.2914	26	46.43%	4299.1	34.26%
M10243_3.00:GATA1:GATA2:GATA3:GATA4:GATA5:GATA6	RSAGATAAGG	0.1	-3.213	0.2917	6	10.71%	565.3	4.50%
M08954_3.00:STAT3	TTCCCAGAA	0.1	-3.206	0.2933	6	10.71%	566.8	4.52%
M09846_3.00:MAX	VRGCACGTGG	0.1	-3.206	0.2933	6	10.71%	566.5	4.51%
M00898_3.00:SOX1:SOX10:SOX11:SOX12:SOX13:SOX14:SOX15:SOX17:SOX18:SOX2:SOX21:SOX3:SOX30:SOX4:SOX5:SOX6:SOX7:SOX8:SOX9:SRY	ATTGTNNN	0.1	-3.201	0.2945	30	53.57%	5160.7	41.12%
M09848_3.00:ARNTL	RGTCACGTGGM	0.1	-3.199	0.2949	6	10.71%	567.8	4.52%
M02943_3.00:GATA1:GATA2:GATA3:GATA4:GATA5:GATA6	WGATAA	0.1	-3.197	0.2951	20	35.71%	3077	24.52%
M05120_3.00:ALX1:ALX3:ALX4:ARX:BARHL1:BARHL2:BARX1:BARX2:BSX:DLX1:DLX2:DLX3:DLX4:DLX5:DLX6:DRGX:EMX1:EMX2:EN1:EN2:ESX1:EVX1:EVX2:GBX1:GBX2:GSX1:GSX2:HOXA1:HOXA2:HOXA3:HOXA4:HOXA5:HOXB1:HOXB2:HOXB3:HOXB4:HOXB5:HOXC4:HOXC5:HOXD1:HOXD3:HOXD4:ISX:MEOX1:MEOX2:MIXL1:MNX1:MSX1:MSX2:NANOG:NANOGP8:NKX1-1:NKX1-2:OTP:PDX1:PHOX2A:PHOX2B:PROP1:PRRX1:PRRX2:RAX:RAX2:SEBOX:SHOX:SHOX2:UNCX:VAX1:VAX2:VENTX:VSX1:VS…	NTAATGRTTTWN	0.1	-3.197	0.2951	4	7.14%	289.2	2.30%
M03678_3.00:GMEB1:GMEB2	TTACGTAA	0.1	-3.192	0.2963	6	10.71%	568.2	4.53%
M01829_3.00:HES5	GVCACGTGBC	0.1	-3.17	0.3024	6	10.71%	571.2	4.55%
M09346_3.00:ZNF814	YTAGGGAGGGAA	0.1	-3.165	0.3036	4	7.14%	292.1	2.33%
M08980_3.00:ATF3:JDP2	GTCACGTG	0.1	-3.163	0.304	6	10.71%	572.1	4.56%
M11794_3.00:CDX1:CDX2:CDX4	MATAAA	0.1	-3.157	0.3057	14	25.00%	1935.4	15.42%
M11718_3.00:GATA1:GATA2:GATA3:GATA4:GATA5:GATA6	AVAGATAAGA	0.1	-3.156	0.3057	6	10.71%	573.1	4.57%
M00297_3.00:KLF10:KLF11	GGGGGCGG	0.1	-3.156	0.3057	10	17.86%	1220.9	9.73%
M10963_3.00:MYF5:MYOD1:MYOG	GRCAGGTGBH	0.1	-3.148	0.3076	16	28.57%	2313.7	18.44%
M03271_3.00:GCM1:GCM2	TACCCGCATV	0.1	-3.145	0.3084	4	7.14%	294.9	2.35%
M05084_3.00:GATA1:GATA2:GATA3:GATA4:GATA5:GATA6	NWGATAASR	0.1	-3.145	0.3084	16	28.57%	2314.9	18.45%
M07995_3.00:ZNF684	MAAGGGGTG	0.1	-3.128	0.313	6	10.71%	577.3	4.60%
M06468_3.00:EGR1:EGR2:EGR3:EGR4	GTGYGTGGGCGKGG	0.1	-3.124	0.3139	4	7.14%	296.3	2.36%
M10970_3.00:MYCN	CAGRTG	0.1	-3.124	0.3139	42	75.00%	7942	63.29%
M10495_3.00:RUNX1:RUNX2:RUNX3	BYYTGTGGTTTB	0.1	-3.114	0.3166	4	7.14%	297.8	2.37%
M00795_3.00:GCM1:GCM2	NACCCGCATN	0.1	-3.114	0.3166	10	17.86%	1229.4	9.80%
M05175_3.00:BARX1:BARX2:BSX:EMX1:EMX2:EN1:EN2:EVX1:EVX2:GBX1:GBX2:GSX1:GSX2:HMX1:HMX2:HMX3:HOXA1:HOXA2:HOXA3:HOXA4:HOXA5:HOXA6:HOXA7:HOXA9:HOXB1:HOXB2:HOXB3:HOXB4:HOXB5:HOXB6:HOXB7:HOXB8:HOXB9:HOXC4:HOXC5:HOXC6:HOXC8:HOXC9:HOXD1:HOXD3:HOXD4:HOXD8:HOXD9:ISX:MEOX1:MEOX2:MNX1:NKX1-1:NKX1-2:NOTO:OTP:PDX1:VAX1:VAX2:VENTX	STAATKAC	0.1	-3.11	0.3173	16	28.57%	2324.2	18.52%
M10775_3.00:TEAD3:TEAD4	RCATTCCWGG	0.1	-3.109	0.3173	10	17.86%	1231	9.81%
M10164_3.00:E2F1:E2F2:E2F3:E2F4:E2F5:E2F6	GRGGGCGGGAAR	0.1	-3.104	0.3188	4	7.14%	298.7	2.38%
M01320_3.00:MEIS3	NTGACRKNN	0.1	-3.101	0.3194	52	92.86%	10555.6	84.11%
M12240_3.00:NR1H4:NR1I2:NR1I3:VDR	DRGGTSA	0.1	-3.099	0.32	48	85.71%	9460	75.38%
M08696_3.00:BATF:BATF3	TGAGTCA	0.1	-3.087	0.3233	6	10.71%	583.6	4.65%
M08701_3.00:BATF:BATF3	TGAGTCA	0.1	-3.087	0.3233	6	10.71%	583.6	4.65%
M05996_3.00:SOX1:SOX10:SOX11:SOX12:SOX13:SOX14:SOX15:SOX17:SOX18:SOX2:SOX21:SOX3:SOX30:SOX4:SOX5:SOX6:SOX7:SOX8:SOX9:SRY	SCATTGTB	0.1	-3.086	0.3233	10	17.86%	1235.4	9.84%
M10591_3.00:NPAS2	GTCACGTGGM	0.1	-3.08	0.3249	6	10.71%	584.1	4.65%
M06666_3.00:ISL1:ISL2:NOTO:SHOX:SHOX2:VSX1	CTTAATTG	0.1	-3.071	0.3274	8	14.29%	901.9	7.19%
M11228_3.00:IKZF1:IKZF2:IKZF3:IKZF4	HWTAGGGATAW	0.1	-3.068	0.3283	10	17.86%	1240	9.88%
M12406_3.00:SMAD1:SMAD3:SMAD9	RGNCAGACASMNB	0.1	-3.063	0.3295	10	17.86%	1240.5	9.88%
M00350_3.00:HOXA13:HOXB13:HOXC13:HOXD13	DTTTATDRB	0.1	-3.06	0.3303	18	32.14%	2726.8	21.73%
M03400_3.00:CDX1:CDX2:CDX4	TTTTATKRC	0.1	-3.059	0.3303	6	10.71%	587.7	4.68%
M05843_3.00:NR2C1:NR2F1:NR2F2:NR2F6:NR4A1:NR4A2:NR4A3:PPARD:RARG:RORA:RORB:RORC:RXRA:RXRB:RXRG	NAAAGGTCAH	0.1	-3.052	0.3323	6	10.71%	588.5	4.69%
M11936_3.00:PAX4	VGGGTGGRDRTB	0.1	-3.049	0.3332	16	28.57%	2342.9	18.67%
M00354_3.00:HOXA13:HOXB13:HOXC13:HOXD13	DTTTATDRB	0.1	-3.047	0.3334	18	32.14%	2730.7	21.76%
M00272_3.00:ZNF200	NWATTGAGWWN	0.1	-3.039	0.3359	8	14.29%	907.5	7.23%
M05004_3.00:ELF1:ELF2:ELF4:ELK1:ELK3:ELK4:ERF:ERG:ETS1:ETS2:ETV1:ETV2:ETV3:ETV3L:ETV4:ETV5:FEV:FLI1:GABPA	NRCCGGAWGYR	0.1	-3.039	0.3359	6	10.71%	590.2	4.70%
M11121_3.00:CEBPA:CEBPB:CEBPE	TTRTGCAATH	0.1	-3.039	0.3359	16	28.57%	2345.6	18.69%
M12650_3.00:ZNF692	GGGCCCAS	0.1	-3.031	0.3377	10	17.86%	1248	9.94%
M00224_3.00:SIX3:SIX6	NGTATCR	0.1	-3.029	0.3381	34	60.71%	6113.5	48.72%
M06246_3.00:SP1:SP3:SP4:SP5:SP8:SP9	WRKGGGCGKGGCH	0.1	-3.025	0.3394	4	7.14%	306.5	2.44%
M11842_3.00:NKX6-1:NKX6-2:NKX6-3	GTAATTAA	0.1	-3.015	0.3424	4	7.14%	307.3	2.45%
M05477_3.00:BARX1:BARX2:BSX:EMX1:EMX2:EN1:EN2:EVX1:EVX2:GBX1:GBX2:GSX1:GSX2:HMX1:HMX2:HMX3:HOXA1:HOXA2:HOXA3:HOXA4:HOXA5:HOXA6:HOXA7:HOXB1:HOXB2:HOXB3:HOXB4:HOXB5:HOXB6:HOXB7:HOXB8:HOXC4:HOXC5:HOXC6:HOXD1:HOXD3:HOXD4:HOXD8:ISX:MEOX1:MEOX2:MNX1:NKX1-1:NKX1-2:NOTO:OTP:PDX1:TLX2:VAX1:VAX2:VENTX	BTAATKRC	0.1	-3.012	0.3431	20	35.71%	3138.5	25.01%
M12470_3.00:CIC:SOX1:SOX10:SOX11:SOX12:SOX13:SOX14:SOX15:SOX17:SOX18:SOX2:SOX21:SOX3:SOX4:SOX5:SOX6:SOX7:SOX8:SOX9:SRY	AACAATRGR	0.1	-3.012	0.3431	6	10.71%	594.1	4.73%
M02533_3.00:RFX1:RFX2:RFX3:RFX4:RFX6	GTTGCYANGG	0.1	-3.009	0.3434	12	21.43%	1608	12.81%
M05590_3.00:BARX1:BARX2:BSX:EMX1:EMX2:EN1:EN2:EVX1:EVX2:GBX1:GBX2:GSX1:GSX2:HMX1:HMX2:HMX3:HOXA1:HOXA2:HOXA3:HOXA4:HOXA5:HOXA6:HOXA7:HOXB1:HOXB2:HOXB3:HOXB4:HOXB5:HOXB6:HOXB7:HOXB8:HOXC4:HOXC5:HOXC6:HOXD1:HOXD3:HOXD4:HOXD8:ISX:MEOX1:MEOX2:MNX1:NKX1-1:NKX1-2:NOTO:OTP:PDX1:TLX2:VAX1:VAX2:VENTX	BTAATGAB	0.1	-3.006	0.3444	14	25.00%	1976.5	15.75%
M10616_3.00:ATF2:CREB5	ATGACGTCAYYN	0.1	-3.005	0.3444	6	10.71%	595.2	4.74%
M06754_3.00:HHEX	TTTAATTA	0.1	-3.002	0.3452	8	14.29%	914	7.28%
M04495_3.00:ATF3:JDP2	NRTGASTCAYN	0.1	-2.999	0.346	6	10.71%	596.1	4.75%
M08792_3.00:ZFP57	TGCGGCA	0.1	-2.996	0.3468	4	7.14%	309.5	2.47%
M04349_3.00:MSGN1	NRMCATATGGYN	0.1	-2.992	0.3477	6	10.71%	597.9	4.76%
M00377_3.00:NKX2-1:NKX2-2:NKX2-3:NKX2-4:NKX2-5:NKX2-6:NKX2-8	NNNGNNN	0.1	-2.986	0.3497	56	100.00%	11896.7	94.80%
M04348_3.00:MSGN1	NRMCATATGGYN	0.1	-2.985	0.3497	6	10.71%	598.1	4.77%
M11849_3.00:CDX1:CDX2:CDX4	DYYATAAAWWNHHW	0.1	-2.985	0.3497	6	10.71%	598.8	4.77%
M05238_3.00:MEIS1:MEIS2:MEIS3:PKNOX1:PKNOX2:TGIF1:TGIF2:TGIF2LX:TGIF2LY	VCTGTCAH	0.1	-2.982	0.3499	28	50.00%	4812.2	38.35%
M05239_3.00:MEIS1:MEIS2:MEIS3:PKNOX1:PKNOX2:TGIF1:TGIF2:TGIF2LX:TGIF2LY	VCTGTCAH	0.1	-2.982	0.3499	28	50.00%	4812.2	38.35%
M00483_3.00:CRX:DMBX1:DPRX:GSC:GSC2:OTX1:OTX2:PITX1:PITX2:PITX3:TPRX1	NTAATCCB	0.1	-2.98	0.3503	20	35.71%	3149.4	25.10%
M10397_3.00:NR2C1:NR2C2:NR2F1:NR2F2:NR2F6:NR4A1:NR4A2:NR4A3:PPARD:PPARG:RARA:RARB:RARG:RORA:RORB:RORC:RXRA:RXRB:RXRG	AAAGGTCAV	0.1	-2.974	0.3521	12	21.43%	1616.2	12.88%
M00222_3.00:GATA1:GATA2:GATA3:GATA4:GATA5:GATA6	NNHGATAAV	0.1	-2.968	0.3538	24	42.86%	3971.9	31.65%
M03319_3.00:CDX1:CDX2:CDX4	TTTTATKRC	0.1	-2.966	0.3544	6	10.71%	601.3	4.79%
M11001_3.00:NHLH1:NHLH2	GCACARATG	0.1	-2.965	0.3544	24	42.86%	3972.3	31.65%
M04340_3.00:ASCL1:ASCL2	DGCAGCTGCY	0.1	-2.964	0.3544	10	17.86%	1262.4	10.06%
M06005_3.00:TBX2:TBX3:TBX4:TBX5	RAGGTGTGAN	0.1	-2.962	0.3547	16	28.57%	2368.6	18.87%
M01570_3.00:ELF1:ELF2:ELF4:SPDEF	NAVCCGGATN	0.1	-2.956	0.3568	16	28.57%	2370.7	18.89%
M00425_3.00:NR2E3	NNNARATATCAAN	0.1	-2.953	0.3576	6	10.71%	603.4	4.81%
M08494_3.00:ZNF426	GGCGACAG	0.1	-2.941	0.3615	22	39.29%	3568.1	28.43%
M00489_3.00:ALX1:ALX3:ALX4:ARX:DRGX:EN1:EN2:ESX1:ISX:LHX2:LHX3:LHX4:LHX6:LHX8:LHX9:LMX1A:LMX1B:MIXL1:OTP:PHOX2A:PHOX2B:PROP1:PRRX1:PRRX2:RAX:RAX2:SEBOX:SHOX:SHOX2:UNCX:VSX1:VSX2:ZFHX2	YTRATTAV	0.1	-2.939	0.3618	16	28.57%	2375.4	18.93%
M10802_3.00:HOXA3:HOXA4:HOXA5:HOXA6:HOXA7:HOXB3:HOXB4:HOXB5:HOXB6:HOXB7:HOXB8:HOXC4:HOXC5:HOXC6:HOXC8:HOXD3:HOXD4:HOXD8:PDX1	TTAATGRCM	0.1	-2.934	0.3635	8	14.29%	927.9	7.39%
M04741_3.00:KLF13:KLF9	RGKGGGCGTGGYN	0.1	-2.92	0.3684	4	7.14%	317.1	2.53%
M00218_3.00:FOXI1:FOXJ3:FOXK1:FOXK2	TTGTTTAC	0.1	-2.916	0.3696	10	17.86%	1273.7	10.15%
M12446_3.00:SOX1:SOX10:SOX11:SOX12:SOX13:SOX14:SOX15:SOX17:SOX18:SOX2:SOX21:SOX3:SOX30:SOX4:SOX5:SOX6:SOX7:SOX8:SOX9:SRY	AACAAT	0.1	-2.913	0.3702	14	25.00%	2002	15.95%
M10931_3.00:HIF1A	BGCACGTVS	0.1	-2.911	0.3706	12	21.43%	1632.5	13.01%
M10770_3.00:EOMES:TBR1:TBX21:TBX5	AGGTGTTAAT	0.1	-2.911	0.3706	4	7.14%	318.8	2.54%
M06769_3.00:BARHL1:BARHL2:HOXA6:HOXB6:HOXB8:HOXC6:HOXC8:HOXD8:NKX1-1:NKX1-2	TTTAATTG	0.1	-2.907	0.3717	10	17.86%	1275.9	10.17%
M02337_3.00:IRF7	GAARCGAAAR	0.1	-2.902	0.373	10	17.86%	1276.8	10.17%
M03061_3.00:MAF:MAFA:MAFB:MAFG:MAFK	GTCAGCAWWWTT	0.1	-2.901	0.3731	4	7.14%	319.6	2.55%
M09986_3.00:MZF1	RRAGGGGAWTKGR	0.1	-2.889	0.3773	10	17.86%	1280	10.20%
M00221_3.00:GATA1:GATA2:GATA3:GATA4:GATA5:GATA6	NNNAGATAAN	0.1	-2.885	0.3785	30	53.57%	5284.2	42.11%
M00861_3.00:FOXI1:FOXI2:FOXI3:FOXJ1:FOXJ2:FOXJ3:FOXK2:FOXP3	NDTGTTTAY	0.1	-2.884	0.3789	18	32.14%	2783.2	22.18%
M05394_3.00:BARX1:BARX2:BSX:EMX1:EMX2:EN1:EN2:EVX1:EVX2:GBX1:GBX2:GSX1:GSX2:HMX1:HMX2:HMX3:HOXA1:HOXA2:HOXA3:HOXA4:HOXA5:HOXB1:HOXB2:HOXB3:HOXB4:HOXB5:HOXC4:HOXC5:HOXD1:HOXD3:HOXD4:LBX2:MEOX1:MEOX2:MNX1:NANOG:NANOGP8:NKX1-1:NKX1-2:PDX1:TLX2:VENTX	RCTAATTRSN	0.1	-2.873	0.3828	8	14.29%	939.1	7.48%
M02917_3.00:SOX1:SOX10:SOX11:SOX12:SOX13:SOX14:SOX15:SOX17:SOX18:SOX2:SOX21:SOX3:SOX30:SOX4:SOX5:SOX6:SOX7:SOX8:SOX9:SRY	ATTGTTT	0.1	-2.865	0.3854	16	28.57%	2398.7	19.11%
M09408_3.00:ZNF200	SVVRCCGGAAGY	0.1	-2.865	0.3854	4	7.14%	323.2	2.58%
M01884_3.00:XBP1	HYACGTNDN	0.1	-2.856	0.3881	26	46.43%	4434.6	35.34%
M01582_3.00:CUX1:CUX2	TKATCGRYW	0.1	-2.851	0.39	10	17.86%	1288.5	10.27%
M06099_3.00:MYT1:MYT1L:ST18	NAACTTTNNNNN	0.1	-2.847	0.3912	20	35.71%	3195.2	25.46%
M02252_3.00:ALX1:ALX3:ALX4:ARX:BARHL1:BARHL2:BSX:DLX1:DLX2:DLX3:DLX4:DLX5:DLX6:DRGX:EN1:EN2:ESX1:GBX1:GBX2:HESX1:HOXA2:HOXB2:ISX:LBX1:LBX2:LHX1:LHX2:LHX3:LHX4:LHX5:LHX9:MEOX1:MIXL1:MNX1:MSX1:MSX2:NANOG:NANOGP8:NOBOX:OTP:PHOX2A:PHOX2B:PROP1:PRRX1:PRRX2:RAX:RAX2:SEBOX:SHOX:SHOX2:UNCX:VSX1:VSX2	TTAATTAG	0.1	-2.847	0.3912	4	7.14%	325.6	2.59%
M08261_3.00:MYC	CACGTGSH	0.1	-2.846	0.3912	12	21.43%	1649.1	13.14%
M10654_3.00:ELF1:ELF2:ELF4:ELK1:ELK3:ELK4:ERF:ERG:ETS1:ETS2:ETV1:ETV2:ETV3:ETV3L:ETV4:ETV5:FEV:FLI1:GABPA	RCCGGAAGTD	0.1	-2.844	0.3914	6	10.71%	620	4.94%
M02542_3.00:GMEB1:GMEB2	NNKACGTVN	0.1	-2.807	0.4057	38	67.86%	7122	56.75%
M11921_3.00:ISL1:ISL2:NOTO:SHOX:SHOX2:VSX1	YCATTAG	0.1	-2.803	0.4072	8	14.29%	953.3	7.60%
M03096_3.00:ZNF740	GTGGGGGGGG	0.1	-2.802	0.4072	4	7.14%	330.7	2.63%
M04863_3.00:MBNL2	WYGCYTYGCTTC	0.1	-2.802	0.4072	4	7.14%	330.7	2.64%
M11349_3.00:ZIC1:ZIC2:ZIC3:ZIC4:ZIC5	KGGGTGGTC	0.1	-2.8	0.4074	10	17.86%	1300.9	10.37%
M08518_3.00:ZNF24	AATGAATG	0.1	-2.794	0.4094	6	10.71%	628	5.00%
M06664_3.00:SIX1:SIX2:SIX4:SIX5	ARTGATA	0.1	-2.787	0.412	10	17.86%	1303.6	10.39%
M03791_3.00:TFAP2A:TFAP2B:TFAP2E	WGCCTSAGGCW	0.1	-2.782	0.4135	6	10.71%	630.2	5.02%
M12476_3.00:STAT1	TTCYRGGAAR	0.1	-2.782	0.4135	6	10.71%	630.9	5.03%
M00381_3.00:SIX3:SIX6	NTGATAY	0.1	-2.771	0.4175	30	53.57%	5331.9	42.49%
M04986_3.00:ELF1:ELF2:ELF4:ELK1:ELK3:ELK4:ERF:ERG:ETS1:ETS2:ETV1:ETV2:ETV3:ETV3L:ETV4:ETV5:FEV:FLI1:GABPA	NACCGGAAGYN	0.1	-2.766	0.4193	10	17.86%	1308.2	10.42%
M01329_3.00:DUXA	RYCAATCAD	0.1	-2.762	0.4207	10	17.86%	1309.4	10.43%
M05528_3.00:ALX1:ALX3:ALX4:ARX:BARHL1:BARHL2:DRGX:ESX1:GBX1:GBX2:HESX1:HMX1:HMX2:HMX3:ISX:LBX1:LBX2:MEOX1:MEOX2:MIXL1:MSX1:MSX2:PHOX2A:PHOX2B:PROP1:PRRX1:PRRX2:RAX:RAX2:SHOX:SHOX2:TLX2:UNCX:VENTX:VSX1:VSX2	TTAACGAG	0.1	-2.758	0.422	4	7.14%	335.1	2.67%
M03788_3.00:TFAP2A:TFAP2B:TFAP2E	HGCCTSAGGCD	0.1	-2.757	0.422	6	10.71%	634.1	5.05%
M06600_3.00:GATA1:GATA2:GATA3:GATA4:GATA5:GATA6	CAGATAA	0.1	-2.75	0.425	10	17.86%	1312	10.46%
M05511_3.00:ALX1:ALX3:ALX4:ARX:BARX1:BARX2:BSX:DLX1:DLX2:DLX3:DLX4:DLX5:DLX6:DRGX:EN1:EN2:ESX1:GBX1:GBX2:GSX1:GSX2:HESX1:HOXA1:HOXA2:HOXA3:HOXA4:HOXA5:HOXB1:HOXB2:HOXB3:HOXB4:HOXB5:HOXC4:HOXC5:HOXD3:HOXD4:ISX:LBX2:LHX1:LHX2:LHX3:LHX4:LHX5:LHX6:LHX8:LHX9:LMX1A:LMX1B:MEOX1:MIXL1:MNX1:MSX1:MSX2:NKX1-1:NKX1-2:NOBOX:NOTO:OTP:PDX1:PHOX2A:PHOX2B:PROP1:PRRX1:PRRX2:RAX:RAX2:SEBOX:SHOX:SHOX2:UNCX:VAX1:VAX2…	YTAATTAG	0.1	-2.75	0.425	4	7.14%	336.2	2.68%
M10088_3.00:KLF1:KLF12:KLF2:KLF3:KLF4:KLF5:KLF6:KLF7:KLF8	GGGGCWGGGYGGGGC	0.1	-2.75	0.425	4	7.14%	336.2	2.68%
M11581_3.00:E2F1:E2F2:E2F3:E2F4:E2F5:E2F6	GGCGSGAAAD	0.1	-2.75	0.425	4	7.14%	336.9	2.69%
M09990_3.00:KLF1:KLF12:KLF3:KLF5:KLF8	CAGGGGGTG	0.1	-2.744	0.4257	8	14.29%	965.7	7.70%
M10123_3.00:KLF1:KLF12:KLF3:KLF5:KLF8	CAGGGGGTG	0.1	-2.744	0.4257	8	14.29%	965.7	7.70%
M09414_3.00:ZNF37A	GGAGGGAGR	0.1	-2.741	0.4266	34	60.71%	6233.6	49.67%
M11662_3.00:FOXO1:FOXO3:FOXO4:FOXO6:FOXP4	AAARTAAACAADH	0.1	-2.739	0.427	6	10.71%	637.6	5.08%
M11672_3.00:FOXO1:FOXO3:FOXO4:FOXO6	MATAAACAAN	0.1	-2.737	0.4276	10	17.86%	1315.5	10.48%
M02793_3.00:EHF:ELF1:ELF2:ELF3:ELF4:ELF5:ETV6:ETV7:SPIC	GCGGAAGTG	0.1	-2.733	0.4289	6	10.71%	638.1	5.08%
M00243_3.00:RFX1:RFX2:RFX3:RFX4:RFX6	BGTTRCYANG	0.1	-2.731	0.4296	12	21.43%	1680.4	13.39%
M10620_3.00:MAF:MAFA:MAFB:MAFG:MAFK:NRL	TGAGTCAGCA	0.1	-2.724	0.432	4	7.14%	339.1	2.70%
M12525_3.00:TEAD3:TEAD4	AAAMATWCCWCA	0.1	-2.724	0.432	4	7.14%	339.8	2.71%
M00568_3.00:PBX1:PBX2:PBX3:PBX4	BNYRTCAHN	0.1	-2.723	0.432	56	100.00%	11952	95.24%
M06212_3.00:ZFPM1	NAGATAASN	0.1	-2.721	0.4327	10	17.86%	1319.7	10.52%
M08984_3.00:PRDM1	GTGAAAGT	0.1	-2.715	0.4348	8	14.29%	971.5	7.74%
M11987_3.00:HSF1:HSF2:HSF4	GAANHTTCTRGA	0.1	-2.709	0.4369	6	10.71%	642.5	5.12%
M11899_3.00:ALX1:ALX3:ALX4:ARX:BARX1:BARX2:BSX:DLX2:DLX3:DRGX:EMX1:EMX2:EN1:EN2:ESX1:EVX1:EVX2:GBX1:GBX2:GSX1:GSX2:HESX1:HOXA2:HOXA3:HOXB2:HOXB3:HOXD3:ISX:LBX1:LBX2:LHX1:LHX2:LHX3:LHX4:LHX5:LHX6:LHX8:LHX9:LMX1A:LMX1B:MEOX1:MIXL1:MNX1:MSX1:MSX2:NKX1-1:NKX1-2:NOBOX:NOTO:OTP:PDX1:PHOX2A:PHOX2B:PROP1:PRRX1:PRRX2:RAX:RAX2:SEBOX:SHOX:SHOX2:UNCX:VAX1:VAX2:VSX1:VSX2:ZFHX2	TYAWAKTAA	0.1	-2.709	0.437	10	17.86%	1322.1	10.54%
M08622_3.00:RELA	GGGAAATTCCM	0.1	-2.707	0.437	4	7.14%	342	2.73%
M08831_3.00:TFDP1:TFDP2:TFDP3	SGCGGGAA	0.1	-2.707	0.437	4	7.14%	341.8	2.72%
M06700_3.00:ALX1:ALX3:ALX4:ARX:DRGX:EN1:EN2:ESX1:ISX:LHX2:LHX3:LHX4:LHX6:LHX8:LHX9:LMX1A:LMX1B:MIXL1:NOBOX:OTP:PHOX2A:PHOX2B:PROP1:PRRX1:PRRX2:RAX:RAX2:SEBOX:SHOX:SHOX2:UNCX:VSX1:VSX2:ZFHX2	YTAATTA	0.1	-2.706	0.4372	8	14.29%	973.7	7.76%
M05568_3.00:PBX1:PBX2:PBX3:PBX4	TTGATTGATG	0.1	-2.704	0.4375	6	10.71%	643.8	5.13%
M05880_3.00:ESR1:ESR2:ESRRA:ESRRB:ESRRG	BTCAAGGTCAH	0.1	-2.704	0.4375	6	10.71%	643.8	5.13%
M11947_3.00:POU1F1	ATTTATTCAT	0.1	-2.699	0.4393	4	7.14%	342.4	2.73%
M04319_3.00:MAX	RCCATGTGMT	0.1	-2.677	0.4487	12	21.43%	1695.6	13.51%
M04590_3.00:ZNF263	VGGGAGCACB	0.1	-2.674	0.4495	6	10.71%	648.5	5.17%
M12365_3.00:RELA	NGGGAAAKTCCC	0.1	-2.673	0.4495	4	7.14%	345.7	2.75%
M00899_3.00:SOX1:SOX10:SOX11:SOX12:SOX13:SOX14:SOX15:SOX17:SOX18:SOX2:SOX21:SOX3:SOX30:SOX4:SOX5:SOX6:SOX7:SOX8:SOX9:SRY	ATTGTTHNN	0.1	-2.667	0.4522	20	35.71%	3260.9	25.99%
M00870_3.00:GATA1:GATA2:GATA3:GATA4:GATA5:GATA6	NWGATAASN	0.1	-2.659	0.4555	20	35.71%	3263.8	26.01%
M01817_3.00:CLOCK	NVCACGTGBN	0.1	-2.652	0.4583	12	21.43%	1702.2	13.56%
M00188_3.00:SP1:SP3:SP4:SP5:SP8:SP9	DGGGGGCGKG	0.1	-2.647	0.4599	16	28.57%	2468	19.67%
M09855_3.00:ARNT:ARNT2	GGCACGTAS	0.1	-2.645	0.4603	6	10.71%	653.2	5.21%
M10244_3.00:GATA1:GATA2:GATA3:GATA4:GATA5:GATA6	DSAGATAAGRR	0.1	-2.645	0.4603	6	10.71%	653.2	5.21%
M02070_3.00:FOXC1:FOXI1:FOXI3:FOXJ3:FOXK1:FOXK2:FOXP2:FOXP4	DTGTTTAYNN	0.1	-2.624	0.4696	18	32.14%	2872.1	22.89%
M11969_3.00:POU3F2	TWAAYAAA	0.1	-2.624	0.4696	26	46.43%	4528.3	36.08%
M11111_3.00:FOS:FOSB:FOSL1:FOSL2	NTGAGTCASN	0.1	-2.62	0.4708	10	17.86%	1344.5	10.71%
M09342_3.00:ZNF43	AAVAAAWAAAMAAKMAATTYAR	0.1	-2.616	0.4724	4	7.14%	352.4	2.81%
M04959_3.00:ELF1:ELF2:ELF4:ELK1:ELK3:ELK4:ERF:ERG:ETS1:ETS2:ETV1:ETV2:ETV3:ETV3L:ETV4:ETV5:FEV:FLI1:GABPA	NRSCGGAAGTR	0.1	-2.608	0.4757	10	17.86%	1347.8	10.74%
M02210_3.00:DBX1:DBX2:HLX	ATTAATTA	0.1	-2.608	0.4757	4	7.14%	353.4	2.82%
M08217_3.00:ZNF503:ZNF703	CHCAGCAGGGG	0.1	-2.607	0.4757	8	14.29%	994.8	7.93%
M08225_3.00:ZNF503:ZNF703	CATAAAWA	0.1	-2.603	0.4772	8	14.29%	995.7	7.93%
M08154_3.00:ZNF823	GGAGAVAGAGAAARR	0.1	-2.6	0.4782	4	7.14%	354.8	2.83%
M00901_3.00:TBX2:TBX3:TBX4:TBX5	DAGGTGTBAA	0.1	-2.597	0.4794	16	28.57%	2485.2	19.80%
M00827_3.00:NHLH1:NHLH2	NGCAGCTGTN	0.1	-2.596	0.4794	10	17.86%	1350.7	10.76%
M11884_3.00:CDX1:CDX2:CDX4:NKX2-6	ATTTATG	0.1	-2.59	0.4818	22	39.29%	3700.5	29.49%
M09486_3.00:ZBTB42	CACAKCTGG	0.1	-2.589	0.482	8	14.29%	999	7.96%
M04342_3.00:TCF12:TCF3:TCF4	VCACCTGC	0.1	-2.588	0.4822	26	46.43%	4543.9	36.21%
M02323_3.00:POU2F2:POU5F1B	CTAATTAA	0.1	-2.584	0.4837	4	7.14%	356.7	2.84%
M01379_3.00:ESR1:ESR2:ESRRA:ESRRB:ESRRG:NR1H2:NR1H3:NR2C2:NR2F1:NR2F2:NR2F6:RARA:RARB:RARG:RORA:RORB:RORC	NNRGGTCAH	0.1	-2.577	0.4865	22	39.29%	3705.4	29.53%
M05119_3.00:ALX1:ALX3:ALX4:ARX:BARHL1:BARHL2:BARX1:BARX2:BSX:DLX1:DLX2:DLX3:DLX4:DLX5:DLX6:DRGX:EMX1:EMX2:EN1:EN2:ESX1:EVX1:EVX2:GBX1:GBX2:GSX1:GSX2:HOXA1:HOXA2:HOXA3:HOXA4:HOXA5:HOXB1:HOXB2:HOXB3:HOXB4:HOXB5:HOXC4:HOXC5:HOXD1:HOXD3:HOXD4:ISX:MEOX1:MEOX2:MIXL1:MNX1:MSX1:MSX2:NANOG:NANOGP8:NKX1-1:NKX1-2:OTP:PDX1:PHOX2A:PHOX2B:PROP1:PRRX1:PRRX2:RAX:RAX2:SEBOX:SHOX:SHOX2:UNCX:VAX1:VAX2:VENTX:VSX1:VS…	NTAATGGTTTTN	0.1	-2.576	0.4868	4	7.14%	357.9	2.85%
M10797_3.00:CDX1:CDX2:CDX4:HOXA13:HOXC13	TTTTATGRYY	0.1	-2.571	0.489	6	10.71%	666.9	5.31%
M11236_3.00:KLF1:KLF12:KLF2:KLF3:KLF4:KLF5:KLF6:KLF7	VHGGGKS	0.1	-2.569	0.4894	56	100.00%	11985.7	95.51%
M04334_3.00:CLOCK	RACATGYGTN	0.1	-2.567	0.4899	12	21.43%	1726.2	13.76%
M04511_3.00:BATF:BATF3	CGTGTCATKC	0.1	-2.56	0.4934	6	10.71%	668.8	5.33%
M09724_3.00:RFX1:RFX2:RFX3:RFX4	GGTTGCYA	0.1	-2.554	0.4958	6	10.71%	669.3	5.33%
M10756_3.00:RUNX1:RUNX2:RUNX3	CTGTGGTTTS	0.1	-2.552	0.4962	4	7.14%	360	2.87%
M04614_3.00:KLF1:KLF12:KLF2:KLF3:KLF4:KLF5:KLF6:KLF7:KLF8	DGGGYGTGGB	0.1	-2.552	0.4962	18	32.14%	2898.9	23.10%
M02282_3.00:ALX1:ALX3:ALX4:ARX:DRGX:EMX1:EMX2:EN1:EN2:ESX1:EVX1:EVX2:GBX1:GBX2:HESX1:HOXA2:HOXB2:ISX:LBX1:LBX2:LHX1:LHX2:LHX3:LHX4:LHX5:LHX9:LMX1A:LMX1B:MEOX2:MIXL1:MNX1:MSX1:MSX2:NKX1-1:NKX1-2:OTP:PHOX2A:PHOX2B:PROP1:PRRX1:PRRX2:RAX:RAX2:SEBOX:SHOX:SHOX2:UNCX:VSX1:VSX2	CTAATTAA	0.1	-2.544	0.4994	4	7.14%	361.4	2.88%
M00449_3.00:HOXA13:HOXB13:HOXC13:HOXD13	WTTTAYDRS	0.1	-2.538	0.5022	18	32.14%	2903.7	23.14%
M00258_3.00:SOX1:SOX10:SOX11:SOX12:SOX13:SOX14:SOX15:SOX17:SOX18:SOX2:SOX21:SOX3:SOX30:SOX4:SOX5:SOX6:SOX7:SOX8:SOX9:SRY	ATTGTTHN	0.1	-2.531	0.5052	20	35.71%	3312	26.39%
M00296_3.00:KLF10:KLF11	GGGGGCGG	0.1	-2.53	0.5053	10	17.86%	1368	10.90%
M11951_3.00:POU2F1	NDSRTAATSABDW	0.1	-2.526	0.507	6	10.71%	674.1	5.37%
M05584_3.00:ALX1:ALX3:ALX4:ARX:BARHL1:BARHL2:BARX1:BARX2:BSX:DLX1:DLX2:DLX3:DLX4:DLX5:DLX6:DRGX:EMX1:EMX2:EN1:EN2:ESX1:EVX1:EVX2:GBX1:GBX2:GSX1:GSX2:HMX1:HMX2:HMX3:HOXA1:HOXA2:HOXA3:HOXA4:HOXA5:HOXB1:HOXB2:HOXB3:HOXB4:HOXB5:HOXC4:HOXC5:HOXD1:HOXD3:HOXD4:ISX:MEOX1:MEOX2:MIXL1:MNX1:MSX1:MSX2:NANOG:NANOGP8:NKX1-1:NKX1-2:PDX1:PHOX2A:PHOX2B:PROP1:PRRX1:PRRX2:RAX:RAX2:SEBOX:SHOX:SHOX2:UNCX:VAX1:VAX2:VE…	NTAATTGV	0.1	-2.526	0.507	14	25.00%	2119.8	16.89%
M00421_3.00:POU3F4	YKMATWA	0.1	-2.521	0.5089	38	67.86%	7246	57.74%
M01810_3.00:MITF:TFEB	GTCACGTG	0.1	-2.521	0.5089	6	10.71%	675.1	5.38%
M11306_3.00:BCL6	WCCTAGAAMC	0.1	-2.521	0.5089	6	10.71%	675.4	5.38%
M08661_3.00:HAND2	CAGATG	0.1	-2.516	0.5104	12	21.43%	1741.9	13.88%
M01324_3.00:ISL1:ISL2:NOTO:SHOX:SHOX2:VSX1	TCTTAATTGMH	0.1	-2.513	0.5113	4	7.14%	365.1	2.91%
M11257_3.00:MZF1	KGGBGAGGGGGAA	0.1	-2.51	0.5128	6	10.71%	677.9	5.40%
M01328_3.00:HDX	NVAATCA	0.1	-2.488	0.5238	42	75.00%	8205.2	65.38%
M03525_3.00:POU3F3	ATRAATAWKCAW	0.1	-2.483	0.5256	4	7.14%	369.8	2.95%
M09412_3.00:PRDM6	RAAAGDAAAAAAAVAAAAAAA	0.1	-2.483	0.5256	4	7.14%	369.1	2.94%
M11364_3.00:KLF15	GAGBNGGGGMGTDG	0.1	-2.477	0.5282	6	10.71%	683.2	5.44%
M04912_3.00:ELF1:ELF2:ELF4:ELK1:ELK3:ELK4:ERF:ERG:ETS1:ETS2:ETV1:ETV2:ETV3:ETV3L:ETV4:ETV5:FEV:FLI1:GABPA	NRCCGGAWGYN	0.1	-2.472	0.5306	6	10.71%	684.3	5.45%
M08747_3.00:CTCFL	CAGGGGGC	0.1	-2.464	0.5342	8	14.29%	1026.3	8.18%
M06203_3.00:DACH2	ATGACRAWTG	0.1	-2.461	0.5356	6	10.71%	686.1	5.47%
M04482_3.00:MAF:MAFA:MAFB:NRL	YGTCAGCANWWTN	0.1	-2.46	0.5356	4	7.14%	372.1	2.96%
M10961_3.00:MYF5:MYOD1:MYOG	CAMCACCTGTYS	0.1	-2.46	0.5356	4	7.14%	372.4	2.97%
M04547_3.00:MAF:MAFA:MAFB:MAFG:MAFK:NRL	YGTCAGCAN	0.1	-2.455	0.5377	10	17.86%	1387.9	11.06%
M10220_3.00:FOXO4	TTGTTTAYT	0.1	-2.45	0.5389	6	10.71%	688.4	5.49%
M10230_3.00:FOXO1:FOXO3:FOXO4:FOXO6	TTGTTTAYT	0.1	-2.45	0.5389	6	10.71%	688.4	5.49%
M11626_3.00:ELF1:ELF2:ELF4:ELK1:ELK3:ELK4:ERF:ERG:ETS1:ETS2:ETV1:ETV2:ETV3:ETV3L:ETV4:ETV5:FEV:FLI1:GABPA	CMGGAAGTSAB	0.1	-2.45	0.5389	6	10.71%	688.5	5.49%
M10983_3.00:TCF12:TCF3:TCF4	CAGGTGY	0.1	-2.444	0.5422	22	39.29%	3759.7	29.96%
M00235_3.00:MYB:MYBL1	YAACGGHYN	0.1	-2.429	0.5497	6	10.71%	692.1	5.51%
M06220_3.00:MITF:TFE3:TFEB:TFEC	GTCACGTG	0.1	-2.424	0.5522	6	10.71%	694	5.53%
M01341_3.00:MSANTD3	GTGAGTGBAC	0.1	-2.419	0.5547	6	10.71%	694.8	5.54%
M06386_3.00:PTF1A	TGWCAGGTGTT	0.1	-2.413	0.5572	6	10.71%	695.2	5.54%
M09004_3.00:BARX1:BARX2:BSX:EMX1:EMX2:EN1:EN2:EVX1:EVX2:GBX1:GBX2:GSX1:GSX2:HMX1:HMX2:HMX3:HOXA1:HOXA2:HOXA3:HOXA4:HOXA5:HOXA7:HOXB1:HOXB2:HOXB3:HOXB4:HOXB5:HOXB7:HOXC4:HOXC5:HOXD1:HOXD3:HOXD4:MEOX1:MEOX2:MNX1:NANOG:NANOGP8:NKX1-1:NKX1-2:NOTO:OTP:PDX1:TLX2:VAX1:VAX2:VENTX	GATTGATG	0.1	-2.403	0.5627	6	10.71%	697.8	5.56%
M11230_3.00:ZIC1:ZIC2:ZIC3:ZIC4	KGGGTGGTC	0.1	-2.396	0.5662	10	17.86%	1403	11.18%
M11319_3.00:EGR1:EGR2:EGR3:EGR4	GCGGGGGCGG	0.1	-2.394	0.5669	4	7.14%	381.5	3.04%
M08134_3.00:ZNF585A	GAGWACAGA	0.1	-2.377	0.5762	6	10.71%	702.3	5.60%
M02925_3.00:TBX2:TBX3:TBX4:TBX5	AGGTGTGAA	0.1	-2.372	0.5784	4	7.14%	385	3.07%
M00172_3.00:ASCL1:ASCL2	NVCAGCTGBN	0.1	-2.371	0.5784	22	39.29%	3789.6	30.20%
M05515_3.00:HOXA10:HOXA4:HOXA5:HOXA6:HOXA7:HOXA9:HOXB4:HOXB5:HOXB6:HOXB7:HOXB8:HOXB9:HOXC10:HOXC4:HOXC5:HOXC6:HOXC8:HOXC9:HOXD10:HOXD4:HOXD8:HOXD9:MNX1:PDX1	BTAATKGC	0.1	-2.371	0.5784	14	25.00%	2170.4	17.30%
M02936_3.00:GLI1:GLI2:GLI3	GTGGGTGGTC	0.1	-2.365	0.5813	4	7.14%	385.2	3.07%
M02942_3.00:GATA1:GATA2:GATA3:GATA4:GATA5:GATA6	GATAAGAT	0.1	-2.363	0.582	10	17.86%	1412.2	11.25%
M08500_3.00:ZNF362	AAAAAAAAAAAAAAAAAAAAA	0.1	-2.358	0.5846	4	7.14%	386.1	3.08%
M01738_3.00:ARID3A:ARID3B:ARID3C	NNTTTRATHN	0.1	-2.351	0.5884	24	42.86%	4219.8	33.63%
M11767_3.00:HOXA10:HOXA11:HOXA5:HOXA6:HOXA7:HOXA9:HOXB5:HOXB6:HOXB8:HOXB9:HOXC10:HOXC11:HOXC5:HOXC6:HOXC8:HOXC9:HOXD10:HOXD11:HOXD8:HOXD9	TTTAWTTAAB	0.1	-2.35	0.5887	8	14.29%	1053	8.39%
M01800_3.00:TWIST1:TWIST2	NCCATATGTK	0.1	-2.346	0.5903	6	10.71%	708.2	5.64%
M08604_3.00:KLF1:KLF12:KLF2:KLF3:KLF4:KLF5:KLF6:KLF7	WGGGTGKGGCY	0.1	-2.342	0.5925	10	17.86%	1418	11.30%
M05086_3.00:GCM1:GCM2	TACCCGCAT	0.1	-2.338	0.5942	10	17.86%	1419.1	11.31%
M11635_3.00:ELF1:ELF2:ELF4:ELK1:ELK3:ELK4:ERF:ERG:ETS1:ETS2:ETV1:ETV2:ETV3:ETV3L:ETV4:ETV5:FEV:FLI1:GABPA	CAGGAAG	0.1	-2.33	0.5984	38	67.86%	7334.9	58.45%
M00506_3.00:DBX1:DBX2:HLX	ATTAATTA	0.1	-2.33	0.5984	4	7.14%	390.9	3.12%
M11633_3.00:ELF1:ELF2:ELF4:ELK1:ELK3:ELK4:ERF:ERG:ETS1:ETS2:ETV1:ETV2:ETV3:ETV3L:ETV4:ETV5:FEV:FLI1:GABPA	MCAGGAAA	0.1	-2.324	0.6011	22	39.29%	3809.4	30.36%
M03794_3.00:ARID3A:ARID3B:ARID3C	HRATTAATYD	0.1	-2.323	0.6016	4	7.14%	392	3.12%
M05475_3.00:ALX1:ALX3:ALX4:ARX:BARX1:BARX2:BSX:DLX1:DLX2:DLX3:DLX4:DLX5:DLX6:DRGX:EMX1:EMX2:EN1:EN2:ESX1:EVX1:EVX2:GBX1:GBX2:GSX1:GSX2:HMX1:HMX3:HOXA1:HOXA2:HOXA3:HOXA4:HOXA5:HOXB1:HOXB2:HOXB3:HOXB4:HOXB5:HOXC4:HOXC5:HOXD1:HOXD3:HOXD4:ISX:LHX3:LHX4:MEOX1:MIXL1:MNX1:MSX1:MSX2:NKX1-1:NKX1-2:NOTO:OTP:PDX1:PHOX2A:PHOX2B:PROP1:PRRX1:PRRX2:RAX:RAX2:SEBOX:SHOX:SHOX2:UNCX:VAX1:VAX2:VENTX:VSX1:VSX2	YTAATKAM	0.1	-2.322	0.6016	20	35.71%	3394.8	27.05%
M02490_3.00:HNF4A:HNF4G:NR2E1	TGAGGTCAATNN	0.1	-2.316	0.605	12	21.43%	1802.2	14.36%
M04422_3.00:HES5	VCACACKT	0.1	-2.31	0.6079	22	39.29%	3815.9	30.41%
M10688_3.00:BARHL1:BARHL2:BARX1:BARX2:BSX:DLX1:DLX2:DLX3:DLX4:DLX5:DLX6:EVX1:EVX2:GBX1:GBX2:HMX2:HOXA1:HOXA2:HOXA3:HOXB1:HOXB2:HOXB3:HOXD1:HOXD3:MEOX1:MEOX2:MNX1:MSX1:MSX2:NANOG:NANOGP8:PDX1:VENTX	GTTAATGGCY	1	-2.301	0.6132	6	10.71%	717.2	5.71%
M11835_3.00:MEIS1:MEIS2:MEIS3:PKNOX1:PKNOX2:TGIF1:TGIF2:TGIF2LX:TGIF2LY	YATCTRTCAVYC	1	-2.296	0.6159	6	10.71%	718.9	5.73%
M00869_3.00:FOXO1:FOXO3:FOXO4:FOXO6:FOXP4	NTGTTKWYNN	1	-2.291	0.6184	28	50.00%	5106.6	40.69%
M05508_3.00:ALX1:ALX3:ALX4:ARX:BARX1:BARX2:BSX:DLX1:DLX2:DLX3:DLX4:DLX5:DLX6:DRGX:EN1:EN2:ESX1:GBX1:GBX2:GSX1:GSX2:HESX1:HOXA1:HOXA2:HOXA3:HOXA4:HOXA5:HOXB1:HOXB2:HOXB3:HOXB4:HOXB5:HOXC4:HOXC5:HOXD3:HOXD4:ISX:LBX2:LHX1:LHX2:LHX3:LHX4:LHX5:LHX6:LHX8:LHX9:LMX1A:LMX1B:MEOX1:MIXL1:MNX1:MSX1:MSX2:NKX1-1:NKX1-2:NOBOX:NOTO:OTP:PDX1:PHOX2A:PHOX2B:PROP1:PRRX1:PRRX2:RAX:RAX2:SEBOX:SHOX:SHOX2:UNCX:VAX1:VAX2…	CTAATTAA	1	-2.288	0.6196	4	7.14%	396.7	3.16%
M03294_3.00:RHOXF1	NTRATCCN	1	-2.285	0.6214	36	64.29%	6896	54.95%
M02365_3.00:SRF	CCNDATTTGG	1	-2.278	0.625	10	17.86%	1436.8	11.45%
M11351_3.00:KLF10:KLF11	GGSGGTGBAV	1	-2.276	0.6259	28	50.00%	5113.9	40.75%
M10798_3.00:BARX1:BARX2:BSX:EMX1:EMX2:EN1:EN2:EVX1:EVX2:GBX1:GBX2:GSX1:GSX2:HESX1:HMX1:HMX2:HMX3:HOXA1:HOXA2:HOXA3:HOXA4:HOXA5:HOXA6:HOXA7:HOXB1:HOXB2:HOXB3:HOXB4:HOXB5:HOXB6:HOXB7:HOXB8:HOXC4:HOXC5:HOXC6:HOXD1:HOXD3:HOXD4:HOXD8:ISX:MEOX1:MEOX2:MNX1:NKX1-1:NKX1-2:NOTO:OTP:PDX1:TLX1:TLX3:VAX1:VAX2:VENTX	TTAATGAY	1	-2.272	0.6279	8	14.29%	1072.8	8.55%
M02056_3.00:FOXC1:FOXC2:FOXD1:FOXD2:FOXD3:FOXD4:FOXD4L1:FOXD4L3:FOXD4L4:FOXD4L5:FOXD4L6:FOXE1:FOXG1:FOXI1:FOXI2:FOXI3:FOXJ3:FOXK2:FOXL1:FOXL2:FOXS1	TTGTTTAY	1	-2.271	0.6279	6	10.71%	723	5.76%
M11550_3.00:CUX1:CUX2	YATTKRTCAAHHR	1	-2.271	0.6279	6	10.71%	723.9	5.77%
M11569_3.00:E2F1:E2F2:E2F3:E2F4:E2F5:E2F6	NRGAAACG	1	-2.269	0.6281	28	50.00%	5116.2	40.77%
M00382_3.00:SIX3:SIX6	NNGTATCAN	1	-2.269	0.6281	20	35.71%	3416.6	27.23%
M10653_3.00:ELF1:ELF2:ELF4:SPDEF	AVCAGGAWST	1	-2.266	0.6294	6	10.71%	724.8	5.78%
M11072_3.00:ATF1:CREB1:CREM	BKGRTGACGTCM	1	-2.261	0.6321	6	10.71%	725.2	5.78%
M02545_3.00:GMEB1:GMEB2	DRCGTVV	1	-2.251	0.6378	44	78.57%	8794.7	70.08%
M00320_3.00:ALX1:ALX3:ALX4:ARX:DRGX:ESX1:ISX:MIXL1:OTP:PHOX2A:PHOX2B:PROP1:PRRX1:PRRX2:RAX:RAX2:SEBOX:SHOX:SHOX2:UNCX:VSX1:VSX2	CTAATTAA	1	-2.247	0.6399	4	7.14%	402.4	3.21%
M10757_3.00:SMAD4	VBSYGTCTGG	1	-2.244	0.6418	14	25.00%	2214.2	17.64%
M10497_3.00:RUNX1:RUNX2:RUNX3	GGCTGTGGTTWG	1	-2.234	0.6475	4	7.14%	404.3	3.22%
M00437_3.00:HOXA10:HOXA11:HOXA6:HOXA9:HOXB6:HOXB8:HOXB9:HOXC10:HOXC11:HOXC12:HOXC6:HOXC8:HOXC9:HOXD10:HOXD11:HOXD12:HOXD8:HOXD9	TTWATKRBN	1	-2.233	0.6477	18	32.14%	3020.5	24.07%
M05274_3.00:HOXA3:HOXA4:HOXA5:HOXA6:HOXA7:HOXA9:HOXB3:HOXB4:HOXB5:HOXB6:HOXB7:HOXB8:HOXB9:HOXC4:HOXC5:HOXC6:HOXC8:HOXC9:HOXD3:HOXD4:HOXD8:HOXD9:PDX1	BTAATTRC	1	-2.229	0.6495	14	25.00%	2219.9	17.69%
M00181_3.00:MAF:MAFA:MAFB:MAFG:MAFK:NRL	NVGTCAGCAATNN	1	-2.227	0.6505	4	7.14%	405.9	3.23%
M11127_3.00:JUN:JUNB:JUND	GAGTCA	1	-2.227	0.6505	36	64.29%	6923.1	55.17%
M09867_3.00:ASCL1:ASCL2	AGCAGCTGB	1	-2.223	0.6524	10	17.86%	1452.4	11.57%
M04481_3.00:MAF:MAFA:MAFB:NRL	CGTCAGCANWWHN	1	-2.221	0.6534	4	7.14%	406.9	3.24%
M08838_3.00:EHF:ELF1:ELF2:ELF3:ELF4:ELF5:ELK1:ELK3:ELK4:ERF:ERG:ETS1:ETS2:ETV1:ETV2:ETV3:ETV3L:ETV4:ETV5:ETV6:ETV7:FEV:FLI1:GABPA:SPDEF	CAGGAAGTG	1	-2.217	0.6551	6	10.71%	734.3	5.85%
M11738_3.00:TFCP2:TFCP2L1:UBP1	CAGCTGC	1	-2.217	0.6551	20	35.71%	3438.6	27.40%
M11776_3.00:HOXA13:HOXB13:HOXC13:HOXD13	ATAAAA	1	-2.21	0.6589	16	28.57%	2624.8	20.92%
M09238_3.00:ZNF729	TTKWTKTKTBTGTDTKTGTBHH	1	-2.201	0.6645	4	7.14%	409.2	3.26%
M09948_3.00:ATF3:JDP2	VTGACTCAB	1	-2.198	0.6659	6	10.71%	738.8	5.89%
M05972_3.00:SOX1:SOX10:SOX11:SOX12:SOX13:SOX14:SOX15:SOX17:SOX18:SOX2:SOX21:SOX3:SOX30:SOX4:SOX5:SOX6:SOX7:SOX8:SOX9:SRY	CYATTGTTCT	1	-2.193	0.6686	6	10.71%	739.1	5.89%
M09861_3.00:ATOH1	AGCAGATGG	1	-2.193	0.6686	8	14.29%	1092.2	8.70%
M09902_3.00:ATOH1	AGCAGATGG	1	-2.193	0.6686	8	14.29%	1092.2	8.70%
M03963_3.00:GATA1:GATA2:GATA3:GATA4:GATA5:GATA6	VWGATAASR	1	-2.186	0.6719	10	17.86%	1463.1	11.66%
M09702_3.00:HSF2:HSF4	TGTTCCAT	1	-2.186	0.6719	10	17.86%	1463	11.66%
M11283_3.00:MAZ	GGGRGGGAGGG	1	-2.182	0.6737	10	17.86%	1464.3	11.67%
M06597_3.00:FOXP1:FOXP2:FOXP3:FOXP4	TTGTTTAYY	1	-2.181	0.6737	4	7.14%	412.4	3.29%
M09881_3.00:NEUROG2:NEUROG3	GSARCAGATGGY	1	-2.181	0.6737	4	7.14%	412.7	3.29%
M10494_3.00:RUNX1:RUNX2:RUNX3	KYTGTGGTTTB	1	-2.181	0.6737	4	7.14%	412.1	3.28%
M10772_3.00:EOMES:TBX2:TBX20:TBX3:TBX4:TBX5	AGGTGTCA	1	-2.179	0.674	16	28.57%	2636.4	21.01%
M10496_3.00:RUNX1:RUNX2:RUNX3	BYCTGTGGTTTB	1	-2.175	0.6763	4	7.14%	413	3.29%
M04357_3.00:HEY1	BGCACGTGTC	1	-2.175	0.6763	6	10.71%	743.3	5.92%
M11294_3.00:GLIS3	ACAGCAGG	1	-2.171	0.6778	16	28.57%	2639.7	21.03%
M11063_3.00:ATF2	VGTGACGTCAW	1	-2.17	0.6783	6	10.71%	744.2	5.93%
M01820_3.00:BHLHE40:BHLHE41	NCACGTGM	1	-2.162	0.6833	24	42.86%	4304.5	34.30%
M08148_3.00:ZNF460	GGGGAGGCGGCG	1	-2.16	0.6837	6	10.71%	746.3	5.95%
M06026_3.00:TBX1:TBX10	KNAGGTGTGAAW	1	-2.156	0.6861	4	7.14%	416.7	3.32%
M10161_3.00:E2F1:E2F2:E2F3:E2F4:E2F5:E2F6	GGGCGGGARG	1	-2.156	0.6861	4	7.14%	416.8	3.32%
M05961_3.00:LEF1:TCF7:TCF7L1:TCF7L2	CTTTGATGT	1	-2.149	0.69	4	7.14%	417.6	3.33%
M02967_3.00:TFAP2A:TFAP2B:TFAP2C:TFAP2D:TFAP2E	HGCCTGAGGCD	1	-2.146	0.6914	6	10.71%	749.4	5.97%
M06177_3.00:CXXC4:CXXC5:TET3	NNNNNNNACGYN	1	-2.143	0.6935	44	78.57%	8844.1	70.48%
M12454_3.00:SOX1:SOX10:SOX11:SOX12:SOX13:SOX14:SOX15:SOX17:SOX18:SOX2:SOX21:SOX3:SOX30:SOX4:SOX5:SOX6:SOX7:SOX8:SOX9:SRY	AAACAAA	1	-2.137	0.6971	26	46.43%	4745.9	37.82%
M00857_3.00:ZNF32	TATATATAT	1	-2.136	0.6971	4	7.14%	419.2	3.34%
M01571_3.00:ELF1:ELF2:ELF4:ELK1:ELK3:ELK4:ERF:ERG:ETS1:ETS2:ETV1:ETV2:ETV3:ETV3L:ETV4:ETV5:FEV:FLI1:GABPA	NRCCGGAART	1	-2.128	0.7018	6	10.71%	753.8	6.01%
M10949_3.00:EPAS1:HIF1A	VDGCACGTMC	1	-2.128	0.7018	6	10.71%	753.1	6.00%
M06210_3.00:ZNF362	KAAAAAAA	1	-2.119	0.7074	10	17.86%	1483	11.82%
M02069_3.00:FOXC2:FOXD1:FOXD2:FOXD3:FOXG1:FOXI1:FOXI2:FOXI3:FOXJ2:FOXJ3:FOXK1:FOXK2:FOXP1:FOXP3	NNTGTTKNB	1	-2.118	0.7081	36	64.29%	6977.2	55.60%
M09036_3.00:KLF4	WGGGYGKGGC	1	-2.106	0.7152	10	17.86%	1487.5	11.85%
M09039_3.00:KLF10	WGGGYGKGGC	1	-2.106	0.7152	10	17.86%	1487.5	11.85%
M09835_3.00:TFAP4	VAWCAGCTGG	1	-2.096	0.7221	6	10.71%	760.8	6.06%
M02051_3.00:E2F1:E2F2:E2F3:E2F4:E2F5:E2F6	WTGGCGCGCD	1	-2.093	0.7235	4	7.14%	426.2	3.40%
M08177_3.00:ZFP57	GCGGCA	1	-2.093	0.7235	4	7.14%	426.5	3.40%
M00391_3.00:PAX2:PAX6	GTGCACAC	1	-2.091	0.7239	6	10.71%	761.9	6.07%
M09973_3.00:ZFX:ZFY	SCAGGCCBCG	1	-2.091	0.7239	12	21.43%	1876.3	14.95%
M06274_3.00:NFKB1:NFKB2	VGGGRAANYCCCB	1	-2.069	0.7393	6	10.71%	767	6.11%
M00826_3.00:MITF:TFEC	RTCACGTGAY	1	-2.064	0.7421	6	10.71%	767.3	6.11%
M00523_3.00:MEIS1:MEIS2:MEIS3:PKNOX1:PKNOX2:TGIF1:TGIF2:TGIF2LX:TGIF2LY	NNTGACAGNN	1	-2.062	0.7431	38	67.86%	7465	59.49%
M00387_3.00:HOXA5:HOXA6:HOXA7:HOXB5:HOXB6:HOXB7:HOXB8:HOXC5:HOXC6:HOXC8:HOXD8	NTTATATATA	1	-2.062	0.7431	4	7.14%	431.4	3.44%
M08839_3.00:EHF:ELF1:ELF2:ELF3:ELF4:ELF5:ETV6:ETV7:FEV	CAGGAAGTG	1	-2.06	0.7434	6	10.71%	768.6	6.12%
M09899_3.00:ARNTL	GKCACGTGG	1	-2.06	0.7434	6	10.71%	768.6	6.12%
M02102_3.00:GCM1:GCM2	RCCCGCATN	1	-2.055	0.7466	18	32.14%	3094.2	24.66%
M09411_3.00:PRDM1	AAGDGAAAGTGARRR	1	-2.05	0.7493	4	7.14%	434	3.46%
M09500_3.00:ZSCAN30	SKGVDGGCYGCWGGC	1	-2.05	0.7493	4	7.14%	433.5	3.45%
M05267_3.00:ALX1:ALX3:ALX4:ARX:DRGX:EMX1:EMX2:EN1:EN2:ESX1:GBX1:GBX2:GSX1:GSX2:HESX1:HOXA2:HOXA3:HOXB2:HOXB3:HOXD3:ISX:LHX1:LHX2:LHX3:LHX4:LHX5:LHX6:LHX8:LHX9:LMX1A:LMX1B:MIXL1:MNX1:MSX1:MSX2:NOBOX:NOTO:OTP:PDX1:PHOX2A:PHOX2B:PROP1:PRRX1:PRRX2:RAX:RAX2:SEBOX:SHOX:SHOX2:UNCX:VAX1:VAX2:VSX1:VSX2:ZFHX2	STAATTAM	1	-2.05	0.7493	8	14.29%	1130.1	9.01%
M00217_3.00:FOXA1:FOXA2:FOXA3:FOXB1:FOXB2	TTGTTTAC	1	-2.044	0.7517	4	7.14%	434.5	3.46%
M09994_3.00:KLF1:KLF12:KLF2:KLF3:KLF4:KLF5:KLF6:KLF7:KLF8	DGGGYGKGGCCGGG	1	-2.044	0.7517	4	7.14%	434.2	3.46%
M11761_3.00:ALX1:ALX3:ALX4:ARX:BARHL1:BARHL2:BARX1:BARX2:BSX:DLX1:DLX2:DLX3:DLX4:DLX5:DLX6:DRGX:EMX2:EN1:EN2:GBX1:GBX2:GSX1:GSX2:HOXA1:HOXA2:HOXA3:HOXB1:HOXB2:HOXB3:HOXD1:HOXD3:ISX:LHX1:LHX5:MEOX1:MEOX2:MNX1:MSX1:MSX2:NANOG:NANOGP8:NKX1-1:NKX1-2:PDX1:PHOX2A:PHOX2B:PROP1:PRRX1:PRRX2:SHOX:SHOX2:UNCX:VAX1:VAX2:VSX1:VSX2	CHCYWAATTAAH	1	-2.044	0.7517	4	7.14%	434.5	3.46%
M10701_3.00:ISL1:ISL2:NOTO:SHOX:SHOX2:VSX1	CTAATKGV	1	-2.042	0.7524	8	14.29%	1133	9.03%
M11608_3.00:EHF:ELF1:ELF2:ELF3:ELF4:ELF5:ELK1:ELK3:ELK4:ERF:ERG:ETS1:ETS2:ETV1:ETV2:ETV3:ETV3L:ETV4:ETV5:ETV6:ETV7:FEV:FLI1:GABPA:SPDEF	DVCAGGAAGTGS	1	-2.036	0.7569	10	17.86%	1509.4	12.03%
M04338_3.00:HEY1:HEY2:HEYL	SGCACGTGYS	1	-2.033	0.7582	6	10.71%	774.4	6.17%
M06638_3.00:ALX1:ALX3:ALX4:ARX:BARHL1:BARHL2:BARX1:BARX2:BSX:DLX1:DLX2:DLX3:DLX4:DLX5:DLX6:DRGX:EMX1:EMX2:EN1:EN2:ESX1:EVX1:EVX2:GBX1:GBX2:GSX1:GSX2:HESX1:HOXA1:HOXA2:HOXA3:HOXA4:HOXA5:HOXB1:HOXB2:HOXB3:HOXB4:HOXB5:HOXC4:HOXC5:HOXD1:HOXD3:HOXD4:ISX:LHX1:LHX3:LHX4:LHX5:MEOX1:MEOX2:MIXL1:MNX1:MSX1:MSX2:NANOG:NANOGP8:NKX1-1:NKX1-2:NOTO:OTP:PDX1:PHOX2A:PHOX2B:PROP1:PRRX1:PRRX2:RAX:RAX2:SEBOX:SHOX:SHO…	VYTAATTA	1	-2.024	0.7646	8	14.29%	1137.1	9.06%
M04275_3.00:TFAP4	AWCAGCTGWT	1	-2.02	0.7671	6	10.71%	778	6.20%
M00823_3.00:MLX	CACGTGNHN	1	-2.014	0.7715	12	21.43%	1903.7	15.17%
M10972_3.00:CLOCK	WCASGTGG	1	-2.01	0.7738	22	39.29%	3950.3	31.48%
M06566_3.00:KLF1:KLF12:KLF8	TGGGCGTGGYC	1	-2.008	0.7748	4	7.14%	440.3	3.51%
M05561_3.00:SIX3:SIX6	VCGTATCRYN	1	-2.003	0.7785	6	10.71%	781.4	6.23%
M12473_3.00:STAT1	NGGAAAWB	1	-1.988	0.7897	34	60.71%	6589.1	52.51%
M03989_3.00:BARX1:BARX2:BSX:EMX1:EMX2:EN1:EN2:EVX1:EVX2:GBX1:GBX2:GSX1:GSX2:HESX1:HMX1:HMX2:HMX3:HOXA1:HOXA2:HOXA3:HOXA4:HOXA5:HOXA6:HOXA7:HOXB1:HOXB2:HOXB3:HOXB4:HOXB5:HOXB6:HOXB7:HOXB8:HOXC4:HOXC5:HOXC6:HOXD1:HOXD3:HOXD4:HOXD8:ISX:MEOX1:MEOX2:MNX1:NKX1-1:NKX1-2:NOTO:OTP:PDX1:TLX1:TLX3:VAX1:VAX2:VENTX	GYTAATGATS	1	-1.985	0.791	4	7.14%	444.1	3.54%
M08979_3.00:BACH1:BACH2	AAHTGCTGA	1	-1.985	0.791	4	7.14%	444.1	3.54%
M11712_3.00:GATA1:GATA2:GATA3:GATA4:GATA5:GATA6	AGATAA	1	-1.98	0.7943	14	25.00%	2312.1	18.42%
M01808_3.00:HES1:HES4	SSCACGYGHC	1	-1.977	0.795	6	10.71%	787.8	6.28%
M09839_3.00:AHR	GCACGCAAH	1	-1.977	0.795	6	10.71%	787.3	6.27%
M09870_3.00:AHR	GCACGCAAH	1	-1.977	0.795	6	10.71%	787.3	6.27%
M11724_3.00:TRPS1	KAGATA	1	-1.977	0.795	18	32.14%	3128.2	24.93%
M06279_3.00:SOX1:SOX10:SOX11:SOX12:SOX13:SOX14:SOX15:SOX17:SOX18:SOX2:SOX21:SOX3:SOX30:SOX4:SOX5:SOX6:SOX7:SOX8:SOX9:SRY	BCYATTGTTW	1	-1.973	0.7973	6	10.71%	788.7	6.28%
M11986_3.00:HSF1:HSF2:HSF4	AGAABGTTCG	1	-1.968	0.801	4	7.14%	447.7	3.57%
M00714_3.00:DMRT1:DMRT2:DMRT3:DMRTA2:DMRTB1:DMRTC2	THGHWACADT	1	-1.967	0.801	10	17.86%	1531.8	12.21%
M00538_3.00:SIX3:SIX6	NYGATAC	1	-1.95	0.8142	40	71.43%	7988.9	63.66%
M08842_3.00:EHF:ELF1:ELF2:ELF3:ELF4:ELF5:ETV6:ETV7	CAGGAAGTG	1	-1.947	0.8156	6	10.71%	794.9	6.33%
M05432_3.00:HESX1:NOBOX	CYAATTAH	1	-1.946	0.8159	8	14.29%	1159.9	9.24%
M05350_3.00:ALX1:ALX3:ALX4:ARX:BARHL1:BARHL2:BARX1:BARX2:BSX:DLX2:DRGX:EMX1:EMX2:EN1:EN2:ESX1:EVX1:EVX2:GBX1:GBX2:GSX1:GSX2:HESX1:HMX1:HMX2:HMX3:HOXA1:HOXA2:HOXA3:HOXA4:HOXA5:HOXB1:HOXB2:HOXB3:HOXB4:HOXB5:HOXC4:HOXC5:HOXD3:HOXD4:LHX2:LHX3:LHX4:LHX9:MEOX1:MEOX2:MIXL1:MNX1:MSX1:MSX2:NKX1-1:NKX1-2:NOTO:OTP:PDX1:PHOX2A:PHOX2B:PROP1:PRRX1:PRRX2:RAX:RAX2:SEBOX:SHOX:SHOX2:TLX1:TLX2:TLX3:UNCX:VAX1:VAX2:V…	CTAATTAV	1	-1.946	0.8159	10	17.86%	1538.5	12.26%
M11923_3.00:ISL1:ISL2:NOTO:SHOX:SHOX2:VSX1	CCATTAT	1	-1.942	0.8184	14	25.00%	2327.5	18.55%
M00325_3.00:CRX:DMBX1:DPRX:GSC:GSC2:OTX1:OTX2:PITX1:PITX2:PITX3:TPRX1	NTAATCC	1	-1.927	0.8299	30	53.57%	5726.5	45.63%
M11889_3.00:ALX1:ALX3:ALX4:ARX:DRGX:EN1:EN2:ESX1:GBX1:GBX2:ISX:LHX2:LHX3:LHX4:LHX6:LHX9:LMX1A:LMX1B:MIXL1:MSX1:MSX2:NOBOX:OTP:PDX1:PHOX2A:PHOX2B:PROP1:PRRX1:PRRX2:RAX:RAX2:SEBOX:SHOX:SHOX2:UNCX:VAX1:VAX2:VSX1:VSX2	CAATTA	1	-1.922	0.8336	8	14.29%	1166.2	9.29%
M11570_3.00:E2F1:E2F2:E2F3:E2F4:E2F5:E2F6	CGAAACGT	1	-1.916	0.8383	10	17.86%	1548.3	12.34%
M11342_3.00:KLF1:KLF12:KLF2:KLF3:KLF4:KLF5:KLF6:KLF7	VNRGGGRGGGGHSS	1	-1.914	0.8391	16	28.57%	2744.4	21.87%
M05304_3.00:BARX1:BARX2:BSX:DLX1:DLX2:DLX3:DLX4:DLX5:DLX6:EN1:EN2:EVX1:EVX2:GBX1:GBX2:GSX1:GSX2:HOXA1:HOXA2:HOXA3:HOXA4:HOXA5:HOXB1:HOXB2:HOXB3:HOXB4:HOXB5:HOXC4:HOXC5:HOXD1:HOXD3:HOXD4:MEOX1:MEOX2:MNX1:MSX1:MSX2:NANOG:NANOGP8:NKX1-1:NKX1-2:PDX1:VAX1:VAX2:VENTX	NTAAYGAY	1	-1.913	0.8393	20	35.71%	3574.2	28.48%
M00895_3.00:GMEB1:GMEB2	NTRCGTMR	1	-1.91	0.8415	38	67.86%	7544.1	60.12%
M10117_3.00:EGR1:EGR2:EGR3:EGR4	KGYGTGGGYGGGGG	1	-1.9	0.8495	4	7.14%	459.7	3.66%
M00594_3.00:ALX1:ALX3:ALX4:ARX:DRGX:EN1:EN2:ESX1:ISX:LHX2:LHX3:LHX4:LHX6:LHX8:LHX9:LMX1A:LMX1B:MIXL1:OTP:PHOX2A:PHOX2B:PROP1:PRRX1:PRRX2:RAX:RAX2:SEBOX:SHOX:SHOX2:UNCX:VSX1:VSX2:ZFHX2	NHTRATTRN	1	-1.888	0.8588	22	39.29%	4009.1	31.95%
M08138_3.00:ZNF441	GGGGGCGGAGYC	1	-1.884	0.8625	4	7.14%	462.1	3.68%
M06283_3.00:SOX1:SOX10:SOX11:SOX12:SOX13:SOX14:SOX15:SOX17:SOX18:SOX2:SOX21:SOX3:SOX30:SOX4:SOX5:SOX6:SOX7:SOX8:SOX9:SRY	YCYATTGTTT	1	-1.881	0.8638	6	10.71%	810.5	6.46%
M10028_3.00:GFI1:GFI1B	GCWGTGATTT	1	-1.873	0.8697	6	10.71%	812.6	6.48%
M10107_3.00:GFI1:GFI1B	GCWGTGATTT	1	-1.873	0.8697	6	10.71%	812.6	6.48%
M05512_3.00:ALX1:ALX3:ALX4:ARX:BARX1:BARX2:BSX:DLX1:DLX2:DLX3:DLX4:DLX5:DLX6:DRGX:EN1:EN2:ESX1:GBX1:GBX2:GSX1:GSX2:HESX1:HOXA1:HOXA2:HOXA3:HOXA4:HOXA5:HOXB1:HOXB2:HOXB3:HOXB4:HOXB5:HOXC4:HOXC5:HOXD3:HOXD4:ISX:LBX2:LHX1:LHX2:LHX3:LHX4:LHX5:LHX6:LHX8:LHX9:LMX1A:LMX1B:MEOX1:MIXL1:MNX1:MSX1:MSX2:NKX1-1:NKX1-2:NOBOX:NOTO:OTP:PDX1:PHOX2A:PHOX2B:PROP1:PRRX1:PRRX2:RAX:RAX2:SEBOX:SHOX:SHOX2:UNCX:VAX1:VAX2…	TTAATTAG	1	-1.873	0.8697	4	7.14%	464.1	3.70%
M11534_3.00:YBX1:YBX2:YBX3	CCAATCDGMR	1	-1.872	0.8699	10	17.86%	1563.7	12.46%
M06621_3.00:CDX1:CDX2:CDX4:HOXA13:HOXC13	DTTWATTA	1	-1.869	0.8718	10	17.86%	1564.9	12.47%
M06687_3.00:ALX1:ALX3:ALX4:ARX:BARHL1:BARHL2:BARX1:BARX2:BSX:DLX1:DLX2:DLX3:DLX4:DLX5:DLX6:DRGX:EMX1:EMX2:EN1:EN2:ESX1:EVX1:EVX2:GBX1:GBX2:GSX1:GSX2:HESX1:HOXA2:HOXA3:HOXA4:HOXB2:HOXB3:HOXB4:HOXC4:HOXC5:HOXD3:HOXD4:ISX:LBX1:LBX2:LHX1:LHX2:LHX3:LHX4:LHX5:LHX6:LHX8:LHX9:LMX1A:LMX1B:MEOX1:MIXL1:MNX1:MSX1:MSX2:NKX1-1:NKX1-2:NOBOX:NOTO:OTP:PDX1:PHOX2A:PHOX2B:PROP1:PRRX1:PRRX2:RAX:RAX2:SEBOX:SHOX:SHOX2…	TTAATTA	1	-1.868	0.8718	8	14.29%	1182.2	9.42%
M10875_3.00:TFAP2A:TFAP2B:TFAP2C:TFAP2D:TFAP2E	KGCCTGVRGGCTSDBS	1	-1.862	0.8767	4	7.14%	466.7	3.72%
M11726_3.00:GCM1:GCM2	ATGCGGG	1	-1.858	0.8797	18	32.14%	3182.6	25.36%
M10311_3.00:ALX1:ALX3:ALX4:ARX:DRGX:EMX1:EMX2:EN1:EN2:ESX1:GBX1:GBX2:GSX1:GSX2:HESX1:HOXA2:HOXA3:HOXB2:HOXB3:HOXD3:ISX:LHX1:LHX2:LHX3:LHX4:LHX5:LHX6:LHX8:LHX9:LMX1A:LMX1B:MIXL1:MNX1:MSX1:MSX2:NOBOX:NOTO:OTP:PDX1:PHOX2A:PHOX2B:PROP1:PRRX1:PRRX2:RAX:RAX2:SEBOX:SHOX:SHOX2:UNCX:VAX1:VAX2:VSX1:VSX2:ZFHX2	NCTAATKRM	1	-1.857	0.8799	16	28.57%	2769.9	22.07%
M00884_3.00:ESR1:ESR2:ESRRA:ESRRB:ESRRG:NR1H2:NR1H3:NR2C2:NR2F1:NR2F2:NR2F6:RARA:RARB:RARG:RORA:RORB:RORC	NRGGTCAHNN	1	-1.856	0.8799	28	50.00%	5323.4	42.42%
M06649_3.00:MEIS1:MEIS2:MEIS3:PKNOX1:PKNOX2:TGIF1:TGIF2	NTTGACAG	1	-1.855	0.8807	16	28.57%	2770.2	22.07%
M10471_3.00:NFKB1:NFKB2	AGGGAAAK	1	-1.853	0.8815	20	35.71%	3603.8	28.72%
M02540_3.00:GMEB1:GMEB2	NKTACGTVR	1	-1.851	0.8825	18	32.14%	3185.8	25.39%
M12158_3.00:MECP2	RSTTAYAAAGCT	1	-1.846	0.8868	4	7.14%	469.9	3.74%
M02103_3.00:GCM1:GCM2	NNRCCCGCAT	1	-1.839	0.8924	16	28.57%	2777.2	22.13%
M11318_3.00:EGR1:EGR2:EGR3:EGR4	GCGGGGGCGG	1	-1.835	0.8951	4	7.14%	472	3.76%
M08748_3.00:ZNF384	AAAAAAAA	1	-1.834	0.8955	10	17.86%	1576.7	12.56%
M02607_3.00:LIN54	NATTTAAATN	1	-1.833	0.8955	6	10.71%	822.8	6.56%
M05671_3.00:POU2F3	GNATGCTRATS	1	-1.833	0.8955	6	10.71%	822.2	6.55%
M10956_3.00:BHLHE40:BHLHE41	SNTCACGTGS	1	-1.829	0.8979	6	10.71%	823.4	6.56%
M00821_3.00:ASH1L:HMGA1:HMGA2:SETBP1:SRCAP	AAATAAAT	1	-1.829	0.8979	14	25.00%	2373.1	18.91%
M00859_3.00:ZFX:ZFY	NRGGCCNNN	1	-1.817	0.9074	38	67.86%	7594	60.51%
M11126_3.00:FOS:FOSB:FOSL1:FOSL2	TGAGTCAK	1	-1.817	0.9075	10	17.86%	1582.6	12.61%
M11463_3.00:BNC1:BNC2	TGAWGGTGG	1	-1.813	0.9098	6	10.71%	827.4	6.59%
M05790_3.00:HNF4A:HNF4G:NR2E1	ADAAGTCAM	1	-1.812	0.9102	14	25.00%	2380.3	18.97%
M12277_3.00:ESR1:ESR2:HNF4A:HNF4G:NR1D1:NR1D2:NR1H2:NR1H3:NR1H4:NR2C1:NR2C2:NR2F1:NR2F2:NR2F6:NR4A1:NR4A2:NR4A3:NR5A2:NR6A1:PPARA:PPARD:PPARG:RARA:RARB:RARG:RORA:RORB:RORC:RXRA:RXRB:RXRG:THRA:THRB	MAGGTCAAAGD	1	-1.81	0.9121	6	10.71%	828	6.60%
M11238_3.00:GLI1:GLI2:GLI3	TGGGTGGTCBS	1	-1.809	0.9123	4	7.14%	476.4	3.80%
M12399_3.00:SMAD4	TGTCTGN	1	-1.806	0.9146	26	46.43%	4913.8	39.16%
M01905_3.00:ATF2:CREB5	TKACGTCATN	1	-1.798	0.921	6	10.71%	831.6	6.63%
M00467_3.00:SIX3:SIX6	NGATATCAYYN	1	-1.793	0.9248	4	7.14%	479.1	3.82%
M00173_3.00:TCF12:TCF3:TCF4	VCACCTGB	1	-1.793	0.9248	26	46.43%	4920	39.21%
M02529_3.00:RFX1:RFX2:RFX3:RFX4:RFX6	GTTGCYADGG	1	-1.79	0.9264	6	10.71%	833.3	6.64%
M01821_3.00:BHLHE40:BHLHE41	GKCACGYGH	1	-1.784	0.9316	12	21.43%	1989.7	15.86%
M04258_3.00:TFAP2A:TFAP2B:TFAP2C:TFAP2D:TFAP2E	HGCCTSAGGCD	1	-1.782	0.9323	6	10.71%	835.1	6.65%
M11647_3.00:FOXP3	BHKAAAACAVAD	1	-1.774	0.9393	10	17.86%	1597.6	12.73%
M01405_3.00:TEAD4	NRCATTCCD	1	-1.774	0.9393	20	35.71%	3642.3	29.02%
M03059_3.00:MAF:MAFA:MAFB:MAFG:MAFK	GTCAGCAHWWTT	1	-1.773	0.9393	4	7.14%	483	3.85%
M06469_3.00:EGR1:EGR2:EGR3:EGR4	KKGCGTGGGCGKDN	1	-1.773	0.9393	4	7.14%	483.8	3.85%
M11652_3.00:FOXC1:FOXC2:FOXD1:FOXD2:FOXD3:FOXD4:FOXD4L1:FOXD4L3:FOXD4L4:FOXD4L5:FOXD4L6:FOXE1:FOXE3:FOXF1:FOXF2:FOXI1:FOXL1:FOXL2:FOXS1	ATAAACAT	1	-1.773	0.9393	4	7.14%	483.1	3.85%
M00189_3.00:KLF1:KLF12:KLF2:KLF3:KLF4:KLF5:KLF6:KLF7	DGGGCGTGGC	1	-1.772	0.9393	14	25.00%	2397.3	19.10%
M10793_3.00:GATA1:GATA2:GATA3:GATA4:GATA5:GATA6	KCGATAABA	1	-1.771	0.9393	6	10.71%	838.7	6.68%
M01640_3.00:SRF	TCCNNWTTNG	1	-1.768	0.9412	14	25.00%	2399.8	19.12%
M08399_3.00:E2F1:E2F2:E2F3:E2F4:E2F5:E2F6	NGGGCGGGAAR	1	-1.767	0.9412	4	7.14%	484.4	3.86%
M06636_3.00:ALX1:ALX3:ALX4:ARX:BARHL1:BARHL2:BARX1:BARX2:BSX:DLX1:DLX2:DLX3:DLX4:DLX5:DLX6:DRGX:EMX1:EMX2:EN1:EN2:ESX1:EVX1:EVX2:GBX1:GBX2:GSX1:GSX2:HESX1:HOXA1:HOXA2:HOXA3:HOXA4:HOXA5:HOXB1:HOXB2:HOXB3:HOXB4:HOXB5:HOXC4:HOXC5:HOXD1:HOXD3:HOXD4:ISX:LHX1:LHX3:LHX4:LHX5:MEOX1:MEOX2:MIXL1:MNX1:MSX1:MSX2:NANOG:NANOGP8:NKX1-1:NKX1-2:NOTO:OTP:PDX1:PHOX2A:PHOX2B:PROP1:PRRX1:PRRX2:RAX:RAX2:SEBOX:SHOX:SHO…	DYTAATKA	1	-1.767	0.9412	8	14.29%	1213.3	9.67%
M06030_3.00:TEAD1:TEAD3:TEAD4	CRCATWCCA	1	-1.756	0.9507	6	10.71%	842.4	6.71%
M10100_3.00:GFI1:GFI1B	GCTGTGATTT	1	-1.752	0.9537	6	10.71%	844	6.73%
M10388_3.00:ESR1:ESR2:NR1D1:NR1D2:NR1H2:NR1H3:NR1H4:NR2C1:NR2C2:NR2F1:NR2F2:NR2F6:NR4A1:NR4A2:NR4A3:NR5A1:NR5A2:NR6A1:PPARA:PPARD:PPARG:RARA:RARB:RARG:RORA:RORB:RORC:RXRA:RXRB:RXRG:THRA:THRB	AWSTRGGTCARRG	1	-1.744	0.9597	6	10.71%	845.8	6.74%
M10450_3.00:ESR1:ESR2:NR1D1:NR1D2:NR1H2:NR1H3:NR1H4:NR2C1:NR2C2:NR2F1:NR2F2:NR2F6:NR4A1:NR4A2:NR4A3:NR5A1:NR5A2:NR6A1:PPARA:PPARD:PPARG:RARA:RARB:RARG:RORA:RORB:RORC:RXRA:RXRB:RXRG:THRA:THRB	AWSTRGGTCARRG	1	-1.744	0.9597	6	10.71%	845.8	6.74%
M06190_3.00:NR1H2:NR1H3:NR1H4:NR2C1:NR2C2:NR2F1:NR2F2:NR2F6:RARA:RARB:RARG:RORA:RORB:RORC:RXRA:RXRB:RXRG:VDR	AGGTCA	1	-1.744	0.9597	12	21.43%	2005.7	15.98%
M12766_3.00:NR1H2:NR1H3:NR1H4:NR2C1:NR2C2:NR2F1:NR2F2:NR2F6:RARA:RARB:RARG:RORA:RORB:RORC:RXRA:RXRB:RXRG:VDR	AGGTCA	1	-1.744	0.9597	12	21.43%	2005.7	15.98%
M01402_3.00:LIN54	NTTTGAANN	1	-1.741	0.9608	24	42.86%	4514.5	35.97%
M05268_3.00:ALX1:ALX3:ALX4:ARX:DRGX:EMX1:EMX2:EN1:EN2:ESX1:GBX1:GBX2:GSX1:GSX2:HESX1:HOXA2:HOXA3:HOXB2:HOXB3:HOXD3:ISX:LHX1:LHX2:LHX3:LHX4:LHX5:LHX6:LHX8:LHX9:LMX1A:LMX1B:MIXL1:MNX1:MSX1:MSX2:NOBOX:NOTO:OTP:PDX1:PHOX2A:PHOX2B:PROP1:PRRX1:PRRX2:RAX:RAX2:SEBOX:SHOX:SHOX2:UNCX:VAX1:VAX2:VSX1:VSX2:ZFHX2	BTAATTAV	1	-1.739	0.9627	8	14.29%	1222.1	9.74%
M00543_3.00:MEIS1:MEIS2:MEIS3:PKNOX1:PKNOX2:TGIF1:TGIF2	RSCTGTCAN	1	-1.736	0.9644	20	35.71%	3662	29.18%
M05975_3.00:LEF1:TCF7:TCF7L1:TCF7L2	CTTTGATST	1	-1.732	0.9676	4	7.14%	491	3.91%
M06708_3.00:ALX1:ALX3:ALX4:ARX:BARHL1:BARHL2:BARX1:BARX2:BSX:DLX1:DLX2:DLX3:DLX4:DLX5:DLX6:DRGX:EMX1:EMX2:EN1:EN2:ESX1:EVX1:EVX2:GBX1:GBX2:GSX1:GSX2:HESX1:HMX1:HMX2:HMX3:HOXA1:HOXA2:HOXA3:HOXA4:HOXA5:HOXB1:HOXB2:HOXB3:HOXB4:HOXB5:HOXC4:HOXC5:HOXD1:HOXD3:HOXD4:ISX:LBX1:LBX2:LHX2:LHX3:LHX4:LHX9:MEOX1:MEOX2:MIXL1:MNX1:MSX1:MSX2:NANOG:NANOGP8:NKX1-1:NKX1-2:NOBOX:NOTO:OTP:PDX1:PHOX2A:PHOX2B:PROP1:PRRX…	YTAATTR	1	-1.729	0.9698	8	14.29%	1225.9	9.77%
M04378_3.00:OLIG2:OLIG3	AACAKATGGT	1	-1.727	0.9711	4	7.14%	492.1	3.92%
M01746_3.00:ARID3A:ARID3B:ARID3C	TTTRATHN	1	-1.726	0.9713	24	42.86%	4522.8	36.04%
M10950_3.00:EPAS1:HIF1A	NCVCACGT	1	-1.722	0.9749	16	28.57%	2830.8	22.56%
M11604_3.00:ELF1:ELF2:ELF4:ELK1:ELK3:ELK4:ERF:ERG:ETS1:ETS2:ETV1:ETV2:ETV3:ETV3L:ETV4:ETV5:FEV:FLI1:GABPA	CMGGAARTR	1	-1.718	0.9781	6	10.71%	852.6	6.79%
M06709_3.00:IRX2:IRX4:IRX5	TGTTWTTH	1	-1.718	0.9781	26	46.43%	4961.7	39.54%
M00609_3.00:HOXA10:HOXA11:HOXA6:HOXA9:HOXB6:HOXB8:HOXB9:HOXC10:HOXC11:HOXC12:HOXC5:HOXC6:HOXC8:HOXC9:HOXD10:HOXD11:HOXD12:HOXD8:HOXD9	WTTWATKRCN	1	-1.716	0.9786	10	17.86%	1618.5	12.90%
M00905_3.00:TBX2:TBX3:TBX4:TBX5	DAGGTGTBAN	1	-1.711	0.9829	16	28.57%	2835.6	22.60%
M00245_3.00:GMEB1:GMEB2	NNTRCGTMR	1	-1.708	0.9858	38	67.86%	7655.1	61.00%
M09428_3.00:KLF1:KLF12:KLF2:KLF3:KLF4:KLF5:KLF6:KLF7:KLF8	DGGGYGKGGCCGGGG	1	-1.708	0.9858	4	7.14%	496.5	3.96%
M12255_3.00:NR2C1:NR2C2:NR2F1:NR2F2:NR2F6:NR4A1:NR4A2:NR4A3:PPARD:PPARG:RARA:RARB:RARG:RORA:RORB:RORC:RXRA:RXRB:RXRG	RAAGGTCAVG	1	-1.708	0.9858	4	7.14%	496.6	3.96%
M11149_3.00:CEBPA:CEBPB:CEBPE	VTTDDGCAATNNNN	1	-1.708	0.9858	8	14.29%	1232.2	9.82%
M00529_3.00:HOXA10:HOXA11:HOXA9:HOXB9:HOXC10:HOXC11:HOXC12:HOXC9:HOXD10:HOXD11:HOXD12:HOXD9	TTTAYKRBN	1	-1.694	0.9966	14	25.00%	2432	19.38%
M09526_3.00:ZBTB48	YTAGGGACCGT	1	-1.689	1	6	10.71%	861	6.86%
M12515_3.00:TBP:TBPL2	GTATAAA	1	-1.688	1	14	25.00%	2434.2	19.40%
M08741_3.00:ZBTB24	GGGTCCTGGG	1	-1.683	1	4	7.14%	501.7	4.00%
M09422_3.00:PATZ1	GGGMGGGG	1	-1.68	1	20	35.71%	3690.8	29.41%
M01890_3.00:ATF2:CREB5	TKACGTCATN	1	-1.678	1	6	10.71%	863.7	6.88%
M00563_3.00:HOXA10:HOXA11:HOXC10:HOXC11:HOXC12:HOXD10:HOXD11:HOXD12:MEOX1	DTTTAYKRBN	1	-1.673	1	10	17.86%	1634.3	13.02%
M12530_3.00:TEAD1:TEAD3:TEAD4	ACATTCCWSNG	1	-1.671	1	6	10.71%	865.6	6.90%
M00454_3.00:MEIS1:MEIS2:MEIS3:PKNOX1:PKNOX2:TGIF1:TGIF2:TGIF2LX:TGIF2LY	DNCTGTCA	1	-1.666	1	40	71.43%	8141.7	64.88%
M00220_3.00:GATA1:GATA2:GATA3:GATA4:GATA5:GATA6	NWGATAAS	1	-1.657	1	16	28.57%	2861.7	22.80%
M02537_3.00:RFX1:RFX2:RFX3:RFX4:RFX6	GTTGCTANG	1	-1.656	1	6	10.71%	869.8	6.93%
M00195_3.00:ZNF410	TGGGATGG	1	-1.655	1	4	7.14%	507.5	4.04%
M03244_3.00:FOXO4	TGTTTAC	1	-1.649	1	6	10.71%	871.9	6.95%
M06711_3.00:IRX2:IRX4:IRX5	CWWTAACA	1	-1.647	1	14	25.00%	2452.1	19.54%
M10552_3.00:TBX2:TBX3:TBX4:TBX5	RAGGTGYBA	1	-1.646	1	20	35.71%	3708	29.55%
M02172_3.00:ALX1:ALX3:ALX4:ARX:BARHL1:BARHL2:DRGX:ESX1:EVX1:EVX2:GBX1:GBX2:HESX1:LBX1:LBX2:MEOX1:MEOX2:MIXL1:MSX1:MSX2:PHOX2A:PHOX2B:PROP1:PRRX1:PRRX2:RAX:RAX2:SHOX:SHOX2:TLX1:TLX3:UNCX:VSX1:VSX2	TTAATTAG	1	-1.645	1	4	7.14%	509.6	4.06%
M02866_3.00:ARX:BARHL1:BARHL2:BARX1:BARX2:BSX:DLX1:DLX2:DLX3:DLX4:DLX5:DLX6:EMX2:EN1:EN2:GBX1:GBX2:GSX1:GSX2:HOXA1:HOXA2:HOXA3:HOXB1:HOXB2:HOXB3:HOXD1:HOXD3:ISX:LHX1:LHX5:MEOX1:MNX1:MSX1:MSX2:NANOG:NANOGP8:NKX1-1:NKX1-2:PDX1:PHOX2A:PHOX2B:PROP1:SHOX:SHOX2:UNCX:VAX1:VAX2:VSX2	TAATTG	1	-1.644	1	8	14.29%	1253.8	9.99%
M00717_3.00:E2F1:E2F2:E2F3:E2F4:E2F5:E2F6	KGGCGCGYWN	1	-1.635	1	8	14.29%	1256.5	10.01%
M10602_3.00:USF2	ACCACGTGAC	1	-1.635	1	6	10.71%	875.4	6.98%
M10592_3.00:MYF5:MYF6:MYOD1:MYOG	AACAGCTG	1	-1.628	1	6	10.71%	877.4	6.99%
M05581_3.00:ALX1:ALX3:ALX4:ARX:BARHL1:BARHL2:BARX1:BARX2:BSX:DLX1:DLX2:DLX3:DLX4:DLX5:DLX6:DRGX:EMX1:EMX2:EN1:EN2:ESX1:EVX1:EVX2:GBX1:GBX2:GSX1:GSX2:HMX1:HMX2:HMX3:HOXA1:HOXA2:HOXA3:HOXA4:HOXA5:HOXB1:HOXB2:HOXB3:HOXB4:HOXB5:HOXC4:HOXC5:HOXD1:HOXD3:HOXD4:ISX:MEOX1:MEOX2:MIXL1:MNX1:MSX1:MSX2:NANOG:NANOGP8:NKX1-1:NKX1-2:PDX1:PHOX2A:PHOX2B:PROP1:PRRX1:PRRX2:RAX:RAX2:SEBOX:SHOX:SHOX2:UNCX:VAX1:VAX2:VE…	NTAACGAB	1	-1.627	1	12	21.43%	2053.4	16.36%
M03923_3.00:DMRT1:DMRT2:DMRT3:DMRTA2:DMRTC2	WWYGATACATN	1	-1.626	1	4	7.14%	513.9	4.09%
M12177_3.00:MYB:MYBL1	GSCAGTTRRB	1	-1.626	1	8	14.29%	1260	10.04%
M10929_3.00:TFAP4	ACCAGCTGWG	1	-1.621	1	6	10.71%	879.6	7.01%
M11664_3.00:FOXA1:FOXA2:FOXA3:FOXB1:FOXB2	AGYAAACAA	1	-1.618	1	10	17.86%	1655	13.19%
M01996_3.00:TET1	NNCRCGYTN	1	-1.615	1	24	42.86%	4584.9	36.54%
M00881_3.00:ESR1:ESR2:NR1D1:NR1D2:NR1H2:NR1H3:NR1H4:NR2C1:NR2C2:NR2F1:NR2F2:NR2F6:NR4A1:NR4A2:NR4A3:NR5A2:NR6A1:PPARA:PPARD:PPARG:RARA:RARB:RARG:RORA:RORB:RORC:RXRA:RXRB:RXRG	NDAGGTCANN	1	-1.614	1	28	50.00%	5459.3	43.50%
M04401_3.00:BHLHA15	AACAGCTGTT	1	-1.613	1	4	7.14%	516.7	4.12%
M00503_3.00:ALX1:ALX3:ALX4:ARX:DRGX:EN1:EN2:ESX1:GBX1:GBX2:ISX:LHX2:LHX3:LHX4:LHX6:LHX9:LMX1A:LMX1B:MIXL1:MSX1:MSX2:NOBOX:OTP:PDX1:PHOX2A:PHOX2B:PROP1:PRRX1:PRRX2:RAX:RAX2:SEBOX:SHOX:SHOX2:UNCX:VAX1:VAX2:VSX1:VSX2	HTAATTRRN	1	-1.606	1	14	25.00%	2471.7	19.70%
M11404_3.00:EGR1:EGR2:EGR3:EGR4	DKVAGTGGGCGKGH	1	-1.603	1	4	7.14%	518.6	4.13%
M12493_3.00:STAT3	TTCYGGGAAN	1	-1.6	1	6	10.71%	885.2	7.05%
M11325_3.00:SNAI1	CCACCTGCMN	1	-1.6	1	14	25.00%	2474.9	19.72%
M02620_3.00:THAP12	NTNTMGTYKGGN	1	-1.589	1	14	25.00%	2479	19.75%
M04285_3.00:MLX	KCAYGTGA	1	-1.588	1	12	21.43%	2070.1	16.50%
M08637_3.00:TFAP2A:TFAP2B:TFAP2C:TFAP2D:TFAP2E	GCCTGAGGC	1	-1.586	1	6	10.71%	889.5	7.09%
M03250_3.00:FOXC2:FOXD1:FOXD2:FOXD3:FOXG1:FOXI1:FOXI2:FOXI3:FOXJ2:FOXJ3:FOXK1:FOXK2:FOXP1:FOXP3	TTGTTTAY	1	-1.585	1	10	17.86%	1668	13.29%
M11006_3.00:SREBF1:SREBF2	NSGCCACCYSMS	1	-1.581	1	18	32.14%	3318.8	26.45%
M04414_3.00:ASCL1:ASCL2	RGCAGCTGCB	1	-1.579	1	6	10.71%	891.1	7.10%
M09991_3.00:KLF1:KLF12:KLF2:KLF3:KLF4:KLF5:KLF6:KLF7:KLF8	WGGGTGKGGCWGGG	1	-1.572	1	4	7.14%	525.5	4.19%
M02168_3.00:ALX1:ALX3:ALX4:ARX:DRGX:EN1:EN2:ESX1:ISX:LHX2:LHX3:LHX4:LHX6:LHX8:LHX9:LMX1A:LMX1B:MIXL1:OTP:PHOX2A:PHOX2B:PROP1:PRRX1:PRRX2:RAX:RAX2:SEBOX:SHOX:SHOX2:UNCX:VSX1:VSX2:ZFHX2	NTGATTRN	1	-1.567	1	16	28.57%	2905.1	23.15%
M00388_3.00:HOXA3:HOXA4:HOXA5:HOXA6:HOXA7:HOXB3:HOXB4:HOXB5:HOXB6:HOXB7:HOXB8:HOXC4:HOXC5:HOXC6:HOXC8:HOXD3:HOXD4:HOXD8:PDX1	NTATATATTW	1	-1.563	1	4	7.14%	527.3	4.20%
M05219_3.00:BARHL1:BARHL2:BARX1:BARX2:BSX:DLX1:DLX2:DLX3:DLX4:DLX5:DLX6:EVX1:EVX2:GBX1:GBX2:HMX1:HMX2:HMX3:HOXA1:HOXA2:HOXA3:HOXB1:HOXB2:HOXB3:HOXD1:HOXD3:MEOX1:MEOX2:MNX1:MSX1:MSX2:NANOG:NANOGP8:PDX1:VENTX	BTRATBGB	1	-1.562	1	42	75.00%	8667.6	69.07%
M06633_3.00:ALX1:ALX3:ALX4:ARX:BARX1:BARX2:BSX:DLX1:DLX2:DLX3:DLX4:DLX5:DLX6:DRGX:EMX1:EMX2:EN1:EN2:ESX1:EVX1:EVX2:GBX1:GBX2:GSX1:GSX2:HESX1:HMX1:HMX3:HOXA1:HOXA2:HOXA3:HOXA4:HOXA5:HOXB1:HOXB2:HOXB3:HOXB4:HOXB5:HOXC4:HOXC5:HOXD1:HOXD3:HOXD4:ISX:LHX2:LHX3:LHX4:LHX6:LHX8:LHX9:LMX1A:LMX1B:MEOX1:MIXL1:MNX1:MSX1:MSX2:NKX1-1:NKX1-2:NOBOX:NOTO:OTP:PDX1:PHOX2A:PHOX2B:PROP1:PRRX1:PRRX2:RAX:RAX2:SEBOX:SHOX…	RYTAATTR	1	-1.56	1	12	21.43%	2082.8	16.60%
M09937_3.00:FOS:FOSB:FOSL1:FOSL2	VTGACTCAB	1	-1.559	1	6	10.71%	897.5	7.15%
M04026_3.00:ALX1:ALX3:ALX4:ARX:BARHL1:BARHL2:DRGX:ESX1:EVX1:EVX2:GBX1:GBX2:HESX1:LBX1:LBX2:MEOX1:MEOX2:MIXL1:MSX1:MSX2:PHOX2A:PHOX2B:PROP1:PRRX1:PRRX2:RAX:RAX2:SHOX:SHOX2:TLX1:TLX3:UNCX:VSX1:VSX2	TAACGAGG	1	-1.554	1	4	7.14%	529.7	4.22%
M00516_3.00:SIX1:SIX2:SIX4:SIX5	NGGTATCAN	1	-1.551	1	26	46.43%	5058	40.31%
M10992_3.00:USF1:USF2	CCACGTGH	1	-1.549	1	12	21.43%	2087.4	16.63%
M00858_3.00:KLF1:KLF12:KLF2:KLF3:KLF4:KLF5:KLF6:KLF7:KLF8	WGGGCGTGGC	1	-1.549	1	14	25.00%	2498.3	19.91%
M00307_3.00:ZNF655	NATGCTAMNN	1	-1.547	1	16	28.57%	2915.4	23.23%
M12010_3.00:IRF4:IRF8	MVNRAAANGAAA	1	-1.545	1	10	17.86%	1684.1	13.42%
M06743_3.00:BARHL1:BARHL2:EMX1:EMX2:EN1:EN2:ESX1:EVX1:EVX2:GBX1:GBX2:GSX1:GSX2:HESX1:HMX1:HMX2:HMX3:HOXA2:HOXA3:HOXA4:HOXA5:HOXB2:HOXB3:HOXB4:HOXB5:HOXC4:HOXC5:HOXD3:HOXD4:LBX1:MEOX1:MEOX2:MNX1:MSX1:MSX2:NKX1-1:NKX1-2:OTP:PDX1:RAX:RAX2:TLX1:TLX2:TLX3:VAX1:VAX2:VENTX	NTTAATTG	1	-1.543	1	8	14.29%	1288.8	10.27%
M05087_3.00:GCM1:GCM2	CACCCGCAY	1	-1.54	1	10	17.86%	1686.4	13.44%
M11535_3.00:YBX1:YBX2:YBX3	VCWGCCAATCW	1	-1.539	1	6	10.71%	903.8	7.20%
M12422_3.00:HBP1	TTCAATSAA	1	-1.536	1	4	7.14%	533	4.25%
M11943_3.00:POU2F2	TGCAAAT	1	-1.535	1	10	17.86%	1688.4	13.45%
M11408_3.00:ZBTB2	AAMAGCYCAGB	1	-1.534	1	8	14.29%	1291.4	10.29%
M11454_3.00:ZNF595	NGGGAGGGMWTC	1	-1.531	1	2	3.57%	194.4	1.55%
M00248_3.00:LEF1:TCF7:TCF7L1:TCF7L2	TTTGWTVNN	1	-1.53	1	24	42.86%	4633	36.92%
M05389_3.00:NKX6-1:NKX6-2:NKX6-3	DTAATTRH	1	-1.529	1	16	28.57%	2924.6	23.31%
M11645_3.00:FOXP3	ATAAACAA	1	-1.525	1	6	10.71%	907.5	7.23%
M10131_3.00:KLF1:KLF12:KLF2:KLF3:KLF4:KLF5:KLF6:KLF7	DGGGYGKGGCYGGG	1	-1.523	1	4	7.14%	536.4	4.27%
M11710_3.00:GATA1:GATA2:GATA3:GATA4:GATA5:GATA6	AGAGATAAKA	1	-1.523	1	4	7.14%	536.3	4.27%
M00545_3.00:CRX:DMBX1:GSC:OTX1:OTX2:TPRX1	NTAATCCNN	1	-1.52	1	16	28.57%	2929.1	23.34%
M01073_3.00:ATF1:CREB1:CREM	YGACGTCACSN	1	-1.519	1	6	10.71%	909.8	7.25%
M03249_3.00:FOXC1:FOXC2:FOXD1:FOXD2:FOXD3:FOXD4:FOXD4L1:FOXD4L3:FOXD4L4:FOXD4L5:FOXD4L6:FOXE1:FOXE3:FOXF1:FOXF2:FOXG1:FOXI1:FOXI2:FOXI3:FOXJ3:FOXL1:FOXL2:FOXS1	TRTTTAC	1	-1.517	1	12	21.43%	2101.2	16.74%
M11289_3.00:SP1:SP3:SP4:SP8:SP9	SGGGGCGGGGC	1	-1.515	1	6	10.71%	910.6	7.26%
M03092_3.00:KLF14:KLF16	GGGGGCGTGGC	1	-1.511	1	4	7.14%	539.7	4.30%
M06677_3.00:ALX1:ALX3:ALX4:ARX:BARX1:BARX2:BSX:DLX1:DLX2:DLX3:DLX4:DLX5:DLX6:DRGX:EMX1:EMX2:EN1:EN2:ESX1:EVX1:EVX2:GBX1:GBX2:GSX1:GSX2:HESX1:HMX1:HMX3:HOXA1:HOXA2:HOXA3:HOXA4:HOXA5:HOXA7:HOXB1:HOXB2:HOXB3:HOXB4:HOXB5:HOXB7:HOXC4:HOXC5:HOXD1:HOXD3:HOXD4:ISX:LHX3:LHX4:MEOX1:MEOX2:MNX1:MSX1:MSX2:NANOG:NANOGP8:NKX1-1:NKX1-2:NOTO:OTP:PDX1:PHOX2A:PHOX2B:PROP1:PRRX1:PRRX2:SHOX:SHOX2:UNCX:VAX1:VAX2:VENTX…	YTAATKA	1	-1.507	1	8	14.29%	1301.5	10.37%
M06704_3.00:ALX1:ALX3:ALX4:ARX:BARHL1:BARHL2:BARX1:BARX2:BSX:DLX1:DLX2:DLX3:DLX4:DLX5:DLX6:DRGX:EMX1:EMX2:EN1:EN2:ESX1:EVX1:EVX2:GBX1:GBX2:GSX1:GSX2:HMX1:HMX2:HMX3:HOXA1:HOXA2:HOXA3:HOXA4:HOXA5:HOXB1:HOXB2:HOXB3:HOXB4:HOXB5:HOXC12:HOXC4:HOXC5:HOXD1:HOXD3:HOXD4:LBX1:LBX2:LHX1:LHX5:MEOX1:MEOX2:MIXL1:MNX1:MSX1:MSX2:NANOG:NANOGP8:NKX1-1:NKX1-2:PDX1:PHOX2A:PHOX2B:PROP1:PRRX1:PRRX2:RAX:RAX2:SHOX:SHOX2:…	TTAATKA	1	-1.507	1	8	14.29%	1301.5	10.37%
M06763_3.00:ALX1:ALX3:ALX4:ARX:BARHL1:BARHL2:BARX1:BARX2:BSX:DLX1:DLX2:DLX3:DLX4:DLX5:DLX6:DRGX:EMX1:EMX2:EN1:EN2:ESX1:EVX1:EVX2:GBX1:GBX2:GSX1:GSX2:HESX1:HOXA1:HOXA2:HOXA3:HOXA4:HOXA5:HOXB1:HOXB2:HOXB3:HOXB4:HOXB5:HOXC4:HOXC5:HOXD1:HOXD3:HOXD4:ISX:LHX1:LHX3:LHX4:LHX5:MEOX1:MEOX2:MIXL1:MNX1:MSX1:MSX2:NANOG:NANOGP8:NKX1-1:NKX1-2:NOTO:OTP:PDX1:PHOX2A:PHOX2B:PROP1:PRRX1:PRRX2:RAX:RAX2:SEBOX:SHOX:SHO…	TTAATKA	1	-1.507	1	8	14.29%	1301.5	10.37%
M10679_3.00:GATA1:GATA2:GATA3:GATA4:GATA5:GATA6	NBWGATAAGR	1	-1.506	1	6	10.71%	913.3	7.28%
M02608_3.00:LIN54	DTTTGAAH	1	-1.504	1	18	32.14%	3359.2	26.77%
M09055_3.00:ZNF669	YGATGAC	1	-1.502	1	6	10.71%	914.8	7.29%
M05959_3.00:LEF1:TCF7:TCF7L1:TCF7L2	CTTTGATGT	1	-1.498	1	4	7.14%	542.4	4.32%
M01401_3.00:LIN54	TTYAAAWN	1	-1.497	1	24	42.86%	4653.9	37.08%
M00562_3.00:BARHL1:BARHL2:BSX:EMX1:EMX2:GBX1:GBX2:HMX1:HMX2:HMX3:HOXA4:HOXA5:HOXB4:HOXB5:HOXC4:HOXC5:HOXD4:LBX2:MEOX1:MEOX2:MNX1:MSX1:MSX2:NANOG:NANOGP8:PDX1:TLX1:TLX2:TLX3:VAX1:VAX2:VENTX	TTAATTGNYN	1	-1.496	1	8	14.29%	1305.1	10.40%
M06668_3.00:ISL1:ISL2:NOTO:SHOX:SHOX2:VSX1	YTAATKG	1	-1.496	1	8	14.29%	1305.5	10.40%
M02869_3.00:ALX1:ALX3:ALX4:ARX:BARX1:BARX2:BSX:DLX1:DLX2:DLX3:DLX4:DLX5:DLX6:DRGX:EMX1:EMX2:EN1:EN2:ESX1:EVX1:EVX2:GBX1:GBX2:GSX1:GSX2:HESX1:HMX1:HMX3:HOXA1:HOXA2:HOXA3:HOXA4:HOXA5:HOXB1:HOXB2:HOXB3:HOXB4:HOXB5:HOXC4:HOXC5:HOXD1:HOXD3:HOXD4:ISX:LHX2:LHX3:LHX4:LHX6:LHX8:LHX9:LMX1A:LMX1B:MEOX1:MIXL1:MNX1:MSX1:MSX2:NKX1-1:NKX1-2:NOBOX:NOTO:OTP:PDX1:PHOX2A:PHOX2B:PROP1:PRRX1:PRRX2:RAX:RAX2:SEBOX:SHOX…	TAATTGG	1	-1.488	1	8	14.29%	1308.2	10.42%
M02531_3.00:RFX1:RFX2:RFX3:RFX4:RFX6	BGTTGCYADG	1	-1.486	1	6	10.71%	919.5	7.33%
M05525_3.00:ALX1:ALX3:ALX4:ARX:BARHL1:BARHL2:DRGX:ESX1:GBX1:GBX2:HESX1:HMX1:HMX2:HMX3:ISX:LBX1:LBX2:MEOX1:MEOX2:MIXL1:MSX1:MSX2:PHOX2A:PHOX2B:PROP1:PRRX1:PRRX2:RAX:RAX2:SHOX:SHOX2:TLX2:UNCX:VENTX:VSX1:VSX2	TTAACGAG	1	-1.481	1	4	7.14%	546.2	4.35%
M06843_3.00:SMAD4	AYDSMCHGVCGC	1	-1.481	1	4	7.14%	546.1	4.35%
M06219_3.00:MAX	CACGTG	1	-1.48	1	12	21.43%	2118.7	16.88%
M00327_3.00:CRX:DMBX1:DPRX:GSC:GSC2:OTX1:OTX2:PITX1:PITX2:PITX3:TPRX1	NNTAATCC	1	-1.477	1	32	57.14%	6432.5	51.26%
M00903_3.00:TBX1:TBX10	AGGTGTGAANN	1	-1.477	1	4	7.14%	547.7	4.36%
M08195_3.00:ZNF10	GAGGTAGGG	1	-1.468	1	4	7.14%	549.3	4.38%
M06268_3.00:NR2C1:NR2F1:NR2F2:NR2F6:NR4A1:NR4A2:NR4A3:PPARD:RARG:RORA:RORB:RORC:RXRA:RXRB:RXRG	WAAAGGTCA	1	-1.46	1	4	7.14%	551.9	4.40%
M12258_3.00:NR2C2:NR2F1:NR2F2:NR2F6:PPARD:PPARG:RORA:RORB:RXRA:RXRB:RXRG:THRA:THRB	BYTSAGGTCAS	1	-1.458	1	10	17.86%	1720.9	13.71%
M09888_3.00:MITF:TFE3:TFEB:TFEC	RGTCACGTGR	1	-1.457	1	6	10.71%	929	7.40%
M10547_3.00:STAT4	TTTCCYGGAA	1	-1.457	1	6	10.71%	928.9	7.40%
M10601_3.00:ARNTL	GNCACGTG	1	-1.457	1	6	10.71%	928.7	7.40%
M01832_3.00:TCF12:TCF3:TCF4	VCAGGTGBN	1	-1.456	1	26	46.43%	5115.3	40.76%
M02181_3.00:HESX1:MIXL1:PROP1	NNYAATCAD	1	-1.455	1	16	28.57%	2963.8	23.62%
M10873_3.00:TFAP2A:TFAP2B:TFAP2C:TFAP2D:TFAP2E	GCBNVGGSCYGVGGGS	1	-1.452	1	4	7.14%	553.5	4.41%
M01224_3.00:NFE2:NFE2L1:NFE2L2:NFE2L3	NHGTCATNN	1	-1.45	1	32	57.14%	6449.3	51.39%
M00199_3.00:OSR1:OSR2	ACRGTAGCN	1	-1.445	1	18	32.14%	3392.1	27.03%
M00513_3.00:ISL1:ISL2:NOTO:SHOX:SHOX2:VSX1	NTAATDG	1	-1.442	1	36	64.29%	7357.4	58.63%
M02622_3.00:THAP12	CNKGCCGGCTN	1	-1.437	1	10	17.86%	1729.7	13.78%
M02916_3.00:SOX1:SOX10:SOX11:SOX12:SOX13:SOX14:SOX15:SOX17:SOX18:SOX2:SOX21:SOX3:SOX30:SOX4:SOX5:SOX6:SOX7:SOX8:SOX9:SRY	CCATTGTT	1	-1.436	1	6	10.71%	935.2	7.45%
M08264_3.00:TCF12:TCF3:TCF4	RCACCTGG	1	-1.432	1	16	28.57%	2975.7	23.71%
M02015_3.00:DMRT1:DMRT3:DMRTA2:DMRTC2	HNGATACAWW	1	-1.43	1	10	17.86%	1732.8	13.81%
M11847_3.00:CDX1:CDX2:CDX4	TTTATD	1	-1.427	1	18	32.14%	3402.1	27.11%
M00574_3.00:ALX1:ALX3:ALX4:ARX:BARX1:BARX2:BSX:DLX1:DLX2:DLX3:DLX4:DLX5:DLX6:DRGX:EMX1:EMX2:EN1:EN2:ESX1:EVX1:EVX2:GBX1:GBX2:GSX1:GSX2:HESX1:HMX1:HMX3:HOXA1:HOXA2:HOXA3:HOXA4:HOXA5:HOXB1:HOXB2:HOXB3:HOXB4:HOXB5:HOXC4:HOXC5:HOXD1:HOXD3:HOXD4:ISX:LHX2:LHX3:LHX4:LHX6:LHX8:LHX9:LMX1A:LMX1B:MEOX1:MIXL1:MNX1:MSX1:MSX2:NKX1-1:NKX1-2:NOBOX:NOTO:OTP:PDX1:PHOX2A:PHOX2B:PROP1:PRRX1:PRRX2:RAX:RAX2:SEBOX:SHOX…	NYAATYA	1	-1.425	1	28	50.00%	5575.8	44.43%
M06745_3.00:BARHL1:BARHL2:EMX1:EMX2:EN1:EN2:ESX1:EVX1:EVX2:GBX1:GBX2:GSX1:GSX2:HESX1:HMX1:HMX2:HMX3:HOXA2:HOXA3:HOXA4:HOXA5:HOXB2:HOXB3:HOXB4:HOXB5:HOXC4:HOXC5:HOXD3:HOXD4:LBX1:MEOX1:MEOX2:MNX1:MSX1:MSX2:NKX1-1:NKX1-2:OTP:PDX1:RAX:RAX2:TLX1:TLX2:TLX3:VAX1:VAX2:VENTX	TTAATTR	1	-1.416	1	8	14.29%	1335.8	10.64%
M04714_3.00:ZNF281	CGGGGGAGGGGC	1	-1.415	1	4	7.14%	562.6	4.48%
M11938_3.00:PAX4	DTTTTCCACCY	1	-1.415	1	4	7.14%	562.5	4.48%
M05043_3.00:FOXC1:FOXC2:FOXD1:FOXD2:FOXD3:FOXD4:FOXD4L1:FOXD4L3:FOXD4L4:FOXD4L5:FOXD4L6:FOXE1:FOXG1:FOXI1:FOXI2:FOXI3:FOXJ3:FOXK2:FOXL1:FOXL2:FOXS1	GTGTTTGYGTB	1	-1.414	1	6	10.71%	942.7	7.51%
M00305_3.00:ZNF655	NATGCTAMNN	1	-1.414	1	16	28.57%	2985.3	23.79%
M08175_3.00:ZNF468	DGGGAGGGGGYG	1	-1.411	1	4	7.14%	563.8	4.49%
M00877_3.00:MECP2	NNGTGWNNNN	1	-1.411	1	52	92.86%	11160.3	88.93%
M04772_3.00:HIC1	GGTKGGCAYR	1	-1.41	1	12	21.43%	2151.7	17.15%
M01765_3.00:ASH1L:HMGA1:HMGA2:SETBP1:SRCAP	NRNWWWWNYN	1	-1.408	1	8	14.29%	1338.8	10.67%
M08937_3.00:NFKB1:RELA:RELB	GGGGAAT	1	-1.407	1	4	7.14%	564.7	4.50%
M09425_3.00:MAZ	GGGAGGGGG	1	-1.4	1	10	17.86%	1745.9	13.91%
M08963_3.00:TEAD2:TEAD3:TEAD4	ACATTCC	1	-1.4	1	4	7.14%	566.8	4.52%
M01225_3.00:CREB3L1:CREB3L2:CREB3L4	KACGTGGC	1	-1.396	1	6	10.71%	948.3	7.56%
M04512_3.00:BATF:BATF3	CGTGTCATKN	1	-1.396	1	6	10.71%	948.1	7.56%
M09195_3.00:ZNF721	AAAAAAAAAAAGCWNWH	1	-1.392	1	4	7.14%	568.9	4.53%
M12236_3.00:HNF4A:HNF4G:NR2E1:NR2F1:NR2F2:NR2F6:NR6A1:RXRB:RXRG	AGKTCA	1	-1.392	1	44	78.57%	9236	73.60%
M06741_3.00:MEIS1:MEIS2:MEIS3:PKNOX1:PKNOX2:TGIF1:TGIF2:TGIF2LX:TGIF2LY	TTTGACA	1	-1.379	1	10	17.86%	1754	13.98%
M06732_3.00:SIX1:SIX2:SIX4:SIX5	WWDTGATA	1	-1.378	1	22	39.29%	4291.5	34.20%
M12516_3.00:TBP:TBPL2	THTTTATAT	1	-1.377	1	6	10.71%	954.8	7.61%
M11685_3.00:FOXO4	ATAAACAANYH	1	-1.374	1	6	10.71%	955.5	7.61%
M06681_3.00:NKX2-1:NKX2-2:NKX2-3:NKX2-4:NKX2-5:NKX2-6:NKX2-8	TCTCAAGTGGCN	1	-1.37	1	2	3.57%	217.9	1.74%
M05085_3.00:GCM1:GCM2	YACCCGCAT	1	-1.368	1	4	7.14%	574.2	4.58%
M08566_3.00:ZNF512B	ARRGAAAGAAAGARA	1	-1.365	1	4	7.14%	575.5	4.59%
M00727_3.00:SIX1:SIX2:SIX4:SIX5	NYKATACYNN	1	-1.363	1	14	25.00%	2591.5	20.65%
M06207_3.00:MITF:TFE3	NATCACGTGA	1	-1.36	1	6	10.71%	960.2	7.65%
M06029_3.00:TEAD1:TEAD3:TEAD4	CRCATWCCR	1	-1.357	1	6	10.71%	961.4	7.66%
M02044_3.00:E2F1:E2F2:E2F3:E2F4:E2F5:E2F6	WTGGCGCCAW	1	-1.349	1	4	7.14%	579.9	4.62%
M11714_3.00:GATA1:GATA2:GATA3:GATA4:GATA5:GATA6	AGATAAV	1	-1.344	1	14	25.00%	2601.8	20.73%
M00386_3.00:HOXA4:HOXA5:HOXA6:HOXA7:HOXB5:HOXB6:HOXB7:HOXB8:HOXC5:HOXC6:HOXC8:HOXD4:HOXD8	NNNHHAY	1	-1.343	1	56	100.00%	12251.7	97.63%
M09437_3.00:EGR1:EGR2:EGR3:EGR4	GCGGGGGCG	1	-1.339	1	6	10.71%	967.2	7.71%
M11138_3.00:MAF:MAFA:MAFB:MAFG:MAFK	GASTCAGCA	1	-1.338	1	2	3.57%	222.1	1.77%
M02043_3.00:E2F1:E2F2:E2F3:E2F4:E2F5:E2F6	WDGGCGCCHW	1	-1.334	1	4	7.14%	583.3	4.65%
M12562_3.00:NFE4	CHCCCTCGCCAG	1	-1.333	1	6	10.71%	969.2	7.72%
M10186_3.00:ELF1:ELF2:ELF4:ELK1:ELK3:ELK4:ERF:ERG:ETS1:ETS2:ETV1:ETV2:ETV3:ETV3L:ETV4:ETV5:FEV:FLI1:GABPA	RRGSAGGAAGTGRR	1	-1.327	1	6	10.71%	971.7	7.74%
M01389_3.00:RUNX1:RUNX2:RUNX3	TTGCGGTTWN	1	-1.327	1	4	7.14%	585.1	4.66%
M06842_3.00:SMAD1:SMAD3:SMAD5:SMAD9	GCGHCGSCVG	1	-1.327	1	4	7.14%	585.5	4.67%
M12528_3.00:TEAD1:TEAD3:TEAD4	CATTCC	1	-1.325	1	6	10.71%	972.6	7.75%
M09677_3.00:FOXP3	TTGTTTAT	1	-1.324	1	10	17.86%	1779.8	14.18%
M08547_3.00:ZNF366	AWGGATGGAWGGATG	1	-1.319	1	2	3.57%	225.5	1.80%
M12300_3.00:ESR1:ESR2:NR1D1:NR1D2:NR1H2:NR1H3:NR1H4:NR2C1:NR2C2:NR2F1:NR2F2:NR2F6:NR4A1:NR6A1:PPARA:PPARD:PPARG:RARA:RARB:RARG:RORA:RORB:RORC:RXRA:RXRB:RXRG:THRA	AAAGGTCAS	1	-1.308	1	12	21.43%	2201	17.54%
M08123_3.00:ZNF124	CCAAGGAAGAAG	1	-1.307	1	2	3.57%	227.8	1.82%
M01307_3.00:E2F1:E2F2:E2F3:E2F4:E2F5:E2F6	WWWDGGCGCS	1	-1.304	1	4	7.14%	591.1	4.71%
M05492_3.00:SIX1:SIX2:SIX4:SIX5	VCGTATCRYN	1	-1.304	1	6	10.71%	979.7	7.81%
M11062_3.00:ATF2	VVVTGACGTMAD	1	-1.304	1	6	10.71%	979.1	7.80%
M04359_3.00:HEY1	BGCRCGTGTB	1	-1.302	1	6	10.71%	980.4	7.81%
M01089_3.00:FOXN2:FOXN3	WRGCGTCNH	1	-1.301	1	22	39.29%	4340.9	34.59%
M11272_3.00:KLF1:KLF12:KLF2:KLF3:KLF4:KLF5:KLF6:KLF7:KLF8	RGGGMGGGGS	1	-1.3	1	20	35.71%	3907.1	31.13%
M09829_3.00:TFAP2A:TFAP2B:TFAP2C:TFAP2D:TFAP2E	BGSCCTGRGGCCR	1	-1.299	1	6	10.71%	981.1	7.82%
M10157_3.00:E2F1:E2F2:E2F3:E2F4:E2F5:E2F6	RGGGCGGGARRRR	1	-1.297	1	4	7.14%	593.6	4.73%
M10032_3.00:GFI1:GFI1B	GCTGWGATTT	1	-1.293	1	6	10.71%	984	7.84%
M00885_3.00:HNF4A:HNF4G:NR2E1	NRAGTCANNN	1	-1.292	1	42	75.00%	8830.6	70.37%
M05192_3.00:BARHL1:BARHL2:BARX1:BARX2:BSX:DLX2:DLX3:EMX1:EMX2:ESX1:EVX1:EVX2:GBX1:GBX2:HESX1:HMX1:HMX2:HMX3:HOXA1:HOXA2:HOXA3:HOXA4:HOXA5:HOXB1:HOXB2:HOXB3:HOXB4:HOXB5:HOXC4:HOXC5:HOXD1:HOXD12:HOXD3:HOXD4:LBX1:LBX2:MEOX1:MEOX2:MNX1:MSX1:MSX2:NANOG:NANOGP8:NKX1-1:NKX1-2:PDX1:RAX:RAX2:TLX1:TLX3:VENTX	WTAATGAB	1	-1.291	1	24	42.86%	4783.1	38.11%
M11305_3.00:BCL6	CTTYCTAGRA	1	-1.287	1	6	10.71%	985	7.85%
M04252_3.00:TFAP2A:TFAP2B:TFAP2C:TFAP2D:TFAP2E	NSCCKNRGGSD	1	-1.286	1	24	42.86%	4786.2	38.14%
M09172_3.00:ZFP3	AAWRAAMAAGTTN	1	-1.279	1	4	7.14%	598.9	4.77%
M11244_3.00:REST	GGACAGCKC	1	-1.279	1	4	7.14%	598.6	4.77%
M10516_3.00:LEF1:TCF7:TCF7L1:TCF7L2	CMCAGCTGCH	1	-1.277	1	12	21.43%	2217.5	17.67%
M08398_3.00:E2F1:E2F2:E2F3:E2F4:E2F5:E2F6	NGGGCGGGAAR	1	-1.277	1	8	14.29%	1391.3	11.09%
M06171_3.00:ZBTB8B	YCGGGTAYNNNNNNN	1	-1.268	1	4	7.14%	601.2	4.79%
M11102_3.00:ATF3:JDP2	SCTGACGYMAT	1	-1.265	1	12	21.43%	2223.7	17.72%
M10954_3.00:TWIST1:TWIST2	MHACACMTGGD	1	-1.264	1	10	17.86%	1807.8	14.41%
M06631_3.00:ALX1:ALX3:ALX4:ARX:BARHL1:BARHL2:BARX1:BARX2:BSX:DRGX:EMX1:EMX2:EN1:EN2:ESX1:EVX1:EVX2:GBX1:GBX2:GSX1:GSX2:HESX1:HMX1:HMX2:HMX3:HOXA1:HOXA2:HOXA3:HOXA4:HOXA5:HOXB1:HOXB2:HOXB3:HOXB4:HOXB5:HOXC4:HOXC5:HOXD3:HOXD4:LHX2:LHX3:LHX4:LHX9:MEOX1:MEOX2:MIXL1:MNX1:MSX1:MSX2:NKX1-1:NKX1-2:NOTO:OTP:PDX1:PHOX2A:PHOX2B:PROP1:PRRX1:PRRX2:RAX:RAX2:SEBOX:SHOX:SHOX2:TLX1:TLX2:TLX3:UNCX:VAX1:VAX2:VENTX:…	YTAATTA	1	-1.26	1	8	14.29%	1398.5	11.14%
M04020_3.00:ALX1:ALX3:ALX4:ARX:BARHL1:BARHL2:DRGX:ESX1:EVX1:EVX2:GBX1:GBX2:HESX1:LBX1:LBX2:MEOX1:MEOX2:MIXL1:MSX1:MSX2:PHOX2A:PHOX2B:PROP1:PRRX1:PRRX2:RAX:RAX2:SHOX:SHOX2:TLX1:TLX3:UNCX:VSX1:VSX2	DTAACRAGS	1	-1.258	1	4	7.14%	604.7	4.82%
M00547_3.00:BARX1:BARX2:BSX:DLX1:DLX2:DLX3:DLX4:DLX5:DLX6:EN1:EN2:EVX1:EVX2:GBX1:GBX2:GSX1:GSX2:HOXA1:HOXA2:HOXA3:HOXA4:HOXA5:HOXB1:HOXB2:HOXB3:HOXB4:HOXB5:HOXC4:HOXC5:HOXD1:HOXD3:HOXD4:MEOX1:MEOX2:MNX1:MSX1:MSX2:NANOG:NANOGP8:NKX1-1:NKX1-2:PDX1:VAX1:VAX2:VENTX	NBYVATTA	1	-1.255	1	30	53.57%	6133.7	48.88%
M00228_3.00:IRF9	ANCGAAACY	1	-1.252	1	10	17.86%	1813.3	14.45%
M02615_3.00:LIN54	NNDTYRAAN	1	-1.249	1	26	46.43%	5251.9	41.85%
M02178_3.00:ANHX	CTTGTCAA	1	-1.246	1	6	10.71%	1001	7.98%
M00424_3.00:NR2E3	MGGGATCAAN	1	-1.244	1	4	7.14%	608.2	4.85%
M08559_3.00:ZNF600	TGTTCTGGARB	1	-1.241	1	6	10.71%	1002.8	7.99%
M06258_3.00:ALX1:ALX3:ALX4:ARX:BARX1:BARX2:BSX:DLX1:DLX2:DLX3:DLX4:DLX5:DLX6:DRGX:EMX1:EMX2:EN1:EN2:ESX1:EVX1:EVX2:GBX1:GBX2:GSX1:GSX2:HESX1:HMX1:HMX3:HOXA1:HOXA2:HOXA3:HOXA4:HOXA5:HOXB1:HOXB2:HOXB3:HOXB4:HOXB5:HOXC4:HOXC5:HOXD1:HOXD3:HOXD4:ISX:LHX2:LHX3:LHX4:LHX6:LHX8:LHX9:LMX1A:LMX1B:MEOX1:MIXL1:MNX1:MSX1:MSX2:NKX1-1:NKX1-2:NOBOX:NOTO:OTP:PDX1:PHOX2A:PHOX2B:PROP1:PRRX1:PRRX2:RAX:RAX2:SEBOX:SHOX…	RYTAATTA	1	-1.24	1	4	7.14%	609.4	4.86%
M11811_3.00:HOXA10:HOXA11:HOXA6:HOXA9:HOXB6:HOXB8:HOXB9:HOXC10:HOXC11:HOXC12:HOXC6:HOXC8:HOXC9:HOXD10:HOXD11:HOXD12:HOXD8:HOXD9	KAATAAAA	1	-1.239	1	8	14.29%	1407.5	11.22%
M10893_3.00:ASH1L:HMGA1:HMGA2:SETBP1:SRCAP	DAANAA	1	-1.237	1	48	85.71%	10269	81.83%
M10930_3.00:HIF1A	VNACGTGC	1	-1.235	1	16	28.57%	3087.3	24.60%
M08695_3.00:ATF1:CREB1:CREM	TGACATCA	1	-1.23	1	6	10.71%	1006.3	8.02%
M10994_3.00:LYL1:TAL1:TAL2	CAGATGG	1	-1.225	1	18	32.14%	3523.9	28.08%
M10581_3.00:TCF12:TCF3:TCF4	VCAGCTGYTG	1	-1.224	1	6	10.71%	1008.9	8.04%
M02956_3.00:EOMES:TBR1:TBX21:TBX5	AGGTGTGAA	1	-1.223	1	4	7.14%	614.7	4.90%
M10962_3.00:MYF5:MYOD1:MYOG	NGACAGSTG	1	-1.222	1	16	28.57%	3095.3	24.67%
M06720_3.00:BARHL1:BARHL2:BSX:EMX1:EMX2:EN1:EN2:GSX1:GSX2:HMX1:HMX2:HMX3:HOXA3:HOXA4:HOXA5:HOXB3:HOXB4:HOXB5:HOXC4:HOXC5:HOXD3:HOXD4:MEOX2:NKX1-1:NKX1-2:NKX6-1:NKX6-2:NKX6-3:NOBOX:PDX1:TLX1:TLX2:TLX3:VAX1:VAX2	TTAATTG	1	-1.221	1	8	14.29%	1415.2	11.28%
M02550_3.00:GMEB1:GMEB2	NNTRCGTVN	1	-1.22	1	38	67.86%	7960.4	63.43%
M03759_3.00:TBX15:TBX18:TBX20:TBX22	AGGTGTGA	1	-1.216	1	4	7.14%	616.5	4.91%
M05203_3.00:HOXA10:HOXA4:HOXA5:HOXA6:HOXA7:HOXA9:HOXB4:HOXB5:HOXB6:HOXB7:HOXB8:HOXB9:HOXC10:HOXC4:HOXC5:HOXC6:HOXC8:HOXC9:HOXD10:HOXD4:HOXD8:HOXD9:MNX1:PDX1	BTAATTRC	1	-1.214	1	8	14.29%	1418.7	11.31%
M08947_3.00:SOX1:SOX10:SOX11:SOX12:SOX13:SOX14:SOX15:SOX17:SOX18:SOX2:SOX21:SOX3:SOX30:SOX4:SOX5:SOX6:SOX7:SOX8:SOX9:SRY	CCATTGT	1	-1.214	1	6	10.71%	1012.2	8.07%
M12358_3.00:REL:RELA	GGAAAKCCCC	1	-1.213	1	4	7.14%	617.4	4.92%
M10628_3.00:MAZ	GGGGGGGG	1	-1.208	1	14	25.00%	2677.1	21.33%
M00241_3.00:RFX1:RFX2:RFX3:RFX4:RFX6	GTTGCYADGS	1	-1.202	1	12	21.43%	2257.4	17.99%
M08611_3.00:FOXA1:FOXA2:FOXA3:FOXB1	TGTTTRCTTW	1	-1.199	1	4	7.14%	621.9	4.96%
M02902_3.00:REL:RELA	GGAAAKCCCC	1	-1.193	1	4	7.14%	623.5	4.97%
M06630_3.00:ALX1:ALX3:ALX4:ARX:BARHL1:BARHL2:BARX1:BARX2:BSX:DRGX:EMX1:EMX2:EN1:EN2:ESX1:EVX1:EVX2:GBX1:GBX2:GSX1:GSX2:HESX1:HMX1:HMX2:HMX3:HOXA1:HOXA2:HOXA3:HOXA4:HOXA5:HOXB1:HOXB2:HOXB3:HOXB4:HOXB5:HOXC4:HOXC5:HOXD3:HOXD4:LHX2:LHX3:LHX4:LHX9:MEOX1:MEOX2:MIXL1:MNX1:MSX1:MSX2:NKX1-1:NKX1-2:NOTO:OTP:PDX1:PHOX2A:PHOX2B:PROP1:PRRX1:PRRX2:RAX:RAX2:SEBOX:SHOX:SHOX2:TLX1:TLX2:TLX3:UNCX:VAX1:VAX2:VENTX:…	TGTCATHA	1	-1.181	1	12	21.43%	2268.8	18.08%
M10375_3.00:BORCS8-MEF2B:MEF2A:MEF2B:MEF2C:MEF2D	DKCTATTTTTAGCH	1	-1.179	1	4	7.14%	627.7	5.00%
M04336_3.00:HEY1:HEY2:HEYL	BGCACGTGTV	1	-1.172	1	6	10.71%	1028.8	8.20%
M06291_3.00:AKNA	KGGTKGKGKTGGKKB	1	-1.169	1	6	10.71%	1029	8.20%
M12559_3.00:PURA	CHCTGBCCC	1	-1.165	1	36	64.29%	7545.1	60.12%
M02331_3.00:HSF1:HSF2:HSF4	NNNTTCYAYN	1	-1.162	1	30	53.57%	6200.9	49.41%
M02165_3.00:ALX1:ALX3:ALX4:ARX:BARHL1:BARHL2:BARX1:BARX2:BSX:DLX1:DLX2:DLX3:DLX4:DLX5:DLX6:DRGX:EMX1:EMX2:EN1:EN2:ESX1:EVX1:EVX2:GBX1:GBX2:GSX1:GSX2:HESX1:HOXA1:HOXA2:HOXA3:HOXA4:HOXA5:HOXB1:HOXB2:HOXB3:HOXB4:HOXB5:HOXC4:HOXC5:HOXD1:HOXD3:HOXD4:ISX:LHX1:LHX3:LHX4:LHX5:MEOX1:MEOX2:MIXL1:MNX1:MSX1:MSX2:NANOG:NANOGP8:NKX1-1:NKX1-2:NOTO:OTP:PDX1:PHOX2A:PHOX2B:PROP1:PRRX1:PRRX2:RAX:RAX2:SEBOX:SHOX:SHO…	NNTAATKAN	1	-1.162	1	26	46.43%	5313.6	42.34%
M11271_3.00:KLF1:KLF12:KLF3:KLF5:KLF8	HMSDGGGTGT	1	-1.161	1	10	17.86%	1858	14.81%
M12012_3.00:IRF4:IRF8	GAAARTA	1	-1.155	1	12	21.43%	2283.6	18.20%
M05299_3.00:SIX1:SIX2:SIX4:SIX5	VCGTATCRBN	1	-1.154	1	6	10.71%	1035.4	8.25%
M01900_3.00:CEBPA:CEBPB:CEBPE	RTTRCGCAAY	1	-1.153	1	4	7.14%	635.3	5.06%
M04274_3.00:TFAP4	AMCATATGKT	1	-1.153	1	4	7.14%	635.2	5.06%
M11394_3.00:ZBTB33	AACCTCG	1	-1.15	1	4	7.14%	636.2	5.07%
M12310_3.00:ESR1:ESR2:NR1D1:NR1D2:NR1H2:NR1H3:NR1H4:NR2C1:NR2C2:NR2F1:NR2F2:NR2F6:NR4A1:NR4A2:NR4A3:NR5A1:NR5A2:NR6A1:PPARA:PPARD:PPARG:RARA:RARB:RARG:RORA:RORB:RORC:RXRA:RXRB:RXRG:THRA:THRB	TRGGTCA	1	-1.147	1	4	7.14%	637.3	5.08%
M06114_3.00:MYF5:MYF6:MYOG	NBRWCAGBTGHB	1	-1.144	1	10	17.86%	1867.9	14.88%
M09460_3.00:ZNF22	AAAAAAAAA	1	-1.144	1	4	7.14%	638.7	5.09%
M06281_3.00:SOX1:SOX10:SOX11:SOX12:SOX13:SOX14:SOX15:SOX17:SOX18:SOX2:SOX21:SOX3:SOX30:SOX4:SOX5:SOX6:SOX7:SOX8:SOX9:SRY	NCYATTGTTW	1	-1.141	1	6	10.71%	1040.1	8.29%
M12444_3.00:LEF1:TCF7:TCF7L1:TCF7L2	DCATCAAAGB	1	-1.137	1	4	7.14%	640.8	5.11%
M02108_3.00:GCM2	RCCCGCAT	1	-1.136	1	6	10.71%	1042.1	8.30%
M06263_3.00:NR1H2:NR1H3:NR1H4:NR2C1:NR2C2:NR2F1:NR2F2:NR2F6:RARA:RARB:RARG:RORA:RORB:RORC:RXRA:RXRB:RXRG:VDR	KAGGTCAWHKD	1	-1.136	1	6	10.71%	1042.9	8.31%
M12537_3.00:THAP1	TTGCCMRTAST	1	-1.134	1	2	3.57%	258.7	2.06%
M11396_3.00:ZBTB7A	GGGGGCCCB	1	-1.133	1	20	35.71%	4017.1	32.01%
M10995_3.00:LYL1:TAL1:TAL2	AGCAGMTGGA	1	-1.115	1	4	7.14%	647.9	5.16%
M00265_3.00:SOX1:SOX10:SOX11:SOX12:SOX13:SOX14:SOX15:SOX17:SOX18:SOX2:SOX21:SOX3:SOX30:SOX4:SOX5:SOX6:SOX7:SOX8:SOX9:SRY	ATTGTYHNN	1	-1.113	1	26	46.43%	5349.6	42.63%
M12064_3.00:BORCS8-MEF2B:MEF2A:MEF2B:MEF2C:MEF2D	GVDYTAAAAATAG	1	-1.112	1	4	7.14%	648	5.16%
M01587_3.00:ALX1:ALX3:ALX4:ARX:DRGX:EMX1:EMX2:EN1:EN2:ESX1:GBX1:GBX2:HESX1:ISX:LHX1:LHX2:LHX3:LHX4:LHX5:LHX6:LHX8:LHX9:LMX1A:LMX1B:MIXL1:MSX1:MSX2:NOBOX:NOTO:OTP:PHOX2A:PHOX2B:PROP1:PRRX1:PRRX2:RAX:RAX2:SEBOX:SHOX:SHOX2:UNCX:VAX1:VAX2:VSX1:VSX2:ZFHX2	HTAATDARB	1	-1.112	1	10	17.86%	1884.6	15.02%
M00369_3.00:CRX:DMBX1:DPRX:GSC:GSC2:OTX1:OTX2:PITX1:PITX2:PITX3:TPRX1	HTAATCCH	1	-1.109	1	16	28.57%	3166.3	25.23%
M00249_3.00:HBP1	YCATTSWN	1	-1.108	1	34	60.71%	7136.7	56.87%
M10801_3.00:ALX1:ALX3:ALX4:ARX:BARHL1:BARHL2:BARX1:BARX2:BSX:DLX1:DLX2:DLX3:DLX4:DLX5:DLX6:DRGX:EMX1:EMX2:EN1:EN2:ESX1:EVX1:EVX2:GBX1:GBX2:GSX1:GSX2:HESX1:HOXA1:HOXA2:HOXA3:HOXA4:HOXA5:HOXB1:HOXB2:HOXB3:HOXB4:HOXB5:HOXC4:HOXC5:HOXD1:HOXD3:HOXD4:ISX:LHX1:LHX3:LHX4:LHX5:MEOX1:MEOX2:MIXL1:MNX1:MSX1:MSX2:NANOG:NANOGP8:NKX1-1:NKX1-2:NOTO:OTP:PDX1:PHOX2A:PHOX2B:PROP1:PRRX1:PRRX2:RAX:RAX2:SEBOX:SHOX:SHO…	TKTTAATKA	1	-1.107	1	8	14.29%	1467.4	11.69%
M08153_3.00:ZNF790	GTGCAGCA	1	-1.106	1	4	7.14%	650	5.18%
M02104_3.00:GCM1:GCM2	RCCCGCATNN	1	-1.104	1	10	17.86%	1888.1	15.05%
M00252_3.00:SOX1:SOX10:SOX11:SOX12:SOX13:SOX14:SOX15:SOX17:SOX18:SOX2:SOX21:SOX3:SOX30:SOX4:SOX5:SOX6:SOX7:SOX8:SOX9:SRY	ATTGTTHN	1	-1.104	1	30	53.57%	6244.9	49.76%
M09013_3.00:HNF4A:HNF4G:NR2E1:NR2F1:NR2F2:NR2F6:NR6A1:RXRB:RXRG	AGTCCA	1	-1.096	1	16	28.57%	3175.4	25.30%
M02543_3.00:GMEB1:GMEB2	NNTRCGTVV	1	-1.093	1	38	67.86%	8051.7	64.16%
M12407_3.00:SMAD1:SMAD3:SMAD9	STGTCTG	1	-1.088	1	24	42.86%	4927	39.26%
M00582_3.00:GSC:TPRX1	HTAATCYN	1	-1.088	1	16	28.57%	3180.7	25.35%
M00799_3.00:SOX1:SOX10:SOX11:SOX12:SOX13:SOX14:SOX15:SOX17:SOX18:SOX2:SOX21:SOX3:SOX30:SOX4:SOX5:SOX6:SOX7:SOX8:SOX9:SRY	NATTGTTH	1	-1.088	1	10	17.86%	1897.4	15.12%
M00326_3.00:CRX:DMBX1:DPRX:GSC:GSC2:OTX1:OTX2:PITX1:PITX2:PITX3:TPRX1	NTAATCC	1	-1.087	1	30	53.57%	6257.1	49.86%
M10881_3.00:TFAP2A:TFAP2B:TFAP2C:TFAP2D:TFAP2E	NGCCYGSGGCS	1	-1.086	1	10	17.86%	1898.7	15.13%
M05974_3.00:SOX1:SOX10:SOX11:SOX12:SOX13:SOX14:SOX15:SOX17:SOX18:SOX2:SOX21:SOX3:SOX30:SOX4:SOX5:SOX6:SOX7:SOX8:SOX9:SRY	CCATTGTTMN	1	-1.085	1	6	10.71%	1063.8	8.48%
M02941_3.00:FOXC2:FOXD1:FOXD2:FOXD3:FOXG1:FOXI1:FOXI2:FOXI3:FOXJ2:FOXJ3:FOXK1:FOXK2:FOXP1:FOXP3	TTGTTTAT	1	-1.085	1	4	7.14%	657.6	5.24%
M11638_3.00:EHF:ELF1:ELF2:ELF3:ELF4:ELF5:ETV6:ETV7	CCCGGAARTA	1	-1.083	1	6	10.71%	1064.4	8.48%
M01188_3.00:ASH1L:HMGA1:HMGA2:SETBP1:SRCAP	AAAWAAAT	1	-1.081	1	20	35.71%	4054.9	32.31%
M05444_3.00:ALX1:ALX3:ALX4:ARX:BARHL1:BARHL2:BARX1:BARX2:BSX:DLX1:DLX2:DLX3:DLX4:DLX5:DLX6:DRGX:EMX1:EMX2:EN1:EN2:ESX1:EVX1:EVX2:GBX1:GBX2:GSX1:GSX2:HESX1:HOXA1:HOXA2:HOXA3:HOXB1:HOXB2:HOXB3:HOXD3:ISX:LBX1:LBX2:LHX1:LHX2:LHX3:LHX4:LHX5:LHX6:LHX8:LHX9:LMX1A:LMX1B:MEOX1:MIXL1:MNX1:MSX1:MSX2:NKX1-1:NKX1-2:NOBOX:NOTO:OTP:PDX1:PHOX2A:PHOX2B:PROP1:PRRX1:PRRX2:RAX:RAX2:SEBOX:SHOX:SHOX2:UNCX:VAX1:VAX2:VS…	CTAATTRM	1	-1.079	1	8	14.29%	1481.4	11.81%
M00579_3.00:BARHL1:BARHL2:BSX:DLX2:EMX1:EMX2:EN1:EN2:GBX1:GBX2:GSX1:GSX2:HMX1:HMX2:HMX3:HOXA3:HOXA4:HOXA5:HOXB3:HOXB4:HOXB5:HOXC4:HOXC5:HOXD3:HOXD4:LBX2:MEOX1:MEOX2:MNX1:MSX1:MSX2:NANOG:NANOGP8:NKX1-1:NKX1-2:PDX1:TLX1:TLX2:TLX3:VAX1:VAX2:VENTX	TTAATTGNBN	1	-1.077	1	8	14.29%	1482.3	11.81%
M10051_3.00:ZBTB18	CMACAKCTGGA	1	-1.075	1	4	7.14%	660.8	5.27%
M11327_3.00:RREB1	GRGWGGGGTTGGGGGG	1	-1.075	1	2	3.57%	270.2	2.15%
M10380_3.00:MECP2	YYCCGGG	1	-1.074	1	8	14.29%	1483.7	11.82%
M10382_3.00:MECP2	YYCCGGG	1	-1.074	1	8	14.29%	1483.7	11.82%
M11341_3.00:KLF1:KLF12:KLF2:KLF3:KLF4:KLF5:KLF6:KLF7	NSNRGGNGKGGGN	1	-1.067	1	20	35.71%	4064.9	32.39%
M06624_3.00:BARX1:BARX2:BSX:EMX1:EMX2:EN1:EN2:EVX1:EVX2:GBX1:GBX2:GSX1:GSX2:HESX1:HMX1:HMX2:HMX3:HOXA1:HOXA2:HOXA3:HOXA4:HOXA5:HOXA6:HOXA7:HOXB1:HOXB2:HOXB3:HOXB4:HOXB5:HOXB6:HOXB7:HOXB8:HOXC4:HOXC5:HOXC6:HOXD1:HOXD3:HOXD4:HOXD8:ISX:MEOX1:MEOX2:MNX1:NKX1-1:NKX1-2:NOTO:OTP:PDX1:TLX1:TLX3:VAX1:VAX2:VENTX	NYTAATGA	1	-1.064	1	8	14.29%	1488.6	11.86%
M06724_3.00:SIX3:SIX6	DNRTGATA	1	-1.064	1	10	17.86%	1910.6	15.22%
M04266_3.00:SREBF1:SREBF2	GTGGCGTGAY	1	-1.064	1	6	10.71%	1072	8.54%
M06689_3.00:ALX1:ALX3:ALX4:ARX:BARHL1:BARHL2:BARX1:BARX2:BSX:DRGX:EMX1:EMX2:EN1:EN2:ESX1:EVX1:EVX2:GBX1:GBX2:GSX1:GSX2:HESX1:HMX1:HMX2:HMX3:HOXA1:HOXA2:HOXA3:HOXA4:HOXA5:HOXB1:HOXB2:HOXB3:HOXB4:HOXB5:HOXC4:HOXC5:HOXD3:HOXD4:ISX:LHX2:LHX3:LHX4:LHX9:MEOX1:MEOX2:MIXL1:MNX1:MSX1:MSX2:NKX1-1:NKX1-2:NOTO:OTP:PDX1:PHOX2A:PHOX2B:PROP1:PRRX1:PRRX2:RAX:RAX2:SEBOX:SHOX:SHOX2:TLX1:TLX2:TLX3:UNCX:VAX1:VAX2:VE…	NYTAATKA	1	-1.062	1	8	14.29%	1490	11.87%
M08593_3.00:GATAD2A	AGATAAGV	1	-1.061	1	6	10.71%	1073.9	8.56%
M04642_3.00:EGR1:EGR2:EGR3:EGR4	GBGCGTGGGCGGG	1	-1.058	1	4	7.14%	666.9	5.31%
M06610_3.00:ALX1:ALX3:ALX4:ARX:DRGX:EMX1:EMX2:EN1:EN2:ESX1:GBX1:GBX2:HESX1:ISX:LHX1:LHX2:LHX3:LHX4:LHX5:LHX6:LHX8:LHX9:LMX1A:LMX1B:MIXL1:MSX1:MSX2:NOBOX:NOTO:OTP:PDX1:PHOX2A:PHOX2B:PROP1:PRRX1:PRRX2:RAX:RAX2:SEBOX:SHOX:SHOX2:UNCX:VAX1:VAX2:VSX1:VSX2:ZFHX2	GCTAATTA	1	-1.058	1	4	7.14%	666.9	5.31%
M00589_3.00:ALX1:ALX3:ALX4:ARX:DRGX:EN1:EN2:ESX1:ISX:LHX2:LHX3:LHX4:LHX6:LHX8:LHX9:LMX1A:LMX1B:MIXL1:OTP:PHOX2A:PHOX2B:PROP1:PRRX1:PRRX2:RAX:RAX2:SEBOX:SHOX:SHOX2:UNCX:VSX1:VSX2:ZFHX2	NNTRATTRN	1	-1.051	1	22	39.29%	4514.9	35.98%
M06669_3.00:HOXA10:HOXA5:HOXA6:HOXA7:HOXA9:HOXB4:HOXB5:HOXB6:HOXB7:HOXB8:HOXB9:HOXC10:HOXC5:HOXC6:HOXC8:HOXC9:HOXD10:HOXD8:HOXD9	TTTAATTA	1	-1.049	1	4	7.14%	669.6	5.34%
M05480_3.00:BARX1:BARX2:BSX:EMX1:EMX2:EN1:EN2:EVX1:EVX2:GBX1:GBX2:GSX1:GSX2:HMX1:HMX2:HMX3:HOXA1:HOXA2:HOXA3:HOXA4:HOXA5:HOXA6:HOXA7:HOXB1:HOXB2:HOXB3:HOXB4:HOXB5:HOXB6:HOXB7:HOXB8:HOXC4:HOXC5:HOXC6:HOXD1:HOXD3:HOXD4:HOXD8:ISX:MEOX1:MEOX2:MNX1:NKX1-1:NKX1-2:NOTO:OTP:PDX1:TLX2:VAX1:VAX2:VENTX	YTAATKAB	1	-1.046	1	8	14.29%	1497.7	11.93%
M00687_3.00:SP1	RGGGGCGKRN	1	-1.044	1	8	14.29%	1498	11.94%
M04287_3.00:MLX	KRTCACRTGKR	1	-1.043	1	6	10.71%	1081.4	8.62%
M02296_3.00:HOXA10:HOXA6:HOXA7:HOXA9:HOXB6:HOXB7:HOXB8:HOXB9:HOXC10:HOXC6:HOXC8:HOXC9:HOXD10:HOXD8:HOXD9	NATAATWATR	1	-1.037	1	4	7.14%	673.3	5.37%
M03824_3.00:PTF1A	GWCAGCTGHC	1	-1.036	1	6	10.71%	1084.9	8.65%
M04717_3.00:KLF15	GGGGGGCGTGGC	1	-1.034	1	4	7.14%	675	5.38%
M06665_3.00:SIX1:SIX2:SIX4:SIX5	TATCAHNN	1	-1.033	1	10	17.86%	1927	15.36%
M09441_3.00:ZNF384	AAAAAAAAG	1	-1.026	1	4	7.14%	677.9	5.40%
M11328_3.00:RREB1	GGTYKGGGTGC	1	-1.023	1	4	7.14%	678.2	5.40%
M05172_3.00:BARX1:BARX2:BSX:EMX1:EMX2:EN1:EN2:EVX1:EVX2:GBX1:GBX2:GSX1:GSX2:HMX1:HMX2:HMX3:HOXA1:HOXA2:HOXA3:HOXA4:HOXA5:HOXA6:HOXA7:HOXA9:HOXB1:HOXB2:HOXB3:HOXB4:HOXB5:HOXB6:HOXB7:HOXB8:HOXB9:HOXC4:HOXC5:HOXC6:HOXC8:HOXC9:HOXD1:HOXD3:HOXD4:HOXD8:HOXD9:ISX:MEOX1:MEOX2:MNX1:NKX1-1:NKX1-2:NOTO:OTP:PDX1:VAX1:VAX2:VENTX	STAATTAC	1	-1.022	1	6	10.71%	1090.4	8.69%
M12295_3.00:ESR1:ESR2:HNF4A:HNF4G:NR1D1:NR1D2:NR1H2:NR1H3:NR1H4:NR2C1:NR2C2:NR2F1:NR2F2:NR2F6:NR4A1:NR4A2:NR4A3:NR5A2:NR6A1:PPARA:PPARD:PPARG:RARA:RARB:RARG:RORA:RORB:RORC:RXRA:RXRB:RXRG:THRA:THRB	AAGGTCA	1	-1.021	1	16	28.57%	3226.3	25.71%
M10373_3.00:BORCS8-MEF2B:MEF2A:MEF2B:MEF2C:MEF2D	DKCTATTTTTAG	1	-1.02	1	4	7.14%	679.2	5.41%
M02115_3.00:ALX1:ALX3:ALX4:ARX:DRGX:EN1:EN2:ESX1:GBX1:GBX2:HESX1:ISX:LHX3:LHX4:LHX6:LHX8:MIXL1:MSX1:MSX2:OTP:PHOX2A:PHOX2B:PROP1:PRRX1:PRRX2:RAX:RAX2:SEBOX:SHOX:SHOX2:UNCX:VSX1:VSX2:ZFHX2	NCAATCAA	1	-1.017	1	4	7.14%	680.4	5.42%
M06513_3.00:SP1:SP3:SP5:SP6:SP8:SP9	GTGGGCGKGGC	1	-1.014	1	4	7.14%	681.2	5.43%
M00788_3.00:TBR1	AGGTGTGAAN	1	-1.011	1	4	7.14%	682.3	5.44%
M03441_3.00:CRX:DMBX1:DPRX:GSC:GSC2:OTX1:OTX2:PITX1:PITX2:PITX3:TPRX1	GHTAATCCBN	1	-1.004	1	6	10.71%	1098.3	8.75%
M06675_3.00:ALX1:ALX3:ALX4:ARX:BARX1:BARX2:BSX:DLX1:DLX2:DLX3:DLX4:DLX5:DLX6:DRGX:EMX1:EMX2:EN1:EN2:ESX1:EVX1:EVX2:GBX1:GBX2:GSX1:GSX2:HESX1:HMX1:HMX3:HOXA1:HOXA2:HOXA3:HOXA4:HOXA5:HOXA7:HOXB1:HOXB2:HOXB3:HOXB4:HOXB5:HOXB7:HOXC4:HOXC5:HOXD1:HOXD3:HOXD4:ISX:LHX3:LHX4:MEOX1:MEOX2:MNX1:MSX1:MSX2:NANOG:NANOGP8:NKX1-1:NKX1-2:NOTO:OTP:PDX1:PHOX2A:PHOX2B:PROP1:PRRX1:PRRX2:SHOX:SHOX2:UNCX:VAX1:VAX2:VENTX…	TVTTAATTA	1	-1.003	1	4	7.14%	685.1	5.46%
M11439_3.00:ZBTB14	GSGCGCGR	1	-1.001	1	8	14.29%	1520.4	12.12%
M08650_3.00:HIF1A	ACGTGC	1	-0.9975	1	6	10.71%	1101.9	8.78%
M00408_3.00:PAX3:PAX7	NNSVATTAN	1	-0.9974	1	30	53.57%	6328.4	50.43%
M00851_3.00:ZIC1:ZIC4:ZIC5	SCGGGGGGTC	1	-0.9957	1	8	14.29%	1523.6	12.14%
M10378_3.00:BORCS8-MEF2B:MEF2A:MEF2B:MEF2C:MEF2D	WKCTATTTTTAGMW	1	-0.9919	1	4	7.14%	689.2	5.49%
M03705_3.00:SOX1:SOX10:SOX11:SOX12:SOX13:SOX14:SOX15:SOX17:SOX18:SOX2:SOX21:SOX3:SOX30:SOX4:SOX5:SOX6:SOX7:SOX8:SOX9:SRY	CYATTGTTH	1	-0.9909	1	6	10.71%	1104.8	8.80%
M06744_3.00:BARHL1:BARHL2:EMX1:EMX2:EN1:EN2:ESX1:EVX1:EVX2:GBX1:GBX2:GSX1:GSX2:HESX1:HMX1:HMX2:HMX3:HOXA2:HOXA3:HOXA4:HOXA5:HOXB2:HOXB3:HOXB4:HOXB5:HOXC4:HOXC5:HOXD3:HOXD4:LBX1:MEOX1:MEOX2:MNX1:MSX1:MSX2:NKX1-1:NKX1-2:OTP:PDX1:RAX:RAX2:TLX1:TLX2:TLX3:VAX1:VAX2:VENTX	NNYTAATTRN	1	-0.9881	1	8	14.29%	1528	12.18%
M10576_3.00:TFAP4	NAHCAGCTGD	1	-0.9865	1	6	10.71%	1106.7	8.82%
M11668_3.00:FOXA1:FOXA2:FOXA3:FOXB1	HWAARCAAACA	1	-0.9836	1	4	7.14%	693	5.52%
M00593_3.00:HOXA10:HOXA11:HOXC10:HOXC11:HOXC12:HOXD10:HOXD11:HOXD12:MEOX2	DTTTAYKABN	1	-0.9824	1	8	14.29%	1530.4	12.20%
M01807_3.00:SREBF1:SREBF2	TCGCGTGA	1	-0.9821	1	6	10.71%	1108.1	8.83%
M06819_3.00:ESR1:ESR2:HNF4A:HNF4G:NR1D2:NR1H2:NR1H3:NR1H4:NR2C1:NR2C2:NR2F1:NR2F2:NR2F6:NR4A1:NR4A2:NR4A3:NR5A2:NR6A1:PPARA:PPARD:PPARG:RARA:RARB:RARG:RORA:RORB:RORC:RXRA:RXRB:RXRG:THRA:THRB	AAGGTCA	1	-0.9812	1	12	21.43%	2387.1	19.02%
M06184_3.00:LEUTX:TPRX1	NNNWNNGGATTA	1	-0.9797	1	12	21.43%	2388.1	19.03%
M06646_3.00:DBX1:DBX2:HLX	TTAATTA	1	-0.9791	1	18	32.14%	3692.8	29.43%
M12403_3.00:NFIA:NFIB:NFIC:NFIX	GCCAGANWH	1	-0.9788	1	26	46.43%	5455	43.47%
M02918_3.00:SOX1:SOX10:SOX11:SOX12:SOX13:SOX14:SOX15:SOX17:SOX18:SOX2:SOX21:SOX3:SOX30:SOX4:SOX5:SOX6:SOX7:SOX8:SOX9:SRY	BHATTGTT	1	-0.9731	1	10	17.86%	1962.2	15.64%
M02364_3.00:NAIF1	TTACGYAAN	1	-0.9727	1	4	7.14%	696.6	5.55%
M05221_3.00:BARHL1:BARHL2:BARX1:BARX2:BSX:DLX1:DLX2:DLX3:DLX4:DLX5:DLX6:EVX1:EVX2:GBX1:GBX2:HMX1:HMX2:HMX3:HOXA1:HOXA2:HOXA3:HOXB1:HOXB2:HOXB3:HOXD1:HOXD3:MEOX1:MEOX2:MNX1:MSX1:MSX2:NANOG:NANOGP8:PDX1:VENTX	TTAAKTGB	1	-0.9698	1	18	32.14%	3699.5	29.48%
M06676_3.00:ALX1:ALX3:ALX4:ARX:BARX1:BARX2:BSX:DLX1:DLX2:DLX3:DLX4:DLX5:DLX6:DRGX:EMX1:EMX2:EN1:EN2:ESX1:EVX1:EVX2:GBX1:GBX2:GSX1:GSX2:HESX1:HMX1:HMX3:HOXA1:HOXA2:HOXA3:HOXA4:HOXA5:HOXA7:HOXB1:HOXB2:HOXB3:HOXB4:HOXB5:HOXB7:HOXC4:HOXC5:HOXD1:HOXD3:HOXD4:ISX:LHX3:LHX4:MEOX1:MEOX2:MNX1:MSX1:MSX2:NANOG:NANOGP8:NKX1-1:NKX1-2:NOTO:OTP:PDX1:PHOX2A:PHOX2B:PROP1:PRRX1:PRRX2:SHOX:SHOX2:UNCX:VAX1:VAX2:VENTX…	NNYTAATKAS	1	-0.9693	1	8	14.29%	1537.2	12.25%
M10997_3.00:NEUROD1:NEUROD2:NEUROD4:NEUROD6	RSMCAGCWGSAV	1	-0.9648	1	10	17.86%	1967	15.67%
M01745_3.00:ARID5A:ARID5B	NNAATWTNNN	1	-0.9632	1	28	50.00%	5911.4	47.11%
M11057_3.00:DBP	TTATGYAA	1	-0.9605	1	6	10.71%	1118.4	8.91%
M00892_3.00:AR:NR3C1:NR3C2:PGR	NAGGAACATN	1	-0.9584	1	6	10.71%	1119.6	8.92%
M11709_3.00:GATA1:GATA2:GATA3:GATA4:GATA5:GATA6	RAGATAGGG	1	-0.9577	1	16	28.57%	3271.9	26.07%
M08018_3.00:ZNF182	AAAAACAAAAGG	1	-0.9566	1	4	7.14%	702.8	5.60%
M02312_3.00:ALX1:ALX3:ALX4:ARX:DRGX:ESX1:ISX:LHX3:LHX4:LHX6:LHX8:LMX1A:LMX1B:MIXL1:OTP:PHOX2A:PHOX2B:PROP1:PRRX1:PRRX2:RAX:RAX2:SEBOX:SHOX:SHOX2:UNCX:VSX1:VSX2:ZFHX2	VYTRATTAVN	1	-0.9499	1	10	17.86%	1976.6	15.75%
M06622_3.00:BARX1:BARX2:BSX:EMX1:EMX2:EN1:EN2:EVX1:EVX2:GBX1:GBX2:GSX1:GSX2:HESX1:HMX1:HMX2:HMX3:HOXA1:HOXA2:HOXA3:HOXA4:HOXA5:HOXA6:HOXA7:HOXB1:HOXB2:HOXB3:HOXB4:HOXB5:HOXB6:HOXB7:HOXB8:HOXC4:HOXC5:HOXC6:HOXD1:HOXD3:HOXD4:HOXD8:ISX:MEOX1:MEOX2:MNX1:NKX1-1:NKX1-2:NOTO:OTP:PDX1:TLX1:TLX3:VAX1:VAX2:VENTX	MTTAATGA	1	-0.9486	1	4	7.14%	705.3	5.62%
M00578_3.00:GSC:TPRX1	NTAATCC	1	-0.9475	1	26	46.43%	5480.1	43.67%
M00728_3.00:CRX:DMBX1:DPRX:GSC:GSC2:OTX1:OTX2:PITX1:PITX2:PITX3:TPRX1	HTAATCCB	1	-0.9469	1	16	28.57%	3279.6	26.13%
M06639_3.00:PBX1:PBX2:PBX3:PBX4	NTTTGACA	1	-0.946	1	4	7.14%	706.6	5.63%
M10371_3.00:BORCS8-MEF2B:MEF2A:MEF2B:MEF2C:MEF2D	DKCTATTTTTRGM	1	-0.946	1	4	7.14%	706.8	5.63%
M01068_3.00:BCL11A:BCL11B	TGGCCGRAG	1	-0.9415	1	6	10.71%	1127.9	8.99%
M11134_3.00:MAF:MAFA:MAFB:MAFG:MAFK:NRL	GGTCAGCAGA	1	-0.9415	1	6	10.71%	1127.4	8.98%
M02507_3.00:PAX1:PAX2:PAX3:PAX5:PAX6:PAX7:PAX8:PAX9	CGCWTSANTG	1	-0.9368	1	34	60.71%	7273.9	57.96%
M10582_3.00:ARNT:ARNT2	GCACGTAY	1	-0.9352	1	6	10.71%	1130.3	9.01%
M01749_3.00:ARID3A:ARID3B:ARID3C	TTTRATNN	1	-0.9341	1	30	53.57%	6381.3	50.85%
M10370_3.00:BORCS8-MEF2B:MEF2A:MEF2B:MEF2C:MEF2D	WKCTATTTTTRGM	1	-0.9303	1	4	7.14%	712.6	5.68%
M05053_3.00:FOXO4	NTGTTKACGY	1	-0.9277	1	4	7.14%	713.8	5.69%
M03491_3.00:ALX1:ALX3:ALX4:ARX:BARX1:BARX2:BSX:DLX1:DLX2:DLX3:DLX4:DLX5:DLX6:DRGX:EMX1:EMX2:EN1:EN2:ESX1:EVX1:EVX2:GBX1:GBX2:GSX1:GSX2:HMX1:HMX3:HOXA1:HOXA2:HOXA3:HOXA4:HOXA5:HOXA7:HOXB1:HOXB2:HOXB3:HOXB4:HOXB5:HOXB7:HOXC4:HOXC5:HOXD1:HOXD3:HOXD4:ISX:LHX3:LHX4:MEOX1:MEOX2:MIXL1:MNX1:MSX1:MSX2:NANOG:NANOGP8:NKX1-1:NKX1-2:NOTO:OTP:PDX1:PHOX2A:PHOX2B:PROP1:PRRX1:PRRX2:RAX:RAX2:SEBOX:SHOX:SHOX2:UNCX:…	NBTAATTASN	1	-0.9248	1	6	10.71%	1135.7	9.05%
M11143_3.00:CEBPD	TTKNGCAATV	1	-0.9239	1	10	17.86%	1992.1	15.87%
M06105_3.00:MKX	NNNNNNNDACAT	1	-0.9201	1	30	53.57%	6393.7	50.95%
M11466_3.00:SALL1	NCTTTTGGAYH	1	-0.92	1	4	7.14%	716.7	5.71%
M00291_3.00:GFI1:GFI1B	NNNWGATTK	1	-0.9161	1	28	50.00%	5951.5	47.43%
M03226_3.00:FOXO1:FOXO3:FOXO4:FOXO6	TTGTTTAC	1	-0.9149	1	4	7.14%	718.8	5.73%
M05933_3.00:RFX5:RFX7	CGTTGCTAY	1	-0.9149	1	4	7.14%	718.5	5.73%
M10696_3.00:NKX6-1:NKX6-2:NKX6-3	GKTAATGR	1	-0.9131	1	8	14.29%	1568.4	12.50%
M00340_3.00:ALX1:ALX3:ALX4:ARX:BARX1:BARX2:BSX:DLX1:DLX2:DLX3:DLX4:DLX5:DLX6:DRGX:EMX1:EMX2:EN1:EN2:ESX1:EVX1:EVX2:GBX1:GBX2:GSX1:GSX2:HESX1:HOXA2:HOXA3:HOXB2:HOXB3:HOXD3:ISX:LBX1:LBX2:LHX1:LHX2:LHX3:LHX4:LHX5:LHX6:LHX8:LHX9:LMX1A:LMX1B:MEOX1:MIXL1:MNX1:MSX1:MSX2:NKX1-1:NKX1-2:NOBOX:NOTO:OTP:PDX1:PHOX2A:PHOX2B:PROP1:PRRX1:PRRX2:RAX:RAX2:SEBOX:SHOX:SHOX2:UNCX:VAX1:VAX2:VSX1:VSX2:ZFHX2:ZFHX3	WATATATTTHNN	1	-0.9123	1	4	7.14%	720	5.74%
M03369_3.00:MEIS1:MEIS2:MEIS3:PKNOX1:PKNOX2:TGIF1:TGIF2	HTGACAG	1	-0.9057	1	28	50.00%	5961	47.50%
M06128_3.00:ZNF384	AAAAAAAWAGTAAR	1	-0.9047	1	4	7.14%	722	5.75%
M00203_3.00:ZNF35	NAAHAAAYAA	1	-0.8957	1	14	25.00%	2880.3	22.95%
M11703_3.00:GATA1:GATA2:GATA3:GATA4:GATA5:GATA6	DNCWGATAAGRVN	1	-0.8897	1	4	7.14%	728.2	5.80%
M01761_3.00:ASH1L:HMGA1:HMGA2:SETBP1:SRCAP	AAAAATAT	1	-0.8852	1	8	14.29%	1584.8	12.63%
M06082_3.00:ZNF775	NNNNNRGNGAGAAKYWRNN	1	-0.8823	1	4	7.14%	731.2	5.83%
M03483_3.00:MEIS1:MEIS2:MEIS3:PKNOX1:PKNOX2:TGIF1:TGIF2	WTGACAG	1	-0.8807	1	28	50.00%	5982.3	47.67%
M02747_3.00:CLOCK	CACGTGT	1	-0.8804	1	6	10.71%	1157.6	9.22%
M00891_3.00:ESR1:ESR2:NR1D1:NR1D2:NR1H2:NR1H3:NR1H4:NR2C1:NR2C2:NR2F1:NR2F2:NR2F6:NR4A1:NR4A2:NR4A3:NR5A1:NR5A2:NR6A1:PPARA:PPARD:PPARG:RARA:RARB:RARG:RORA:RORB:RORC:RXRA:RXRB:RXRG:THRA:THRB	KRGGTCAMV	1	-0.8798	1	16	28.57%	3330.2	26.54%
M02494_3.00:ESR1:ESR2:HNF4A:NR1D1:NR1D2:NR1H2:NR1H3:NR1H4:NR2C1:NR2C2:NR2F1:NR2F2:NR2F6:NR4A1:NR4A2:NR4A3:NR5A2:NR6A1:PPARA:PPARD:PPARG:RARA:RARB:RARG:RORA:RORB:RORC:RXRA:RXRB:RXRG	RGGTCANN	1	-0.8798	1	16	28.57%	3330.2	26.54%
M02504_3.00:ESR1:ESR2:HNF4G:NR1D1:NR1D2:NR1H2:NR1H3:NR1H4:NR2C1:NR2C2:NR2F1:NR2F2:NR2F6:NR6A1:PPARA:PPARD:PPARG:RARA:RARB:RARG:RORA:RORB:RORC:RXRA:RXRB:RXRG	NAGGTCAH	1	-0.8798	1	16	28.57%	3330.2	26.54%
M02505_3.00:ESR1:ESR2:ESRRA:ESRRB:ESRRG:NR1H2:NR1H3:NR1H4:NR2C1:NR2C2:NR2F1:NR2F2:NR2F6:NR4A1:RARA:RARB:RARG:RORA:RORB:RORC:RXRA:RXRB:RXRG	NAGGTCAH	1	-0.8798	1	16	28.57%	3330.2	26.54%
M08397_3.00:E2F1:E2F2:E2F3:E2F4:E2F5:E2F6	NGGGCGGGAAV	1	-0.8774	1	4	7.14%	733.3	5.84%
M10878_3.00:TFAP2A:TFAP2B:TFAP2C:TFAP2D:TFAP2E	GCCBBVGGS	1	-0.875	1	22	39.29%	4656.1	37.10%
M06627_3.00:ALX1:ALX3:ALX4:ARX:BARHL1:BARHL2:BARX1:BARX2:BSX:DLX1:DLX2:DLX3:DLX4:DLX5:DLX6:DRGX:EMX1:EMX2:EN1:EN2:ESX1:EVX1:EVX2:GBX1:GBX2:GSX1:GSX2:HMX1:HMX2:HMX3:HOXA1:HOXA2:HOXA3:HOXA4:HOXA5:HOXB1:HOXB2:HOXB3:HOXB4:HOXB5:HOXC4:HOXC5:HOXD1:HOXD3:HOXD4:ISX:MEOX1:MEOX2:MIXL1:MNX1:MSX1:MSX2:NANOG:NANOGP8:NKX1-1:NKX1-2:PDX1:PHOX2A:PHOX2B:PROP1:PRRX1:PRRX2:RAX:RAX2:SEBOX:SHOX:SHOX2:UNCX:VAX1:VAX2:VE…	YTTAATKRG	1	-0.8676	1	4	7.14%	737.7	5.88%
M02503_3.00:HNF4A:HNF4G:NR2E1	VDGTCANNN	1	-0.8676	1	46	82.14%	10038	79.99%
M02180_3.00:BARHL1:BARHL2:BARX1:BARX2:BSX:DLX1:DLX2:DLX3:DLX4:DLX5:DLX6:EVX1:EVX2:GBX1:GBX2:HMX2:HOXA1:HOXA2:HOXA3:HOXB1:HOXB2:HOXB3:HOXD1:HOXD3:MEOX1:MEOX2:MNX1:MSX1:MSX2:NANOG:NANOGP8:PDX1:VENTX	YTAATNGNY	1	-0.8669	1	18	32.14%	3780.8	30.13%
M08902_3.00:POU5F1	TTTGCAT	1	-0.8666	1	6	10.71%	1164.1	9.28%
M00906_3.00:TBX15:TBX18:TBX20:TBX4:TBX5	RAGGTGTGAA	1	-0.8628	1	4	7.14%	739.5	5.89%
M06003_3.00:TBX2:TBX3:TBX4:TBX5	VAGGTGTSRB	1	-0.8622	1	20	35.71%	4225.8	33.67%
M00264_3.00:SOX1:SOX10:SOX11:SOX12:SOX13:SOX14:SOX15:SOX17:SOX18:SOX2:SOX21:SOX3:SOX30:SOX4:SOX5:SOX6:SOX7:SOX8:SOX9:SRY	ATTGTHNN	1	-0.861	1	26	46.43%	5556	44.27%
M08201_3.00:ZNF2	GGGGGCGCT	1	-0.8604	1	4	7.14%	740.3	5.90%
M11836_3.00:ALX1:ALX3:ALX4:ARX:DRGX:EN1:EN2:ESX1:ISX:LHX2:LHX3:LHX4:LHX6:LHX8:LHX9:LMX1A:LMX1B:MIXL1:OTP:PHOX2A:PHOX2B:PROP1:PRRX1:PRRX2:RAX:RAX2:SEBOX:SHOX:SHOX2:UNCX:VSX1:VSX2:ZFHX2	CAATCA	1	-0.8556	1	4	7.14%	742.8	5.92%
M08723_3.00:ZEB1:ZEB2	CAGGTG	1	-0.8556	1	14	25.00%	2910.2	23.19%
M05582_3.00:ALX1:ALX3:ALX4:ARX:BARHL1:BARHL2:BARX1:BARX2:BSX:DLX1:DLX2:DLX3:DLX4:DLX5:DLX6:DRGX:EMX1:EMX2:EN1:EN2:ESX1:EVX1:EVX2:GBX1:GBX2:GSX1:GSX2:HMX1:HMX2:HMX3:HOXA1:HOXA2:HOXA3:HOXA4:HOXA5:HOXB1:HOXB2:HOXB3:HOXB4:HOXB5:HOXC4:HOXC5:HOXD1:HOXD3:HOXD4:ISX:MEOX1:MEOX2:MIXL1:MNX1:MSX1:MSX2:NANOG:NANOGP8:NKX1-1:NKX1-2:PDX1:PHOX2A:PHOX2B:PROP1:PRRX1:PRRX2:RAX:RAX2:SEBOX:SHOX:SHOX2:UNCX:VAX1:VAX2:VE…	STAATTGS	1	-0.8547	1	8	14.29%	1602.9	12.77%
M00616_3.00:ALX1:ALX3:ALX4:ARX:BARHL1:BARHL2:DRGX:ESX1:EVX1:EVX2:GBX1:GBX2:HESX1:LBX1:LBX2:MEOX1:MEOX2:MIXL1:MSX1:MSX2:PHOX2A:PHOX2B:PROP1:PRRX1:PRRX2:RAX:RAX2:SHOX:SHOX2:TLX1:TLX3:UNCX:VSX1:VSX2	HTAATTAGS	1	-0.8532	1	4	7.14%	743	5.92%
M06663_3.00:BARX1:BARX2:BSX:EMX1:EMX2:EN1:EN2:EVX1:EVX2:GBX1:GBX2:GSX1:GSX2:HMX1:HMX2:HMX3:HOXA1:HOXA2:HOXA3:HOXA4:HOXA5:HOXA6:HOXA7:HOXA9:HOXB1:HOXB2:HOXB3:HOXB4:HOXB5:HOXB6:HOXB7:HOXB8:HOXB9:HOXC4:HOXC5:HOXC6:HOXC8:HOXC9:HOXD1:HOXD3:HOXD4:HOXD8:HOXD9:ISX:MEOX1:MEOX2:MNX1:NKX1-1:NKX1-2:NOTO:OTP:PDX1:VAX1:VAX2:VENTX	TTAATKA	1	-0.8514	1	8	14.29%	1604.3	12.78%
M02042_3.00:E2F1:E2F2:E2F3:E2F4:E2F5:E2F6	WDSGCGCSHW	1	-0.8509	1	4	7.14%	744.2	5.93%
M00351_3.00:HOXA13:HOXC13:HOXD13	TTTTATAC	1	-0.8438	1	4	7.14%	747.9	5.96%
M12298_3.00:ESR1:ESR2:NR1D1:NR1D2:NR1H2:NR1H3:NR1H4:NR2C1:NR2C2:NR2F1:NR2F2:NR2F6:NR4A1:NR6A1:PPARA:PPARD:PPARG:RARA:RARB:RARG:RORA:RORB:RORC:RXRA:RXRB:RXRG:THRA	TTCCKGG	1	-0.842	1	16	28.57%	3360.2	26.78%
M00349_3.00:HOXA13:HOXB13:HOXC13:HOXD13	TTTTACGA	1	-0.8414	1	4	7.14%	748.7	5.97%
M05586_3.00:BARX1:BARX2:BSX:EMX1:EMX2:EN1:EN2:EVX1:EVX2:GBX1:GBX2:GSX1:GSX2:HMX1:HMX2:HMX3:HOXA1:HOXA2:HOXA3:HOXA4:HOXA5:HOXA6:HOXA7:HOXB1:HOXB2:HOXB3:HOXB4:HOXB5:HOXB6:HOXB7:HOXB8:HOXC4:HOXC5:HOXC6:HOXD1:HOXD3:HOXD4:HOXD8:ISX:MEOX1:MEOX2:MNX1:NKX1-1:NKX1-2:NOTO:OTP:PDX1:TLX2:VAX1:VAX2:VENTX	HTAAYGAY	1	-0.8414	1	4	7.14%	748.6	5.97%
M08663_3.00:BHLHE22:BHLHE23	CAGCTG	1	-0.8398	1	6	10.71%	1178.5	9.39%
M11834_3.00:NKX6-1:NKX6-2:NKX6-3	NNTAWTTAHTWY	1	-0.8391	1	4	7.14%	749.7	5.97%
M11004_3.00:MITF:TFE3:TFEB:TFEC	CATGTGA	1	-0.8366	1	20	35.71%	4247.4	33.85%
M10313_3.00:NKX2-1:NKX2-2:NKX2-3:NKX2-4:NKX2-5:NKX2-6:NKX2-8	ASCCACTYMAS	1	-0.8359	1	10	17.86%	2049.5	16.33%
M05194_3.00:BARHL1:BARHL2:BARX1:BARX2:BSX:DLX2:DLX3:EMX1:EMX2:ESX1:EVX1:EVX2:GBX1:GBX2:HESX1:HMX1:HMX2:HMX3:HOXA1:HOXA2:HOXA3:HOXA4:HOXA5:HOXB1:HOXB2:HOXB3:HOXB4:HOXB5:HOXC4:HOXC5:HOXD1:HOXD12:HOXD3:HOXD4:LBX1:LBX2:MEOX1:MEOX2:MNX1:MSX1:MSX2:NANOG:NANOGP8:NKX1-1:NKX1-2:PDX1:RAX:RAX2:TLX1:TLX3:VENTX	NTAATGAY	1	-0.8359	1	16	28.57%	3365.1	26.82%
M05589_3.00:BARX1:BARX2:BSX:EMX1:EMX2:EN1:EN2:EVX1:EVX2:GBX1:GBX2:GSX1:GSX2:HMX1:HMX2:HMX3:HOXA1:HOXA2:HOXA3:HOXA4:HOXA5:HOXA6:HOXA7:HOXB1:HOXB2:HOXB3:HOXB4:HOXB5:HOXB6:HOXB7:HOXB8:HOXC4:HOXC5:HOXC6:HOXD1:HOXD3:HOXD4:HOXD8:ISX:MEOX1:MEOX2:MNX1:NKX1-1:NKX1-2:NOTO:OTP:PDX1:TLX2:VAX1:VAX2:VENTX	NTAATGAB	1	-0.8349	1	8	14.29%	1614.8	12.87%
M10315_3.00:ALX1:ALX3:ALX4:ARX:BARHL1:BARHL2:BARX1:BARX2:BSX:DLX1:DLX2:DLX3:DLX4:DLX5:DLX6:DRGX:EMX1:EMX2:EN1:EN2:ESX1:EVX1:EVX2:GBX1:GBX2:GSX1:GSX2:HMX1:HMX2:HMX3:HOXA1:HOXA2:HOXA3:HOXA4:HOXA5:HOXA6:HOXA7:HOXB1:HOXB2:HOXB3:HOXB4:HOXB5:HOXB6:HOXB7:HOXB8:HOXC4:HOXC5:HOXC6:HOXD1:HOXD3:HOXD4:HOXD8:ISX:LHX3:LHX4:MEOX1:MEOX2:MIXL1:MNX1:MSX1:MSX2:NANOG:NANOGP8:NKX1-1:NKX1-2:NOBOX:NOTO:OTP:PDX1:PHOX2A:P…	VYTAATGAB	1	-0.8344	1	4	7.14%	751.8	5.99%
M00184_3.00:GLIS2	NHGGGGGGTCN	1	-0.8285	1	6	10.71%	1184.5	9.44%
M08562_3.00:ZNF512B	ARRGAARGAAGGARR	1	-0.8251	1	4	7.14%	755.6	6.02%
M06201_3.00:SOX1:SOX10:SOX11:SOX12:SOX13:SOX14:SOX15:SOX17:SOX18:SOX2:SOX21:SOX3:SOX30:SOX4:SOX5:SOX6:SOX7:SOX8:SOX9:SRY	CCATTGTBH	1	-0.8245	1	14	25.00%	2934.7	23.39%
M06640_3.00:PBX1:PBX2:PBX3:PBX4	TAAAWCRAAA	1	-0.8219	1	14	25.00%	2936.1	23.40%
M11615_3.00:ELF1:ELF2:ELF4:ELK1:ELK3:ELK4:ERF:ERG:ETS1:ETS2:ETV1:ETV2:ETV3:ETV3L:ETV4:ETV5:FEV:FLI1:GABPA	GGAAGY	1	-0.8181	1	42	75.00%	9172.4	73.09%
M10989_3.00:ARNT:ARNT2	CACGTA	1	-0.8174	1	12	21.43%	2500.6	19.93%
M00564_3.00:HOXA10:HOXA11:HOXA6:HOXA9:HOXB6:HOXB8:HOXB9:HOXC10:HOXC11:HOXC12:HOXC6:HOXC8:HOXC9:HOXD10:HOXD11:HOXD12:HOXD8:HOXD9	TTWATNDN	1	-0.817	1	18	32.14%	3822.1	30.46%
M12421_3.00:SOX1:SOX10:SOX11:SOX12:SOX13:SOX14:SOX15:SOX17:SOX18:SOX2:SOX21:SOX3:SOX30:SOX4:SOX5:SOX6:SOX7:SOX8:SOX9:SRY	BACAAWG	1	-0.8158	1	24	42.86%	5152.7	41.06%
M09263_3.00:ZNF729	TGCTGCAGTTK	1	-0.8157	1	2	3.57%	334.7	2.67%
M03493_3.00:ALX1:ALX3:ALX4:ARX:DRGX:EN1:EN2:ESX1:ISX:LHX2:LHX3:LHX4:LHX6:LHX8:LHX9:LMX1A:LMX1B:MIXL1:OTP:PHOX2A:PHOX2B:PROP1:PRRX1:PRRX2:RAX:RAX2:SEBOX:SHOX:SHOX2:UNCX:VSX1:VSX2:ZFHX2	CTAATTAG	1	-0.8137	1	4	7.14%	760.7	6.06%
M05470_3.00:ALX1:ALX3:ALX4:ARX:BARHL1:BARHL2:BARX1:BARX2:BSX:DLX1:DLX2:DLX3:DLX4:DLX5:DLX6:DRGX:EMX1:EMX2:EN1:EN2:ESX1:EVX1:EVX2:GBX1:GBX2:GSX1:GSX2:HESX1:HMX1:HMX2:HMX3:HOXA1:HOXA2:HOXA3:HOXA4:HOXA5:HOXB1:HOXB2:HOXB3:HOXB4:HOXB5:HOXC4:HOXC5:HOXD1:HOXD3:HOXD4:ISX:LBX1:LBX2:LHX2:LHX3:LHX4:LHX9:MEOX1:MEOX2:MIXL1:MNX1:MSX1:MSX2:NANOG:NANOGP8:NKX1-1:NKX1-2:NOBOX:NOTO:OTP:PDX1:PHOX2A:PHOX2B:PROP1:PRRX…	HTAACGAG	1	-0.8114	1	4	7.14%	761.8	6.07%
M06776_3.00:ALX1:ALX3:ALX4:ARX:BARHL1:BARHL2:BARX1:BARX2:BSX:DLX2:DLX3:DRGX:EN1:EN2:ESX1:GBX1:GBX2:HESX1:HOXA2:HOXB2:ISX:LBX2:LHX1:LHX2:LHX3:LHX4:LHX5:LHX6:LHX8:LHX9:LMX1A:LMX1B:MEOX1:MIXL1:MNX1:MSX1:MSX2:NKX1-1:NKX1-2:NOBOX:OTP:PHOX2A:PHOX2B:PROP1:PRRX1:PRRX2:RAX:RAX2:SEBOX:SHOX:SHOX2:UNCX:VSX1:VSX2	TTAATTA	1	-0.8092	1	4	7.14%	762	6.07%
M06199_3.00:HMG20A:HMG20B	TTCCCTATGC	1	-0.8089	1	2	3.57%	336.3	2.68%
M02488_3.00:NR1D1:NR1D2:NR1H2:NR1H3:NR1H4:NR2C1:NR2C2:NR2F1:NR2F2:NR2F6:NR4A1:NR4A2:NR4A3:NR5A1:NR5A2:NR6A1:PPARA:PPARD:PPARG:RARA:RARB:RARG:RORA:RORB:RORC:RXRA:RXRB:RXRG:THRA:THRB	SAGGTCAN	1	-0.808	1	16	28.57%	3388.9	27.01%
M06012_3.00:EOMES:TBR1:TBX21:TBX5	DAGGTGTGAW	1	-0.8069	1	4	7.14%	763.4	6.08%
M03106_3.00:HIC2	VGTGGGCAY	1	-0.8019	1	18	32.14%	3835.9	30.57%
M00792_3.00:MBNL2	HYGCTTNNNNN	1	-0.7964	1	44	78.57%	9641	76.83%
M05205_3.00:HOXA10:HOXA4:HOXA5:HOXA6:HOXA7:HOXA9:HOXB4:HOXB5:HOXB6:HOXB7:HOXB8:HOXB9:HOXC10:HOXC4:HOXC5:HOXC6:HOXC8:HOXC9:HOXD10:HOXD4:HOXD8:HOXD9:MNX1:PDX1	TTAATTRC	1	-0.7964	1	8	14.29%	1638.7	13.06%
M11783_3.00:CRX:DMBX1:DPRX:GSC:GSC2:OTX1:OTX2:PITX1:PITX2:PITX3:TPRX1	WGGATTAKM	1	-0.7953	1	10	17.86%	2077.1	16.55%
M12264_3.00:NR1D2:NR2C1:NR2C2:NR2F1:NR2F2:NR2F6:NR4A1:PPARA:PPARD:PPARG:RARA:RARB:RARG:RORA:RORB:RORC:RXRA:RXRB:RXRG:THRA	AGGTCAG	1	-0.7948	1	26	46.43%	5616	44.75%
M00581_3.00:BARHL1:BARHL2:EMX1:EMX2:HMX1:HMX2:HMX3:HOXA4:HOXB4:HOXC4:HOXD4:LBX2:NKX1-1:NKX1-2:TLX1:TLX2:TLX3:VAX1:VAX2:VENTX	ATTAATTA	1	-0.7935	1	4	7.14%	769.2	6.13%
M01823_3.00:MITF:TFE3:TFEB:TFEC	NRTCACGTGN	1	-0.7919	1	6	10.71%	1204.1	9.59%
M02491_3.00:NR2E3	GAGATCAA	1	-0.7919	1	6	10.71%	1204.2	9.60%
M03039_3.00:MAF:MAFA:MAFB:NRL	GTCAGCANWWW	1	-0.7913	1	4	7.14%	770.5	6.14%
M03261_3.00:FOXC2:FOXD1:FOXD2:FOXD3:FOXG1:FOXI1:FOXI2:FOXI3:FOXJ2:FOXJ3:FOXK1:FOXK2:FOXP1:FOXP3:FOXP4	TTGTTTAY	1	-0.7913	1	4	7.14%	770.4	6.14%
M00672_3.00:KLF1:KLF8	DGGGCGTGD	1	-0.7878	1	16	28.57%	3405.1	27.13%
M03349_3.00:ALX1:ALX3:ALX4:ARX:BARHL1:BARHL2:BARX1:BARX2:BSX:DLX1:DLX2:DLX3:DLX4:DLX5:DLX6:DRGX:EMX1:EMX2:EN1:EN2:ESX1:EVX1:EVX2:GBX1:GBX2:GSX1:GSX2:HOXA1:HOXA2:HOXA3:HOXA4:HOXA5:HOXB1:HOXB2:HOXB3:HOXB4:HOXB5:HOXC4:HOXC5:HOXD1:HOXD3:HOXD4:ISX:MEOX1:MEOX2:MIXL1:MNX1:MSX1:MSX2:NANOG:NANOGP8:NKX1-1:NKX1-2:OTP:PDX1:PHOX2A:PHOX2B:PROP1:PRRX1:PRRX2:RAX:RAX2:SEBOX:SHOX:SHOX2:UNCX:VAX1:VAX2:VENTX:VSX1:VS…	YTAATTGB	1	-0.787	1	8	14.29%	1644.9	13.11%
M00194_3.00:ZNF281	DKGGGGGWGG	1	-0.7869	1	12	21.43%	2523.7	20.11%
M08909_3.00:BORCS8-MEF2B:MEF2A:MEF2B:MEF2C:MEF2D	CTATTTTTAG	1	-0.7869	1	4	7.14%	772.2	6.15%
M11800_3.00:ALX1:ALX3:ALX4:ARX:BARHL1:BARHL2:BARX1:BARX2:BSX:DLX1:DLX2:DLX3:DLX4:DLX5:DLX6:DRGX:EMX1:EMX2:EN1:EN2:ESX1:EVX1:EVX2:GBX1:GBX2:GSX1:GSX2:HESX1:HMX1:HMX2:HMX3:HOXA1:HOXA2:HOXA3:HOXB1:HOXB2:HOXB3:HOXD1:HOXD3:ISX:LBX1:LBX2:LHX1:LHX2:LHX3:LHX4:LHX5:LHX9:MEOX1:MEOX2:MIXL1:MNX1:MSX1:MSX2:NANOG:NANOGP8:NKX1-1:NKX1-2:NOBOX:OTP:PDX1:PHOX2A:PHOX2B:PROP1:PRRX1:PRRX2:RAX:RAX2:SEBOX:SHOX:SHOX2:UNC…	WVTCHCCAAWWA	1	-0.7869	1	4	7.14%	772.3	6.15%
M11933_3.00:PAX2	ACTCAGGSRTG	1	-0.7869	1	4	7.14%	772.2	6.15%
M02612_3.00:LIN54	NATTTRAN	1	-0.7861	1	32	57.14%	6961.6	55.47%
M02570_3.00:SOX1:SOX10:SOX11:SOX12:SOX13:SOX14:SOX15:SOX17:SOX18:SOX2:SOX21:SOX3:SOX30:SOX4:SOX5:SOX6:SOX7:SOX8:SOX9:SRY	HNTTGTNNNN	1	-0.7792	1	36	64.29%	7861.7	62.65%
M02303_3.00:ALX1:ALX3:ALX4:ARX:DRGX:EN1:EN2:ESX1:GBX1:GBX2:ISX:LBX1:LBX2:LHX2:LHX3:LHX4:LHX9:LMX1A:LMX1B:MIXL1:MSX1:MSX2:NOBOX:OTP:PHOX2A:PHOX2B:PROP1:PRRX1:PRRX2:RAX:RAX2:SEBOX:SHOX:SHOX2:UNCX:VSX1:VSX2	NYCAATTAAN	1	-0.7738	1	4	7.14%	778.5	6.20%
M06643_3.00:HOXA3:HOXA4:HOXA5:HOXA6:HOXA7:HOXB3:HOXB4:HOXB5:HOXB6:HOXB7:HOXB8:HOXC4:HOXC5:HOXC6:HOXC8:HOXD3:HOXD4:HOXD8:PDX1	GTTAATKA	1	-0.7716	1	4	7.14%	779.3	6.21%
M12080_3.00:BORCS8-MEF2B:MEF2A:MEF2B:MEF2C:MEF2D	CTATTTW	1	-0.7716	1	8	14.29%	1654.2	13.18%
M11860_3.00:ALX1:ALX3:ALX4:ARX:BARX1:BARX2:BSX:DLX1:DLX2:DLX3:DLX4:DLX5:DLX6:DRGX:EMX1:EMX2:EN1:EN2:ESX1:EVX1:EVX2:GBX1:GBX2:GSX1:GSX2:HESX1:HOXA1:HOXA2:HOXA3:HOXB1:HOXB2:HOXB3:HOXD3:ISX:LBX1:LBX2:LHX1:LHX2:LHX3:LHX4:LHX5:LHX6:LHX8:LHX9:LMX1A:LMX1B:MEOX1:MIXL1:MNX1:MSX1:MSX2:NKX1-1:NKX1-2:NOBOX:NOTO:OTP:PDX1:PHOX2A:PHOX2B:PROP1:PRRX1:PRRX2:RAX:RAX2:SEBOX:SHOX:SHOX2:UNCX:VAX1:VAX2:VSX1:VSX2:ZFHX2:…	AATWAGHW	1	-0.7714	1	12	21.43%	2535.6	20.21%
M05193_3.00:BARHL1:BARHL2:BARX1:BARX2:BSX:DLX2:DLX3:EMX1:EMX2:ESX1:EVX1:EVX2:GBX1:GBX2:HESX1:HMX1:HMX2:HMX3:HOXA1:HOXA2:HOXA3:HOXA4:HOXA5:HOXB1:HOXB2:HOXB3:HOXB4:HOXB5:HOXC4:HOXC5:HOXD1:HOXD12:HOXD3:HOXD4:LBX1:LBX2:MEOX1:MEOX2:MNX1:MSX1:MSX2:NANOG:NANOGP8:NKX1-1:NKX1-2:PDX1:RAX:RAX2:TLX1:TLX3:VENTX	STAATTRC	1	-0.7703	1	16	28.57%	3420.4	27.26%
M00372_3.00:ALX1:ALX3:ALX4:ARX:BARX1:BARX2:BSX:DLX1:DLX2:DLX3:DLX4:DLX5:DLX6:DRGX:EMX1:EMX2:EN1:EN2:ESX1:EVX1:EVX2:GBX1:GBX2:GSX1:GSX2:HESX1:HOXA1:HOXA2:HOXA3:HOXB1:HOXB2:HOXB3:HOXD3:ISX:LBX1:LBX2:LHX1:LHX2:LHX3:LHX4:LHX5:LHX6:LHX8:LHX9:LMX1A:LMX1B:MEOX1:MIXL1:MNX1:MSX1:MSX2:NKX1-1:NKX1-2:NOBOX:NOTO:OTP:PDX1:PHOX2A:PHOX2B:PROP1:PRRX1:PRRX2:RAX:RAX2:SEBOX:SHOX:SHOX2:UNCX:VAX1:VAX2:VSX1:VSX2:ZFHX2:…	DANBNAATTA	1	-0.7701	1	8	14.29%	1655.4	13.19%
M04341_3.00:TCF12:TCF3:TCF4	VCACCTGC	1	-0.7681	1	18	32.14%	3865.6	30.80%
M08910_3.00:BORCS8-MEF2B:MEF2A:MEF2B:MEF2C:MEF2D	KCTATTTTTRG	1	-0.7673	1	4	7.14%	782	6.23%
M00793_3.00:MBD1	NHWTHGCGM	1	-0.767	1	8	14.29%	1657.1	13.20%
M04913_3.00:ELF1:ELF2:ELF4:ELK1:ELK3:ELK4:ERF:ERG:ETS1:ETS2:ETV1:ETV2:ETV3:ETV3L:ETV4:ETV5:FEV:FLI1:GABPA	VRCMGGAAGTR	1	-0.766	1	10	17.86%	2098.9	16.73%
M06772_3.00:HOXA3:HOXA4:HOXA5:HOXA6:HOXA7:HOXA9:HOXB3:HOXB4:HOXB5:HOXB6:HOXB7:HOXB8:HOXB9:HOXC4:HOXC5:HOXC6:HOXC8:HOXC9:HOXD3:HOXD4:HOXD8:HOXD9:PDX1	NTTAATKA	1	-0.761	1	8	14.29%	1661	13.24%
M05548_3.00:BARX1:BARX2:BSX:EMX1:EMX2:EN1:EN2:EVX1:EVX2:GBX1:GBX2:GSX1:GSX2:HMX1:HMX2:HMX3:HOXA1:HOXA2:HOXA3:HOXA4:HOXA5:HOXA6:HOXA7:HOXB1:HOXB2:HOXB3:HOXB4:HOXB5:HOXB6:HOXB7:HOXB8:HOXC4:HOXC5:HOXC6:HOXD1:HOXD3:HOXD4:HOXD8:ISX:MEOX1:MEOX2:MNX1:NKX1-1:NKX1-2:NOTO:OTP:PDX1:TLX2:VAX1:VAX2:VENTX	YTAATGAY	1	-0.7609	1	4	7.14%	784.9	6.25%
M01822_3.00:TCF12:TCF3:TCF4	VCAGGTGBN	1	-0.759	1	20	35.71%	4317.2	34.40%
M00176_3.00:MAX	NNCACGTGS	1	-0.7587	1	12	21.43%	2545.8	20.29%
M12781_3.00:TBP:TBPL2	TATAAAA	1	-0.7585	1	6	10.71%	1223.3	9.75%
M09602_3.00:ASH1L:HMGA1:HMGA2:SETBP1:SRCAP	AAAAATTTT	1	-0.758	1	8	14.29%	1664	13.26%
M03479_3.00:HOXA10:HOXA11:HOXA9:HOXB9:HOXC10:HOXC11:HOXC12:HOXC9:HOXD10:HOXD11:HOXD12:HOXD9	NTTTTATKRCY	1	-0.7567	1	4	7.14%	786.2	6.27%
M01146_3.00:MEIS3	TGACRTCT	1	-0.7448	1	12	21.43%	2556.3	20.37%
M12223_3.00:ESR1:ESR2:ESRRA:ESRRB:ESRRG:NR1H2:NR1H3:NR2C2:NR2F1:NR2F2:NR2F6:RARA:RARB:RARG:RORA:RORB:RORC	BRGGTCA	1	-0.7441	1	20	35.71%	4331.1	34.51%
M11448_3.00:ZNF735	KGGCAGCAGA	1	-0.7441	1	4	7.14%	792	6.31%
M05235_3.00:ALX1:ALX3:ALX4:ARX:BARHL1:BARHL2:BARX1:BARX2:BSX:DLX1:DLX2:DLX3:DLX4:DLX5:DLX6:DRGX:EMX1:EMX2:EN1:EN2:ESX1:EVX1:EVX2:GBX1:GBX2:GSX1:GSX2:HMX1:HMX2:HMX3:HOXA1:HOXA2:HOXA3:HOXA4:HOXA5:HOXB1:HOXB2:HOXB3:HOXB4:HOXB5:HOXC4:HOXC5:HOXD1:HOXD3:HOXD4:ISX:LHX2:LHX3:LHX4:LHX9:MEOX1:MIXL1:MNX1:MSX1:MSX2:NKX1-1:NKX1-2:NOBOX:NOTO:OTP:PDX1:PHOX2A:PHOX2B:PROP1:PRRX1:PRRX2:RAX:RAX2:SEBOX:SHOX:SHOX2:TL…	STAATTAV	1	-0.7431	1	6	10.71%	1232.6	9.82%
M05490_3.00:SIX1:SIX2:SIX4:SIX5	VSGTATCRYN	1	-0.7399	1	4	7.14%	794.3	6.33%
M09934_3.00:MAF:MAFA:MAFB:MAFG:MAFK:NRL	CTGASTCAGCA	1	-0.7379	1	4	7.14%	795.5	6.34%
M09970_3.00:MAF:MAFA:MAFB:MAFG:MAFK:NRL	CTGASTCAGCA	1	-0.7379	1	4	7.14%	795.5	6.34%
M10720_3.00:BORCS8-MEF2B:MEF2A:MEF2B:MEF2C:MEF2D	KCTATTTTTRGH	1	-0.7317	1	4	7.14%	798.5	6.36%
M11982_3.00:HSF1:HSF2:HSF4	VGAABNTTCK	1	-0.7317	1	4	7.14%	798.7	6.36%
M11397_3.00:ZBTB7A	AGTGGGTSBCB	1	-0.7309	1	10	17.86%	2124.2	16.93%
M03776_3.00:TBX1:TBX10	AGGTGTGA	1	-0.7276	1	4	7.14%	800.4	6.38%
M09505_3.00:ZNF250	VCTGCAAGG	1	-0.7269	1	8	14.29%	1684.3	13.42%
M00175_3.00:MYF5:MYF6:MYOG	RACAGNTGN	1	-0.7234	1	26	46.43%	5686.5	45.31%
M02863_3.00:ARX:BARHL1:BARHL2:BARX1:BARX2:BSX:DLX1:DLX2:DLX3:DLX4:DLX5:DLX6:EMX1:EMX2:ESX1:EVX1:EVX2:GBX1:GBX2:HMX1:HMX2:HMX3:HOXA2:HOXB2:LBX1:LBX2:MEOX1:MEOX2:MNX1:MSX1:MSX2:NANOG:NANOGP8:NKX1-1:NKX1-2:PDX1:RAX:RAX2:TLX1:TLX2:TLX3:UNCX:VAX1:VAX2	TAAACG	1	-0.7195	1	4	7.14%	804.3	6.41%
M04756_3.00:KLF17	DAGGGCGTGGCN	1	-0.7195	1	4	7.14%	805	6.41%
M10874_3.00:TFAP2A:TFAP2B:TFAP2C:TFAP2D:TFAP2E	GCCYSRGGS	1	-0.7131	1	16	28.57%	3471.2	27.66%
M01797_3.00:MITF:TFE3:TFEB:TFEC	NRTCACGHGV	1	-0.7099	1	6	10.71%	1252.8	9.98%
M09713_3.00:MEF2A:MEF2C	CTAWAAATAG	1	-0.7095	1	4	7.14%	809.7	6.45%
M01581_3.00:CUX1:CUX2	WRCCRATMA	1	-0.7087	1	10	17.86%	2141.8	17.07%
M00897_3.00:SOX1:SOX10:SOX11:SOX12:SOX13:SOX14:SOX15:SOX17:SOX18:SOX2:SOX21:SOX3:SOX30:SOX4:SOX5:SOX6:SOX7:SOX8:SOX9:SRY	ATTGTTNNN	1	-0.7068	1	20	35.71%	4367.6	34.80%
M00333_3.00:ALX1:ALX3:ALX4:ARX:BARX1:BARX2:BSX:DLX1:DLX2:DLX3:DLX6:DRGX:EMX1:EMX2:EN1:EN2:ESX1:EVX1:EVX2:GBX1:GBX2:GSX1:GSX2:HESX1:HOXA2:HOXA3:HOXB2:HOXB3:HOXD3:ISL1:ISL2:ISX:LBX1:LBX2:LHX1:LHX2:LHX3:LHX4:LHX5:LHX6:LHX8:LHX9:LMX1A:LMX1B:MEOX1:MIXL1:MNX1:MSX1:MSX2:NKX1-1:NKX1-2:NOBOX:NOTO:OTP:PDX1:PHOX2A:PHOX2B:PROP1:PRRX1:PRRX2:RAX:RAX2:SEBOX:SHOX:SHOX2:UNCX:VAX1:VAX2:VSX1:VSX2:ZFHX2:ZFHX3	NNNTAAT	1	-0.7068	1	46	82.14%	10161.1	80.97%
M11579_3.00:E2F1:E2F2:E2F3:E2F4:E2F5:E2F6	AVGAAACG	1	-0.7056	1	14	25.00%	3033.6	24.17%
M00413_3.00:PAX3:PAX7	VATTANN	1	-0.7055	1	46	82.14%	10162.6	80.98%
M10718_3.00:IRF4:IRF8	ACTGAAACCA	1	-0.7035	1	4	7.14%	812.4	6.47%
M03221_3.00:FOXI1:FOXI2:FOXI3:FOXJ1:FOXJ2:FOXJ3:FOXK2:FOXP3	TTGTTTAY	1	-0.6918	1	4	7.14%	818.9	6.53%
M00430_3.00:EGR1:EGR2:EGR3:EGR4	NGCGKGGGC	1	-0.6906	1	16	28.57%	3492.8	27.83%
M05204_3.00:HOXA10:HOXA4:HOXA5:HOXA6:HOXA7:HOXA9:HOXB4:HOXB5:HOXB6:HOXB7:HOXB8:HOXB9:HOXC10:HOXC4:HOXC5:HOXC6:HOXC8:HOXC9:HOXD10:HOXD4:HOXD8:HOXD9:MNX1:PDX1	WTAACGAC	1	-0.6899	1	4	7.14%	819.7	6.53%
M11260_3.00:PATZ1	DGGGGGGGGGCCA	1	-0.688	1	2	3.57%	375.1	2.99%
M03296_3.00:RHOXF1	HTRATCCC	1	-0.6877	1	20	35.71%	4386.7	34.96%
M02932_3.00:TCF12:TCF3:TCF4	CAGGTGY	1	-0.6866	1	14	25.00%	3050.4	24.31%
M00177_3.00:MAX	VCACGTGNN	1	-0.6833	1	12	21.43%	2607.5	20.78%
M11356_3.00:ZBTB7B	GGGGAGGGS	1	-0.682	1	10	17.86%	2162.8	17.23%
M09120_3.00:ZNF208	ADACAGAAGRMA	1	-0.6817	1	8	14.29%	1716.1	13.68%
M08073_3.00:ZNF543	GGGGAGGGGGCC	1	-0.6796	1	2	3.57%	378.2	3.01%
M10889_3.00:ARID3A:ARID3B:ARID3C	AATTAA	1	-0.679	1	8	14.29%	1718.7	13.70%
M02495_3.00:HNF4A:HNF4G	NNNGAYCAN	1	-0.6776	1	46	82.14%	10185.4	81.16%
M05393_3.00:BARX1:BARX2:BSX:EMX1:EMX2:EN1:EN2:EVX1:EVX2:GBX1:GBX2:GSX1:GSX2:HMX1:HMX2:HMX3:HOXA1:HOXA2:HOXA3:HOXA4:HOXA5:HOXB1:HOXB2:HOXB3:HOXB4:HOXB5:HOXC4:HOXC5:HOXD1:HOXD3:HOXD4:LBX2:MEOX1:MEOX2:MNX1:NANOG:NANOGP8:NKX1-1:NKX1-2:PDX1:TLX2:VENTX	GCTAATTRCN	1	-0.6764	1	4	7.14%	826.5	6.59%
M12005_3.00:IRF1:IRF2	AAGTGAA	1	-0.6746	1	10	17.86%	2168.7	17.28%
M02479_3.00:ESR1:ESR2:NR1D1:NR1D2:NR1H2:NR1H3:NR1H4:NR2C1:NR2C2:NR2F1:NR2F2:NR2F6:NR4A1:NR4A2:NR4A3:NR5A2:NR6A1:PPARA:PPARD:PPARG:RARA:RARB:RARG:RORA:RORB:RORC:RXRA:RXRB:RXRG	RGGTCANN	1	-0.6696	1	16	28.57%	3512.7	27.99%
M06389_3.00:FERD3L	GTRACAGCTG	1	-0.667	1	4	7.14%	831.6	6.63%
M00436_3.00:HOXA10:HOXA4:HOXA5:HOXA6:HOXA7:HOXA9:HOXB4:HOXB5:HOXB6:HOXB7:HOXB8:HOXB9:HOXC10:HOXC4:HOXC5:HOXC6:HOXC8:HOXC9:HOXD10:HOXD4:HOXD8:HOXD9:MNX1:PDX1	NYVATTA	1	-0.6652	1	24	42.86%	5302	42.25%
M12425_3.00:SOX1:SOX10:SOX11:SOX12:SOX13:SOX14:SOX15:SOX17:SOX18:SOX2:SOX21:SOX3:SOX30:SOX4:SOX5:SOX6:SOX7:SOX8:SOX9:SRY	ACAAAGV	1	-0.6644	1	16	28.57%	3517.6	28.03%
[truncated: 6,441 more rows]

## Sheet: HOMER_HE_enAllele
Motif Name	Consensus	P-value	Log P-value	q-value (Benjamini)	# of Target Sequences with Motif(of 306)	% of Target Sequences with Motif	# of Background Sequences with Motif(of 25168)	% of Background Sequences with Motif
M05768_3.00:ESR1:ESR2:NR1D1:NR1D2:NR1H2:NR1H3:NR1H4:NR2C1:NR2C2:NR2F1:NR2F2:NR2F6:NR4A1:NR5A2:NR6A1:PPARA:PPARD:PPARG:RARA:RARB:RARG:RORA:RORB:RORC:RXRA:RXRB:RXRG	RAGGTCAAAAGGTCAH	1e-20	-47.9	0	32	10.39%	269.3	1.02%
M05771_3.00:ESR1:ESR2:NR1D1:NR1D2:NR1H2:NR1H3:NR1H4:NR2C1:NR2C2:NR2F1:NR2F2:NR2F6:NR4A1:NR5A2:NR6A1:PPARA:PPARD:PPARG:RARA:RARB:RARG:RORA:RORB:RORC:RXRA:RXRB:RXRG	RAGGTCAAAAGGTCAH	1e-20	-47.09	0	32	10.39%	277	1.05%
M08287_3.00:JUN:JUNB:JUND	RRGVATGAGTCAYMN	1e-18	-42.91	0	26	8.44%	184.1	0.70%
M09942_3.00:FOS:FOSB:FOSL1:FOSL2	GGRTGAGTCAYC	1e-18	-42.23	0	32	10.39%	331.5	1.25%
M08296_3.00:JUN:JUNB:JUND	GRTGAGTCAYC	1e-18	-41.66	0	32	10.39%	339	1.28%
M09904_3.00:FOSL2	KRATGAGTCATY	1e-17	-40.11	0	32	10.39%	358.9	1.36%
M09929_3.00:JUN:JUNB:JUND	DRTGACTCATC	1e-17	-39.59	0	32	10.39%	366	1.38%
M09928_3.00:FOS:FOSB:FOSL1:FOSL2	GRRTGAGTCAYC	1e-17	-39.15	0	32	10.39%	371.6	1.40%
M09944_3.00:FOS:FOSB:FOSL1:FOSL2	GRRTGAGTCAYC	1e-17	-39.15	0	32	10.39%	371.6	1.40%
M11387_3.00:SP1:SP3:SP4:SP5:SP6:SP8:SP9	AGCCTTGGGGAGGG	1e-16	-38.12	0	26	8.44%	228	0.86%
M08691_3.00:FOSL2	GRTGACTCAB	1e-16	-37.95	0	32	10.39%	388.4	1.47%
M04241_3.00:JUN:JUNB:JUND	RTGMGTCAT	1e-16	-37.22	0	46	14.94%	884.4	3.34%
M01887_3.00:FOS:FOSB:FOSL1:FOSL2	DTGMGTCATNN	1e-15	-36.43	0	92	29.87%	3204.5	12.10%
M09969_3.00:JUN:JUNB:JUND	GGRTGAGTCAY	1e-15	-36.15	0	32	10.39%	416	1.57%
M08205_3.00:JUN:JUNB:JUND	GRVTGAGTCAYC	1e-15	-35.33	0	32	10.39%	428.4	1.62%
M10612_3.00:ATF3:JDP2	DATGASTCATHN	1e-15	-34.97	0	32	10.39%	434.6	1.64%
M08137_3.00:ZNF398	AGGGAGGGARRGAG	1e-15	-34.66	0	32	10.39%	439.9	1.66%
M08705_3.00:FOS:FOSB:FOSL1:FOSL2	ATGAGTCAT	1e-14	-34.3	0	32	10.39%	446	1.68%
M12303_3.00:ESR1:ESR2:HNF4A:HNF4G:NR1D1:NR1D2:NR1H2:NR1H3:NR1H4:NR2C1:NR2C2:NR2F1:NR2F2:NR2F6:NR4A1:NR4A2:NR4A3:NR5A2:NR6A1:PPARA:PPARD:PPARG:RARA:RARB:RARG:RORA:RORB:RORC:RXRA:RXRB:RXRG:THRA:THRB	WGGGGTCAARGGYTCA	1e-14	-33.36	0	24	7.79%	231.7	0.88%
M08291_3.00:FOS:FOSB:FOSL1:FOSL2	ATGASTCACCC	1e-14	-33.27	0	26	8.44%	284.5	1.07%
M09951_3.00:FOS:FOSB:FOSL1:FOSL2	GRTGAGTCAYC	1e-14	-32.81	0	32	10.39%	471.7	1.78%
M06193_3.00:ESR1:ESR2:NR1D1:NR1D2:NR1H2:NR1H3:NR1H4:NR2C1:NR2C2:NR2F1:NR2F2:NR2F6:NR4A1:NR4A2:NR4A3:NR5A1:NR5A2:NR6A1:PPARA:PPARD:PPARG:RARA:RARB:RARG:RORA:RORB:RORC:RXRA:RXRB:RXRG:THRA:THRB	WAAGTAGGTCA	1e-14	-32.81	0	22	7.14%	189.2	0.71%
M08353_3.00:CTCF	GCCACYAGGGGGCGCYVB	1e-14	-32.72	0	12	3.90%	25.1	0.09%
M08365_3.00:CTCF	GGCCACYAGRKGGCRCYV	1e-14	-32.72	0	12	3.90%	25.1	0.09%
M08378_3.00:CTCF	TGGCCACYAGRGGGCRSY	1e-14	-32.72	0	12	3.90%	25.1	0.09%
M08761_3.00:ZSCAN21	AGTGCTT	1e-14	-32.35	0	136	44.16%	6334.3	23.93%
M08293_3.00:JUN:JUNB:JUND	DATGAGTCATC	1e-13	-31.78	0	26	8.44%	304.7	1.15%
M09920_3.00:JUN:JUNB:JUND	GRTGAGTCAYY	1e-13	-31.73	0	32	10.39%	491.3	1.86%
M04534_3.00:JUN:JUNB:JUND	SATGASTCATV	1e-13	-31.59	0	20	6.49%	156.2	0.59%
M10008_3.00:CTCFL	GCCRSCAGGGGGCGCYV	1e-13	-31.31	0	12	3.90%	29.4	0.11%
M04237_3.00:ATF3:JDP2	RTGAGTCAT	1e-13	-31	0	32	10.39%	505.9	1.91%
M08367_3.00:CTCF	ASYGCCATCTAGTGG	1e-13	-30.06	0	12	3.90%	33.9	0.13%
M04419_3.00:TCF12:TCF3:TCF4	GCAGGTGB	1e-12	-29.82	0	144	46.75%	7122.4	26.90%
M11276_3.00:CTCF	NNNYNGCCACYAGRKGGCRC	1e-12	-29.76	0	12	3.90%	34.5	0.13%
M08270_3.00:FOSL2	VAGGATGASTCAYH	1e-12	-29.72	0	20	6.49%	174.8	0.66%
M04545_3.00:JUN:JUNB:JUND	KATGAGTCATM	1e-12	-29.23	0	20	6.49%	179.1	0.68%
M08342_3.00:CTCF	GCCACCAGGGGGCGC	1e-12	-28.67	0	12	3.90%	38.5	0.15%
M08343_3.00:CTCF	GCCACCAGGGGGCGC	1e-12	-28.67	0	12	3.90%	38.5	0.15%
M08352_3.00:CTCF	CCACCAGGGGGCGCYVS	1e-12	-28.67	0	12	3.90%	38.5	0.15%
M08364_3.00:CTCF	CCACYAGRKGGCRSYRKH	1e-12	-28.67	0	12	3.90%	38.9	0.15%
M06228_3.00:JUN:JUNB:JUND	KATGAGTCATC	1e-12	-28.4	0	20	6.49%	188.2	0.71%
M10055_3.00:ZNF467	GGGGAGGGGRRGGGGGGGGGGG	1e-12	-28.31	0	20	6.49%	189.2	0.71%
M06041_3.00:FOSL2	NNNRWKGCGTCATCNNNNNN	1e-12	-28.19	0	22	7.14%	242.1	0.91%
M11061_3.00:BACH1:BACH2	CRTGAGTCATC	1e-12	-27.75	0	24	7.79%	305.3	1.15%
M02892_3.00:ESR1:ESR2:NR1D1:NR1D2:NR1H2:NR1H3:NR1H4:NR2C1:NR2C2:NR2F1:NR2F2:NR2F6:NR4A1:NR4A2:NR4A3:NR5A1:NR5A2:NR6A1:PPARA:PPARD:PPARG:RARA:RARB:RARG:RORA:RORB:RORC:RXRA:RXRB:RXRG:THRA:THRB	WAABTAGGTCA	1e-11	-27.51	0	16	5.19%	108.5	0.41%
M05824_3.00:NR1I2:NR1I3:VDR	AAAGTTCGY	1e-11	-27.44	0	56	18.18%	1659.8	6.27%
M08278_3.00:JUN:JUNB:JUND	RRGNATGAGTCATCM	1e-11	-27.43	0	18	5.84%	151.1	0.57%
M04228_3.00:NFE2:NFE2L1:NFE2L2:NFE2L3	ATGACTCAT	1e-11	-27.33	0	18	5.84%	152.3	0.58%
M08981_3.00:ATF3:JDP2	GATGASTCAY	1e-11	-27.33	0	18	5.84%	152.3	0.58%
M11113_3.00:FOS:FOSB:FOSL1:FOSL2	RTGASTCAY	1e-11	-27.33	0	18	5.84%	152.3	0.58%
M11282_3.00:CTCF	CCRCNAGGKGGCRSTV	1e-11	-27.22	0	22	7.14%	255.6	0.97%
M04470_3.00:NFE2:NFE2L1:NFE2L2:NFE2L3	VATGASTCATB	1e-11	-27.03	0	18	5.84%	155.8	0.59%
M08332_3.00:CTCF	CCACCAGGGGGCGCY	1e-11	-26.75	0	12	3.90%	47	0.18%
M08335_3.00:CTCF	CCACCAGGGGGCGCY	1e-11	-26.75	0	12	3.90%	47	0.18%
M08374_3.00:CTCF	GCCACYAGRKGGCRSYR	1e-11	-26.75	0	12	3.90%	47	0.18%
M03415_3.00:ALX1:ALX3:ALX4:ARX:BARHL1:BARHL2:BARX1:BARX2:BSX:DLX1:DLX2:DLX3:DLX6:DRGX:EMX1:EMX2:EN1:EN2:ESX1:EVX1:EVX2:GBX1:GBX2:GSX1:GSX2:HESX1:HMX1:HMX2:HMX3:HOXA1:HOXA2:HOXA3:HOXA4:HOXA5:HOXB1:HOXB2:HOXB3:HOXB4:HOXB5:HOXC4:HOXC5:HOXD3:HOXD4:LHX2:LHX3:LHX4:LHX9:MEOX1:MEOX2:MIXL1:MNX1:MSX1:MSX2:NKX1-1:NKX1-2:NOTO:OTP:PDX1:PHOX2A:PHOX2B:PROP1:PRRX1:PRRX2:RAX:RAX2:SEBOX:SHOX:SHOX2:TLX1:TLX2:TLX3:U…	TAATTARYTAATTA	1e-11	-26.65	0	16	5.19%	115.8	0.44%
M06223_3.00:JUN:JUNB:JUND	DATGAGTCAT	1e-11	-26.54	0	26	8.44%	388.5	1.47%
M01889_3.00:ATF3:JDP2	ACGTCATC	1e-11	-26.53	0	32	10.39%	602.2	2.27%
M06067_3.00:ZNF746	RGGGNVNRDAGKAGGGAGGG	1e-11	-26.16	0	18	5.84%	164.7	0.62%
M12651_3.00:BNC1:BNC2	TGAGTCA	1e-11	-25.6	0	32	10.39%	625.5	2.36%
M08286_3.00:FOS:FOSB:FOSL1:FOSL2	RRGGATGAGTCAYMV	1e-11	-25.52	0	18	5.84%	171.3	0.65%
M04755_3.00:KLF17	AAKGGGTGCGTGGTG	1e-11	-25.5	0	16	5.19%	125.3	0.47%
M11094_3.00:BATF:BATF3	GWDATGAGTC	1e-11	-25.36	0	48	15.58%	1344.5	5.08%
M04586_3.00:AC023509.3:ATF2:ATF7	NATGACGTCATN	1e-10	-25.26	0	18	5.84%	174.6	0.66%
M05855_3.00:ESR1:ESR2:NR1D1:NR1D2:NR1H2:NR1H3:NR1H4:NR2C1:NR2C2:NR2F1:NR2F2:NR2F6:NR4A1:NR4A2:NR4A3:NR5A2:NR6A1:PPARA:PPARD:PPARG:RARA:RARB:RARG:RORA:RORB:RORC:RXRA:RXRB:RXRG	RAGGTCAAAAGGTCAN	1e-10	-25.13	0	32	10.39%	637.3	2.41%
M04102_3.00:PAX6	TAATCRATTA	1e-10	-25.02	0	26	8.44%	417.8	1.58%
M08284_3.00:FOS:FOSB:FOSL1:FOSL2	GATGASTCACWSN	1e-10	-24.99	0	20	6.49%	230	0.87%
M08321_3.00:CTCF	CCACCAGGGGGCGCYR	1e-10	-24.94	0	12	3.90%	55.9	0.21%
M08354_3.00:CTCF	CCACCAGGGGGCGCY	1e-10	-24.94	0	12	3.90%	55.9	0.21%
M05004_3.00:ELF1:ELF2:ELF4:ELK1:ELK3:ELK4:ERF:ERG:ETS1:ETS2:ETV1:ETV2:ETV3:ETV3L:ETV4:ETV5:FEV:FLI1:GABPA	NRCCGGAWGYR	1e-10	-24.91	0	38	12.34%	894.1	3.38%
M09143_3.00:ZNF668	YAGGACCCWGMGGACRCC	1e-10	-24.9	0	6	1.95%	1.5	0.01%
M11082_3.00:NFE2:NFE2L1:NFE2L2:NFE2L3	RTGACTCAGCA	1e-10	-24.77	0	20	6.49%	233.9	0.88%
M08358_3.00:CTCF	CCACCAGGGGGCGCYVB	1e-10	-24.76	0	12	3.90%	56.3	0.21%
M11222_3.00:ZNF263	GRGGGAGGAGGR	1e-10	-24.7	0	42	13.64%	1082.3	4.09%
M04345_3.00:FERD3L	GCRCCATATGTTAC	1e-10	-24.69	0	8	2.60%	11.8	0.04%
M11482_3.00:ZIC1:ZIC2:ZIC3:ZIC4:ZIC5	CCCAGCGGG	1e-10	-24.65	0	44	14.29%	1178.3	4.45%
M08285_3.00:FOS:FOSB:FOSL1:FOSL2	ATGACTCACYC	1e-10	-24.63	0	26	8.44%	425.7	1.61%
M06414_3.00:JUN:JUNB:JUND	RATGASTCAYC	1e-10	-24.58	0	26	8.44%	426.7	1.61%
M04471_3.00:NFE2:NFE2L1:NFE2L2:NFE2L3	VATGASTCATB	1e-10	-24.56	0	20	6.49%	236.8	0.89%
M09322_3.00:ZNF813	RRKGAAGGARRGGGNNV	1e-10	-24.48	0	24	7.79%	360.4	1.36%
M10405_3.00:ESR1:ESR2:NR1D1:NR1D2:NR1H2:NR1H3:NR1H4:NR2C1:NR2C2:NR2F1:NR2F2:NR2F6:NR4A1:NR4A2:NR4A3:NR5A1:NR5A2:NR6A1:PPARA:PPARD:PPARG:RARA:RARB:RARG:RORA:RORB:RORC:RXRA:RXRB:RXRG:THRB	GAAASTRGGTCA	1e-10	-24.43	0	28	9.09%	501.5	1.89%
M10447_3.00:ESR1:ESR2:NR1D1:NR1D2:NR1H2:NR1H3:NR1H4:NR2C1:NR2C2:NR2F1:NR2F2:NR2F6:NR4A1:NR4A2:NR4A3:NR5A1:NR5A2:NR6A1:PPARA:PPARD:PPARG:RARA:RARB:RARG:RORA:RORB:RORC:RXRA:RXRB:RXRG:THRA:THRB	GAAASTRGGTCA	1e-10	-24.43	0	28	9.09%	501.5	1.89%
M09960_3.00:JUN:JUNB:JUND	RTGACTCABY	1e-10	-24.29	0	32	10.39%	659.9	2.49%
M12259_3.00:NR1D1:NR1D2:NR2C2:NR2F1:NR2F2:NR2F6:PPARA:PPARD:RARA:RARB:RARG:RORA:RORB:RORC	TAARTAGGTCARD	1e-10	-24.21	0	20	6.49%	241.7	0.91%
M04750_3.00:ZNF524	DCGGGTTCGAGK	1e-10	-24.17	0	14	4.55%	95.3	0.36%
M08323_3.00:CTCF	CACCAGGGGGCGCYRK	1e-10	-24.05	0	12	3.90%	60.3	0.23%
M12536_3.00:THAP1	AACATGGCG	1e-10	-23.86	0	46	14.94%	1306.9	4.94%
M08322_3.00:CTCF	CCACYAGRGGGCGCY	1e-10	-23.44	0	14	4.55%	102	0.39%
M08377_3.00:CTCF	CCACCAGRGGGCGCY	1e-10	-23.39	0	12	3.90%	64.3	0.24%
M08382_3.00:CTCF	CCACCAGRGGGCGCY	1e-10	-23.39	0	12	3.90%	64.3	0.24%
M08383_3.00:CTCF	CCACCAGGGGGCGCY	1e-10	-23.39	0	12	3.90%	64.3	0.24%
M10618_3.00:BATF:BATF3	DATGASTCAT	1e-10	-23.35	0	32	10.39%	685.6	2.59%
M09926_3.00:JUN:JUNB:JUND	DVTGAGTCABH	1e-10	-23.28	0	32	10.39%	687.9	2.60%
M04972_3.00:ELF1:ELF2:ELF4:ELK1:ELK3:ELK4:ERF:ERG:ETS1:ETS2:ETV1:ETV2:ETV3:ETV3L:ETV4:ETV5:FEV:FLI1:GABPA	NACCGGAAGTR	1e-10	-23.08	0	20	6.49%	258	0.97%
M10548_3.00:EOMES:TBR1:TBX21	GDGDAGGTGTGAR	1e-09	-23.01	0	44	14.29%	1242.3	4.69%
M08275_3.00:JUN:JUNB:JUND	VRGGATGASTCAY	1e-09	-22.76	0	20	6.49%	263.6	1.00%
M10429_3.00:HNF4G:NR1H4:NR2C1:NR2C2:NR2F1:NR2F2:NR2F6:NR4A1:NR4A2:NR4A3:NR5A1:NR5A2:NR6A1:PPARA:PPARD:PPARG:RARA:RARB:RARG:RORA:RORB:RORC:RXRA:RXRB:RXRG:THRA:THRB	RGGRTCARRAGTTCAAGGTCA	1e-09	-22.69	0	24	7.79%	395.6	1.49%
M06272_3.00:ESR1:ESR2:NR1D1:NR1D2:NR1H2:NR1H3:NR1H4:NR2C1:NR2C2:NR2F1:NR2F2:NR2F6:NR4A1:NR4A2:NR4A3:NR5A2:NR6A1:PPARA:PPARD:PPARG:RARA:RARB:RARG:RORA:RORB:RORC:RXRA:RXRB:RXRG	RAGGTCAAAAGGTCA	1e-09	-22.6	0	34	11.04%	792.8	2.99%
M04489_3.00:ATF3:JDP2	GATGASTCATS	1e-09	-22.55	0	18	5.84%	208	0.79%
M08351_3.00:CTCF	GCCACCAGRKGGCRS	1e-09	-22.47	0	12	3.90%	70.5	0.27%
M08372_3.00:CTCF	GCCACCAGRKGGCRC	1e-09	-22.47	0	12	3.90%	70.5	0.27%
M10173_3.00:EHF:ELF1:ELF2:ELF3:ELF4:ELF5:ELK1:ELK3:ELK4:ERF:ERG:ETS1:ETS2:ETV1:ETV2:ETV3:ETV3L:ETV4:ETV5:ETV6:ETV7:FEV:FLI1:GABPA:SPDEF	GAACCCGGAAGTGS	1e-09	-22.41	0	14	4.55%	110.5	0.42%
M03590_3.00:ESR1:ESR2:HNF4A:HNF4G:NR1D1:NR1D2:NR1H2:NR1H3:NR1H4:NR2C1:NR2C2:NR2F1:NR2F2:NR2F6:NR4A1:NR4A2:NR4A3:NR5A2:NR6A1:PPARA:PPARD:PPARG:RARA:RARB:RARG:RORA:RORB:RORC:RXRA:RXRB:RXRG:THRA:THRB	RRGGTCAAAAGGTCA	1e-09	-22.09	0	8	2.60%	17.5	0.07%
M08217_3.00:ZNF503:ZNF703	CHCAGCAGGGG	1e-09	-22.09	0	44	14.29%	1280.8	4.84%
M03513_3.00:POU2F1	TWTGMATATKCATD	1e-09	-22.05	0	18	5.84%	215.3	0.81%
M01082_3.00:JUN:JUNB:JUND	NATGACTCAY	1e-09	-22.02	0	32	10.39%	724	2.73%
M09270_3.00:ZNF569	GGAWWAGTAG	1e-09	-21.83	0	24	7.79%	413.1	1.56%
M08350_3.00:CTCF	CCACYAGRGGGCRCY	1e-09	-21.76	0	12	3.90%	75.4	0.28%
M04212_3.00:NFE2:NFE2L1:NFE2L2:NFE2L3	ATGACTCAY	1e-09	-21.73	0	20	6.49%	280.6	1.06%
M09468_3.00:ZNF768	CTCAGAGAGGTTAAG	1e-09	-21.54	0	10	3.25%	43.9	0.17%
M04772_3.00:HIC1	GGTKGGCAYR	1e-09	-21.45	0	86	27.92%	3774	14.25%
M08330_3.00:CTCF	CCACCAGGKGGCRSY	1e-09	-20.97	0	12	3.90%	81.6	0.31%
M02104_3.00:GCM1:GCM2	RCCCGCATNN	1e-09	-20.89	0	66	21.43%	2561	9.67%
M02760_3.00:BACH1:BACH2	ATGACTCAT	1e-09	-20.82	0	20	6.49%	296.1	1.12%
M08698_3.00:JUN:JUNB:JUND	ATGAGTCAT	1e-09	-20.77	0	20	6.49%	298	1.13%
M08232_3.00:ZNF705EP	NVGVGRGGGNGAGGGAYNNN	1e-08	-20.65	0	18	5.84%	236.4	0.89%
M00829_3.00:ATF3:JDP2	NCGTCATCV	1e-08	-20.64	0	86	27.92%	3836.1	14.49%
M04342_3.00:TCF12:TCF3:TCF4	VCACCTGC	1e-08	-20.63	0	144	46.75%	8006.3	30.24%
M01083_3.00:JUN:JUNB:JUND	DTGMGTCAT	1e-08	-20.55	0	92	29.87%	4242.3	16.02%
M11551_3.00:CXXC1	NAVMRMTAAAAAHAACNVMCG	1e-08	-20.51	0	24	7.79%	443.1	1.67%
M08134_3.00:ZNF585A	GAGWACAGA	1e-08	-20.44	0	50	16.23%	1670.2	6.31%
M01289_3.00:YBX1:YBX2:YBX3	NNNGRTRG	1e-08	-20.27	0	284	92.21%	21107.1	79.72%
M04475_3.00:BATF:BATF3	GATGACGTCAYC	1e-08	-20.18	0	16	5.19%	185.6	0.70%
M04544_3.00:JUN:JUNB:JUND	KATGMGTCATC	1e-08	-20.12	0	20	6.49%	309.1	1.17%
M04236_3.00:ATF3:JDP2	ATGACGTCAC	1e-08	-20.09	0	22	7.14%	379.8	1.43%
M03313_3.00:ALX1:ALX3:ALX4:ARX:DRGX:EN1:EN2:ESX1:ISX:LHX2:LHX3:LHX4:LHX6:LHX8:LHX9:LMX1A:LMX1B:MIXL1:OTP:PHOX2A:PHOX2B:PROP1:PRRX1:PRRX2:RAX:RAX2:SEBOX:SHOX:SHOX2:UNCX:VSX1:VSX2:ZFHX2	TAATYARCRCTAATTA	1e-08	-20.07	0	6	1.95%	6.1	0.02%
M03556_3.00:MYB:MYBL1	YAACSGTTWTAACSGYC	1e-08	-20.07	0	6	1.95%	6.1	0.02%
M04032_3.00:ALX1:ALX3:ALX4:ARX:BARHL1:BARHL2:BSX:DLX1:DLX2:DLX3:DLX4:DLX5:DLX6:DRGX:EMX1:EMX2:EN1:EN2:ESX1:GBX1:GBX2:GSX1:GSX2:HESX1:HMX1:HMX2:HMX3:HOXA3:HOXB3:HOXD3:ISX:LBX1:LBX2:LHX1:LHX2:LHX3:LHX4:LHX5:LHX6:LHX8:LHX9:LMX1A:LMX1B:MEOX1:MIXL1:MSX1:MSX2:NKX1-1:NKX1-2:NOBOX:NOTO:OTP:PDX1:PHOX2A:PHOX2B:PROP1:PRRX1:PRRX2:RAX:RAX2:SEBOX:SHOX:SHOX2:UNCX:VAX1:VAX2:VSX1:VSX2:ZFHX2	GYTAATTRRSSYYAATTARC	1e-08	-20.07	0	6	1.95%	6.1	0.02%
M09128_3.00:ZNF226	AATDAGATAAATAGGAAAHC	1e-08	-20.07	0	6	1.95%	6.1	0.02%
M09407_3.00:ZNF263	RRSRGGGAGCACBGHSVVGSR	1e-08	-20.04	0	16	5.19%	187.4	0.71%
M11098_3.00:BACH1:BACH2	ANSATGAGTCATGVT	1e-08	-19.93	0	10	3.25%	52.2	0.20%
M11139_3.00:MAF:MAFA:MAFB:MAFG:MAFK	TGASTCAGCDY	1e-08	-19.86	0	20	6.49%	314.9	1.19%
M04457_3.00:ATF2	SATKACRTCAYS	1e-08	-19.83	0	34	11.04%	886.2	3.35%
M10452_3.00:ESR1:ESR2:NR1D1:NR1D2:NR1H2:NR1H3:NR1H4:NR2C1:NR2C2:NR2F1:NR2F2:NR2F6:NR4A1:NR5A2:NR6A1:PPARA:PPARD:PPARG:RARA:RARB:RARG:RORA:RORB:RORC:RXRA:RXRB:RXRG	GGGTCARRAGTTCAAGGTCA	1e-08	-19.75	0	16	5.19%	191.6	0.72%
M12642_3.00:JUN:JUNB:JUND	ATGAGTCA	1e-08	-19.67	0	32	10.39%	800.4	3.02%
M10304_3.00:ALX1:ALX3:ALX4:ARX:BARHL1:BARHL2:BARX1:BARX2:BSX:DLX1:DLX2:DLX3:DLX4:DLX5:DLX6:DRGX:EMX1:EMX2:EN1:EN2:ESX1:EVX1:EVX2:GBX1:GBX2:GSX1:GSX2:HOXA1:HOXA2:HOXA3:HOXA4:HOXA5:HOXB1:HOXB2:HOXB3:HOXB4:HOXB5:HOXC4:HOXC5:HOXD1:HOXD3:HOXD4:ISX:MEOX1:MEOX2:MIXL1:MNX1:MSX1:MSX2:NANOG:NANOGP8:NKX1-1:NKX1-2:OTP:PDX1:PHOX2A:PHOX2B:PROP1:PRRX1:PRRX2:RAX:RAX2:SEBOX:SHOX:SHOX2:UNCX:VAX1:VAX2:VENTX:VSX1:VS…	KYTAATTGTTTT	1e-08	-19.66	0	38	12.34%	1084.9	4.10%
M02160_3.00:ALX1:ALX3:ALX4:ARX:BARX1:BARX2:DRGX:EN1:EN2:ESX1:EVX1:EVX2:GBX1:GBX2:HESX1:HOXA4:HOXA5:HOXB4:HOXB5:HOXC4:HOXC5:HOXD4:ISX:LBX1:LBX2:LHX2:LHX3:LHX4:LHX9:LMX1A:LMX1B:MEOX2:MIXL1:MNX1:MSX1:MSX2:NKX1-1:NKX1-2:NOBOX:OTP:PDX1:PHOX2A:PHOX2B:PROP1:PRRX1:PRRX2:RAX:RAX2:SEBOX:SHOX:SHOX2:UNCX:VSX1:VSX2	NNTTAATTAGY	1e-08	-19.64	0	32	10.39%	801.8	3.03%
M07971_3.00:CTCF	GCCASYAGGKGGCRS	1e-08	-19.54	0	14	4.55%	140.6	0.53%
M03101_3.00:ZNF75A:ZNF75D	TGTGGGAAAAGC	1e-08	-19.33	0	12	3.90%	95	0.36%
M11054_3.00:ATF1:CREB1:CREM	BGSTGACGTCA	1e-08	-19.29	0	34	11.04%	906.2	3.42%
M08274_3.00:JUN:JUNB:JUND	RDRNATGAGTCATCA	1e-08	-18.99	0	10	3.25%	58.7	0.22%
M11246_3.00:REST	AAGGTGCT	1e-08	-18.93	0	86	27.92%	3976.9	15.02%
M08376_3.00:CTCF	CCACCAGGGGGCGC	1e-08	-18.9	0	12	3.90%	99.1	0.37%
M01077_3.00:JUN:JUNB:JUND	WTGMGTCAT	1e-08	-18.83	0	124	40.26%	6680.3	25.23%
M04469_3.00:ATF1:CREB1:CREM	NRTGACGTCAYN	1e-08	-18.82	0	22	7.14%	408	1.54%
M09842_3.00:EPAS1:HIF1A	GKCACGTAC	1e-08	-18.76	0	30	9.74%	741.7	2.80%
M08696_3.00:BATF:BATF3	TGAGTCA	1e-08	-18.73	0	44	14.29%	1434.6	5.42%
M08701_3.00:BATF:BATF3	TGAGTCA	1e-08	-18.73	0	44	14.29%	1434.6	5.42%
M06229_3.00:JUN:JUNB:JUND	VBDATGACGTCATCHAK	1e-08	-18.7	0	12	3.90%	102	0.39%
M05811_3.00:ESR1:ESR2:NR1D1:NR1D2:NR1H2:NR1H3:NR1H4:NR2C1:NR2C2:NR2F1:NR2F2:NR2F6:NR4A1:NR5A2:NR6A1:PPARA:PPARD:PPARG:RARA:RARB:RARG:RORA:RORB:RORC:RXRA:RXRB:RXRG	RRGGTCANRRGGTCAN	1e-08	-18.68	0	32	10.39%	835.4	3.16%
M08723_3.00:ZEB1:ZEB2	CAGGTG	1e-08	-18.65	0	108	35.06%	5527.4	20.88%
M05606_3.00:DUXA	TAAYBTAATCA	1e-08	-18.64	0	14	4.55%	151.5	0.57%
M08734_3.00:CTCF	GCCACYAGGGGGCRC	1e-08	-18.5	0	12	3.90%	104	0.39%
M10169_3.00:ELF1:ELF2:ELF4:ELK1:ELK3:ELK4:ERF:ERG:ETS1:ETS2:ETV1:ETV2:ETV3:ETV3L:ETV4:ETV5:FEV:FLI1:GABPA	GRCCGGAAGTG	1e-07	-18.41	0	24	7.79%	496.7	1.88%
M08273_3.00:JUN:JUNB:JUND	ATGACTCAYCC	1e-07	-18.36	0	20	6.49%	345.8	1.31%
M03853_3.00:CREBL2	GTKACGTCAT	1e-07	-18.3	0	24	7.79%	499.3	1.89%
M05814_3.00:ESR1:ESR2:NR1D1:NR1D2:NR1H2:NR1H3:NR1H4:NR2C1:NR2C2:NR2F1:NR2F2:NR2F6:NR4A1:NR5A2:NR6A1:PPARA:PPARD:PPARG:RARA:RARB:RARG:RORA:RORB:RORC:RXRA:RXRB:RXRG	RAGGTCAWRRGGTCAN	1e-07	-18.17	0	32	10.39%	854.8	3.23%
M03863_3.00:ATF1:CREB1:CREM	RTGACGTCAY	1e-07	-18.14	0	18	5.84%	280.4	1.06%
M10172_3.00:EHF:ELF1:ELF2:ELF3:ELF4:ELF5:ELK1:ELK3:ELK4:ERF:ERG:ETS1:ETS2:ETV1:ETV2:ETV3:ETV3L:ETV4:ETV5:ETV6:ETV7:FEV:FLI1:GABPA:SPDEF	RAVCCGGAAGTGR	1e-07	-18.14	0	18	5.84%	280.7	1.06%
M00791_3.00:JUN:JUNB:JUND	NTGMGTCATM	1e-07	-18.02	0	46	14.94%	1579.5	5.97%
M04030_3.00:ALX1:ALX3:ALX4:ARX:BARHL1:BARHL2:BSX:DLX1:DLX2:DLX3:DLX4:DLX5:DLX6:DRGX:EMX1:EMX2:EN1:EN2:ESX1:GBX1:GBX2:GSX1:GSX2:HESX1:HMX1:HMX2:HMX3:HOXA3:HOXB3:HOXD3:ISX:LBX1:LBX2:LHX1:LHX2:LHX3:LHX4:LHX5:LHX6:LHX8:LHX9:LMX1A:LMX1B:MEOX1:MIXL1:MSX1:MSX2:NKX1-1:NKX1-2:NOBOX:NOTO:OTP:PDX1:PHOX2A:PHOX2B:PROP1:PRRX1:PRRX2:RAX:RAX2:SEBOX:SHOX:SHOX2:UNCX:VAX1:VAX2:VSX1:VSX2:ZFHX2	VYTAATTAAB	1e-07	-18.01	0	28	9.09%	678	2.56%
M06468_3.00:EGR1:EGR2:EGR3:EGR4	GTGYGTGGGCGKGG	1e-07	-18.01	0	24	7.79%	507.3	1.92%
M03864_3.00:ATF1:CREB1:CREM	RTGACGTCAY	1e-07	-17.99	0	18	5.84%	283.1	1.07%
M03492_3.00:ALX1:ALX3:ALX4:ARX:DRGX:EN1:EN2:ESX1:ISX:LHX2:LHX3:LHX4:LHX6:LHX8:LHX9:LMX1A:LMX1B:MIXL1:OTP:PHOX2A:PHOX2B:PROP1:PRRX1:PRRX2:RAX:RAX2:SEBOX:SHOX:SHOX2:UNCX:VSX1:VSX2:ZFHX2	CTAATTAVCVCTAATTAV	1e-07	-17.95	0	6	1.95%	10.9	0.04%
M03994_3.00:ALX1:ALX3:ALX4:ARX:BARHL1:BARHL2:BARX1:BARX2:BSX:DRGX:EMX1:EMX2:EN1:EN2:ESX1:EVX1:EVX2:GBX1:GBX2:GSX1:GSX2:HESX1:HMX1:HMX2:HMX3:HOXA1:HOXA2:HOXA3:HOXA4:HOXA5:HOXB1:HOXB2:HOXB3:HOXB4:HOXB5:HOXC4:HOXC5:HOXD3:HOXD4:LHX2:LHX3:LHX4:LHX9:MEOX1:MEOX2:MIXL1:MNX1:MSX1:MSX2:NKX1-1:NKX1-2:NOTO:OTP:PDX1:PHOX2A:PHOX2B:PROP1:PRRX1:PRRX2:RAX:RAX2:SEBOX:SHOX:SHOX2:TLX1:TLX2:TLX3:UNCX:VAX1:VAX2:VENTX:…	BTAATTAGCGCTAATTAS	1e-07	-17.95	0	6	1.95%	10.7	0.04%
M06058_3.00:ZNF226	RTNNGATAAATNGGMAWHCB	1e-07	-17.95	0	6	1.95%	10.7	0.04%
M08113_3.00:ZNF567	AAAMARTMAATARAAGMAGACCCTSAGATG	1e-07	-17.95	0	6	1.95%	10.4	0.04%
M09392_3.00:ZNF234	AGTGAGATAAATRGGWGANW	1e-07	-17.95	0	6	1.95%	10.2	0.04%
M10030_3.00:KLF15	GGGGAGGRGVDGGGGGGGG	1e-07	-17.94	0	16	5.19%	219.4	0.83%
M10110_3.00:KLF15	GGGGAGGRGVDGGGGGGGG	1e-07	-17.94	0	16	5.19%	219.4	0.83%
M00180_3.00:ATF3:JDP2	NBRCGTCAYH	1e-07	-17.84	0	86	27.92%	4070.7	15.38%
M08326_3.00:CTCF	GCCACYAGRGGGCRS	1e-07	-17.82	0	12	3.90%	110.5	0.42%
M02107_3.00:GCM1:GCM2	HACCCGCATN	1e-07	-17.69	0	44	14.29%	1487.8	5.62%
M08694_3.00:ATF2	ATGACVTCAT	1e-07	-17.66	0	26	8.44%	601.8	2.27%
M03036_3.00:NFE2:NFE2L1:NFE2L2:NFE2L3	VATGACTCATC	1e-07	-17.63	0	10	3.25%	68.7	0.26%
M11395_3.00:ZNF354C	SGTGG	1e-07	-17.6	0	262	85.06%	18957.1	71.60%
M08375_3.00:CTCF	GCCACYAGRKGGCRS	1e-07	-17.55	0	12	3.90%	113.1	0.43%
M04223_3.00:ATF6:ATF6B	TAGTCACGTGK	1e-07	-17.52	0	6	1.95%	11.5	0.04%
M03356_3.00:ALX1:ALX3:ALX4:ARX:BARHL1:BARHL2:BARX1:BARX2:BSX:DLX2:DRGX:EMX1:EMX2:EN1:EN2:ESX1:EVX1:EVX2:GBX1:GBX2:GSX1:GSX2:HESX1:HMX1:HMX2:HMX3:HOXA1:HOXA2:HOXA3:HOXA4:HOXA5:HOXB1:HOXB2:HOXB3:HOXB4:HOXB5:HOXC4:HOXC5:HOXD3:HOXD4:LHX2:LHX3:LHX4:LHX9:MEOX1:MEOX2:MIXL1:MNX1:MSX1:MSX2:NKX1-1:NKX1-2:NOTO:OTP:PDX1:PHOX2A:PHOX2B:PROP1:PRRX1:PRRX2:RAX:RAX2:SEBOX:SHOX:SHOX2:TLX1:TLX2:TLX3:UNCX:VAX1:VAX2:V…	TAATTARCTAATTA	1e-07	-17.5	0	10	3.25%	69.2	0.26%
M11063_3.00:ATF2	VGTGACGTCAW	1e-07	-17.5	0	48	15.58%	1719	6.49%
M10956_3.00:BHLHE40:BHLHE41	SNTCACGTGS	1e-07	-17.47	0	46	14.94%	1609.1	6.08%
M08405_3.00:EHF:ELF1:ELF2:ELF3:ELF4:ELF5:ELK1:ELK3:ELK4:ERF:ERG:ETS1:ETS2:ETV1:ETV2:ETV3:ETV3L:ETV4:ETV5:ETV6:ETV7:FEV:FLI1:GABPA:SPDEF	SGRACCCGGAAGTGG	1e-07	-17.37	0	8	2.60%	35.8	0.14%
M09316_3.00:ZNF813	GAAGGAGGGARGGRV	1e-07	-17.35	0	16	5.19%	229.1	0.87%
M03444_3.00:POU5F1B	WTGCATATTCAT	1e-07	-17.34	0	18	5.84%	296.5	1.12%
M04546_3.00:JUN:JUNB:JUND	KATGASTCATM	1e-07	-17.28	0	12	3.90%	116.2	0.44%
M02188_3.00:ARX:BARHL1:BARHL2:BARX1:BARX2:BSX:DLX1:DLX2:DLX3:DLX4:DLX5:DLX6:EMX1:EMX2:ESX1:EVX1:EVX2:GBX1:GBX2:HMX1:HMX2:HMX3:HOXA2:HOXB2:LBX1:LBX2:MEOX1:MEOX2:MNX1:MSX1:MSX2:NANOG:NANOGP8:NKX1-1:NKX1-2:PDX1:RAX:RAX2:TLX1:TLX2:TLX3:UNCX:VAX1:VAX2	NTVTTAATTGGTN	1e-07	-17.22	0	28	9.09%	704.8	2.66%
M11890_3.00:ALX1:ALX3:ALX4:ARX:BARX1:BARX2:BSX:DLX2:DLX3:DRGX:EMX1:EMX2:EN1:EN2:ESX1:EVX1:EVX2:GBX1:GBX2:GSX1:GSX2:HESX1:HOXA2:HOXA3:HOXB2:HOXB3:HOXD3:ISX:LBX1:LBX2:LHX1:LHX2:LHX3:LHX4:LHX5:LHX6:LHX8:LHX9:LMX1A:LMX1B:MEOX1:MIXL1:MNX1:MSX1:MSX2:NKX1-1:NKX1-2:NOBOX:NOTO:OTP:PDX1:PHOX2A:PHOX2B:PROP1:PRRX1:PRRX2:RAX:RAX2:SEBOX:SHOX:SHOX2:UNCX:VAX1:VAX2:VSX1:VSX2:ZFHX2	WWDANYYAATTARCSW	1e-07	-17.21	0	24	7.79%	530.2	2.00%
M00367_3.00:CRX:DMBX1:DPRX:GSC:GSC2:OTX1:OTX2:PITX1:PITX2:PITX3:TPRX1	NNNTATTAATTAN	1e-07	-17.2	0	46	14.94%	1624.1	6.13%
M08355_3.00:CTCF	CCACYAGRKGGCRST	1e-07	-17.19	0	12	3.90%	117.6	0.44%
M06581_3.00:ELF1:ELF2:ELF4:ELK1:ELK3:ELK4:ERF:ERG:ETS1:ETS2:ETV1:ETV2:ETV3:ETV3L:ETV4:ETV5:ETV6:ETV7:FEV:FLI1:GABPA	ACCGGAAGT	1e-07	-17.11	0	14	4.55%	172.4	0.65%
M11584_3.00:EBF1:EBF2:EBF3:EBF4	KTCCCTTGGGA	1e-07	-17.08	0	22	7.14%	452.8	1.71%
M11761_3.00:ALX1:ALX3:ALX4:ARX:BARHL1:BARHL2:BARX1:BARX2:BSX:DLX1:DLX2:DLX3:DLX4:DLX5:DLX6:DRGX:EMX2:EN1:EN2:GBX1:GBX2:GSX1:GSX2:HOXA1:HOXA2:HOXA3:HOXB1:HOXB2:HOXB3:HOXD1:HOXD3:ISX:LHX1:LHX5:MEOX1:MEOX2:MNX1:MSX1:MSX2:NANOG:NANOGP8:NKX1-1:NKX1-2:PDX1:PHOX2A:PHOX2B:PROP1:PRRX1:PRRX2:SHOX:SHOX2:UNCX:VAX1:VAX2:VSX1:VSX2	CHCYWAATTAAH	1e-07	-17	0	60	19.48%	2459	9.29%
M06226_3.00:JUN:JUNB:JUND	ATGACGTCAT	1e-07	-16.91	0	24	7.79%	539.4	2.04%
M11378_3.00:E4F1	RTGACGTAAC	1e-07	-16.91	0	18	5.84%	305.6	1.15%
M05087_3.00:GCM1:GCM2	CACCCGCAY	1e-07	-16.88	0	64	20.78%	2714.8	10.25%
M05030_3.00:FOXI1:FOXJ3:FOXK1:FOXK2	YTGTTTACRWN	1e-07	-16.87	0	48	15.58%	1756.5	6.63%
M05251_3.00:NKX2-1:NKX2-2:NKX2-3:NKX2-4:NKX2-5:NKX2-6:NKX2-8	STCAACGMB	1e-07	-16.86	0	76	24.68%	3488.3	13.18%
M00173_3.00:TCF12:TCF3:TCF4	VCACCTGB	1e-07	-16.83	0	146	47.40%	8608.8	32.52%
M10617_3.00:FOS:FOSB:FOSL1:FOSL2	NATGASTCABNN	1e-07	-16.78	0	32	10.39%	909.6	3.44%
M05491_3.00:SIX1:SIX2:SIX4:SIX5	MCGTATCRYY	1e-07	-16.7	0	26	8.44%	632.4	2.39%
M10177_3.00:EHF:ELF1:ELF2:ELF3:ELF4:ELF5:ETV6:ETV7:SPI1:SPIC	GGAASSAGGAAGTGR	1e-07	-16.69	0	16	5.19%	241.7	0.91%
M03195_3.00:ELF1:ERF:ETV6	MGCGGAAGTG	1e-07	-16.64	0	20	6.49%	385.2	1.46%
M10180_3.00:ELF1:ELF2:ELF4:ELK1:ELK3:ELK4:ERF:ERG:ETS1:ETS2:ETV1:ETV2:ETV3:ETV3L:ETV4:ETV5:FEV:FLI1:GABPA	RGRCAGGAAGYGG	1e-07	-16.61	0	34	11.04%	1015.2	3.83%
M10613_3.00:FOS:FOSB:FOSL1:FOSL2	NNATGASTCATH	1e-07	-16.56	0	32	10.39%	918.1	3.47%
M10375_3.00:BORCS8-MEF2B:MEF2A:MEF2B:MEF2C:MEF2D	DKCTATTTTTAGCH	1e-07	-16.53	0	52	16.88%	2009	7.59%
M11630_3.00:ELF1:ELF2:ELF4:ELK1:ELK3:ELK4:ERF:ERG:ETS1:ETS2:ETV1:ETV2:ETV3:ETV3L:ETV4:ETV5:FEV:FLI1:GABPA	RCCGGAAGTGCA	1e-07	-16.46	0	14	4.55%	182	0.69%
M03359_3.00:ALX1:ALX3:ALX4:ARX:BARHL1:BARHL2:BARX1:BARX2:BSX:DLX1:DLX2:DLX3:DLX4:DLX5:DLX6:DRGX:EMX1:EMX2:EN1:EN2:ESX1:EVX1:EVX2:GBX1:GBX2:GSX1:GSX2:HMX1:HMX2:HMX3:HOXA1:HOXA2:HOXA3:HOXA4:HOXA5:HOXA6:HOXA7:HOXB1:HOXB2:HOXB3:HOXB4:HOXB5:HOXB6:HOXB7:HOXB8:HOXC4:HOXC5:HOXC6:HOXD1:HOXD3:HOXD4:HOXD8:ISX:LHX3:LHX4:MEOX1:MEOX2:MIXL1:MNX1:MSX1:MSX2:NANOG:NANOGP8:NKX1-1:NKX1-2:NOBOX:NOTO:OTP:PDX1:PHOX2A:P…	YTAATTASYVYTAATTAS	1e-07	-16.41	0	6	1.95%	14.8	0.06%
M02252_3.00:ALX1:ALX3:ALX4:ARX:BARHL1:BARHL2:BSX:DLX1:DLX2:DLX3:DLX4:DLX5:DLX6:DRGX:EN1:EN2:ESX1:GBX1:GBX2:HESX1:HOXA2:HOXB2:ISX:LBX1:LBX2:LHX1:LHX2:LHX3:LHX4:LHX5:LHX9:MEOX1:MIXL1:MNX1:MSX1:MSX2:NANOG:NANOGP8:NOBOX:OTP:PHOX2A:PHOX2B:PROP1:PRRX1:PRRX2:RAX:RAX2:SEBOX:SHOX:SHOX2:UNCX:VSX1:VSX2	TTAATTAG	1e-07	-16.39	0	42	13.64%	1447.9	5.47%
M10616_3.00:ATF2:CREB5	ATGACGTCAYYN	1e-07	-16.39	0	32	10.39%	925.6	3.50%
M09911_3.00:ATF2	ATGACVTCAYY	1e-07	-16.32	0	32	10.39%	928.8	3.51%
M09950_3.00:ATF2:CREB5	ATGACVTCAYY	1e-07	-16.32	0	32	10.39%	928.8	3.51%
M10952_3.00:MYF5:MYF6:MYOD1:MYOG	CAGCTG	1e-07	-16.3	0	164	53.25%	10132.8	38.27%
M04456_3.00:ATF2	BRTKACGTCAYN	1e-07	-16.3	0	32	10.39%	929.8	3.51%
M05186_3.00:HOXA13:HOXB13:HOXC13:HOXD13	DTTTTACGAGV	1e-07	-16.24	0	10	3.25%	81	0.31%
M08695_3.00:ATF1:CREB1:CREM	TGACATCA	1e-07	-16.24	0	54	17.53%	2147.6	8.11%
M10983_3.00:TCF12:TCF3:TCF4	CAGGTGY	1e-07	-16.14	0	120	38.96%	6681.6	25.24%
M04077_3.00:ALX1:ALX3:ALX4:ARX:DRGX:EN1:EN2:ESX1:HESX1:ISX:LHX2:LHX3:LHX4:LHX6:LHX8:LHX9:LMX1A:LMX1B:MIXL1:NOBOX:OTP:PHOX2A:PHOX2B:PROP1:PRRX1:PRRX2:RAX:RAX2:SEBOX:SHOX:SHOX2:UNCX:VSX1:VSX2:ZFHX2	TTAATTAA	1e-06	-16.11	0	44	14.29%	1574.6	5.95%
M08244_3.00:USF2	GGGTCACGTGRCCSSG	1e-06	-16.08	0	6	1.95%	15.1	0.06%
M08266_3.00:USF1:USF2	GGGTCACGTGRCSSS	1e-06	-16.08	0	6	1.95%	15.1	0.06%
M06812_3.00:ESR1:ESR2:NR1D1:NR1D2:NR1H2:NR1H3:NR2C1:NR2C2:NR2F1:NR2F2:NR2F6:NR5A2:NR6A1:PPARA:PPARD:PPARG:RARA:RARB:RARG:RORA:RORB:RORC:RXRA:RXRB:RXRG:THRA:THRB	TAWDTRGGTCA	1e-06	-16.08	0	22	7.14%	480	1.81%
M10178_3.00:ELF1:ELF2:ELF4:ELK1:ELK3:ELK4:ERF:ERG:ETS1:ETS2:ETV1:ETV2:ETV3:ETV3L:ETV4:ETV5:FEV:FLI1:GABPA	GRRGGMAGGAAGGRRGGR	1e-06	-16.01	0	20	6.49%	401.9	1.52%
M02228_3.00:NKX6-1:NKX6-2:NKX6-3	TTAATDGVN	1e-06	-16.01	0	114	37.01%	6247.4	23.60%
M10964_3.00:ARNTL	AGCCACGTGA	1e-06	-15.97	0	12	3.90%	132.3	0.50%
M08178_3.00:ZNF783	GGMCGCSG	1e-06	-15.96	0	14	4.55%	190.7	0.72%
M04242_3.00:JUN:JUNB:JUND	ATGACGTCAY	1e-06	-15.96	0	18	5.84%	326.4	1.23%
M04031_3.00:ALX1:ALX3:ALX4:ARX:BARHL1:BARHL2:BSX:DLX1:DLX2:DLX3:DLX4:DLX5:DLX6:DRGX:EMX1:EMX2:EN1:EN2:ESX1:GBX1:GBX2:GSX1:GSX2:HESX1:HMX1:HMX2:HMX3:HOXA3:HOXB3:HOXD3:ISX:LBX1:LBX2:LHX1:LHX2:LHX3:LHX4:LHX5:LHX6:LHX8:LHX9:LMX1A:LMX1B:MEOX1:MIXL1:MSX1:MSX2:NKX1-1:NKX1-2:NOBOX:NOTO:OTP:PDX1:PHOX2A:PHOX2B:PROP1:PRRX1:PRRX2:RAX:RAX2:SEBOX:SHOX:SHOX2:UNCX:VAX1:VAX2:VSX1:VSX2:ZFHX2	RCTAATTAAC	1e-06	-15.95	0	36	11.69%	1148.7	4.34%
M06221_3.00:FOSL2	ATGACGTCAT	1e-06	-15.92	0	18	5.84%	327.1	1.24%
M04051_3.00:BARHL1:BARHL2:BSX:EMX1:EMX2:EN1:EN2:GSX1:GSX2:HMX1:HMX2:HMX3:HOXA3:HOXA4:HOXA5:HOXB3:HOXB4:HOXB5:HOXC4:HOXC5:HOXD3:HOXD4:MEOX2:NKX1-1:NKX1-2:NKX6-1:NKX6-2:NKX6-3:NOBOX:PDX1:TLX1:TLX2:TLX3:VAX1:VAX2	RTTAAACGGTW	1e-06	-15.91	0	16	5.19%	256	0.97%
M10157_3.00:E2F1:E2F2:E2F3:E2F4:E2F5:E2F6	RGGGCGGGARRRR	1e-06	-15.88	0	28	9.09%	753.7	2.85%
M03040_3.00:ATF3:JDP2	ATGASTCAT	1e-06	-15.82	0	10	3.25%	85	0.32%
M03042_3.00:ATF3:JDP2	ATGACTCAT	1e-06	-15.82	0	10	3.25%	85	0.32%
M03065_3.00:ATF3:JDP2	ATGACTCAT	1e-06	-15.82	0	10	3.25%	85	0.32%
M04491_3.00:ATF3:JDP2	GATGASTCATC	1e-06	-15.82	0	10	3.25%	85	0.32%
M10928_3.00:TFAP4	NGVCCRCAGCTGK	1e-06	-15.78	0	26	8.44%	665	2.51%
M11774_3.00:ALX1:ALX3:ALX4:ARX:BARX1:BARX2:BSX:DLX1:DLX2:DLX3:DLX4:DLX5:DLX6:DRGX:EMX1:EMX2:EN1:EN2:ESX1:EVX1:EVX2:GBX1:GBX2:GSX1:GSX2:HMX1:HMX3:HOXA1:HOXA2:HOXA3:HOXA4:HOXA5:HOXA7:HOXB1:HOXB2:HOXB3:HOXB4:HOXB5:HOXB7:HOXC4:HOXC5:HOXD1:HOXD3:HOXD4:ISX:LHX3:LHX4:MEOX1:MEOX2:MIXL1:MNX1:MSX1:MSX2:NANOG:NANOGP8:NKX1-1:NKX1-2:NOTO:OTP:PDX1:PHOX2A:PHOX2B:PROP1:PRRX1:PRRX2:RAX:RAX2:SEBOX:SHOX:SHOX2:UNCX:…	VMHAWTABG	1e-06	-15.77	0	138	44.81%	8111.3	30.64%
M09063_3.00:ZSCAN31	DWVTTAATTGGTTTTT	1e-06	-15.62	0	10	3.25%	86.2	0.33%
M02608_3.00:LIN54	DTTTGAAH	1e-06	-15.44	0	190	61.69%	12453.5	47.04%
M11227_3.00:SNAI2	KCAGGTGM	1e-06	-15.43	0	70	22.73%	3215.3	12.14%
M05638_3.00:PAX4	TAATTAGCTAATTA	1e-06	-15.42	0	10	3.25%	88.1	0.33%
M10608_3.00:ATF1:CREB1:CREM	TGACGTCATC	1e-06	-15.41	0	38	12.34%	1282.2	4.84%
M06188_3.00:MSANTD4	NDVSNNKKAGTARNTNN	1e-06	-15.36	0	28	9.09%	773.3	2.92%
M08975_3.00:MXI1	CCACGTGG	1e-06	-15.33	0	26	8.44%	680.7	2.57%
M04893_3.00:DMRT1:DMRT2:DMRT3:DMRTA2:DMRTC2	AATTGMTACATT	1e-06	-15.25	0	18	5.84%	343.9	1.30%
M06270_3.00:ESR1:ESR2:NR1D1:NR1D2:NR1H2:NR1H3:NR1H4:NR2C1:NR2C2:NR2F1:NR2F2:NR2F6:NR4A1:NR4A2:NR4A3:NR5A1:NR5A2:NR6A1:PPARA:PPARD:PPARG:RARA:RARB:RARG:RORA:RORB:RORC:RXRA:RXRB:RXRG:THRA:THRB	AWTTAGGTCAH	1e-06	-15.22	0	30	9.74%	876.4	3.31%
M09993_3.00:MAZ	GGGGGAGGGGGDGGGRGRGGRG	1e-06	-15.2	0	18	5.84%	344.3	1.30%
M10111_3.00:MAZ	GGGGGAGGGGGDGGGRGRGGRG	1e-06	-15.2	0	18	5.84%	344.3	1.30%
M03750_3.00:EOMES:TBR1:TBX21	GGTGTGAWWTCACACC	1e-06	-15.19	0	4	1.30%	2	0.01%
M04462_3.00:ATF1:CREB1:CREM	SRTGACGTCACS	1e-06	-15.09	0	28	9.09%	784.5	2.96%
M08621_3.00:RELA	RSAGGRVWGGRGARGVGGRGGGAGGAAGRR	1e-06	-15.08	0	8	2.60%	49.6	0.19%
M12158_3.00:MECP2	RSTTAYAAAGCT	1e-06	-15.06	0	34	11.04%	1087.3	4.11%
M08725_3.00:ZNF263	GGGAGGA	1e-06	-15.02	0	46	14.94%	1754.6	6.63%
M09119_3.00:ZNF208	RGGSAGGRDGRRRARWRRGAAGAG	1e-06	-15.02	0	20	6.49%	428.9	1.62%
M10277_3.00:DBX2:NKX3-1:NKX3-2	NTTAAGTGCTTD	1e-06	-15.01	0	30	9.74%	885.3	3.34%
M10307_3.00:DBX2:NKX3-1:NKX3-2	NTTAAGTGCTTD	1e-06	-15.01	0	30	9.74%	885.3	3.34%
M10916_3.00:TCF12:TCF3:TCF4	GMCACCTG	1e-06	-14.97	0	146	47.40%	8849.1	33.42%
M04540_3.00:FOS:FOSB:FOSL1:FOSL2	KATGASTCAYC	1e-06	-14.96	0	18	5.84%	350.2	1.32%
M03497_3.00:PAX3:PAX7	TAATCGATTA	1e-06	-14.95	0	10	3.25%	93.7	0.35%
M04892_3.00:DMRT1:DMRT2:DMRT3:DMRTA2:DMRTC2	GAACGATACA	1e-06	-14.94	0	6	1.95%	19	0.07%
M08265_3.00:USF1:USF2	SSSSGYCACGTGACC	1e-06	-14.94	0	6	1.95%	19.3	0.07%
M04474_3.00:BATF:BATF3	SRTGACGTCAYC	1e-06	-14.85	0	18	5.84%	353.2	1.33%
M04410_3.00:FIGLA	MCAGGTGKT	1e-06	-14.82	0	82	26.62%	4079.6	15.41%
M04757_3.00:KLF17	RAKGGGTGSGTGGTG	1e-06	-14.77	0	16	5.19%	280.6	1.06%
M08380_3.00:CTCF	CCACCAGGGGGCG	1e-06	-14.76	0	12	3.90%	149.4	0.56%
M04434_3.00:ATF1:CREB1:CREM	BRTGACATCACN	1e-06	-14.7	0	22	7.14%	522.2	1.97%
M01822_3.00:TCF12:TCF3:TCF4	VCAGGTGBN	1e-06	-14.7	0	128	41.56%	7468.3	28.21%
M01898_3.00:JUN:JUNB:JUND	WTRCGTCAT	1e-06	-14.69	0	110	35.71%	6103.1	23.05%
M02745_3.00:MITF:TFE3	GTCACGTGAC	1e-06	-14.69	0	6	1.95%	20	0.08%
M06256_3.00:CRX:DLX1:DLX2:DLX4:DLX5:EMX1:LHX2:LHX9:PITX1:PITX2:VAX1:VSX1	RGCTAATTAN	1e-06	-14.64	0	62	20.13%	2763.1	10.44%
M09863_3.00:MITF:TFE3:TFEB:TFEC	GGTCACGTGA	1e-06	-14.5	0	14	4.55%	216.3	0.82%
M04960_3.00:EHF:ELF1:ELF2:ELF3:ELF4:ELF5:ETV6:ETV7:SPI1:SPIC	NABGMGGAAGTR	1e-06	-14.49	0	50	16.23%	2027.6	7.66%
M02746_3.00:USF2	GTCACGTGAC	1e-06	-14.45	0	6	1.95%	21.1	0.08%
M03608_3.00:ESR1:ESR2:HNF4A:HNF4G:NR1D1:NR1D2:NR1H2:NR1H3:NR1H4:NR2C1:NR2C2:NR2F1:NR2F2:NR2F6:NR4A1:NR4A2:NR4A3:NR5A2:NR6A1:PPARA:PPARD:PPARG:RARA:RARB:RARG:RORA:RORB:RORC:RXRA:RXRB:RXRG:THRA:THRB	RRGGTCAAAAGGTCAH	1e-06	-14.41	0	8	2.60%	54	0.20%
M03623_3.00:NR1H2:NR1H3:NR1H4:NR2C1:NR2C2:NR2F1:NR2F2:NR2F6:NR4A1:NR4A2:NR4A3:NR5A1:NR5A2:NR6A1:PPARA:PPARD:PPARG:RARA:RARB:RARG:RORA:RORB:RORC:RXRA:RXRB:RXRG:THRA:THRB	GAGGTCAAAAGGTCA	1e-06	-14.41	0	8	2.60%	54	0.20%
M01832_3.00:TCF12:TCF3:TCF4	VCAGGTGBN	1e-06	-14.39	0	146	47.40%	8929.1	33.73%
M08727_3.00:IKZF1:IKZF2:IKZF3:IKZF4	AGGAAG	1e-06	-14.38	0	78	25.32%	3848.3	14.54%
M04494_3.00:ATF3:JDP2	NRTGACGTCAYS	1e-06	-14.37	0	22	7.14%	533.6	2.02%
M03501_3.00:PAX3:PAX7	TAATCGATTA	1e-06	-14.34	0	10	3.25%	100.4	0.38%
M06186_3.00:PAX3:PAX7	NTAATCGATTARYN	1e-06	-14.34	0	10	3.25%	100.8	0.38%
M12214_3.00:ESR1:ESR2:NR1D1:NR1D2:NR1H2:NR1H3:NR1H4:NR2C1:NR2C2:NR2F1:NR2F2:NR2F6:NR4A1:NR4A2:NR4A3:NR5A1:NR5A2:NR6A1:PPARA:PPARD:PPARG:RARA:RARB:RARG:RORA:RORB:RORC:RXRA:RXRB:RXRG:THRA:THRB	AWAABTAGGTCAR	1e-06	-14.34	0	10	3.25%	100.4	0.38%
M04505_3.00:ATF2:CREB5	NATGACGTCATN	1e-06	-14.27	0	18	5.84%	368.5	1.39%
M03171_3.00:ELF1:ELF2:ELF4:ELK1:ELK3:ELK4:ERF:ERG:ETS1:ETS2:ETV1:ETV2:ETV3:ETV3L:ETV4:ETV5:FEV:FLI1:GABPA	AACCGGAAATA	1e-06	-14.25	0	10	3.25%	101.3	0.38%
M12064_3.00:BORCS8-MEF2B:MEF2A:MEF2B:MEF2C:MEF2D	GVDYTAAAAATAG	1e-06	-14.22	0	56	18.18%	2416.6	9.13%
M08267_3.00:USF1:USF2	CSBSGYCACGTGACC	1e-06	-14.21	0	6	1.95%	22.2	0.08%
M09879_3.00:USF1:USF2	GGYCACGTGACCC	1e-06	-14.21	0	6	1.95%	22.2	0.08%
M02605_3.00:LIN54	NATTCAAATN	1e-06	-14.2	0	50	16.23%	2047.7	7.73%
M00795_3.00:GCM1:GCM2	NACCCGCATN	1e-06	-14.14	0	42	13.64%	1578.1	5.96%
M11226_3.00:SNAI2	CACCTGVNK	1e-06	-14.1	0	108	35.06%	6025.5	22.76%
M04376_3.00:OLIG2:OLIG3	AACAGCTGYT	1e-06	-14.07	0	24	7.79%	634.5	2.40%
M06042_3.00:BATF2	HNRCGTCATCN	1e-06	-14.06	0	38	12.34%	1356.9	5.13%
M00212_3.00:ELF1:ELF2:ELF4:ELK1:ELK3:ELK4:ERF:ERG:ETS1:ETS2:ETV1:ETV2:ETV3:ETV3L:ETV4:ETV5:FEV:FLI1:GABPA	NACCGGAAGT	1e-06	-14.04	0	20	6.49%	457.1	1.73%
M00318_3.00:ALX1:ALX3:ALX4:ARX:DRGX:EN1:EN2:ESX1:GBX1:GBX2:HESX1:ISX:LHX2:LHX3:LHX4:LHX9:MIXL1:NKX1-1:NKX1-2:OTP:PHOX2A:PHOX2B:PROP1:PRRX1:PRRX2:RAX:RAX2:SEBOX:SHOX:SHOX2:UNCX:VSX1:VSX2	TATYAATTAY	1e-06	-14.03	0	44	14.29%	1701.8	6.43%
M03991_3.00:ALX1:ALX3:ALX4:ARX:BARHL1:BARHL2:BARX1:BARX2:BSX:DLX1:DLX2:DLX3:DLX4:DLX5:DLX6:DRGX:EMX1:EMX2:EN1:EN2:ESX1:EVX1:EVX2:GBX1:GBX2:GSX1:GSX2:HMX1:HMX2:HMX3:HOXA1:HOXA2:HOXA3:HOXA4:HOXA5:HOXB1:HOXB2:HOXB3:HOXB4:HOXB5:HOXC4:HOXC5:HOXD1:HOXD3:HOXD4:ISX:MEOX1:MEOX2:MIXL1:MNX1:MSX1:MSX2:NANOG:NANOGP8:NKX1-1:NKX1-2:PDX1:PHOX2A:PHOX2B:PROP1:PRRX1:PRRX2:RAX:RAX2:SEBOX:SHOX:SHOX2:UNCX:VAX1:VAX2:VE…	TAATTAGWTAATTA	1e-06	-14	0	10	3.25%	104.7	0.40%
M00831_3.00:JUN:JUNB:JUND	WKRMGTCA	1e-06	-13.99	0	214	69.48%	14805	55.92%
M00364_3.00:ALX1:ALX3:ALX4:ARX:DRGX:EMX1:EMX2:EN1:EN2:ESX1:EVX1:EVX2:GBX1:GBX2:HESX1:HOXA2:HOXB2:ISX:LBX1:LBX2:LHX2:LHX3:LHX4:LHX9:LMX1A:LMX1B:MEOX2:MIXL1:MNX1:MSX1:MSX2:NKX1-1:NKX1-2:OTP:PHOX2A:PHOX2B:PROP1:PRRX1:PRRX2:RAX:RAX2:SEBOX:SHOX:SHOX2:UNCX:VSX1:VSX2	YTAATTRGY	1e-06	-13.97	0	32	10.39%	1036.1	3.91%
M11815_3.00:HMBOX1:HNF1A:HNF1B	AATNATTAACY	1e-06	-13.89	0	60	19.48%	2697.8	10.19%
M02179_3.00:ALX1:ALX3:ALX4:ARX:BARX1:BARX2:BSX:DLX2:DLX3:DRGX:EMX1:EMX2:EN1:EN2:ESX1:EVX1:EVX2:GBX1:GBX2:GSX1:GSX2:HESX1:HOXA2:HOXA3:HOXB2:HOXB3:HOXD3:ISL1:ISL2:ISX:LBX1:LBX2:LHX1:LHX2:LHX3:LHX4:LHX5:LHX6:LHX8:LHX9:LMX1A:LMX1B:MEOX1:MIXL1:MNX1:MSX1:MSX2:NKX1-1:NKX1-2:NOBOX:NOTO:OTP:PDX1:PHOX2A:PHOX2B:PROP1:PRRX1:PRRX2:RAX:RAX2:SEBOX:SHOX:SHOX2:UNCX:VAX1:VAX2:VSX1:VSX2:ZFHX2:ZFHX3	NATTAATTAR	1e-05	-13.77	0	28	9.09%	840.9	3.18%
M01322_3.00:HOXA3:HOXA4:HOXA5:HOXA6:HOXA7:HOXB3:HOXB4:HOXB5:HOXB6:HOXB7:HOXB8:HOXC4:HOXC5:HOXC6:HOXC8:HOXD3:HOXD4:HOXD8:PDX1	ATTAATTA	1e-05	-13.76	0	42	13.64%	1602.2	6.05%
M02946_3.00:POU2F2	TGAATATTCA	1e-05	-13.74	0	12	3.90%	165.5	0.63%
M10373_3.00:BORCS8-MEF2B:MEF2A:MEF2B:MEF2C:MEF2D	DKCTATTTTTAG	1e-05	-13.74	0	52	16.88%	2204.9	8.33%
M04887_3.00:DMRT1:DMRT2:DMRT3:DMRTA2:DMRTB1:DMRTC2	AWTYGHTACATT	1e-05	-13.73	0	24	7.79%	647.8	2.45%
M10740_3.00:ESR1:ESR2:NR1D1:NR1D2:NR1H2:NR1H3:NR1H4:NR2C1:NR2C2:NR2F1:NR2F2:NR2F6:NR4A1:NR4A2:NR4A3:NR5A1:NR5A2:NR6A1:PPARA:PPARD:PPARG:RARA:RARB:RARG:RORA:RORB:RORC:RXRA:RXRB:RXRG:THRA:THRB	AAYTAGGTCA	1e-05	-13.73	0	22	7.14%	555.1	2.10%
M06225_3.00:JUN:JUNB:JUND	ATGACTCA	1e-05	-13.7	0	44	14.29%	1723.3	6.51%
M08360_3.00:CTCF	CCACYAGRGGGCRSY	1e-05	-13.68	0	12	3.90%	166.5	0.63%
M03264_3.00:FOXC1:FOXC2:FOXD1:FOXD2:FOXD3:FOXD4:FOXD4L1:FOXD4L3:FOXD4L4:FOXD4L5:FOXD4L6:FOXE1:FOXF1:FOXF2:FOXG1:FOXI1:FOXI3:FOXK2:FOXL1:FOXL2:FOXP4:FOXS1	TGTTTAT	1e-05	-13.64	0	94	30.52%	5053.8	19.09%
M02105_3.00:GCM1:GCM2	HACCCGYATN	1e-05	-13.62	0	46	14.94%	1847.8	6.98%
M03496_3.00:PAX3:PAX7	TAATCGATTA	1e-05	-13.61	0	16	5.19%	307.3	1.16%
M09925_3.00:FOS:FOSB:FOSL1:FOSL2	VTGAGTCAY	1e-05	-13.59	0	32	10.39%	1055.1	3.99%
M04486_3.00:JUN:JUNB:JUND	SGTGACGTCATS	1e-05	-13.58	0	18	5.84%	387.1	1.46%
M08247_3.00:USF2	GGTCACGTGRCCV	1e-05	-13.57	0	6	1.95%	25.1	0.09%
M08269_3.00:USF1:USF2	SGGTCACGTGRCCV	1e-05	-13.57	0	6	1.95%	25.1	0.09%
M04418_3.00:TCF12:TCF3:TCF4	GCAGGTGB	1e-05	-13.55	0	92	29.87%	4919.4	18.58%
M02936_3.00:GLI1:GLI2:GLI3	GTGGGTGGTC	1e-05	-13.52	0	24	7.79%	655.9	2.48%
M04198_3.00:TBX15:TBX18:TBX20:TBX22	RAGGTGTGAA	1e-05	-13.5	0	48	15.58%	1976.3	7.46%
M00315_3.00:ALX1:ALX3:ALX4:ARX:BARHL1:BARHL2:BARX1:BARX2:BSX:DLX1:DLX2:DLX3:DLX4:DLX5:DLX6:DRGX:EMX1:EMX2:EN1:EN2:ESX1:EVX1:EVX2:GBX1:GBX2:GSX1:GSX2:HESX1:HOXA2:HOXA3:HOXB2:HOXB3:HOXD3:ISX:LBX1:LBX2:LHX1:LHX2:LHX3:LHX4:LHX5:LHX6:LHX8:LHX9:LMX1A:LMX1B:MEOX1:MIXL1:MNX1:MSX1:MSX2:NKX1-1:NKX1-2:NOBOX:NOTO:OTP:PDX1:PHOX2A:PHOX2B:PROP1:PRRX1:PRRX2:RAX:RAX2:SEBOX:SHOX:SHOX2:UNCX:VAX1:VAX2:VSX1:VSX2:ZFHX…	NAYTAATTAKM	1e-05	-13.49	0	32	10.39%	1060	4.00%
M03503_3.00:POU2F2	HATGMATATKCAWA	1e-05	-13.48	0	18	5.84%	390.8	1.48%
M02323_3.00:POU2F2:POU5F1B	CTAATTAA	1e-05	-13.46	0	48	15.58%	1979.8	7.48%
M08144_3.00:ZNF860	AGCAGGGAGCAGVRG	1e-05	-13.39	0	12	3.90%	171.1	0.65%
M11100_3.00:ATF3:JDP2	GGCGCSSSSNGRTSACGTGA	1e-05	-13.38	0	6	1.95%	26.9	0.10%
M00562_3.00:BARHL1:BARHL2:BSX:EMX1:EMX2:GBX1:GBX2:HMX1:HMX2:HMX3:HOXA4:HOXA5:HOXB4:HOXB5:HOXC4:HOXC5:HOXD4:LBX2:MEOX1:MEOX2:MNX1:MSX1:MSX2:NANOG:NANOGP8:PDX1:TLX1:TLX2:TLX3:VAX1:VAX2:VENTX	TTAATTGNYN	1e-05	-13.36	0	92	29.87%	4940.8	18.66%
M04436_3.00:XBP1	SRTGACGTCAYS	1e-05	-13.34	0	18	5.84%	394	1.49%
M04454_3.00:ATF2	NRTGACGTCAYN	1e-05	-13.3	0	28	9.09%	861.7	3.25%
M04496_3.00:ATF3:JDP2	NRTGACRTCAYN	1e-05	-13.3	0	24	7.79%	665	2.51%
M04495_3.00:ATF3:JDP2	NRTGASTCAYN	1e-05	-13.28	0	32	10.39%	1071.1	4.05%
M12498_3.00:EOMES:TBX2:TBX20:TBX3:TBX4:TBX5	TVAGGTGTTA	1e-05	-13.26	0	62	20.13%	2882	10.89%
M05248_3.00:NKX2-1:NKX2-2:NKX2-3:NKX2-4:NKX2-5:NKX2-6:NKX2-8	CTCAACGAC	1e-05	-13.22	0	20	6.49%	483.9	1.83%
M11257_3.00:MZF1	KGGBGAGGGGGAA	1e-05	-13.17	0	28	9.09%	867.1	3.28%
M00893_3.00:ESR1:ESR2:HNF4A:HNF4G:NR1D1:NR1D2:NR1H2:NR1H3:NR1H4:NR2C1:NR2C2:NR2F1:NR2F2:NR2F6:NR4A1:NR4A2:NR4A3:NR5A2:NR6A1:PPARA:PPARD:PPARG:RARA:RARB:RARG:RORA:RORB:RORC:RXRA:RXRB:RXRG:THRA:THRB	RRGGTCAN	1e-05	-13.15	0.0001	140	45.45%	8623.8	32.57%
M05944_3.00:SKOR2	VTTAATTACAGTTN	1e-05	-13.11	0.0001	12	3.90%	176.4	0.67%
M10722_3.00:BORCS8-MEF2B:MEF2A:MEF2B:MEF2C:MEF2D	CYAAAAATAG	1e-05	-13.09	0.0001	62	20.13%	2896.7	10.94%
M11907_3.00:BARX1:BARX2:BSX:EMX1:EMX2:EN1:EN2:EVX1:EVX2:GBX1:GBX2:GSX1:GSX2:HESX1:HMX1:HMX2:HMX3:HOXA1:HOXA2:HOXA3:HOXA4:HOXA5:HOXA6:HOXA7:HOXB1:HOXB2:HOXB3:HOXB4:HOXB5:HOXB6:HOXB7:HOXB8:HOXC4:HOXC5:HOXC6:HOXD1:HOXD3:HOXD4:HOXD8:ISX:MEOX1:MEOX2:MNX1:NKX1-1:NKX1-2:NOTO:OTP:PDX1:TLX1:TLX3:VAX1:VAX2:VENTX	NNNNNRATTAMTNNNN	1e-05	-13.06	0.0001	130	42.21%	7844.1	29.63%
M09713_3.00:MEF2A:MEF2C	CTAWAAATAG	1e-05	-13.04	0.0001	64	20.78%	3032.6	11.45%
M11622_3.00:ELF1:ELF2:ELF4:ELK1:ELK3:ELK4:ERF:ERG:ETS1:ETS2:ETV1:ETV2:ETV3:ETV3L:ETV4:ETV5:FEV:FLI1:GABPA	RCAGGAAGTGVKTGS	1e-05	-13.04	0.0001	14	4.55%	246.3	0.93%
M09249_3.00:ZNF729	GDDRGGGAGGGAGGGRAGGAGGGAGGGRGRV	1e-05	-13.04	0.0001	8	2.60%	66.1	0.25%
M03238_3.00:FOXC1:FOXC2:FOXD1:FOXD2:FOXD3:FOXD4:FOXD4L1:FOXD4L3:FOXD4L4:FOXD4L5:FOXD4L6:FOXE1:FOXE3:FOXF1:FOXF2:FOXG1:FOXI1:FOXI3:FOXL1:FOXL2:FOXS1	TGTTTAY	1e-05	-13.02	0.0001	82	26.62%	4266.2	16.11%
M06389_3.00:FERD3L	GTRACAGCTG	1e-05	-12.99	0.0001	36	11.69%	1307.1	4.94%
M10711_3.00:PAX3:PAX7	TAATCAATTA	1e-05	-12.94	0.0001	10	3.25%	118.7	0.45%
M08494_3.00:ZNF426	GGCGACAG	1e-05	-12.9	0.0001	120	38.96%	7088	26.77%
M10376_3.00:BORCS8-MEF2B:MEF2A:MEF2B:MEF2C:MEF2D	KTKCTATTTTTAGMH	1e-05	-12.87	0.0001	48	15.58%	2023.5	7.64%
M04912_3.00:ELF1:ELF2:ELF4:ELK1:ELK3:ELK4:ERF:ERG:ETS1:ETS2:ETV1:ETV2:ETV3:ETV3L:ETV4:ETV5:FEV:FLI1:GABPA	NRCCGGAWGYN	1e-05	-12.87	0.0001	30	9.74%	986	3.72%
M04503_3.00:ATF2:CREB5	NRTGACGTCAYN	1e-05	-12.86	0.0001	28	9.09%	882.7	3.33%
M01324_3.00:ISL1:ISL2:NOTO:SHOX:SHOX2:VSX1	TCTTAATTGMH	1e-05	-12.85	0.0001	52	16.88%	2273.3	8.59%
M03794_3.00:ARID3A:ARID3B:ARID3C	HRATTAATYD	1e-05	-12.85	0.0001	50	16.23%	2148.3	8.11%
M09961_3.00:JUN:JUNB:JUND	VTGAGTCAY	1e-05	-12.85	0.0001	32	10.39%	1094.7	4.13%
M10948_3.00:HES1:HES4	GGCKCGTGSC	1e-05	-12.83	0.0001	36	11.69%	1316.7	4.97%
M08741_3.00:ZBTB24	GGGTCCTGGG	1e-05	-12.81	0.0001	28	9.09%	884	3.34%
M00890_3.00:ESR1:ESR2:NR1D1:NR1D2:NR1H2:NR1H3:NR1H4:NR2C1:NR2C2:NR2F1:NR2F2:NR2F6:NR4A1:NR4A2:NR4A3:NR5A1:NR5A2:NR6A1:PPARA:PPARD:PPARG:RARA:RARB:RARG:RORA:RORB:RORC:RXRA:RXRB:RXRG:THRA:THRB	NKRGGTCA	1e-05	-12.79	0.0001	136	44.16%	8356.5	31.56%
M10200_3.00:EHF:ELF1:ELF2:ELF3:ELF4:ELF5:ETV6:ETV7	RCAGGAARK	1e-05	-12.76	0.0001	96	31.17%	5301.6	20.02%
M11581_3.00:E2F1:E2F2:E2F3:E2F4:E2F5:E2F6	GGCGSGAAAD	1e-05	-12.75	0.0001	20	6.49%	499.3	1.89%
M03110_3.00:ZNF524	GKCAMGGGTTCGAG	1e-05	-12.73	0.0001	8	2.60%	69.9	0.26%
M06404_3.00:ARNT:ARNT2	GTCACGTAC	1e-05	-12.73	0.0001	10	3.25%	122	0.46%
M08411_3.00:ELF1:ELF2:ELF4:ELK1:ELK3:ELK4:ERF:ERG:ETS1:ETS2:ETV1:ETV2:ETV3:ETV3L:ETV4:ETV5:FEV:FLI1:GABPA	VRCCGGAAGTG	1e-05	-12.73	0.0001	12	3.90%	183.2	0.69%
M00824_3.00:TCF12:TCF3:TCF4	NVCAGGTGB	1e-05	-12.68	0.0001	110	35.71%	6354.5	24.00%
M04497_3.00:CREB3L2:CREB3L4	GGTGACGTCAYC	1e-05	-12.67	0.0001	12	3.90%	184.7	0.70%
M04072_3.00:ALX1:ALX3:ALX4:ARX:BARX1:BARX2:BSX:DLX2:DLX3:DRGX:EMX1:EMX2:EN1:EN2:ESX1:EVX1:EVX2:GBX1:GBX2:GSX1:GSX2:HESX1:HOXA2:HOXA3:HOXB2:HOXB3:HOXD3:ISX:LBX1:LBX2:LHX1:LHX2:LHX3:LHX4:LHX5:LHX6:LHX8:LHX9:LMX1A:LMX1B:MEOX1:MIXL1:MNX1:MSX1:MSX2:NKX1-1:NKX1-2:NOBOX:NOTO:OTP:PDX1:PHOX2A:PHOX2B:PROP1:PRRX1:PRRX2:RAX:RAX2:SEBOX:SHOX:SHOX2:UNCX:VAX1:VAX2:VSX1:VSX2:ZFHX2	YAATTAACCAATTA	1e-05	-12.66	0.0001	10	3.25%	122.7	0.46%
M05560_3.00:POU6F1	TAATGAGVBGTAATGA	1e-05	-12.65	0.0001	6	1.95%	30.8	0.12%
M11089_3.00:JUN:JUNB:JUND	TGACGTCAY	1e-05	-12.65	0.0001	28	9.09%	892.8	3.37%
M06449_3.00:YY1	GAAGCCATAACGGC	1e-05	-12.59	0.0001	10	3.25%	123.3	0.47%
M01564_3.00:ELF1:ELF2:ELF4:ELK1:ELK3:ELK4:ERF:ERG:ETS1:ETS2:ETV1:ETV2:ETV3:ETV3L:ETV4:ETV5:FEV:FLI1:GABPA	ACCGGAAGT	1e-05	-12.58	0.0001	20	6.49%	505.4	1.91%
M04468_3.00:ATF1:CREB1:CREM	NRTGACGTCAYN	1e-05	-12.56	0.0001	24	7.79%	694.2	2.62%
M06224_3.00:JUN:JUNB:JUND	GATKACGTCAT	1e-05	-12.56	0.0001	24	7.79%	694.2	2.62%
M04569_3.00:MAF:MAFA:MAFB:MAFG:MAFK	MGTCAGCANWTTT	1e-05	-12.54	0.0001	8	2.60%	71.5	0.27%
M05655_3.00:POU2F2	TTGCATATKCAW	1e-05	-12.51	0.0001	18	5.84%	419.2	1.58%
M11824_3.00:ALX1:ALX3:ALX4:ARX:BARHL1:BARHL2:BARX1:BARX2:BSX:DLX1:DLX2:DLX3:DLX4:DLX5:DLX6:DRGX:EMX1:EMX2:EN1:EN2:ESX1:EVX1:EVX2:GBX1:GBX2:GSX1:GSX2:HMX1:HMX2:HMX3:HOXA1:HOXA2:HOXA3:HOXA4:HOXA5:HOXA6:HOXA7:HOXB1:HOXB2:HOXB3:HOXB4:HOXB5:HOXB6:HOXB7:HOXB8:HOXC4:HOXC5:HOXC6:HOXD1:HOXD3:HOXD4:HOXD8:ISX:LHX3:LHX4:MEOX1:MEOX2:MIXL1:MNX1:MSX1:MSX2:NANOG:NANOGP8:NKX1-1:NKX1-2:NOBOX:NOTO:OTP:PDX1:PHOX2A:P…	VVCTAATTAC	1e-05	-12.5	0.0001	16	5.19%	336.7	1.27%
M00166_3.00:TFAP2A:TFAP2B:TFAP2C:TFAP2D:TFAP2E	SCCTVRGGCD	1e-05	-12.5	0.0001	86	27.92%	4608.4	17.41%
M10656_3.00:EHF:ELF1:ELF2:ELF3:ELF4:ELF5:ETV6:ETV7:FEV	AVCAGGAAGT	1e-05	-12.5	0.0001	46	14.94%	1928.4	7.28%
M09856_3.00:USF1:USF2	GGTCACGTGRCC	1e-05	-12.48	0.0001	6	1.95%	31.7	0.12%
M03193_3.00:EHF:ELF1:ELF2:ELF3:ELF4:ELF5:ETV6:ETV7:SPI1:SPIC	ACCCGGAAGTD	1e-05	-12.47	0.0001	24	7.79%	698.3	2.64%
M04221_3.00:ATF2	ATGACGTCAC	1e-05	-12.39	0.0001	18	5.84%	423	1.60%
M06251_3.00:ELF1:ELF2:ELF4:ELK1:ELK3:ELK4:ERF:ERG:ETS1:ETS2:ETV1:ETV2:ETV3:ETV3L:ETV4:ETV5:FEV:FLI1:GABPA	ACCGGAARTR	1e-05	-12.38	0.0001	20	6.49%	512.6	1.94%
M06252_3.00:ELF1:ELF2:ELF4:ELK1:ELK3:ELK4:ERF:ERG:ETS1:ETS2:ETV1:ETV2:ETV3:ETV3L:ETV4:ETV5:FEV:FLI1:GABPA	ACCGGAAGTDN	1e-05	-12.38	0.0001	20	6.49%	512.4	1.94%
M05419_3.00:ALX1:ALX3:ALX4:ARX:DRGX:EN1:EN2:ESX1:HESX1:ISX:LHX2:LHX3:LHX4:LHX6:LHX8:LHX9:LMX1A:LMX1B:MIXL1:NOBOX:OTP:PHOX2A:PHOX2B:PROP1:PRRX1:PRRX2:RAX:RAX2:SEBOX:SHOX:SHOX2:UNCX:VSX1:VSX2:ZFHX2	TTAATTAM	1e-05	-12.38	0.0001	32	10.39%	1120.8	4.23%
M05484_3.00:HOXA10:HOXA11:HOXC10:HOXC11:HOXC12:HOXD10:HOXD11:HOXD12:MEOX2	DTTTACGACN	1e-05	-12.35	0.0001	14	4.55%	262.8	0.99%
M02109_3.00:GCM1:GCM2	ACCCGCAT	1e-05	-12.31	0.0001	66	21.43%	3236.8	12.23%
M04953_3.00:ELF1:ELF2:ELF4:SPDEF	NAMCAGGATGTD	1e-05	-12.29	0.0001	16	5.19%	342.1	1.29%
M06180_3.00:ELF1:ELF2:ELF4:ELK1:ELK3:ELK4:ERF:ERG:ETS1:ETS2:ETV1:ETV2:ETV3:ETV3L:ETV4:ETV5:FEV:FLI1:GABPA	RCCGGAAG	1e-05	-12.28	0.0001	68	22.08%	3374.4	12.75%
M09417_3.00:ZNF264	RGTTAGYGCCCT	1e-05	-12.26	0.0001	14	4.55%	264.6	1.00%
M00595_3.00:PAX2:PAX4:PAX6	CTAATTAA	1e-05	-12.23	0.0001	40	12.99%	1586.4	5.99%
M09346_3.00:ZNF814	YTAGGGAGGGAA	1e-05	-12.22	0.0001	16	5.19%	344.7	1.30%
M04947_3.00:EHF:ELF1:ELF2:ELF3:ELF4:ELF5:ELK1:ELK3:ELK4:ERF:ERG:ETS1:ETS2:ETV1:ETV2:ETV3:ETV3L:ETV4:ETV5:ETV6:ETV7:FEV:FLI1:GABPA:SPDEF	RABSCGGAAGTG	1e-05	-12.21	0.0001	20	6.49%	518.4	1.96%
M06035_3.00:ZFTA	SCCCYCAGGGGCCACA	1e-05	-12.16	0.0001	8	2.60%	75.9	0.29%
M00331_3.00:PBX1:PBX2:PBX3:PBX4	NCTAATTAATN	1e-05	-12.16	0.0001	30	9.74%	1023.2	3.86%
M09123_3.00:ZNF606	SCGWGGAGACCGCGGCS	1e-05	-12.15	0.0001	4	1.30%	7.1	0.03%
M12057_3.00:BORCS8-MEF2B:MEF2A:MEF2B:MEF2C:MEF2D	AGGGTTATTTTTAGAS	1e-05	-12.15	0.0001	4	1.30%	7.2	0.03%
M01891_3.00:FOS:FOSB:FOSL1:FOSL2	RCGTCATC	1e-05	-12.12	0.0001	34	11.04%	1246	4.71%
M08325_3.00:CTCF	RCCACYAGRKGGC	1e-05	-12.11	0.0001	12	3.90%	195.3	0.74%
M03312_3.00:ALX1:ALX3:ALX4:ARX:DRGX:EN1:EN2:ESX1:ISX:LHX2:LHX3:LHX4:LHX6:LHX8:LHX9:LMX1A:LMX1B:MIXL1:OTP:PHOX2A:PHOX2B:PROP1:PRRX1:PRRX2:RAX:RAX2:SEBOX:SHOX:SHOX2:UNCX:VSX1:VSX2:ZFHX2	RCTAATTAGY	1e-05	-12.11	0.0001	22	7.14%	616.6	2.33%
M10659_3.00:ELF1:ELF2:ELF4:ELK1:ELK3:ELK4:ERF:ERG:ETS1:ETS2:ETV1:ETV2:ETV3:ETV3L:ETV4:ETV5:FEV:FLI1:GABPA	ACAGGAAGTG	1e-05	-12.09	0.0001	30	9.74%	1027.2	3.88%
M04282_3.00:MITF:TFEC	BGTCACGTGBK	1e-05	-12.07	0.0001	8	2.60%	76.3	0.29%
M04483_3.00:MAF:MAFA:MAFB:NRL	CGTCAGCANWTTT	1e-05	-12.07	0.0001	8	2.60%	76.5	0.29%
M11363_3.00:ZNF148	TGGGGGAGGR	1e-05	-12.05	0.0001	58	18.83%	2728.3	10.31%
M08605_3.00:CTCF	CCACYAGRGGGCRCY	1e-05	-12.01	0.0001	12	3.90%	197.4	0.75%
M08407_3.00:EHF:ELF1:ELF2:ELF3:ELF4:ELF5:ELK1:ELK3:ELK4:ERF:ERG:ETS1:ETS2:ETV1:ETV2:ETV3:ETV3L:ETV4:ETV5:ETV6:ETV7:FEV:FLI1:GABPA:SPDEF	ACCCGGAAGTG	1e-05	-11.98	0.0001	8	2.60%	77.1	0.29%
M06446_3.00:SNAI2	ACAGGTG	1e-05	-11.98	0.0001	86	27.92%	4669.5	17.64%
M08703_3.00:FOS:FOSB:FOSL1:FOSL2	ATGASTCA	1e-05	-11.97	0.0001	32	10.39%	1143.2	4.32%
M10378_3.00:BORCS8-MEF2B:MEF2A:MEF2B:MEF2C:MEF2D	WKCTATTTTTAGMW	1e-05	-11.97	0.0001	52	16.88%	2346.7	8.86%
M01903_3.00:ATF1:CREB1:CREM	TTACGTCATM	1e-05	-11.91	0.0001	28	9.09%	929.4	3.51%
M08596_3.00:NFXL1	TCCTCCTCCYYCTCC	1e-05	-11.9	0.0001	18	5.84%	439.5	1.66%
M04498_3.00:CREB3L2:CREB3L4	YGCCACGTCACC	1e-05	-11.86	0.0001	6	1.95%	35.1	0.13%
M04769_3.00:GLIS1	GCTYCGTGGGGGGTM	1e-05	-11.86	0.0001	6	1.95%	35.6	0.13%
M10038_3.00:ZNF768	GAGGCTCAGAGAGGTTAAGT	1e-05	-11.86	0.0001	6	1.95%	35.7	0.13%
M11538_3.00:RBPJ	ABTGTGGGAAMCK	1e-05	-11.86	0.0001	14	4.55%	274.7	1.04%
M04341_3.00:TCF12:TCF3:TCF4	VCACCTGC	1e-05	-11.85	0.0002	116	37.66%	6926.2	26.16%
M03499_3.00:PAX4	CTAATTAG	1e-05	-11.84	0.0002	48	15.58%	2104	7.95%
M02230_3.00:ALX1:ALX3:ALX4:ARX:BARHL1:BARHL2:BSX:DRGX:ESX1:EVX1:EVX2:GBX1:GBX2:HESX1:LBX1:LBX2:MEOX2:MIXL1:MSX1:MSX2:PHOX2A:PHOX2B:PROP1:PRRX1:PRRX2:RAX:RAX2:SHOX:SHOX2:TLX1:TLX3:UNCX:VSX1:VSX2	YTAATTAG	1e-05	-11.82	0.0002	12	3.90%	201.3	0.76%
M03526_3.00:POU2F2	TWTGMATATTCATA	1e-05	-11.81	0.0002	8	2.60%	79	0.30%
M00475_3.00:DBX2:NKX3-1:NKX3-2	YTAAGTGSNN	1e-05	-11.74	0.0002	112	36.36%	6633.3	25.05%
M00196_3.00:HIC2	VGTTGGCAY	1e-05	-11.74	0.0002	138	44.81%	8673.8	32.76%
M08773_3.00:ZBTB7A	CCGGAAGTG	1e-05	-11.73	0.0002	20	6.49%	536.6	2.03%
M08268_3.00:USF1:USF2	GYCACGTGACC	1e-05	-11.72	0.0002	6	1.95%	36.3	0.14%
M06383_3.00:BHLHE22:BHLHE23	GACAGATGT	1e-05	-11.69	0.0002	30	9.74%	1049.3	3.96%
M00538_3.00:SIX3:SIX6	NYGATAC	1e-05	-11.68	0.0002	246	79.87%	18189	68.70%
M10982_3.00:TCF12:TCF3:TCF4	VCAGGTG	1e-05	-11.67	0.0002	122	39.61%	7416.8	28.01%
M08729_3.00:ZBTB11	CCGGAAGTG	1e-05	-11.63	0.0002	12	3.90%	205.7	0.78%
M10676_3.00:GATA1:GATA2:GATA3:GATA4:GATA5:GATA6	NNNNNBAGATAWYATCTVHN	1e-05	-11.63	0.0002	12	3.90%	205.1	0.77%
M01574_3.00:EHF:ELF1:ELF2:ELF3:ELF4:ELF5:ELK1:ELK3:ELK4:ERF:ERG:ETS1:ETS2:ETV1:ETV2:ETV3:ETV3L:ETV4:ETV5:ETV6:ETV7:FEV:FLI1:GABPA:SPDEF	DNCCGGAAGT	1e-05	-11.6	0.0002	76	24.68%	4000.3	15.11%
M10156_3.00:E2F7:E2F8	GRGGCGGGAAADG	1e-05	-11.6	0.0002	22	7.14%	637.2	2.41%
M10163_3.00:E2F7:E2F8	GRGGCGGGAAADG	1e-05	-11.6	0.0002	22	7.14%	637.2	2.41%
M10693_3.00:ALX1:ALX3:ALX4:ARX:DRGX:EMX1:EMX2:EN1:EN2:ESX1:GBX1:GBX2:GSX1:GSX2:HESX1:HOXA2:HOXA3:HOXB2:HOXB3:HOXD3:ISX:LHX1:LHX2:LHX3:LHX4:LHX5:LHX6:LHX8:LHX9:LMX1A:LMX1B:MIXL1:MNX1:MSX1:MSX2:NOBOX:NOTO:OTP:PDX1:PHOX2A:PHOX2B:PROP1:PRRX1:PRRX2:RAX:RAX2:SEBOX:SHOX:SHOX2:UNCX:VAX1:VAX2:VSX1:VSX2:ZFHX2	YTAATTAVHT	1e-05	-11.6	0.0002	32	10.39%	1165.9	4.40%
M10119_3.00:EGR1:EGR2:EGR3:EGR4	GKGCGKGGGCGGGG	1e-05	-11.57	0.0002	16	5.19%	363.5	1.37%
M06709_3.00:IRX2:IRX4:IRX5	TGTTWTTH	1e-05	-11.57	0.0002	208	67.53%	14653	55.35%
M00223_3.00:GCM1:GCM2	RCCCGCATN	1e-05	-11.56	0.0002	66	21.43%	3311.8	12.51%
M00449_3.00:HOXA13:HOXB13:HOXC13:HOXD13	WTTTAYDRS	0.0001	-11.5	0.0002	160	51.95%	10509	39.69%
M10176_3.00:EHF:ELF1:ELF2:ELF3:ELF4:ELF5:ETV6:ETV7:FEV	RAACCAGGAAGTRGS	0.0001	-11.46	0.0002	10	3.25%	141.2	0.53%
M10194_3.00:EHF:ELF1:ELF2:ELF3:ELF4:ELF5:ETV6:ETV7:FEV	RAACCAGGAAGTRGS	0.0001	-11.46	0.0002	10	3.25%	141.2	0.53%
M08283_3.00:ATF3:JDP2	TCACGTSACC	0.0001	-11.46	0.0002	24	7.79%	743.5	2.81%
M07275_3.00:E2F1:E2F2:E2F3:E2F4:E2F5:E2F6	ATWWTGGCGCCAAAA	0.0001	-11.39	0.0002	4	1.30%	9.6	0.04%
M09197_3.00:ZNF696	ARGATGCAGAGGGACAS	0.0001	-11.39	0.0002	4	1.30%	9.5	0.04%
M03425_3.00:HOXA10:HOXA4:HOXA5:HOXA6:HOXA7:HOXA9:HOXB4:HOXB5:HOXB6:HOXB7:HOXB8:HOXB9:HOXC10:HOXC4:HOXC5:HOXC6:HOXC8:HOXC9:HOXD10:HOXD4:HOXD8:HOXD9:MNX1:PDX1	GYTAATTAKY	0.0001	-11.39	0.0002	124	40.26%	7615.2	28.76%
M05552_3.00:NKX2-1:NKX2-2:NKX2-3:NKX2-4:NKX2-5:NKX2-6:NKX2-8	CTCAACGAS	0.0001	-11.38	0.0002	16	5.19%	369.5	1.40%
M00832_3.00:CEBPA:CEBPB:CEBPE	RTKDYGCAAY	0.0001	-11.35	0.0002	102	33.12%	5928.9	22.39%
M03225_3.00:FOXO1:FOXO3:FOXO4:FOXO6:FOXP4	GTGTGGGGAAA	0.0001	-11.32	0.0002	14	4.55%	289	1.09%
M03380_3.00:HOXA13:HOXB13:HOXC13:HOXD13	DTTTTACGAGS	0.0001	-11.29	0.0002	10	3.25%	144.2	0.54%
M09948_3.00:ATF3:JDP2	VTGACTCAB	0.0001	-11.28	0.0002	36	11.69%	1415.5	5.35%
M01379_3.00:ESR1:ESR2:ESRRA:ESRRB:ESRRG:NR1H2:NR1H3:NR2C2:NR2F1:NR2F2:NR2F6:RARA:RARB:RARG:RORA:RORB:RORC	NNRGGTCAH	0.0001	-11.24	0.0003	122	39.61%	7480.5	28.25%
M05114_3.00:ISL1:ISL2:NOTO:SHOX:SHOX2:VSX1	GCACTTAV	0.0001	-11.23	0.0003	108	35.06%	6399.9	24.17%
M12300_3.00:ESR1:ESR2:NR1D1:NR1D2:NR1H2:NR1H3:NR1H4:NR2C1:NR2C2:NR2F1:NR2F2:NR2F6:NR4A1:NR6A1:PPARA:PPARD:PPARG:RARA:RARB:RARG:RORA:RORB:RORC:RXRA:RXRB:RXRG:THRA	AAAGGTCAS	0.0001	-11.19	0.0003	84	27.27%	4620.9	17.45%
M03500_3.00:PAX4	CTAATTAG	0.0001	-11.18	0.0003	34	11.04%	1305.2	4.93%
M08280_3.00:ATF3:JDP2	GYCACGTGACC	0.0001	-11.18	0.0003	6	1.95%	40.8	0.15%
M03440_3.00:CRX:DMBX1:DPRX:GSC:GSC2:OTX1:OTX2:PITX1:PITX2:PITX3:TPRX1	NYTAATCCBH	0.0001	-11.15	0.0003	88	28.57%	4916.8	18.57%
M01805_3.00:TCF12:TCF3:TCF4	NNVCACCTGB	0.0001	-11.14	0.0003	120	38.96%	7339.3	27.72%
M03511_3.00:POU2F3	ATGAATATKCAW	0.0001	-11.13	0.0003	18	5.84%	467	1.76%
M06119_3.00:ZNF532	DKGGCACMH	0.0001	-11.12	0.0003	148	48.05%	9581.6	36.19%
M09355_3.00:ZNF845	NAGGARDGAGRAGCAGAGGAARRRGNVN	0.0001	-11.08	0.0003	8	2.60%	88.9	0.34%
M10350_3.00:POU3F1	CTCATGMATATTCAWD	0.0001	-11.08	0.0003	8	2.60%	88.8	0.34%
M04962_3.00:EHF:ELF1:ELF2:ELF3:ELF4:ELF5:ETV6:ETV7:SPI1:SPIC	GACCCGGAAGTD	0.0001	-11.07	0.0003	10	3.25%	148.7	0.56%
M00789_3.00:EOMES:TBR1	NAGGTGTKAN	0.0001	-11.06	0.0003	48	15.58%	2168.9	8.19%
M04707_3.00:ZNF75A:ZNF75D	KTGTGGGAAAAGCK	0.0001	-11.05	0.0003	6	1.95%	41.5	0.16%
M08295_3.00:JUN:JUNB:JUND	RRRRRRATGASTCAT	0.0001	-11.01	0.0003	10	3.25%	149.5	0.56%
M04976_3.00:ELF1:ELF2:ELF4:ELK1:ELK3:ELK4:ERF:ERG:ETS1:ETS2:ETV1:ETV2:ETV3:ETV3L:ETV4:ETV5:FEV:FLI1:GABPA	VACAGGAARTG	0.0001	-10.96	0.0003	28	9.09%	980.1	3.70%
M09484_3.00:EGR1:EGR2:EGR3:EGR4	GHGGGGGCG	0.0001	-10.96	0.0003	54	17.53%	2566.8	9.69%
M06267_3.00:ESR1:ESR2:NR1D1:NR1D2:NR1H2:NR1H3:NR1H4:NR2C1:NR2C2:NR2F1:NR2F2:NR2F6:NR4A1:NR4A2:NR4A3:NR5A1:NR5A2:NR6A1:PPARA:PPARD:PPARG:RARA:RARB:RARG:RORA:RORB:RORC:RXRA:RXRB:RXRG:THRB	NWAWNTAGGTCA	0.0001	-10.94	0.0003	24	7.79%	768.4	2.90%
M08479_3.00:KDM5B	GGCGGCRGCGGCGGC	0.0001	-10.93	0.0003	18	5.84%	473.5	1.79%
M02875_3.00:PAX6	TTCACGCWTGANTT	0.0001	-10.92	0.0003	6	1.95%	42.5	0.16%
M08977_3.00:BACH1:BACH2	GTCACGTG	0.0001	-10.9	0.0003	32	10.39%	1208.2	4.56%
M04445_3.00:CREB3:CREB3L1	SRTGACGTCAYC	0.0001	-10.88	0.0003	12	3.90%	222.3	0.84%
M08415_3.00:ELF1:ELF2:ELF4:ELK1:ELK3:ELK4:ERF:ERG:ETS1:ETS2:ETV1:ETV2:ETV3:ETV3L:ETV4:ETV5:FEV:FLI1:GABPA	CCGGAAGTGG	0.0001	-10.84	0.0004	12	3.90%	223.2	0.84%
M10088_3.00:KLF1:KLF12:KLF2:KLF3:KLF4:KLF5:KLF6:KLF7:KLF8	GGGGCWGGGYGGGGC	0.0001	-10.8	0.0004	18	5.84%	478.3	1.81%
M09991_3.00:KLF1:KLF12:KLF2:KLF3:KLF4:KLF5:KLF6:KLF7:KLF8	WGGGTGKGGCWGGG	0.0001	-10.8	0.0004	24	7.79%	775.7	2.93%
M00392_3.00:PAX2:PAX6	KMTAATTAATN	0.0001	-10.79	0.0004	28	9.09%	990.6	3.74%
M10192_3.00:ELF1:ELF2:ELF4:ELK1:ELK3:ELK4:ERF:ERG:ETS1:ETS2:ETV1:ETV2:ETV3:ETV3L:ETV4:ETV5:FEV:FLI1:GABPA	GGMRCCGGAAGTGV	0.0001	-10.78	0.0004	8	2.60%	92.6	0.35%
M09918_3.00:FOS:FOSB:FOSL1:FOSL2	RTGAGTCAB	0.0001	-10.75	0.0004	40	12.99%	1693.4	6.40%
M08175_3.00:ZNF468	DGGGAGGGGGYG	0.0001	-10.74	0.0004	24	7.79%	778.3	2.94%
M02226_3.00:CRX:DMBX1:DPRX:GSC:GSC2:OTX1:OTX2:PITX1:PITX2:PITX3:TPRX1	VTTAATCCYH	0.0001	-10.71	0.0004	78	25.32%	4247.5	16.04%
M10168_3.00:EBF1:EBF2:EBF3:EBF4	STCCCCWGGGACY	0.0001	-10.7	0.0004	16	5.19%	391.7	1.48%
M10407_3.00:HNF4A:HNF4G:NR2C1:NR2C2:NR2F1:NR2F2:NR2F6:NR6A1:PPARA:PPARD:RARA:RARB:RARG:RORA:RORB:RORC:RXRA:RXRB:RXRG	AAGTTCAAGGTCA	0.0001	-10.69	0.0004	6	1.95%	44.6	0.17%
M10184_3.00:EHF:ELF1:ELF2:ELF4:ELK1:ELK3:ELK4:ERF:ERG:ETS1:ETS2:ETV1:ETV2:ETV3:ETV3L:ETV4:ETV5:FEV:FLI1:GABPA	GCVGGAAGYG	0.0001	-10.67	0.0004	78	25.32%	4251.4	16.06%
M10205_3.00:EHF:ELF1:ELF2:ELF4:ELK1:ELK3:ELK4:ERF:ERG:ETS1:ETS2:ETV1:ETV2:ETV3:ETV3L:ETV4:ETV5:FEV:FLI1:GABPA	GCVGGAAGYG	0.0001	-10.67	0.0004	78	25.32%	4251.4	16.06%
M03381_3.00:ISL1:ISL2:NOTO:SHOX:SHOX2:VSX1	TTAAGTGC	0.0001	-10.66	0.0004	92	29.87%	5274.3	19.92%
M10622_3.00:AC023509.3:ATF2:ATF7	RTGACGTCAYCN	0.0001	-10.65	0.0004	22	7.14%	679.5	2.57%
M02774_3.00:RREB1	GGKKGGGGGTGGTTTGGGG	0.0001	-10.64	0.0004	8	2.60%	94.1	0.36%
M08063_3.00:ZNF519	GGGCGGCGGCGGCGG	0.0001	-10.61	0.0004	14	4.55%	308.4	1.16%
M05368_3.00:ARX:BARHL1:BARHL2:BARX1:BARX2:BSX:DLX1:DLX2:DLX3:DLX4:DLX5:DLX6:EMX1:EMX2:ESX1:EVX1:EVX2:GBX1:GBX2:HMX1:HMX2:HMX3:HOXA2:HOXB2:LBX1:LBX2:MEOX1:MEOX2:MNX1:MSX1:MSX2:NANOG:NANOGP8:NKX1-1:NKX1-2:PDX1:RAX:RAX2:TLX1:TLX2:TLX3:UNCX:VAX1:VAX2	CTAAACGGT	0.0001	-10.6	0.0004	30	9.74%	1113.8	4.21%
M05421_3.00:ALX1:ALX3:ALX4:ARX:DRGX:EN1:EN2:ESX1:HESX1:ISX:LHX2:LHX3:LHX4:LHX6:LHX8:LHX9:LMX1A:LMX1B:MIXL1:NOBOX:OTP:PHOX2A:PHOX2B:PROP1:PRRX1:PRRX2:RAX:RAX2:SEBOX:SHOX:SHOX2:UNCX:VSX1:VSX2:ZFHX2	YTAATTAC	0.0001	-10.59	0.0004	58	18.83%	2868.7	10.84%
M09474_3.00:ZNF524	GGTCCNGGGTTCGAG	0.0001	-10.57	0.0005	8	2.60%	95	0.36%
M10179_3.00:ELF1:ELF2:ELF4:ELK1:ELK3:ELK4:ERF:ERG:ETS1:ETS2:ETV1:ETV2:ETV3:ETV3L:ETV4:ETV5:FEV:FLI1:GABPA	GVVRCCGGAAGTGV	0.0001	-10.57	0.0005	8	2.60%	95.9	0.36%
M01560_3.00:ELF1:ELF2:ELF4:ELK1:ELK3:ELK4:ERF:ERG:ETS1:ETS2:ETV1:ETV2:ETV3:ETV3L:ETV4:ETV5:FEV:FLI1:GABPA	NRCCGGAAGT	0.0001	-10.56	0.0005	30	9.74%	1115.9	4.21%
M11327_3.00:RREB1	GRGWGGGGTTGGGGGG	0.0001	-10.55	0.0005	16	5.19%	396.9	1.50%
M03284_3.00:CRX:DMBX1:DPRX:GSC:GSC2:OTX1:OTX2:PITX1:PITX2:PITX3:TPRX1	NYTAATCCBY	0.0001	-10.55	0.0005	82	26.62%	4555.7	17.21%
M10161_3.00:E2F1:E2F2:E2F3:E2F4:E2F5:E2F6	GGGCGGGARG	0.0001	-10.54	0.0005	20	6.49%	584.9	2.21%
M04924_3.00:ELF1:ELF2:ELF4:ELK1:ELK3:ELK4:ERF:ERG:ETS1:ETS2:ETV1:ETV2:ETV3:ETV3L:ETV4:ETV5:FEV:FLI1:GABPA	NACCGGAAGTR	0.0001	-10.54	0.0005	10	3.25%	158.5	0.60%
M07984_3.00:ZNF263	GGGGAGGAG	0.0001	-10.53	0.0005	42	13.64%	1834.6	6.93%
M02145_3.00:ALX1:ALX3:ALX4:ARX:DRGX:ESX1:EVX1:EVX2:GBX1:GBX2:HESX1:HOXA2:HOXB2:ISX:LBX1:LBX2:LHX2:LHX3:LHX4:LHX9:MIXL1:MNX1:MSX1:MSX2:OTP:PHOX2A:PHOX2B:PROP1:PRRX1:PRRX2:RAX:RAX2:SEBOX:SHOX:SHOX2:UNCX:VSX1:VSX2	VYTAATTARB	0.0001	-10.53	0.0005	28	9.09%	1005.5	3.80%
M09153_3.00:ZNF35	AAAAAGYAWTGRNAAACAAAYAA	0.0001	-10.51	0.0005	14	4.55%	311.9	1.18%
M03310_3.00:ALX1:ALX3:ALX4:ARX:DRGX:EMX1:EMX2:EN1:EN2:ESX1:GBX1:GBX2:HESX1:ISX:LHX1:LHX2:LHX3:LHX4:LHX5:LHX6:LHX8:LHX9:LMX1A:LMX1B:MIXL1:MSX1:MSX2:NOBOX:NOTO:OTP:PHOX2A:PHOX2B:PROP1:PRRX1:PRRX2:RAX:RAX2:SEBOX:SHOX:SHOX2:UNCX:VAX1:VAX2:VSX1:VSX2:ZFHX2	VYTAATTAGB	0.0001	-10.49	0.0005	28	9.09%	1007.5	3.81%
M10005_3.00:EGR1:EGR2:EGR3:EGR4	GDGDGCGKGGGCGGRRG	0.0001	-10.49	0.0005	16	5.19%	398.7	1.51%
M04132_3.00:ESR1:ESR2:NR1D1:NR1D2:NR1H2:NR1H3:NR2C1:NR2C2:NR2F1:NR2F2:NR2F6:NR5A2:NR6A1:PPARA:PPARD:PPARG:RARA:RARB:RARG:RORA:RORB:RORC:RXRA:RXRB:RXRG:THRA:THRB	ATGTAGGTCAMN	0.0001	-10.49	0.0005	10	3.25%	159.2	0.60%
M03291_3.00:CRX:DLX1:DLX2:DLX4:DLX5:EMX1:LHX2:LHX9:PITX1:PITX2:VAX1:VSX1	CTAATTAN	0.0001	-10.48	0.0005	94	30.52%	5447	20.57%
M11621_3.00:ELF1:ELF2:ELF4:ELK1:ELK3:ELK4:ERF:ERG:ETS1:ETS2:ETV1:ETV2:ETV3:ETV3L:ETV4:ETV5:FEV:FLI1:GABPA	GGAGTTG	0.0001	-10.46	0.0005	134	43.51%	8553.8	32.31%
M05314_3.00:HOXA10:HOXA11:HOXA5:HOXA6:HOXA7:HOXA9:HOXB5:HOXB6:HOXB8:HOXB9:HOXC10:HOXC11:HOXC5:HOXC6:HOXC8:HOXC9:HOXD10:HOXD11:HOXD8:HOXD9	RTTTTACGAC	0.0001	-10.44	0.0005	10	3.25%	160.3	0.61%
M00172_3.00:ASCL1:ASCL2	NVCAGCTGBN	0.0001	-10.43	0.0005	112	36.36%	6823.7	25.77%
M10370_3.00:BORCS8-MEF2B:MEF2A:MEF2B:MEF2C:MEF2D	WKCTATTTTTRGM	0.0001	-10.4	0.0005	52	16.88%	2487.4	9.40%
M08243_3.00:USF2	SCSSGYCACGTGACC	0.0001	-10.35	0.0006	6	1.95%	47.6	0.18%
M11977_3.00:POU5F1	CATATKCAT	0.0001	-10.34	0.0006	24	7.79%	798.9	3.02%
M10175_3.00:ELF1:ELF2:ELF4:ELK1:ELK3:ELK4:ERF:ERG:ETS1:ETS2:ETV1:ETV2:ETV3:ETV3L:ETV4:ETV5:FEV:FLI1:GABPA	RGRCAGGAAGTGG	0.0001	-10.34	0.0006	14	4.55%	316.8	1.20%
M09519_3.00:ZNF121	VCGGGVCARSGCAGCVAGACCCCV	0.0001	-10.32	0.0006	16	5.19%	404.9	1.53%
M05483_3.00:HOXA10:HOXA11:HOXC10:HOXC11:HOXC12:HOXD10:HOXD11:HOXD12:MEOX2	DTTTACGACS	0.0001	-10.31	0.0006	12	3.90%	236.8	0.89%
M06608_3.00:ALX1:ALX3:ALX4:ARX:BARX1:BARX2:BSX:DLX1:DLX2:DLX3:DLX4:DLX5:DLX6:DRGX:EMX1:EMX2:EN1:EN2:ESX1:EVX1:EVX2:GBX1:GBX2:GSX1:GSX2:HESX1:HOXA2:HOXA3:HOXB2:HOXB3:HOXD3:ISX:LBX1:LBX2:LHX1:LHX2:LHX3:LHX4:LHX5:LHX6:LHX8:LHX9:LMX1A:LMX1B:MEOX1:MIXL1:MNX1:MSX1:MSX2:NKX1-1:NKX1-2:NOBOX:NOTO:OTP:PDX1:PHOX2A:PHOX2B:PROP1:PRRX1:PRRX2:RAX:RAX2:SEBOX:SHOX:SHOX2:UNCX:VAX1:VAX2:VSX1:VSX2:ZFHX2:ZFHX3	TTAATTA	0.0001	-10.28	0.0006	32	10.39%	1248.1	4.71%
M06733_3.00:ALX1:ALX3:ALX4:ARX:BARX1:BARX2:BSX:DLX2:DLX3:DRGX:EMX1:EMX2:EN1:EN2:ESX1:EVX1:EVX2:GBX1:GBX2:GSX1:GSX2:HESX1:HOXA2:HOXA3:HOXB2:HOXB3:HOXD3:ISX:LBX1:LBX2:LHX1:LHX2:LHX3:LHX4:LHX5:LHX6:LHX8:LHX9:LMX1A:LMX1B:MEOX1:MIXL1:MNX1:MSX1:MSX2:NKX1-1:NKX1-2:NOBOX:NOTO:OTP:PDX1:PHOX2A:PHOX2B:PROP1:PRRX1:PRRX2:RAX:RAX2:SEBOX:SHOX:SHOX2:UNCX:VAX1:VAX2:VSX1:VSX2:ZFHX2	TTAATTA	0.0001	-10.28	0.0006	32	10.39%	1248.1	4.71%
M08340_3.00:CTCF	CACCAGRKGGCR	0.0001	-10.27	0.0006	12	3.90%	237	0.90%
M01901_3.00:NFIL3	TKACGTAATM	0.0001	-10.26	0.0006	42	13.64%	1856.7	7.01%
M03019_3.00:MLX	ATCACGTGAT	0.0001	-10.24	0.0006	6	1.95%	48.5	0.18%
M04088_3.00:PAX4	CTAATTAGTTAATTAG	0.0001	-10.24	0.0006	6	1.95%	48.5	0.18%
M04046_3.00:CRX:DMBX1:DPRX:GSC:GSC2:OTX1:OTX2:PITX1:PITX2:PITX3:TPRX1	VTAATCCM	0.0001	-10.24	0.0006	110	35.71%	6698.8	25.30%
M04014_3.00:ARX:BARHL1:BARHL2:BARX1:BARX2:BSX:DLX1:DLX2:DLX3:DLX4:DLX5:DLX6:DRGX:EMX1:EMX2:ESX1:EVX1:EVX2:GBX1:GBX2:HMX1:HMX2:HMX3:HOXA2:HOXB2:LBX1:LBX2:MEOX1:MEOX2:MNX1:MSX1:MSX2:NANOG:NANOGP8:NKX1-1:NKX1-2:PDX1:RAX:RAX2:TLX1:TLX2:TLX3:UNCX:VAX1:VAX2:VSX1:VSX2	SCTAAACGGT	0.0001	-10.23	0.0006	24	7.79%	804.2	3.04%
M03311_3.00:ALX1:ALX3:ALX4:ARX:DRGX:EMX1:EMX2:EN1:EN2:ESX1:GBX1:GBX2:HESX1:ISX:LHX1:LHX2:LHX3:LHX4:LHX5:LHX6:LHX8:LHX9:LMX1A:LMX1B:MIXL1:MSX1:MSX2:NOBOX:NOTO:OTP:PHOX2A:PHOX2B:PROP1:PRRX1:PRRX2:RAX:RAX2:SEBOX:SHOX:SHOX2:UNCX:VAX1:VAX2:VSX1:VSX2:ZFHX2	TAATTAMGCTAATTA	0.0001	-10.22	0.0006	4	1.30%	13.3	0.05%
M09943_3.00:ATF1:CREB1:CREM	STGACGTCAB	0.0001	-10.21	0.0006	18	5.84%	501.8	1.90%
M05527_3.00:ALX1:ALX3:ALX4:ARX:BARHL1:BARHL2:DRGX:ESX1:GBX1:GBX2:HESX1:HMX1:HMX2:HMX3:ISX:LBX1:LBX2:MEOX1:MEOX2:MIXL1:MSX1:MSX2:PHOX2A:PHOX2B:PROP1:PRRX1:PRRX2:RAX:RAX2:SHOX:SHOX2:TLX2:UNCX:VENTX:VSX1:VSX2	GTTAATTRGS	0.0001	-10.19	0.0006	12	3.90%	239.8	0.91%
M05681_3.00:POU3F2	TAATTAGSMNNHTAATTA	0.0001	-10.13	0.0007	6	1.95%	49.9	0.19%
M08594_3.00:NFXL1	CCAAGGTCACACAGC	0.0001	-10.13	0.0007	6	1.95%	49.8	0.19%
M10400_3.00:ESR1:ESR2:NR1D1:NR1D2:NR1H2:NR1H3:NR1H4:NR2C1:NR2C2:NR2F1:NR2F2:NR2F6:NR4A1:NR5A2:NR6A1:PPARA:PPARD:PPARG:RARA:RARB:RARG:RORA:RORB:RORC:RXRA:RXRB:RXRG	GGRRGRTCARGAGKTCAAGG	0.0001	-10.11	0.0007	14	4.55%	323.6	1.22%
M08156_3.00:ZNF273	AGGAGCTAC	0.0001	-10.11	0.0007	12	3.90%	242	0.91%
M10972_3.00:CLOCK	WCASGTGG	0.0001	-10.09	0.0007	110	35.71%	6721	25.39%
M03852_3.00:ATF3:FOSB:JDP2	SRTGACGTCAYS	0.0001	-10.08	0.0007	18	5.84%	506.1	1.91%
M09924_3.00:ATF3:JDP2	VTCACGTSACC	0.0001	-10.07	0.0007	12	3.90%	242.7	0.92%
M05997_3.00:EOMES:TBR1:TBX21	DAGGTGTGAA	0.0001	-10.07	0.0007	38	12.34%	1623.2	6.13%
M08777_3.00:ZNF708	AGGYACAGC	0.0001	-10.07	0.0007	16	5.19%	413.5	1.56%
M09849_3.00:BHLHE40:BHLHE41	STCACGTGCY	0.0001	-10.05	0.0007	14	4.55%	325.3	1.23%
M03675_3.00:GMEB1:GMEB2	KTACGTAA	0.0001	-10.03	0.0007	44	14.29%	2003	7.57%
M04894_3.00:DMRT1:DMRT2:DMRT3:DMRTA2:DMRTC2	RAACGATACA	0.0001	-10.03	0.0007	6	1.95%	50.6	0.19%
M09532_3.00:SCRT1:SCRT2	AWKCAACAGGTG	0.0001	-10.03	0.0007	8	2.60%	103.2	0.39%
M03219_3.00:FOXC1:FOXC2:FOXD1:FOXD2:FOXD3:FOXD4:FOXD4L1:FOXD4L3:FOXD4L4:FOXD4L5:FOXD4L6:FOXE1:FOXF1:FOXF2:FOXG1:FOXI1:FOXI3:FOXK2:FOXL1:FOXL2:FOXP4:FOXS1	ATRTTTACWTA	0.0001	-9.993	0.0007	34	11.04%	1386.3	5.24%
M08009_3.00:ZNF132	GGARAGDGGGAAGGA	0.0001	-9.987	0.0007	14	4.55%	327.8	1.24%
M10204_3.00:ELF1:ELF2:ELF4:ELK1:ELK3:ELK4:ERF:ERG:ETS1:ETS2:ETV1:ETV2:ETV3:ETV3L:ETV4:ETV5:ETV6:FEV:FLI1:GABPA	RRACMGGAAGYGRV	0.0001	-9.985	0.0007	22	7.14%	711.4	2.69%
M06070_3.00:ZNF623	NGBGCGAAGGTCSYGKGGBN	0.0001	-9.982	0.0007	4	1.30%	14.6	0.06%
M12056_3.00:BORCS8-MEF2B:MEF2A:MEF2B:MEF2C:MEF2D	TGRGTTATTTTTARACMG	0.0001	-9.982	0.0007	4	1.30%	14.9	0.06%
M10661_3.00:ELF5:SPI1:SPIB:SPIC	AGAGGAAGTG	0.0001	-9.955	0.0008	14	4.55%	328.4	1.24%
M02103_3.00:GCM1:GCM2	NNRCCCGCAT	0.0001	-9.954	0.0008	74	24.03%	4053.3	15.31%
M11922_3.00:ISL1:ISL2:NOTO:SHOX:SHOX2:VSX1	CACTTAG	0.0001	-9.951	0.0008	38	12.34%	1633	6.17%
M06684_3.00:NKX3-1:NKX3-2	BTTAAGTG	0.0001	-9.95	0.0008	66	21.43%	3487.6	13.17%
M06819_3.00:ESR1:ESR2:HNF4A:HNF4G:NR1D2:NR1H2:NR1H3:NR1H4:NR2C1:NR2C2:NR2F1:NR2F2:NR2F6:NR4A1:NR4A2:NR4A3:NR5A2:NR6A1:PPARA:PPARD:PPARG:RARA:RARB:RARG:RORA:RORB:RORC:RXRA:RXRB:RXRG:THRA:THRB	AAGGTCA	0.0001	-9.942	0.0008	84	27.27%	4780.8	18.06%
M11087_3.00:ATF4	GVTGAYGTAAKS	0.0001	-9.933	0.0008	30	9.74%	1156	4.37%
M01931_3.00:ALX1:ALX3:ALX4:ARX:DRGX:PHOX2A:PHOX2B:PROP1:SHOX:SHOX2:UNCX:VSX1:VSX2:ZFHX3	BTMATTANN	0.0001	-9.921	0.0008	172	55.84%	11793.1	44.54%
M04081_3.00:ALX1:ALX3:ALX4:ARX:BARX1:BARX2:BSX:DLX1:DLX2:DLX3:DLX4:DLX5:DLX6:DRGX:EMX1:EMX2:EN1:EN2:ESX1:EVX1:EVX2:GBX1:GBX2:GSX1:GSX2:HESX1:HOXA1:HOXA2:HOXA3:HOXB1:HOXB2:HOXB3:HOXD3:ISL1:ISL2:ISX:LBX1:LBX2:LHX1:LHX2:LHX3:LHX4:LHX5:LHX6:LHX8:LHX9:LMX1A:LMX1B:MEOX1:MIXL1:MNX1:MSX1:MSX2:NKX1-1:NKX1-2:NOBOX:NOTO:OTP:PDX1:PHOX2A:PHOX2B:PROP1:PRRX1:PRRX2:RAX:RAX2:SEBOX:SHOX:SHOX2:UNCX:VAX1:VAX2:VSX1:V…	TAATTAABCAATTA	0.0001	-9.903	0.0008	10	3.25%	172	0.65%
M08704_3.00:JUN:JUNB:JUND	ATGAGTCAT	0.0001	-9.887	0.0008	12	3.90%	247.9	0.94%
M00615_3.00:NKX3-1:NKX3-2	YTAAGTGBNN	0.0001	-9.885	0.0008	118	38.31%	7376.9	27.86%
M04490_3.00:ATF3:JDP2	SRTGACGTCAYS	0.0001	-9.85	0.0008	12	3.90%	248.4	0.94%
M05312_3.00:HOXA10:HOXA11:HOXA5:HOXA6:HOXA7:HOXA9:HOXB5:HOXB6:HOXB8:HOXB9:HOXC10:HOXC11:HOXC5:HOXC6:HOXC8:HOXC9:HOXD10:HOXD11:HOXD8:HOXD9	DTTTTACGAC	0.0001	-9.85	0.0008	12	3.90%	248.5	0.94%
M11935_3.00:PAX4	GAAWAATTACC	0.0001	-9.847	0.0008	70	22.73%	3781.7	14.28%
M04247_3.00:ATF6:ATF6B	GTGACGTCATC	0.0001	-9.828	0.0008	6	1.95%	52	0.20%
M08995_3.00:GATA1:GATA2:GATA3:GATA4:GATA5:GATA6	CTGSNSVVBRCAGATAAGVV	0.0001	-9.828	0.0008	6	1.95%	52.7	0.20%
M11432_3.00:MTF1	TGCGCAC	0.0001	-9.815	0.0009	94	30.52%	5541.7	20.93%
M08361_3.00:CTCF	CCACYAGRKGGCG	0.0001	-9.776	0.0009	12	3.90%	250.1	0.94%
M08246_3.00:USF2	GGTCACGTGRCSV	0.0001	-9.73	0.0009	6	1.95%	53.5	0.20%
M10371_3.00:BORCS8-MEF2B:MEF2A:MEF2B:MEF2C:MEF2D	DKCTATTTTTRGM	0.0001	-9.729	0.0009	52	16.88%	2553.8	9.65%
M00329_3.00:CRX:DMBX1:DPRX:GSC:GSC2:OTX1:OTX2:PITX1:PITX2:PITX3:TPRX1	NCTAATCCSV	0.0001	-9.716	0.0009	70	22.73%	3797.1	14.34%
M08348_3.00:CTCF	CCACYAGRKGGCR	0.0001	-9.703	0.0009	12	3.90%	252	0.95%
M05651_3.00:POU2F2	ATGCATATGCAW	0.0001	-9.631	0.001	12	3.90%	254.2	0.96%
M03215_3.00:EHF:ELF1:ELF2:ELF3:ELF4:ELF5:ETV6:ETV7:SPI1:SPIC	ACCCGGAAGTD	0.0001	-9.618	0.001	24	7.79%	837.8	3.16%
M00803_3.00:PURB	KDGTGGGH	0.0001	-9.616	0.001	230	74.68%	17018.9	64.28%
M09994_3.00:KLF1:KLF12:KLF2:KLF3:KLF4:KLF5:KLF6:KLF7:KLF8	DGGGYGKGGCCGGG	0.0001	-9.61	0.001	20	6.49%	626.2	2.37%
M03509_3.00:POU6F2	GCTAATTAGW	0.0001	-9.556	0.0011	16	5.19%	432.5	1.63%
M06039_3.00:MGA	DAGGTGTGAADWNKNNCRCS	0.0001	-9.541	0.0011	4	1.30%	16.7	0.06%
M08664_3.00:MITF:TFE3:TFEB:TFEC	GTCACGTGAC	0.0001	-9.54	0.0011	6	1.95%	55.2	0.21%
M09841_3.00:MITF:TFEB	RGTCACGTG	0.0001	-9.54	0.0011	6	1.95%	55.5	0.21%
M09876_3.00:MITF:TFEB	RGTCACGTG	0.0001	-9.54	0.0011	6	1.95%	55.5	0.21%
M04572_3.00:MAF:MAFA:MAFB:MAFG:MAFK	AGTCAGCANWTTT	0.0001	-9.531	0.0011	8	2.60%	111.3	0.42%
M09436_3.00:GTF3A	GGATGGGAG	0.0001	-9.526	0.0011	20	6.49%	630.3	2.38%
M01323_3.00:CRX:DMBX1:DPRX:GSC:GSC2:OTX1:OTX2:PITX1:PITX2:PITX3:TPRX1	WTAATCCN	0.0001	-9.479	0.0012	84	27.27%	4843.7	18.30%
M11448_3.00:ZNF735	KGGCAGCAGA	0.0001	-9.418	0.0012	32	10.39%	1308.7	4.94%
M10927_3.00:TFAP4	RMCAGCTGC	0.0001	-9.415	0.0012	76	24.68%	4266.4	16.11%
M10754_3.00:RUNX1:RUNX2:RUNX3	RCAGGATGTGGT	0.0001	-9.413	0.0012	8	2.60%	113.3	0.43%
M11860_3.00:ALX1:ALX3:ALX4:ARX:BARX1:BARX2:BSX:DLX1:DLX2:DLX3:DLX4:DLX5:DLX6:DRGX:EMX1:EMX2:EN1:EN2:ESX1:EVX1:EVX2:GBX1:GBX2:GSX1:GSX2:HESX1:HOXA1:HOXA2:HOXA3:HOXB1:HOXB2:HOXB3:HOXD3:ISX:LBX1:LBX2:LHX1:LHX2:LHX3:LHX4:LHX5:LHX6:LHX8:LHX9:LMX1A:LMX1B:MEOX1:MIXL1:MNX1:MSX1:MSX2:NKX1-1:NKX1-2:NOBOX:NOTO:OTP:PDX1:PHOX2A:PHOX2B:PROP1:PRRX1:PRRX2:RAX:RAX2:SEBOX:SHOX:SHOX2:UNCX:VAX1:VAX2:VSX1:VSX2:ZFHX2:…	AATWAGHW	0.0001	-9.382	0.0013	142	46.10%	9386.4	35.45%
M10994_3.00:LYL1:TAL1:TAL2	CAGATGG	0.0001	-9.372	0.0013	96	31.17%	5757.3	21.75%
M11608_3.00:EHF:ELF1:ELF2:ELF3:ELF4:ELF5:ELK1:ELK3:ELK4:ERF:ERG:ETS1:ETS2:ETV1:ETV2:ETV3:ETV3L:ETV4:ETV5:ETV6:ETV7:FEV:FLI1:GABPA:SPDEF	DVCAGGAAGTGS	0.0001	-9.364	0.0013	46	14.94%	2192.9	8.28%
M05182_3.00:HOXA13:HOXB13:HOXC13:HOXD13	RTTTTACGAGS	0.0001	-9.358	0.0013	6	1.95%	57.4	0.22%
M04961_3.00:EHF:ELF1:ELF2:ELF3:ELF4:ELF5:ETV6:ETV7:SPI1:SPIC	AACVAGGAAGTR	0.0001	-9.35	0.0013	16	5.19%	440.4	1.66%
M10657_3.00:EHF:ELF1:ELF2:ELF3:ELF4:ELF5:ETV6:ETV7:SPI1:SPIC	ACVAGGAAGT	0.0001	-9.35	0.0013	16	5.19%	440.9	1.67%
M11966_3.00:POU3F2	BYCATBCRWAATRARY	0.0001	-9.349	0.0013	12	3.90%	262.9	0.99%
M01924_3.00:JUN:JUNB:JUND	ATGACKCAH	0.0001	-9.345	0.0013	80	25.97%	4567.9	17.25%
M03266_3.00:FOXI1:FOXJ3:FOXK1:FOXK2	TGTTTAC	0.0001	-9.345	0.0013	118	38.31%	7464.1	28.19%
M08379_3.00:CTCF	GGCCACCAGGKGGCG	0.0001	-9.339	0.0013	4	1.30%	17.6	0.07%
M08551_3.00:ZNF623	CAAAGGCCCTGRGGCA	0.0001	-9.339	0.0013	4	1.30%	17.6	0.07%
M12413_3.00:SMAD1:SMAD3:SMAD5:SMAD9	AKGTCCGTMCATC	0.0001	-9.339	0.0013	4	1.30%	17.2	0.06%
M05612_3.00:HOXA3:HOXA4:HOXA5:HOXA6:HOXA7:HOXB3:HOXB4:HOXB5:HOXB6:HOXB7:HOXB8:HOXC4:HOXC5:HOXC6:HOXC8:HOXD3:HOXD4:HOXD8:PDX1	VHTAATTACS	0.0001	-9.309	0.0013	38	12.34%	1684.5	6.36%
M08744_3.00:BCL11A:BCL11B	TGGTCAG	0.0001	-9.302	0.0013	82	26.62%	4721	17.83%
M03397_3.00:ALX1:ALX3:ALX4:ARX:BARHL1:BARHL2:BARX1:BARX2:BSX:DLX1:DLX2:DLX3:DLX4:DLX5:DLX6:DRGX:EMX1:EMX2:EN1:EN2:ESX1:EVX1:EVX2:GBX1:GBX2:GSX1:GSX2:HESX1:HMX1:HMX2:HMX3:HOXA1:HOXA2:HOXA3:HOXA4:HOXA5:HOXB1:HOXB2:HOXB3:HOXB4:HOXB5:HOXC4:HOXC5:HOXD1:HOXD3:HOXD4:ISX:LBX1:LBX2:LHX2:LHX3:LHX4:LHX9:MEOX1:MEOX2:MIXL1:MNX1:MSX1:MSX2:NANOG:NANOGP8:NKX1-1:NKX1-2:NOBOX:NOTO:OTP:PDX1:PHOX2A:PHOX2B:PROP1:PRRX…	GCTAATTRGB	0.0001	-9.299	0.0013	28	9.09%	1081.8	4.09%
M04292_3.00:MITF:TFEB	NGTCACGTGCG	0.0001	-9.269	0.0014	6	1.95%	58.6	0.22%
M04653_3.00:GLIS2	GCDTCGYGGGGGGT	0.0001	-9.269	0.0014	6	1.95%	58.9	0.22%
M08909_3.00:BORCS8-MEF2B:MEF2A:MEF2B:MEF2C:MEF2D	CTATTTTTAG	0.0001	-9.258	0.0014	56	18.18%	2873.1	10.85%
M01571_3.00:ELF1:ELF2:ELF4:ELK1:ELK3:ELK4:ERF:ERG:ETS1:ETS2:ETV1:ETV2:ETV3:ETV3L:ETV4:ETV5:FEV:FLI1:GABPA	NRCCGGAART	0.0001	-9.238	0.0014	30	9.74%	1202.4	4.54%
M08359_3.00:CTCF	CCACYAGRGGG	0.0001	-9.238	0.0014	20	6.49%	644	2.43%
M11121_3.00:CEBPA:CEBPB:CEBPE	TTRTGCAATH	0.0001	-9.231	0.0014	106	34.42%	6545.1	24.72%
M11115_3.00:JUN:JUNB:JUND	NTGAGTCA	0.0001	-9.225	0.0014	74	24.03%	4146.8	15.66%
M05802_3.00:NR1D2:NR1H2:NR1H3:NR1H4:NR2C1:NR2C2:NR2F1:NR2F2:NR2F6:NR4A1:NR4A2:NR4A3:NR5A2:NR6A1:PPARA:PPARD:PPARG:RARA:RARB:RARG:RORA:RORB:RORC:RXRA:RXRB:RXRG	NRRGGTCAN	0.0001	-9.211	0.0014	112	36.36%	7015.5	26.50%
M06043_3.00:ZNF275	NAGGTGCTAGGGDCCCVYTH	0.001	-9.185	0.0015	8	2.60%	117.6	0.44%
M04933_3.00:EHF:ELF1:ELF2:ELF3:ELF4:ELF5:ELK1:ELK3:ELK4:ERF:ERG:ETS1:ETS2:ETV1:ETV2:ETV3:ETV3L:ETV4:ETV5:ETV6:ETV7:FEV:FLI1:GABPA:SPDEF	AATSCGGAAGTR	0.001	-9.182	0.0015	6	1.95%	59	0.22%
M05406_3.00:HOXA13:HOXB13:HOXC13:HOXD13	GTTTTACGAGS	0.001	-9.182	0.0015	6	1.95%	59.9	0.23%
M02604_3.00:LIN54	GTTTGAAT	0.001	-9.175	0.0015	92	29.87%	5484.7	20.72%
M05409_3.00:ISL1:ISL2:NOTO:SHOX:SHOX2:VSX1	GCACTTAR	0.001	-9.163	0.0015	106	34.42%	6556.9	24.77%
M10988_3.00:ARNT:ARNT2	SSCACGYR	0.001	-9.161	0.0015	50	16.23%	2477.8	9.36%
M00409_3.00:PAX3:PAX7	NVNATTA	0.001	-9.157	0.0015	258	83.77%	19797	74.78%
M11347_3.00:PRDM16	GATGAG	0.001	-9.156	0.0015	106	34.42%	6557.7	24.77%
M10221_3.00:FOXC2:FOXD1:FOXD2:FOXD3:FOXG1:FOXI1:FOXI2:FOXI3:FOXJ2:FOXJ3:FOXK1:FOXK2:FOXP1:FOXP3	TTGTTTATKTTTW	0.001	-9.154	0.0015	36	11.69%	1572.7	5.94%
M10225_3.00:FOXC2:FOXD1:FOXD2:FOXD3:FOXG1:FOXI1:FOXI2:FOXI3:FOXJ2:FOXJ3:FOXK1:FOXK2:FOXP1:FOXP3:FOXP4	TTGTTTATKTTTW	0.001	-9.154	0.0015	36	11.69%	1572.7	5.94%
M02794_3.00:EHF:ELF1:ELF2:ELF3:ELF4:ELF5:ELK1:ELK3:ELK4:ERF:ERG:ETS1:ETS2:ETV1:ETV2:ETV3:ETV3L:ETV4:ETV5:ETV6:ETV7:FEV:FLI1:GABPA:SPDEF	ACCCGGAAGT	0.001	-9.154	0.0015	10	3.25%	188.1	0.71%
M00616_3.00:ALX1:ALX3:ALX4:ARX:BARHL1:BARHL2:DRGX:ESX1:EVX1:EVX2:GBX1:GBX2:HESX1:LBX1:LBX2:MEOX1:MEOX2:MIXL1:MSX1:MSX2:PHOX2A:PHOX2B:PROP1:PRRX1:PRRX2:RAX:RAX2:SHOX:SHOX2:TLX1:TLX3:UNCX:VSX1:VSX2	HTAATTAGS	0.001	-9.138	0.0015	48	15.58%	2346	8.86%
M11290_3.00:GLI1:GLI2:GLI3	STGGGTGGTCT	0.001	-9.128	0.0015	18	5.84%	547.6	2.07%
M11950_3.00:POU2F1	ADGAATATKCAHNHW	0.001	-9.111	0.0016	12	3.90%	269.1	1.02%
M09055_3.00:ZNF669	YGATGAC	0.001	-9.105	0.0016	40	12.99%	1828.3	6.91%
M11964_3.00:POU4F1	TATTAAYTRM	0.001	-9.081	0.0016	52	16.88%	2620.3	9.90%
M08726_3.00:SNAI2	ACAGGTGC	0.001	-9.078	0.0016	48	15.58%	2352.1	8.88%
M02176_3.00:POU2F2:POU6F1	AYTAATTART	0.001	-9.066	0.0016	22	7.14%	759.2	2.87%
M05436_3.00:CRX:DMBX1:DPRX:GSC:GSC2:OTX1:OTX2:PITX1:PITX2:PITX3:TPRX1	YTAATCCC	0.001	-9.029	0.0017	74	24.03%	4172.8	15.76%
M04493_3.00:ATF3:JDP2	SATGASTCATB	0.001	-9.018	0.0017	20	6.49%	655.9	2.48%
M11319_3.00:EGR1:EGR2:EGR3:EGR4	GCGGGGGCGG	0.001	-9.018	0.0017	20	6.49%	655.9	2.48%
M02363_3.00:NAIF1	BDRCGTARN	0.001	-9.012	0.0017	64	20.78%	3458.8	13.06%
M02931_3.00:MITF:TFEB	RTCACGTGAY	0.001	-9.012	0.0017	6	1.95%	61.2	0.23%
M04768_3.00:GLIS1	GCKTCGTGGGGGGTV	0.001	-9.012	0.0017	6	1.95%	62	0.23%
M01905_3.00:ATF2:CREB5	TKACGTCATN	0.001	-9.003	0.0017	40	12.99%	1837.1	6.94%
M11143_3.00:CEBPD	TTKNGCAATV	0.001	-8.997	0.0017	94	30.52%	5662.8	21.39%
M02297_3.00:ARX:BARHL1:BARHL2:BARX1:BARX2:BSX:EMX1:EMX2:EN1:EN2:ESX1:EVX1:EVX2:GBX1:GBX2:GSX1:GSX2:HMX1:HMX2:HMX3:HOXA1:HOXA2:HOXA3:HOXA4:HOXA5:HOXB1:HOXB2:HOXB3:HOXB4:HOXB5:HOXC4:HOXC5:HOXD1:HOXD3:HOXD4:LHX1:LHX5:MEOX1:MEOX2:MIXL1:MNX1:MSX1:MSX2:NANOG:NANOGP8:NKX1-1:NKX1-2:PDX1:PRRX1:PRRX2:RAX:RAX2:UNCX:VAX1:VAX2:VENTX	ACTAATTACN	0.001	-8.993	0.0017	22	7.14%	764	2.89%
M06728_3.00:ALX1:ALX3:ALX4:ARX:DLX1:DLX2:DLX3:DLX4:DLX5:DLX6:DRGX:ESX1:HOXA2:HOXB2:ISX:LHX1:LHX2:LHX3:LHX4:LHX5:LHX9:MEOX1:MIXL1:MNX1:PHOX2A:PHOX2B:PROP1:PRRX1:PRRX2:RAX:RAX2:SEBOX:SHOX:SHOX2:UNCX:VSX1:VSX2	TTAATTA	0.001	-8.984	0.0017	32	10.39%	1340.9	5.06%
M05064_3.00:FOXC2:FOXD1:FOXD2:FOXD3:FOXG1:FOXI1:FOXI2:FOXI3:FOXJ2:FOXJ3:FOXK1:FOXK2:FOXP1:FOXP3	TTGTTTACGT	0.001	-8.977	0.0017	16	5.19%	455.5	1.72%
M11851_3.00:CRX:DMBX1:DPRX:GSC:GSC2:OTX1:OTX2:PITX1:PITX2:PITX3:TPRX1	DAAGGGATTARAD	0.001	-8.971	0.0017	58	18.83%	3044	11.50%
M05489_3.00:SIX1:SIX2:SIX4:SIX5	CCGTATCRYN	0.001	-8.957	0.0018	22	7.14%	765.5	2.89%
M08186_3.00:ZNF492:ZNF98	AAAAGAGCAAYAAAAAGG	0.001	-8.913	0.0018	12	3.90%	275.8	1.04%
M01892_3.00:ATF3:JDP2	TKACGTCATN	0.001	-8.913	0.0018	66	21.43%	3612.3	13.64%
M11536_3.00:RBPJ	ASCGTGGGAAM	0.001	-8.896	0.0019	14	4.55%	364.4	1.38%
M10007_3.00:EGR1:EGR2:EGR3:EGR4	GRGGGGGWGKGGGHGGGG	0.001	-8.881	0.0019	16	5.19%	459.2	1.73%
M03464_3.00:ARX:BARHL1:BARHL2:BARX1:BARX2:BSX:DLX1:DLX2:DLX3:DLX4:DLX5:DLX6:EMX1:EMX2:ESX1:EVX1:EVX2:GBX1:GBX2:HMX1:HMX2:HMX3:HOXA2:HOXB2:LBX1:LBX2:MEOX1:MEOX2:MNX1:MSX1:MSX2:NANOG:NANOGP8:NKX1-1:NKX1-2:PDX1:RAX:RAX2:TLX1:TLX2:TLX3:UNCX:VAX1:VAX2	TAAWYGBYSYTAAWYG	0.001	-8.848	0.002	6	1.95%	63.8	0.24%
M04932_3.00:EHF:ELF1:ELF2:ELF3:ELF4:ELF5:ELK1:ELK3:ELK4:ERF:ERG:ETS1:ETS2:ETV1:ETV2:ETV3:ETV3L:ETV4:ETV5:ETV6:ETV7:FEV:FLI1:GABPA:SPDEF	AACCAGGAAGTR	0.001	-8.848	0.002	6	1.95%	64	0.24%
M05508_3.00:ALX1:ALX3:ALX4:ARX:BARX1:BARX2:BSX:DLX1:DLX2:DLX3:DLX4:DLX5:DLX6:DRGX:EN1:EN2:ESX1:GBX1:GBX2:GSX1:GSX2:HESX1:HOXA1:HOXA2:HOXA3:HOXA4:HOXA5:HOXB1:HOXB2:HOXB3:HOXB4:HOXB5:HOXC4:HOXC5:HOXD3:HOXD4:ISX:LBX2:LHX1:LHX2:LHX3:LHX4:LHX5:LHX6:LHX8:LHX9:LMX1A:LMX1B:MEOX1:MIXL1:MNX1:MSX1:MSX2:NKX1-1:NKX1-2:NOBOX:NOTO:OTP:PDX1:PHOX2A:PHOX2B:PROP1:PRRX1:PRRX2:RAX:RAX2:SEBOX:SHOX:SHOX2:UNCX:VAX1:VAX2…	CTAATTAA	0.001	-8.839	0.002	36	11.69%	1598.8	6.04%
M04963_3.00:EHF:ELF1:ELF2:ELF3:ELF4:ELF5:ETV6:ETV7:SPI1:SPIC	AASGAGGAAGTR	0.001	-8.833	0.002	16	5.19%	461.3	1.74%
M03431_3.00:ALX1:ALX3:ALX4:ARX:BARX1:BARX2:BSX:DLX1:DLX2:DLX3:DLX4:DLX5:DLX6:DRGX:EMX1:EMX2:EN1:EN2:ESX1:EVX1:EVX2:GBX1:GBX2:GSX1:GSX2:HMX1:HMX3:HOXA1:HOXA2:HOXA3:HOXA4:HOXA5:HOXB1:HOXB2:HOXB3:HOXB4:HOXB5:HOXC4:HOXC5:HOXD1:HOXD3:HOXD4:ISX:LHX3:LHX4:MEOX1:MIXL1:MNX1:MSX1:MSX2:NKX1-1:NKX1-2:NOTO:OTP:PDX1:PHOX2A:PHOX2B:PROP1:PRRX1:PRRX2:RAX:RAX2:SEBOX:SHOX:SHOX2:UNCX:VAX1:VAX2:VENTX:VSX1:VSX2	KTTAATTRGN	0.001	-8.807	0.002	70	22.73%	3912.8	14.78%
M09446_3.00:ZNF189	VTGGAACAGAAGSKGCGR	0.001	-8.806	0.002	8	2.60%	124.9	0.47%
M05325_3.00:HOXA10:HOXA11:HOXA9:HOXB9:HOXC10:HOXC11:HOXC12:HOXC9:HOXD10:HOXD11:HOXD12:HOXD9	RTWAANTTTTACGACN	0.001	-8.792	0.002	4	1.30%	20.7	0.08%
M10630_3.00:CTCFL	GCCASCAGGGGGCGCYVNNG	0.001	-8.792	0.002	4	1.30%	20	0.08%
M01080_3.00:CEBPA:CEBPB:CEBPE	NTTRCGCAA	0.001	-8.779	0.0021	22	7.14%	775.4	2.93%
M04409_3.00:FIGLA	VCAGGTGGK	0.001	-8.776	0.0021	74	24.03%	4206.7	15.89%
M02602_3.00:LIN54	RTTTAAAT	0.001	-8.769	0.0021	74	24.03%	4207.2	15.89%
M08245_3.00:USF2	GYCACGTGACC	0.001	-8.768	0.0021	6	1.95%	64.1	0.24%
M04019_3.00:ALX1:ALX3:ALX4:ARX:BARHL1:BARHL2:DRGX:ESX1:EVX1:EVX2:GBX1:GBX2:HESX1:LBX1:LBX2:MEOX1:MEOX2:MIXL1:MSX1:MSX2:PHOX2A:PHOX2B:PROP1:PRRX1:PRRX2:RAX:RAX2:SHOX:SHOX2:TLX1:TLX3:UNCX:VSX1:VSX2	NTAATTAG	0.001	-8.766	0.0021	62	20.13%	3347.8	12.65%
M06715_3.00:CRX:DMBX1:DPRX:GSC:GSC2:OTX1:OTX2:PITX1:PITX2:PITX3:TPRX1	TTAATCC	0.001	-8.744	0.0021	72	23.38%	4065.4	15.36%
M10188_3.00:ELF5:SPI1:SPIB:SPIC	RRAAAGAGGAAGTGV	0.001	-8.702	0.0022	8	2.60%	126.2	0.48%
M08016_3.00:RBAK	GGGAGAGRARVRGSC	0.001	-8.697	0.0022	24	7.79%	891.8	3.37%
M05112_3.00:ISL1:ISL2:NOTO:SHOX:SHOX2:VSX1	GCACTTAR	0.001	-8.693	0.0022	92	29.87%	5557.7	20.99%
M01071_3.00:CEBPD	NTTRCGCAA	0.001	-8.691	0.0022	22	7.14%	780.1	2.95%
M11323_3.00:CTCFL	AGGGGGCGC	0.001	-8.691	0.0022	16	5.19%	467.9	1.77%
M09489_3.00:ZNF594	GRGGTGAGAGCSGCK	0.001	-8.689	0.0022	6	1.95%	65.5	0.25%
M10185_3.00:ELF1:ELF2:ELF4:ELK1:ELK3:ELK4:ERF:ERG:ETS1:ETS2:ETV1:ETV2:ETV3:ETV3L:ETV4:ETV5:FEV:FLI1:GABPA	VRCAGGAAGKR	0.001	-8.669	0.0023	66	21.43%	3643.6	13.76%
M03409_3.00:ALX1:ALX3:ALX4:ARX:BARX1:BARX2:BSX:DLX1:DLX2:DLX3:DLX4:DLX5:DLX6:DRGX:EMX1:EMX2:EN1:EN2:ESX1:EVX1:EVX2:GBX1:GBX2:GSX1:GSX2:HMX1:HMX3:HOXA1:HOXA2:HOXA3:HOXA4:HOXA5:HOXB1:HOXB2:HOXB3:HOXB4:HOXB5:HOXC4:HOXC5:HOXD1:HOXD3:HOXD4:ISX:LHX3:LHX4:MEOX1:MIXL1:MNX1:MSX1:MSX2:NKX1-1:NKX1-2:NOTO:OTP:PDX1:PHOX2A:PHOX2B:PROP1:PRRX1:PRRX2:RAX:RAX2:SEBOX:SHOX:SHOX2:UNCX:VAX1:VAX2:VENTX:VSX1:VSX2	NYTAATTAGD	0.001	-8.663	0.0023	68	22.08%	3787.2	14.30%
M04351_3.00:USF1:USF2	BGTCACATGGT	0.001	-8.658	0.0023	12	3.90%	283.6	1.07%
M10410_3.00:HNF4A:HNF4G:NR2E1:NR2F1:NR2F2:NR2F6:NR6A1:RXRA:RXRB:RXRG	TGGACTTTGVMCYB	0.001	-8.634	0.0023	10	3.25%	201.1	0.76%
M10430_3.00:HNF4A:HNF4G:NR2E1:NR2F1:NR2F2:NR2F6:NR6A1:RXRA:RXRB:RXRG	TGGACTTTGVMCYB	0.001	-8.634	0.0023	10	3.25%	201.1	0.76%
M10875_3.00:TFAP2A:TFAP2B:TFAP2C:TFAP2D:TFAP2E	KGCCTGVRGGCTSDBS	0.001	-8.632	0.0023	20	6.49%	675.1	2.55%
M02209_3.00:POU2F2:POU6F1	CTAATTAT	0.001	-8.613	0.0024	20	6.49%	676.6	2.56%
M11124_3.00:FOS:FOSB:FOSL1:FOSL2	TGAGTCAT	0.001	-8.585	0.0024	42	13.64%	2005.1	7.57%
M02479_3.00:ESR1:ESR2:NR1D1:NR1D2:NR1H2:NR1H3:NR1H4:NR2C1:NR2C2:NR2F1:NR2F2:NR2F6:NR4A1:NR4A2:NR4A3:NR5A2:NR6A1:PPARA:PPARD:PPARG:RARA:RARB:RARG:RORA:RORB:RORC:RXRA:RXRB:RXRG	RGGTCANN	0.001	-8.581	0.0024	108	35.06%	6807.1	25.71%
M08251_3.00:MAX	DGCACGTGGCY	0.001	-8.552	0.0025	16	5.19%	473.3	1.79%
M01745_3.00:ARID5A:ARID5B	NNAATWTNNN	0.001	-8.542	0.0025	218	70.78%	16115.6	60.87%
M10552_3.00:TBX2:TBX3:TBX4:TBX5	RAGGTGYBA	0.001	-8.54	0.0025	108	35.06%	6814.9	25.74%
M04472_3.00:BATF:BATF3	GATGACGTCATC	0.001	-8.535	0.0025	6	1.95%	67.4	0.25%
M06010_3.00:TBX6	DAGGTGTKAA	0.001	-8.531	0.0025	62	20.13%	3376.1	12.75%
M10682_3.00:DBX2:NKX3-1:NKX3-2	AAGCACTTAA	0.001	-8.521	0.0026	30	9.74%	1254.2	4.74%
M00167_3.00:TFAP2A:TFAP2B:TFAP2C:TFAP2D:TFAP2E	TNGCCTSAGG	0.001	-8.521	0.0026	52	16.88%	2681.5	10.13%
M02939_3.00:ELF1:ELF2:ELF4:ELK1:ELK3:ELK4:ERF:ERG:ETS1:ETS2:ETV1:ETV2:ETV3:ETV3L:ETV4:ETV5:FEV:FLI1:GABPA	ACCGGAAGT	0.001	-8.52	0.0026	10	3.25%	204.7	0.77%
M08106_3.00:ZFP69B	GTGGCTGGAAAR	0.001	-8.52	0.0026	10	3.25%	204.2	0.77%
M04333_3.00:CLOCK	GMCACGTGYN	0.001	-8.506	0.0026	16	5.19%	475.2	1.79%
M04467_3.00:ATF1:CREB1:CREM	TACGTCACV	0.001	-8.504	0.0026	26	8.44%	1018.1	3.85%
M04281_3.00:USF2	KGTCACATGGY	0.001	-8.503	0.0026	12	3.90%	288.8	1.09%
M02925_3.00:TBX2:TBX3:TBX4:TBX5	AGGTGTGAA	0.001	-8.489	0.0026	26	8.44%	1019.3	3.85%
M02715_3.00:CEBPA:CEBPB:CEBPE	RTTRYGYAAY	0.001	-8.47	0.0027	82	26.62%	4839.1	18.28%
M02983_3.00:MLX	ATCACGTGAT	0.001	-8.46	0.0027	6	1.95%	68.4	0.26%
M00296_3.00:KLF10:KLF11	GGGGGCGG	0.001	-8.46	0.0027	48	15.58%	2416.1	9.13%
M12264_3.00:NR1D2:NR2C1:NR2C2:NR2F1:NR2F2:NR2F6:NR4A1:PPARA:PPARD:PPARG:RARA:RARB:RARG:RORA:RORB:RORC:RXRA:RXRB:RXRG:THRA	AGGTCAG	0.001	-8.46	0.0027	160	51.95%	11053.4	41.75%
M09323_3.00:ZNF813	GAAGGAAGGAGGGRGVV	0.001	-8.45	0.0027	8	2.60%	131.7	0.50%
M05135_3.00:CRX:DMBX1:DPRX:GSC:GSC2:OTX1:OTX2:PITX1:PITX2:PITX3:TPRX1	CTAATCCC	0.001	-8.45	0.0027	74	24.03%	4251.4	16.06%
M08662_3.00:NEUROG2:NEUROG3	CAGATGG	0.001	-8.438	0.0027	46	14.94%	2285	8.63%
M11091_3.00:JUN:JUNB:JUND	NTGAGTCA	0.001	-8.432	0.0027	84	27.27%	4994.3	18.86%
M05006_3.00:ELF1:ELF2:ELF4:ELK1:ELK3:ELK4:ERF:ERG:ETS1:ETS2:ETV1:ETV2:ETV3:ETV3L:ETV4:ETV5:FEV:FLI1:GABPA	GACCGGAAGTR	0.001	-8.43	0.0027	26	8.44%	1023.4	3.87%
M10117_3.00:EGR1:EGR2:EGR3:EGR4	KGYGTGGGYGGGGG	0.001	-8.427	0.0028	20	6.49%	686.4	2.59%
M02494_3.00:ESR1:ESR2:HNF4A:NR1D1:NR1D2:NR1H2:NR1H3:NR1H4:NR2C1:NR2C2:NR2F1:NR2F2:NR2F6:NR4A1:NR4A2:NR4A3:NR5A2:NR6A1:PPARA:PPARD:PPARG:RARA:RARB:RARG:RORA:RORB:RORC:RXRA:RXRB:RXRG	RGGTCANN	0.001	-8.423	0.0028	104	33.77%	6522.9	24.64%
M02504_3.00:ESR1:ESR2:HNF4G:NR1D1:NR1D2:NR1H2:NR1H3:NR1H4:NR2C1:NR2C2:NR2F1:NR2F2:NR2F6:NR6A1:PPARA:PPARD:PPARG:RARA:RARB:RARG:RORA:RORB:RORC:RXRA:RXRB:RXRG	NAGGTCAH	0.001	-8.423	0.0028	104	33.77%	6522.9	24.64%
M02505_3.00:ESR1:ESR2:ESRRA:ESRRB:ESRRG:NR1H2:NR1H3:NR1H4:NR2C1:NR2C2:NR2F1:NR2F2:NR2F6:NR4A1:RARA:RARB:RARG:RORA:RORB:RORC:RXRA:RXRB:RXRG	NAGGTCAH	0.001	-8.423	0.0028	104	33.77%	6522.9	24.64%
M00891_3.00:ESR1:ESR2:NR1D1:NR1D2:NR1H2:NR1H3:NR1H4:NR2C1:NR2C2:NR2F1:NR2F2:NR2F6:NR4A1:NR4A2:NR4A3:NR5A1:NR5A2:NR6A1:PPARA:PPARD:PPARG:RARA:RARB:RARG:RORA:RORB:RORC:RXRA:RXRB:RXRG:THRA:THRB	KRGGTCAMV	0.001	-8.417	0.0028	104	33.77%	6523.9	24.64%
M05267_3.00:ALX1:ALX3:ALX4:ARX:DRGX:EMX1:EMX2:EN1:EN2:ESX1:GBX1:GBX2:GSX1:GSX2:HESX1:HOXA2:HOXA3:HOXB2:HOXB3:HOXD3:ISX:LHX1:LHX2:LHX3:LHX4:LHX5:LHX6:LHX8:LHX9:LMX1A:LMX1B:MIXL1:MNX1:MSX1:MSX2:NOBOX:NOTO:OTP:PDX1:PHOX2A:PHOX2B:PROP1:PRRX1:PRRX2:RAX:RAX2:SEBOX:SHOX:SHOX2:UNCX:VAX1:VAX2:VSX1:VSX2:ZFHX2	STAATTAM	0.001	-8.417	0.0028	60	19.48%	3249.9	12.28%
M03303_3.00:HOXA13:HOXB13:HOXC13:HOXD13	DTTTTACGAGS	0.001	-8.408	0.0028	10	3.25%	207.6	0.78%
M08910_3.00:BORCS8-MEF2B:MEF2A:MEF2B:MEF2C:MEF2D	KCTATTTTTRG	0.001	-8.382	0.0028	56	18.18%	2973.5	11.23%
M01819_3.00:FIGLA	MCAGGTGND	0.001	-8.374	0.0029	114	37.01%	7314.5	27.63%
M06181_3.00:ELF1:ELF2:ELF4:ELK1:ELK3:ELK4:ERF:ERG:ETS1:ETS2:ETV1:ETV2:ETV3:ETV3L:ETV4:ETV5:FEV:FLI1:GABPA	NNNNNACCGGWAGTN	0.001	-8.371	0.0029	10	3.25%	208.1	0.79%
M08597_3.00:NFXL1	YCCTCYCTSTBCYYCTCYYYC	0.001	-8.352	0.0029	12	3.90%	293.7	1.11%
M05346_3.00:ALX1:ALX3:ALX4:ARX:BARHL1:BARHL2:BARX1:BARX2:BSX:DRGX:EMX1:EMX2:EN1:EN2:ESX1:EVX1:EVX2:GBX1:GBX2:GSX1:GSX2:HESX1:HOXA2:HOXA3:HOXB2:HOXB3:HOXD3:ISX:LBX1:LBX2:LHX1:LHX2:LHX3:LHX4:LHX5:LHX6:LHX8:LHX9:LMX1A:LMX1B:MEOX1:MEOX2:MIXL1:MNX1:MSX1:MSX2:NKX1-1:NKX1-2:NOBOX:NOTO:OTP:PDX1:PHOX2A:PHOX2B:PROP1:PRRX1:PRRX2:RAX:RAX2:SEBOX:SHOX:SHOX2:UNCX:VAX1:VAX2:VSX1:VSX2:ZFHX2	YTAATTAN	0.001	-8.329	0.003	48	15.58%	2430.2	9.18%
M05399_3.00:ALX1:ALX3:ALX4:ARX:BARX1:BARX2:BSX:DLX2:DLX3:DLX5:DRGX:EMX1:EMX2:EN1:EN2:ESX1:EVX1:EVX2:GBX1:GBX2:GSX1:GSX2:HESX1:HOXA2:HOXA3:HOXB2:HOXB3:HOXD3:ISX:LBX1:LBX2:LHX1:LHX2:LHX3:LHX4:LHX5:LHX6:LHX8:LHX9:LMX1A:LMX1B:MEOX1:MIXL1:MNX1:MSX1:MSX2:NKX1-1:NKX1-2:NOBOX:NOTO:OTP:PDX1:PHOX2A:PHOX2B:PROP1:PRRX1:PRRX2:RAX:RAX2:SEBOX:SHOX:SHOX2:UNCX:VAX1:VAX2:VSX1:VSX2:ZFHX2:ZFHX3	CTAATTAA	0.001	-8.319	0.003	44	14.29%	2163.7	8.17%
M08329_3.00:CTCF	YGGCCACCAGGKGGC	0.001	-8.317	0.003	4	1.30%	23.8	0.09%
M06832_3.00:PAX1:PAX2:PAX3:PAX5:PAX6:PAX7:PAX8:PAX9	TCACGSTTGRNTGNNKNNB	0.001	-8.314	0.003	6	1.95%	70.7	0.27%
M09999_3.00:KLF1:KLF12:KLF2:KLF3:KLF4:KLF5:KLF6:KLF7:KLF8	GGGGVDGGGCGGGGCYGGG	0.001	-8.305	0.003	8	2.60%	134.8	0.51%
M10105_3.00:KLF1:KLF12:KLF2:KLF3:KLF4:KLF5:KLF6:KLF7:KLF8	GGGGVDGGGCGGGGCYGGG	0.001	-8.305	0.003	8	2.60%	134.8	0.51%
M00726_3.00:BSX:DLX1:DLX2:DLX3:DLX4:DLX5:DLX6:LBX2:LHX1:LHX5:MSX1:MSX2	TTAATTAVBY	0.001	-8.289	0.0031	44	14.29%	2166	8.18%
M01932_3.00:ALX1:ALX3:ALX4:ARX:DRGX:EN1:EN2:ESX1:HESX1:HOXA4:HOXB4:HOXC4:HOXD4:ISX:LBX2:LHX2:LHX3:LHX4:LHX6:LHX8:LHX9:LMX1A:LMX1B:MIXL1:NOBOX:OTP:PHOX2A:PHOX2B:PROP1:PRRX1:PRRX2:RAX:RAX2:SEBOX:SHOX:SHOX2:UNCX:VSX1:VSX2:ZFHX2	NCTAATTAABN	0.001	-8.282	0.0031	22	7.14%	805	3.04%
M10166_3.00:E2F1:E2F2:E2F3:E2F4:E2F5:E2F6	NGGGCGGGAAGG	0.001	-8.263	0.0032	20	6.49%	695.1	2.63%
M12215_3.00:ESR1:ESR2:NR1D1:NR1D2:NR1H2:NR1H3:NR1H4:NR2C1:NR2C2:NR2F1:NR2F2:NR2F6:NR4A1:NR4A2:NR4A3:NR5A1:NR5A2:NR6A1:PPARA:PPARD:PPARG:RARA:RARB:RARG:RORA:RORB:RORC:RXRA:RXRB:RXRG:THRA:THRB	ABANWAANTAGGTCAG	0.001	-8.262	0.0032	10	3.25%	211.1	0.80%
M12209_3.00:NR1H2:NR1H3:NR1H4:NR2C1:NR2C2:NR2F1:NR2F2:NR2F6:RARA:RARB:RARG:RORA:RORB:RORC:RXRA:RXRB:RXRG:VDR	AGGTCAY	0.001	-8.248	0.0032	128	41.56%	8455.5	31.94%
M11254_3.00:MECOM	TATCTTGTC	0.001	-8.245	0.0032	20	6.49%	696.1	2.63%
M04141_3.00:HNF4A:HNF4G:NR2E1:NR2F1:NR2F2:NR2F6:NR6A1:RXRB	TGAMCTTTGGACC	0.001	-8.242	0.0032	6	1.95%	71.4	0.27%
M06525_3.00:FEZF1:FEZF2	YMAAAAGAGCAACCV	0.001	-8.242	0.0032	6	1.95%	71.1	0.27%
M02287_3.00:BARX1:BARX2:BSX:EMX1:EMX2:EN1:EN2:EVX1:EVX2:GSX1:GSX2:HESX1:HMX1:HMX2:HMX3:HOXA1:HOXA2:HOXA3:HOXA4:HOXA5:HOXA7:HOXB1:HOXB2:HOXB3:HOXB4:HOXB5:HOXB7:HOXC4:HOXC5:HOXD1:HOXD3:HOXD4:MEOX1:MEOX2:MNX1:NANOG:NANOGP8:NKX1-1:NKX1-2:NOTO:OTP:PDX1:TLX1:TLX3:VAX1:VAX2:VENTX	NATTAATTACN	0.001	-8.232	0.0032	22	7.14%	808	3.05%
M09514_3.00:ZNF257	GAGGCAAGAGCMR	0.001	-8.226	0.0032	10	3.25%	212.8	0.80%
M01403_3.00:LIN54	AATTYAAAH	0.001	-8.218	0.0033	134	43.51%	8947.2	33.79%
M06011_3.00:EOMES:TBR1:TBX21:TBX5	DAGGTGTGAA	0.001	-8.195	0.0033	38	12.34%	1782.5	6.73%
M06364_3.00:NEUROG2	GTGACATATGG	0.001	-8.175	0.0034	12	3.90%	299.1	1.13%
M04541_3.00:FOS:FOSB:FOSL1:FOSL2	GATGACGTCATC	0.001	-8.172	0.0034	6	1.95%	72.5	0.27%
M01576_3.00:EHF:ELF1:ELF2:ELF3:ELF4:ELF5:ELK1:ELK3:ELK4:ERF:ERG:ETS1:ETS2:ETV1:ETV2:ETV3:ETV3L:ETV4:ETV5:ETV6:ETV7:FEV:FLI1:GABPA:SPDEF	WNCCGGAAGT	0.001	-8.163	0.0034	54	17.53%	2860.2	10.80%
M11359_3.00:GFI1:GFI1B	SAAATCASAG	0.001	-8.159	0.0034	112	36.36%	7194.7	27.18%
M01569_3.00:ELF1:ELF2:ELF4:ELK1:ELK3:ELK4:ERF:ERG:ETS1:ETS2:ETV1:ETV2:ETV3:ETV3L:ETV4:ETV5:FEV:FLI1:GABPA	NACCGGAAGT	0.001	-8.137	0.0035	20	6.49%	702.2	2.65%
M02161_3.00:ALX1:ALX3:ALX4:ARX:BARX1:BARX2:BSX:DLX2:DLX3:DRGX:EMX1:EMX2:EN1:EN2:ESX1:GBX1:GBX2:GSX1:GSX2:HESX1:HOXA2:HOXA3:HOXB2:HOXB3:HOXD3:ISX:LBX2:LHX1:LHX2:LHX3:LHX4:LHX5:LHX6:LHX8:LHX9:LMX1A:LMX1B:MEOX1:MIXL1:MNX1:MSX1:MSX2:NKX1-1:NKX1-2:NOBOX:NOTO:OTP:PDX1:PHOX2A:PHOX2B:PROP1:PRRX1:PRRX2:RAX:RAX2:SEBOX:SHOX:SHOX2:UNCX:VAX1:VAX2:VSX1:VSX2:ZFHX2	NNTTAATTAGN	0.001	-8.133	0.0035	22	7.14%	813.6	3.07%
M05311_3.00:HOXA10:HOXA11:HOXA5:HOXA6:HOXA7:HOXA9:HOXB5:HOXB6:HOXB8:HOXB9:HOXC10:HOXC11:HOXC5:HOXC6:HOXC8:HOXC9:HOXD10:HOXD11:HOXD8:HOXD9	RTTTTACGAC	0.001	-8.119	0.0036	10	3.25%	215.6	0.81%
M09430_3.00:ZNF85	VTGCTGKAATCTCMN	0.001	-8.116	0.0036	8	2.60%	138.6	0.52%
M05099_3.00:ALX1:ALX3:ALX4:ARX:BARHL1:BARHL2:BARX1:BARX2:BSX:DLX1:DLX2:DLX3:DLX4:DLX5:DLX6:DRGX:EMX1:EMX2:EN1:EN2:ESX1:EVX1:EVX2:GBX1:GBX2:GSX1:GSX2:HESX1:HOXA2:HOXA3:HOXB2:HOXB3:HOXD3:ISX:LBX1:LBX2:LHX1:LHX2:LHX3:LHX4:LHX5:LHX6:LHX8:LHX9:LMX1A:LMX1B:MEOX1:MIXL1:MNX1:MSX1:MSX2:NKX1-1:NKX1-2:NOBOX:NOTO:OTP:PDX1:PHOX2A:PHOX2B:PROP1:PRRX1:PRRX2:RAX:RAX2:SEBOX:SHOX:SHOX2:UNCX:VAX1:VAX2:VSX1:VSX2:ZFHX…	CTAATTAA	0.001	-8.105	0.0036	44	14.29%	2185.5	8.25%
M09403_3.00:ZNF229	TTTACTGAAGGTCH	0.001	-8.102	0.0036	6	1.95%	73.1	0.28%
M10247_3.00:GATA1:GATA2:GATA3:GATA4:GATA5:GATA6	TGGSGSRNRSAGATAAGRV	0.001	-8.102	0.0036	6	1.95%	73.5	0.28%
M11784_3.00:CRX:DMBX1:DPRX:GSC:GSC2:OTX1:OTX2:PITX1:PITX2:PITX3:TPRX1	GGATTARAVNY	0.001	-8.097	0.0036	74	24.03%	4301.7	16.25%
M12561_3.00:NFE4	SCCTCAC	0.001	-8.086	0.0037	218	70.78%	16207.8	61.22%
M11403_3.00:EGR1:EGR2:EGR3:EGR4	GTGGGT	0.001	-8.083	0.0037	128	41.56%	8486.7	32.06%
M04069_3.00:ALX1:ALX3:ALX4:ARX:BARX1:BARX2:BSX:DLX2:DLX3:DRGX:EMX1:EMX2:EN1:EN2:ESX1:EVX1:EVX2:GBX1:GBX2:GSX1:GSX2:HESX1:HOXA2:HOXA3:HOXB2:HOXB3:HOXD3:ISX:LBX1:LBX2:LHX1:LHX2:LHX3:LHX4:LHX5:LHX6:LHX8:LHX9:LMX1A:LMX1B:MEOX1:MIXL1:MNX1:MSX1:MSX2:NKX1-1:NKX1-2:NOBOX:NOTO:OTP:PDX1:PHOX2A:PHOX2B:PROP1:PRRX1:PRRX2:RAX:RAX2:SEBOX:SHOX:SHOX2:UNCX:VAX1:VAX2:VSX1:VSX2:ZFHX2	SSTAATTGCG	0.001	-8.06	0.0037	28	9.09%	1168.7	4.41%
M06274_3.00:NFKB1:NFKB2	VGGGRAANYCCCB	0.001	-8.058	0.0037	36	11.69%	1666.5	6.29%
M10492_3.00:RUNX1:RUNX2:RUNX3	KYTGTGGTTT	0.001	-8.046	0.0038	28	9.09%	1169.8	4.42%
M05324_3.00:HOXA10:HOXA11:HOXA9:HOXB9:HOXC10:HOXC11:HOXC12:HOXC9:HOXD10:HOXD11:HOXD12:HOXD9	DTWAMNTTTTACGACC	0.001	-8.033	0.0038	4	1.30%	25.8	0.10%
M10766_3.00:STAT6	TTCYYRRGAAVT	0.001	-8.017	0.0039	18	5.84%	601	2.27%
M00558_3.00:ALX1:ALX3:ALX4:ARX:BARHL1:BARHL2:BARX1:BARX2:BSX:DLX1:DLX2:DLX3:DLX4:DLX5:DLX6:DRGX:EMX1:EMX2:EN1:EN2:ESX1:EVX1:EVX2:GBX1:GBX2:GSX1:GSX2:HESX1:HMX1:HMX3:HOXA1:HOXA2:HOXA3:HOXA4:HOXA5:HOXB1:HOXB2:HOXB3:HOXB4:HOXB5:HOXC4:HOXC5:HOXD1:HOXD3:HOXD4:ISX:MEOX1:MEOX2:MIXL1:MNX1:MSX1:MSX2:NKX1-1:NKX1-2:NOTO:OTP:PDX1:PHOX2A:PHOX2B:PROP1:PRRX1:PRRX2:RAX:RAX2:SEBOX:SHOX:SHOX2:TLX1:TLX2:TLX3:UNCX:V…	NNTAATTRN	0.001	-8.005	0.0039	164	53.25%	11482.2	43.37%
M02292_3.00:HMX1:HMX2:HMX3:HOXA4:HOXB4:HOXC4:HOXD4:TLX1:TLX2:TLX3:VAX1:VAX2:VENTX	RRVTACTTAA	0.001	-8.004	0.0039	46	14.94%	2330	8.80%
M06651_3.00:ALX1:ALX3:ALX4:ARX:BARX1:BARX2:BSX:DLX1:DLX2:DLX3:DLX4:DLX5:DLX6:DRGX:EMX1:EMX2:EN1:EN2:ESX1:EVX1:EVX2:GBX1:GBX2:GSX1:GSX2:HESX1:HMX1:HMX3:HOXA1:HOXA2:HOXA3:HOXA4:HOXA5:HOXB1:HOXB2:HOXB3:HOXB4:HOXB5:HOXC4:HOXC5:HOXD1:HOXD3:HOXD4:ISX:LBX1:LBX2:LHX2:LHX3:LHX4:LHX6:LHX8:LHX9:LMX1A:LMX1B:MEOX1:MIXL1:MNX1:MSX1:MSX2:NKX1-1:NKX1-2:NOBOX:NOTO:OTP:PDX1:PHOX2A:PHOX2B:PROP1:PRRX1:PRRX2:RAX:RAX2:…	TCTAATTA	0.001	-8.002	0.0039	32	10.39%	1418.9	5.36%
M08608_3.00:ZNF281	GRGGTGGGGGAGGGG	0.001	-7.997	0.0039	18	5.84%	602.1	2.27%
M01739_3.00:ARID5A:ARID5B	YAATATBD	0.001	-7.974	0.004	184	59.74%	13205.9	49.88%
M05994_3.00:SOX1:SOX10:SOX11:SOX12:SOX13:SOX14:SOX15:SOX17:SOX18:SOX2:SOX21:SOX3:SOX30:SOX4:SOX5:SOX6:SOX7:SOX8:SOX9:SRY	CATTGTTCGGT	0.001	-7.974	0.004	12	3.90%	306.9	1.16%
M10658_3.00:ELF1:ELF2:ELF4:ELK1:ELK3:ELK4:ERF:ERG:ETS1:ETS2:ETV1:ETV2:ETV3:ETV3L:ETV4:ETV5:FEV:FLI1:GABPA	RACCGGAAGT	0.001	-7.959	0.0041	18	5.84%	604	2.28%
M02183_3.00:ALX1:ALX3:ALX4:ARX:DRGX:EMX1:EMX2:EN1:EN2:ESX1:GBX1:GBX2:GSX1:GSX2:HOXA1:HOXA2:HOXA3:HOXA4:HOXA5:HOXB1:HOXB2:HOXB3:HOXB4:HOXB5:HOXC4:HOXC5:HOXD3:HOXD4:ISL1:ISL2:ISX:LHX2:LHX3:LHX4:LHX9:MNX1:NKX1-1:NKX1-2:NOTO:OTP:PDX1:PHOX2A:PHOX2B:PROP1:PRRX1:PRRX2:RAX:RAX2:SEBOX:SHOX:SHOX2:UNCX:VAX1:VAX2:VSX1:VSX2	NYTAATTARN	0.001	-7.955	0.0041	102	33.12%	6446.3	24.35%
M05152_3.00:RHOXF1	YTGATCCC	0.001	-7.952	0.0041	124	40.26%	8188.3	30.93%
M09914_3.00:ATF1:CREB1:CREM	TGACGTCAYYN	0.001	-7.94	0.0041	18	5.84%	605.9	2.29%
M09947_3.00:ATF1:CREB1:CREM	TGACGTCAYYN	0.001	-7.94	0.0041	18	5.84%	605.9	2.29%
M03964_3.00:GATA1:GATA2:GATA3:GATA4:GATA5:GATA6	SWGATAASG	0.001	-7.939	0.0041	42	13.64%	2069.7	7.82%
M00837_3.00:ZNF263	GGGAGSAC	0.001	-7.934	0.0041	64	20.78%	3596.1	13.58%
M11596_3.00:ELF5:SPI1:SPIB:SPIC	AGAGGAAG	0.001	-7.927	0.0042	70	22.73%	4032.2	15.23%
M02503_3.00:HNF4A:HNF4G:NR2E1	VDGTCANNN	0.001	-7.921	0.0042	270	87.66%	21222.9	80.16%
M11344_3.00:ZNF740	TGGGGATCCCCC	0.001	-7.899	0.0043	4	1.30%	26.1	0.10%
M01763_3.00:ASH1L:HMGA1:HMGA2:SETBP1:SRCAP	WWWHDHDWWW	0.001	-7.898	0.0043	194	62.99%	14096.1	53.24%
M05648_3.00:POU2F2	BCATTATSVTAATGM	0.001	-7.89	0.0043	8	2.60%	143.3	0.54%
M02267_3.00:MEIS1:MEIS2:MEIS3:PKNOX1:PKNOX2:TGIF1:TGIF2	ANCTGTCAN	0.001	-7.88	0.0043	132	42.86%	8849.6	33.43%
M06469_3.00:EGR1:EGR2:EGR3:EGR4	KKGCGTGGGCGKDN	0.001	-7.875	0.0043	20	6.49%	718	2.71%
M02488_3.00:NR1D1:NR1D2:NR1H2:NR1H3:NR1H4:NR2C1:NR2C2:NR2F1:NR2F2:NR2F6:NR4A1:NR4A2:NR4A3:NR5A1:NR5A2:NR6A1:PPARA:PPARD:PPARG:RARA:RARB:RARG:RORA:RORB:RORC:RXRA:RXRB:RXRG:THRA:THRB	SAGGTCAN	0.001	-7.863	0.0044	104	33.77%	6618.3	25.00%
M06254_3.00:GATA1:GATA2:GATA3:GATA4:GATA5:GATA6	GATAAS	0.001	-7.854	0.0044	156	50.65%	10838	40.94%
M00342_3.00:ALX1:ALX3:ALX4:ARX:BARX1:BARX2:BSX:DLX1:DLX2:DLX3:DLX4:DLX5:DLX6:DRGX:EMX1:EMX2:EN1:EN2:ESX1:EVX1:EVX2:GBX1:GBX2:GSX1:GSX2:HESX1:HOXA2:HOXA3:HOXB2:HOXB3:HOXD3:ISX:LBX1:LBX2:LHX1:LHX2:LHX3:LHX4:LHX5:LHX6:LHX8:LHX9:LMX1A:LMX1B:MEOX1:MIXL1:MNX1:MSX1:MSX2:NKX1-1:NKX1-2:NOBOX:NOTO:OTP:PDX1:PHOX2A:PHOX2B:PROP1:PRRX1:PRRX2:RAX:RAX2:SEBOX:SHOX:SHOX2:UNCX:VAX1:VAX2:VSX1:VSX2:ZFHX2:ZFHX3	NCTAATTAAN	0.001	-7.844	0.0045	22	7.14%	831.2	3.14%
M02204_3.00:CRX:DMBX1:GSC:OTX1:OTX2:TPRX1	MTAATCCV	0.001	-7.835	0.0045	78	25.32%	4636.7	17.51%
M05132_3.00:CRX:DMBX1:DPRX:GSC:GSC2:OTX1:OTX2:PITX1:PITX2:PITX3:TPRX1	CTAATCCC	0.001	-7.835	0.0045	78	25.32%	4636.7	17.51%
M05434_3.00:CRX:DMBX1:DPRX:GSC:GSC2:OTX1:OTX2:PITX1:PITX2:PITX3:TPRX1	CTAATCCC	0.001	-7.835	0.0045	78	25.32%	4636.7	17.51%
M08885_3.00:CRX:DMBX1:DPRX:GSC:GSC2:OTX1:OTX2:PITX1:PITX2:PITX3:TPRX1	TAATCCC	0.001	-7.835	0.0045	78	25.32%	4636.7	17.51%
M09996_3.00:SP1:SP3:SP4:SP8:SP9	GGGAAGGGGGCGGGGCCDGR	0.001	-7.835	0.0045	6	1.95%	77.6	0.29%
M10098_3.00:SP1:SP3:SP4:SP5:SP8:SP9	GGGAAGGGGGCGGGGCCDGR	0.001	-7.835	0.0045	6	1.95%	77.6	0.29%
M00479_3.00:ALX1:ALX3:ALX4:ARX:DRGX:ESX1:GBX1:GBX2:ISX:MIXL1:OTP:PHOX2A:PHOX2B:PROP1:PRRX1:PRRX2:RAX:RAX2:SEBOX:SHOX:SHOX2:UNCX:VSX1:VSX2	NYTAATTA	0.001	-7.8	0.0046	122	39.61%	8056.9	30.43%
M09238_3.00:ZNF729	TTKWTKTKTBTGTDTKTGTBHH	0.001	-7.796	0.0046	48	15.58%	2489.2	9.40%
M05085_3.00:GCM1:GCM2	YACCCGCAT	0.001	-7.789	0.0047	18	5.84%	613.6	2.32%
M03309_3.00:BARHL1:BARHL2:BARX1:BARX2:BSX:DLX2:DLX3:EMX1:EMX2:ESX1:EVX1:EVX2:GBX1:GBX2:HESX1:HMX1:HMX2:HMX3:HOXA1:HOXA2:HOXA3:HOXA4:HOXA5:HOXB1:HOXB2:HOXB3:HOXB4:HOXB5:HOXC4:HOXC5:HOXD1:HOXD12:HOXD3:HOXD4:LBX1:LBX2:MEOX1:MEOX2:MNX1:MSX1:MSX2:NANOG:NANOGP8:NKX1-1:NKX1-2:PDX1:RAX:RAX2:TLX1:TLX3:VENTX	TTAATGATGATKAS	0.001	-7.77	0.0047	6	1.95%	78.1	0.30%
M02868_3.00:CRX:DMBX1:DPRX:GSC:GSC2:OTX1:OTX2:PITX1:PITX2:PITX3:TPRX1	YTAATCCC	0.001	-7.77	0.0047	78	25.32%	4646.8	17.55%
M00424_3.00:NR2E3	MGGGATCAAN	0.001	-7.768	0.0047	30	9.74%	1313	4.96%
M01169_3.00:LIN54	DTTTRAAWTW	0.001	-7.768	0.0047	86	27.92%	5248.5	19.82%
M10941_3.00:AHR	VYVBWSNCACGCAASBC	0.001	-7.758	0.0048	8	2.60%	146.6	0.55%
M08399_3.00:E2F1:E2F2:E2F3:E2F4:E2F5:E2F6	NGGGCGGGAAR	0.001	-7.739	0.0049	20	6.49%	725.4	2.74%
M08559_3.00:ZNF600	TGTTCTGGARB	0.001	-7.733	0.0049	36	11.69%	1696.8	6.41%
M04542_3.00:FOS:FOSB:FOSL1:FOSL2	CGTGTCATT	0.001	-7.705	0.005	20	6.49%	727	2.75%
M00885_3.00:HNF4A:HNF4G:NR2E1	NRAGTCANNN	0.001	-7.685	0.0051	248	80.52%	19092.1	72.11%
M06113_3.00:ZBED4	AHYNGRACCRNN	0.001	-7.669	0.0052	52	16.88%	2780.5	10.50%
M11062_3.00:ATF2	VVVTGACGTMAD	0.001	-7.667	0.0052	46	14.94%	2367.9	8.94%
M12559_3.00:PURA	CHCTGBCCC	0.001	-7.665	0.0052	184	59.74%	13270.6	50.12%
M00408_3.00:PAX3:PAX7	NNSVATTAN	0.001	-7.66	0.0052	228	74.03%	17213.3	65.02%
M04959_3.00:ELF1:ELF2:ELF4:ELK1:ELK3:ELK4:ERF:ERG:ETS1:ETS2:ETV1:ETV2:ETV3:ETV3L:ETV4:ETV5:FEV:FLI1:GABPA	NRSCGGAAGTR	0.001	-7.658	0.0052	40	12.99%	1965.3	7.42%
M00844_3.00:MZF1	KGGGGATY	0.001	-7.651	0.0052	34	11.04%	1575.7	5.95%
M06184_3.00:LEUTX:TPRX1	NNNWNNGGATTA	0.001	-7.649	0.0053	110	35.71%	7128.3	26.92%
M02475_3.00:ESR1:ESR2:HNF4A:HNF4G:NR1D1:NR1D2:NR1H2:NR1H3:NR1H4:NR2C1:NR2C2:NR2F1:NR2F2:NR2F6:NR4A1:NR4A2:NR4A3:NR5A2:NR6A1:PPARA:PPARD:PPARG:RARA:RARB:RARG:RORA:RORB:RORC:RXRA:RXRB:RXRG:THRA:THRB	NRAGGTCAN	0.001	-7.644	0.0053	108	35.06%	6971.5	26.33%
M12273_3.00:NR1H3:NR2F1:NR2F2:NR2F6:PPARD:RORA:RORB:RORC:RXRA:RXRG:THRA:THRB	RGGKSAGSBGAGGTCAG	0.001	-7.626	0.0054	22	7.14%	845.1	3.19%
M05151_3.00:RHOXF1	YTGATCCC	0.001	-7.62	0.0054	130	42.21%	8737.3	33.00%
M04488_3.00:JUN:JUNB:JUND	SATGAGTCATS	0.001	-7.616	0.0054	12	3.90%	319.2	1.21%
M01567_3.00:ELF1:ELF2:ELF4:ELK1:ELK3:ELK4:ERF:ERG:ETS1:ETS2:ETV1:ETV2:ETV3:ETV3L:ETV4:ETV5:FEV:FLI1:GABPA	ACCGGAAGT	0.001	-7.605	0.0055	20	6.49%	733.8	2.77%
M03095_3.00:ZNF740	GTGGGGGGGG	0.001	-7.595	0.0055	22	7.14%	847.5	3.20%
M02203_3.00:ALX1:ALX3:ALX4:ARX:DRGX:EN1:EN2:ESX1:ISX:LHX2:LHX3:LHX4:LHX6:LHX8:LHX9:LMX1A:LMX1B:MIXL1:NOBOX:OTP:PHOX2A:PHOX2B:PROP1:PRRX1:PRRX2:RAX:RAX2:SEBOX:SHOX:SHOX2:UNCX:VSX1:VSX2:ZFHX2	NYTAATTARN	0.001	-7.593	0.0055	32	10.39%	1453.7	5.49%
M10391_3.00:HNF4A:HNF4G:NR2E1:NR2F1:NR2F2:NR2F6:NR6A1:RXRB:RXRG	RRGKBCAAAGTCCA	0.001	-7.582	0.0056	6	1.95%	81.4	0.31%
M02300_3.00:HOXC12:HOXD12	WATTAATTATN	0.001	-7.578	0.0056	48	15.58%	2514.9	9.50%
M10770_3.00:EOMES:TBR1:TBX21:TBX5	AGGTGTTAAT	0.001	-7.572	0.0056	20	6.49%	735	2.78%
M02580_3.00:EOMES:TBX2:TBX20:TBX3:TBX4:TBX5	AGGTGTBA	0.001	-7.565	0.0056	42	13.64%	2109	7.97%
M12497_3.00:EOMES:TBX2:TBX20:TBX3:TBX4:TBX5	DDAGGTGTBANA	0.001	-7.563	0.0056	34	11.04%	1583.7	5.98%
M10154_3.00:E2F1:E2F2:E2F3:E2F4:E2F5:E2F6	WDGGCGGGAAA	0.001	-7.558	0.0057	24	7.79%	966.7	3.65%
M08276_3.00:JUN:JUNB:JUND	RRGRTKRMGTCATCV	0.001	-7.546	0.0057	10	3.25%	232.5	0.88%
M10131_3.00:KLF1:KLF12:KLF2:KLF3:KLF4:KLF5:KLF6:KLF7	DGGGYGKGGCYGGG	0.001	-7.539	0.0057	20	6.49%	737.8	2.79%
M05631_3.00:PAX3:PAX7	HTAATCAATTAN	0.001	-7.525	0.0058	4	1.30%	29.5	0.11%
M12031_3.00:MEF2A	VKTWCCAWATATAGWAAN	0.001	-7.525	0.0058	4	1.30%	29.4	0.11%
M11317_3.00:EGR1:EGR2:EGR3:EGR4	RCGCACGCA	0.001	-7.524	0.0058	14	4.55%	419.4	1.58%
M08282_3.00:ATF3:JDP2	GTCACGTGACC	0.001	-7.521	0.0058	6	1.95%	82.2	0.31%
M10958_3.00:MAX	RRAHCACGTGDTYY	0.001	-7.521	0.0058	6	1.95%	82.2	0.31%
M10990_3.00:USF1:USF2	RGRYCACGTGRYCY	0.001	-7.521	0.0058	6	1.95%	82.1	0.31%
M01904_3.00:JUN:JUNB:JUND	DTGAGTCAT	0.001	-7.515	0.0058	18	5.84%	628.1	2.37%
M09945_3.00:DDIT3	ATTKCATCAK	0.001	-7.506	0.0059	20	6.49%	739.3	2.79%
M12475_3.00:STAT1	TCCDGGAAR	0.001	-7.494	0.0059	26	8.44%	1090.1	4.12%
M03247_3.00:FOXC1:FOXC2:FOXD1:FOXD2:FOXD3:FOXD4:FOXD4L1:FOXD4L3:FOXD4L4:FOXD4L5:FOXD4L6:FOXE1:FOXE3:FOXF1:FOXF2:FOXG1:FOXI1:FOXI3:FOXJ3:FOXL1:FOXL2:FOXS1	TGTTTAC	0.001	-7.492	0.0059	94	30.52%	5906.7	22.31%
M10457_3.00:ESR1:ESR2:HNF4A:HNF4G:NR1D1:NR1D2:NR1H2:NR1H3:NR1H4:NR2C1:NR2C2:NR2F1:NR2F2:NR2F6:NR4A1:NR4A2:NR4A3:NR5A2:NR6A1:PPARA:PPARD:PPARG:RARA:RARB:RARG:RORA:RORB:RORC:RXRA:RXRB:RXRG:THRA:THRB	CAAAGGTCA	0.001	-7.49	0.006	38	12.34%	1851	6.99%
M00611_3.00:ALX1:ALX3:ALX4:ARX:BARHL1:BARHL2:BARX1:BARX2:BSX:DLX1:DLX2:DLX3:DLX4:DLX5:DLX6:DRGX:EMX1:EMX2:EN1:EN2:ESX1:EVX1:EVX2:GBX1:GBX2:GSX1:GSX2:HESX1:HOXA1:HOXA2:HOXA3:HOXA4:HOXA5:HOXB1:HOXB2:HOXB3:HOXB4:HOXB5:HOXC4:HOXC5:HOXD1:HOXD3:HOXD4:ISX:LHX1:LHX3:LHX4:LHX5:MEOX1:MEOX2:MIXL1:MNX1:MSX1:MSX2:NANOG:NANOGP8:NKX1-1:NKX1-2:NOTO:OTP:PDX1:PHOX2A:PHOX2B:PROP1:PRRX1:PRRX2:RAX:RAX2:SEBOX:SHOX:SHO…	NCTAATTACN	0.001	-7.489	0.006	22	7.14%	854.9	3.23%
M06216_3.00:FBXL19:KDM2A:KDM2B	NNNNNNNNTVCG	0.001	-7.488	0.006	258	83.77%	20101.1	75.92%
M08979_3.00:BACH1:BACH2	AAHTGCTGA	0.001	-7.487	0.006	24	7.79%	971.6	3.67%
M10931_3.00:HIF1A	BGCACGTVS	0.001	-7.449	0.0062	52	16.88%	2807.3	10.60%
M00501_3.00:ALX1:ALX3:ALX4:ARX:BARHL1:BARHL2:BARX1:BARX2:BSX:DLX1:DLX2:DLX3:DLX4:DLX5:DLX6:DRGX:EMX1:EMX2:EN1:EN2:ESX1:EVX1:EVX2:GBX1:GBX2:GSX1:GSX2:HMX1:HMX2:HMX3:HOXA1:HOXA2:HOXA3:HOXA4:HOXA5:HOXA6:HOXA7:HOXB1:HOXB2:HOXB3:HOXB4:HOXB5:HOXB6:HOXB7:HOXB8:HOXC4:HOXC5:HOXC6:HOXD1:HOXD3:HOXD4:HOXD8:ISX:LHX3:LHX4:MEOX1:MEOX2:MIXL1:MNX1:MSX1:MSX2:NANOG:NANOGP8:NKX1-1:NKX1-2:NOBOX:NOTO:OTP:PDX1:PHOX2A:P…	NTAATKRN	0.001	-7.445	0.0062	202	65.58%	14901.9	56.29%
M09196_3.00:ZNF696	NKGGGCTGGTGVTGCY	0.001	-7.444	0.0062	22	7.14%	857.5	3.24%
M06823_3.00:ESR1:ESR2:NR1D1:NR1D2:NR1H2:NR1H3:NR2C1:NR2C2:NR2F1:NR2F2:NR2F6:NR4A1:NR5A2:NR6A1:PPARA:PPARD:PPARG:RARA:RARB:RARG:RORA:RORB:RORC:RXRA:RXRB:RXRG:THRA:THRB	AGGTCA	0.001	-7.443	0.0062	108	35.06%	7008.2	26.47%
M10915_3.00:TCF12:TCF3:TCF4	GGMCASCTGCNGV	0.001	-7.44	0.0062	38	12.34%	1855.5	7.01%
M06746_3.00:ALX1:ALX3:ALX4:ARX:BARX1:BARX2:BSX:DLX2:DLX3:DRGX:EMX1:EMX2:EN1:EN2:ESX1:EVX1:EVX2:GBX1:GBX2:GSX1:GSX2:HESX1:HOXA2:HOXA3:HOXB2:HOXB3:HOXD3:ISX:LBX1:LBX2:LHX1:LHX2:LHX3:LHX4:LHX5:LHX6:LHX8:LHX9:LMX1A:LMX1B:MEOX1:MIXL1:MNX1:MSX1:MSX2:NKX1-1:NKX1-2:NOBOX:NOTO:OTP:PDX1:PHOX2A:PHOX2B:PROP1:PRRX1:PRRX2:RAX:RAX2:SEBOX:SHOX:SHOX2:UNCX:VAX1:VAX2:VSX1:VSX2:ZFHX2	ACTAATTA	0.001	-7.426	0.0063	44	14.29%	2258.3	8.53%
M05058_3.00:FOXC1:FOXC2:FOXD1:FOXD2:FOXD3:FOXD4:FOXD4L1:FOXD4L3:FOXD4L4:FOXD4L5:FOXD4L6:FOXE1:FOXE3:FOXF1:FOXF2:FOXG1:FOXI1:FOXI3:FOXJ3:FOXL1:FOXL2:FOXS1	WTGTTTACRTARC	0.001	-7.401	0.0064	6	1.95%	84.4	0.32%
M00332_3.00:PBX1:PBX2:PBX3:PBX4	NBNYRTCAWN	0.001	-7.394	0.0065	276	89.61%	21932.7	82.84%
M10650_3.00:EBF1:EBF2:EBF3:EBF4	TCCCYRGGGACH	0.001	-7.389	0.0065	14	4.55%	425.3	1.61%
M10090_3.00:ZBTB17	GGSGGHGGGGGAGGGGMGG	0.001	-7.382	0.0065	8	2.60%	155.9	0.59%
M11822_3.00:ALX1:ALX3:ALX4:ARX:BARHL1:BARHL2:BARX1:BARX2:BSX:DLX1:DLX2:DLX3:DLX4:DLX5:DLX6:DRGX:EMX1:EMX2:EN1:EN2:ESX1:EVX1:EVX2:GBX1:GBX2:GSX1:GSX2:HMX1:HMX2:HMX3:HOXA1:HOXA2:HOXA3:HOXA4:HOXA5:HOXA6:HOXA7:HOXB1:HOXB2:HOXB3:HOXB4:HOXB5:HOXB6:HOXB7:HOXB8:HOXC4:HOXC5:HOXC6:HOXD1:HOXD3:HOXD4:HOXD8:ISX:LHX3:LHX4:MEOX1:MEOX2:MIXL1:MNX1:MSX1:MSX2:NANOG:NANOGP8:NKX1-1:NKX1-2:NOBOX:NOTO:OTP:PDX1:PHOX2A:P…	MRCTAATTAS	0.001	-7.35	0.0067	26	8.44%	1101	4.16%
M01998_3.00:FBXL19:KDM2A:KDM2B	NNTACGNN	0.001	-7.346	0.0067	150	48.70%	10441.7	39.44%
M10736_3.00:ESR1:ESR2:NR1D1:NR1D2:NR1H2:NR1H3:NR1H4:NR2C1:NR2C2:NR2F1:NR2F2:NR2F6:NR4A1:NR4A2:NR4A3:NR5A2:NR6A1:PPARA:PPARD:PPARG:RARA:RARB:RARG:RORA:RORB:RORC:RXRA:RXRB:RXRG	AGGTCAAGGTCA	0.001	-7.343	0.0068	6	1.95%	85.6	0.32%
M06103_3.00:EHF:ELF1:ELF2:ELF3:ELF4:ELF5:ETV6:ETV7	AASCAGGAAGTRRARR	0.001	-7.342	0.0068	8	2.60%	156.7	0.59%
M04773_3.00:HIC1	GGTTGGCAYR	0.001	-7.336	0.0068	52	16.88%	2821	10.66%
M05467_3.00:ALX1:ALX3:ALX4:ARX:BARX1:BARX2:BSX:DLX2:DLX3:DRGX:EMX1:EMX2:EN1:EN2:ESX1:EVX1:EVX2:GBX1:GBX2:GSX1:GSX2:HESX1:HOXA2:HOXA3:HOXB2:HOXB3:HOXD3:ISX:LBX1:LBX2:LHX1:LHX2:LHX3:LHX4:LHX5:LHX6:LHX8:LHX9:LMX1A:LMX1B:MEOX1:MIXL1:MNX1:MSX1:MSX2:NKX1-1:NKX1-2:NOBOX:NOTO:OTP:PDX1:PHOX2A:PHOX2B:PROP1:PRRX1:PRRX2:RAX:RAX2:SEBOX:SHOX:SHOX2:UNCX:VAX1:VAX2:VSX1:VSX2:ZFHX2	CTAATTAR	0.001	-7.334	0.0068	32	10.39%	1476.1	5.58%
M00213_3.00:EHF:ELF1:ELF2:ELF3:ELF4:ELF5:ETV6:ETV7:FEV	ANSCGGAAGT	0.001	-7.303	0.007	54	17.53%	2966.8	11.21%
M10607_3.00:BACH1:BACH2	TGACTCAGCA	0.001	-7.303	0.007	12	3.90%	331.7	1.25%
M01089_3.00:FOXN2:FOXN3	WRGCGTCNH	0.001	-7.302	0.007	120	38.96%	7991.3	30.18%
M09280_3.00:ZNF700	GAAGCGGTHCYTR	0.001	-7.302	0.007	8	2.60%	158	0.60%
M01563_3.00:ELF1:ELF2:ELF4:ELK1:ELK3:ELK4:ERF:ERG:ETS1:ETS2:ETV1:ETV2:ETV3:ETV3L:ETV4:ETV5:FEV:FLI1:GABPA	NRCCGGAAGT	0.001	-7.295	0.007	22	7.14%	867.4	3.28%
M09937_3.00:FOS:FOSB:FOSL1:FOSL2	VTGACTCAB	0.001	-7.199	0.0077	40	12.99%	2013.9	7.61%
M11217_3.00:ZEB1:ZEB2	TCACCTG	0.001	-7.197	0.0077	108	35.06%	7054	26.64%
M11586_3.00:EBF1	VAATTCCCCTGRGA	0.001	-7.193	0.0078	14	4.55%	434.7	1.64%
M01890_3.00:ATF2:CREB5	TKACGTCATN	0.001	-7.19	0.0078	40	12.99%	2014.7	7.61%
M11566_3.00:E2F7:E2F8	TGGCGGG	0.001	-7.189	0.0078	56	18.18%	3123.4	11.80%
M00316_3.00:ALX1:ALX3:ALX4:ARX:BARHL1:BARHL2:BARX1:BARX2:BSX:DLX1:DLX2:DLX3:DLX4:DLX5:DLX6:DRGX:EMX1:EMX2:EN1:EN2:ESX1:EVX1:EVX2:GBX1:GBX2:GSX1:GSX2:HESX1:HOXA2:HOXA3:HOXB2:HOXB3:HOXD3:ISX:LBX1:LBX2:LHX1:LHX2:LHX3:LHX4:LHX5:LHX6:LHX8:LHX9:LMX1A:LMX1B:MEOX1:MIXL1:MNX1:MSX1:MSX2:NKX1-1:NKX1-2:NOBOX:NOTO:OTP:PDX1:PHOX2A:PHOX2B:PROP1:PRRX1:PRRX2:RAX:RAX2:SEBOX:SHOX:SHOX2:UNCX:VAX1:VAX2:VSX1:VSX2:ZFHX…	NNTAATKVR	0.001	-7.184	0.0078	164	53.25%	11656	44.03%
M04766_3.00:ZNF449	GGTTGGGCKT	0.001	-7.178	0.0078	22	7.14%	875.7	3.31%
M02172_3.00:ALX1:ALX3:ALX4:ARX:BARHL1:BARHL2:DRGX:ESX1:EVX1:EVX2:GBX1:GBX2:HESX1:LBX1:LBX2:MEOX1:MEOX2:MIXL1:MSX1:MSX2:PHOX2A:PHOX2B:PROP1:PRRX1:PRRX2:RAX:RAX2:SHOX:SHOX2:TLX1:TLX3:UNCX:VSX1:VSX2	TTAATTAG	0.001	-7.171	0.0079	40	12.99%	2017	7.62%
M09126_3.00:ZNF606	GAGGAAACCGCTCCYKC	0.001	-7.158	0.008	2	0.65%	2.5	0.01%
M04936_3.00:ELF1:ELF2:ELF4:ELK1:ELK3:ELK4:ERF:ERG:ETS1:ETS2:ETV1:ETV2:ETV3:ETV3L:ETV4:ETV5:FEV:FLI1:GABPA	NRCCGGAAGTR	0.001	-7.143	0.0081	10	3.25%	245.9	0.93%
M08262_3.00:MYC	NGCCACGTGST	0.001	-7.135	0.0081	16	5.19%	541.7	2.05%
M05228_3.00:CRX:DMBX1:DPRX:GSC:GSC2:OTX1:OTX2:PITX1:PITX2:PITX3:TPRX1	HTAATCCSYH	0.001	-7.135	0.0081	74	24.03%	4447	16.80%
M00275_3.00:SNAI2	RCAGGTGS	0.001	-7.118	0.0082	96	31.17%	6127.9	23.15%
M00857_3.00:ZNF32	TATATATAT	0.001	-7.104	0.0084	32	10.39%	1497.9	5.66%
M11216_3.00:ZEB1:ZEB2	HYTCACCTKAR	0.001	-7.096	0.0084	72	23.38%	4303.4	16.25%
M03376_3.00:ALX1:ALX3:ALX4:ARX:BARX1:BARX2:BSX:DLX2:DLX3:DLX5:DRGX:EMX1:EMX2:EN1:EN2:ESX1:EVX1:EVX2:GBX1:GBX2:GSX1:GSX2:HESX1:HOXA2:HOXA3:HOXB2:HOXB3:HOXD3:ISX:LBX1:LBX2:LHX1:LHX2:LHX3:LHX4:LHX5:LHX6:LHX8:LHX9:LMX1A:LMX1B:MEOX1:MIXL1:MNX1:MSX1:MSX2:NKX1-1:NKX1-2:NOBOX:NOTO:OTP:PDX1:PHOX2A:PHOX2B:PROP1:PRRX1:PRRX2:RAX:RAX2:SEBOX:SHOX:SHOX2:UNCX:VAX1:VAX2:VSX1:VSX2:ZFHX2:ZFHX3	GYTAATTAGC	0.001	-7.093	0.0084	32	10.39%	1498	5.66%
M08549_3.00:ZNF366	GGAWGGATGGA	0.001	-7.085	0.0085	36	11.69%	1759.9	6.65%
M01894_3.00:CREB3L1:CREB3L2:CREB3L4	ACACGTGGC	0.001	-7.084	0.0085	10	3.25%	247.6	0.94%
M09264_3.00:ZNF729	SVRRGGMRGGAACCTGCNGCN	0.001	-7.082	0.0085	4	1.30%	34	0.13%
M09298_3.00:ZNF665	TAAGGARGTTTYBAATTCW	0.001	-7.082	0.0085	4	1.30%	33.6	0.13%
M11083_3.00:NFE2:NFE2L1:NFE2L2:NFE2L3	CTGAGTCAT	0.001	-7.065	0.0086	14	4.55%	440.6	1.66%
M05154_3.00:CRX:DMBX1:DPRX:GSC:GSC2:OTX1:OTX2:PITX1:PITX2:PITX3:TPRX1	CTAATCCC	0.001	-7.06	0.0086	78	25.32%	4758.1	17.97%
M05433_3.00:CRX:DMBX1:DPRX:GSC:GSC2:OTX1:OTX2:PITX1:PITX2:PITX3:TPRX1	STAATCCN	0.001	-7.04	0.0088	118	38.31%	7882.9	29.77%
M12410_3.00:SMAD1:SMAD3:SMAD5:SMAD9	BGGCAGACA	0.001	-7.031	0.0089	90	29.22%	5678.8	21.45%
M05348_3.00:ALX1:ALX3:ALX4:ARX:BARHL1:BARHL2:BARX1:BARX2:BSX:DRGX:EMX1:EMX2:EN1:EN2:ESX1:EVX1:EVX2:GBX1:GBX2:GSX1:GSX2:HESX1:HOXA2:HOXA3:HOXB2:HOXB3:HOXD3:ISX:LBX1:LBX2:LHX1:LHX2:LHX3:LHX4:LHX5:LHX6:LHX8:LHX9:LMX1A:LMX1B:MEOX1:MEOX2:MIXL1:MNX1:MSX1:MSX2:NKX1-1:NKX1-2:NOBOX:NOTO:OTP:PDX1:PHOX2A:PHOX2B:PROP1:PRRX1:PRRX2:RAX:RAX2:SEBOX:SHOX:SHOX2:UNCX:VAX1:VAX2:VSX1:VSX2:ZFHX2	CTAATTAN	0.001	-7.018	0.009	48	15.58%	2581.5	9.75%
M00297_3.00:KLF10:KLF11	GGGGGCGG	0.001	-7.009	0.0091	42	13.64%	2169.8	8.20%
M10238_3.00:GATA1:GATA2:GATA3:GATA4:GATA5:GATA6	CTGKNNRDNVSAGATAAGR	0.001	-7.006	0.0091	6	1.95%	92	0.35%
M05435_3.00:CRX:DMBX1:DPRX:GSC:GSC2:OTX1:OTX2:PITX1:PITX2:PITX3:TPRX1	NTAATCCC	0.001	-7.005	0.0091	82	26.62%	5070.2	19.15%
M05153_3.00:CRX:DMBX1:DPRX:GSC:GSC2:OTX1:OTX2:PITX1:PITX2:PITX3:TPRX1	CTAATCCS	0.001	-6.987	0.0092	82	26.62%	5073.6	19.16%
M05509_3.00:ALX1:ALX3:ALX4:ARX:BARX1:BARX2:BSX:DLX1:DLX2:DLX3:DLX4:DLX5:DLX6:DRGX:EN1:EN2:ESX1:GBX1:GBX2:GSX1:GSX2:HESX1:HOXA1:HOXA2:HOXA3:HOXA4:HOXA5:HOXB1:HOXB2:HOXB3:HOXB4:HOXB5:HOXC4:HOXC5:HOXD3:HOXD4:ISX:LBX2:LHX1:LHX2:LHX3:LHX4:LHX5:LHX6:LHX8:LHX9:LMX1A:LMX1B:MEOX1:MIXL1:MNX1:MSX1:MSX2:NKX1-1:NKX1-2:NOBOX:NOTO:OTP:PDX1:PHOX2A:PHOX2B:PROP1:PRRX1:PRRX2:RAX:RAX2:SEBOX:SHOX:SHOX2:UNCX:VAX1:VAX2…	CTAATTAA	0.001	-6.986	0.0092	32	10.39%	1509	5.70%
M10551_3.00:EOMES:TBR1:TBX21	GGAGGTGTGARD	0.001	-6.984	0.0092	52	16.88%	2866.4	10.83%
M02211_3.00:ALX1:ALX3:ALX4:ARX:BARHL1:BARHL2:BARX1:BARX2:BSX:DLX2:DLX3:DRGX:EN1:EN2:ESX1:GBX1:GBX2:HESX1:HOXA2:HOXB2:ISX:LBX2:LHX1:LHX2:LHX3:LHX4:LHX5:LHX6:LHX8:LHX9:LMX1A:LMX1B:MEOX1:MIXL1:MNX1:MSX1:MSX2:NKX1-1:NKX1-2:NOBOX:OTP:PHOX2A:PHOX2B:PROP1:PRRX1:PRRX2:RAX:RAX2:SEBOX:SHOX:SHOX2:UNCX:VSX1:VSX2	CTAATTAAB	0.001	-6.97	0.0094	24	7.79%	1009.1	3.81%
M11588_3.00:EBF1	WGCNCCCCNGGG	0.001	-6.969	0.0094	88	28.57%	5535.5	20.91%
M08834_3.00:EBF1	TCCCCAGGGGA	0.001	-6.957	0.0094	8	2.60%	166.3	0.63%
M10195_3.00:ELF1:ELF2:ELF4:ELK1:ELK3:ELK4:ERF:ERG:ETS1:ETS2:ETV1:ETV2:ETV3:ETV3L:ETV4:ETV5:FEV:FLI1:GABPA	GGSRCCGGAAGYGG	0.001	-6.957	0.0094	8	2.60%	166	0.63%
M09990_3.00:KLF1:KLF12:KLF3:KLF5:KLF8	CAGGGGGTG	0.001	-6.953	0.0095	34	11.04%	1641.1	6.20%
M10123_3.00:KLF1:KLF12:KLF3:KLF5:KLF8	CAGGGGGTG	0.001	-6.953	0.0095	34	11.04%	1641.1	6.20%
M09832_3.00:MITF:TFE3	GGTCACGTGA	0.001	-6.953	0.0095	6	1.95%	92.7	0.35%
M09866_3.00:MITF:TFE3:TFEB:TFEC	GGTCACGTGA	0.001	-6.953	0.0095	6	1.95%	92.7	0.35%
M12488_3.00:STAT6	RGGAARKC	0.001	-6.952	0.0095	220	71.43%	16630.1	62.81%
M12211_3.00:NR1H2:NR1H3:NR1H4:NR2C1:NR2C2:NR2F1:NR2F2:NR2F6:RARA:RARB:RARG:RORA:RORB:RORC:RXRA:RXRB:RXRG:VDR	AGGTCA	0.001	-6.944	0.0095	172	55.84%	12391.2	46.80%
M09243_3.00:ZNF729	ACWKCAARAAAAGCWA	0.001	-6.937	0.0095	10	3.25%	252.8	0.95%
M03940_3.00:FOXC1:FOXC2:FOXD1:FOXD2:FOXD3:FOXD4:FOXD4L1:FOXD4L3:FOXD4L4:FOXD4L5:FOXD4L6:FOXE1:FOXG1:FOXI1:FOXI2:FOXI3:FOXJ3:FOXK2:FOXL1:FOXL2:FOXS1	TTTGTTTAYATW	0.001	-6.932	0.0096	26	8.44%	1134.7	4.29%
M11826_3.00:ALX1:ALX3:ALX4:ARX:BARHL1:BARHL2:BARX1:BARX2:BSX:DLX1:DLX2:DLX3:DLX4:DLX5:DLX6:DRGX:EMX1:EMX2:EN1:EN2:ESX1:EVX1:EVX2:GBX1:GBX2:GSX1:GSX2:HMX1:HMX2:HMX3:HOXA1:HOXA2:HOXA3:HOXA4:HOXA5:HOXA6:HOXA7:HOXB1:HOXB2:HOXB3:HOXB4:HOXB5:HOXB6:HOXB7:HOXB8:HOXC4:HOXC5:HOXC6:HOXD1:HOXD3:HOXD4:HOXD8:ISX:LHX3:LHX4:MEOX1:MEOX2:MIXL1:MNX1:MSX1:MSX2:NANOG:NANOGP8:NKX1-1:NKX1-2:NOBOX:NOTO:OTP:PDX1:PHOX2A:P…	AVWCATTAAAAH	0.001	-6.929	0.0096	42	13.64%	2178.5	8.23%
M00277_3.00:SNAI2	NNNRCAGGTG	0.001	-6.921	0.0097	144	46.75%	10032.5	37.89%
M01565_3.00:ELF1:ELF2:ELF4:ELK1:ELK3:ELK4:ERF:ERG:ETS1:ETS2:ETV1:ETV2:ETV3:ETV3L:ETV4:ETV5:FEV:FLI1:GABPA	NACCGGAAGT	0.001	-6.918	0.0097	14	4.55%	447.3	1.69%
M07958_3.00:ZNF257	GAGGCAAGRG	0.01	-6.9	0.0099	62	20.13%	3596.4	13.58%
M00333_3.00:ALX1:ALX3:ALX4:ARX:BARX1:BARX2:BSX:DLX1:DLX2:DLX3:DLX6:DRGX:EMX1:EMX2:EN1:EN2:ESX1:EVX1:EVX2:GBX1:GBX2:GSX1:GSX2:HESX1:HOXA2:HOXA3:HOXB2:HOXB3:HOXD3:ISL1:ISL2:ISX:LBX1:LBX2:LHX1:LHX2:LHX3:LHX4:LHX5:LHX6:LHX8:LHX9:LMX1A:LMX1B:MEOX1:MIXL1:MNX1:MSX1:MSX2:NKX1-1:NKX1-2:NOBOX:NOTO:OTP:PDX1:PHOX2A:PHOX2B:PROP1:PRRX1:PRRX2:RAX:RAX2:SEBOX:SHOX:SHOX2:UNCX:VAX1:VAX2:VSX1:VSX2:ZFHX2:ZFHX3	NNNTAAT	0.01	-6.896	0.0099	284	92.21%	22860.2	86.35%
M09428_3.00:KLF1:KLF12:KLF2:KLF3:KLF4:KLF5:KLF6:KLF7:KLF8	DGGGYGKGGCCGGGG	0.01	-6.893	0.0099	20	6.49%	778.8	2.94%
M02793_3.00:EHF:ELF1:ELF2:ELF3:ELF4:ELF5:ETV6:ETV7:SPIC	GCGGAAGTG	0.01	-6.891	0.0099	24	7.79%	1015.2	3.83%
M10186_3.00:ELF1:ELF2:ELF4:ELK1:ELK3:ELK4:ERF:ERG:ETS1:ETS2:ETV1:ETV2:ETV3:ETV3L:ETV4:ETV5:FEV:FLI1:GABPA	RRGSAGGAAGTGRR	0.01	-6.891	0.0099	32	10.39%	1518	5.73%
M08139_3.00:ZNF682	VVCCCYCSCVGGCCAAGCCCC	0.01	-6.881	0.01	4	1.30%	35.7	0.13%
M12229_3.00:HNF4A:HNF4G:NR2E1:NR2F1:NR2F2:NR2F6:NR6A1:RXRB:RXRG	ANARGGBCAAAGKTCANGD	0.01	-6.881	0.01	4	1.30%	35.4	0.13%
M06081_3.00:ZNF569	GGMNWAGYANHMNNNNNNVW	0.01	-6.88	0.01	10	3.25%	254.1	0.96%
M05561_3.00:SIX3:SIX6	VCGTATCRYN	0.01	-6.862	0.0101	34	11.04%	1650.7	6.23%
M04354_3.00:HAND2	YGCAGGTGTT	0.01	-6.855	0.0102	28	9.09%	1265.2	4.78%
M08281_3.00:ATF3:JDP2	GTCACGTGACC	0.01	-6.847	0.0103	6	1.95%	94.1	0.36%
M10303_3.00:ALX1:ALX3:ALX4:ARX:BARX1:BARX2:BSX:DLX1:DLX2:DLX3:DLX4:DLX5:DLX6:DRGX:EMX1:EMX2:EN1:EN2:ESX1:EVX1:EVX2:GBX1:GBX2:GSX1:GSX2:HESX1:HOXA2:HOXA3:HOXB2:HOXB3:HOXD3:ISX:LBX1:LBX2:LHX1:LHX2:LHX3:LHX4:LHX5:LHX6:LHX8:LHX9:LMX1A:LMX1B:MEOX1:MIXL1:MNX1:MSX1:MSX2:NKX1-1:NKX1-2:NOBOX:NOTO:OTP:PDX1:PHOX2A:PHOX2B:PROP1:PRRX1:PRRX2:RAX:RAX2:SEBOX:SHOX:SHOX2:UNCX:VAX1:VAX2:VSX1:VSX2:ZFHX2:ZFHX3	KAAGCTAATTAR	0.01	-6.847	0.0103	6	1.95%	94.4	0.36%
M09452_3.00:KLF10:KLF11	GGSNGGGGGCGKGGC	0.01	-6.839	0.0103	16	5.19%	557.9	2.11%
M12551_3.00:POU2AF1	ATATGCAAATC	0.01	-6.823	0.0105	10	3.25%	256	0.97%
M06009_3.00:TBX6	DAGGTGTGAA	0.01	-6.822	0.0105	46	14.94%	2466.2	9.32%
M08661_3.00:HAND2	CAGATG	0.01	-6.817	0.0105	48	15.58%	2606.6	9.85%
M03296_3.00:RHOXF1	HTRATCCC	0.01	-6.815	0.0105	144	46.75%	10055.1	37.98%
M08363_3.00:CTCF	CACYAGRGGGCR	0.01	-6.814	0.0105	12	3.90%	351.2	1.33%
M11874_3.00:PBX1:PBX2:PBX3:PBX4	SSMTGTCAATCAMN	0.01	-6.81	0.0106	8	2.60%	170.7	0.64%
M01997_3.00:FBXL19:KDM2A:KDM2B	NNNNCGNNNN	0.01	-6.807	0.0106	78	25.32%	4800.4	18.13%
M00239_3.00:ESR1:ESR2:HNF4A:HNF4G:NR1D1:NR1D2:NR1H2:NR1H3:NR1H4:NR2C1:NR2C2:NR2F1:NR2F2:NR2F6:NR4A1:NR4A2:NR4A3:NR5A2:NR6A1:PPARA:PPARD:PPARG:RARA:RARB:RARG:RORA:RORB:RORC:RXRA:RXRB:RXRG:THRA:THRB	RRGGTCAH	0.01	-6.798	0.0107	104	33.77%	6814.3	25.74%
M04860_3.00:SCRT1:SCRT2	NGCAACAGGTG	0.01	-6.774	0.0109	8	2.60%	171.7	0.65%
M11245_3.00:REST	ACAGCGW	0.01	-6.774	0.0109	26	8.44%	1147.4	4.33%
M05339_3.00:CRX:DMBX1:DPRX:GSC:GSC2:OTX1:OTX2:PITX1:PITX2:PITX3:TPRX1	CTAATCCS	0.01	-6.773	0.0109	74	24.03%	4504.4	17.01%
M06286_3.00:ZNF385B	NNNRTTTAAAKGGHH	0.01	-6.767	0.011	16	5.19%	561.3	2.12%
M11244_3.00:REST	GGACAGCKC	0.01	-6.759	0.011	20	6.49%	787.7	2.98%
M11385_3.00:HINFP	AACGTCCG	0.01	-6.745	0.0112	6	1.95%	96.1	0.36%
M09907_3.00:ATF1:CREB1:CREM	TGACGTCABYG	0.01	-6.717	0.0115	18	5.84%	675.2	2.55%
M09968_3.00:ATF1:CREB1:CREM	TGACGTCABYG	0.01	-6.717	0.0115	18	5.84%	675.2	2.55%
M02616_3.00:LIN54	DTTTRAAWWN	0.01	-6.711	0.0115	152	49.35%	10746.6	40.59%
M06185_3.00:LEUTX:TPRX1	NNHTAATCCN	0.01	-6.711	0.0115	94	30.52%	6046.9	22.84%
M09219_3.00:ZNF836	GAAHGAGNAAAGAAAYAANWAC	0.01	-6.691	0.0117	4	1.30%	37.8	0.14%
M10406_3.00:NR1I2:NR1I3:VDR	WRRGGTCAANNAAGTTCAB	0.01	-6.691	0.0117	4	1.30%	37.2	0.14%
M10439_3.00:NR1I2:VDR	WRRGGTCAANNAAGTTCAB	0.01	-6.691	0.0117	4	1.30%	37.2	0.14%
M11571_3.00:E2F1:E2F2:E2F3:E2F4:E2F5:E2F6	TTGGCGCGAAAMVGVM	0.01	-6.691	0.0117	4	1.30%	37.3	0.14%
M02540_3.00:GMEB1:GMEB2	NKTACGTVR	0.01	-6.682	0.0118	100	32.47%	6521.8	24.63%
M01561_3.00:ELF1:ELF2:ELF4:ELK1:ELK3:ELK4:ERF:ERG:ETS1:ETS2:ETV1:ETV2:ETV3:ETV3L:ETV4:ETV5:FEV:FLI1:GABPA	NACCGGAAGT	0.01	-6.676	0.0118	14	4.55%	459	1.73%
M04590_3.00:ZNF263	VGGGAGCACB	0.01	-6.673	0.0119	24	7.79%	1032.9	3.90%
M04641_3.00:EGR1:EGR2:EGR3:EGR4	GBGCGTGGGCGKG	0.01	-6.661	0.012	16	5.19%	567.4	2.14%
M01573_3.00:EHF:ELF1:ELF2:ELF3:ELF4:ELF5:ETV6:ETV7	DNSCGGAART	0.01	-6.651	0.0121	72	23.38%	4374.7	16.52%
M04036_3.00:ALX1:ALX3:ALX4:ARX:BARHL1:BARHL2:BARX1:BARX2:BSX:DLX1:DLX2:DLX3:DLX4:DLX5:DLX6:DRGX:EMX1:EMX2:EN1:EN2:ESX1:EVX1:EVX2:GBX1:GBX2:GSX1:GSX2:HMX1:HMX2:HMX3:HOXA1:HOXA2:HOXA3:HOXA4:HOXA5:HOXB1:HOXB2:HOXB3:HOXB4:HOXB5:HOXC12:HOXC4:HOXC5:HOXD1:HOXD3:HOXD4:LBX1:LBX2:LHX1:LHX5:MEOX1:MEOX2:MIXL1:MNX1:MSX1:MSX2:NANOG:NANOGP8:NKX1-1:NKX1-2:PDX1:PHOX2A:PHOX2B:PROP1:PRRX1:PRRX2:RAX:RAX2:SHOX:SHOX2:…	DNTAATTASC	0.01	-6.65	0.0121	84	27.27%	5284.8	19.96%
M11120_3.00:CEBPA:CEBPB:CEBPE	VTTDKGCAATH	0.01	-6.646	0.0121	94	30.52%	6058.9	22.89%
M03457_3.00:HOXA10:HOXA11:HOXA6:HOXA9:HOXB6:HOXB8:HOXB9:HOXC10:HOXC11:HOXC12:HOXC6:HOXC8:HOXC9:HOXD10:HOXD11:HOXD12:HOXD8:HOXD9	TTTTTATTRC	0.01	-6.644	0.0121	34	11.04%	1672.5	6.32%
M12295_3.00:ESR1:ESR2:HNF4A:HNF4G:NR1D1:NR1D2:NR1H2:NR1H3:NR1H4:NR2C1:NR2C2:NR2F1:NR2F2:NR2F6:NR4A1:NR4A2:NR4A3:NR5A2:NR6A1:PPARA:PPARD:PPARG:RARA:RARB:RARG:RORA:RORB:RORC:RXRA:RXRB:RXRG:THRA:THRB	AAGGTCA	0.01	-6.64	0.0122	98	31.82%	6372.2	24.07%
M04012_3.00:CRX:DMBX1:DPRX:GSC:GSC2:OTX1:OTX2:PITX1:PITX2:PITX3:TPRX1	HTAATCCS	0.01	-6.629	0.0123	78	25.32%	4831	18.25%
M00365_3.00:CRX:DMBX1:DPRX:GSC:GSC2:OTX1:OTX2:PITX1:PITX2:PITX3:TPRX1	TTAATCCY	0.01	-6.62	0.0124	90	29.22%	5752.4	21.73%
M05340_3.00:CRX:DMBX1:DPRX:GSC:GSC2:OTX1:OTX2:PITX1:PITX2:PITX3:TPRX1	CTAATCCS	0.01	-6.606	0.0126	78	25.32%	4834.8	18.26%
M10140_3.00:ZFX:ZFY	SVGSGSCSCAGGCCBSGGC	0.01	-6.602	0.0126	10	3.25%	264.4	1.00%
M06222_3.00:FOSL2	ATGASTCA	0.01	-6.595	0.0127	66	21.43%	3936.1	14.87%
M05431_3.00:HESX1:NOBOX	CTAATTAW	0.01	-6.593	0.0127	52	16.88%	2918.9	11.03%
M01830_3.00:NEUROG1	RMCATATGGT	0.01	-6.585	0.0128	24	7.79%	1039.3	3.93%
M05309_3.00:HOXA10:HOXA11:HOXA5:HOXA6:HOXA7:HOXA9:HOXB5:HOXB6:HOXB8:HOXB9:HOXC10:HOXC11:HOXC5:HOXC6:HOXC8:HOXC9:HOXD10:HOXD11:HOXD8:HOXD9	DTTTTACGAC	0.01	-6.584	0.0128	12	3.90%	361.9	1.37%
M08027_3.00:ZNF714	SAGCAGCAMYGC	0.01	-6.561	0.013	12	3.90%	362.1	1.37%
M11663_3.00:FOXA1:FOXA2:FOXA3:FOXB1:FOXB2	TAARYAAAYATTNCA	0.01	-6.559	0.0131	18	5.84%	685.2	2.59%
M04062_3.00:ALX1:ALX3:ALX4:ARX:BARHL1:BARHL2:BARX1:BARX2:BSX:DLX2:DLX3:DRGX:EMX1:EMX2:EN1:EN2:ESX1:EVX1:EVX2:GBX1:GBX2:GSX1:GSX2:HESX1:HMX2:HOXA2:HOXA3:HOXA4:HOXA5:HOXB1:HOXB2:HOXB3:HOXB4:HOXB5:HOXC4:HOXD3:HOXD4:ISX:MEOX1:MEOX2:MIXL1:MNX1:MSX1:MSX2:NKX1-1:NKX1-2:OTP:PDX1:PHOX2A:PHOX2B:PROP1:PRRX1:PRRX2:RAX:RAX2:SHOX:SHOX2:TLX1:TLX2:TLX3:UNCX:VAX1:VAX2:VENTX:VSX1:VSX2	CTAAACGG	0.01	-6.557	0.0131	34	11.04%	1681.2	6.35%
M06828_3.00:NR2E3	AAAAATCAAAGGT	0.01	-6.548	0.0132	10	3.25%	266.9	1.01%
M06057_3.00:ZNF606	NNNGWRGARACCGHDNNNNN	0.01	-6.546	0.0132	6	1.95%	100.1	0.38%
M06040_3.00:CREB3L3	TGCSACGTSANM	0.01	-6.522	0.0135	16	5.19%	575.4	2.17%
M01404_3.00:LIN54	DTTTGAAWH	0.01	-6.515	0.0136	86	27.92%	5462.7	20.63%
M05628_3.00:PAX3:PAX7	NTAATCGATTAN	0.01	-6.511	0.0136	4	1.30%	39.5	0.15%
M08980_3.00:ATF3:JDP2	GTCACGTG	0.01	-6.5	0.0138	22	7.14%	924.2	3.49%
M06582_3.00:EHF:ELF1:ELF2:ELF3:ELF4:ELF5:ELK1:ELK3:ELK4:ERF:ERG:ETS1:ETS2:ETV1:ETV2:ETV3:ETV3L:ETV4:ETV5:ETV6:ETV7:FEV:FLI1:GABPA:SPDEF	AACAGGAAGT	0.01	-6.466	0.0142	26	8.44%	1173.1	4.43%
M10264_3.00:HOXA10:HOXA4:HOXA5:HOXA6:HOXA7:HOXA9:HOXB4:HOXB5:HOXB6:HOXB7:HOXB8:HOXB9:HOXC10:HOXC4:HOXC5:HOXC6:HOXC8:HOXC9:HOXD10:HOXD4:HOXD8:HOXD9:MNX1:PDX1	BCATTAATCAA	0.01	-6.462	0.0142	8	2.60%	180.4	0.68%
M10337_3.00:HOXA10:HOXA4:HOXA5:HOXA6:HOXA7:HOXA9:HOXB4:HOXB5:HOXB6:HOXB7:HOXB8:HOXB9:HOXC10:HOXC4:HOXC5:HOXC6:HOXC8:HOXC9:HOXD10:HOXD4:HOXD8:HOXD9:MNX1:PDX1	BCATTAATCAA	0.01	-6.462	0.0142	8	2.60%	180.4	0.68%
M11292_3.00:GLIS3	GTGGGGGGTM	0.01	-6.46	0.0142	22	7.14%	927.6	3.50%
M03305_3.00:HOXA13:HOXB13:HOXC13:HOXD13	TTTTTACGAGW	0.01	-6.45	0.0144	6	1.95%	102.8	0.39%
M03346_3.00:HOXA13:HOXB13:HOXC13:HOXD13	DTTTTACGAGC	0.01	-6.45	0.0144	6	1.95%	103	0.39%
M00225_3.00:DBX2:NKX3-1:NKX3-2	TTAAGTGSNB	0.01	-6.449	0.0144	66	21.43%	3959.7	14.96%
M09885_3.00:TCF12:TCF3:TCF4	RGCAGGTGGG	0.01	-6.442	0.0144	66	21.43%	3960.2	14.96%
M10967_3.00:BHLHE40:BHLHE41	GGTCACGTGCGG	0.01	-6.441	0.0144	20	6.49%	809.9	3.06%
M02261_3.00:ALX1:ALX3:ALX4:ARX:BARHL1:BARHL2:BARX1:BARX2:BSX:DLX1:DLX2:DLX3:DLX4:DLX5:DLX6:DRGX:EMX1:EMX2:EN1:EN2:ESX1:GBX1:GBX2:GSX1:GSX2:HMX1:HMX2:HMX3:HOXA1:HOXA2:HOXA3:HOXA4:HOXA5:HOXB1:HOXB2:HOXB3:HOXB4:HOXB5:HOXC4:HOXC5:HOXD1:HOXD3:HOXD4:ISL1:ISL2:LHX2:LHX3:LHX4:LHX9:LMX1A:LMX1B:MEOX1:MIXL1:MNX1:MSX1:MSX2:NKX1-1:NKX1-2:NOBOX:NOTO:OTP:PDX1:PHOX2A:PHOX2B:PROP1:PRRX1:PRRX2:RAX:RAX2:SEBOX:SHOX:…	NNTAATTRN	0.01	-6.437	0.0145	160	51.95%	11483.8	43.38%
M09898_3.00:TCF12:TCF3:TCF4	VCAGGTGCR	0.01	-6.433	0.0145	52	16.88%	2941	11.11%
M10251_3.00:ISL1:ISL2:NOTO:SHOX:SHOX2:VSX1	SCTAATGGV	0.01	-6.432	0.0145	84	27.27%	5323.8	20.11%
M10332_3.00:ISL1:ISL2:NOTO:SHOX:SHOX2:VSX1	SCTAATGGV	0.01	-6.432	0.0145	84	27.27%	5323.8	20.11%
M10720_3.00:BORCS8-MEF2B:MEF2A:MEF2B:MEF2C:MEF2D	KCTATTTTTRGH	0.01	-6.426	0.0146	52	16.88%	2941.3	11.11%
M06088_3.00:ZNF347	GGGGRGHTVGAADGGGRHBG	0.01	-6.425	0.0146	4	1.30%	40.9	0.15%
M12032_3.00:MEF2A	ATTHCCAWAWATAGTAAD	0.01	-6.425	0.0146	4	1.30%	40.5	0.15%
M12033_3.00:MEF2A	ATTHCCAWAWATAGTAAD	0.01	-6.425	0.0146	4	1.30%	40.5	0.15%
M08397_3.00:E2F1:E2F2:E2F3:E2F4:E2F5:E2F6	NGGGCGGGAAV	0.01	-6.424	0.0146	24	7.79%	1052.8	3.98%
M01566_3.00:EHF:ELF1:ELF2:ELF3:ELF4:ELF5:ETV6:ETV7:FEV	ANSCGGAAGT	0.01	-6.423	0.0146	54	17.53%	3085.1	11.65%
M00217_3.00:FOXA1:FOXA2:FOXA3:FOXB1:FOXB2	TTGTTTAC	0.01	-6.42	0.0146	38	12.34%	1964.3	7.42%
M02134_3.00:ALX1:ALX3:ALX4:ARX:DRGX:EMX1:EMX2:EN1:EN2:ESX1:GBX1:GBX2:GSX1:GSX2:HESX1:HOXA2:HOXA3:HOXB2:HOXB3:ISL1:ISL2:ISX:LHX1:LHX2:LHX3:LHX4:LHX5:LHX6:LHX8:LHX9:LMX1A:LMX1B:MIXL1:MSX1:MSX2:NOBOX:NOTO:OTP:PHOX2A:PHOX2B:PROP1:PRRX1:PRRX2:RAX:RAX2:SEBOX:SHOX:SHOX2:UNCX:VAX1:VAX2:VSX1:VSX2:ZFHX2	NACTAATTAANN	0.01	-6.419	0.0146	18	5.84%	694.2	2.62%
M11830_3.00:ALX1:ALX3:ALX4:ARX:BARHL1:BARHL2:BARX1:BARX2:BSX:DLX1:DLX2:DLX3:DLX4:DLX5:DLX6:DRGX:EMX1:EMX2:EN1:EN2:ESX1:EVX1:EVX2:GBX1:GBX2:GSX1:GSX2:HMX1:HMX2:HMX3:HOXA1:HOXA2:HOXA3:HOXA4:HOXA5:HOXA6:HOXA7:HOXB1:HOXB2:HOXB3:HOXB4:HOXB5:HOXB6:HOXB7:HOXB8:HOXC4:HOXC5:HOXC6:HOXD1:HOXD3:HOXD4:HOXD8:ISX:LHX3:LHX4:MEOX1:MEOX2:MIXL1:MNX1:MSX1:MSX2:NANOG:NANOGP8:NKX1-1:NKX1-2:NOBOX:NOTO:OTP:PDX1:PHOX2A:P…	HCATTAR	0.01	-6.417	0.0146	138	44.81%	9645.4	36.43%
M05226_3.00:CRX:DMBX1:DPRX:GSC:GSC2:OTX1:OTX2:PITX1:PITX2:PITX3:TPRX1	NTAATCCS	0.01	-6.409	0.0147	78	25.32%	4868.9	18.39%
M01111_3.00:TBX2:TBX3:TBX4:TBX5	AGGTGTGA	0.01	-6.409	0.0147	44	14.29%	2378.7	8.98%
M02281_3.00:BARX1:BARX2:BSX:DLX1:DLX2:DLX3:DLX4:DLX5:DLX6:EMX1:EMX2:EN1:EN2:EVX1:EVX2:GBX1:GBX2:GSX1:GSX2:HOXA1:HOXA2:HOXA3:HOXA4:HOXA5:HOXB1:HOXB2:HOXB3:HOXB4:HOXB5:HOXC4:HOXC5:HOXC8:HOXD1:HOXD3:HOXD4:ISX:MEOX1:MEOX2:MNX1:MSX1:MSX2:NANOG:NANOGP8:NKX1-1:NKX1-2:PDX1:PROP1:SHOX:SHOX2:UNCX:VAX1:VAX2:VENTX	TTAATTAG	0.01	-6.408	0.0147	22	7.14%	931.2	3.52%
M03286_3.00:CRX:DMBX1:DPRX:GSC:GSC2:OTX1:OTX2:PITX1:PITX2:PITX3:TPRX1	NYTAATCCC	0.01	-6.404	0.0147	78	25.32%	4869.1	18.39%
M02609_3.00:LIN54	DATTYAAAW	0.01	-6.401	0.0147	70	22.73%	4265.3	16.11%
M11854_3.00:DBX2:NKX3-1:NKX3-2	NCACTTAKTCN	0.01	-6.401	0.0147	36	11.69%	1831.4	6.92%
M00378_3.00:NKX2-1:NKX2-2:NKX2-3:NKX2-4:NKX2-5:NKX2-6:NKX2-8	NRCCACTTAAR	0.01	-6.399	0.0148	20	6.49%	813	3.07%
M10285_3.00:BARX1:BARX2:BSX:EMX1:EMX2:EN1:EN2:EVX1:EVX2:GBX1:GBX2:GSX1:GSX2:HMX1:HMX2:HMX3:HOXA1:HOXA2:HOXA3:HOXA4:HOXA5:HOXA6:HOXA7:HOXB1:HOXB2:HOXB3:HOXB4:HOXB5:HOXB6:HOXB7:HOXB8:HOXC4:HOXC5:HOXC6:HOXD1:HOXD3:HOXD4:HOXD8:ISX:MEOX1:MEOX2:MNX1:NKX1-1:NKX1-2:NOTO:OTP:PDX1:TLX2:VAX1:VAX2:VENTX	YTAATGRC	0.01	-6.398	0.0148	68	22.08%	4116.4	15.55%
M10327_3.00:BARX1:BARX2:BSX:EMX1:EMX2:EN1:EN2:EVX1:EVX2:GBX1:GBX2:GSX1:GSX2:HMX1:HMX2:HMX3:HOXA1:HOXA2:HOXA3:HOXA4:HOXA5:HOXA6:HOXA7:HOXB1:HOXB2:HOXB3:HOXB4:HOXB5:HOXB6:HOXB7:HOXB8:HOXC4:HOXC5:HOXC6:HOXD1:HOXD3:HOXD4:HOXD8:ISX:MEOX1:MEOX2:MNX1:NKX1-1:NKX1-2:NOTO:OTP:PDX1:TLX2:VAX1:VAX2:VENTX	YTAATGRC	0.01	-6.398	0.0148	68	22.08%	4116.4	15.55%
M08589_3.00:ZNF488	CMCAGCAGGRD	0.01	-6.396	0.0148	28	9.09%	1306.2	4.93%
M11661_3.00:FOXO1:FOXO3:FOXO4:FOXO6:FOXP4	TRTAAACAARTW	0.01	-6.395	0.0148	42	13.64%	2241.9	8.47%
M10707_3.00:CRX:DMBX1:DPRX:GSC:GSC2:OTX1:OTX2:PITX1:PITX2:PITX3:TPRX1	YTAATCCY	0.01	-6.394	0.0148	102	33.12%	6735.2	25.44%
M03077_3.00:SNAI2	DRCAGGTGB	0.01	-6.394	0.0148	90	29.22%	5794.9	21.89%
M10087_3.00:KLF1:KLF12:KLF2:KLF3:KLF4:KLF5:KLF6:KLF7	KGRAGWGGGTGKGGC	0.01	-6.384	0.0149	12	3.90%	370.8	1.40%
M00483_3.00:CRX:DMBX1:DPRX:GSC:GSC2:OTX1:OTX2:PITX1:PITX2:PITX3:TPRX1	NTAATCCB	0.01	-6.378	0.0149	122	39.61%	8342.7	31.51%
M05077_3.00:GATA1:GATA2:GATA3:GATA4:GATA5:GATA6	NWGATAAGRN	0.01	-6.375	0.015	34	11.04%	1700.9	6.42%
M10164_3.00:E2F1:E2F2:E2F3:E2F4:E2F5:E2F6	GRGGGCGGGAAR	0.01	-6.366	0.0151	14	4.55%	475	1.79%
M09855_3.00:ARNT:ARNT2	GGCACGTAS	0.01	-6.363	0.0151	24	7.79%	1057.9	4.00%
M05134_3.00:CRX:DMBX1:DPRX:GSC:GSC2:OTX1:OTX2:PITX1:PITX2:PITX3:TPRX1	YTAATCCC	0.01	-6.358	0.0152	78	25.32%	4877.7	18.42%
M05336_3.00:RHOXF2:RHOXF2B	YTAATCCC	0.01	-6.358	0.0152	78	25.32%	4877.7	18.42%
M03830_3.00:SREBF1:SREBF2	ATCACGTGAY	0.01	-6.357	0.0152	6	1.95%	104.6	0.40%
M03321_3.00:CRX:DMBX1:DPRX:GSC:GSC2:OTX1:OTX2:PITX1:PITX2:PITX3:TPRX1	YTAATCCG	0.01	-6.355	0.0152	84	27.27%	5337.8	20.16%
M05528_3.00:ALX1:ALX3:ALX4:ARX:BARHL1:BARHL2:DRGX:ESX1:GBX1:GBX2:HESX1:HMX1:HMX2:HMX3:ISX:LBX1:LBX2:MEOX1:MEOX2:MIXL1:MSX1:MSX2:PHOX2A:PHOX2B:PROP1:PRRX1:PRRX2:RAX:RAX2:SHOX:SHOX2:TLX2:UNCX:VENTX:VSX1:VSX2	TTAACGAG	0.01	-6.353	0.0152	28	9.09%	1311	4.95%
M06408_3.00:ARNT:ARNT2	GGTCACGTAY	0.01	-6.341	0.0154	4	1.30%	41.1	0.16%
M04100_3.00:PAX6	CKAATTAR	0.01	-6.323	0.0156	30	9.74%	1442.1	5.45%
M08841_3.00:ELF1:ELF2:ELF4:ELK1:ELK3:ELK4:ERF:ERG:ETS1:ETS2:ETV1:ETV2:ETV3:ETV3L:ETV4:ETV5:FEV:FLI1:GABPA	CCGGAAGTG	0.01	-6.319	0.0157	12	3.90%	373.4	1.41%
M10893_3.00:ASH1L:HMGA1:HMGA2:SETBP1:SRCAP	DAANAA	0.01	-6.302	0.0159	290	94.16%	23608.8	89.17%
M08603_3.00:DACH1	YTATCTATCWATCWW	0.01	-6.298	0.016	12	3.90%	374	1.41%
M06105_3.00:MKX	NNNNNNNDACAT	0.01	-6.289	0.0161	194	62.99%	14455.3	54.60%
M01401_3.00:LIN54	TTYAAAWN	0.01	-6.288	0.0161	208	67.53%	15698.6	59.30%
M11318_3.00:EGR1:EGR2:EGR3:EGR4	GCGGGGGCGG	0.01	-6.287	0.0161	20	6.49%	820.5	3.10%
M11293_3.00:GLIS3	CAGCWGGGGGSRW	0.01	-6.285	0.0161	16	5.19%	589	2.22%
M08090_3.00:ZNF730	GGGMAGCTA	0.01	-6.281	0.0161	50	16.23%	2818.9	10.65%
M00198_3.00:ZNF740	NNTGGGGGGG	0.01	-6.277	0.0162	62	20.13%	3690.3	13.94%
M10198_3.00:ELF1:ELF2:ELF4:ELK1:ELK3:ELK4:ERF:ERG:ETS1:ETS2:ETV1:ETV2:ETV3:ETV3L:ETV4:ETV5:FEV:FLI1:GABPA	GRRCCGGAAGYGG	0.01	-6.276	0.0162	12	3.90%	376	1.42%
M01577_3.00:ELF1:ELF2:ELF4:ELK1:ELK3:ELK4:ERF:ERG:ETS1:ETS2:ETV1:ETV2:ETV3:ETV3L:ETV4:ETV5:ETV6:FEV:FLI1:GABPA	NACCGGAARY	0.01	-6.268	0.0163	52	16.88%	2963.6	11.19%
M03363_3.00:ARX:BARHL1:BARHL2:BARX1:BARX2:BSX:DLX1:DLX2:DLX3:DLX4:DLX5:DLX6:EMX1:EMX2:ESX1:EVX1:EVX2:GBX1:GBX2:HMX1:HMX2:HMX3:HOXA2:HOXB2:LBX1:LBX2:MEOX1:MEOX2:MNX1:MSX1:MSX2:NANOG:NANOGP8:NKX1-1:NKX1-2:PDX1:RAX:RAX2:TLX1:TLX2:TLX3:UNCX:VAX1:VAX2	TAAWYGNYVHTAAWYG	0.01	-6.265	0.0163	6	1.95%	106.3	0.40%
M05201_3.00:CRX:DMBX1:DPRX:GSC:GSC2:OTX1:OTX2:PITX1:PITX2:PITX3:TPRX1	YTAATCCC	0.01	-6.263	0.0164	82	26.62%	5200.8	19.64%
M04487_3.00:JUN:JUNB:JUND	GATGASTCATS	0.01	-6.26	0.0164	10	3.25%	277.9	1.05%
M08406_3.00:EHF:ELF1:ELF2:ELF3:ELF4:ELF5:ELK1:ELK3:ELK4:ERF:ERG:ETS1:ETS2:ETV1:ETV2:ETV3:ETV3L:ETV4:ETV5:ETV6:ETV7:FEV:FLI1:GABPA:SPDEF	GAACCCGGAAGTGG	0.01	-6.259	0.0164	4	1.30%	42.8	0.16%
M10202_3.00:EHF:ELF1:ELF2:ELF3:ELF4:ELF5:ELK1:ELK3:ELK4:ERF:ERG:ETS1:ETS2:ETV1:ETV2:ETV3:ETV3L:ETV4:ETV5:ETV6:ETV7:FEV:FLI1:GABPA:SPDEF	GAACCCGGAAGTGG	0.01	-6.259	0.0164	4	1.30%	42.8	0.16%
M04130_3.00:NR1D1:NR1D2:NR1H2:NR1H3:NR1H4:NR2C1:NR2C2:NR2F1:NR2F2:NR2F6:NR4A1:NR4A2:NR4A3:NR5A1:NR5A2:NR6A1:PPARA:PPARD:PPARG:RARA:RARB:RARG:RORA:RORB:RORC:RXRA:RXRB:RXRG:THRA:THRB	AGGTCAGTAGGTCA	0.01	-6.257	0.0164	2	0.65%	4.2	0.02%
M05624_3.00:PAX3:PAX7	BBGTCACGSTTATTAD	0.01	-6.257	0.0164	2	0.65%	4.7	0.02%
M04864_3.00:MBNL2	TYGCYTYGCTTH	0.01	-6.254	0.0164	14	4.55%	481.7	1.82%
M10975_3.00:MYC	VGCCACGTGCB	0.01	-6.252	0.0164	16	5.19%	591.7	2.23%
M00859_3.00:ZFX:ZFY	NRGGCCNNN	0.01	-6.252	0.0164	176	57.14%	12895.8	48.71%
M03315_3.00:CRX:DMBX1:DPRX:GSC:GSC2:OTX1:OTX2:PITX1:PITX2:PITX3:TPRX1	NYTAATCCC	0.01	-6.234	0.0167	78	25.32%	4899.7	18.51%
M11112_3.00:FOS:FOSB:FOSL1:FOSL2	HTGAGTCA	0.01	-6.231	0.0167	76	24.68%	4747.8	17.93%
M03012_3.00:TCF12:TCF3:TCF4	HRCACCTGBN	0.01	-6.221	0.0169	122	39.61%	8376.6	31.64%
M03334_3.00:HOXA13:HOXB13:HOXC13:HOXD13	DTTTTACGAGM	0.01	-6.22	0.0169	6	1.95%	107.4	0.41%
M04068_3.00:BARHL1:BARHL2:EMX1:EMX2:EN1:EN2:ESX1:EVX1:EVX2:GBX1:GBX2:GSX1:GSX2:HESX1:HMX1:HMX2:HMX3:HOXA2:HOXA3:HOXA4:HOXA5:HOXB2:HOXB3:HOXB4:HOXB5:HOXC4:HOXC5:HOXD3:HOXD4:LBX1:MEOX1:MEOX2:MNX1:MSX1:MSX2:NKX1-1:NKX1-2:OTP:PDX1:RAX:RAX2:TLX1:TLX2:TLX3:VAX1:VAX2:VENTX	YYAATAAACCAATTAA	0.01	-6.22	0.0169	6	1.95%	107.8	0.41%
M08401_3.00:E2F1:E2F2:E2F3:E2F4:E2F5:E2F6	GGCGGGAAAWBBVRR	0.01	-6.22	0.0169	6	1.95%	107.8	0.41%
M03192_3.00:EHF:ELF1:ELF2:ELF3:ELF4:ELF5:ETV6:ETV7:SPI1:SPIC	ACCCGGAAGTD	0.01	-6.217	0.0169	14	4.55%	483.3	1.83%
M02277_3.00:CRX:DMBX1:DPRX:GSC:GSC2:OTX1:OTX2:PITX1:PITX2:PITX3:TPRX1	NHTAATCCSN	0.01	-6.201	0.0171	88	28.57%	5675.9	21.44%
M12478_3.00:STAT5A	NAWTTCYNGGAAATN	0.01	-6.175	0.0176	6	1.95%	108.6	0.41%
M03263_3.00:FOXC1:FOXC2:FOXD1:FOXD2:FOXD3:FOXD4:FOXD4L1:FOXD4L3:FOXD4L4:FOXD4L5:FOXD4L6:FOXE1:FOXF1:FOXF2:FOXG1:FOXI1:FOXI3:FOXK2:FOXL1:FOXL2:FOXP4:FOXS1	TGTTTATTTAC	0.01	-6.171	0.0176	16	5.19%	596.7	2.25%
M04021_3.00:CRX:DMBX1:DPRX:GSC:GSC2:OTX1:OTX2:PITX1:PITX2:PITX3:TPRX1	TAATCCG	0.01	-6.164	0.0177	92	29.87%	5994.6	22.64%
M12216_3.00:ESR1:ESR2:NR1D1:NR1D2:NR1H2:NR1H3:NR1H4:NR2C1:NR2C2:NR2F1:NR2F2:NR2F6:NR4A1:NR4A2:NR4A3:NR5A1:NR5A2:NR6A1:PPARA:PPARD:PPARG:RARA:RARB:RARG:RORA:RORB:RORC:RXRA:RXRB:RXRG:THRA:THRB	TAANTRGGTCA	0.01	-6.138	0.0182	16	5.19%	598.7	2.26%
M12307_3.00:NR1D1:NR1D2:NR2C1:NR2C2:NR2F1:NR2F2:NR2F6:NR6A1:PPARA:PPARD:PPARG:RARA:RARB:RARG:RORA:RORB:RORC:RXRA:RXRB:RXRG	RAGGTCA	0.01	-6.134	0.0182	124	40.26%	8558.4	32.33%
M02314_3.00:ARX:BARHL1:BARHL2:BARX1:BARX2:BSX:EMX1:EMX2:EN1:EN2:ESX1:EVX1:EVX2:GBX1:GBX2:GSX1:GSX2:HMX2:HOXA1:HOXA2:HOXA3:HOXA4:HOXA5:HOXB1:HOXB2:HOXB3:HOXB4:HOXB5:HOXC4:HOXC5:HOXD1:HOXD3:HOXD4:MEOX1:MEOX2:MIXL1:MNX1:MSX1:MSX2:NANOG:NANOGP8:NKX1-1:NKX1-2:PDX1:PHOX2A:PHOX2B:PRRX1:PRRX2:RAX:RAX2:SHOX:SHOX2:UNCX:VAX1:VAX2:VENTX:VSX1:VSX2	ATTAATTA	0.01	-6.116	0.0185	26	8.44%	1204.8	4.55%
M03949_3.00:FOXN2:FOXN3	TTTGTTTACAT	0.01	-6.11	0.0186	10	3.25%	283.8	1.07%
M04048_3.00:CRX:DMBX1:DPRX:GSC:GSC2:OTX1:OTX2:PITX1:PITX2:PITX3:TPRX1	RCGTTAATCCN	0.01	-6.11	0.0186	10	3.25%	283.9	1.07%
M02470_3.00:NR1D1:NR1D2:NR1H2:NR1H3:NR1H4:NR2C1:NR2C2:NR2F1:NR2F2:NR2F6:NR4A1:NR4A2:NR4A3:NR5A1:NR5A2:NR6A1:PPARA:PPARD:PPARG:RARA:RARB:RARG:RORA:RORB:RORC:RXRA:RXRB:RXRG:THRA:THRB	NRGGTCA	0.01	-6.109	0.0186	120	38.96%	8238.5	31.12%
M11631_3.00:ELF1:ELF2:ELF4:ELK1:ELK3:ELK4:ERF:ERG:ETS1:ETS2:ETV1:ETV2:ETV3:ETV3L:ETV4:ETV5:FEV:FLI1:GABPA	GVRCCGGAAGTG	0.01	-6.107	0.0186	8	2.60%	191.5	0.72%
M04096_3.00:PAX3:PAX7	VNTAATCRATTANS	0.01	-6.101	0.0187	4	1.30%	44.6	0.17%
M00550_3.00:ALX1:ALX3:ALX4:ARX:BARHL1:BARHL2:BARX1:BARX2:BSX:DLX1:DLX2:DLX3:DLX6:DRGX:EMX1:EMX2:EN1:EN2:ESX1:EVX1:EVX2:GBX1:GBX2:GSX1:GSX2:HESX1:HMX1:HMX2:HMX3:HOXA1:HOXA2:HOXA3:HOXA4:HOXA5:HOXB1:HOXB2:HOXB3:HOXB4:HOXB5:HOXC4:HOXC5:HOXD3:HOXD4:LHX2:LHX3:LHX4:LHX9:MEOX1:MEOX2:MIXL1:MNX1:MSX1:MSX2:NKX1-1:NKX1-2:NOTO:OTP:PDX1:PHOX2A:PHOX2B:PROP1:PRRX1:PRRX2:RAX:RAX2:SEBOX:SHOX:SHOX2:TLX1:TLX2:TLX3:U…	YTAATKRNN	0.01	-6.09	0.0189	154	50.00%	11057.3	41.76%
M05371_3.00:ARX:BARHL1:BARHL2:BARX1:BARX2:BSX:DLX1:DLX2:DLX3:DLX4:DLX5:DLX6:EMX1:EMX2:ESX1:EVX1:EVX2:GBX1:GBX2:HMX1:HMX2:HMX3:HOXA2:HOXB2:LBX1:LBX2:MEOX1:MEOX2:MNX1:MSX1:MSX2:NANOG:NANOGP8:NKX1-1:NKX1-2:PDX1:RAX:RAX2:TLX1:TLX2:TLX3:UNCX:VAX1:VAX2	CTAAACGG	0.01	-6.089	0.0189	58	18.83%	3425.7	12.94%
M10420_3.00:HNF4A:HNF4G:NR1H4:NR2C1:NR2C2:NR2F1:NR2F2:NR2F6:NR4A1:NR4A2:NR4A3:NR5A1:NR5A2:NR6A1:PPARA:PPARD:PPARG:RARA:RARB:RARG:RORA:RORB:RORC:RXRA:RXRB:RXRG:THRA	TSAGGTCACR	0.01	-6.079	0.0191	52	16.88%	2990.8	11.30%
M10453_3.00:HNF4A:HNF4G:NR1H4:NR2C1:NR2C2:NR2F1:NR2F2:NR2F6:NR4A1:NR4A2:NR4A3:NR5A1:NR5A2:NR6A1:PPARA:PPARD:PPARG:RARA:RARB:RARG:RORA:RORB:RORC:RXRA:RXRB:RXRG:THRA	TSAGGTCACR	0.01	-6.079	0.0191	52	16.88%	2990.8	11.30%
M00574_3.00:ALX1:ALX3:ALX4:ARX:BARX1:BARX2:BSX:DLX1:DLX2:DLX3:DLX4:DLX5:DLX6:DRGX:EMX1:EMX2:EN1:EN2:ESX1:EVX1:EVX2:GBX1:GBX2:GSX1:GSX2:HESX1:HMX1:HMX3:HOXA1:HOXA2:HOXA3:HOXA4:HOXA5:HOXB1:HOXB2:HOXB3:HOXB4:HOXB5:HOXC4:HOXC5:HOXD1:HOXD3:HOXD4:ISX:LHX2:LHX3:LHX4:LHX6:LHX8:LHX9:LMX1A:LMX1B:MEOX1:MIXL1:MNX1:MSX1:MSX2:NKX1-1:NKX1-2:NOBOX:NOTO:OTP:PDX1:PHOX2A:PHOX2B:PROP1:PRRX1:PRRX2:RAX:RAX2:SEBOX:SHOX…	NYAATYA	0.01	-6.076	0.0191	206	66.88%	15570.2	58.81%
M12500_3.00:EOMES:TBX2:TBX20:TBX3:TBX4:TBX5	AAGGTGTGAG	0.01	-6.074	0.0191	16	5.19%	602.5	2.28%
M00341_3.00:ALX1:ALX3:ALX4:ARX:BARX1:BARX2:BSX:DLX1:DLX2:DLX3:DLX4:DLX5:DLX6:DRGX:EMX1:EMX2:EN1:EN2:ESX1:EVX1:EVX2:GBX1:GBX2:GSX1:GSX2:HESX1:HOXA2:HOXA3:HOXB2:HOXB3:HOXD3:ISX:LBX1:LBX2:LHX1:LHX2:LHX3:LHX4:LHX5:LHX6:LHX8:LHX9:LMX1A:LMX1B:MEOX1:MIXL1:MNX1:MSX1:MSX2:NKX1-1:NKX1-2:NOBOX:NOTO:OTP:PDX1:PHOX2A:PHOX2B:PROP1:PRRX1:PRRX2:RAX:RAX2:SEBOX:SHOX:SHOX2:UNCX:VAX1:VAX2:VSX1:VSX2:ZFHX2:ZFHX3	HTAATTA	0.01	-6.071	0.0192	160	51.95%	11569.5	43.70%
M05588_3.00:CRX:DMBX1:DPRX:GSC:GSC2:OTX1:OTX2:PITX1:PITX2:PITX3:TPRX1	CTAATCCS	0.01	-6.067	0.0192	78	25.32%	4929.5	18.62%
M11272_3.00:KLF1:KLF12:KLF2:KLF3:KLF4:KLF5:KLF6:KLF7:KLF8	RGGGMGGGGS	0.01	-6.064	0.0193	86	27.92%	5546.5	20.95%
M11743_3.00:GTF2IRD1	GGGATTABG	0.01	-6.043	0.0196	84	27.27%	5395.3	20.38%
M08656_3.00:MYC	GCACGTGG	0.01	-6.042	0.0197	16	5.19%	604.2	2.28%
M05133_3.00:CRX:DMBX1:DPRX:GSC:GSC2:OTX1:OTX2:PITX1:PITX2:PITX3:TPRX1	BTAATCCN	0.01	-6.04	0.0197	102	33.12%	6807.3	25.71%
M04086_3.00:BARHL1:BARHL2:BSX:DLX2:EMX1:EMX2:EN1:EN2:GBX1:GBX2:GSX1:GSX2:HMX1:HMX2:HMX3:HOXA3:HOXA4:HOXA5:HOXB3:HOXB4:HOXB5:HOXC4:HOXC5:HOXD3:HOXD4:LBX2:MEOX1:MEOX2:MNX1:MSX1:MSX2:NANOG:NANOGP8:NKX1-1:NKX1-2:PDX1:TLX1:TLX2:TLX3:VAX1:VAX2:VENTX	BTAATTGB	0.01	-6.036	0.0197	98	31.82%	6491.4	24.52%
M06233_3.00:CTCF	WAGGGGGCGCTRKNGSG	0.01	-6.025	0.0199	4	1.30%	45.1	0.17%
M02175_3.00:ZHX1	HYACKBNN	0.01	-6.021	0.02	160	51.95%	11581.6	43.74%
M02863_3.00:ARX:BARHL1:BARHL2:BARX1:BARX2:BSX:DLX1:DLX2:DLX3:DLX4:DLX5:DLX6:EMX1:EMX2:ESX1:EVX1:EVX2:GBX1:GBX2:HMX1:HMX2:HMX3:HOXA2:HOXB2:LBX1:LBX2:MEOX1:MEOX2:MNX1:MSX1:MSX2:NANOG:NANOGP8:NKX1-1:NKX1-2:PDX1:RAX:RAX2:TLX1:TLX2:TLX3:UNCX:VAX1:VAX2	TAAACG	0.01	-6.003	0.0203	54	17.53%	3146.9	11.89%
M11618_3.00:ELF1:ELF2:ELF4:ELK1:ELK3:ELK4:ERF:ERG:ETS1:ETS2:ETV1:ETV2:ETV3:ETV3L:ETV4:ETV5:FEV:FLI1:GABPA	BVKACCGGAWGTNRGW	0.01	-6.002	0.0203	6	1.95%	112.2	0.42%
M10181_3.00:ELF1:ELF2:ELF4:ELK1:ELK3:ELK4:ERF:ERG:ETS1:ETS2:ETV1:ETV2:ETV3:ETV3L:ETV4:ETV5:FEV:FLI1:GABPA	GRVRGGAARMRGA	0.01	-6	0.0203	72	23.38%	4484.8	16.94%
M10197_3.00:ELF1:ELF2:ELF4:ELK1:ELK3:ELK4:ERF:ERG:ETS1:ETS2:ETV1:ETV2:ETV3:ETV3L:ETV4:ETV5:FEV:FLI1:GABPA	GRVRGGAARMRGA	0.01	-6	0.0203	72	23.38%	4484.8	16.94%
M08732_3.00:MZF1	TGGGGATT	0.01	-5.998	0.0204	24	7.79%	1088.8	4.11%
M03353_3.00:ALX1:ALX3:ALX4:ARX:BARHL1:BARHL2:BARX1:BARX2:BSX:DRGX:EMX1:EMX2:EN1:EN2:ESX1:EVX1:EVX2:GBX1:GBX2:GSX1:GSX2:HESX1:HOXA2:HOXA3:HOXB2:HOXB3:HOXD3:ISX:LBX1:LBX2:LHX1:LHX2:LHX3:LHX4:LHX5:LHX6:LHX8:LHX9:LMX1A:LMX1B:MEOX1:MEOX2:MIXL1:MNX1:MSX1:MSX2:NKX1-1:NKX1-2:NOBOX:NOTO:OTP:PDX1:PHOX2A:PHOX2B:PROP1:PRRX1:PRRX2:RAX:RAX2:SEBOX:SHOX:SHOX2:UNCX:VAX1:VAX2:VSX1:VSX2:ZFHX2	DYTAATTRRY	0.01	-5.996	0.0204	44	14.29%	2431.7	9.18%
M06701_3.00:IRX1:IRX3:IRX6	AAAWAACA	0.01	-5.991	0.0205	176	57.14%	12958.8	48.95%
M00335_3.00:ALX1:ALX3:ALX4:ARX:BARX1:BARX2:BSX:DLX1:DLX2:DLX3:DLX6:DRGX:EMX1:EMX2:EN1:EN2:ESX1:EVX1:EVX2:GBX1:GBX2:GSX1:GSX2:HESX1:HOXA2:HOXA3:HOXB2:HOXB3:HOXD3:ISX:LBX1:LBX2:LHX1:LHX2:LHX3:LHX4:LHX5:LHX6:LHX8:LHX9:LMX1A:LMX1B:MEOX1:MIXL1:MNX1:MSX1:MSX2:NKX1-1:NKX1-2:NOBOX:NOTO:OTP:PDX1:PHOX2A:PHOX2B:PROP1:PRRX1:PRRX2:RAX:RAX2:SEBOX:SHOX:SHOX2:UNCX:VAX1:VAX2:VSX1:VSX2:ZFHX2:ZFHX3	NTMCATAATTAMN	0.01	-5.974	0.0208	26	8.44%	1217	4.60%
M00855_3.00:ZNF740	NRTGGGGGGG	0.01	-5.966	0.0209	44	14.29%	2435.7	9.20%
M08617_3.00:ESR1:ESR2:ESRRA:ESRRB:ESRRG	RGBTCAAGGTCACSB	0.01	-5.96	0.021	6	1.95%	113.6	0.43%
M02251_3.00:ALX1:ALX3:ALX4:ARX:DRGX:EN1:EN2:ESX1:GBX1:GBX2:HESX1:ISX:LHX2:LHX3:LHX4:LHX6:LHX8:LHX9:LMX1A:LMX1B:MIXL1:MSX1:MSX2:NOTO:OTP:PHOX2A:PHOX2B:PROP1:PRRX1:PRRX2:RAX:RAX2:SEBOX:SHOX:SHOX2:UNCX:VSX1:VSX2:ZFHX2	VBTAATTAD	0.01	-5.959	0.021	104	33.77%	6983.3	26.38%
M09458_3.00:KLF15	GGGGCGGRGCVGGGG	0.01	-5.948	0.0213	14	4.55%	498.2	1.88%
M03462_3.00:ARX:BARHL1:BARHL2:BARX1:BARX2:BSX:DLX1:DLX2:DLX3:DLX4:DLX5:DLX6:EMX1:EMX2:ESX1:EVX1:EVX2:GBX1:GBX2:HMX1:HMX2:HMX3:HOXA2:HOXB2:LBX1:LBX2:MEOX1:MEOX2:MNX1:MSX1:MSX2:NANOG:NANOGP8:NKX1-1:NKX1-2:PDX1:RAX:RAX2:TLX1:TLX2:TLX3:UNCX:VAX1:VAX2	VHTAAACGNT	0.01	-5.947	0.0213	46	14.94%	2579.8	9.74%
M00515_3.00:ARX:BARHL1:BARHL2:BARX1:BARX2:BSX:DLX1:DLX2:DLX3:DLX4:DLX5:DLX6:EMX1:EMX2:ESX1:EVX1:EVX2:GBX1:GBX2:HMX1:HMX2:HMX3:HOXA2:HOXB2:LBX1:LBX2:MEOX1:MEOX2:MNX1:MSX1:MSX2:NANOG:NANOGP8:NKX1-1:NKX1-2:PDX1:RAX:RAX2:TLX1:TLX2:TLX3:UNCX:VAX1:VAX2	NTAAWYGNY	0.01	-5.936	0.0215	148	48.05%	10589.2	40.00%
M09011_3.00:ESR1:ESR2:ESRRA:ESRRB:ESRRG:NR1H2:NR1H3:NR2C2:NR2F1:NR2F2:NR2F6:RARA:RARB:RARG:RORA:RORB:RORC	CCAAGGTCAC	0.01	-5.912	0.022	20	6.49%	848.5	3.20%
M01886_3.00:ATF1:CREB1:CREM	TACGTCAY	0.01	-5.895	0.0223	32	10.39%	1618.6	6.11%
M05199_3.00:ALX1:ALX3:ALX4:ARX:DRGX:EN1:EN2:ESX1:ISX:LHX2:LHX3:LHX4:LHX6:LHX8:LHX9:LMX1A:LMX1B:MIXL1:OTP:PHOX2A:PHOX2B:PROP1:PRRX1:PRRX2:RAX:RAX2:SEBOX:SHOX:SHOX2:UNCX:VSX1:VSX2:ZFHX2	YTAACGAG	0.01	-5.895	0.0223	14	4.55%	502	1.90%
M08606_3.00:GLI2:GLI3	STGGGTGGTCY	0.01	-5.892	0.0223	10	3.25%	292	1.10%
M09442_3.00:FEZF1:FEZF2	VDVAAAAGRGCAGHN	0.01	-5.882	0.0225	34	11.04%	1754.1	6.63%
M11219_3.00:ZEB1:ZEB2	GGKGACACCTGSHTG	0.01	-5.877	0.0226	4	1.30%	47.1	0.18%
M08659_3.00:USF1:USF2	GTCACATGAC	0.01	-5.877	0.0226	6	1.95%	115.5	0.44%
M02611_3.00:LIN54	ATTTGAAA	0.01	-5.875	0.0226	80	25.97%	5118	19.33%
M01072_3.00:CEBPD	TTRCGCAA	0.01	-5.869	0.0227	22	7.14%	974.2	3.68%
M03343_3.00:HOXA10:HOXA11:HOXA9:HOXB9:HOXC10:HOXC11:HOXC12:HOXC9:HOXD10:HOXD11:HOXD12:HOXD9	WTTTTACGAC	0.01	-5.86	0.0229	14	4.55%	503.5	1.90%
M11623_3.00:EHF:ELF1:ELF2:ELF3:ELF4:ELF5:ETV6:ETV7:FEV	GCAGGAAV	0.01	-5.858	0.023	112	36.36%	7646	28.88%
M09359_3.00:ZNF845	NNNAGGGCAGAGNN	0.01	-5.846	0.0232	86	27.92%	5588.2	21.11%
M02972_3.00:TFAP2A:TFAP2B:TFAP2C:TFAP2D:TFAP2E	TGCCYBRGGGCA	0.01	-5.845	0.0232	12	3.90%	396.1	1.50%
M00545_3.00:CRX:DMBX1:GSC:OTX1:OTX2:TPRX1	NTAATCCNN	0.01	-5.839	0.0233	122	39.61%	8461.8	31.96%
M06585_3.00:ELF1:ELF2:ELF4:ELK1:ELK3:ELK4:ERF:ERG:ETS1:ETS2:ETV1:ETV2:ETV3:ETV3L:ETV4:ETV5:ETV6:FEV:FLI1:GABPA	ACCGGAAGT	0.01	-5.836	0.0234	6	1.95%	116.7	0.44%
M04555_3.00:MAF:MAFA:MAFB:MAFG:MAFK:NRL	HGTCAGCANWWTT	0.01	-5.835	0.0234	8	2.60%	200.4	0.76%
M04329_3.00:ARNTL	NKCACRTGAC	0.01	-5.831	0.0234	32	10.39%	1625.6	6.14%
M06697_3.00:ALX1:ALX3:ALX4:ARX:BARHL1:BARHL2:BSX:DLX1:DLX2:DLX3:DLX4:DLX5:DLX6:DRGX:EMX1:EMX2:EN1:EN2:ESX1:GBX1:GBX2:GSX1:GSX2:HESX1:HMX1:HMX2:HMX3:HOXA3:HOXB3:HOXD3:ISX:LBX1:LBX2:LHX1:LHX2:LHX3:LHX4:LHX5:LHX6:LHX8:LHX9:LMX1A:LMX1B:MEOX1:MIXL1:MSX1:MSX2:NKX1-1:NKX1-2:NOBOX:NOTO:OTP:PDX1:PHOX2A:PHOX2B:PROP1:PRRX1:PRRX2:RAX:RAX2:SEBOX:SHOX:SHOX2:UNCX:VAX1:VAX2:VSX1:VSX2:ZFHX2	TTTAATTA	0.01	-5.831	0.0234	32	10.39%	1625.8	6.14%
M01815_3.00:CCDC169-SOHLH2:SOHLH2	NGCACGKRCN	0.01	-5.822	0.0236	36	11.69%	1897.7	7.17%
M02162_3.00:CRX:DMBX1:GSC:GSC2:PITX1:PITX2:PITX3:RHOXF1	NTRATCC	0.01	-5.814	0.0238	232	75.32%	17991.6	67.96%
M05525_3.00:ALX1:ALX3:ALX4:ARX:BARHL1:BARHL2:DRGX:ESX1:GBX1:GBX2:HESX1:HMX1:HMX2:HMX3:ISX:LBX1:LBX2:MEOX1:MEOX2:MIXL1:MSX1:MSX2:PHOX2A:PHOX2B:PROP1:PRRX1:PRRX2:RAX:RAX2:SHOX:SHOX2:TLX2:UNCX:VENTX:VSX1:VSX2	TTAACGAG	0.01	-5.809	0.0239	40	12.99%	2176	8.22%
M01229_3.00:ATF2	NKACGTCATN	0.01	-5.807	0.0239	56	18.18%	3322.5	12.55%
M11073_3.00:ATF1:CREB1:CREM	NNNTKACGTCASBNN	0.01	-5.804	0.024	26	8.44%	1233.6	4.66%
M06034_3.00:SKOR1	NAACTGTAATTAAB	0.01	-5.795	0.0242	6	1.95%	118	0.45%
M04537_3.00:FOS:FOSB:FOSL1:FOSL2	SATGAWTCATC	0.01	-5.786	0.0244	12	3.90%	399.5	1.51%
M08739_3.00:ZNF85	TGMTGTAATCTC	0.01	-5.776	0.0246	8	2.60%	202.6	0.77%
M09601_3.00:ASH1L:HMGA1:HMGA2:SETBP1:SRCAP	GYGWCASWAAA	0.01	-5.774	0.0246	22	7.14%	982.9	3.71%
M10374_3.00:BORCS8-MEF2B:MEF2A:MEF2B:MEF2C:MEF2D	GTTKCTATTTTTRG	0.01	-5.77	0.0247	40	12.99%	2180.5	8.24%
M04002_3.00:ALX1:ALX3:ALX4:ARX:BARHL1:BARHL2:BARX1:BARX2:BSX:DLX1:DLX2:DLX3:DLX4:DLX5:DLX6:DRGX:EMX1:EMX2:EN1:EN2:ESX1:EVX1:EVX2:GBX1:GBX2:GSX1:GSX2:HESX1:HMX1:HMX3:HOXA1:HOXA2:HOXA3:HOXA4:HOXA5:HOXB1:HOXB2:HOXB3:HOXB4:HOXB5:HOXC4:HOXC5:HOXD1:HOXD3:HOXD4:ISX:MEOX1:MEOX2:MIXL1:MNX1:MSX1:MSX2:NKX1-1:NKX1-2:NOTO:OTP:PDX1:PHOX2A:PHOX2B:PROP1:PRRX1:PRRX2:RAX:RAX2:SEBOX:SHOX:SHOX2:TLX1:TLX2:TLX3:UNCX:V…	SSTAATTAGB	0.01	-5.762	0.0249	26	8.44%	1237.7	4.68%
M00214_3.00:ELF1:ELF2:ELF4:SPDEF	WNCCGGATNY	0.01	-5.761	0.0249	52	16.88%	3037.8	11.47%
M03370_3.00:ARX:BARHL1:BARHL2:BARX1:BARX2:BSX:DLX1:DLX2:DLX3:DLX4:DLX5:DLX6:EMX2:EN1:EN2:GBX1:GBX2:GSX1:GSX2:HOXA1:HOXA2:HOXA3:HOXB1:HOXB2:HOXB3:HOXD1:HOXD3:ISX:LHX1:LHX5:MEOX1:MNX1:MSX1:MSX2:NANOG:NANOGP8:NKX1-1:NKX1-2:PDX1:PHOX2A:PHOX2B:PROP1:SHOX:SHOX2:UNCX:VAX1:VAX2:VSX2	SNTAATTABB	0.01	-5.757	0.0249	104	33.77%	7027	26.54%
M10654_3.00:ELF1:ELF2:ELF4:ELK1:ELK3:ELK4:ERF:ERG:ETS1:ETS2:ETV1:ETV2:ETV3:ETV3L:ETV4:ETV5:FEV:FLI1:GABPA	RCCGGAAGTD	0.01	-5.75	0.0251	22	7.14%	984.6	3.72%
M10991_3.00:USF1:USF2	WDRHCACGTGDYHW	0.01	-5.741	0.0253	14	4.55%	510.3	1.93%
M00496_3.00:CRX:DMBX1:DPRX:GSC:GSC2:OTX1:OTX2:PITX1:PITX2:PITX3:TPRX1	HTAATCCBN	0.01	-5.74	0.0253	112	36.36%	7672.8	28.98%
M01568_3.00:ELF1:ELF2:ELF4:ELK1:ELK3:ELK4:ERF:ERG:ETS1:ETS2:ETV1:ETV2:ETV3:ETV3L:ETV4:ETV5:FEV:FLI1:GABPA	NACCGGAARY	0.01	-5.734	0.0254	52	16.88%	3041.4	11.49%
M04355_3.00:HAND2	YGCAGGTGTT	0.01	-5.733	0.0254	28	9.09%	1370.6	5.18%
M10261_3.00:NKX3-1:NKX3-2	TTAAGTGBTT	0.01	-5.732	0.0254	16	5.19%	624.9	2.36%
M10335_3.00:NKX3-1:NKX3-2	TTAAGTGBTT	0.01	-5.732	0.0254	16	5.19%	624.9	2.36%
M05357_3.00:ALX1:ALX3:ALX4:ARX:DRGX:EN1:EN2:ESX1:HESX1:ISX:LHX2:LHX3:LHX4:LHX6:LHX8:LHX9:LMX1A:LMX1B:MIXL1:NOBOX:OTP:PHOX2A:PHOX2B:PROP1:PRRX1:PRRX2:RAX:RAX2:SEBOX:SHOX:SHOX2:UNCX:VSX1:VSX2:ZFHX2	VHTTTAATTAH	0.01	-5.731	0.0254	26	8.44%	1240.1	4.68%
M11861_3.00:SIX1:SIX2:SIX4:SIX5	CTACAAYTC	0.01	-5.729	0.0254	10	3.25%	299.2	1.13%
M08838_3.00:EHF:ELF1:ELF2:ELF3:ELF4:ELF5:ELK1:ELK3:ELK4:ERF:ERG:ETS1:ETS2:ETV1:ETV2:ETV3:ETV3L:ETV4:ETV5:ETV6:ETV7:FEV:FLI1:GABPA:SPDEF	CAGGAAGTG	0.01	-5.727	0.0255	22	7.14%	986.5	3.73%
M12062_3.00:BORCS8-MEF2B:MEF2A:MEF2B:MEF2C:MEF2D	RGCTATTTTTAR	0.01	-5.719	0.0256	8	2.60%	204.8	0.77%
M04950_3.00:EHF:ELF1:ELF2:ELF3:ELF4:ELF5:ELK1:ELK3:ELK4:ERF:ERG:ETS1:ETS2:ETV1:ETV2:ETV3:ETV3L:ETV4:ETV5:ETV6:ETV7:FEV:FLI1:GABPA:SPDEF	AACCCGGAAGTR	0.01	-5.715	0.0257	6	1.95%	119.8	0.45%
M02205_3.00:CRX:DMBX1:DPRX:GSC:GSC2:OTX1:OTX2:PITX1:PITX2:PITX3:TPRX1	YTAATCCNN	0.01	-5.699	0.0261	102	33.12%	6879.4	25.98%
M06630_3.00:ALX1:ALX3:ALX4:ARX:BARHL1:BARHL2:BARX1:BARX2:BSX:DRGX:EMX1:EMX2:EN1:EN2:ESX1:EVX1:EVX2:GBX1:GBX2:GSX1:GSX2:HESX1:HMX1:HMX2:HMX3:HOXA1:HOXA2:HOXA3:HOXA4:HOXA5:HOXB1:HOXB2:HOXB3:HOXB4:HOXB5:HOXC4:HOXC5:HOXD3:HOXD4:LHX2:LHX3:LHX4:LHX9:MEOX1:MEOX2:MIXL1:MNX1:MSX1:MSX2:NKX1-1:NKX1-2:NOTO:OTP:PDX1:PHOX2A:PHOX2B:PROP1:PRRX1:PRRX2:RAX:RAX2:SEBOX:SHOX:SHOX2:TLX1:TLX2:TLX3:UNCX:VAX1:VAX2:VENTX:…	TGTCATHA	0.01	-5.698	0.0261	90	29.22%	5930.3	22.40%
M00729_3.00:CRX:DMBX1:DPRX:GSC:GSC2:OTX1:OTX2:PITX1:PITX2:PITX3:TPRX1	WTAATCCB	0.01	-5.689	0.0263	92	29.87%	6089.4	23.00%
M01326_3.00:NKX6-1:NKX6-2:NKX6-3	NWTAATKAN	0.01	-5.68	0.0265	140	45.45%	9982.8	37.71%
M02069_3.00:FOXC2:FOXD1:FOXD2:FOXD3:FOXG1:FOXI1:FOXI2:FOXI3:FOXJ2:FOXJ3:FOXK1:FOXK2:FOXP1:FOXP3	NNTGTTKNB	0.01	-5.677	0.0266	228	74.03%	17656.1	66.69%
M04532_3.00:FOS:FOSB:FOSL1:FOSL2	GATGACRTCATC	0.01	-5.676	0.0266	6	1.95%	120.1	0.45%
M12014_3.00:IRF4:IRF8	TGAAACT	0.01	-5.672	0.0267	124	40.26%	8663.8	32.72%
M06137_3.00:ZBTB5	NASTVGATCNCNNN	0.01	-5.669	0.0267	40	12.99%	2193.8	8.29%
M11114_3.00:FOS:FOSB:FOSL1:FOSL2	TGGTGAGT	0.01	-5.668	0.0267	22	7.14%	991.1	3.74%
M09203_3.00:ZNF70	AGGGAGGM	0.01	-5.666	0.0268	152	49.35%	10991.8	41.52%
M08543_3.00:ZNF404	GAGACRGAGTCTCRC	0.01	-5.654	0.0271	64	20.78%	3941.9	14.89%
M08637_3.00:TFAP2A:TFAP2B:TFAP2C:TFAP2D:TFAP2E	GCCTGAGGC	0.01	-5.648	0.0272	26	8.44%	1248.6	4.72%
M10949_3.00:EPAS1:HIF1A	VDGCACGTMC	0.01	-5.648	0.0272	26	8.44%	1248.8	4.72%
M02244_3.00:ALX1:ALX3:ALX4:ARX:BARX1:BSX:DRGX:EMX1:EMX2:EN1:EN2:ESX1:EVX1:EVX2:GBX1:GBX2:HESX1:HOXA2:HOXB2:ISX:LBX1:LBX2:LHX1:LHX2:LHX3:LHX4:LHX5:LHX6:LHX8:LHX9:LMX1A:LMX1B:MEOX1:MIXL1:MNX1:MSX1:MSX2:NKX1-1:NKX1-2:NOBOX:NOTO:OTP:PHOX2A:PHOX2B:PROP1:PRRX1:PRRX2:RAX:RAX2:SEBOX:SHOX:SHOX2:UNCX:VAX1:VAX2:VSX1:VSX2:ZFHX2	CTAATTAA	0.01	-5.647	0.0272	36	11.69%	1918.2	7.25%
M10955_3.00:TWIST1:TWIST2	CCAGGTG	0.01	-5.645	0.0272	114	37.01%	7855.3	29.67%
M11373_3.00:SP2	GGGCGGGAC	0.01	-5.638	0.0274	10	3.25%	303.1	1.14%
M09515_3.00:ZNF492:ZNF98	AAAAGGACAASAAAAAGGCAA	0.01	-5.632	0.0275	12	3.90%	407.5	1.54%
M10289_3.00:HOXA3:HOXA4:HOXA5:HOXA6:HOXA7:HOXB3:HOXB4:HOXB5:HOXB6:HOXB7:HOXB8:HOXC4:HOXC5:HOXC6:HOXC8:HOXD3:HOXD4:HOXD8:PDX1	CATYAATCAA	0.01	-5.632	0.0275	12	3.90%	407.3	1.54%
M10329_3.00:HOXA3:HOXA4:HOXA5:HOXA6:HOXA7:HOXB3:HOXB4:HOXB5:HOXB6:HOXB7:HOXB8:HOXC4:HOXC5:HOXC6:HOXC8:HOXD3:HOXD4:HOXD8:PDX1	CATYAATCAA	0.01	-5.632	0.0275	12	3.90%	407.3	1.54%
M09602_3.00:ASH1L:HMGA1:HMGA2:SETBP1:SRCAP	AAAAATTTT	0.01	-5.63	0.0275	122	39.61%	8509.4	32.14%
M02296_3.00:HOXA10:HOXA6:HOXA7:HOXA9:HOXB6:HOXB7:HOXB8:HOXB9:HOXC10:HOXC6:HOXC8:HOXC9:HOXD10:HOXD8:HOXD9	NATAATWATR	0.01	-5.624	0.0276	56	18.18%	3351.5	12.66%
M07972_3.00:CTCF	AAAAATAAAAA	0.01	-5.613	0.0279	110	35.71%	7539.4	28.48%
M05202_3.00:CRX:DMBX1:DPRX:GSC:GSC2:OTX1:OTX2:PITX1:PITX2:PITX3:TPRX1	CTAATCCC	0.01	-5.608	0.028	82	26.62%	5324.2	20.11%
M05071_3.00:GATA1:GATA2:GATA3:GATA4:GATA5:GATA6	BWGATAASGN	0.01	-5.605	0.0281	34	11.04%	1786.2	6.75%
M08033_3.00:ZNF202	GGASGMGG	0.01	-5.597	0.0283	32	10.39%	1651.5	6.24%
M01899_3.00:CEBPG	TKDYGCAAYN	0.01	-5.588	0.0285	106	34.42%	7223.6	27.28%
M06133_3.00:ZBTB8A	NNNNNHDNNGGGCGYHN	0.01	-5.586	0.0285	38	12.34%	2064.1	7.80%
M04743_3.00:KLF13:KLF9	RGKGGGCGTGGYN	0.01	-5.583	0.0286	16	5.19%	634.5	2.40%
M04888_3.00:DMRT1:DMRT2:DMRT3:DMRTA2:DMRTB1:DMRTC2	AATYGCTACATN	0.01	-5.583	0.0286	16	5.19%	635	2.40%
M04253_3.00:TFAP2A:TFAP2B:TFAP2C:TFAP2D:TFAP2E	NSCCTNAGGSV	0.01	-5.579	0.0287	62	20.13%	3804.4	14.37%
M04263_3.00:MITF:TFE3	NGTCACATGBY	0.01	-5.575	0.0287	12	3.90%	410.8	1.55%
M06382_3.00:BHLHE22:BHLHE23	GACAGATGGTVVGKT	0.01	-5.56	0.0291	6	1.95%	123.5	0.47%
M08422_3.00:GATA1:GATA2:GATA3:GATA4:GATA5:GATA6	STGGNNNVNNSAGATAAG	0.01	-5.56	0.0291	6	1.95%	123.7	0.47%
M10709_3.00:PAX3:PAX7	HWWNNTAATTRGCHAATTAN	0.01	-5.56	0.0291	6	1.95%	123.5	0.47%
M12260_3.00:ESR1:ESR2:NR1D1:NR1D2:NR1H2:NR1H3:NR1H4:NR2C1:NR2C2:NR2F1:NR2F2:NR2F6:NR4A1:NR5A2:NR6A1:PPARA:PPARD:PPARG:RARA:RARB:RARG:RORA:RORB:RORC:RXRA:RXRB:RXRG	AAAGGTCAVN	0.01	-5.556	0.0292	74	24.03%	4717.5	17.82%
M05573_3.00:ARGFX	TTTAATTAGM	0.01	-5.547	0.0294	18	5.84%	755.9	2.86%
M03061_3.00:MAF:MAFA:MAFB:MAFG:MAFK	GTCAGCAWWWTT	0.01	-5.539	0.0297	16	5.19%	637.3	2.41%
M00551_3.00:NKX2-1:NKX2-2:NKX2-3:NKX2-4:NKX2-5:NKX2-6:NKX2-8	TYAAGTGSNY	0.01	-5.532	0.0298	70	22.73%	4416.8	16.68%
M01079_3.00:CEBPG	NTTACGCAA	0.01	-5.527	0.0299	32	10.39%	1659.1	6.27%
M05285_3.00:HOXA10:HOXA11:HOXA9:HOXB9:HOXC10:HOXC11:HOXC12:HOXC9:HOXD10:HOXD11:HOXD12:HOXD9	NTTTTACGACS	0.01	-5.523	0.03	8	2.60%	211.2	0.80%
M06026_3.00:TBX1:TBX10	KNAGGTGTGAAW	0.01	-5.521	0.0301	24	7.79%	1131.9	4.28%
M04463_3.00:ATF1:CREB1:CREM	TACGTCACN	0.01	-5.519	0.0301	12	3.90%	413.6	1.56%
M05571_3.00:ALX1:ALX3:ALX4:ARX:BARX1:BARX2:BSX:DLX1:DLX2:DLX3:DLX4:DLX5:DLX6:DRGX:EMX1:EMX2:EN1:EN2:ESX1:EVX1:EVX2:GBX1:GBX2:GSX1:GSX2:HESX1:HOXA1:HOXA2:HOXA3:HOXB1:HOXB2:HOXB3:HOXD3:ISL1:ISL2:ISX:LBX1:LBX2:LHX1:LHX2:LHX3:LHX4:LHX5:LHX6:LHX8:LHX9:LMX1A:LMX1B:MEOX1:MIXL1:MNX1:MSX1:MSX2:NKX1-1:NKX1-2:NOBOX:NOTO:OTP:PDX1:PHOX2A:PHOX2B:PROP1:PRRX1:PRRX2:RAX:RAX2:SEBOX:SHOX:SHOX2:UNCX:VAX1:VAX2:VSX1:V…	CTAATTAV	0.01	-5.511	0.0303	44	14.29%	2497.5	9.43%
M12380_3.00:RUNX1:RUNX2:RUNX3	ACCACAAA	0.01	-5.51	0.0303	54	17.53%	3222.7	12.17%
M06736_3.00:ALX1:ALX3:ALX4:ARX:BARHL1:BARHL2:BARX1:BARX2:BSX:DLX2:DLX3:DRGX:EMX1:EMX2:EN1:EN2:ESX1:EVX1:EVX2:GBX1:GBX2:GSX1:GSX2:HESX1:HMX2:HOXA2:HOXA3:HOXA4:HOXA5:HOXB1:HOXB2:HOXB3:HOXB4:HOXB5:HOXC4:HOXD3:HOXD4:ISX:MEOX1:MEOX2:MIXL1:MNX1:MSX1:MSX2:NKX1-1:NKX1-2:OTP:PDX1:PHOX2A:PHOX2B:PROP1:PRRX1:PRRX2:RAX:RAX2:SHOX:SHOX2:TLX1:TLX2:TLX3:UNCX:VAX1:VAX2:VENTX:VSX1:VSX2	NTTAATTGSY	0.01	-5.508	0.0304	72	23.38%	4574	17.28%
M11619_3.00:ELF1:ELF2:ELF4:ELK1:ELK3:ELK4:ERF:ERG:ETS1:ETS2:ETV1:ETV2:ETV3:ETV3L:ETV4:ETV5:FEV:FLI1:GABPA	AGGAAGT	0.01	-5.506	0.0304	92	29.87%	6127.6	23.14%
M00486_3.00:ALX1:ALX3:ALX4:ARX:BARX1:BARX2:BSX:DLX2:DLX3:DRGX:EMX1:EMX2:EN1:EN2:ESX1:EVX1:EVX2:GBX1:GBX2:GSX1:GSX2:HESX1:HOXA2:HOXA3:HOXB2:HOXB3:HOXD3:ISX:LBX1:LBX2:LHX1:LHX2:LHX3:LHX4:LHX5:LHX6:LHX8:LHX9:LMX1A:LMX1B:MEOX1:MIXL1:MNX1:MSX1:MSX2:NKX1-1:NKX1-2:NOBOX:NOTO:OTP:PDX1:PHOX2A:PHOX2B:PROP1:PRRX1:PRRX2:RAX:RAX2:SEBOX:SHOX:SHOX2:UNCX:VAX1:VAX2:VSX1:VSX2:ZFHX2	NYTAATTA	0.01	-5.502	0.0305	108	35.06%	7403.2	27.96%
M10629_3.00:EGR1:EGR2:EGR3:EGR4	TGCGTGGGYG	0.01	-5.496	0.0306	20	6.49%	881.9	3.33%
M09881_3.00:NEUROG2:NEUROG3	GSARCAGATGGY	0.01	-5.495	0.0306	16	5.19%	640.8	2.42%
M02748_3.00:BHLHA15	ACCATATGGT	0.01	-5.485	0.0309	6	1.95%	125.9	0.48%
M06269_3.00:HNF4G:NR1H4:NR2C1:NR2C2:NR2F1:NR2F2:NR2F6:NR4A1:NR4A2:NR4A3:NR5A1:NR5A2:NR6A1:PPARA:PPARD:PPARG:RARA:RARB:RARG:RORA:RORB:RORC:RXRA:RXRB:RXRG:THRA:THRB	RRGGTCAAAGGTCAH	0.01	-5.485	0.0309	6	1.95%	126	0.48%
M10342_3.00:POU2F1	WTRTTTSCATTCSATT	0.01	-5.485	0.0309	6	1.95%	125.6	0.47%
M00481_3.00:ALX1:ALX3:ALX4:ARX:BARHL1:BARHL2:BARX1:BARX2:BSX:DRGX:EMX1:EMX2:EN1:EN2:ESX1:EVX1:EVX2:GBX1:GBX2:GSX1:GSX2:HESX1:HOXA2:HOXA3:HOXB2:HOXB3:HOXD3:ISX:LBX1:LBX2:LHX1:LHX2:LHX3:LHX4:LHX5:LHX6:LHX8:LHX9:LMX1A:LMX1B:MEOX1:MEOX2:MIXL1:MNX1:MSX1:MSX2:NKX1-1:NKX1-2:NOBOX:NOTO:OTP:PDX1:PHOX2A:PHOX2B:PROP1:PRRX1:PRRX2:RAX:RAX2:SEBOX:SHOX:SHOX2:UNCX:VAX1:VAX2:VSX1:VSX2:ZFHX2	NNTAATTRR	0.01	-5.471	0.0313	108	35.06%	7410.3	27.99%
M10201_3.00:ELF1:ELF2:ELF4:ELK1:ELK3:ELK4:ERF:ERG:ETS1:ETS2:ETV1:ETV2:ETV3:ETV3L:ETV4:ETV5:FEV:FLI1:GABPA	GRGRCAGGAAGTGG	0.01	-5.469	0.0313	8	2.60%	213.2	0.81%
M00902_3.00:TBX2:TBX20:TBX3:TBX4:TBX5	AGGTGTKA	0.01	-5.455	0.0317	44	14.29%	2506	9.47%
M04433_3.00:ATF1:CREB1:CREM	NVTGACGTCAYS	0.01	-5.447	0.032	24	7.79%	1138.1	4.30%
M03478_3.00:HOXA10:HOXA11:HOXA9:HOXB9:HOXC10:HOXC11:HOXC12:HOXC9:HOXD10:HOXD11:HOXD12:HOXD9	ANTTTTACGACC	0.01	-5.442	0.0321	8	2.60%	214.8	0.81%
M11651_3.00:FOXI1:FOXI2:FOXI3:FOXJ1:FOXJ2:FOXJ3:FOXK2:FOXP3	ATMATAATATTTTT	0.01	-5.442	0.0321	8	2.60%	214.6	0.81%
M05088_3.00:GCM1:GCM2	YACCCNCAT	0.01	-5.436	0.0322	88	28.57%	5827.8	22.01%
M05823_3.00:NR1I2:NR1I3:VDR	AAAGTTCAT	0.01	-5.435	0.0322	26	8.44%	1269.2	4.79%
M02570_3.00:SOX1:SOX10:SOX11:SOX12:SOX13:SOX14:SOX15:SOX17:SOX18:SOX2:SOX21:SOX3:SOX30:SOX4:SOX5:SOX6:SOX7:SOX8:SOX9:SRY	HNTTGTNNNN	0.01	-5.419	0.0327	244	79.22%	19201	72.52%
M00497_3.00:ALX1:ALX3:ALX4:ARX:BARHL1:BARHL2:BARX1:BARX2:BSX:DLX1:DLX2:DLX3:DLX4:DLX5:DLX6:DRGX:EMX1:EMX2:EN1:EN2:ESX1:EVX1:EVX2:GBX1:GBX2:GSX1:GSX2:HESX1:HMX1:HMX3:HOXA1:HOXA2:HOXA3:HOXA4:HOXA5:HOXB1:HOXB2:HOXB3:HOXB4:HOXB5:HOXC4:HOXC5:HOXD1:HOXD3:HOXD4:ISX:MEOX1:MEOX2:MIXL1:MNX1:MSX1:MSX2:NKX1-1:NKX1-2:NOTO:OTP:PDX1:PHOX2A:PHOX2B:PROP1:PRRX1:PRRX2:RAX:RAX2:SEBOX:SHOX:SHOX2:TLX1:TLX2:TLX3:UNCX:V…	NHTAATTRNN	0.01	-5.417	0.0327	124	40.26%	8723.2	32.95%
M03248_3.00:FOXC1:FOXC2:FOXD1:FOXD2:FOXD3:FOXD4:FOXD4L1:FOXD4L3:FOXD4L4:FOXD4L5:FOXD4L6:FOXE1:FOXE3:FOXF1:FOXF2:FOXG1:FOXI1:FOXI2:FOXI3:FOXJ3:FOXL1:FOXL2:FOXS1	WRHTAATATTTACW	0.01	-5.413	0.0329	14	4.55%	530.5	2.00%
M08252_3.00:MAX	GGGTCACGTGGBS	0.01	-5.411	0.0329	6	1.95%	127.1	0.48%
M12470_3.00:CIC:SOX1:SOX10:SOX11:SOX12:SOX13:SOX14:SOX15:SOX17:SOX18:SOX2:SOX21:SOX3:SOX4:SOX5:SOX6:SOX7:SOX8:SOX9:SRY	AACAATRGR	0.01	-5.396	0.0334	28	9.09%	1405.6	5.31%
M12223_3.00:ESR1:ESR2:ESRRA:ESRRB:ESRRG:NR1H2:NR1H3:NR2C2:NR2F1:NR2F2:NR2F6:RARA:RARB:RARG:RORA:RORB:RORC	BRGGTCA	0.01	-5.39	0.0335	120	38.96%	8402.6	31.74%
M11558_3.00:DMRTA1	AATGTADCAAWTT	0.01	-5.388	0.0336	8	2.60%	216.7	0.82%
M01766_3.00:ASH1L:HMGA1:HMGA2:SETBP1:SRCAP	NNAATATTAATT	0.01	-5.382	0.0338	40	12.99%	2232	8.43%
M03414_3.00:ALX1:ALX3:ALX4:ARX:BARHL1:BARHL2:BARX1:BARX2:BSX:DLX1:DLX2:DLX3:DLX6:DRGX:EMX1:EMX2:EN1:EN2:ESX1:EVX1:EVX2:GBX1:GBX2:GSX1:GSX2:HESX1:HMX1:HMX2:HMX3:HOXA1:HOXA2:HOXA3:HOXA4:HOXA5:HOXB1:HOXB2:HOXB3:HOXB4:HOXB5:HOXC4:HOXC5:HOXD3:HOXD4:LHX2:LHX3:LHX4:LHX9:MEOX1:MEOX2:MIXL1:MNX1:MSX1:MSX2:NKX1-1:NKX1-2:NOTO:OTP:PDX1:PHOX2A:PHOX2B:PROP1:PRRX1:PRRX2:RAX:RAX2:SEBOX:SHOX:SHOX2:TLX1:TLX2:TLX3:U…	VCTAATTASB	0.01	-5.377	0.0339	28	9.09%	1407.3	5.32%
M07950_3.00:PRDM9	RGKGGGMAGGGRGGVRRCAG	0.01	-5.375	0.0339	6	1.95%	128.1	0.48%
M09192_3.00:ZNF721	AARAAAAMAGYRTYTCC	0.01	-5.375	0.0339	6	1.95%	128.9	0.49%
M11845_3.00:CRX:DMBX1:DPRX:GSC:GSC2:OTX1:OTX2:PITX1:PITX2:PITX3:TPRX1	TGGGATTACA	0.01	-5.374	0.0339	86	27.92%	5683.7	21.47%
M05512_3.00:ALX1:ALX3:ALX4:ARX:BARX1:BARX2:BSX:DLX1:DLX2:DLX3:DLX4:DLX5:DLX6:DRGX:EN1:EN2:ESX1:GBX1:GBX2:GSX1:GSX2:HESX1:HOXA1:HOXA2:HOXA3:HOXA4:HOXA5:HOXB1:HOXB2:HOXB3:HOXB4:HOXB5:HOXC4:HOXC5:HOXD3:HOXD4:ISX:LBX2:LHX1:LHX2:LHX3:LHX4:LHX5:LHX6:LHX8:LHX9:LMX1A:LMX1B:MEOX1:MIXL1:MNX1:MSX1:MSX2:NKX1-1:NKX1-2:NOBOX:NOTO:OTP:PDX1:PHOX2A:PHOX2B:PROP1:PRRX1:PRRX2:RAX:RAX2:SEBOX:SHOX:SHOX2:UNCX:VAX1:VAX2…	TTAATTAG	0.01	-5.373	0.0339	36	11.69%	1952.7	7.38%
M11951_3.00:POU2F1	NDSRTAATSABDW	0.01	-5.373	0.0339	36	11.69%	1952.1	7.37%
M12175_3.00:MYB:MYBL1	YAACTGNCNSY	0.01	-5.371	0.0339	44	14.29%	2517.9	9.51%
M02102_3.00:GCM1:GCM2	RCCCGCATN	0.01	-5.37	0.0339	70	22.73%	4447	16.80%
M06190_3.00:NR1H2:NR1H3:NR1H4:NR2C1:NR2C2:NR2F1:NR2F2:NR2F6:RARA:RARB:RARG:RORA:RORB:RORC:RXRA:RXRB:RXRG:VDR	AGGTCA	0.01	-5.368	0.0339	68	22.08%	4294.1	16.22%
M12766_3.00:NR1H2:NR1H3:NR1H4:NR2C1:NR2C2:NR2F1:NR2F2:NR2F6:RARA:RARB:RARG:RORA:RORB:RORC:RXRA:RXRB:RXRG:VDR	AGGTCA	0.01	-5.368	0.0339	68	22.08%	4294.1	16.22%
M11303_3.00:BCL6	AAAGHWWWNYHDVWWA	0.01	-5.367	0.0339	104	33.77%	7112.2	26.86%
M12531_3.00:TEAD1:TEAD3:TEAD4	CATTCC	0.01	-5.364	0.034	138	44.81%	9893.7	37.37%
M03678_3.00:GMEB1:GMEB2	TTACGTAA	0.01	-5.359	0.0342	28	9.09%	1410	5.33%
M09172_3.00:ZFP3	AAWRAAMAAGTTN	0.01	-5.348	0.0345	56	18.18%	3396.3	12.83%
M11843_3.00:CRX:DMBX1:DPRX:GSC:GSC2:OTX1:OTX2:PITX1:PITX2:PITX3:TPRX1	YTGGGATTAHA	0.01	-5.341	0.0347	74	24.03%	4758.2	17.97%
M08258_3.00:MYC	GMSCACGTGGC	0.01	-5.333	0.0349	10	3.25%	317.2	1.20%
M00514_3.00:ALX1:ALX3:ALX4:ARX:BARX1:BARX2:BSX:DLX2:DLX3:DRGX:EMX1:EMX2:EN1:EN2:ESX1:EVX1:EVX2:GBX1:GBX2:GSX1:GSX2:HESX1:HOXA2:HOXA3:HOXB2:HOXB3:HOXD3:ISL1:ISL2:ISX:LBX1:LBX2:LHX1:LHX2:LHX3:LHX4:LHX5:LHX6:LHX8:LHX9:LMX1A:LMX1B:MEOX1:MIXL1:MNX1:MSX1:MSX2:NKX1-1:NKX1-2:NOBOX:NOTO:OTP:PDX1:PHOX2A:PHOX2B:PROP1:PRRX1:PRRX2:RAX:RAX2:SEBOX:SHOX:SHOX2:UNCX:VAX1:VAX2:VSX1:VSX2:ZFHX2:ZFHX3	NNTAATTRV	0.01	-5.329	0.0351	144	46.75%	10403.3	39.29%
M06678_3.00:CRX:DMBX1:DPRX:GSC:GSC2:OTX1:OTX2:PITX1:PITX2:PITX3:TPRX1	TTAATCC	0.01	-5.324	0.0352	78	25.32%	5070.8	19.15%
M06179_3.00:TET3	NBNACGTR	0.01	-5.318	0.0354	202	65.58%	15404.8	58.19%
M00734_3.00:CRX:DMBX1:DPRX:GSC:GSC2:OTX1:OTX2:PITX1:PITX2:PITX3:TPRX1	TTAATCCB	0.01	-5.308	0.0357	92	29.87%	6170	23.30%
M12447_3.00:SOX1:SOX10:SOX11:SOX12:SOX13:SOX14:SOX15:SOX17:SOX18:SOX2:SOX21:SOX3:SOX30:SOX4:SOX5:SOX6:SOX7:SOX8:SOX9:SRY	RRACAA	0.01	-5.293	0.0362	196	63.64%	14880	56.20%
M11167_3.00:MAF:MAFA:MAFB:MAFG:MAFK:NRL	YMKHHRMGTCAGCAMWWWM	0.01	-5.289	0.0363	4	1.30%	56.3	0.21%
M05337_3.00:RHOXF2:RHOXF2B	CTAATCCC	0.01	-5.289	0.0363	78	25.32%	5078	19.18%
M03410_3.00:HOXA10:HOXA11:HOXC10:HOXC11:HOXC12:HOXD10:HOXD11:HOXD12:MEOX2	TTTTATTAC	0.01	-5.286	0.0364	38	12.34%	2103.1	7.94%
M02891_3.00:ESR1:ESR2:NR1D1:NR1D2:NR1H2:NR1H3:NR1H4:NR2C1:NR2C2:NR2F1:NR2F2:NR2F6:NR4A1:NR4A2:NR4A3:NR5A1:NR5A2:NR6A1:PPARA:PPARD:PPARG:RARA:RARB:RARG:RORA:RORB:RORC:RXRA:RXRB:RXRG:THRA:THRB	ATCAAGGTCA	0.01	-5.27	0.0369	24	7.79%	1155.7	4.37%
M11609_3.00:EHF:ELF1:ELF2:ELF3:ELF4:ELF5:ELK1:ELK3:ELK4:ERF:ERG:ETS1:ETS2:ETV1:ETV2:ETV3:ETV3L:ETV4:ETV5:ETV6:ETV7:FEV:FLI1:GABPA:SPDEF	AGGAAG	0.01	-5.263	0.0372	112	36.36%	7781.9	29.39%
M08665_3.00:TCF12:TCF3:TCF4	GCAGGTGC	0.01	-5.263	0.0372	58	18.83%	3559.6	13.44%
M00570_3.00:GSC:TPRX1	WTAATCCCHN	0.01	-5.26	0.0372	84	27.27%	5550.5	20.96%
M09045_3.00:ZNF415	GGGTGCTGGAGCCRG	0.01	-5.258	0.0372	8	2.60%	221.3	0.84%
M11326_3.00:RREB1	GGGGTGGTTTGGGG	0.01	-5.258	0.0372	8	2.60%	221.8	0.84%
M10755_3.00:RUNX1:RUNX2:RUNX3	KYTGTGGTTT	0.01	-5.252	0.0374	22	7.14%	1028.4	3.88%
M10183_3.00:EHF:ELF1:ELF2:ELF3:ELF4:ELF5:ETV6:ETV7	RAACVAGGAAGTRG	0.01	-5.25	0.0374	10	3.25%	321.8	1.22%
M10189_3.00:EHF:ELF1:ELF2:ELF3:ELF4:ELF5:ETV6:ETV7	RAACVAGGAAGTRG	0.01	-5.25	0.0374	10	3.25%	321.8	1.22%
M03287_3.00:CRX:DMBX1:DPRX:GSC:GSC2:OTX1:OTX2:PITX1:PITX2:PITX3:TPRX1	NTTAATCCH	0.01	-5.241	0.0377	84	27.27%	5554.9	20.98%
M05456_3.00:CRX:DMBX1:DPRX:GSC:GSC2:OTX1:OTX2:PITX1:PITX2:PITX3:TPRX1	CTAATCCC	0.01	-5.234	0.038	78	25.32%	5088.3	19.22%
M08413_3.00:ELF1:ELF2:ELF4:ELK1:ELK3:ELK4:ERF:ERG:ETS1:ETS2:ETV1:ETV2:ETV3:ETV3L:ETV4:ETV5:FEV:FLI1:GABPA	CGGVRCCGGAAGTGV	0.01	-5.231	0.038	4	1.30%	57.9	0.22%
M09127_3.00:ZNF606	GWGGAAACCGAGGMV	0.01	-5.231	0.038	4	1.30%	57.5	0.22%
M03294_3.00:RHOXF1	NTRATCCN	0.01	-5.224	0.0383	206	66.88%	15784.2	59.62%
M10806_3.00:NKX2-1:NKX2-2:NKX2-3:NKX2-4:NKX2-5:NKX2-6:NKX2-8	SCACTTGA	0.01	-5.218	0.0385	38	12.34%	2112.5	7.98%
M02932_3.00:TCF12:TCF3:TCF4	CAGGTGY	0.01	-5.217	0.0385	84	27.27%	5559.1	21.00%
M04047_3.00:CRX:DMBX1:DPRX:GSC:GSC2:OTX1:OTX2:PITX1:PITX2:PITX3:TPRX1	NTAATCCN	0.01	-5.215	0.0385	98	31.82%	6666.7	25.18%
M11342_3.00:KLF1:KLF12:KLF2:KLF3:KLF4:KLF5:KLF6:KLF7	VNRGGGRGGGGHSS	0.01	-5.195	0.0392	62	20.13%	3871.4	14.62%
M11745_3.00:GTF2I	RGAGGGAGG	0.01	-5.19	0.0394	70	22.73%	4480.1	16.92%
M11804_3.00:NKX2-1:NKX2-2:NKX2-3:NKX2-4:NKX2-5:NKX2-6:NKX2-8	AASYACTTAA	0.01	-5.188	0.0395	10	3.25%	324.6	1.23%
M03350_3.00:CRX:DMBX1:DPRX:GSC:GSC2:OTX1:OTX2:PITX1:PITX2:PITX3:TPRX1	VCTAATCCSY	0.01	-5.185	0.0396	34	11.04%	1838	6.94%
M05455_3.00:CRX:DMBX1:DPRX:GSC:GSC2:OTX1:OTX2:PITX1:PITX2:PITX3:TPRX1	HTAATCCN	0.01	-5.179	0.0397	78	25.32%	5099.8	19.26%
M02194_3.00:ALX1:ALX3:ALX4:ARX:BARHL1:BARHL2:BARX1:BARX2:BSX:DLX1:DLX2:DLX3:DLX4:DLX5:DLX6:DRGX:EMX1:EMX2:EN1:EN2:GBX1:GBX2:GSX1:GSX2:HMX1:HMX3:HOXA1:HOXA2:HOXA3:HOXB1:HOXB2:HOXB3:HOXD1:HOXD3:ISX:LHX1:LHX5:MEOX1:MEOX2:MNX1:MSX1:MSX2:NANOG:NANOGP8:NKX1-1:NKX1-2:PDX1:PHOX2A:PHOX2B:PROP1:SHOX:SHOX2:UNCX:VAX1:VAX2:VSX1:VSX2	GCTAATTANN	0.01	-5.176	0.0398	22	7.14%	1035.5	3.91%
M02232_3.00:ALX1:ALX3:ALX4:ARX:BARX1:BARX2:BSX:DLX2:DLX3:DRGX:EMX1:EMX2:EN1:EN2:ESX1:EVX1:EVX2:GBX1:GBX2:GSX1:GSX2:HOXA1:HOXA2:HOXA3:HOXA4:HOXA5:HOXB1:HOXB2:HOXB3:HOXB4:HOXB5:HOXC4:HOXC5:HOXD1:HOXD3:HOXD4:ISX:LHX2:LHX3:LHX4:LHX9:MEOX1:MIXL1:MNX1:MSX1:MSX2:NKX1-1:NKX1-2:NOTO:OTP:PDX1:PHOX2A:PHOX2B:PROP1:PRRX1:PRRX2:RAX:RAX2:SEBOX:SHOX:SHOX2:UNCX:VAX1:VAX2:VSX1:VSX2	YTAATTAN	0.01	-5.176	0.0398	22	7.14%	1035.5	3.91%
M09915_3.00:ATF1:CREB1:CREM	TGACGTCACYK	0.01	-5.174	0.0399	18	5.84%	784.8	2.96%
M12373_3.00:RFX5:RFX7	AACTGATG	0.01	-5.172	0.0399	16	5.19%	663.3	2.51%
M06235_3.00:ZFP14	ATGGAGSCHCYGGAAYG	0.01	-5.164	0.0402	6	1.95%	134.4	0.51%
M05356_3.00:NKX2-1:NKX2-2:NKX2-3:NKX2-4:NKX2-5:NKX2-6:NKX2-8	BTCAACGAS	0.01	-5.161	0.0403	12	3.90%	433.7	1.64%
M06690_3.00:ALX1:ALX3:ALX4:ARX:BARHL1:BARHL2:BARX1:BARX2:BSX:DRGX:EMX1:EMX2:EN1:EN2:ESX1:EVX1:EVX2:GBX1:GBX2:GSX1:GSX2:HESX1:HMX1:HMX2:HMX3:HOXA1:HOXA2:HOXA3:HOXA4:HOXA5:HOXB1:HOXB2:HOXB3:HOXB4:HOXB5:HOXC4:HOXC5:HOXD3:HOXD4:ISX:LHX2:LHX3:LHX4:LHX9:MEOX1:MEOX2:MIXL1:MNX1:MSX1:MSX2:NKX1-1:NKX1-2:NOTO:OTP:PDX1:PHOX2A:PHOX2B:PROP1:PRRX1:PRRX2:RAX:RAX2:SEBOX:SHOX:SHOX2:TLX1:TLX2:TLX3:UNCX:VAX1:VAX2:VE…	YTAATTA	0.01	-5.16	0.0403	146	47.40%	10614.4	40.09%
M05511_3.00:ALX1:ALX3:ALX4:ARX:BARX1:BARX2:BSX:DLX1:DLX2:DLX3:DLX4:DLX5:DLX6:DRGX:EN1:EN2:ESX1:GBX1:GBX2:GSX1:GSX2:HESX1:HOXA1:HOXA2:HOXA3:HOXA4:HOXA5:HOXB1:HOXB2:HOXB3:HOXB4:HOXB5:HOXC4:HOXC5:HOXD3:HOXD4:ISX:LBX2:LHX1:LHX2:LHX3:LHX4:LHX5:LHX6:LHX8:LHX9:LMX1A:LMX1B:MEOX1:MIXL1:MNX1:MSX1:MSX2:NKX1-1:NKX1-2:NOBOX:NOTO:OTP:PDX1:PHOX2A:PHOX2B:PROP1:PRRX1:PRRX2:RAX:RAX2:SEBOX:SHOX:SHOX2:UNCX:VAX1:VAX2…	YTAATTAG	0.01	-5.153	0.0405	26	8.44%	1298	4.90%
M12381_3.00:RUNX1:RUNX2:RUNX3	ACCACA	0.01	-5.149	0.0407	110	35.71%	7646.8	28.88%
M01078_3.00:CEBPG	NTTRCGCAATN	0.01	-5.149	0.0407	14	4.55%	547.8	2.07%
M11406_3.00:ZBTB18	CCAGCTGTGGGG	0.01	-5.144	0.0408	12	3.90%	434.3	1.64%
M05227_3.00:CRX:DMBX1:DPRX:GSC:GSC2:OTX1:OTX2:PITX1:PITX2:PITX3:TPRX1	CTAATCCB	0.01	-5.14	0.0409	78	25.32%	5107.5	19.29%
M02490_3.00:HNF4A:HNF4G:NR2E1	TGAGGTCAATNN	0.01	-5.134	0.0411	62	20.13%	3882.1	14.66%
M06403_3.00:ARNT:ARNT2	GTCACGTGM	0.01	-5.13	0.0413	6	1.95%	135.2	0.51%
M01809_3.00:HES7	GGCACGCGYC	0.01	-5.123	0.0415	22	7.14%	1040.2	3.93%
M11585_3.00:EBF1	ATTCCCYTGGGRN	0.01	-5.119	0.0416	20	6.49%	913.1	3.45%
M00311_3.00:FOXC1:FOXC2:FOXD1:FOXD2:FOXD3:FOXD4:FOXD4L1:FOXD4L3:FOXD4L4:FOXD4L5:FOXD4L6:FOXE1:FOXF1:FOXF2:FOXG1:FOXI1:FOXI3:FOXK2:FOXL1:FOXL2:FOXP4:FOXS1	NATGTRATTWDNN	0.01	-5.113	0.0419	58	18.83%	3585.5	13.54%
M05086_3.00:GCM1:GCM2	TACCCGCAT	0.01	-5.109	0.042	36	11.69%	1986.9	7.50%
M00801_3.00:PHF21A	ATTAWTATAT	0.01	-5.095	0.0426	76	24.68%	4961.8	18.74%
M00520_3.00:ALX1:ALX3:ALX4:ARX:BARHL1:BARHL2:DRGX:ESX1:GBX1:GBX2:HESX1:HMX1:HMX2:HMX3:ISX:LBX1:LBX2:MEOX1:MEOX2:MIXL1:MSX1:MSX2:PHOX2A:PHOX2B:PROP1:PRRX1:PRRX2:RAX:RAX2:SHOX:SHOX2:TLX2:UNCX:VENTX:VSX1:VSX2	NTAATKRG	0.01	-5.093	0.0426	154	50.00%	11306.6	42.71%
M05304_3.00:BARX1:BARX2:BSX:DLX1:DLX2:DLX3:DLX4:DLX5:DLX6:EN1:EN2:EVX1:EVX2:GBX1:GBX2:GSX1:GSX2:HOXA1:HOXA2:HOXA3:HOXA4:HOXA5:HOXB1:HOXB2:HOXB3:HOXB4:HOXB5:HOXC4:HOXC5:HOXD1:HOXD3:HOXD4:MEOX1:MEOX2:MNX1:MSX1:MSX2:NANOG:NANOGP8:NKX1-1:NKX1-2:PDX1:VAX1:VAX2:VENTX	NTAAYGAY	0.01	-5.09	0.0427	118	38.31%	8311	31.39%
M05144_3.00:SIX1:SIX2:SIX4:SIX5	CCGTATCRTN	0.01	-5.087	0.0428	18	5.84%	791.8	2.99%
M06025_3.00:TBX1:TBX10	KDAGGTGTGAAR	0.01	-5.087	0.0428	10	3.25%	329.4	1.24%
M09395_3.00:ZNF234	GCDGGGGMGGGAGGGAGRGG	0.01	-5.081	0.043	8	2.60%	228.8	0.86%
M05376_3.00:ALX1:ALX3:ALX4:ARX:DRGX:EMX1:EMX2:EN1:EN2:ESX1:GBX1:GBX2:HESX1:ISX:LHX1:LHX2:LHX3:LHX4:LHX5:LHX6:LHX8:LHX9:LMX1A:LMX1B:MIXL1:MSX1:MSX2:NOBOX:NOTO:OTP:PHOX2A:PHOX2B:PROP1:PRRX1:PRRX2:RAX:RAX2:SEBOX:SHOX:SHOX2:UNCX:VAX1:VAX2:VSX1:VSX2:ZFHX2	HTAACGAG	0.01	-5.073	0.0433	14	4.55%	552.7	2.09%
M11103_3.00:ATF3:JDP2	BATTRCGTCAKC	0.01	-5.072	0.0433	36	11.69%	1991.4	7.52%
M02270_3.00:HESX1	VYYAATTAR	0.01	-5.064	0.0436	44	14.29%	2562.5	9.68%
M05179_3.00:HOXA10:HOXA4:HOXA5:HOXA6:HOXA7:HOXA9:HOXB4:HOXB5:HOXB6:HOXB7:HOXB8:HOXB9:HOXC10:HOXC4:HOXC5:HOXC6:HOXC8:HOXC9:HOXD10:HOXD4:HOXD8:HOXD9:MNX1:PDX1	NHTAATTACN	0.01	-5.064	0.0436	46	14.94%	2707.2	10.23%
M11273_3.00:KLF1:KLF12:KLF2:KLF3:KLF4:KLF5:KLF6:KLF7:KLF8	GCAGGGGGYGGGGCSG	0.01	-5.059	0.0438	14	4.55%	553.9	2.09%
M10388_3.00:ESR1:ESR2:NR1D1:NR1D2:NR1H2:NR1H3:NR1H4:NR2C1:NR2C2:NR2F1:NR2F2:NR2F6:NR4A1:NR4A2:NR4A3:NR5A1:NR5A2:NR6A1:PPARA:PPARD:PPARG:RARA:RARB:RARG:RORA:RORB:RORC:RXRA:RXRB:RXRG:THRA:THRB	AWSTRGGTCARRG	0.01	-5.039	0.0446	32	10.39%	1717.6	6.49%
M10450_3.00:ESR1:ESR2:NR1D1:NR1D2:NR1H2:NR1H3:NR1H4:NR2C1:NR2C2:NR2F1:NR2F2:NR2F6:NR4A1:NR4A2:NR4A3:NR5A1:NR5A2:NR6A1:PPARA:PPARD:PPARG:RARA:RARB:RARG:RORA:RORB:RORC:RXRA:RXRB:RXRG:THRA:THRB	AWSTRGGTCARRG	0.01	-5.039	0.0446	32	10.39%	1717.6	6.49%
M10582_3.00:ARNT:ARNT2	GCACGTAY	0.01	-5.035	0.0447	40	12.99%	2279.1	8.61%
M02976_3.00:MLXIPL	ATCACGTGAT	0.01	-5.03	0.0449	6	1.95%	138.7	0.52%
M10174_3.00:ELF1:ELF2:ELF4:ELK1:ELK3:ELK4:ERF:ERG:ETS1:ETS2:ETV1:ETV2:ETV3:ETV3L:ETV4:ETV5:FEV:FLI1:GABPA	ACCGGAAGTGV	0.01	-5.03	0.0449	6	1.95%	138.2	0.52%
M02485_3.00:NR1I2:NR1I3:THRA:THRB:VDR	RGKTCAH	0.01	-5.024	0.0451	198	64.29%	15128.2	57.14%
M00359_3.00:BARX1:BARX2:BSX:EMX1:EMX2:EN1:EN2:EVX1:EVX2:GBX1:GBX2:GSX1:GSX2:HMX1:HMX2:HMX3:HOXA1:HOXA2:HOXA3:HOXA4:HOXA5:HOXB1:HOXB2:HOXB3:HOXB4:HOXB5:HOXC4:HOXC5:HOXD1:HOXD3:HOXD4:LBX2:MEOX1:MEOX2:MNX1:NANOG:NANOGP8:NKX1-1:NKX1-2:PDX1:TLX2:VENTX	AATATATAY	0.01	-5.014	0.0455	28	9.09%	1447.3	5.47%
M11321_3.00:EGR1:EGR2:EGR3:EGR4	HGTGGGHGGG	0.01	-5.012	0.0456	56	18.18%	3453.8	13.05%
M12524_3.00:TEAD3:TEAD4	ATATTTTT	0.01	-5.011	0.0456	114	37.01%	8004.7	30.23%
M05853_3.00:ESR1:ESR2:NR1D1:NR1D2:NR1H2:NR1H3:NR1H4:NR2C1:NR2C2:NR2F1:NR2F2:NR2F6:NR4A1:NR4A2:NR4A3:NR5A2:NR6A1:PPARA:PPARD:PPARG:RARA:RARB:RARG:RORA:RORB:RORC:RXRA:RXRB:RXRG	AAGGTCAAAAGGTCAH	0.01	-5.006	0.0458	4	1.30%	61.9	0.23%
M05874_3.00:ESR1:ESR2:NR1D1:NR1D2:NR1H2:NR1H3:NR1H4:NR2C1:NR2C2:NR2F1:NR2F2:NR2F6:NR4A1:NR6A1:PPARA:PPARD:PPARG:RARA:RARB:RARG:RORA:RORB:RORC:RXRA:RXRB:RXRG:THRA	RRGGTCAN	0.01	-5.004	0.0458	176	57.14%	13212.1	49.90%
M00291_3.00:GFI1:GFI1B	NNNWGATTK	0.01	-5	0.046	196	63.64%	14958.7	56.50%
M03288_3.00:CRX:DMBX1:DPRX:GSC:GSC2:OTX1:OTX2:PITX1:PITX2:PITX3:TPRX1	TTAATCCC	0.01	-5	0.046	84	27.27%	5605.1	21.17%
M02940_3.00:FOXC2:FOXD1:FOXD2:FOXD3:FOXG1:FOXI1:FOXI2:FOXI3:FOXJ2:FOXJ3:FOXK1:FOXK2:FOXP1:FOXP3	TGTTTATTGTTT	0.01	-4.997	0.046	6	1.95%	139.5	0.53%
M10804_3.00:CRX:DMBX1:DPRX:GSC:GSC2:OTX1:OTX2:PITX1:PITX2:PITX3:TPRX1	YTAATCCS	0.01	-4.992	0.0462	74	24.03%	4827	18.23%
M00402_3.00:PAX4	YNWATTA	0.01	-4.991	0.0462	214	69.48%	16561.2	62.55%
M09174_3.00:ZFP3	GGGGADGCAGGGVMWGGDGG	0.01	-4.99	0.0462	24	7.79%	1183.9	4.47%
M00417_3.00:POU6F2	VCTAATTAAN	0.01	-4.986	0.0464	22	7.14%	1053.1	3.98%
M10628_3.00:MAZ	GGGGGGGG	0.01	-4.986	0.0464	60	19.48%	3758.1	14.19%
M09170_3.00:ZNF648	GGBCAGCGGN	0.01	-4.981	0.0465	108	35.06%	7524.4	28.42%
M02061_3.00:FOXM1	TTGTTTTT	0.01	-4.976	0.0467	164	53.25%	12188.3	46.04%
M03319_3.00:CDX1:CDX2:CDX4	TTTTATKRC	0.01	-4.975	0.0468	50	16.23%	3014.6	11.39%
M06653_3.00:ALX1:ALX3:ALX4:ARX:BARX1:BARX2:BSX:DLX1:DLX2:DLX3:DLX4:DLX5:DLX6:DRGX:EMX1:EMX2:EN1:EN2:ESX1:EVX1:EVX2:GBX1:GBX2:GSX1:GSX2:HESX1:HMX1:HMX3:HOXA1:HOXA2:HOXA3:HOXA4:HOXA5:HOXB1:HOXB2:HOXB3:HOXB4:HOXB5:HOXC4:HOXC5:HOXD1:HOXD3:HOXD4:ISX:LBX1:LBX2:LHX2:LHX3:LHX4:LHX6:LHX8:LHX9:LMX1A:LMX1B:MEOX1:MIXL1:MNX1:MSX1:MSX2:NKX1-1:NKX1-2:NOBOX:NOTO:OTP:PDX1:PHOX2A:PHOX2B:PROP1:PRRX1:PRRX2:RAX:RAX2:…	NTTAATTRR	0.01	-4.966	0.0471	56	18.18%	3461.3	13.07%
M11422_3.00:SP1:SP3:SP4:SP5:SP8:SP9	GGGGCGGGGC	0.01	-4.965	0.0471	34	11.04%	1865.9	7.05%
M03975_3.00:HOXA10:HOXA5:HOXA6:HOXA7:HOXA9:HOXB4:HOXB5:HOXB6:HOXB7:HOXB8:HOXB9:HOXC10:HOXC5:HOXC6:HOXC8:HOXC9:HOXD10:HOXD8:HOXD9	NTTAATTACC	0.01	-4.965	0.0471	22	7.14%	1055.7	3.99%
M12310_3.00:ESR1:ESR2:NR1D1:NR1D2:NR1H2:NR1H3:NR1H4:NR2C1:NR2C2:NR2F1:NR2F2:NR2F6:NR4A1:NR4A2:NR4A3:NR5A1:NR5A2:NR6A1:PPARA:PPARD:PPARG:RARA:RARB:RARG:RORA:RORB:RORC:RXRA:RXRB:RXRG:THRA:THRB	TRGGTCA	0.01	-4.961	0.0473	24	7.79%	1186	4.48%
M11656_3.00:FOXM1	AAATAAACA	0.01	-4.959	0.0473	92	29.87%	6246.3	23.59%
M00528_3.00:HOXA13:HOXB13:HOXC13:HOXD13	WTTTAYDRG	0.01	-4.956	0.0474	108	35.06%	7530.6	28.44%
M00881_3.00:ESR1:ESR2:NR1D1:NR1D2:NR1H2:NR1H3:NR1H4:NR2C1:NR2C2:NR2F1:NR2F2:NR2F6:NR4A1:NR4A2:NR4A3:NR5A2:NR6A1:PPARA:PPARD:PPARG:RARA:RARB:RARG:RORA:RORB:RORC:RXRA:RXRB:RXRG	NDAGGTCANN	0.01	-4.956	0.0474	158	51.30%	11682.3	44.13%
M11968_3.00:POU3F2	TTATGYTAAT	0.01	-4.952	0.0475	4	1.30%	62.2	0.24%
M09500_3.00:ZSCAN30	SKGVDGGCYGCWGGC	0.01	-4.941	0.048	14	4.55%	561.3	2.12%
M00334_3.00:ALX1:ALX3:ALX4:ARX:BSX:DLX1:DLX2:DLX3:DLX6:DRGX:EMX1:EMX2:EN1:EN2:ESX1:GBX1:GBX2:HESX1:HOXA2:HOXB2:ISX:LBX1:LBX2:LHX1:LHX2:LHX3:LHX4:LHX5:LHX6:LHX8:LHX9:LMX1A:LMX1B:MEOX1:MIXL1:MNX1:MSX1:MSX2:NKX1-1:NKX1-2:NOBOX:NOTO:OTP:PHOX2A:PHOX2B:PROP1:PRRX1:PRRX2:RAX:RAX2:SEBOX:SHOX:SHOX2:UNCX:VAX1:VAX2:VSX1:VSX2:ZFHX2:ZFHX3	NAGTAATTATN	0.01	-4.934	0.0483	22	7.14%	1058	4.00%
M04889_3.00:DMRT1:DMRT2:DMRT3:DMRTA2:DMRTC2	GAAYGATACA	0.01	-4.932	0.0483	6	1.95%	141.7	0.54%
M11627_3.00:ELF1:ELF2:ELF4:ELK1:ELK3:ELK4:ERF:ERG:ETS1:ETS2:ETV1:ETV2:ETV3:ETV3L:ETV4:ETV5:FEV:FLI1:GABPA	CCGGAAGTG	0.01	-4.932	0.0483	6	1.95%	141.6	0.53%
M12443_3.00:LEF1:TCF7:TCF7L1:TCF7L2	WRMAWAACAAAGG	0.01	-4.923	0.0488	74	24.03%	4841	18.29%
M00293_3.00:GFI1:GFI1B	NNNWGATTD	0.01	-4.92	0.0488	206	66.88%	15865.9	59.93%
M03246_3.00:FOXC1:FOXC2:FOXD1:FOXD2:FOXD3:FOXD4:FOXD4L1:FOXD4L3:FOXD4L4:FOXD4L5:FOXD4L6:FOXE1:FOXE3:FOXF1:FOXF2:FOXG1:FOXI1:FOXI3:FOXJ3:FOXL1:FOXL2:FOXS1	ARWWAATATTTAYW	0.01	-4.918	0.0489	16	5.19%	682.4	2.58%
M11218_3.00:ZEB1:ZEB2	NSHCACCTGBSC	0.01	-4.913	0.0491	54	17.53%	3321.5	12.55%
M00903_3.00:TBX1:TBX10	AGGTGTGAANN	0.01	-4.912	0.0491	30	9.74%	1595.9	6.03%
M06779_3.00:ALX1:ALX3:ALX4:ARX:BARX1:BARX2:BSX:DLX1:DLX2:DLX3:DLX4:DLX5:DLX6:DRGX:EN1:EN2:ESX1:GBX1:GBX2:HESX1:HOXA2:HOXB2:ISX:LBX1:LBX2:LHX1:LHX2:LHX3:LHX4:LHX5:LHX6:LHX8:LHX9:LMX1A:LMX1B:MEOX1:MIXL1:MNX1:MSX1:MSX2:NKX1-1:NKX1-2:NOBOX:NOTO:OTP:PDX1:PHOX2A:PHOX2B:PROP1:PRRX1:PRRX2:RAX:RAX2:SEBOX:SHOX:SHOX2:UNCX:VAX1:VAX2:VSX1:VSX2:ZFHX2:ZFHX3	DCYAATTAAN	0.01	-4.902	0.0496	32	10.39%	1734.1	6.55%
M12232_3.00:HNF4A:HNF4G:NR2E1:NR2F1:NR2F2:NR2F6:NR6A1:RXRB:RXRG	GKKCAAAGTTCAB	0.01	-4.9	0.0496	6	1.95%	142.1	0.54%
M03364_3.00:ARX:BARHL1:BARHL2:BARX1:BARX2:BSX:DLX1:DLX2:DLX3:DLX4:DLX5:DLX6:EMX1:EMX2:ESX1:EVX1:EVX2:GBX1:GBX2:HMX1:HMX2:HMX3:HOXA2:HOXB2:LBX1:LBX2:MEOX1:MEOX2:MNX1:MSX1:MSX2:NANOG:NANOGP8:NKX1-1:NKX1-2:PDX1:RAX:RAX2:TLX1:TLX2:TLX3:UNCX:VAX1:VAX2	VHTAAACGRT	0.01	-4.896	0.0498	40	12.99%	2299.5	8.69%
M08502_3.00:ZSCAN21	DGTGCTNAGTRCTT	0.01	-4.891	0.05	10	3.25%	339.5	1.28%
M05073_3.00:GATA1:GATA2:GATA3:GATA4:GATA5:GATA6	NWGATAASRN	0.01	-4.891	0.05	38	12.34%	2157.1	8.15%
M05408_3.00:ISL1:ISL2:NOTO:SHOX:SHOX2:VSX1	GCACTTAV	0.01	-4.889	0.05	100	32.47%	6901.8	26.07%
M04986_3.00:ELF1:ELF2:ELF4:ELK1:ELK3:ELK4:ERF:ERG:ETS1:ETS2:ETV1:ETV2:ETV3:ETV3L:ETV4:ETV5:FEV:FLI1:GABPA	NACCGGAAGYN	0.01	-4.878	0.0505	36	11.69%	2018	7.62%
M09408_3.00:ZNF200	SVVRCCGGAAGY	0.01	-4.876	0.0506	12	3.90%	450.2	1.70%
M00579_3.00:BARHL1:BARHL2:BSX:DLX2:EMX1:EMX2:EN1:EN2:GBX1:GBX2:GSX1:GSX2:HMX1:HMX2:HMX3:HOXA3:HOXA4:HOXA5:HOXB3:HOXB4:HOXB5:HOXC4:HOXC5:HOXD3:HOXD4:LBX2:MEOX1:MEOX2:MNX1:MSX1:MSX2:NANOG:NANOGP8:NKX1-1:NKX1-2:PDX1:TLX1:TLX2:TLX3:VAX1:VAX2:VENTX	TTAATTGNBN	0.01	-4.876	0.0506	76	24.68%	5006.1	18.91%
M06189_3.00:MYPOP	NTTWGCGCNNNN	0.01	-4.875	0.0506	26	8.44%	1328.4	5.02%
M11634_3.00:ELF1:ELF2:ELF4:ELK1:ELK3:ELK4:ERF:ERG:ETS1:ETS2:ETV1:ETV2:ETV3:ETV3L:ETV4:ETV5:FEV:FLI1:GABPA	VAMAGGAAGTK	0.01	-4.87	0.0508	56	18.18%	3478.1	13.14%
M04790_3.00:ZBTB18	DDTCCAGATGTKB	0.01	-4.869	0.0508	14	4.55%	566.2	2.14%
M09425_3.00:MAZ	GGGAGGGGG	0.01	-4.869	0.0508	40	12.99%	2303.4	8.70%
M08547_3.00:ZNF366	AWGGATGGAWGGATG	0.01	-4.853	0.0515	10	3.25%	341.6	1.29%
M00323_3.00:ALX1:ALX3:ALX4:ARX:BARX1:BARX2:BSX:DLX2:DLX3:DRGX:EN1:EN2:ESX1:GBX1:GBX2:HESX1:HOXA2:HOXB2:ISX:LBX1:LBX2:LHX1:LHX2:LHX3:LHX4:LHX5:LHX6:LHX8:LHX9:LMX1A:LMX1B:MEOX1:MIXL1:MNX1:MSX1:MSX2:NKX1-1:NKX1-2:NOBOX:NOTO:OTP:PDX1:PHOX2A:PHOX2B:PROP1:PRRX1:PRRX2:RAX:RAX2:SEBOX:SHOX:SHOX2:UNCX:VAX1:VAX2:VSX1:VSX2:ZFHX2:ZFHX3	NNTAATTRV	0.01	-4.852	0.0515	162	52.60%	12051.3	45.52%
M05359_3.00:ALX1:ALX3:ALX4:ARX:DRGX:EN1:EN2:ESX1:HESX1:ISX:LHX2:LHX3:LHX4:LHX6:LHX8:LHX9:LMX1A:LMX1B:MIXL1:NOBOX:OTP:PHOX2A:PHOX2B:PROP1:PRRX1:PRRX2:RAX:RAX2:SEBOX:SHOX:SHOX2:UNCX:VSX1:VSX2:ZFHX2	TTAACGAG	0.01	-4.831	0.0526	20	6.49%	939.2	3.55%
M05080_3.00:GATA1:GATA2:GATA3:GATA4:GATA5:GATA6	NWGATAASRN	0.01	-4.83	0.0526	50	16.23%	3038.1	11.48%
M11834_3.00:NKX6-1:NKX6-2:NKX6-3	NNTAWTTAHTWY	0.01	-4.826	0.0528	62	20.13%	3939.6	14.88%
M03059_3.00:MAF:MAFA:MAFB:MAFG:MAFK	GTCAGCAHWWTT	0.01	-4.824	0.0529	18	5.84%	814	3.07%
M05587_3.00:CRX:DMBX1:DPRX:GSC:GSC2:OTX1:OTX2:PITX1:PITX2:PITX3:TPRX1	STAATCCS	0.01	-4.813	0.0534	106	34.42%	7403.6	27.96%
M08171_3.00:ZNF789	TGGTGTCAGRAG	0.01	-4.812	0.0534	14	4.55%	570.5	2.15%
M10417_3.00:HNF4G:NR1H4:NR2C1:NR2C2:NR2F1:NR2F2:NR2F6:NR4A1:NR4A2:NR4A3:NR5A1:NR5A2:NR6A1:PPARA:PPARD:PPARG:RARA:RARB:RARG:RORA:RORB:RORC:RXRA:RXRB:RXRG:THRA:THRB	GRGDVAGDVAGAGGTCAGRG	0.01	-4.795	0.0543	8	2.60%	240.6	0.91%
M11466_3.00:SALL1	NCTTTTGGAYH	0.01	-4.791	0.0545	36	11.69%	2029.5	7.67%
M06782_3.00:BARHL1:BARHL2:BSX:DLX2:EMX1:EMX2:EN1:EN2:GBX1:GBX2:GSX1:GSX2:HMX1:HMX2:HMX3:HOXA3:HOXA4:HOXA5:HOXB3:HOXB4:HOXB5:HOXC4:HOXC5:HOXD3:HOXD4:LBX2:MEOX1:MEOX2:MNX1:MSX1:MSX2:NANOG:NANOGP8:NKX1-1:NKX1-2:PDX1:TLX1:TLX2:TLX3:VAX1:VAX2:VENTX	TTAATTG	0.01	-4.772	0.0555	28	9.09%	1475.5	5.57%
M04984_3.00:ELF1:ELF2:ELF4:ELK1:ELK3:ELK4:ERF:ERG:ETS1:ETS2:ETV1:ETV2:ETV3:ETV3L:ETV4:ETV5:FEV:FLI1:GABPA	NRCCGGAAGYV	0.01	-4.77	0.0555	14	4.55%	573.1	2.16%
M11744_3.00:GTF2I	VAGGAAGTGA	0.01	-4.763	0.0558	60	19.48%	3799.2	14.35%
M08116_3.00:ZNF33A	GTGSCT	0.01	-4.76	0.056	220	71.43%	17163.3	64.83%
M10599_3.00:MYCN	VRCCACGTGG	0.01	-4.76	0.056	10	3.25%	346.7	1.31%
M00470_3.00:CRX:DMBX1:DPRX:GSC:GSC2:OTX1:OTX2:PITX1:PITX2:PITX3:TPRX1	HTAATCCBN	0.01	-4.759	0.056	102	33.12%	7093	26.79%
M01743_3.00:ARID5A:ARID5B	NAATAYNN	0.01	-4.754	0.0562	210	68.18%	16267.6	61.44%
M00488_3.00:ARX:BARHL1:BARHL2:BARX1:BARX2:BSX:DLX1:DLX2:DLX3:DLX4:DLX5:DLX6:EMX1:EMX2:ESX1:EVX1:EVX2:GBX1:GBX2:HMX1:HMX2:HMX3:HOXA2:HOXB2:LBX1:LBX2:MEOX1:MEOX2:MNX1:MSX1:MSX2:NANOG:NANOGP8:NKX1-1:NKX1-2:PDX1:RAX:RAX2:TLX1:TLX2:TLX3:UNCX:VAX1:VAX2	NTAAWYGNY	0.01	-4.749	0.0564	132	42.86%	9552.4	36.08%
M00312_3.00:FOXC1:FOXC2:FOXD1:FOXD2:FOXD3:FOXD4:FOXD4L1:FOXD4L3:FOXD4L4:FOXD4L5:FOXD4L6:FOXE1:FOXF1:FOXF2:FOXG1:FOXI1:FOXI3:FOXK2:FOXL1:FOXL2:FOXP4:FOXS1	TGTTTWYNYW	0.01	-4.748	0.0565	186	60.39%	14151.8	53.45%
M03125_3.00:SP1:SP3:SP4:SP5:SP8:SP9	GKGGGCGKGGY	0.01	-4.747	0.0565	46	14.94%	2757.4	10.41%
M03387_3.00:ALX1:ALX3:ALX4:ARX:BARX1:BARX2:BSX:DLX1:DLX2:DLX3:DLX4:DLX5:DLX6:DRGX:EMX1:EMX2:EN1:EN2:ESX1:EVX1:EVX2:GBX1:GBX2:GSX1:GSX2:HESX1:HMX1:HMX3:HOXA1:HOXA2:HOXA3:HOXA4:HOXA5:HOXB1:HOXB2:HOXB3:HOXB4:HOXB5:HOXC4:HOXC5:HOXD1:HOXD3:HOXD4:ISX:LHX2:LHX3:LHX4:LHX6:LHX8:LHX9:LMX1A:LMX1B:MEOX1:MIXL1:MNX1:MSX1:MSX2:NKX1-1:NKX1-2:NOBOX:NOTO:OTP:PDX1:PHOX2A:PHOX2B:PROP1:PRRX1:PRRX2:RAX:RAX2:SEBOX:SHOX…	TAATTRNSYAATTA	0.01	-4.745	0.0566	6	1.95%	147.2	0.56%
M10655_3.00:ELF1:ELF2:ELF4:ELK1:ELK3:ELK4:ERF:ERG:ETS1:ETS2:ETV1:ETV2:ETV3:ETV3L:ETV4:ETV5:FEV:FLI1:GABPA	ACAGGAAGTG	0.01	-4.742	0.0567	14	4.55%	575.9	2.18%
M06609_3.00:ALX1:ALX3:ALX4:ARX:BARX1:BARX2:BSX:DLX1:DLX2:DLX3:DLX4:DLX5:DLX6:DRGX:EMX1:EMX2:EN1:EN2:ESX1:EVX1:EVX2:GBX1:GBX2:GSX1:GSX2:HESX1:HOXA2:HOXA3:HOXB2:HOXB3:HOXD3:ISX:LBX1:LBX2:LHX1:LHX2:LHX3:LHX4:LHX5:LHX6:LHX8:LHX9:LMX1A:LMX1B:MEOX1:MIXL1:MNX1:MSX1:MSX2:NKX1-1:NKX1-2:NOBOX:NOTO:OTP:PDX1:PHOX2A:PHOX2B:PROP1:PRRX1:PRRX2:RAX:RAX2:SEBOX:SHOX:SHOX2:UNCX:VAX1:VAX2:VSX1:VSX2:ZFHX2:ZFHX3	YNYTAATTA	0.01	-4.73	0.0573	32	10.39%	1757	6.64%
M03402_3.00:CRX:DMBX1:DPRX:GSC:GSC2:OTX1:OTX2:PITX1:PITX2:PITX3:TPRX1	TTAATCCB	0.01	-4.726	0.0575	84	27.27%	5665.4	21.40%
M11670_3.00:FOXJ1:FOXJ2	TAAACAAACAMWT	0.01	-4.723	0.0576	10	3.25%	348.7	1.32%
M00371_3.00:ALX1:ALX3:ALX4:ARX:BARX1:BARX2:BSX:DLX2:DLX3:DRGX:EMX1:EMX2:EN1:EN2:ESX1:EVX1:EVX2:GBX1:GBX2:GSX1:GSX2:HESX1:HOXA2:HOXA3:HOXB2:HOXB3:HOXD3:ISX:LBX1:LBX2:LHX1:LHX2:LHX3:LHX4:LHX5:LHX6:LHX8:LHX9:LMX1A:LMX1B:MEOX1:MIXL1:MNX1:MSX1:MSX2:NKX1-1:NKX1-2:NOBOX:NOTO:OTP:PDX1:PHOX2A:PHOX2B:PROP1:PRRX1:PRRX2:RAX:RAX2:SEBOX:SHOX:SHOX2:UNCX:VAX1:VAX2:VSX1:VSX2:ZFHX2:ZFHX3	CTAATTAA	0.01	-4.716	0.058	34	11.04%	1898.2	7.17%
M05149_3.00:CRX:DLX1:DLX2:DLX4:DLX5:EMX1:LHX2:LHX9:PITX1:PITX2:VAX1:VSX1	CTAATTAN	0.01	-4.715	0.058	32	10.39%	1759	6.64%
M03998_3.00:ALX1:ALX3:ALX4:ARX:BARHL1:BARHL2:BARX1:BARX2:BSX:DLX1:DLX2:DLX3:DLX4:DLX5:DLX6:DRGX:EMX1:EMX2:EN1:EN2:ESX1:EVX1:EVX2:GBX1:GBX2:GSX1:GSX2:HESX1:HOXA1:HOXA2:HOXA3:HOXA4:HOXA5:HOXB1:HOXB2:HOXB3:HOXB4:HOXB5:HOXC4:HOXC5:HOXD1:HOXD3:HOXD4:ISX:LHX1:LHX3:LHX4:LHX5:MEOX1:MEOX2:MIXL1:MNX1:MSX1:MSX2:NANOG:NANOGP8:NKX1-1:NKX1-2:NOTO:OTP:PDX1:PHOX2A:PHOX2B:PROP1:PRRX1:PRRX2:RAX:RAX2:SEBOX:SHOX:SHO…	GCTAATTASS	0.01	-4.714	0.058	16	5.19%	698	2.64%
M03211_3.00:ELF1:ELF2:ELF4:ELK1:ELK3:ELK4:ERF:ERG:ETS1:ETS2:ETV1:ETV2:ETV3:ETV3L:ETV4:ETV5:FEV:FLI1:GABPA	ACCGGAAGTN	0.01	-4.714	0.058	14	4.55%	577.7	2.18%
M03488_3.00:HOXA10:HOXA11:HOXA5:HOXA6:HOXA7:HOXA9:HOXB5:HOXB6:HOXB8:HOXB9:HOXC10:HOXC11:HOXC5:HOXC6:HOXC8:HOXC9:HOXD10:HOXD11:HOXD8:HOXD9	TTTTACGAC	0.01	-4.709	0.0582	34	11.04%	1899.7	7.18%
M06679_3.00:CRX:DMBX1:DPRX:GSC:GSC2:OTX1:OTX2:PITX1:PITX2:PITX3:TPRX1	YTAATCCS	0.01	-4.701	0.0587	90	29.22%	6146.3	23.22%
M12416_3.00:SMAD1:SMAD3:SMAD5:SMAD9	GMGACGVN	0.01	-4.697	0.0588	156	50.65%	11583.5	43.75%
M08654_3.00:TWIST1:TWIST2	CCAGATGT	0.01	-4.697	0.0588	26	8.44%	1348.1	5.09%
M11865_3.00:NKX2-1:NKX2-2:NKX2-3:NKX2-4:NKX2-5:NKX2-6:NKX2-8	CACTTRA	0.01	-4.695	0.0589	66	21.43%	4270.7	16.13%
M05279_3.00:HOXA10:HOXA11:HOXA9:HOXB9:HOXC10:HOXC11:HOXC12:HOXC9:HOXD10:HOXD11:HOXD12:HOXD9	NTTTTACGACC	0.01	-4.686	0.0593	10	3.25%	350.5	1.32%
M08842_3.00:EHF:ELF1:ELF2:ELF3:ELF4:ELF5:ETV6:ETV7	CAGGAAGTG	0.01	-4.683	0.0595	22	7.14%	1083.8	4.09%
M06001_3.00:TBX15:TBX18:TBX20:TBX22	RRAGGTGTGAAR	0.01	-4.669	0.0602	12	3.90%	463.3	1.75%
M04061_3.00:ALX1:ALX3:ALX4:ARX:BARHL1:BARHL2:BARX1:BARX2:BSX:DLX2:DLX3:DRGX:EMX1:EMX2:EN1:EN2:ESX1:EVX1:EVX2:GBX1:GBX2:GSX1:GSX2:HESX1:HMX2:HOXA2:HOXA3:HOXA4:HOXA5:HOXB1:HOXB2:HOXB3:HOXB4:HOXB5:HOXC4:HOXD3:HOXD4:ISX:MEOX1:MEOX2:MIXL1:MNX1:MSX1:MSX2:NKX1-1:NKX1-2:OTP:PDX1:PHOX2A:PHOX2B:PROP1:PRRX1:PRRX2:RAX:RAX2:SHOX:SHOX2:TLX1:TLX2:TLX3:UNCX:VAX1:VAX2:VENTX:VSX1:VSX2	CTAATTGC	0.01	-4.659	0.0608	58	18.83%	3667.6	13.85%
M05361_3.00:ALX1:ALX3:ALX4:ARX:DRGX:EN1:EN2:ESX1:HESX1:ISX:LHX2:LHX3:LHX4:LHX6:LHX8:LHX9:LMX1A:LMX1B:MIXL1:NOBOX:OTP:PHOX2A:PHOX2B:PROP1:PRRX1:PRRX2:RAX:RAX2:SEBOX:SHOX:SHOX2:UNCX:VSX1:VSX2:ZFHX2	TTAACGAG	0.01	-4.655	0.061	6	1.95%	150	0.57%
M00602_3.00:POU4F3	THATTAAN	0.01	-4.654	0.061	178	57.79%	13483	50.93%
M11616_3.00:ELF1:ELF2:ELF4:ELK1:ELK3:ELK4:ERF:ERG:ETS1:ETS2:ETV1:ETV2:ETV3:ETV3L:ETV4:ETV5:FEV:FLI1:GABPA	ACCGGAAGYV	0.01	-4.646	0.0615	28	9.09%	1490.7	5.63%
M11111_3.00:FOS:FOSB:FOSL1:FOSL2	NTGAGTCASN	0.01	-4.645	0.0615	44	14.29%	2627.8	9.93%
M05268_3.00:ALX1:ALX3:ALX4:ARX:DRGX:EMX1:EMX2:EN1:EN2:ESX1:GBX1:GBX2:GSX1:GSX2:HESX1:HOXA2:HOXA3:HOXB2:HOXB3:HOXD3:ISX:LHX1:LHX2:LHX3:LHX4:LHX5:LHX6:LHX8:LHX9:LMX1A:LMX1B:MIXL1:MNX1:MSX1:MSX2:NOBOX:NOTO:OTP:PDX1:PHOX2A:PHOX2B:PROP1:PRRX1:PRRX2:RAX:RAX2:SEBOX:SHOX:SHOX2:UNCX:VAX1:VAX2:VSX1:VSX2:ZFHX2	BTAATTAV	0.01	-4.642	0.0616	60	19.48%	3822.4	14.44%
M03434_3.00:HOXA10:HOXA11:HOXA6:HOXA9:HOXB6:HOXB8:HOXB9:HOXC10:HOXC11:HOXC12:HOXC6:HOXC8:HOXC9:HOXD10:HOXD11:HOXD12:HOXD8:HOXD9	DTTTTAYGAC	0.01	-4.64	0.0617	20	6.49%	957.1	3.62%
M11924_3.00:ISL1:ISL2:NOTO:SHOX:SHOX2:VSX1	CACTTAA	0.01	-4.633	0.0621	72	23.38%	4747	17.93%
M02482_3.00:HNF4A:HNF4G:NR1H4:NR2C1:NR2C2:NR2F1:NR2F2:NR2F6:NR4A1:NR4A2:NR4A3:NR5A1:NR5A2:NR6A1:PPARA:PPARD:PPARG:RARA:RARB:RARG:RORA:RORB:RORC:RXRA:RXRB:RXRG:THRA:THRB	GGGGTCAH	0.01	-4.627	0.0623	90	29.22%	6163.4	23.28%
M02484_3.00:HNF4A:HNF4G:NR1H4:NR2C1:NR2C2:NR2F1:NR2F2:NR2F6:NR4A1:NR4A2:NR4A3:NR5A1:NR5A2:NR6A1:PPARA:PPARD:PPARG:RARA:RARB:RARG:RORA:RORB:RORC:RXRA:RXRB:RXRG:THRA	RRGGTCAH	0.01	-4.627	0.0623	90	29.22%	6163.4	23.28%
M08013_3.00:ZFP14	GGAGGCHCTGGAABG	0.01	-4.625	0.0624	6	1.95%	151.4	0.57%
M01761_3.00:ASH1L:HMGA1:HMGA2:SETBP1:SRCAP	AAAAATAT	0.01	-4.623	0.0625	118	38.31%	8429.9	31.84%
M00336_3.00:ALX1:ALX3:ALX4:ARX:BARX1:BARX2:BSX:DLX1:DLX2:DLX3:DLX6:DRGX:EMX1:EMX2:EN1:EN2:ESX1:EVX1:EVX2:GBX1:GBX2:GSX1:GSX2:HESX1:HOXA2:HOXA3:HOXB2:HOXB3:HOXD3:ISX:LBX1:LBX2:LHX1:LHX2:LHX3:LHX4:LHX5:LHX6:LHX8:LHX9:LMX1A:LMX1B:MEOX1:MIXL1:MNX1:MSX1:MSX2:NKX1-1:NKX1-2:NOBOX:NOTO:OTP:PDX1:PHOX2A:PHOX2B:PROP1:PRRX1:PRRX2:RAX:RAX2:SEBOX:SHOX:SHOX2:UNCX:VAX1:VAX2:VSX1:VSX2:ZFHX2:ZFHX3	NNNNNNNWAT	0.01	-4.616	0.0629	286	92.86%	23474.1	88.66%
M00338_3.00:ALX1:ALX3:ALX4:ARX:BARHL1:BARHL2:BARX1:BARX2:BSX:DLX1:DLX2:DLX3:DLX4:DLX5:DLX6:DRGX:EMX1:EMX2:EN1:EN2:ESX1:EVX1:EVX2:GBX1:GBX2:GSX1:GSX2:HMX1:HMX2:HMX3:HOXA1:HOXA2:HOXA3:HOXA4:HOXA5:HOXB1:HOXB2:HOXB3:HOXB4:HOXB5:HOXC4:HOXC5:HOXD1:HOXD3:HOXD4:ISX:LHX2:LHX3:LHX4:LHX9:MEOX1:MIXL1:MNX1:MSX1:MSX2:NKX1-1:NKX1-2:NOBOX:NOTO:OTP:PDX1:PHOX2A:PHOX2B:PROP1:PRRX1:PRRX2:RAX:RAX2:SEBOX:SHOX:SHOX2:TL…	NNTAATDRNN	0.01	-4.612	0.0631	160	51.95%	11947.7	45.13%
M11144_3.00:CEBPD	RTTRBGCAA	0.1	-4.6	0.0638	108	35.06%	7618.9	28.78%
M10981_3.00:TCF12:TCF3:TCF4	GCCAGCTG	0.1	-4.598	0.0639	20	6.49%	961.8	3.63%
M05995_3.00:SOX1:SOX10:SOX11:SOX12:SOX13:SOX14:SOX15:SOX17:SOX18:SOX2:SOX21:SOX3:SOX30:SOX4:SOX5:SOX6:SOX7:SOX8:SOX9:SRY	GCATTGTB	0.1	-4.593	0.0642	158	51.30%	11782.9	44.51%
M00192_3.00:ZIC1:ZIC2:ZIC3:ZIC4:ZIC5	CNCMGCRGGD	0.1	-4.591	0.0643	106	34.42%	7458.9	28.17%
M08611_3.00:FOXA1:FOXA2:FOXA3:FOXB1	TGTTTRCTTW	0.1	-4.581	0.0649	48	15.58%	2932.2	11.08%
M08601_3.00:NFXL1	STSCTCCC	0.1	-4.573	0.0653	56	18.18%	3532.4	13.34%
M03999_3.00:HOXA3:HOXA4:HOXA5:HOXA6:HOXA7:HOXB3:HOXB4:HOXB5:HOXB6:HOXB7:HOXB8:HOXC4:HOXC5:HOXC6:HOXC8:HOXD3:HOXD4:HOXD8:PDX1	TTAATTAC	0.1	-4.571	0.0654	32	10.39%	1777.9	6.72%
[truncated: 7,105 more rows]

## Sheet: HOMER_HF_enAllele
Motif Name	Consensus	P-value	Log P-value	q-value (Benjamini)	# of Target Sequences with Motif(of 247)	% of Target Sequences with Motif	# of Background Sequences with Motif(of 14571)	% of Background Sequences with Motif
[truncated: 8,440 more rows]

[truncated: 12 more sheets: CHD MPRA Library, MPRA counts, MPRA fold change, list of MPRA enAlleles, HE_enAlleles, HF_enAlleles, Heart_CRE_enAlleles, RELI_enAllele, RELI_HE_enAllele, RELI_HF_enAllele, RELI_heart_CRE_enAllele, HOMER_enAllele]
