# Supplementary material for: Global Evaluation of Congenital Heart Disease-Associated Non-Coding Variants
Source: bioRxiv preprint, doi:10.64898/2025.12.02.691900, version 2 (2025-12-10)
Supplement: Supplemental Data 4 [file 691900_file05.xlsx]

## Sheet: Readme
Sheet_name	Description
MPRA allelic fold change	allelic differential MPRA activity between reference and alternate alleles
MPRA_allelic_statistics	MPRA summary and statistical significance
enVars list	list of variants with differential allelic expression (>25% change from reference allele) with statistical significance (padj value < 0.05)
SNPmoods_enVars	motif creation and disruption proportion analysis of enVars relative to background (entire MPRA library)
SNPmoods_HE_enVars	motif creation and disruption proportion analysis of enVars in heart enhancers relative to background (entire MPRA library)
SNPmoods_HF_enVars	motif creation and disruption proportion analysis of enVars in heart footprints relative to background (entire MPRA library)
Overlap_vs_adjacent_TF	Variant overlaping to adjacent TF ratio reltaive to variant position. Overlaping TF have and odds ratio of >2.0

## Sheet: Overlap_vs_adjacent_TF
TF	Overlapping_Count	Adjacent_Count	Overlapping_Adjacent_Ratio
ZNF7	8	2	4
Ascl2	24	8	3
NF-E2	6	2	3
IRF8	6	2	3
PU.1:IRF8	6	2	3
HNF4a	6	2	3
Tcf21	10	4	2.5
Brn1	10	4	2.5
MafK	10	4	2.5
Bach2	10	4	2.5
MafF	4	2	2
Pax8	4	2	2
PRDM14	4	2	2
Slug	4	2	2
Bach1	4	2	2
IRF3	8	4	2
Myf5	4	2	2
2025-10-06	18	10	1.8
Nr5a2	10	6	1.66667
MyoD	6	4	1.5
Atf1	18	12	1.5
HNF1b	6	4	1.5
Jun-AP1	12	8	1.5
Tbet	12	8	1.5
Fosl2	12	8	1.5
JunB	14	10	1.4
Foxh1	8	6	1.33333
PRDM1	8	6	1.33333
BHLHA15	16	12	1.33333
MafB	8	6	1.33333
RUNX	8	6	1.33333
GRHL2	12	10	1.2
RUNX2	12	10	1.2
Ap4	14	12	1.16667
Znf263	18	16	1.125
Rfx1	2	2	1
EBF1	8	8	1
ZEB2	10	10	1
E2F3	4	4	1
Nrf2	2	2	1
bHLHE40	4	4	1
OCT4-SOX2-TCF-NANOG	2	2	1
GLIS3	20	20	1
Foxa3	2	2	1
ETS:RUNX	2	2	1
Fos	14	14	1
Oct4:Sox17	2	2	1
Fra2	12	12	1
ZBTB18	4	4	1
Ets1-distal	4	4	1
ZNF322	2	2	1
Atf2	2	2	1
Snail1	8	8	1
Chop	8	8	1
NFE2L2	2	2	1
USF1	4	4	1
ZNF652/HepG2-ZNF652.Flag-ChIP-Seq	6	6	1
BATF	14	14	1
MyoG	4	4	1
Atf4	12	12	1
Hnf1	6	6	1
CRE	4	4	1
HIF2a	2	2	1
ZNF415	4	4	1
HLF	24	26	0.923077
NeuroG2	18	20	0.9
NFIL3	30	34	0.882353
KLF6	12	14	0.857143
ETV4	12	14	0.857143
Foxa2	10	12	0.833333
Hoxc9	10	12	0.833333
RARa	40	50	0.8
Pit1+1bp	24	30	0.8
ZNF467	8	10	0.8
FOXM1	22	28	0.785714
Dlx3	36	46	0.782609
Fra1	14	18	0.777778
Ptf1a	46	60	0.766667
Olig2	18	24	0.75
Arnt:Ahr	6	8	0.75
ZNF143|STAF	6	8	0.75
DLX1	52	72	0.722222
PR	36	50	0.72
NPAS2	20	28	0.714286
HEB	30	42	0.714286
GSC	28	42	0.666667
NeuroD1	4	6	0.666667
Tcf12	4	6	0.666667
HIC1	16	24	0.666667
Tbx6	8	12	0.666667
EBF2	8	12	0.666667
ZEB1	16	24	0.666667
TCF4	12	18	0.666667
CArG	4	6	0.666667
ZBTB12	4	6	0.666667
Nkx2.5	34	52	0.653846
E2A	26	40	0.65
FOXA1	44	68	0.647059
Atf3	14	22	0.636364
LRF	10	16	0.625
CLOCK	10	16	0.625
CRX	46	76	0.605263
Maz	12	20	0.6
Tgif2	48	80	0.6
Twist2	18	30	0.6
PU.1	6	10	0.6
AP-1	12	20	0.6
Tbx5	38	64	0.59375
Tgif1	48	82	0.585366
Nkx2.1	38	66	0.575758
RUNX1	8	14	0.571429
2025-10-04	8	14	0.571429
bZIP:IRF	8	14	0.571429
LHX9	58	104	0.557692
KLF5	10	18	0.555556
SCL	52	94	0.553191
Unknown	14	26	0.538462
ETV1	14	26	0.538462
MNT	14	26	0.538462
NF1-halfsite	14	26	0.538462
FOXK1	14	26	0.538462
TATA-Box	28	52	0.538462
Bapx1	34	64	0.53125
Lhx3	74	140	0.528571
Lhx1	56	106	0.528302
DLX2	60	114	0.526316
Nkx6.1	74	146	0.506849
Max	10	20	0.5
TEAD3	10	20	0.5
Ascl1	6	12	0.5
KLF10	12	24	0.5
p63	2	4	0.5
Tbx20	2	4	0.5
Klf4	2	4	0.5
c-Jun-CRE	2	4	0.5
PSE	6	12	0.5
CEBP:AP1	14	28	0.5
bHLHE41	12	24	0.5
Fox:Ebox	6	12	0.5
Etv2	8	16	0.5
FoxL2	16	32	0.5
Elk1	6	12	0.5
PPARE	6	12	0.5
PAX5	4	8	0.5
Otx2	8	16	0.5
GATA3	26	52	0.5
EAR2	6	12	0.5
CEBP:CEBP	2	4	0.5
Nkx3.1	24	48	0.5
FOXK2	6	12	0.5
Nanog	50	100	0.5
CHR	12	24	0.5
COUP-TFII	16	32	0.5
SF1	2	4	0.5
SCRT1	2	4	0.5
En1	70	142	0.492958
Lhx2	34	70	0.485714
Pit1	28	58	0.482759
Nkx2.2	22	46	0.478261
NPAS	22	46	0.478261
DLX5	18	38	0.473684
Prop1	34	72	0.472222
Mef2b	16	34	0.470588
Bcl6	14	30	0.466667
Sp2	10	22	0.454545
HOXB13	18	40	0.45
2025-10-11	8	18	0.444444
ZNF711	16	36	0.444444
KLF1	8	18	0.444444
Cdx2	14	32	0.4375
OCT:OCT	54	124	0.435484
AR-halfsite	26	60	0.433333
c-Myc	6	14	0.428571
PPARa	6	14	0.428571
Pitx1	66	154	0.428571
Hoxd11	42	98	0.428571
Foxo1	16	38	0.421053
Hoxa13	58	138	0.42029
TRPS1	28	68	0.411765
Foxf1	18	44	0.409091
Srebp1a	4	10	0.4
Srebp2	4	10	0.4
ELF1	4	10	0.4
NFkB-p65	4	10	0.4
Stat3	4	10	0.4
CREB5	4	10	0.4
PGR	4	10	0.4
n-Myc	4	10	0.4
RUNX-AML	4	10	0.4
Tbr1	12	30	0.4
TEAD1	8	20	0.4
PRDM15	8	20	0.4
Erra	14	36	0.388889
Hoxd13	34	88	0.386364
Six2	10	26	0.384615
2025-10-02	10	26	0.384615
ETS1	10	26	0.384615
Hoxa11	42	110	0.381818
OCT:OCT-short	16	42	0.380952
MafA	6	16	0.375
Npas4	6	16	0.375
Atoh1	6	16	0.375
PU.1-IRF	8	22	0.363636
AMYB	8	22	0.363636
Isl1	26	72	0.361111
Hoxd12	24	68	0.352941
BMAL1	28	80	0.35
Phox2a	16	46	0.347826
Meis1	16	46	0.347826
Hoxa9	30	88	0.340909
NFAT	6	18	0.333333
CDX4	16	48	0.333333
Elk4	4	12	0.333333
Pitx1:Ebox	2	6	0.333333
Pax7	12	36	0.333333
EWS:FLI1-fusion	2	6	0.333333
Hoxd10	8	24	0.333333
ZFX	12	36	0.333333
Atf7	2	6	0.333333
ERRg	2	6	0.333333
ERG	10	30	0.333333
KLF14	14	42	0.333333
NFY	4	12	0.333333
Hand2	2	6	0.333333
HOXA1	2	6	0.333333
PBX2	10	30	0.333333
Sp1	2	6	0.333333
Rfx5	2	6	0.333333
HIF-1b	6	18	0.333333
PAX3:FKHR-fusion	2	6	0.333333
Phox2b	10	30	0.333333
STAT1	2	6	0.333333
Six1	2	6	0.333333
Sox15	8	24	0.333333
THRb	24	76	0.315789
Tbx21	8	26	0.307692
CEBP	8	26	0.307692
MITF	8	26	0.307692
Zac1	14	46	0.304348
Eomes	14	46	0.304348
MYB	12	40	0.3
BMYB	8	28	0.285714
Smad2	4	14	0.285714
Sp5	4	14	0.285714
Pdx1	8	28	0.285714
Hnf6b	10	36	0.277778
Mef2a	6	22	0.272727
Foxo3	6	22	0.272727
Cux2	6	22	0.272727
Smad3	12	44	0.272727
FoxD3	8	30	0.266667
Rbpj1	8	30	0.266667
LEF1	4	16	0.25
STAT5	2	8	0.25
GRE	2	8	0.25
KLF3	2	8	0.25
AP-2gamma	4	16	0.25
Sox9	4	16	0.25
AP-2alpha	4	16	0.25
GABPA	4	16	0.25
SpiB	2	8	0.25
NF1	2	8	0.25
GATA	4	16	0.25
Zic	4	16	0.25
WT1	2	8	0.25
Gata2	4	18	0.222222
EWS:ERG-fusion	4	18	0.222222
Sox6	8	36	0.222222
RXR	4	18	0.222222
Gata1	4	18	0.222222
Gata4	6	28	0.214286
ELF3	2	10	0.2
ELF5	2	10	0.2
STAT6	10	50	0.2
Rfx6	2	10	0.2
STAT4	8	44	0.181818
FOXP1	2	12	0.166667
TEAD2	2	12	0.166667
HNF6	4	24	0.166667
EHF	4	26	0.153846
Fli1	4	26	0.153846
IRF4	2	14	0.142857
Gfi1b	2	14	0.142857
Stat3+il21	4	30	0.133333
Sox10	4	30	0.133333
ZNF416	4	32	0.125
Usf2	2	16	0.125
Sox3	4	32	0.125
Gata6	4	34	0.117647
TEAD4	2	18	0.111111
CUX1	6	58	0.103448
Barx1	2	22	0.0909091
Mef2c	2	40	0.05
ZNF41	0	2	0
Tcfcp2l1	0	4	0
p53	0	4	0
Tlx?	0	2	0
ZNF519	0	2	0
ZNF692	0	4	0
Tcf7	0	4	0
ZNF341	0	4	0
Zfp281	0	2	0
ZNF675	0	2	0
Zic2	0	4	0
Zic3	0	10	0
ZNF189	0	14	0
ZNF264	0	12	0
Zfp57	0	16	0
VDR	0	4	0
Mef2d	0	8	0
THRa	0	6	0
TFE3	0	4	0
Hoxb4	0	6	0
Hoxa10	0	16	0
HRE	0	8	0
HOXA2	0	2	0
HIF-1a	0	2	0
Gli2	0	10	0
GLI3	0	2	0
FXR	0	4	0
Esrrb	0	2	0
Elf4	0	22	0
Egr1	0	8	0
ETS:E-box	0	4	0
ETS	0	8	0
EBF	0	6	0
Duxbl	0	2	0
CTCF	0	2	0
Brn2	0	12	0
Brachyury	0	8	0
Bcl11a	0	4	0
BORIS	0	2	0
ARE	0	6	0
IRF:BATF	0	6	0
Klf9	0	4	0
MYNN	0	6	0
RBPJ:Ebox	0	12	0
TEAD	0	20	0
Sox7	0	4	0
Sox4	0	10	0
Sox2	0	18	0
Sox17	0	10	0
Smad4	0	14	0
RORgt	0	6	0
RORg	0	4	0
RORa	0	4	0
RARg	0	2	0
NF1:FOXA1	0	2	0
RAR:RXR	0	2	0
Pknox1	0	6	0
Pbx3	0	6	0
PRDM9	0	6	0
PRDM10	0	10	0
PBX1	0	4	0
PAX6	0	2	0
NFkB-p50,p52	0	2	0
NFAT:AP1	0	4	0
p73	0	2	0
DMRT1	6	0
DMRT6	2	0
E2F	2	0
E2F1	2	0
E2F4	2	0
E2F6	4	0
EKLF	4	0
FOXA1:AR	8	0
GFY	2	0
HINFP	2	0
IRF1	4	0
IRF2	2	0
Reverb	2	0
SPDEF	6	0
Tbox:Smad	6	0
X-box	2	0
ZNF136	8	0
ZNF669	2	0

## Sheet: enVars list
chr	start	stop	rsID	refseq	allele	log2fc	log10pval	log10fdr	lfc.se	fold_change_ratio	p_value	enAllele	enVar	fc_category	en_category	rsID_allele
5	115596573	115596743	rs10073505	Alt	A	2.61	16.8204	16.0486	0.305564	0.62	0.0411732	TRUE	TRUE	Significant Outside Threshold	significant-enAllele	rs10073505_A
11	128760435	128760605	rs1036672180	Alt	T	0.99	59.749	58.094	0.0601012	2.07	0.00150517	TRUE	TRUE	Significant Outside Threshold	significant-enAllele	rs1036672180_T
10	44626979	44627149	rs10450471	Alt	A	0.68	47.7319	46.2971	0.0464441	1.54	0.00852048	TRUE	TRUE	Significant Outside Threshold	significant-enAllele	rs10450471_A
5	104664991	104665161	rs10479300	Alt	C	0.82	35.4101	34.2253	0.0656931	1.89	0.0232989	TRUE	TRUE	Significant Outside Threshold	significant-enAllele	rs10479300_C
8	59240430	59240600	rs10504289	Alt	C	1.14	95.5391	93.3496	0.0549147	2.17	0.00486493	TRUE	TRUE	Significant Outside Threshold	significant-enAllele	rs10504289_C
12	553587	553757	rs1056008	Alt	C	1.23	17.3658	16.5825	0.141872	2	0.00992961	TRUE	TRUE	Significant Outside Threshold	significant-enAllele	rs1056008_C
4	77919713	77919883	rs10618413	Alt	A	0.59	44.553	43.1837	0.0415664	1.26	0.0112227	TRUE	TRUE	Significant Outside Threshold	significant-enAllele	rs10618413_A
4	77872211	77872381	rs10650101	Alt	AAATTAATT	0.77	76.6016	74.6711	0.041519	1.32	0.0103693	TRUE	TRUE	Significant Outside Threshold	significant-enAllele	rs10650101_AAATTAATT
10	8507225	8507395	rs10752140	Alt	A	0.67	67.1143	65.3358	0.0382901	1.57	0.0017734	TRUE	TRUE	Significant Outside Threshold	significant-enAllele	rs10752140_A
10	44608195	44608365	rs10900077	Alt	A	0.67	39.0297	37.768	0.0504323	1.67	0.0206918	TRUE	TRUE	Significant Outside Threshold	significant-enAllele	rs10900077_A
9	11848763	11848933	rs10960318	Alt	T	0.67	50.6758	49.1815	0.0441531	1.51	0.00938272	TRUE	TRUE	Significant Outside Threshold	significant-enAllele	rs10960318_T
9	11863409	11863579	rs10960331	Alt	T	0.76	65.0415	63.2999	0.0443354	1.76	0.0142339	TRUE	TRUE	Significant Outside Threshold	significant-enAllele	rs10960331_T
10	20977929	20978099	rs11012439	Alt	A	0.61	46.3881	44.9744	0.0422887	1.52	0.0236851	TRUE	TRUE	Significant Outside Threshold	significant-enAllele	rs11012439_A
4	78008107	78008277	rs11098003	Alt	G	1.02	22.5915	21.6725	0.102815	2.53	0.0195012	TRUE	TRUE	Significant Outside Threshold	significant-enAllele	rs11098003_G
10	52505465	52505635	rs111442290	Alt	A	0.68	29.5893	28.5141	0.0595287	1.43	0.0355054	TRUE	TRUE	Significant Outside Threshold	significant-enAllele	rs111442290_A
12	69962690	69962860	rs11177999	Alt	C	0.98	58.8947	57.26	0.0601858	1.98	0.00959811	TRUE	TRUE	Significant Outside Threshold	significant-enAllele	rs11177999_C
5	56712318	56712488	rs111944656	Alt	A	0.74	4.97412	4.6396	0.167122	1.35	0.0233718	TRUE	TRUE	Significant Outside Threshold	significant-enAllele	rs111944656_A
1	150669598	150669768	rs11204689	Alt	T	4.95	42.3309	41.0063	0.359776	0.5	0.028625	TRUE	TRUE	Significant Outside Threshold	significant-enAllele	rs11204689_T
11	63120362	63120532	rs11231371	Alt	T	0.64	40.691	39.3992	0.0473739	1.86	0.00719021	TRUE	TRUE	Significant Outside Threshold	significant-enAllele	rs11231371_T
11	63123741	63123911	rs11231375	Alt	C	0.64	41.8574	40.5449	0.0469709	1.86	0.00843964	TRUE	TRUE	Significant Outside Threshold	significant-enAllele	rs11231375_C
11	63123741	63123911	rs11231375	Alt	G	0.65	41.0063	39.7091	0.0479462	1.86	0.00289166	TRUE	TRUE	Significant Outside Threshold	significant-enAllele	rs11231375_G
4	56944570	56944740	rs112564482	Alt	C	0.89	4.12085	3.8269	0.225094	1.4	0.0348903	TRUE	TRUE	Significant Outside Threshold	significant-enAllele	rs112564482_C
2	29765516	29765686	rs112649057	Alt	G	0.75	87.8842	85.8137	0.0377849	1.86	0.000118444	TRUE	TRUE	Significant Outside Threshold	significant-enAllele	rs112649057_G
12	121218157	121218327	rs112778059	Alt	T	0.89	7.73062	7.27944	0.158725	0.66	0.014505	TRUE	TRUE	Significant Outside Threshold	significant-enAllele	rs112778059_T
3	114214151	114214321	rs113015898	Alt	A	0.71	63.678	61.9656	0.0418571	1.27	0.00455811	TRUE	TRUE	Significant Outside Threshold	significant-enAllele	rs113015898_A
10	8528644	8528814	rs113573208	Alt	C	1	5.97601	5.59609	0.205299	0.67	0.0140872	TRUE	TRUE	Significant Outside Threshold	significant-enAllele	rs113573208_C
11	63130726	63130896	rs11518687	Alt	T	0.61	41.933	40.616	0.0447282	1.31	0.013081	TRUE	TRUE	Significant Outside Threshold	significant-enAllele	rs11518687_T
1	150597677	150597847	rs11585460	Alt	C	3.07	60.5679	58.8975	0.185992	0.21	0.014634	TRUE	TRUE	Significant Outside Threshold	significant-enAllele	rs11585460_C
10	44518383	44518553	rs11593439	Alt	T	0.7	60.7773	59.1041	0.0425274	1.41	0.00550623	TRUE	TRUE	Significant Outside Threshold	significant-enAllele	rs11593439_T
10	44577008	44577178	rs11598774	Alt	A	0.73	41.5885	40.2828	0.0535772	1.26	0.025115	TRUE	TRUE	Significant Outside Threshold	significant-enAllele	rs11598774_A
19	14334022	14334192	rs11669111	Alt	T	0.61	49.343	47.8791	0.0409453	1.46	0.0130724	TRUE	TRUE	Significant Outside Threshold	significant-enAllele	rs11669111_T
19	14334241	14334411	rs11669181	Alt	G	1.52	127.88	125.329	0.0631686	1.26	0.0103965	TRUE	TRUE	Significant Outside Threshold	significant-enAllele	rs11669181_G
7	120598332	120598502	rs116874936	Alt	C	0.63	32.3281	31.2014	0.0528533	1.43	0.0124999	TRUE	TRUE	Significant Outside Threshold	significant-enAllele	rs116874936_C
20	15319171	15319341	rs116981213	Alt	C	0.62	6.71774	6.30578	0.11924	1.33	0.000506309	TRUE	TRUE	Significant Outside Threshold	significant-enAllele	rs116981213_C
7	120241437	120241607	rs117558234	Alt	G	0.63	15.0266	14.3105	0.0787271	1.43	0.00475616	TRUE	TRUE	Significant Outside Threshold	significant-enAllele	rs117558234_G
5	42975267	42975437	rs117868974	Alt	C	0.72	40.1213	38.8385	0.0535343	1.64	0.038495	TRUE	TRUE	Significant Outside Threshold	significant-enAllele	rs117868974_C
7	120234590	120234760	rs118009815	Alt	A	0.69	84.0014	81.9785	0.0356087	1.58	0.00277493	TRUE	TRUE	Significant Outside Threshold	significant-enAllele	rs118009815_A
2	157955445	157955615	rs11900941	Alt	T	0.91	43.4166	42.0648	0.0656134	0.24	0.0133757	TRUE	TRUE	Significant Outside Threshold	significant-enAllele	rs11900941_T
3	63493709	63493879	rs11921202	Alt	C	0.61	39.8167	38.5408	0.0455071	1.27	0.00455429	TRUE	TRUE	Significant Outside Threshold	significant-enAllele	rs11921202_C
7	16922646	16922816	rs1193887803	Alt	C	1.18	106.173	103.84	0.0536858	2.32	0.0128243	TRUE	TRUE	Significant Outside Threshold	significant-enAllele	rs1193887803_C
9	12172687	12172857	rs12002165	Alt	A	0.64	36.6113	35.3991	0.0497931	1.58	0.006291	TRUE	TRUE	Significant Outside Threshold	significant-enAllele	rs12002165_A
14	40972836	40973006	rs12147567	Alt	A	0.61	34.0095	32.8492	0.0494958	1.41	0.00380682	TRUE	TRUE	Significant Outside Threshold	significant-enAllele	rs12147567_A
14	24599804	24599974	rs1215473741	Alt	T	0.9	97.6137	95.3999	0.0425847	2.34	0.000493303	TRUE	TRUE	Significant Outside Threshold	significant-enAllele	rs1215473741_T
9	12197461	12197631	rs12343602	Alt	T	0.6	43.941	42.5822	0.0429917	1.4	0.0316146	TRUE	TRUE	Significant Outside Threshold	significant-enAllele	rs12343602_T
1	204892158	204892328	rs12405378	Alt	A	0.74	6.41244	6.01352	0.145011	1.81	0.00242766	TRUE	TRUE	Significant Outside Threshold	significant-enAllele	rs12405378_A
14	96286890	96287060	rs12435477	Alt	T	1.95	42.5332	41.2048	0.141714	0.7	0.00169271	TRUE	TRUE	Significant Outside Threshold	significant-enAllele	rs12435477_T
3	159269000	159269170	rs12696092	Alt	A	0.65	31.3079	30.1983	0.0548893	1.28	0.0479297	TRUE	TRUE	Significant Outside Threshold	significant-enAllele	rs12696092_A
15	68722778	68722948	rs12898796	Alt	C	0.66	51.6046	50.0938	0.0431182	0.31	0.0182006	TRUE	TRUE	Significant Outside Threshold	significant-enAllele	rs12898796_C
8	57372698	57372868	rs1301181855	Alt	T	0.59	17.3438	16.561	0.0680226	1.32	0.0135116	TRUE	TRUE	Significant Outside Threshold	significant-enAllele	rs1301181855_T
4	77983069	77983239	rs13111807	Alt	A	0.96	17.9064	17.1109	0.108485	2.07	0.0139333	TRUE	TRUE	Significant Outside Threshold	significant-enAllele	rs13111807_A
5	23350447	23350617	rs13174020	Alt	T	0.94	63.8172	62.0985	0.0554059	1.97	0.00633711	TRUE	TRUE	Significant Outside Threshold	significant-enAllele	rs13174020_T
13	71463377	71463547	rs13378132	Alt	T	0.92	84.3955	82.3661	0.0472176	1.54	0.0214968	TRUE	TRUE	Significant Outside Threshold	significant-enAllele	rs13378132_T
2	4846569	4846739	rs13386955	Alt	G	0.73	3.1266	2.88449	0.216389	1.34	0.0113554	TRUE	TRUE	Significant Outside Threshold	significant-enAllele	rs13386955_G
4	111872555	111872725	rs13435545	Alt	C	0.62	24.2743	23.3125	0.0600136	1.66	0.0266367	TRUE	TRUE	Significant Outside Threshold	significant-enAllele	rs13435545_C
6	76858626	76858796	rs13437574	Alt	A	1.05	15.1054	14.387	0.130292	2.58	0.0300026	TRUE	TRUE	Significant Outside Threshold	significant-enAllele	rs13437574_A
4	77914643	77914813	rs138553129	Alt	GTGTGTGTT	0.7	33.1506	32.0093	0.0575565	1.28	0.00504314	TRUE	TRUE	Significant Outside Threshold	significant-enAllele	rs138553129_GTGTGTGTT
6	22675513	22675683	rs1391839151	Alt	A	0.61	28.2781	27.2321	0.0541755	1.43	0.0116762	TRUE	TRUE	Significant Outside Threshold	significant-enAllele	rs1391839151_A
3	114197195	114197365	rs139256738	Alt	A	0.98	161.223	158.274	0.0360464	1.4	0.00457136	TRUE	TRUE	Significant Outside Threshold	significant-enAllele	rs139256738_A
5	42929341	42929511	rs139806257	Alt	GCC	0.69	47.3704	45.9438	0.0473431	1.68	0.0015083	TRUE	TRUE	Significant Outside Threshold	significant-enAllele	rs139806257_GCC
12	69978629	69978799	rs141011538	Alt	T	0.75	35.3037	34.1213	0.059916	1.81	0.010729	TRUE	TRUE	Significant Outside Threshold	significant-enAllele	rs141011538_T
5	104650292	104650462	rs141130013	Alt	AGGAGAG	0.67	34.8323	33.6599	0.0538361	1.37	0.0216531	TRUE	TRUE	Significant Outside Threshold	significant-enAllele	rs141130013_AGGAGAG
12	86219285	86219455	rs141926480	Alt	TA	0.81	109.135	106.767	0.0363218	1.94	0.000657519	TRUE	TRUE	Significant Outside Threshold	significant-enAllele	rs141926480_TA
10	52251106	52251276	rs142827018	Alt	C	0.64	76.1617	74.2414	0.0345658	1.63	0.0101939	TRUE	TRUE	Significant Outside Threshold	significant-enAllele	rs142827018_C
5	128688411	128688581	rs145352487	Alt	A	0.64	71.7999	69.9519	0.0352893	1.66	0.00537817	TRUE	TRUE	Significant Outside Threshold	significant-enAllele	rs145352487_A
7	31006688	31006858	rs1476700	Alt	C	0.87	61.1944	59.5124	0.0526608	1.39	0.00442204	TRUE	TRUE	Significant Outside Threshold	significant-enAllele	rs1476700_C
19	36760101	36760271	rs147887366	Alt	T	4.93	53.1979	51.6553	0.318688	2.17	0.0214883	TRUE	TRUE	Significant Outside Threshold	significant-enAllele	rs147887366_T
1	150743552	150743722	rs1482741431	Alt	A	1.04	6.74779	6.33488	0.199654	2	0.0242373	TRUE	TRUE	Significant Outside Threshold	significant-enAllele	rs1482741431_A
4	56908713	56908883	rs149300866	Alt	A	1.04	61.3415	59.6566	0.0627113	1.43	0.0173121	TRUE	TRUE	Significant Outside Threshold	significant-enAllele	rs149300866_A
10	44549285	44549455	rs150227695	Alt	CAA	1.12	107.156	104.802	0.0508162	0.69	0.000652072	TRUE	TRUE	Significant Outside Threshold	significant-enAllele	rs150227695_CAA
12	86245361	86245531	rs1542780	Alt	T	0.67	54.9392	53.3611	0.0428131	1.44	0.000297456	TRUE	TRUE	Significant Outside Threshold	significant-enAllele	rs1542780_T
5	42900726	42900896	rs16872900	Alt	C	0.66	52.9084	51.3721	0.0430576	1.54	0.00105322	TRUE	TRUE	Significant Outside Threshold	significant-enAllele	rs16872900_C
4	77841900	77842070	rs17002829	Alt	T	0.6	24.4963	23.5308	0.0574727	1.66	0.00305401	TRUE	TRUE	Significant Outside Threshold	significant-enAllele	rs17002829_T
10	8512412	8512582	rs17388957	Alt	A	1.68	Inf	Inf	0.0402111	2.01	0.000915346	TRUE	TRUE	Significant Outside Threshold	significant-enAllele	rs17388957_A
6	158345029	158345199	rs1754408	Alt	T	0.68	7.81483	7.36027	0.120462	1.6	0.0251786	TRUE	TRUE	Significant Outside Threshold	significant-enAllele	rs1754408_T
6	158344432	158344602	rs1754410	Alt	C	0.96	87.6438	85.5769	0.0482579	2.21	0.0107558	TRUE	TRUE	Significant Outside Threshold	significant-enAllele	rs1754410_C
3	141536372	141536542	rs181984040	Alt	C	0.6	66.8546	65.0815	0.0343988	1.27	0.0263321	TRUE	TRUE	Significant Outside Threshold	significant-enAllele	rs181984040_C
20	5807096	5807266	rs185663247	Alt	G	0.67	33.4675	32.3177	0.0550143	1.9	0.00751768	TRUE	TRUE	Significant Outside Threshold	significant-enAllele	rs185663247_G
9	131059523	131059693	rs1889750	Alt	G	1.56	51.7105	50.1967	0.102132	1.69	0.00674183	TRUE	TRUE	Significant Outside Threshold	significant-enAllele	rs1889750_G
18	2100918	2101088	rs1909424155	Alt	C	0.68	43.9466	42.5871	0.0486464	1.4	0.013737	TRUE	TRUE	Significant Outside Threshold	significant-enAllele	rs1909424155_C
13	71421541	71421711	rs1931456	Alt	A	0.59	51.5404	50.0305	0.0388643	1.62	0.00387663	TRUE	TRUE	Significant Outside Threshold	significant-enAllele	rs1931456_A
1	150699701	150699871	rs1932864	Alt	C	0.83	143.872	141.117	0.0325016	1.36	0.00110484	TRUE	TRUE	Significant Outside Threshold	significant-enAllele	rs1932864_C
11	63142712	63142882	rs1939751	Alt	G	0.64	83.4887	81.4721	0.0330585	1.3	0.00370147	TRUE	TRUE	Significant Outside Threshold	significant-enAllele	rs1939751_G
3	49997119	49997289	rs1986599	Alt	G	0.61	39.2805	38.016	0.0461061	1.77	0.00409358	TRUE	TRUE	Significant Outside Threshold	significant-enAllele	rs1986599_G
4	77883103	77883273	rs200185252	Alt	T	0.75	89.4385	87.3383	0.0371054	1.31	0.0182842	TRUE	TRUE	Significant Outside Threshold	significant-enAllele	rs200185252_T
15	68721675	68721845	rs201554648	Alt	A	0.63	23.8821	22.9332	0.0617263	1.7	0.00632112	TRUE	TRUE	Significant Outside Threshold	significant-enAllele	rs201554648_A
3	114224069	114224239	rs201658819	Alt	A	0.68	21.4104	20.5163	0.0700697	1.96	0.00536842	TRUE	TRUE	Significant Outside Threshold	significant-enAllele	rs201658819_A
3	188134613	188134783	rs2046060	Alt	T	0.59	24.3629	23.3994	0.0566894	0.67	0.0255914	TRUE	TRUE	Significant Outside Threshold	significant-enAllele	rs2046060_T
1	15078109	15078279	rs2137643	Alt	A	1.57	20.3264	19.4621	0.167101	1.36	0.0380369	TRUE	TRUE	Significant Outside Threshold	significant-enAllele	rs2137643_A
1	15078109	15078279	rs2137643	Alt	G	1.47	9.52118	8.99743	0.233838	1.27	0.0214831	TRUE	TRUE	Significant Outside Threshold	significant-enAllele	rs2137643_G
4	77996593	77996763	rs2174079	Alt	A	0.68	47.7215	46.2876	0.0462464	1.32	0.00638902	TRUE	TRUE	Significant Outside Threshold	significant-enAllele	rs2174079_A
12	86239321	86239491	rs2452802	Alt	T	1.21	82.5576	80.5566	0.0625855	2.32	0.00255731	TRUE	TRUE	Significant Outside Threshold	significant-enAllele	rs2452802_T
17	46217601	46217771	rs2458206	Alt	C	3.53	49.4574	47.9917	0.236961	2.27	0.00465452	TRUE	TRUE	Significant Outside Threshold	significant-enAllele	rs2458206_C
12	86212678	86212848	rs2471558	Alt	G	1.17	149.176	146.365	0.0449024	1.27	0.0126753	TRUE	TRUE	Significant Outside Threshold	significant-enAllele	rs2471558_G
1	118372979	118373149	rs2493814	Alt	T	1.02	64.8758	63.1375	0.059713	1.34	0.0207873	TRUE	TRUE	Significant Outside Threshold	significant-enAllele	rs2493814_T
1	118379161	118379331	rs2493817	Alt	G	5.13	54.8219	53.2449	0.326644	1.58	0.0432726	TRUE	TRUE	Significant Outside Threshold	significant-enAllele	rs2493817_G
6	30930580	30930750	rs2517457	Alt	T	1.13	61.5641	59.8762	0.0678454	1.45	0.0167414	TRUE	TRUE	Significant Outside Threshold	significant-enAllele	rs2517457_T
6	30930572	30930742	rs2532927	Alt	G	1.11	39.9798	38.7004	0.0833636	1.71	0.0169486	TRUE	TRUE	Significant Outside Threshold	significant-enAllele	rs2532927_G
6	30925364	30925534	rs2532939	Alt	G	0.93	52.8643	51.3302	0.0603936	1.61	0.00158072	TRUE	TRUE	Significant Outside Threshold	significant-enAllele	rs2532939_G
5	115509100	115509270	rs2546484	Alt	G	0.62	37.137	35.9147	0.0478975	1.42	0.00186016	TRUE	TRUE	Significant Outside Threshold	significant-enAllele	rs2546484_G
6	31396426	31396596	rs28366140	Alt	A	0.6	30.1449	29.062	0.0523026	1.41	0.0165037	TRUE	TRUE	Significant Outside Threshold	significant-enAllele	rs28366140_A
7	16932222	16932392	rs28516514	Alt	C	0.68	40.1987	38.9146	0.0505017	1.32	0.00612373	TRUE	TRUE	Significant Outside Threshold	significant-enAllele	rs28516514_C
4	167921769	167921939	rs28733207	Alt	A	0.95	90.0456	87.9337	0.0472223	1.35	0.00819654	TRUE	TRUE	Significant Outside Threshold	significant-enAllele	rs28733207_A
14	88089015	88089185	rs2896074	Alt	C	0.68	5.15658	4.81415	0.152077	1.3	0.0264662	TRUE	TRUE	Significant Outside Threshold	significant-enAllele	rs2896074_C
6	30860744	30860914	rs3094109	Alt	C	0.96	60.8345	59.1583	0.0582688	1.92	0.0223829	TRUE	TRUE	Significant Outside Threshold	significant-enAllele	rs3094109_C
6	30840086	30840256	rs3130786	Alt	G	3.87	28.4936	27.4431	0.344481	1.49	0.0262305	TRUE	TRUE	Significant Outside Threshold	significant-enAllele	rs3130786_G
6	30849003	30849173	rs3132578	Alt	C	0.69	43.2702	41.9231	0.0494963	1.41	0.00880329	TRUE	TRUE	Significant Outside Threshold	significant-enAllele	rs3132578_C
1	150959712	150959882	rs34090972	Alt	T	2.48	12.243	11.6225	0.344127	0.42	0.00770615	TRUE	TRUE	Significant Outside Threshold	significant-enAllele	rs34090972_T
5	23330058	23330228	rs34233388	Alt	G	0.88	47.1932	45.7675	0.0603957	1.79	0.00618508	TRUE	TRUE	Significant Outside Threshold	significant-enAllele	rs34233388_G
14	88070474	88070644	rs34574569	Alt	AGG	0.6	31.5577	30.4447	0.0505869	1.36	0.00706689	TRUE	TRUE	Significant Outside Threshold	significant-enAllele	rs34574569_AGG
14	40922465	40922635	rs35390677	Alt	AATAGATAG	1.06	76.0257	74.108	0.0569591	2.01	0.00657614	TRUE	TRUE	Significant Outside Threshold	significant-enAllele	rs35390677_AATAGATAG
11	63115673	63115843	rs35701491	Alt	ATTT	0.73	43.0412	41.6995	0.0526964	1.3	0.0139382	TRUE	TRUE	Significant Outside Threshold	significant-enAllele	rs35701491_ATTT
3	159382198	159382368	rs36157464	Alt	A	0.61	16.1314	15.3794	0.0735927	1.44	0.0177699	TRUE	TRUE	Significant Outside Threshold	significant-enAllele	rs36157464_A
5	42979872	42980042	rs372217900	Alt	C	0.84	89.1279	87.0391	0.0420115	1.48	0.00875964	TRUE	TRUE	Significant Outside Threshold	significant-enAllele	rs372217900_C
20	34999310	34999480	rs3746435	Alt	C	1.01	73.2205	71.3573	0.0555647	2.3	0.00383632	TRUE	TRUE	Significant Outside Threshold	significant-enAllele	rs3746435_C
7	119907733	119907903	rs376426370	Alt	A	0.68	73.7724	71.9024	0.037425	0.71	0.00858564	TRUE	TRUE	Significant Outside Threshold	significant-enAllele	rs376426370_A
1	150876120	150876290	rs3820541	Alt	C	0.61	41.6005	40.2942	0.0450611	1.46	0.0113258	TRUE	TRUE	Significant Outside Threshold	significant-enAllele	rs3820541_C
6	158325075	158325245	rs3936974	Alt	C	0.7	13.3743	12.7137	0.0930373	2.06	0.00841636	TRUE	TRUE	Significant Outside Threshold	significant-enAllele	rs3936974_C
4	56872970	56873140	rs397881114	Alt	AAT	0.81	58.9572	57.3198	0.0494273	1.7	0.00992131	TRUE	TRUE	Significant Outside Threshold	significant-enAllele	rs397881114_AAT
14	40914775	40914945	rs3985203	Alt	GTTAC	1.33	106.129	103.801	0.0605578	1.46	0.00175621	TRUE	TRUE	Significant Outside Threshold	significant-enAllele	rs3985203_GTTAC
4	77851536	77851706	rs4078523	Alt	C	0.92	49.8157	48.3409	0.0612957	1.5	0.0201125	TRUE	TRUE	Significant Outside Threshold	significant-enAllele	rs4078523_C
4	77851536	77851706	rs4078523	Alt	T	0.71	45.173	43.7869	0.0496572	1.3	0.0145128	TRUE	TRUE	Significant Outside Threshold	significant-enAllele	rs4078523_T
3	50850346	50850516	rs4130897	Alt	T	0.63	52.1126	50.5887	0.0413131	1.39	0.00410976	TRUE	TRUE	Significant Outside Threshold	significant-enAllele	rs4130897_T
6	158339132	158339302	rs4708789	Alt	T	0.99	64.0374	62.3139	0.0585138	1.5	0.0218681	TRUE	TRUE	Significant Outside Threshold	significant-enAllele	rs4708789_T
11	63137602	63137772	rs4963249	Alt	G	0.66	51.777	50.2612	0.0431852	1.38	0.0149494	TRUE	TRUE	Significant Outside Threshold	significant-enAllele	rs4963249_G
10	8214257	8214427	rs557571668	Alt	T	0.62	59.8899	58.2308	0.0375307	1.43	0.00926765	TRUE	TRUE	Significant Outside Threshold	significant-enAllele	rs557571668_T
18	3066542	3066712	rs559405101	Alt	T	0.64	66.079	64.3167	0.0373348	1.94	0.00318495	TRUE	TRUE	Significant Outside Threshold	significant-enAllele	rs559405101_T
X	80296341	80296511	rs56197033	Alt	C	0.72	55.054	53.4748	0.0459904	1.99	0.000758006	TRUE	TRUE	Significant Outside Threshold	significant-enAllele	rs56197033_C
16	86353959	86354129	rs562818853	Alt	T	0.64	41.69	40.3813	0.0468487	1.33	0.0305777	TRUE	TRUE	Significant Outside Threshold	significant-enAllele	rs562818853_T
7	16922569	16922739	rs56383312	Alt	T	0.63	38.5937	37.3402	0.0476895	1.58	0.0173672	TRUE	TRUE	Significant Outside Threshold	significant-enAllele	rs56383312_T
5	56750487	56750657	rs56793118	Alt	C	0.59	68.1579	66.3664	0.0335087	1.42	0.000517991	TRUE	TRUE	Significant Outside Threshold	significant-enAllele	rs56793118_C
3	142667539	142667709	rs568301216	Alt	G	0.96	18.7648	17.9433	0.10668	1.44	0.00539651	TRUE	TRUE	Significant Outside Threshold	significant-enAllele	rs568301216_G
10	104182461	104182631	rs569856	Alt	C	0.67	48.1305	46.6882	0.0457823	1.53927	0.00657353	TRUE	TRUE	Significant Outside Threshold	significant-enAllele	rs569856_C
4	119096041	119096211	rs57456370	Alt	T	6.33	179.577	176.465	0.221114	2.36784	0.00209759	TRUE	TRUE	Significant Outside Threshold	significant-enAllele	rs57456370_T
11	63106624	63106794	rs58037172	Alt	G	0.86	85.5306	83.4879	0.043443	1.68302	0.00424352	TRUE	TRUE	Significant Outside Threshold	significant-enAllele	rs58037172_G
4	111858561	111858731	rs58355643	Alt	G	0.63	50.2379	48.754	0.041805	1.86651	0.000110443	TRUE	TRUE	Significant Outside Threshold	significant-enAllele	rs58355643_G
10	20990284	20990454	rs58569619	Alt	C	1.02	14.0954	13.411	0.13168	1.28957	0.0292474	TRUE	TRUE	Significant Outside Threshold	significant-enAllele	rs58569619_C
4	4604073	4604243	rs59490507	Alt	CAGGAGGTG	0.83	68.8465	67.0473	0.0469053	1.60775	0.00153607	TRUE	TRUE	Significant Outside Threshold	significant-enAllele	rs59490507_CAGGAGGTG
20	34966873	34967043	rs6120772	Alt	T	3.51	24.1966	23.2392	0.340686	0.621766	0.0234184	TRUE	TRUE	Significant Outside Threshold	significant-enAllele	rs6120772_T
5	104581045	104581215	rs62362459	Alt	G	0.63	38.6463	37.3907	0.0481952	1.58799	0.0167736	TRUE	TRUE	Significant Outside Threshold	significant-enAllele	rs62362459_G
7	114208627	114208797	rs62469189	Alt	C	3.92	54.7504	53.177	0.249887	4.15179	0.00451639	TRUE	TRUE	Significant Outside Threshold	significant-enAllele	rs62469189_C
6	158307906	158308076	rs6455564	Alt	T	0.74	90.2947	88.1749	0.036576	1.28366	0.0119795	TRUE	TRUE	Significant Outside Threshold	significant-enAllele	rs6455564_T
6	158335622	158335792	rs6455579	Alt	G	0.61	42.2389	40.9169	0.044752	1.25044	0.0357432	TRUE	TRUE	Significant Outside Threshold	significant-enAllele	rs6455579_G
12	86190310	86190480	rs6538022	Alt	T	0.69	65.5857	63.8373	0.0401509	1.67	0.00270104	TRUE	TRUE	Significant Outside Threshold	significant-enAllele	rs6538022_T
13	74660020	74660190	rs6562839	Alt	A	2.04	71.5619	69.7204	0.113459	0.498656	0.00228775	TRUE	TRUE	Significant Outside Threshold	significant-enAllele	rs6562839_A
13	74660020	74660190	rs6562839	Alt	T	1.26	16.2352	15.4793	0.150295	0.289933	0.00487058	TRUE	TRUE	Significant Outside Threshold	significant-enAllele	rs6562839_T
11	63113506	63113676	rs6591746	Alt	A	2.42	33.1536	32.0119	0.199212	0.191237	0.0265989	TRUE	TRUE	Significant Outside Threshold	significant-enAllele	rs6591746_A
11	63113506	63113676	rs6591746	Alt	G	2.34	31.1426	30.0366	0.199067	0.181119	0.0271953	TRUE	TRUE	Significant Outside Threshold	significant-enAllele	rs6591746_G
11	63113506	63113676	rs6591746	Alt	T	3.1	37.3426	36.1167	0.240473	0.307409	0.0248236	TRUE	TRUE	Significant Outside Threshold	significant-enAllele	rs6591746_T
2	23481919	23482089	rs6728515	Alt	T	0.63	46.1942	44.7852	0.0436221	1.62035	0.00112495	TRUE	TRUE	Significant Outside Threshold	significant-enAllele	rs6728515_T
2	29641701	29641871	rs6757641	Alt	C	0.6	37.764	36.5313	0.046509	1.57474	0.0134612	TRUE	TRUE	Significant Outside Threshold	significant-enAllele	rs6757641_C
3	178647048	178647218	rs6789584	Alt	A	0.78	69.0858	67.2847	0.044015	1.9191	0.00543475	TRUE	TRUE	Significant Outside Threshold	significant-enAllele	rs6789584_A
4	167923059	167923229	rs6834016	Alt	G	0.77	45.8842	44.4837	0.0535995	1.74376	0.010942	TRUE	TRUE	Significant Outside Threshold	significant-enAllele	rs6834016_G
4	4640330	4640500	rs6858685	Alt	G	4.75	50.4979	49.0084	0.315326	0.248149	0.031452	TRUE	TRUE	Significant Outside Threshold	significant-enAllele	rs6858685_G
4	4640330	4640500	rs6858685	Alt	T	6.3	88.8203	86.7352	0.314105	0.729107	0.0245943	TRUE	TRUE	Significant Outside Threshold	significant-enAllele	rs6858685_T
5	42968898	42969068	rs6898323	Alt	C	0.66	50.2037	48.7207	0.0441564	1.37501	0.00150741	TRUE	TRUE	Significant Outside Threshold	significant-enAllele	rs6898323_C
6	158311199	158311369	rs6907623	Alt	T	0.65	42.8032	41.4661	0.0472122	1.26352	0.0152007	TRUE	TRUE	Significant Outside Threshold	significant-enAllele	rs6907623_T
6	11974313	11974483	rs6919575	Alt	A	0.59	36.5743	35.3635	0.0464557	1.28897	0.0301615	TRUE	TRUE	Significant Outside Threshold	significant-enAllele	rs6919575_A
8	105506992	105507162	rs7003261	Alt	C	0.73	16.8736	16.1009	0.0857794	1.45271	0.00758238	TRUE	TRUE	Significant Outside Threshold	significant-enAllele	rs7003261_C
9	131061796	131061966	rs7032149	Alt	A	0.74	53.4541	51.9072	0.0476355	1.40327	0.0111366	TRUE	TRUE	Significant Outside Threshold	significant-enAllele	rs7032149_A
14	40888944	40889114	rs7145109	Alt	A	0.88	69.4444	67.6316	0.0499265	1.70632	0.0162421	TRUE	TRUE	Significant Outside Threshold	significant-enAllele	rs7145109_A
9	12208789	12208959	rs71489573	Alt	ATT	0.73	45.6342	44.2383	0.0508323	1.53738	0.00931701	TRUE	TRUE	Significant Outside Threshold	significant-enAllele	rs71489573_ATT
5	43086222	43086392	rs72746786	Alt	T	0.92	59.059	57.4163	0.0565903	1.41397	0.00633478	TRUE	TRUE	Significant Outside Threshold	significant-enAllele	rs72746786_T
10	8523904	8524074	rs72775257	Alt	A	0.59	74.6651	72.7837	0.032154	1.53398	0.00604081	TRUE	TRUE	Significant Outside Threshold	significant-enAllele	rs72775257_A
10	8549006	8549176	rs72775287	Alt	C	0.66	34.5703	33.4029	0.0533364	1.28336	0.0392215	TRUE	TRUE	Significant Outside Threshold	significant-enAllele	rs72775287_C
12	86289691	86289861	rs7303642	Alt	A	0.79	47.7028	46.2696	0.0539094	1.74011	0.00417609	TRUE	TRUE	Significant Outside Threshold	significant-enAllele	rs7303642_A
3	178625147	178625317	rs73042339	Alt	A	0.59	41.7986	40.4874	0.0428491	1.73403	0.00622853	TRUE	TRUE	Significant Outside Threshold	significant-enAllele	rs73042339_A
20	35024767	35024937	rs7362224	Alt	C	0.92	24.7916	23.8185	0.0881371	2.19743	0.0103572	TRUE	TRUE	Significant Outside Threshold	significant-enAllele	rs7362224_C
4	111865158	111865328	rs7439117	Alt	T	0.64	43.1847	41.8389	0.0457974	1.40231	0.026135	TRUE	TRUE	Significant Outside Threshold	significant-enAllele	rs7439117_T
3	13289037	13289207	rs749573	Alt	A	0.63	80.9227	78.9426	0.0326792	1.50219	0.00266782	TRUE	TRUE	Significant Outside Threshold	significant-enAllele	rs749573_A
6	30922707	30922877	rs753726	Alt	A	0.6	33.9516	32.7935	0.0490064	1.33368	0.00619009	TRUE	TRUE	Significant Outside Threshold	significant-enAllele	rs753726_A
1	42007903	42008073	rs7546128	Alt	T	0.61	33.7483	32.5946	0.0500543	1.91761	0.0150349	TRUE	TRUE	Significant Outside Threshold	significant-enAllele	rs7546128_T
5	56747060	56747230	rs76250845	Alt	T	0.62	35.6228	34.4334	0.049348	1.65487	0.00081562	TRUE	TRUE	Significant Outside Threshold	significant-enAllele	rs76250845_T
4	77890776	77890946	rs7661064	Alt	G	0.68	53.4175	51.8717	0.043771	1.48193	0.00113524	TRUE	TRUE	Significant Outside Threshold	significant-enAllele	rs7661064_G
17	46968917	46969087	rs76774446	Alt	G	0.59	37.0102	35.7899	0.0462995	1.70202	0.00665261	TRUE	TRUE	Significant Outside Threshold	significant-enAllele	rs76774446_G
4	14101271	14101441	rs7681198	Alt	G	0.63	30.8877	29.7878	0.0537096	1.65337	0.0215001	TRUE	TRUE	Significant Outside Threshold	significant-enAllele	rs7681198_G
4	77871508	77871678	rs7689226	Alt	C	0.7	66.3926	64.625	0.0405889	1.72088	0.0107491	TRUE	TRUE	Significant Outside Threshold	significant-enAllele	rs7689226_C
6	158313973	158314143	rs7756620	Alt	C	1.54	12.8871	12.2455	0.207762	2.51663	0.0281348	TRUE	TRUE	Significant Outside Threshold	significant-enAllele	rs7756620_C
7	93541873	93542043	rs7809367	Alt	G	0.67	25.4347	24.4449	0.0628562	1.68481	0.0062641	TRUE	TRUE	Significant Outside Threshold	significant-enAllele	rs7809367_G
2	157971643	157971813	rs78308467	Alt	A	1.21	140.494	137.756	0.0479014	1.42398	0.0179575	TRUE	TRUE	Significant Outside Threshold	significant-enAllele	rs78308467_A
9	131059454	131059624	rs7856365	Alt	C	0.76	45.1456	43.7602	0.0535871	0.734459	0.00993817	TRUE	TRUE	Significant Outside Threshold	significant-enAllele	rs7856365_C
11	63085059	63085229	rs7941102	Alt	G	0.79	47.4517	46.0235	0.0539449	1.80034	0.00610424	TRUE	TRUE	Significant Outside Threshold	significant-enAllele	rs7941102_G
16	87154860	87155030	rs8048835	Alt	T	0.89	26.3105	25.3021	0.0829817	1.33057	0.0379948	TRUE	TRUE	Significant Outside Threshold	significant-enAllele	rs8048835_T
12	86202467	86202637	rs839154	Alt	G	1.03	85.6557	83.6097	0.0521023	1.43154	0.000277292	TRUE	TRUE	Significant Outside Threshold	significant-enAllele	rs839154_G
12	86193767	86193937	rs839164	Alt	G	0.68	47.4811	46.0521	0.0464719	1.25117	0.00724056	TRUE	TRUE	Significant Outside Threshold	significant-enAllele	rs839164_G
5	43041560	43041730	rs867255805	Alt	A	0.7	61.0488	59.3683	0.0423747	1.55324	0.0124895	TRUE	TRUE	Significant Outside Threshold	significant-enAllele	rs867255805_A
1	204894093	204894263	rs911988	Alt	C	0.68	51.0809	49.577	0.0446053	1.39285	0.0101933	TRUE	TRUE	Significant Outside Threshold	significant-enAllele	rs911988_C
6	30918153	30918323	rs9262291	Alt	G	0.64	85.2195	83.1802	0.0324685	1.41769	0.000367229	TRUE	TRUE	Significant Outside Threshold	significant-enAllele	rs9262291_G
6	30918488	30918658	rs9262293	Alt	G	0.59	35.6822	34.4908	0.0464887	1.46092	0.0120081	TRUE	TRUE	Significant Outside Threshold	significant-enAllele	rs9262293_G
6	30869593	30869763	rs9278787	Alt	A	0.89	122.949	120.439	0.0374196	1.29422	0.00221461	TRUE	TRUE	Significant Outside Threshold	significant-enAllele	rs9278787_A
6	30923844	30924014	rs9281079	Alt	CCA	0.65	56.5377	54.9371	0.0408794	1.31315	0.00660582	TRUE	TRUE	Significant Outside Threshold	significant-enAllele	rs9281079_CCA
6	30923844	30924014	rs9281079	Alt	CCT	0.8	109.838	107.463	0.0359925	1.45921	0.00419873	TRUE	TRUE	Significant Outside Threshold	significant-enAllele	rs9281079_CCT
6	49516848	49517018	rs9395502	Alt	A	2.44	56.7903	55.1848	0.152811	1.3856	0.0101624	TRUE	TRUE	Significant Outside Threshold	significant-enAllele	rs9395502_A
10	20982139	20982309	rs960941	Alt	G	1.24	13.9016	13.2228	0.161276	2.21581	0.0178587	TRUE	TRUE	Significant Outside Threshold	significant-enAllele	rs960941_G
11	63140003	63140173	rs9665839	Alt	C	0.7	25.0258	24.0466	0.0665391	2.06282	0.0153621	TRUE	TRUE	Significant Outside Threshold	significant-enAllele	rs9665839_C
3	13293054	13293224	rs9871245	Alt	G	0.59	25.2198	24.2365	0.0559828	1.36695	0.0137501	TRUE	TRUE	Significant Outside Threshold	significant-enAllele	rs9871245_G

## Sheet: MPRA allelic fold change
chr	start	stop	rsID	refseq	allele	log2fc	log10pval	log10fdr	lfc.se	allelic_fold_change	p_value
12	121228370	121228540	rs1000013156	Alt	A	0.63	8.48062	8.0002	0.105944	0.83	0.210544
12	121228370	121228540	rs1000013156	Ref	G	0.9	47.54	46.1102	0.061837	1
4	56993341	56993511	rs10002090	Alt	C	-0.11	1.54579	1.39908	0.0517671	0.95	0.371524
4	56993341	56993511	rs10002090	Ref	T	-0.03	0.271509	0.234219	0.0516998	1
1	15078908	15079078	rs1000313	Alt	C	0.2	9.23291	8.72251	0.0329222	1.21	0.0122196
1	15078908	15079078	rs1000313	Alt	G	-0.02	0.310672	0.268164	0.0322457	1.04	0.0505472
1	15078908	15079078	rs1000313	Alt	T	0	0.029998	0.0249645	0.0323548	1.05	0.288303
1	15078908	15079078	rs1000313	Ref	A	-0.07	1.15885	1.04069	0.0403553	1
5	104604264	104604434	rs1000613	Alt	T	0.11	3.05752	2.81949	0.0337458	1.36	0.00140303
5	104604264	104604434	rs1000613	Ref	C	-0.33	19.3194	18.4823	0.0364149	1
4	4630966	4631136	rs10008114	Alt	T	0.24	3.85146	3.56925	0.0621265	1.39	0.0211858
4	4630966	4631136	rs10008114	Ref	C	-0.23	4.60069	4.28589	0.0554764	1
4	111876359	111876529	rs10008529	Alt	T	-0.34	15.2169	14.4952	0.0423165	0.9	0.0231882
4	111876359	111876529	rs10008529	Ref	C	-0.19	6.17649	5.78777	0.0380597	1
4	111846312	111846482	rs10008693	Alt	A	0.47	45.8718	44.4721	0.0329893	1.25	0.00858611
4	111846312	111846482	rs10008693	Ref	G	0.15	5.76824	5.39701	0.0306369	1
4	167924313	167924483	rs10008707	Alt	G	-0.09	1.73705	1.57651	0.0393418	0.74	0.0535835
4	167924313	167924483	rs10008707	Alt	T	-0.09	1.57824	1.42903	0.0410271	0.74	0.0684157
4	167924313	167924483	rs10008707	Ref	A	0.34	13.5044	12.8384	0.0452801	1
4	167924188	167924358	rs10008811	Alt	A	-0.38	15.7532	15.0129	0.0456306	0.99	0.597811
4	167924188	167924358	rs10008811	Alt	C	-0.33	13.3252	12.6671	0.0435179	1.03	0.770857
4	167924188	167924358	rs10008811	Ref	T	-0.36	16.0833	15.3321	0.0438088	1
4	4635374	4635544	rs10012393	Alt	A	0.35	11.6966	11.096	0.0502041	0.97	0.570071
4	4635374	4635544	rs10012393	Alt	C	0.45	44.9841	43.6016	0.0316825	1.04	0.350599
4	4635374	4635544	rs10012393	Ref	G	0.4	19.7276	18.8792	0.0426461	1
4	4630679	4630849	rs10013623	Alt	A	-0.09	2.2305	2.03809	0.0326693	0.95	0.307913
4	4630679	4630849	rs10013623	Ref	G	-0.02	0.209396	0.179753	0.0355188	1
4	167917360	167917530	rs10019912	Alt	T	0.29	8.39796	7.92147	0.0498297	1.2	0.0185197
4	167917360	167917530	rs10019912	Ref	C	0.02	0.129464	0.110024	0.0759317	1
4	167917571	167917741	rs10020098	Alt	A	0.13	3.72355	3.44921	0.0348299	1.19	0.0162297
4	167917571	167917741	rs10020098	Alt	G	-0.24	7.86836	7.41128	0.0425229	0.92	0.0540202
4	167917571	167917741	rs10020098	Alt	T	0.07	0.977116	0.87299	0.0435467	1.14	0.022345
4	167917571	167917741	rs10020098	Ref	C	-0.12	2.93316	2.7022	0.0373812	1
4	4633560	4633730	rs10022279	Alt	C	-0.03	0.247384	0.213143	0.0550036	1.27	0.0485298
4	4633560	4633730	rs10022279	Ref	T	-0.38	15.3667	14.6406	0.0468807	1
4	57018087	57018257	rs10023009	Alt	C	0.57	36.8459	35.6296	0.0446941	1.63	0.00617787
4	57018087	57018257	rs10023009	Ref	G	-0.13	3.29038	3.03933	0.0386016	1
4	175012490	175012660	rs10024868	Alt	C	-0.12	2.55896	2.348	0.0410869	1.05	0.218603
4	175012490	175012660	rs10024868	Ref	T	-0.2	5.47002	5.1136	0.0425434	1
4	111869313	111869483	rs10025409	Alt	G	0.2	8.87472	8.37582	0.0332661	1.39	0.00794504
4	111869313	111869483	rs10025409	Ref	A	-0.28	14.5283	13.8305	0.0352586	1
4	4630740	4630910	rs10026856	Alt	T	0.19	7.91492	7.45564	0.034054	1.02	0.414752
4	4630740	4630910	rs10026856	Ref	A	0.16	6.89879	6.48024	0.0310981	1
4	56991520	56991690	rs10026915	Alt	A	0.04	0.64425	0.567443	0.0342185	0.8	0.00615164
4	56991520	56991690	rs10026915	Ref	C	0.37	13.9002	13.2216	0.0482364	1
4	4675582	4675752	rs10027314	Alt	C	0.02	0.138306	0.117588	0.0434401	0.73	0.0670186
4	4675582	4675752	rs10027314	Ref	G	0.47	18.7544	17.9337	0.0515394	1
4	111876190	111876360	rs10030566	Alt	T	-0.3	3.32655	3.07361	0.0856468	0.69	0.0187562
4	111876190	111876360	rs10030566	Ref	A	0.23	2.36603	2.16618	0.0794192	1
4	4636969	4637139	rs10031449	Alt	C	4.28	36.9664	35.7481	0.333677	0.99	0.945495
4	4636969	4637139	rs10031449	Alt	T	4.41	37.8477	36.6119	0.339281	1.08	0.0698668
4	4636969	4637139	rs10031449	Ref	A	4.29	37.088	35.8662	0.333918	1
4	56996880	56997050	rs10034395	Alt	A	0.34	14.9186	14.2061	0.0427841	1.18	0.010968
4	56996880	56997050	rs10034395	Ref	G	0.1	2.81905	2.59382	0.0319843	1
5	104462091	104462261	rs10035536	Alt	A	0.06	0.794744	0.705262	0.0414618	1.22	0.0357808
5	104462091	104462261	rs10035536	Ref	C	-0.23	8.62627	8.13924	0.0377825	1
5	104687370	104687540	rs10035851	Alt	T	0.19	1.89046	1.71983	0.0769711	1.1	0.360661
5	104687370	104687540	rs10035851	Ref	C	0.05	0.28789	0.248501	0.0775525	1
5	104455973	104456143	rs10037808	Alt	G	-0.11	2.52525	2.31587	0.0372927	0.75	0.0144372
5	104455973	104456143	rs10037808	Ref	A	0.31	9.32192	8.80685	0.0498425	1
5	115554930	115555100	rs10038493	Alt	A	-0.1	1.36124	1.22796	0.0477559	1.02	0.718696
5	115554930	115555100	rs10038493	Alt	C	-0.01	0.0729655	0.0611246	0.038657	1.09	0.0952058
5	115554930	115555100	rs10038493	Ref	G	-0.13	2.94656	2.71487	0.0386582	1
5	23413077	23413247	rs10040387	Alt	A	-0.09	2.03072	1.85109	0.0363802	1.01	0.602736
5	23413077	23413247	rs10040387	Ref	C	-0.11	2.90007	2.67067	0.0353349	1
5	23296600	23296770	rs10041167	Alt	T	-0.33	10.9237	10.3503	0.0491852	0.89	0.214293
5	23296600	23296770	rs10041167	Ref	G	-0.17	2.74309	2.52245	0.0546429	1
5	43069813	43069983	rs10041654	Alt	A	-0.06	1.03653	0.927729	0.0374177	0.85	0.000517118
5	43069813	43069983	rs10041654	Alt	T	0.22	6.73932	6.32657	0.0428109	1.04	0.419987
5	43069813	43069983	rs10041654	Ref	G	0.17	5.38965	5.03635	0.0364342	1
5	115518903	115519073	rs10041776	Alt	T	-0.17	2.94165	2.71017	0.0514674	0.78	0.0108881
5	115518903	115519073	rs10041776	Ref	C	0.2	2.65402	2.43822	0.0649175	1
5	115583677	115583847	rs10043094	Alt	C	-0.25	12.8797	12.2386	0.0342029	0.98	0.772614
5	115583677	115583847	rs10043094	Alt	G	-0.13	4.15923	3.86312	0.0330903	1.07	0.0979105
5	115583677	115583847	rs10043094	Ref	A	-0.22	4.96061	4.62702	0.0507867	1
5	104749248	104749418	rs10043901	Alt	C	-0.1	0.437386	0.381481	0.110649	1.03	0.782173
5	104749248	104749418	rs10043901	Ref	T	-0.14	0.731822	0.647187	0.104416	1
5	104642360	104642530	rs10046033	Alt	T	0.03	0.385564	0.335246	0.0363894	0.85	0.032309
5	104642360	104642530	rs10046033	Ref	A	0.27	14.9127	14.2005	0.0339695	1
5	23371326	23371496	rs10050789	Alt	G	0.26	3.64386	3.37346	0.0716159	0.97	0.977581
5	23371326	23371496	rs10050789	Ref	C	0.31	5.9899	5.60939	0.0642326	1
5	23371446	23371616	rs10050856	Alt	T	0.21	6.31783	5.92256	0.0407392	1.08	0.116369
5	23371446	23371616	rs10050856	Ref	C	0.09	1.81499	1.64953	0.0381725	1
5	23331252	23331422	rs10051288	Alt	A	0.5	18.2322	17.4253	0.0566268	1.36	0.0132001
5	23331252	23331422	rs10051288	Alt	T	0.06	0.887249	0.789896	0.0378064	1	0.928124
5	23331252	23331422	rs10051288	Ref	C	0.06	0.651175	0.573894	0.0475357	1
5	43048118	43048288	rs10051990	Alt	G	-0.18	7.14735	6.71853	0.0328658	0.97	0.181987
5	43048118	43048288	rs10051990	Ref	T	-0.13	3.9938	3.70528	0.0331561	1
5	104582814	104582984	rs10052188	Alt	A	0.11	1.47377	1.33233	0.0506209	1.19	0.0394058
5	104582814	104582984	rs10052188	Alt	G	-0.08	0.533693	0.46709	0.0766732	1.05	0.516398
5	104582814	104582984	rs10052188	Ref	T	-0.14	2.81564	2.59056	0.04565	1
5	43052349	43052519	rs10052644	Alt	A	0.09	1.35778	1.22479	0.0454941	0.81	0.0434905
5	43052349	43052519	rs10052644	Alt	G	0.04	0.631189	0.5554	0.0374869	0.79	0.0280909
5	43052349	43052519	rs10052644	Alt	T	0.28	5.90613	5.52949	0.0572041	0.92	0.117205
5	43052349	43052519	rs10052644	Ref	C	0.39	14.7562	14.0503	0.0493757	1
5	104584036	104584206	rs10052804	Alt	C	0.1	2.48835	2.28094	0.0333634	1.01	0.866927
5	104584036	104584206	rs10052804	Alt	T	0.7	3.06937	2.83098	0.210582	1.53	0.0891061
5	104584036	104584206	rs10052804	Ref	A	0.09	1.40356	1.26695	0.0441595	1
5	104578972	104579142	rs10053368	Alt	G	0.06	0.987521	0.882191	0.0384616	1.09	0.0923432
5	104578972	104579142	rs10053368	Ref	A	-0.06	0.709479	0.626842	0.0468146	1
5	104579000	104579170	rs10053371	Alt	T	-0.07	0.636063	0.559874	0.0543831	0.81	0.0583742
5	104579000	104579170	rs10053371	Ref	A	0.24	5.37327	5.02093	0.0512869	1
5	115541762	115541932	rs10053572	Alt	A	0.17	3.88819	3.60409	0.0442162	1.04	0.0624143
5	115541762	115541932	rs10053572	Alt	C	0.43	35.3316	34.1487	0.0341143	1.25	0.0276866
5	115541762	115541932	rs10053572	Ref	G	0.11	2.55383	2.34322	0.0357514	1
5	23327762	23327932	rs10053901	Alt	A	0.19	3.65836	3.38733	0.0515627	0.79	0.0207622
5	23327762	23327932	rs10053901	Alt	C	0.14	1.85702	1.68864	0.0573658	0.76	0.0108682
5	23327762	23327932	rs10053901	Alt	G	0.4	20.4827	19.6161	0.0426748	0.91	0.0652212
5	23327762	23327932	rs10053901	Ref	T	0.53	31.8535	30.7372	0.0448904	1
5	23327591	23327761	rs10054173	Alt	A	0.11	2.2656	2.07142	0.0390269	1.05	0.129254
5	23327591	23327761	rs10054173	Alt	T	0.33	11.4959	10.9029	0.0467838	1.22	0.00146095
5	23327591	23327761	rs10054173	Ref	C	0.03	0.377035	0.327641	0.0412594	1
5	43052729	43052899	rs10054331	Alt	T	0.16	3.58919	3.32168	0.0430316	0.93	0.154091
5	43052729	43052899	rs10054331	Ref	C	0.26	8.69968	8.20851	0.0428672	1
5	104579050	104579220	rs10054977	Alt	G	0.12	1.69151	1.53414	0.0502835	0.74	0.00201126
5	104579050	104579220	rs10054977	Ref	T	0.55	40.1071	38.8248	0.0413989	1
10	114301703	114301873	rs1005633	Alt	A	0.34	8.31986	7.84593	0.0581862	1.41	0.0520713
10	114301703	114301873	rs1005633	Ref	C	-0.15	3.09559	2.85556	0.0450624	1
5	43084224	43084394	rs10056822	Alt	A	-0.23	7.6913	7.24141	0.0402111	1.05	0.368276
5	43084224	43084394	rs10056822	Ref	G	-0.29	13.877	13.1997	0.0378453	1
5	42984038	42984208	rs10057416	Alt	A	0.29	14.9228	14.2101	0.0363611	1.09	0.107626
5	42984038	42984208	rs10057416	Alt	C	0.13	3.4634	3.20292	0.0358889	0.98	0.294061
5	42984038	42984208	rs10057416	Ref	G	0.16	6.62721	6.21949	0.0311105	1
5	104582913	104583083	rs10057459	Alt	A	-0.08	1.36931	1.23553	0.0383392	1.05	0.00356486
5	104582913	104583083	rs10057459	Alt	C	-0.41	16.475	15.7137	0.0484575	0.84	0.0529015
5	104582913	104583083	rs10057459	Ref	G	-0.15	3.00455	2.76978	0.0451669	1
5	104582963	104583133	rs10057469	Alt	T	0.45	22.1255	21.2138	0.0458445	1.35	0.00509347
5	104582963	104583133	rs10057469	Ref	G	0.02	0.167227	0.142845	0.0501039	1
5	23327789	23327959	rs10059171	Alt	A	-0.06	0.584126	0.512568	0.0574092	0.97	0.326729
5	23327789	23327959	rs10059171	Ref	G	-0.01	0.0813589	0.0683495	0.0649339	1
5	104584054	104584224	rs10059643	Alt	A	0.26	10.0922	9.54808	0.0397704	1.03	0.555066
5	104584054	104584224	rs10059643	Ref	G	0.22	9.32866	8.81309	0.0349522	1
5	104578480	104578650	rs10059898	Alt	A	0.48	27.6302	26.5972	0.0439137	1.03	0.385175
5	104578480	104578650	rs10059898	Ref	G	0.44	20.609	19.7392	0.0465834	1
5	104602058	104602228	rs10060837	Alt	A	0.09	1.02883	0.920413	0.0519488	1.27	0.0284948
5	104602058	104602228	rs10060837	Ref	C	-0.26	5.44019	5.08502	0.0557788	1
5	23371775	23371945	rs10061895	Alt	A	0.16	6.61857	6.21163	0.031596	0.97	0.245663
5	23371775	23371945	rs10061895	Alt	C	0.34	14.6234	13.9216	0.0430152	1.1	0.298526
5	23371775	23371945	rs10061895	Ref	T	0.21	9.13053	8.62436	0.0340279	1
5	104702461	104702631	rs10061912	Alt	G	-0.06	0.862129	0.767289	0.0373438	0.98	0.28669
5	104702461	104702631	rs10061912	Alt	T	-0.12	1.57515	1.4262	0.0524313	0.94	0.243599
5	104702461	104702631	rs10061912	Ref	C	-0.03	0.424792	0.370343	0.0380132	1
5	42921923	42922093	rs10063717	Alt	A	-0.05	0.655567	0.577994	0.0399747	1.2	0.0177763
5	42921923	42922093	rs10063717	Alt	C	-0.09	1.85001	1.68208	0.0382951	1.16	0.0197368
5	42921923	42922093	rs10063717	Ref	G	-0.31	11.7413	11.1389	0.044384	1
5	42987657	42987827	rs10064089	Alt	A	-0.19	4.73754	4.41563	0.0452865	0.95	0.213611
5	42987657	42987827	rs10064089	Alt	T	-0.15	3.62309	3.35349	0.0405242	0.98	0.635107
5	42987657	42987827	rs10064089	Ref	C	-0.12	2.06668	1.88418	0.0444028	1
5	43098353	43098523	rs10064210	Alt	A	0.63	4.37792	4.07278	0.152752	1.03	0.472582
5	43098353	43098523	rs10064210	Ref	G	0.59	5.47543	5.11867	0.126244	1
5	104563904	104564074	rs10064425	Alt	C	-0.01	0.0846456	0.0713216	0.0356649	1.11	0.0172371
5	104563904	104564074	rs10064425	Ref	T	-0.16	3.83278	3.55184	0.0425842	1
5	23388663	23388833	rs10064607	Alt	A	-0.25	10.6701	10.1058	0.0370114	0.89	0.0501125
5	23388663	23388833	rs10064607	Ref	C	-0.08	1.65446	1.49993	0.0346312	1
5	104564689	104564859	rs10064760	Alt	G	-0.32	10.1696	9.62304	0.0486795	0.83	0.0161078
5	104564689	104564859	rs10064760	Ref	A	-0.04	0.313136	0.270421	0.0641683	1
5	104709363	104709533	rs10065491	Alt	A	-0.27	13.2015	12.5481	0.0357766	0.82	0.034573
5	104709363	104709533	rs10065491	Alt	T	0.17	4.81968	4.49411	0.0401032	1.11	0.223473
5	104709363	104709533	rs10065491	Ref	C	0.02	0.295053	0.254794	0.0351941	1
5	104700935	104701105	rs10065718	Alt	T	0.04	0.400702	0.348874	0.0435655	1.01	0.799633
5	104700935	104701105	rs10065718	Ref	A	0.02	0.253185	0.218151	0.0391057	1
5	23304578	23304748	rs10067319	Alt	A	-0.28	9.29461	8.78053	0.0455573	0.77	0.0350306
5	23304578	23304748	rs10067319	Alt	C	0.19	6.69468	6.28367	0.03627	1.07	0.135296
5	23304578	23304748	rs10067319	Alt	G	-0.07	1.08875	0.975298	0.0392609	0.9	0.0711348
5	23304578	23304748	rs10067319	Ref	T	0.09	1.40648	1.26975	0.0416287	1
5	104563812	104563982	rs10069663	Alt	A	-0.18	3.53659	3.27184	0.0486935	0.87	0.104567
5	104563812	104563982	rs10069663	Ref	G	0.03	0.347473	0.300976	0.0412545	1
5	23412176	23412346	rs10070516	Alt	G	0.28	19.1217	18.2907	0.0311676	1.17	0.00102995
5	23412176	23412346	rs10070516	Alt	T	0.47	35.646	34.4556	0.0375166	1.34	0.00500783
5	23412176	23412346	rs10070516	Ref	A	0.06	0.910908	0.811565	0.035988	1
2	130845733	130845903	rs1007090128	Alt	T	0.04	0.444427	0.387445	0.0390479	0.97	0.243694
2	130845733	130845903	rs1007090128	Ref	C	0.08	1.70045	1.54251	0.0363461	1
5	104576422	104576592	rs10071115	Alt	A	-0.12	2.32129	2.12414	0.0411739	0.88	0.20034
5	104576422	104576592	rs10071115	Alt	G	-0.05	0.532224	0.465816	0.0480916	0.92	0.305912
5	104576422	104576592	rs10071115	Ref	C	0.07	0.563182	0.493669	0.0605849	1
5	42921742	42921912	rs10071470	Alt	G	0.32	7.28727	6.85283	0.0591733	1.07	0.165322
5	42921742	42921912	rs10071470	Ref	T	0.22	5.43229	5.0774	0.0484289	1
5	42921886	42922056	rs10071534	Alt	C	0.55	55.3314	53.7487	0.0348383	1.51	0.00087066
5	42921886	42922056	rs10071534	Ref	T	-0.05	0.828064	0.735723	0.0331289	1
5	43097932	43098102	rs10071791	Alt	C	0.27	16.2289	15.4736	0.0316775	1.35	0.002974
5	43097932	43098102	rs10071791	Ref	T	-0.17	5.71071	5.34234	0.0353269	1
5	23304530	23304700	rs10072437	Alt	C	0.06	1.04038	0.93126	0.0354957	0.63	0.0113462
5	23304530	23304700	rs10072437	Alt	T	0.13	3.40564	3.14852	0.0368605	0.66	0.00294413
5	23304530	23304700	rs10072437	Ref	G	0.73	91.4979	89.349	0.0356987	1
5	104582442	104582612	rs10072579	Alt	G	0.14	3.40797	3.15057	0.0383888	0.94	0.250636
5	104582442	104582612	rs10072579	Alt	T	0.03	0.272721	0.235331	0.0486266	0.88	0.139203
5	104582442	104582612	rs10072579	Ref	C	0.22	7.85179	7.39584	0.0386326	1
5	104582836	104583006	rs10072849	Alt	T	0.42	14.2714	13.5798	0.0543266	1.37	0.106786
5	104582836	104583006	rs10072849	Ref	C	-0.03	0.274785	0.237163	0.0549089	1
5	115596573	115596743	rs10073505	Alt	A	2.61	16.8204	16.0486	0.305564	0.62	0.0411732
5	115596573	115596743	rs10073505	Alt	C	3.07	43.1935	41.8471	0.220574	0.85	0.117145
5	115596573	115596743	rs10073505	Ref	G	3.3	38.486	37.2348	0.251579	1
5	104579422	104579592	rs10073929	Alt	C	0.18	3.65164	3.38078	0.0475953	0.8	0.0999946
5	104579422	104579592	rs10073929	Alt	G	0.44	23.0818	22.1507	0.0441421	0.96	0.561
5	104579422	104579592	rs10073929	Ref	A	0.5	15.5087	14.7777	0.0610116	1
5	104528669	104528839	rs10075330	Alt	C	-0.05	0.821091	0.729126	0.033715	0.87	0.00976316
5	104528669	104528839	rs10075330	Ref	T	0.15	5.05554	4.71712	0.034393	1
5	104675572	104675742	rs10076011	Alt	G	-0.29	13.9863	13.3049	0.0379604	0.89	0.00169094
5	104675572	104675742	rs10076011	Ref	A	-0.13	2.91519	2.68538	0.038798	1
5	104673182	104673352	rs10076839	Alt	A	0.15	2.46199	2.25636	0.0499569	1.16	0.0180724
5	104673182	104673352	rs10076839	Ref	G	-0.06	0.556919	0.488229	0.0576598	1
5	43034102	43034272	rs10077219	Alt	A	-0.18	2.23411	2.04146	0.0658437	1.02	0.817468
5	43034102	43034272	rs10077219	Ref	G	-0.21	2.71336	2.49418	0.0691767	1
5	104576533	104576703	rs10078807	Alt	G	-0.11	1.97551	1.79956	0.041428	0.86	0.013079
5	104576533	104576703	rs10078807	Alt	T	-0.12	2.1835	1.99392	0.0435218	0.85	0.0170634
5	104576533	104576703	rs10078807	Ref	A	0.12	3.07957	2.8407	0.0353907	1
5	104576798	104576968	rs10078969	Alt	C	0.34	14.1626	13.4752	0.0440177	1.22	0.0959203
5	104576798	104576968	rs10078969	Alt	G	0.01	0.138036	0.117405	0.0364134	0.97	0.446386
5	104576798	104576968	rs10078969	Ref	A	0.05	0.958536	0.855805	0.0329549	1
5	115604418	115604588	rs10079000	Alt	A	-0.15	3.71746	3.44352	0.0412707	1	0.918047
5	115604418	115604588	rs10079000	Alt	G	0.11	3.11537	2.87385	0.0320419	1.2	0.000100339
5	115604418	115604588	rs10079000	Ref	C	-0.16	5.22244	4.87678	0.0345948	1
6	158298179	158298349	rs10080516	Alt	C	0.17	5.59034	5.22729	0.0351261	0.93	0.0382255
6	158298179	158298349	rs10080516	Alt	G	-0.25	8.11361	7.64635	0.0430131	0.7	0.000464151
6	158298179	158298349	rs10080516	Alt	T	-0.16	3.56435	3.29837	0.0446469	0.74	0.0127624
6	158298179	158298349	rs10080516	Ref	A	0.26	12.353	11.729	0.0364378	1
10	8615046	8615216	rs1009274	Alt	T	0.08	1.75946	1.59746	0.035637	1.28	0.00486262
10	8615046	8615216	rs1009274	Ref	A	-0.27	11.2136	10.6289	0.0386814	1
8	105514156	105514326	rs10093297	Alt	A	0.54	33.3479	32.2011	0.0444481	1.18	0.00197203
8	105514156	105514326	rs10093297	Alt	C	0.62	69.4278	67.617	0.0351209	1.24	0.0151773
8	105514156	105514326	rs10093297	Ref	T	0.31	9.76635	9.23353	0.0479721	1
8	105508778	105508948	rs10094054	Alt	A	0.07	0.884964	0.78784	0.048331	1	0.766375
8	105508778	105508948	rs10094054	Ref	T	0.07	1.19293	1.07233	0.0358223	1
8	105510872	105511042	rs10094510	Alt	A	-0.42	22.9014	21.9755	0.0422255	0.75	0.0148159
8	105510872	105511042	rs10094510	Alt	T	-0.31	13.3118	12.654	0.0413461	0.81	0.00707345
8	105510872	105511042	rs10094510	Ref	G	0	0.0470973	0.0393885	0.0324951	1
6	30865739	30865909	rs1010160250	Alt	A	-0.16	2.06629	1.88388	0.0625034	0.78	0.0437432
6	30865739	30865909	rs1010160250	Ref	T	0.19	5.5228	5.16365	0.0411431	1
10	114281433	114281603	rs1010462	Alt	A	-0.1	2.0654	1.88317	0.0390415	1.05	0.147558
10	114281433	114281603	rs1010462	Alt	C	-0.18	5.909	5.53221	0.0360994	1	0.930106
10	114281433	114281603	rs1010462	Alt	T	-0.29	12.135	11.5178	0.0401635	0.93	0.0420836
10	114281433	114281603	rs1010462	Ref	G	-0.18	6.62888	6.22093	0.0343285	1
8	105513548	105513718	rs10105733	Alt	G	0.12	2.39025	2.189	0.0420446	1.18	0.00766502
8	105513548	105513718	rs10105733	Alt	T	0.11	2.72561	2.50588	0.0361969	1.17	0.0125124
8	105513548	105513718	rs10105733	Ref	A	-0.12	2.22988	2.03752	0.0418847	1
4	77936022	77936192	rs1010728	Alt	A	0.13	2.31381	2.11719	0.0452638	1.11	0.256859
4	77936022	77936192	rs1010728	Ref	G	-0.03	0.153111	0.130436	0.0702452	1
9	11846573	11846743	rs10117546	Alt	A	0	0.0265898	0.0222965	0.0328832	0.86	0.0239003
9	11846573	11846743	rs10117546	Alt	T	0.09	2.06641	1.88395	0.0358991	0.92	0.0872155
9	11846573	11846743	rs10117546	Ref	G	0.21	6.33869	5.94259	0.0410354	1
17	47601016	47601186	rs1012287901	Alt	A	0	0.0266645	0.0223404	0.0575737	1.09	0.348973
17	47601016	47601186	rs1012287901	Ref	G	-0.12	2.80674	2.58207	0.038495	1
14	40916340	40916510	rs10129178	Alt	A	0.31	10.7536	10.1868	0.045693	1.17	0.0924721
14	40916340	40916510	rs10129178	Alt	G	-0.01	0.0744888	0.0625158	0.0547741	0.94	0.422424
14	40916340	40916510	rs10129178	Alt	T	0.24	5.98155	5.60127	0.0498337	1.12	0.114469
14	40916340	40916510	rs10129178	Ref	C	0.08	1.22865	1.10517	0.0397773	1
14	62695809	62695979	rs10129320	Alt	T	0.19	5.8677	5.49266	0.0398343	0.85	0.00673427
14	62695809	62695979	rs10129320	Ref	C	0.42	38.6765	37.4203	0.0319117	1
14	88062481	88062651	rs10130801	Alt	A	0.33	18.2718	17.4643	0.036721	1.03	0.395936
14	88062481	88062651	rs10130801	Alt	C	0.19	7.65646	7.20768	0.034601	0.94	0.102051
14	88062481	88062651	rs10130801	Ref	T	0.28	13.5664	12.8987	0.0372189	1
14	40881818	40881988	rs10131782	Alt	T	0.42	11.554	10.9587	0.06016	1.34	0.0632247
14	40881818	40881988	rs10131782	Ref	C	0	0.0299399	0.0249372	0.0337306	1
14	77269365	77269535	rs10133981	Alt	T	-0.28	14.2123	13.5237	0.0353784	0.92	0.224995
14	77269365	77269535	rs10133981	Ref	G	-0.16	3.09404	2.85422	0.0478299	1
14	40914344	40914514	rs10134847	Alt	C	-0.18	8.01619	7.5525	0.0321751	0.82	0.0175789
14	40914344	40914514	rs10134847	Ref	T	0.1	2.10347	1.91864	0.0386476	1
14	40901049	40901219	rs10136405	Alt	A	0.24	12.4872	11.8576	0.03328	1.22	0.0504665
14	40901049	40901219	rs10136405	Alt	G	0.27	13.3198	12.6619	0.0358529	1.24	0.032352
14	40901049	40901219	rs10136405	Ref	C	-0.04	0.449431	0.391651	0.0441632	1
11	60540871	60541041	rs1013789825	Alt	A	0.01	0.0750082	0.0629257	0.050534	1.16	0.207037
11	60540871	60541041	rs1013789825	Ref	C	-0.21	3.82164	3.54146	0.0549306	1
14	40949204	40949374	rs10138748	Alt	A	-0.17	2.88066	2.65245	0.0539537	0.9	0.0837413
14	40949204	40949374	rs10138748	Ref	C	-0.02	0.206339	0.177022	0.0390427	1
14	40916550	40916720	rs10141625	Alt	C	-0.11	1.85772	1.68925	0.0464893	0.94	0.122779
14	40916550	40916720	rs10141625	Ref	T	-0.03	0.298752	0.257689	0.0458707	1
14	40884991	40885161	rs10141814	Alt	A	-0.04	0.489708	0.427581	0.040072	0.94	0.298018
14	40884991	40885161	rs10141814	Ref	C	0.06	0.736619	0.651688	0.0425481	1
14	40885127	40885297	rs10141926	Alt	T	-0.15	2.56872	2.35732	0.0510201	0.79	0.00101655
14	40885127	40885297	rs10141926	Ref	C	0.19	4.51646	4.20524	0.0466627	1
14	77276704	77276874	rs10141995	Alt	G	0.39	31.3145	30.2046	0.0327274	1.12	0.0291383
14	77276704	77276874	rs10141995	Alt	T	0.53	28.4984	27.4476	0.0468223	1.23	0.0166453
14	77276704	77276874	rs10141995	Ref	C	0.23	7.45397	7.01277	0.0410825	1
14	40885336	40885506	rs10142044	Alt	G	-0.18	5.17568	4.83204	0.0404869	0.97	0.409916
14	40885336	40885506	rs10142044	Ref	A	-0.14	3.57933	3.31244	0.0395566	1
14	40968090	40968260	rs10143161	Alt	A	0.12	2.04011	1.85979	0.0478994	1.14	0.00843025
14	40968090	40968260	rs10143161	Ref	G	-0.06	0.841355	0.748182	0.0422144	1
14	77295275	77295445	rs10143655	Alt	T	3.39	37.8052	36.5705	0.260906	0.77	0.00259341
14	77295275	77295445	rs10143655	Ref	C	3.76	45.8227	44.4245	0.262714	1
14	40914507	40914677	rs10145823	Alt	A	0.11	3.10758	2.86674	0.0328585	1.08	0.0203897
14	40914507	40914677	rs10145823	Alt	T	0.06	0.87808	0.781757	0.0405349	1.04	0.0324923
14	40914507	40914677	rs10145823	Ref	C	0	0.0164458	0.0138442	0.0403607	1
14	40891995	40892165	rs10147209	Alt	C	0.07	0.975272	0.871341	0.0435914	0.78	0.0484295
14	40891995	40892165	rs10147209	Alt	G	0.39	15.2684	14.5447	0.0478092	0.98	0.600247
14	40891995	40892165	rs10147209	Alt	T	0.3	12.898	12.2559	0.0409278	0.92	0.00552403
14	40891995	40892165	rs10147209	Ref	A	0.42	21.7382	20.8351	0.0434504	1
14	40883328	40883498	rs10147741	Alt	A	-0.28	8.36405	7.88857	0.0468402	0.65	0.00727917
14	40883328	40883498	rs10147741	Ref	T	0.35	14.3192	13.6268	0.0449573	1
5	42934879	42935049	rs10148207	Alt	G	-0.05	0.774193	0.686432	0.0394663	0.84	0.00541806
5	42934879	42935049	rs10148207	Ref	A	0.19	7.25023	6.81811	0.0349503	1
4	4643561	4643731	rs1014994473	Alt	G	0.29	11.8079	11.2024	0.0414946	1.15	0.0370857
4	4643561	4643731	rs1014994473	Alt	T	0.06	0.706258	0.623989	0.0474517	0.98	0.631213
4	4643561	4643731	rs1014994473	Ref	A	0.09	1.63738	1.48403	0.0393853	1
14	40942612	40942782	rs10151544	Alt	A	-0.02	0.164225	0.140197	0.0475467	0.84	0.0117837
14	40942612	40942782	rs10151544	Alt	C	0.01	0.0516159	0.0431732	0.0379189	0.86	0.100684
14	40942612	40942782	rs10151544	Ref	T	0.23	7.44419	7.00349	0.0419625	1
18	2766690	2766860	rs1015298035	Alt	A	0.08	1.52921	1.38416	0.0364417	0.81	0.0102963
18	2766690	2766860	rs1015298035	Alt	C	-0.32	4.56697	4.25381	0.0752525	0.62	0.00887635
18	2766690	2766860	rs1015298035	Ref	T	0.38	15.6783	14.9404	0.0458919	1
5	115571166	115571336	rs1015812	Alt	A	-0.18	5.36147	5.00967	0.03962	0.94	0.000798336
5	115571166	115571336	rs1015812	Alt	C	0.11	1.30286	1.17387	0.0548845	1.15	0.00440718
5	115571166	115571336	rs1015812	Alt	T	0.13	2.35202	2.15309	0.0441962	1.17	0.0954338
5	115571166	115571336	rs1015812	Ref	G	-0.1	1.99608	1.81866	0.0381517	1
2	29645666	29645836	rs10164430	Alt	T	-0.08	1.88452	1.71447	0.0315044	1.04	0.231878
2	29645666	29645836	rs10164430	Ref	C	-0.13	4.41064	4.1039	0.0315311	1
2	4861388	4861558	rs10164527	Alt	A	0.16	3.82079	3.54073	0.0418371	1.29	0.0259838
2	4861388	4861558	rs10164527	Alt	C	0.09	0.683545	0.60341	0.0687234	1.23	0.101033
2	4861388	4861558	rs10164527	Alt	T	-0.04	0.709342	0.626742	0.0340871	1.12	0.0111856
2	4861388	4861558	rs10164527	Ref	G	-0.21	6.78592	6.37183	0.0394181	1
2	4861477	4861647	rs10164620	Alt	A	0.15	4.7536	4.43099	0.0343227	1.03	0.148893
2	4861477	4861647	rs10164620	Alt	C	-0.07	1.08025	0.967663	0.037619	0.89	0.00406473
2	4861477	4861647	rs10164620	Ref	G	0.1	2.14992	1.96247	0.0363405	1
2	157954433	157954603	rs10167048	Alt	A	0.16	3.07631	2.83766	0.0470855	1	0.897953
2	157954433	157954603	rs10167048	Alt	C	0.05	0.881716	0.785088	0.0354958	0.93	0.355631
2	157954433	157954603	rs10167048	Ref	T	0.16	2.66377	2.44721	0.0532802	1
2	157950211	157950381	rs10168705	Alt	G	-0.22	4.83976	4.51244	0.0504982	0.91	0.267364
2	157950211	157950381	rs10168705	Ref	A	-0.08	0.777144	0.689047	0.0561836	1
2	23487268	23487438	rs10169305	Alt	A	0.42	36.6242	35.4114	0.0325724	1.18	0.00789185
2	23487268	23487438	rs10169305	Ref	G	0.17	7.28125	6.8474	0.0316999	1
2	217712134	217712304	rs10170591	Alt	C	-0.2	6.99587	6.5737	0.0375565	0.81	0.0199701
2	217712134	217712304	rs10170591	Ref	T	0.11	3.4406	3.18174	0.0311721	1
2	157972766	157972936	rs10170886	Alt	A	0.07	1.34695	1.21458	0.035782	1.02	0.764386
2	157972766	157972936	rs10170886	Ref	G	0.04	0.351185	0.304552	0.0509321	1
2	157956291	157956461	rs10171199	Alt	G	-0.18	3.58856	3.32111	0.049918	1.11	0.0356961
2	157956291	157956461	rs10171199	Ref	A	-0.33	9.63601	9.10909	0.0523282	1
2	4851981	4852151	rs10173216	Alt	C	0.4	14.0497	13.3664	0.0514469	1.44	0.0222106
2	4851981	4852151	rs10173216	Ref	T	-0.13	1.64792	1.49409	0.0570472	1
2	4811004	4811174	rs10173724	Alt	A	-0.02	0.346419	0.300058	0.0313804	0.97	0.434997
2	4811004	4811174	rs10173724	Ref	C	0.02	0.201662	0.172912	0.0412786	1
2	4861642	4861812	rs10173912	Alt	T	0.06	0.753699	0.667615	0.0412902	0.92	0.037304
2	4861642	4861812	rs10173912	Ref	C	0.17	5.60613	5.24251	0.036404	1
4	167909876	167910046	rs1017555	Alt	G	0.49	35.5829	34.3944	0.0390185	1.04	0.43956
4	167909876	167910046	rs1017555	Alt	T	-0.07	1.24912	1.12422	0.035736	0.71	0.00328461
4	167909876	167910046	rs1017555	Ref	C	0.43	34.5589	33.392	0.0350038	1
4	167910114	167910284	rs1017556	Alt	A	-0.25	5.13083	4.78961	0.0552932	0.92	0.284055
4	167910114	167910284	rs1017556	Alt	T	-0.32	14.6111	13.9098	0.0409	0.87	0.0854169
4	167910114	167910284	rs1017556	Ref	G	-0.13	2.09484	1.91047	0.047396	1
2	157954626	157954796	rs10175615	Alt	A	0.01	0.0911245	0.0769849	0.0308569	0.92	0.0326228
2	157954626	157954796	rs10175615	Ref	G	0.13	3.24465	2.9967	0.036915	1
2	157926279	157926449	rs10175709	Alt	T	0.43	20.1825	19.3217	0.0453311	0.68	0.0120007
2	157926279	157926449	rs10175709	Ref	G	0.98	57.1605	55.5513	0.0609976	1
2	29661312	29661482	rs10177946	Alt	G	-0.39	8.50236	8.0211	0.0653571	0.77	0.0513976
2	29661312	29661482	rs10177946	Ref	A	0	0.0181299	0.0152826	0.0439333	1
2	29646855	29647025	rs10180203	Alt	G	0.38	16.4508	15.6901	0.0456355	1.42	0.00305995
2	29646855	29647025	rs10180203	Ref	A	-0.12	2.02813	1.84868	0.0465812	1
2	239516754	239516924	rs10181444	Alt	A	-0.01	0.066337	0.055742	0.0418332	0.69	0.00130512
2	239516754	239516924	rs10181444	Alt	C	0.2	9.65058	9.12304	0.0315079	0.79	0.00196088
2	239516754	239516924	rs10181444	Ref	T	0.53	52.8889	51.3537	0.0346268	1
2	29646425	29646595	rs10182321	Alt	A	0.22	9.28469	8.77121	0.0352066	1.29	0.0215284
2	29646425	29646595	rs10182321	Alt	C	0.08	1.87354	1.70395	0.03293	1.17	0.00329702
2	29646425	29646595	rs10182321	Alt	G	0.04	0.697746	0.616068	0.0318666	1.14	0.0248704
2	29646425	29646595	rs10182321	Ref	T	-0.15	3.88248	3.59874	0.0380695	1
2	29647254	29647424	rs10182925	Alt	C	0.58	34.7132	33.5436	0.0467556	1.04	0.404256
2	29647254	29647424	rs10182925	Ref	A	0.53	43.7718	42.4151	0.037626	1
2	131466896	131467066	rs1018601024	Alt	A	-0.33	22.819	21.8954	0.0327623	0.95	0.46057
2	131466896	131467066	rs1018601024	Ref	G	-0.25	8.01546	7.55195	0.0441416	1
2	4861658	4861828	rs10186057	Alt	G	-0.14	3.04853	2.81114	0.042056	0.87	0.00355907
2	4861658	4861828	rs10186057	Alt	T	-0.36	10.0088	9.46794	0.0549337	0.75	0.00958262
2	4861658	4861828	rs10186057	Ref	A	0.05	0.882611	0.785831	0.0358343	1
2	4856872	4857042	rs10187271	Alt	G	-0.06	0.825647	0.733419	0.0434862	0.99	0.827893
2	4856872	4857042	rs10187271	Ref	A	-0.05	0.561801	0.492503	0.0443677	1
2	29646458	29646628	rs10190615	Alt	A	-0.01	0.034	0.0282974	0.055083	0.82	0.0436518
2	29646458	29646628	rs10190615	Alt	C	-0.24	10.0294	9.48774	0.036576	0.7	0.00118276
2	29646458	29646628	rs10190615	Ref	G	0.28	17.5612	16.7728	0.0326361	1
16	86428397	86428567	rs1019112952	Alt	A	-0.22	5.04683	4.70901	0.0494413	0.77	0.00826453
16	86428397	86428567	rs1019112952	Ref	G	0.15	3.5305	3.26625	0.042224	1
2	4857855	4858025	rs10193134	Alt	C	0.09	1.56514	1.41676	0.0412803	1.12	0.0717944
2	4857855	4858025	rs10193134	Ref	T	-0.08	1.16382	1.04522	0.0417796	1
2	23487487	23487657	rs10193850	Alt	T	-0.31	9.90937	9.37163	0.0475398	0.6	0.00324735
2	23487487	23487657	rs10193850	Ref	C	0.42	34.1878	33.0253	0.0340016	1
2	157948246	157948416	rs10197165	Alt	A	0.06	1.08971	0.976098	0.0351949	0.89	0.0113233
2	157948246	157948416	rs10197165	Alt	T	0.3	17.3934	16.6092	0.0343369	1.05	0.131708
2	157948246	157948416	rs10197165	Ref	C	0.23	8.40331	7.92647	0.0394026	1
2	217705502	217705672	rs10199911	Alt	A	0.3	18.8496	18.0251	0.0326712	0.97	0.398114
2	217705502	217705672	rs10199911	Alt	T	-0.01	0.0487739	0.0407976	0.0389622	0.78	0.0016231
2	217705502	217705672	rs10199911	Ref	C	0.35	21.8896	20.982	0.0352666	1
2	153185723	153185893	rs10202249	Alt	A	0.25	11.0132	10.4359	0.0364727	0.96	0.17202
2	153185723	153185893	rs10202249	Alt	C	0.15	4.92608	4.59452	0.0333775	0.89	0.00337023
2	153185723	153185893	rs10202249	Alt	G	0.1	2.77113	2.54841	0.0326344	0.87	0.0898011
2	153185723	153185893	rs10202249	Ref	T	0.31	10.9498	10.3751	0.0451969	1
2	4866667	4866837	rs10202733	Alt	G	1.49	2.96265	2.72976	0.45696	2.92	0.141353
2	4866667	4866837	rs10202733	Alt	T	-0.71	0.400882	0.349019	0.838317	0.63	0.524851
2	4866667	4866837	rs10202733	Ref	A	-0.05	0.0253293	0.0213441	0.727071	1
2	157950314	157950484	rs10203893	Alt	T	0.2	7.10044	6.67349	0.0377191	1.16	0.0541133
2	157950314	157950484	rs10203893	Ref	C	-0.01	0.11117	0.0942845	0.0422483	1
2	4866830	4867000	rs10205337	Alt	A	-0.25	1.21131	1.08937	0.131362	1.15	0.180455
2	4866830	4867000	rs10205337	Ref	T	-0.45	2.4248	2.22122	0.156372	1
2	23487245	23487415	rs10208318	Alt	C	0.15	5.34026	4.98908	0.0322133	0.94	0.0873234
2	23487245	23487415	rs10208318	Ref	T	0.24	11.4549	10.8625	0.0349899	1
2	239516388	239516558	rs10211283	Alt	A	-0.28	10.2614	9.71071	0.0432218	1.02	0.623192
2	239516388	239516558	rs10211283	Ref	G	-0.31	13.0114	12.3646	0.0412809	1
5	23342975	23343145	rs10214049	Alt	A	0	0.0245485	0.0206865	0.0578193	0.97	0.649886
5	23342975	23343145	rs10214049	Alt	T	-0.03	0.358387	0.311176	0.0354438	0.95	0.0236454
5	23342975	23343145	rs10214049	Ref	C	0.05	0.818776	0.727038	0.0355953	1
4	118330858	118331028	rs1022286	Alt	A	-0.1	0.779097	0.690739	0.0699462	1.19	0.121293
4	118330858	118331028	rs1022286	Ref	G	-0.35	6.496	6.09362	0.0689472	1
7	93564044	93564214	rs10238108	Alt	A	-0.07	1.03902	0.930015	0.0425886	0.99	0.741667
7	93564044	93564214	rs10238108	Ref	T	-0.06	0.918703	0.818702	0.0402335	1
7	27260880	27261050	rs10239543	Alt	A	-0.32	18.5395	17.7248	0.0358138	0.71	0.00390828
7	27260880	27261050	rs10239543	Alt	C	-0.24	7.55298	7.10754	0.043635	0.75	0.000892756
7	27260880	27261050	rs10239543	Alt	G	-0.13	3.85343	3.57115	0.0353859	0.81	0.0048482
7	27260880	27261050	rs10239543	Ref	T	0.16	6.92134	6.502	0.0311084	1
7	93555614	93555784	rs10240028	Alt	G	0.07	1.05319	0.943133	0.0422402	0.94	0.046073
7	93555614	93555784	rs10240028	Ref	A	0.16	3.776	3.49873	0.0428518	1
7	66581652	66581822	rs10249404	Alt	A	-0.11	1.3351	1.20352	0.0527264	0.88	0.0719713
7	66581652	66581822	rs10249404	Ref	G	0.07	1.71707	1.55777	0.0312196	1
7	93582257	93582427	rs10253830	Alt	A	-0.26	10.8231	10.2534	0.0380874	0.99	0.791464
7	93582257	93582427	rs10253830	Ref	G	-0.24	7.46344	7.02164	0.0442743	1
7	16930329	16930499	rs10263336	Alt	C	-0.12	2.74713	2.52624	0.039052	0.95	0.0613181
7	16930329	16930499	rs10263336	Ref	G	-0.04	0.668782	0.590003	0.0360903	1
7	16931180	16931350	rs10267274	Alt	C	-0.45	13.352	12.6922	0.0601836	0.87	0.0628524
7	16931180	16931350	rs10267274	Ref	G	-0.25	6.89393	6.47562	0.0476778	1
7	93549312	93549482	rs10270704	Alt	T	0.36	24.2365	23.2766	0.0350086	1.4	0.0173283
7	93549312	93549482	rs10270704	Ref	A	-0.13	2.0222	1.84312	0.0487093	1
7	16924064	16924234	rs10275619	Alt	G	0.27	6.99442	6.57242	0.050859	0.99	0.924573
7	16924064	16924234	rs10275619	Ref	T	0.28	11.8688	11.2619	0.0396983	1
7	16933368	16933538	rs10276006	Alt	T	0.11	2.44916	2.24445	0.0373899	1.17	0.037872
7	16933368	16933538	rs10276006	Ref	G	-0.12	3.23074	2.98343	0.0346841	1
7	16934236	16934406	rs10279956	Alt	A	0.15	3.27927	3.02899	0.0423614	0.7	0.0356211
7	16934236	16934406	rs10279956	Ref	G	0.66	40.7438	39.4497	0.0490554	1
9	12096325	12096495	rs10283652	Alt	A	0.19	7.7717	7.3187	0.0340361	1.32	0.0105291
9	12096325	12096495	rs10283652	Alt	C	-0.21	5.95972	5.58046	0.0425336	1	0.901195
9	12096325	12096495	rs10283652	Ref	G	-0.21	5.57739	5.21505	0.0453444	1
3	13889747	13889917	rs1029322242	Alt	G	0.36	6.68772	6.27694	0.0690554	1.09	0.376948
3	13889747	13889917	rs1029322242	Ref	A	0.23	10.794	10.2255	0.0342408	1
7	16926072	16926242	rs1029580	Alt	T	0.64	72.745	70.8906	0.0352815	1.16	0.203073
7	16926072	16926242	rs1029580	Ref	A	0.42	14.8006	14.0928	0.0530135	1
5	42930302	42930472	rs1031877274	Alt	G	0.7	38.5567	37.3043	0.0530082	0.93	0.0809226
5	42930302	42930472	rs1031877274	Ref	A	0.79	91.5345	89.3813	0.0389261	1
10	53406640	53406810	rs1036045891	Alt	A	-0.04	0.486449	0.424885	0.0367381	0.98	0.0347982
10	53406640	53406810	rs1036045891	Ref	G	-0.01	0.0967518	0.0816938	0.0388828	1
11	128760435	128760605	rs1036672180	Alt	T	0.99	59.749	58.094	0.0601012	2.07	0.00150517
11	128760435	128760605	rs1036672180	Ref	C	-0.06	0.43821	0.382201	0.0665864	1
2	18347441	18347611	rs1038698	Alt	A	0.04	0.384032	0.333885	0.0458177	1.12	0.132982
2	18347441	18347611	rs1038698	Alt	G	0.26	13.5165	12.8503	0.0348469	1.31	0.0165207
2	18347441	18347611	rs1038698	Alt	T	0.13	2.09033	1.90638	0.0499511	1.2	0.111788
2	18347441	18347611	rs1038698	Ref	C	-0.13	1.37663	1.24198	0.0640466	1
4	77937071	77937241	rs1039467	Alt	A	0.17	6.75874	6.34552	0.0331386	1	0.881208
4	77937071	77937241	rs1039467	Alt	T	0.11	2.77412	2.5513	0.0335376	0.96	0.126733
4	77937071	77937241	rs1039467	Ref	G	0.17	3.83626	3.55509	0.0446224	1
6	22682416	22682586	rs1040534	Alt	A	-0.12	1.90285	1.73104	0.0494944	1.19	0.0145743
6	22682416	22682586	rs1040534	Alt	C	-0.2	9.1153	8.60971	0.0324056	1.13	0.0532129
6	22682416	22682586	rs1040534	Alt	G	-0.2	4.6953	4.37537	0.0465989	1.13	0.0669494
6	22682416	22682586	rs1040534	Ref	T	-0.37	11.7374	11.1354	0.0526262	1
4	77922386	77922556	rs10428319	Alt	C	-0.06	1.16167	1.04323	0.031929	0.94	0.140293
4	77922386	77922556	rs10428319	Ref	G	0.03	0.261398	0.22526	0.0418768	1
17	47426635	47426805	rs1042914028	Alt	A	-0.12	1.18123	1.06159	0.0655164	0.27	0.0389839
17	47426635	47426805	rs1042914028	Ref	T	1.74	19.5559	18.7125	0.188954	1
14	40910380	40910550	rs10437999	Alt	C	0.07	1.45986	1.3196	0.0326695	1.18	0.0379775
14	40910380	40910550	rs10437999	Ref	T	-0.17	3.12255	2.8806	0.0497412	1
9	11874684	11874854	rs10448155	Alt	C	-0.09	1.41569	1.27837	0.0452124	0.78	0.00780189
9	11874684	11874854	rs10448155	Alt	G	0.1	1.57965	1.43028	0.0432406	0.88	0.0410042
9	11874684	11874854	rs10448155	Ref	T	0.27	10.2418	9.69211	0.0416122	1
10	44627398	44627568	rs10450453	Alt	C	-0.15	3.21816	2.9715	0.0439907	0.8	0.0158443
10	44627398	44627568	rs10450453	Ref	T	0.17	4.56762	4.2544	0.0393543	1
10	44626979	44627149	rs10450471	Alt	A	0.68	47.7319	46.2971	0.0464441	1.54	0.00852048
10	44626979	44627149	rs10450471	Alt	G	0.3	13.2564	12.6009	0.0405412	1.19	0.0359533
10	44626979	44627149	rs10450471	Alt	T	0.05	0.479721	0.418614	0.0528944	1	0.763822
10	44626979	44627149	rs10450471	Ref	C	0.06	0.628153	0.552836	0.0474244	1
18	2703222	2703392	rs1045135992	Alt	T	-0.16	4.8603	4.53194	0.0372313	1.08	1.50075e-05
18	2703222	2703392	rs1045135992	Ref	C	-0.27	10.2267	9.67761	0.0414027	1
5	104605615	104605785	rs10455065	Alt	A	0.27	11.7307	11.1287	0.0387078	1.1	0.161959
5	104605615	104605785	rs10455065	Alt	C	-0.04	0.520942	0.45567	0.0372004	0.89	0.0273414
5	104605615	104605785	rs10455065	Ref	T	0.14	3.12589	2.88384	0.0405563	1
5	104605629	104605799	rs10455066	Alt	A	0.16	4.58525	4.27146	0.0377222	1.04	0.158408
5	104605629	104605799	rs10455066	Alt	C	0.18	3.50529	3.24227	0.0502496	1.05	0.0629756
5	104605629	104605799	rs10455066	Alt	G	0.04	0.467932	0.408158	0.0378456	0.95	0.0554942
5	104605629	104605799	rs10455066	Ref	T	0.11	2.9789	2.74539	0.0324571	1
10	20973162	20973332	rs1045559093	Alt	T	-0.11	0.458142	0.399347	0.121261	0.91	0.0175429
10	20973162	20973332	rs1045559093	Ref	C	0.02	0.194826	0.167041	0.0430506	1
6	158309133	158309303	rs10455814	Alt	C	-0.16	5.29125	4.94253	0.035444	1.02	0.591426
6	158309133	158309303	rs10455814	Alt	G	-0.05	0.62019	0.545453	0.04186	1.1	0.00606702
6	158309133	158309303	rs10455814	Ref	A	-0.19	5.5105	5.15173	0.0401953	1
6	158309251	158309421	rs10455815	Alt	G	-0.22	8.02816	7.56376	0.0381968	0.91	0.196174
6	158309251	158309421	rs10455815	Alt	T	0.16	4.65506	4.33748	0.0386335	1.18	0.0455639
6	158309251	158309421	rs10455815	Ref	A	-0.08	1.18532	1.06536	0.0428368	1
6	158349394	158349564	rs10455816	Alt	A	0.53	2.93572	2.70451	0.164556	2.2	0.027153
6	158349394	158349564	rs10455816	Alt	C	-0.55	19.2141	18.3799	0.0605124	1.04	0.344311
6	158349394	158349564	rs10455816	Alt	G	-0.05	0.815386	0.724024	0.0321666	1.47	0.00493386
6	158349394	158349564	rs10455816	Ref	T	-0.6	22.8868	21.962	0.0603852	1
6	158349509	158349679	rs10455817	Alt	C	-0.25	8.06642	7.60059	0.0438858	0.97	0.118278
6	158349509	158349679	rs10455817	Alt	G	-0.1	2.40221	2.20038	0.0358789	1.08	0.067252
6	158349509	158349679	rs10455817	Alt	T	-0.08	1.24496	1.12039	0.0407789	1.1	0.0536408
6	158349509	158349679	rs10455817	Ref	A	-0.21	7.73333	7.28198	0.0381025	1
6	158349646	158349816	rs10455819	Alt	C	-0.33	13.2893	12.6328	0.0434743	0.91	0.0292116
6	158349646	158349816	rs10455819	Alt	G	-0.32	17.436	16.6509	0.0364695	0.92	0.142802
6	158349646	158349816	rs10455819	Ref	T	-0.19	5.1801	4.83619	0.0427899	1
5	23336882	23337052	rs10461810	Alt	G	-0.45	24.234	23.2745	0.0439072	0.79	0.00664492
5	23336882	23337052	rs10461810	Alt	T	0.16	3.21602	2.96957	0.0454755	1.21	0.00160915
5	23336882	23337052	rs10461810	Ref	A	-0.12	3.11833	2.87675	0.0358842	1
5	104722914	104723084	rs10464008	Alt	C	-0.12	2.87362	2.64552	0.0366845	0.82	0.00451442
5	104722914	104723084	rs10464008	Alt	G	-0.13	4.12712	3.83281	0.0329393	0.81	0.000465998
5	104722914	104723084	rs10464008	Alt	T	-0.03	0.34764	0.301109	0.0368511	0.87	0.0287986
5	104722914	104723084	rs10464008	Ref	A	0.17	7.31049	6.87556	0.0308399	1
11	63127194	63127364	rs10466668	Alt	G	-0.12	2.74812	2.52703	0.0388736	1.22	0.0269484
11	63127194	63127364	rs10466668	Alt	T	-0.31	4.8561	4.52793	0.0721794	1.07	0.398442
11	63127194	63127364	rs10466668	Ref	A	-0.41	14.1175	13.4326	0.0529804	1
13	74653421	74653591	rs10467409	Alt	C	0.13	2.66344	2.44694	0.0417675	1.27	0.054824
13	74653421	74653591	rs10467409	Alt	G	-0.03	0.269618	0.232661	0.0425905	1.14	0.285731
13	74653421	74653591	rs10467409	Alt	T	-0.34	12.0725	11.4571	0.0474882	0.92	0.348554
13	74653421	74653591	rs10467409	Ref	A	-0.22	4.61441	4.29886	0.0511674	1
13	74653496	74653666	rs10467412	Alt	C	-0.23	4.75661	4.43368	0.054187	0.7	0.00844357
13	74653496	74653666	rs10467412	Alt	G	-0.09	1.24418	1.11969	0.0466787	0.78	0.027421
13	74653496	74653666	rs10467412	Alt	T	0.01	0.0591711	0.049482	0.045593	0.83	0.0433636
13	74653496	74653666	rs10467412	Ref	A	0.28	10.497	9.9386	0.0419652	1
5	23328748	23328918	rs10472497	Alt	A	-0.4	31.2315	30.1247	0.0342122	0.81	0.0151262
5	23328748	23328918	rs10472497	Alt	C	-0.34	23.4098	22.4706	0.0337285	0.85	0.00202169
5	23328748	23328918	rs10472497	Alt	G	-0.15	4.02616	3.7364	0.0383868	0.97	0.50003
5	23328748	23328918	rs10472497	Ref	T	-0.1	3.0434	2.80627	0.030579	1
5	23310621	23310791	rs10473634	Alt	G	-0.07	0.891393	0.793773	0.0455964	1.08	0.344587
5	23310621	23310791	rs10473634	Ref	C	-0.18	5.67632	5.30988	0.0379302	1
5	23342506	23342676	rs10473637	Alt	A	-0.11	0.806464	0.716006	0.0767334	0.92	0.110838
5	23342506	23342676	rs10473637	Alt	T	0.36	10.9454	10.3709	0.0532082	1.27	0.0147821
5	23342506	23342676	rs10473637	Ref	C	0.01	0.0540362	0.0454067	0.0854908	1
5	104581566	104581736	rs10477834	Alt	C	0.31	7.98159	7.51975	0.0547997	0.84	0.0280182
5	104581566	104581736	rs10477834	Alt	G	0.13	2.88329	2.65493	0.0401555	0.74	0.0203363
5	104581566	104581736	rs10477834	Ref	A	0.56	21.8866	20.9793	0.0572602	1
5	104581753	104581923	rs10477835	Alt	A	-0.09	1.07511	0.962962	0.0539768	1.12	0.0678186
5	104581753	104581923	rs10477835	Alt	C	0.01	0.100877	0.0853768	0.0395181	1.21	0.0457963
5	104581753	104581923	rs10477835	Ref	T	-0.26	8.0633	7.59765	0.0449421	1
5	104579657	104579827	rs10479296	Alt	A	-0.02	0.164835	0.14072	0.0475897	1.02	0.960047
5	104579657	104579827	rs10479296	Ref	G	-0.05	0.477259	0.416499	0.0488992	1
5	104579942	104580112	rs10479297	Alt	G	0.23	6.94781	6.52742	0.0429005	0.78	0.0223334
5	104579942	104580112	rs10479297	Alt	T	0.26	9.64425	9.11702	0.0407703	0.8	0.00468727
5	104579942	104580112	rs10479297	Ref	A	0.58	54.2454	52.6799	0.0370802	1
5	104588435	104588605	rs10479298	Alt	A	0.27	8.62142	8.13496	0.0454779	1.37	0.0130724
5	104588435	104588605	rs10479298	Ref	G	-0.18	5.3094	4.95952	0.0400178	1
5	104664991	104665161	rs10479300	Alt	C	0.82	35.4101	34.2253	0.0656931	1.89	0.0232989
5	104664991	104665161	rs10479300	Ref	T	-0.09	0.864348	0.769128	0.061354	1
6	22647743	22647913	rs10485013	Alt	G	0.06	0.987546	0.882191	0.0381061	1.05	0.126324
6	22647743	22647913	rs10485013	Ref	A	-0.01	0.0883733	0.0746716	0.0377282	1
20	15254038	15254208	rs10485520	Alt	A	-0.42	13.1001	12.4495	0.0558349	0.67	0.0206082
20	15254038	15254208	rs10485520	Alt	T	-0.38	28.0994	27.0557	0.0342934	0.69	0.0402726
20	15254038	15254208	rs10485520	Ref	C	0.15	3.82163	3.54146	0.0398222	1
7	93568363	93568533	rs10488555	Alt	A	0.04	0.573414	0.50297	0.0376993	0.96	0.186895
7	93568363	93568533	rs10488555	Alt	C	0.19	5.79629	5.42396	0.0388279	1.06	0.0887367
7	93568363	93568533	rs10488555	Ref	T	0.11	2.70937	2.49035	0.0346633	1
6	76861074	76861244	rs10498910	Alt	C	0.13	4.22851	3.92931	0.0316924	1.13	0.0143442
6	76861074	76861244	rs10498910	Alt	G	-0.12	2.5753	2.36364	0.0393754	0.95	0.476682
6	76861074	76861244	rs10498910	Ref	A	-0.05	1.03217	0.923481	0.0305511	1
11	60543565	60543735	rs10501386	Alt	A	-0.08	1.21456	1.09242	0.0414983	0.87	0.154466
11	60543565	60543735	rs10501386	Alt	C	-0.2	4.89581	4.56562	0.04621	0.79	0.0498491
11	60543565	60543735	rs10501386	Ref	G	0.13	2.56109	2.34994	0.0438598	1
4	56925079	56925249	rs1050403714	Alt	A	0.08	0.567931	0.497988	0.0745493	0.77	0.0115465
4	56925079	56925249	rs1050403714	Alt	G	0.51	13.4737	12.8089	0.0678745	1.04	0.638966
4	56925079	56925249	rs1050403714	Alt	T	0.14	1.78298	1.61943	0.0587545	0.8	0.0308678
4	56925079	56925249	rs1050403714	Ref	C	0.46	18.6124	17.7946	0.0510553	1
8	59240430	59240600	rs10504289	Alt	C	1.14	95.5391	93.3496	0.0549147	2.17	0.00486493
8	59240430	59240600	rs10504289	Ref	G	0.02	0.317708	0.274459	0.0341868	1
8	59240452	59240622	rs10504290	Alt	A	0.35	20.6458	19.7754	0.0364204	1.25	0.0128839
8	59240452	59240622	rs10504290	Alt	T	-0.12	2.64838	2.43283	0.0402159	0.9	0.207783
8	59240452	59240622	rs10504290	Ref	G	0.03	0.296704	0.256131	0.0425571	1
10	53273609	53273779	rs1050462855	Alt	A	0.09	1.87122	1.70194	0.0375994	1.12	0.0284963
10	53273609	53273779	rs1050462855	Ref	G	-0.07	1.41501	1.2778	0.0330524	1
12	94143264	94143434	rs10507029	Alt	G	0.21	6.44672	6.04665	0.041164	0.86	0.0202445
12	94143264	94143434	rs10507029	Ref	A	0.43	28.8794	27.8209	0.0377097	1
10	20983263	20983433	rs10508636	Alt	A	-0.23	9.39735	8.87886	0.0364305	0.89	0.0268176
10	20983263	20983433	rs10508636	Alt	G	-0.09	1.7551	1.59337	0.0367595	0.98	0.634544
10	20983263	20983433	rs10508636	Ref	T	-0.06	1.2265	1.10343	0.0338764	1
10	51887954	51888124	rs1051042672	Alt	C	-0.43	13.849	13.1727	0.0559858	1.04	0.465746
10	51887954	51888124	rs1051042672	Alt	G	-0.24	3.10162	2.861	0.0703329	1.19	0.0780768
10	51887954	51888124	rs1051042672	Ref	T	-0.48	25.7633	24.7693	0.0453725	1
4	111855953	111856123	rs10516580	Alt	G	-0.34	17.9802	17.182	0.0388225	0.66	0.00672787
4	111855953	111856123	rs10516580	Ref	A	0.27	16.6771	15.9094	0.0315076	1
16	48972416	48972586	rs10521173	Alt	C	-0.13	4.52765	4.21593	0.0312951	1.06	0.0370816
16	48972416	48972586	rs10521173	Ref	T	-0.21	8.31758	7.84389	0.0355891	1
6	31394319	31394489	rs1052413	Alt	A	0.08	1.48786	1.34528	0.0383138	0.98	0.593613
6	31394319	31394489	rs1052413	Alt	C	-0.4	14.9491	14.2353	0.0495606	0.7	0.0256824
6	31394319	31394489	rs1052413	Ref	T	0.11	2.35954	2.16023	0.0397974	1
6	31394317	31394487	rs1052414	Alt	A	-0.25	4.10483	3.81172	0.0638641	0.77	0.0740443
6	31394317	31394487	rs1052414	Alt	C	0.2	6.51127	6.10828	0.0390123	1.06	0.0996524
6	31394317	31394487	rs1052414	Alt	T	0.12	2.9613	2.72847	0.0363199	1	0.972757
6	31394317	31394487	rs1052414	Ref	G	0.12	2.39211	2.19081	0.0409572	1
1	150622140	150622310	rs1053701	Alt	T	0.22	5.5618	5.20016	0.0477492	1.01	0.727403
1	150622140	150622310	rs1053701	Ref	C	0.21	7.1153	6.68762	0.038616	1
8	105514950	105515120	rs10549473	Alt	C	0.13	2.88661	2.65804	0.0408055	1.23	0.00737219
8	105514950	105515120	rs10549473	Alt	CATTATT	0.36	16.1459	15.3932	0.0431781	1.44	0.0149513
8	105514950	105515120	rs10549473	Ref	CATT	-0.17	4.4323	4.12407	0.0410688	1
10	53205017	53205187	rs1055683713	Alt	C	0.13	2.84328	2.61677	0.039676	1.08	0.0121207
10	53205017	53205187	rs1055683713	Ref	A	0.02	0.1739	0.148548	0.0359755	1
12	553587	553757	rs1056008	Alt	C	1.23	17.3658	16.5825	0.141872	2	0.00992961
12	553587	553757	rs1056008	Ref	T	0.23	9.59513	9.06933	0.036632	1
12	86205242	86205412	rs10566416	Alt	A	0.52	14.8148	14.1062	0.0655905	1.41	0.0534053
12	86205242	86205412	rs10566416	Ref	ATAGT	0.02	0.114547	0.0971132	0.0778526	1
4	77919713	77919883	rs10618413	Alt	A	0.59	44.553	43.1837	0.0415664	1.26	0.0112227
4	77919713	77919883	rs10618413	Alt	AATATATAT	-0.1	0.93463	0.833635	0.0623315	0.79	0.0243407
4	77919713	77919883	rs10618413	Ref	AATAT	0.25	5.70677	5.33869	0.0525919	1
3	63495872	63496042	rs10624998	Alt	GGAT	0.02	0.270298	0.233229	0.0330756	1	0.948181
3	63495872	63496042	rs10624998	Ref	G	0.02	0.213073	0.182939	0.0378724	1
6	158346732	158346902	rs10635550	Alt	TTGA	-0.05	0.615981	0.541461	0.0423649	1.21	0.0389572
6	158346732	158346902	rs10635550	Ref	T	-0.33	9.10404	8.59865	0.0532487	1
6	158329743	158329913	rs10640677	Alt	ACTAT	-0.18	4.66909	4.35056	0.0428407	0.85	0.0365519
6	158329743	158329913	rs10640677	Alt	ACTATCTAT	-0.05	0.742265	0.657074	0.0351692	0.93	0.0919422
6	158329743	158329913	rs10640677	Ref	A	0.05	0.833371	0.74069	0.0374119	1
4	77872211	77872381	rs10650101	Alt	A	0.2	4.45818	4.14933	0.0473289	0.89	0.0139909
4	77872211	77872381	rs10650101	Alt	AAATTAATT	0.77	76.6016	74.6711	0.041519	1.32	0.0103693
4	77872211	77872381	rs10650101	Ref	AAATT	0.37	18.5121	17.698	0.0413673	1
2	29657340	29657510	rs10651180	Alt	GAT	0.02	0.262466	0.226139	0.0335659	0.87	0.00320246
2	29657340	29657510	rs10651180	Ref	G	0.21	7.57601	7.12963	0.038446	1
11	63121431	63121601	rs10688607	Alt	TTAG	0.33	15.3012	14.5766	0.0410201	1.05	0.073562
11	63121431	63121601	rs10688607	Ref	T	0.26	14.6967	13.993	0.0329081	1
4	77999013	77999183	rs10708178	Alt	C	-0.13	2.95153	2.71959	0.0405045	1.09	0.0165711
4	77999013	77999183	rs10708178	Ref	CA	-0.26	9.77767	9.24465	0.0408995	1
6	158330054	158330224	rs10712312	Alt	C	0.41	23.7164	22.77	0.0405064	1.36	0.0022524
6	158330054	158330224	rs10712312	Alt	CTT	0.31	14.3986	13.7045	0.0388604	1.26	0.0126322
6	158330054	158330224	rs10712312	Ref	CT	-0.03	0.298995	0.257833	0.0418366	1
1	42014564	42014734	rs10736422	Alt	G	-0.36	17.7902	16.9973	0.0405015	0.83	0.0510715
1	42014564	42014734	rs10736422	Alt	T	0.1	2.52692	2.3174	0.035037	1.14	0.0533023
1	42014564	42014734	rs10736422	Ref	C	-0.08	1.27456	1.14758	0.04137	1
11	63145701	63145871	rs10736724	Alt	A	0.12	3.13366	2.89118	0.0342308	1.04	0.275452
11	63145701	63145871	rs10736724	Ref	G	0.06	1.23679	1.11287	0.0329228	1
9	11825144	11825314	rs10738253	Alt	G	-0.32	11.6168	11.02	0.0459259	1	0.996785
9	11825144	11825314	rs10738253	Alt	T	-0.04	0.60727	0.533656	0.0376585	1.21	0.011982
9	11825144	11825314	rs10738253	Ref	C	-0.32	12.1387	11.5213	0.0449258	1
12	94154188	94154358	rs10745677	Alt	A	-0.27	2.6065	2.3937	0.0894986	1.04	0.718411
12	94154188	94154358	rs10745677	Alt	C	-0.16	1.00256	0.895944	0.0956781	1.13	0.219914
12	94154188	94154358	rs10745677	Alt	G	-0.19	1.59788	1.44734	0.0842303	1.1	0.485758
12	94154188	94154358	rs10745677	Ref	T	-0.33	2.45887	2.25348	0.112363	1
10	114309830	114310000	rs10749159	Alt	A	0.27	9.65931	9.13146	0.0421394	0.85	0.0430232
10	114309830	114310000	rs10749159	Alt	C	0.1	1.70438	1.54614	0.0419959	0.75	0.0087215
10	114309830	114310000	rs10749159	Ref	G	0.5	42.6126	41.2821	0.0365631	1
10	1581189	1581359	rs10751804	Alt	A	-0.3	14.5815	13.882	0.0378859	0.96	0.312679
10	1581189	1581359	rs10751804	Alt	T	-0.08	1.93944	1.76564	0.0333767	1.12	0.107531
10	1581189	1581359	rs10751804	Ref	G	-0.25	6.57287	6.16741	0.0480579	1
10	1581209	1581379	rs10751805	Alt	A	0.27	18.0005	17.2016	0.030821	1.25	0.0101833
10	1581209	1581379	rs10751805	Alt	C	-0.06	0.910605	0.811339	0.0404055	0.99	0.953202
10	1581209	1581379	rs10751805	Ref	T	-0.05	0.829735	0.737242	0.0355789	1
10	8507225	8507395	rs10752140	Alt	A	0.67	67.1143	65.3358	0.0382901	1.57	0.0017734
10	8507225	8507395	rs10752140	Alt	C	0.41	28.6508	27.5986	0.0361177	1.31	0.0161271
10	8507225	8507395	rs10752140	Ref	T	0.02	0.137078	0.116712	0.0495892	1
16	81150351	81150521	rs1075488	Alt	T	-0.05	1.05888	0.948111	0.0321107	0.96	0.397992
16	81150351	81150521	rs1075488	Ref	C	0	0.0273762	0.0229216	0.0370984	1
16	81150302	81150472	rs1075489	Alt	C	0.1	2.37062	2.17058	0.0354532	1.27	0.00505301
16	81150302	81150472	rs1075489	Ref	T	-0.24	9.75521	9.2227	0.037755	1
9	11813985	11814155	rs10756292	Alt	A	0	0.0172403	0.0144544	0.0574306	0.93	0.129049
9	11813985	11814155	rs10756292	Alt	C	0.21	5.37256	5.02035	0.0459237	1.08	0.0510594
9	11813985	11814155	rs10756292	Ref	G	0.1	2.23741	2.04467	0.0365625	1
9	11817750	11817920	rs10756293	Alt	G	0.05	0.425738	0.371151	0.0508778	0.99	0.911518
9	11817750	11817920	rs10756293	Ref	C	0.05	0.830388	0.737858	0.0372841	1
9	11823462	11823632	rs10756294	Alt	C	0	0.0207911	0.0176058	0.0645055	0.91	0.11087
9	11823462	11823632	rs10756294	Alt	G	0.01	0.0658675	0.0554035	0.0651132	0.92	0.0113334
9	11823462	11823632	rs10756294	Alt	T	0.31	8.23449	7.76319	0.0538597	1.14	0.0162884
9	11823462	11823632	rs10756294	Ref	A	0.13	1.49265	1.34973	0.0599733	1
9	11844713	11844883	rs10756296	Alt	C	-0.19	6.41513	6.01606	0.0368623	1.07	0.0558686
9	11844713	11844883	rs10756296	Alt	T	-0.16	4.96477	4.63085	0.0366682	1.09	0.0298054
9	11844713	11844883	rs10756296	Ref	G	-0.29	17.2051	16.4249	0.0336091	1
9	11844812	11844982	rs10756297	Alt	A	-0.21	5.38258	5.02955	0.0448944	0.93	0.143494
9	11844812	11844982	rs10756297	Alt	C	-0.06	0.905219	0.806528	0.0371864	1.03	0.350121
9	11844812	11844982	rs10756297	Ref	T	-0.1	1.92288	1.74984	0.03967	1
9	11872692	11872862	rs10756303	Alt	A	0.34	15.265	14.5417	0.0417338	1.47	0.00369487
9	11872692	11872862	rs10756303	Alt	C	-0.28	8.69482	8.20393	0.0467725	0.96	0.162808
9	11872692	11872862	rs10756303	Alt	G	-0.28	8.10223	7.63533	0.0490276	0.95	0.154203
9	11872692	11872862	rs10756303	Ref	T	-0.22	8.27929	7.80636	0.0369208	1
3	50614953	50615123	rs1076904	Alt	T	-0.03	0.33975	0.294237	0.0467615	1.03	0.473079
3	50614953	50615123	rs1076904	Ref	C	-0.08	1.05309	0.943069	0.0451748	1
12	86228551	86228721	rs10776953	Alt	C	0.08	1.3136	1.18363	0.038418	0.94	0.297954
12	86228551	86228721	rs10776953	Alt	T	0.16	5.50304	5.14454	0.0352578	1	0.921364
12	86228551	86228721	rs10776953	Ref	G	0.16	2.65492	2.43902	0.0521408	1
12	69976511	69976681	rs10784816	Alt	T	-0.1	1.81028	1.64518	0.0423414	0.76	0.014759
12	69976511	69976681	rs10784816	Ref	A	0.28	13.7181	13.046	0.0371219	1
12	69976771	69976941	rs10784817	Alt	C	-0.26	4.32029	4.01773	0.0633027	0.73	0.01536
12	69976771	69976941	rs10784817	Alt	G	-0.38	7.10835	6.68099	0.0710811	0.67	0.00566893
12	69976771	69976941	rs10784817	Ref	A	0.2	2.83648	2.61032	0.0632181	1
10	114292518	114292688	rs10787522	Alt	A	-0.28	10.9248	10.3511	0.0411228	0.81	0.0157131
10	114292518	114292688	rs10787522	Alt	T	-0.03	0.339751	0.294237	0.0384186	0.96	0.39118
10	114292518	114292688	rs10787522	Ref	G	0.03	0.401718	0.349821	0.0382909	1
1	150785486	150785656	rs10788795	Alt	G	-0.32	11.678	11.0789	0.0456289	0.68	0.0495356
1	150785486	150785656	rs10788795	Alt	T	-0.03	0.352485	0.305784	0.0347129	0.84	0.091588
1	150785486	150785656	rs10788795	Ref	A	0.23	5.99855	5.61768	0.0471131	1
11	59291621	59291791	rs10792230	Alt	A	-0.36	15.2578	14.5348	0.0438717	0.92	0.195092
11	59291621	59291791	rs10792230	Alt	G	-0.31	12.4923	11.8623	0.0423094	0.95	0.32806
11	59291621	59291791	rs10792230	Alt	T	-0.34	16.0634	15.3129	0.0403509	0.93	0.119432
11	59291621	59291791	rs10792230	Ref	C	-0.23	6.03027	5.64793	0.0467705	1
11	63094544	63094714	rs10792385	Alt	A	-0.32	14.5073	13.8104	0.040568	0.99	0.543428
11	63094544	63094714	rs10792385	Alt	G	-0.28	9.72884	9.19799	0.0436297	1.02	0.704679
11	63094544	63094714	rs10792385	Alt	T	-0.4	22.9922	22.0629	0.0398731	0.93	0.121925
11	63094544	63094714	rs10792385	Ref	C	-0.3	9.91262	9.37468	0.0466705	1
11	63094823	63094993	rs10792386	Alt	A	0.26	9.96748	9.42784	0.0399793	1.08	0.23983
11	63094823	63094993	rs10792386	Alt	G	0.43	15.0773	14.3599	0.0528767	1.21	0.00399507
11	63094823	63094993	rs10792386	Ref	C	0.15	3.09229	2.85262	0.0444675	1
11	63105930	63106100	rs10792387	Alt	C	0.39	25.3617	24.3736	0.0365762	1.13	0.118202
11	63105930	63106100	rs10792387	Ref	T	0.21	6.9746	6.55341	0.039744	1
11	63107543	63107713	rs10792389	Alt	G	0	0.0246349	0.0207153	0.0421352	1.17	0.0172898
11	63107543	63107713	rs10792389	Alt	T	-0.11	1.8979	1.72655	0.0457605	1.08	0.159906
11	63107543	63107713	rs10792389	Ref	C	-0.23	9.72505	9.19442	0.0359898	1
11	63107987	63108157	rs10792390	Alt	A	0.22	7.52635	7.08184	0.0404259	1.29	0.0548205
11	63107987	63108157	rs10792390	Alt	C	-0.37	23.9284	22.9776	0.0362889	0.86	0.0551614
11	63107987	63108157	rs10792390	Alt	T	-0.18	6.65572	6.24675	0.0349763	0.98	0.649032
11	63107987	63108157	rs10792390	Ref	G	-0.15	2.9852	2.75122	0.0449678	1
11	63131529	63131699	rs10792396	Alt	A	-0.14	3.08244	2.84336	0.0420066	0.82	0.0212332
11	63131529	63131699	rs10792396	Alt	C	-0.06	0.881634	0.785045	0.0427293	0.86	0.0305511
11	63131529	63131699	rs10792396	Alt	G	-0.22	7.51923	7.07515	0.0399123	0.77	0.0050673
11	63131529	63131699	rs10792396	Ref	T	0.15	4.38182	4.07649	0.0376346	1
11	63140095	63140265	rs10792397	Alt	G	0.3	15.8654	15.1209	0.0359681	1.22	0.00206183
11	63140095	63140265	rs10792397	Alt	T	-0.2	6.78743	6.37326	0.0379569	0.86	0.0529709
11	63140095	63140265	rs10792397	Ref	C	0.01	0.162543	0.138676	0.0336962	1
10	1579794	1579964	rs10794764	Alt	G	-0.02	0.328459	0.284029	0.0324108	1.11	0.0282538
10	1579794	1579964	rs10794764	Alt	T	-0.04	0.658827	0.580925	0.0327005	1.1	0.0782589
10	1579794	1579964	rs10794764	Ref	C	-0.18	6.4595	6.05882	0.0344414	1
10	8506867	8507037	rs10795651	Alt	A	-0.55	21.466	20.5692	0.0563254	0.97	0.411978
10	8506867	8507037	rs10795651	Alt	T	-0.46	37.7566	36.5245	0.0353431	1.03	0.485517
10	8506867	8507037	rs10795651	Ref	G	-0.5	37.004	35.7842	0.0388457	1
10	8510426	8510596	rs10795652	Alt	A	-0.25	7.52073	7.07648	0.0459818	0.75	0.00753665
10	8510426	8510596	rs10795652	Alt	C	0.1	2.20725	2.01602	0.0371502	0.96	0.395895
10	8510426	8510596	rs10795652	Alt	G	-0.1	1.62199	1.47007	0.0426532	0.84	0.0207138
10	8510426	8510596	rs10795652	Ref	T	0.16	4.91301	4.58178	0.0362116	1
1	118387467	118387637	rs10802026	Alt	A	0.13	0.366645	0.318514	0.162547	0.95	0.673324
1	118387467	118387637	rs10802026	Ref	G	0.21	1.40452	1.26783	0.101304	1
1	15085688	15085858	rs10803349	Alt	A	-0.2	7.14218	6.71368	0.0370113	0.97	0.236693
1	15085688	15085858	rs10803349	Alt	C	0.2	6.48806	6.08615	0.0395919	1.28	0.00783301
1	15085688	15085858	rs10803349	Ref	T	-0.16	3.5142	3.25068	0.0441096	1
1	15086132	15086302	rs10803350	Alt	C	0.41	33.274	32.1298	0.0339816	1.17	0.0321902
1	15086132	15086302	rs10803350	Ref	T	0.19	3.97989	3.69196	0.0477877	1
1	15086133	15086303	rs10803351	Alt	A	0.2	7.6925	7.24253	0.0357605	0.97	0.200825
1	15086133	15086303	rs10803351	Alt	T	0.21	8.4809	8.00038	0.0357911	0.98	0.521388
1	15086133	15086303	rs10803351	Ref	G	0.24	11.6912	11.0911	0.034503	1
2	130112939	130113109	rs10803614	Alt	C	-0.08	2.02637	1.84711	0.030924	1.1	0.00518899
2	130112939	130113109	rs10803614	Ref	A	-0.22	12.3574	11.7331	0.0305198	1
2	217745445	217745615	rs10804262	Alt	A	-0.2	3.43731	3.17858	0.0567606	0.64	0.0166378
2	217745445	217745615	rs10804262	Alt	C	0.11	1.78214	1.61872	0.0447492	0.8	0.0125739
2	217745445	217745615	rs10804262	Alt	T	0.01	0.0910962	0.0769849	0.0366295	0.74	0.0163468
2	217745445	217745615	rs10804262	Ref	G	0.44	18.579	17.7624	0.0487547	1
6	158317575	158317745	rs10806695	Alt	A	-0.13	2.69016	2.47215	0.0414848	0.97	0.627924
6	158317575	158317745	rs10806695	Alt	C	0.22	10.6941	10.1293	0.0323562	1.23	0.000767991
6	158317575	158317745	rs10806695	Alt	G	-0.46	26.2002	25.1947	0.0425051	0.77	5.94605e-05
6	158317575	158317745	rs10806695	Ref	T	-0.08	1.6812	1.5248	0.0366146	1
9	11812097	11812267	rs10809606	Alt	A	0.14	4.7646	4.44121	0.0320012	1.03	0.067106
9	11812097	11812267	rs10809606	Alt	C	0.42	25.8727	24.8759	0.0397618	1.26	0.027135
9	11812097	11812267	rs10809606	Alt	G	0.32	14.6099	13.9087	0.0403473	1.17	0.0584218
9	11812097	11812267	rs10809606	Ref	T	0.1	1.87192	1.70251	0.0384493	1
9	11822716	11822886	rs10809610	Alt	A	0.07	1.19888	1.07779	0.0359251	0.96	0.080114
9	11822716	11822886	rs10809610	Alt	G	-0.03	0.297385	0.256691	0.0377407	0.9	0.217153
9	11822716	11822886	rs10809610	Alt	T	-0.11	1.24372	1.11927	0.058112	0.85	0.110728
9	11822716	11822886	rs10809610	Ref	C	0.13	2.99228	2.75804	0.0384213	1
9	11842349	11842519	rs10809613	Alt	T	0.28	5.61834	5.25416	0.0587933	1.11	0.250008
9	11842349	11842519	rs10809613	Ref	C	0.13	3.94965	3.66314	0.0327865	1
9	11845122	11845292	rs10809616	Alt	A	0.21	9.91437	9.37621	0.0333388	1.36	0.00142088
9	11845122	11845292	rs10809616	Alt	G	-0.11	2.75199	2.53049	0.0341113	1.09	0.0854186
9	11845122	11845292	rs10809616	Alt	T	0.25	8.88905	8.38986	0.0414411	1.4	0.00249034
9	11845122	11845292	rs10809616	Ref	C	-0.23	6.59707	6.19106	0.0444104	1
9	11845906	11846076	rs10809617	Alt	A	-0.03	0.248156	0.213789	0.0514829	0.85	0.0120277
9	11845906	11846076	rs10809617	Alt	C	0.05	0.443643	0.38687	0.0524687	0.9	0.00293202
9	11845906	11846076	rs10809617	Alt	G	-0.08	0.911283	0.811831	0.0493645	0.83	0.0358346
9	11845906	11846076	rs10809617	Ref	T	0.2	4.19985	3.90216	0.049428	1
9	11870934	11871104	rs10809626	Alt	G	0.43	23.4153	22.4758	0.0420822	0.96	0.0292707
9	11870934	11871104	rs10809626	Alt	T	0.51	40.6451	39.3552	0.0378614	1.02	0.223269
9	11870934	11871104	rs10809626	Ref	C	0.48	37.5192	36.2892	0.0371812	1
9	11875945	11876115	rs10809629	Alt	A	0.4	28.5052	27.454	0.0356693	1.36	0.0106516
9	11875945	11876115	rs10809629	Alt	C	0.18	7.44856	7.00752	0.0330859	1.17	0.00389674
9	11875945	11876115	rs10809629	Alt	G	0.14	4.4753	4.16589	0.032698	1.13	0.020993
9	11875945	11876115	rs10809629	Ref	T	-0.04	0.845867	0.752272	0.0302303	1
9	11880405	11880575	rs10809634	Alt	A	0.25	9.70988	9.17966	0.0387095	1.32	0.0230752
9	11880405	11880575	rs10809634	Alt	C	-0.13	4.41877	4.11165	0.0310244	1.02	0.391024
9	11880405	11880575	rs10809634	Alt	G	-0.14	3.4963	3.23401	0.038186	1.01	0.76036
9	11880405	11880575	rs10809634	Ref	T	-0.15	4.13191	3.83724	0.0379873	1
9	8000279	8000449	rs10815736	Alt	C	0.34	20.0961	19.2375	0.0359525	1.3	0.0469154
9	8000279	8000449	rs10815736	Alt	G	0.34	12.9363	12.2931	0.0455608	1.3	0.0171927
9	8000279	8000449	rs10815736	Ref	A	-0.04	0.442971	0.386233	0.0428008	1
10	30751966	30752136	rs10826861	Alt	C	0.79	75.922	74.0092	0.0423797	0.89	0.0556442
10	30751966	30752136	rs10826861	Alt	G	1.16	60.4988	58.8299	0.0702878	1.15	0.0979625
10	30751966	30752136	rs10826861	Ref	A	0.96	80.4807	78.5064	0.0502548	1
10	30752120	30752290	rs10826862	Alt	C	0.01	0.116458	0.0988874	0.0395758	1.19	0.037705
10	30752120	30752290	rs10826862	Alt	G	-0.12	3.26971	3.02008	0.0359567	1.08	0.165058
10	30752120	30752290	rs10826862	Ref	A	-0.24	6.01617	5.63442	0.0482171	1
10	30755195	30755365	rs10826864	Alt	A	0.13	3.15867	2.91496	0.0397777	0.96	0.11997
10	30755195	30755365	rs10826864	Ref	G	0.2	8.04601	7.5809	0.0344865	1
10	30769677	30769847	rs10826866	Alt	A	-0.29	11.8066	11.2013	0.0407791	0.9	0.0393782
10	30769677	30769847	rs10826866	Alt	T	-0.23	6.88336	6.4653	0.0429205	0.94	0.113268
10	30769677	30769847	rs10826866	Ref	C	-0.13	3.11041	2.86926	0.039824	1
10	20977813	20977983	rs10828163	Alt	A	-0.18	5.70643	5.33842	0.0388017	0.76	0.00971831
10	20977813	20977983	rs10828163	Alt	C	0.4	24.2211	23.2621	0.0385055	1.14	0.0106164
10	20977813	20977983	rs10828163	Alt	T	0.3	12.0147	11.4024	0.0419867	1.07	0.17978
10	20977813	20977983	rs10828163	Ref	G	0.21	5.61705	5.25308	0.0436939	1
10	20983010	20983180	rs10828164	Alt	C	-0.46	16.5017	15.7395	0.0547553	0.48	0.00785118
10	20983010	20983180	rs10828164	Alt	G	-0.36	12.7377	12.1022	0.0486591	0.51	0.017558
10	20983010	20983180	rs10828164	Ref	A	0.6	42.4109	41.0844	0.0437705	1
10	20996117	20996287	rs10828167	Alt	A	0.26	11.2726	10.6855	0.0374824	1.14	0.0639964
10	20996117	20996287	rs10828167	Alt	C	-0.13	3.65719	3.38622	0.0360368	0.87	0.147594
10	20996117	20996287	rs10828167	Ref	G	0.07	1.18951	1.06923	0.0388749	1
12	121230366	121230536	rs10849860	Alt	C	0.75	50.8827	49.3817	0.0495972	1.07	0.116567
12	121230366	121230536	rs10849860	Ref	T	0.65	28.2265	27.1811	0.0585099	1
16	48972462	48972632	rs10852587	Alt	A	-0.08	0.884042	0.787109	0.0523138	0.99	0.978657
16	48972462	48972632	rs10852587	Alt	G	-0.03	0.42625	0.371593	0.0329107	1.03	0.175271
16	48972462	48972632	rs10852587	Ref	T	-0.07	1.26951	1.1429	0.0368558	1
19	14339385	14339555	rs10854130	Alt	C	0.04	0.497408	0.434436	0.0439956	1.08	0.01767
19	14339385	14339555	rs10854130	Alt	G	0.22	9.72112	9.19058	0.0352814	1.22	0.00760174
19	14339385	14339555	rs10854130	Alt	T	-0.17	5.64712	5.28146	0.0366934	0.93	0.0203325
19	14339385	14339555	rs10854130	Ref	A	-0.06	1.10358	0.98909	0.0351433	1
4	77963908	77964078	rs10856991	Alt	A	0.08	1.39332	1.25763	0.0388073	1.24	0.016662
4	77963908	77964078	rs10856991	Ref	C	-0.23	10.1487	9.60297	0.0352572	1
12	86299188	86299358	rs10858409	Alt	C	0.19	6.27291	5.87991	0.0369431	1.2	0.0330108
12	86299188	86299358	rs10858409	Alt	T	-0.1	1.6603	1.5053	0.0440212	0.98	0.432009
12	86299188	86299358	rs10858409	Ref	G	-0.07	1.28542	1.15762	0.037627	1
12	86310096	86310266	rs10858412	Alt	A	0.52	48.2422	46.7982	0.0350476	1.15	0.108744
12	86310096	86310266	rs10858412	Alt	C	0.24	9.08472	8.58001	0.0392475	0.95	0.179327
12	86310096	86310266	rs10858412	Alt	T	0.5	56.6863	55.082	0.0313851	1.13	0.0149929
12	86310096	86310266	rs10858412	Ref	G	0.32	19.2359	18.4011	0.0349889	1
12	94162817	94162987	rs10859679	Alt	C	-0.02	0.238517	0.205397	0.0390429	0.99	0.283081
12	94162817	94162987	rs10859679	Alt	T	0.14	1.96289	1.78785	0.0562108	1.11	0.0627972
12	94162817	94162987	rs10859679	Ref	A	-0.01	0.0720069	0.0604102	0.0356292	1
14	88065974	88066144	rs10873389	Alt	A	0.25	10.394	9.83894	0.0386085	1.05	0.063437
14	88065974	88066144	rs10873389	Ref	G	0.19	8.3619	7.88652	0.0320709	1
12	69987302	69987472	rs10879068	Alt	T	0.16	2.65961	2.44336	0.052486	0.84	0.0135528
12	69987302	69987472	rs10879068	Ref	G	0.42	18.9183	18.0922	0.0458418	1
10	104232875	104233045	rs10883987	Alt	T	0.43	31.8645	30.7479	0.0362111	1.09	0.0481504
10	104232875	104233045	rs10883987	Ref	C	0.3	15.6898	14.9516	0.0364849	1
10	114287592	114287762	rs10885543	Alt	C	0.03	0.368223	0.319943	0.0384577	0.92	0.00697938
10	114287592	114287762	rs10885543	Alt	T	-0.06	0.837952	0.745006	0.0388247	0.87	0.102481
10	114287592	114287762	rs10885543	Ref	G	0.14	5.12975	4.7886	0.0322364	1
1	150804953	150805123	rs10888396	Alt	A	0.43	34.1612	32.9992	0.0348621	1.56	0.00480117
1	150804953	150805123	rs10888396	Alt	C	0	0.00669737	0.00550564	0.0373167	1.16	0.000188865
1	150804953	150805123	rs10888396	Ref	T	-0.21	4.74158	4.41961	0.0488193	1
1	41943766	41943936	rs10890170	Alt	C	-0.11	1.79159	1.62742	0.0438974	0.98	0.847019
1	41943766	41943936	rs10890170	Ref	A	-0.07	0.624631	0.549532	0.0612378	1
1	42038194	42038364	rs10890176	Alt	C	-0.23	9.40375	8.88486	0.0370457	1.04	0.0185012
1	42038194	42038364	rs10890176	Alt	T	-0.14	1.82704	1.66082	0.0554736	1.12	0.101522
1	42038194	42038364	rs10890176	Ref	A	-0.29	13.0634	12.4146	0.0394977	1
1	42040625	42040795	rs10890177	Alt	A	0.01	0.0950677	0.0801992	0.0334452	0.98	0.478462
1	42040625	42040795	rs10890177	Alt	C	-0.11	3.0731	2.83455	0.0321466	0.9	0.0173698
1	42040625	42040795	rs10890177	Ref	T	0.04	0.711789	0.628931	0.0332585	1
11	60517224	60517394	rs10897077	Alt	C	-0.14	1.61103	1.45962	0.0634148	1.08	0.143531
11	60517224	60517394	rs10897077	Ref	A	-0.26	6.01093	5.62947	0.0527579	1
11	60541399	60541569	rs10897085	Alt	A	-0.34	12.759	12.1224	0.0461259	0.82	0.00227189
11	60541399	60541569	rs10897085	Alt	C	-0.42	21.5764	20.6772	0.0432618	0.78	0.0157631
11	60541399	60541569	rs10897085	Ref	T	-0.06	0.647249	0.570186	0.0486379	1
11	63110056	63110226	rs10897356	Alt	G	-0.19	6.62144	6.21422	0.0364154	0.91	0.00828714
11	63110056	63110226	rs10897356	Alt	T	0.33	14.4858	13.7897	0.0413849	1.3	0.00639593
11	63110056	63110226	rs10897356	Ref	A	-0.06	0.812251	0.721153	0.0397728	1
11	63110081	63110251	rs10897357	Alt	A	-0.05	0.728008	0.643707	0.0373849	0.93	0.17608
11	63110081	63110251	rs10897357	Alt	C	-0.2	7.09736	6.6705	0.0367022	0.84	0.00932592
11	63110081	63110251	rs10897357	Ref	G	0.06	0.863344	0.7682	0.0380492	1
11	63110175	63110345	rs10897358	Alt	G	-0.14	3.45748	3.19725	0.0382161	1.08	0.121766
11	63110175	63110345	rs10897358	Ref	A	-0.25	5.44134	5.0861	0.0535348	1
11	63110205	63110375	rs10897359	Alt	A	-0.25	3.26114	3.0121	0.0727596	0.89	0.307856
11	63110205	63110375	rs10897359	Alt	C	-0.28	3.91422	3.62912	0.0739155	0.87	0.0116224
11	63110205	63110375	rs10897359	Alt	G	-0.32	2.85495	2.62792	0.100403	0.85	0.120951
11	63110205	63110375	rs10897359	Ref	T	-0.08	0.262313	0.226053	0.134222	1
11	63111301	63111471	rs10897362	Alt	A	0.37	19.7854	18.9351	0.040021	1.35	0.00244347
11	63111301	63111471	rs10897362	Alt	C	-0.07	1.48075	1.33859	0.0348643	0.99	0.657215
11	63111301	63111471	rs10897362	Alt	G	-0.12	2.75272	2.53106	0.03828	0.96	0.431761
11	63111301	63111471	rs10897362	Ref	T	-0.07	1.34592	1.2136	0.0325265	1
11	63111368	63111538	rs10897363	Alt	C	0.18	7.03935	6.61492	0.0339961	1.06	0.281937
11	63111368	63111538	rs10897363	Alt	T	0.16	4.44135	4.13287	0.0384875	1.04	0.440746
11	63111368	63111538	rs10897363	Ref	A	0.1	2.03682	1.85682	0.0380065	1
11	63111600	63111770	rs10897364	Alt	A	0.72	40.0072	38.7261	0.0541212	1.1	0.026703
11	63111600	63111770	rs10897364	Alt	G	0.87	63.6844	61.9689	0.0510483	1.21	0.00513559
11	63111600	63111770	rs10897364	Alt	T	0.81	50.6129	49.1215	0.0538894	1.17	0.00918648
11	63111600	63111770	rs10897364	Ref	C	0.59	28.9993	27.9377	0.0520931	1
11	63112823	63112993	rs10897365	Alt	C	0.01	0.0876369	0.0740612	0.033694	0.82	0.0593793
11	63112823	63112993	rs10897365	Alt	G	0.16	4.76713	4.44362	0.0373591	0.91	0.0575257
11	63112823	63112993	rs10897365	Alt	T	0.02	0.302039	0.26064	0.034324	0.83	0.0048833
11	63112823	63112993	rs10897365	Ref	A	0.29	12.9847	12.3389	0.0394324	1
11	63124327	63124497	rs10897369	Alt	T	-0.2	7.40243	6.96408	0.0367554	0.99	0.411184
11	63124327	63124497	rs10897369	Ref	C	-0.19	8.90329	8.40391	0.0308766	1
11	63128758	63128928	rs10897370	Alt	G	-0.09	1.06885	0.957214	0.0503779	0.88	0.0418535
11	63128758	63128928	rs10897370	Alt	T	-0.23	4.68567	4.36612	0.053831	0.79	0.00651108
11	63128758	63128928	rs10897370	Ref	C	0.1	2.91711	2.68724	0.0315964	1
11	63128761	63128931	rs10897371	Alt	A	0.14	3.00229	2.76763	0.0414666	0.84	0.0646771
11	63128761	63128931	rs10897371	Alt	C	0.17	7.07452	6.64879	0.0323612	0.86	0.0204204
11	63128761	63128931	rs10897371	Ref	G	0.38	20.2859	19.4231	0.0406867	1
11	63131168	63131338	rs10897372	Alt	A	0.17	6.78532	6.37139	0.0321759	1.31	0.0162754
11	63131168	63131338	rs10897372	Alt	C	0.02	0.129317	0.109909	0.0468579	1.18	0.0341467
11	63131168	63131338	rs10897372	Ref	G	-0.22	9.40125	8.88256	0.0348134	1
11	63140115	63140285	rs10897374	Alt	A	-0.39	9.69729	9.168	0.0609407	1	0.947174
11	63140115	63140285	rs10897374	Alt	G	-0.16	3.25457	3.00588	0.0458628	1.17	0.0557612
11	63140115	63140285	rs10897374	Alt	T	-0.2	2.41572	2.21278	0.0701039	1.14	0.142088
11	63140115	63140285	rs10897374	Ref	C	-0.39	17.386	16.6023	0.0450063	1
10	44608195	44608365	rs10900077	Alt	A	0.67	39.0297	37.768	0.0504323	1.67	0.0206918
10	44608195	44608365	rs10900077	Ref	G	-0.07	1.25482	1.12953	0.0372917	1
1	204878702	204878872	rs10900426	Alt	A	-0.27	6.08639	5.70176	0.0549228	0.9	0.130733
1	204878702	204878872	rs10900426	Ref	G	-0.13	2.44711	2.24245	0.0432681	1
1	204878974	204879144	rs10900427	Alt	G	0.31	15.8574	15.1134	0.0377149	1.23	0.000352671
1	204878974	204879144	rs10900427	Alt	T	-0.08	0.764238	0.677239	0.0554804	0.94	0.0990991
1	204878974	204879144	rs10900427	Ref	C	0.02	0.194247	0.16656	0.0395571	1
1	204879181	204879351	rs10900428	Alt	A	-0.15	4.49242	4.18214	0.0352116	0.93	0.0580704
1	204879181	204879351	rs10900428	Alt	C	0.03	0.462017	0.402838	0.0369588	1.05	0.0515417
1	204879181	204879351	rs10900428	Ref	T	-0.04	0.602231	0.529001	0.0363242	1
1	204891755	204891925	rs10900429	Alt	A	0.15	3.73016	3.45541	0.0404703	0.83	0.00164244
1	204891755	204891925	rs10900429	Ref	G	0.42	21.7971	20.8925	0.0425742	1
1	204896071	204896241	rs10900430	Alt	C	0	0.00812556	0.00662773	0.0429694	1.09	0.0266841
1	204896071	204896241	rs10900430	Alt	G	0.11	3.27002	3.02034	0.0329886	1.18	0.0275693
1	204896071	204896241	rs10900430	Alt	T	-0.01	0.0760458	0.063787	0.0305857	1.09	0.0367985
1	204896071	204896241	rs10900430	Ref	A	-0.13	3.68308	3.41034	0.0348688	1
9	131060232	131060402	rs10901336	Alt	A	-0.17	3.87924	3.59556	0.0449239	0.94	0.123707
9	131060232	131060402	rs10901336	Alt	G	0.23	11.996	11.3846	0.0320124	1.24	0.0176983
9	131060232	131060402	rs10901336	Ref	T	-0.08	1.63067	1.47806	0.0351866	1
9	131060365	131060535	rs10901337	Alt	A	0.27	7.09293	6.66631	0.0501949	0.63	0.000414426
9	131060365	131060535	rs10901337	Alt	G	0.77	18.7748	17.953	0.0857065	0.89	0.0870647
9	131060365	131060535	rs10901337	Alt	T	0.43	13.882	13.2043	0.0559759	0.7	0.00590789
9	131060365	131060535	rs10901337	Ref	C	0.94	48.3251	46.8777	0.0639322	1
9	131061571	131061741	rs10901338	Alt	C	-0.03	0.276204	0.238349	0.0482378	0.91	0.241624
9	131061571	131061741	rs10901338	Ref	T	0.11	1.56266	1.41453	0.0484156	1
10	1580460	1580630	rs10903494	Alt	A	0.28	11.3127	10.7245	0.040902	0.92	0.315857
10	1580460	1580630	rs10903494	Alt	C	0.62	29.8677	28.7882	0.0539778	1.17	0.097464
10	1580460	1580630	rs10903494	Alt	G	-0.17	4.24396	3.94433	0.0411795	0.68	0.0273076
10	1580460	1580630	rs10903494	Ref	T	0.4	25.3069	24.321	0.0376128	1
10	1581454	1581624	rs10903496	Alt	A	-0.11	3.33929	3.08562	0.0323018	1.17	0.0443352
10	1581454	1581624	rs10903496	Alt	C	-0.48	25.1996	24.2169	0.0452091	0.91	0.00529504
10	1581454	1581624	rs10903496	Ref	G	-0.34	12.8456	12.2055	0.0463651	1
10	8526468	8526638	rs10905401	Alt	T	0.03	0.326362	0.282135	0.0409671	1.05	0.394925
10	8526468	8526638	rs10905401	Ref	C	-0.04	0.588852	0.516789	0.034025	1
10	8542977	8543147	rs10905403	Alt	C	-0.18	4.82739	4.50085	0.0416014	1	0.928761
10	8542977	8543147	rs10905403	Alt	G	0.04	0.502615	0.439148	0.0412378	1.17	0.0208923
10	8542977	8543147	rs10905403	Ref	A	-0.19	4.45994	4.15102	0.0451755	1
1	118306549	118306719	rs10923538	Alt	C	-0.03	0.26647	0.229745	0.0508203	0.86	0.000609725
1	118306549	118306719	rs10923538	Alt	G	0.38	18.6697	17.8513	0.0424965	1.14	0.0152524
1	118306549	118306719	rs10923538	Alt	T	0.18	4.97156	4.63712	0.0400174	0.99	0.198963
1	118306549	118306719	rs10923538	Ref	A	0.19	5.42045	5.06591	0.0420539	1
1	118351907	118352077	rs10923553	Alt	A	-0.28	12.4266	11.7993	0.0383437	0.76	0.00153708
1	118351907	118352077	rs10923553	Alt	T	-0.14	3.18907	2.94386	0.0407619	0.83	0.00560533
1	118351907	118352077	rs10923553	Ref	G	0.12	3.78053	3.50284	0.0322695	1
1	118387469	118387639	rs10923559	Alt	G	-0.2	1.99361	1.81642	0.0774235	0.83	0.0804006
1	118387469	118387639	rs10923559	Alt	T	-0.12	0.851432	0.757502	0.0813042	0.88	0.152402
1	118387469	118387639	rs10923559	Ref	A	0.07	0.250565	0.215927	0.118538	1
1	118391652	118391822	rs10923562	Alt	A	-0.27	12.1841	11.565	0.0378793	1.03	0.140403
1	118391652	118391822	rs10923562	Ref	G	-0.32	18.3047	17.4964	0.0357329	1
1	118398780	118398950	rs10923565	Alt	G	0.46	28.6804	27.6275	0.0405761	1.12	0.0942051
1	118398780	118398950	rs10923565	Ref	A	0.29	8.86315	8.36454	0.0484343	1
1	118409580	118409750	rs10923568	Alt	G	0.42	11.3045	10.7169	0.0610165	1.46	0.0317637
1	118409580	118409750	rs10923568	Ref	A	-0.13	1.17878	1.05942	0.0690017	1
1	118409912	118410082	rs10923569	Alt	T	-0.4	22.6894	21.7687	0.0402205	0.97	0.521952
1	118409912	118410082	rs10923569	Ref	C	-0.36	10.3544	9.80123	0.0550424	1
1	15086340	15086510	rs10927672	Alt	G	0.19	3.50315	3.24036	0.0519222	1.15	0.0967068
1	15086340	15086510	rs10927672	Alt	T	-0.36	23.9245	22.9741	0.0349576	0.79	0.00781934
1	15086340	15086510	rs10927672	Ref	A	-0.01	0.139401	0.118587	0.0411136	1
2	175850224	175850394	rs10930712	Alt	A	-0.46	23.2712	22.3362	0.045294	0.91	0.0831144
2	175850224	175850394	rs10930712	Ref	G	-0.32	11.8726	11.2656	0.0447593	1
2	175851841	175852011	rs10930713	Alt	A	0.28	17.7082	16.9167	0.0321733	1.08	0.100383
2	175851841	175852011	rs10930713	Ref	G	0.17	6.73391	6.32132	0.0325971	1
3	178633760	178633930	rs10936976	Alt	A	-0.06	0.963598	0.86048	0.0368858	0.97	0.231559
3	178633760	178633930	rs10936976	Alt	C	-0.24	7.08377	6.65747	0.0439908	0.86	0.00487698
3	178633760	178633930	rs10936976	Alt	G	-0.07	1.31857	1.1881	0.0357372	0.96	0.0411116
3	178633760	178633930	rs10936976	Ref	T	-0.01	0.12208	0.103788	0.0389287	1
4	4642248	4642418	rs10937878	Alt	A	-0.39	13.7146	13.0427	0.0510195	0.67	0.00642866
4	4642248	4642418	rs10937878	Alt	C	-0.46	24.7593	23.7879	0.0440633	0.64	0.00411543
4	4642248	4642418	rs10937878	Alt	T	-0.31	13.5332	12.8663	0.0401794	0.71	0.00367032
4	4642248	4642418	rs10937878	Ref	G	0.19	7.26531	6.8322	0.035423	1
4	4642463	4642633	rs10937879	Alt	G	-0.11	2.02059	1.84165	0.0417402	0.84	0.00103272
4	4642463	4642633	rs10937879	Alt	T	0.18	6.2921	5.89782	0.0360701	1.03	0.51503
4	4642463	4642633	rs10937879	Ref	C	0.14	3.99774	3.70875	0.0366239	1
4	4661070	4661240	rs10937880	Alt	T	-0.29	11.4372	10.8451	0.0416944	0.67	0.00161604
4	4661070	4661240	rs10937880	Ref	C	0.29	16.9105	16.1362	0.0336442	1
4	14098919	14099089	rs10939531	Alt	C	0.01	0.0610998	0.0511923	0.0346615	1.24	0.00770584
4	14098919	14099089	rs10939531	Alt	G	-0.33	12.5719	11.94	0.0448087	0.98	0.675533
4	14098919	14099089	rs10939531	Alt	T	-0.08	2.27348	2.07897	0.0304338	1.16	0.00954388
4	14098919	14099089	rs10939531	Ref	A	-0.3	12.9985	12.3522	0.0408733	1
5	23344156	23344326	rs10941983	Alt	A	0.19	7.0281	6.60448	0.0361575	1.31	0.0324915
5	23344156	23344326	rs10941983	Alt	C	0	0.00120443	0.000990771	0.0372824	1.14	0.017643
5	23344156	23344326	rs10941983	Ref	T	-0.19	6.55247	6.14785	0.0375609	1
6	158317705	158317875	rs10945539	Alt	C	-0.33	11.049	10.4702	0.0489639	1.03	0.349121
6	158317705	158317875	rs10945539	Alt	G	-0.11	2.85565	2.62857	0.0342848	1.2	0.0281859
6	158317705	158317875	rs10945539	Alt	T	-0.33	7.32222	6.8868	0.0602694	1.03	0.558485
6	158317705	158317875	rs10945539	Ref	A	-0.37	15.7291	14.9894	0.0449955	1
6	158317858	158318028	rs10945540	Alt	A	0.07	1.28751	1.15955	0.0351857	1.01	0.292244
6	158317858	158318028	rs10945540	Alt	C	-0.18	4.54101	4.2291	0.0438122	0.85	0.105906
6	158317858	158318028	rs10945540	Ref	G	0.05	0.869329	0.773577	0.0345254	1
6	158319101	158319271	rs10945541	Alt	C	0.04	0.651089	0.573844	0.0357142	1	0.670469
6	158319101	158319271	rs10945541	Alt	G	0.19	6.82963	6.41372	0.0360934	1.1	0.113736
6	158319101	158319271	rs10945541	Ref	A	0.05	0.951177	0.848986	0.0313506	1
6	158349181	158349351	rs10945543	Alt	A	-0.34	9.17766	8.66903	0.054308	0.98	0.653618
6	158349181	158349351	rs10945543	Alt	C	-0.11	1.88604	1.71586	0.0436836	1.15	0.00937219
6	158349181	158349351	rs10945543	Alt	T	0.3	11.2685	10.6816	0.0439743	1.53	0.0202973
6	158349181	158349351	rs10945543	Ref	G	-0.31	10.9875	10.4113	0.0450027	1
6	158349203	158349373	rs10945544	Alt	A	-0.25	9.80195	9.26767	0.0383732	1	0.815874
6	158349203	158349373	rs10945544	Alt	G	-0.01	0.144662	0.123188	0.0342185	1.18	0.00335521
6	158349203	158349373	rs10945544	Alt	T	-0.15	4.78976	4.46574	0.0343242	1.07	0.171369
6	158349203	158349373	rs10945544	Ref	C	-0.25	13.3761	12.7152	0.0329616	1
7	16921132	16921302	rs10950640	Alt	A	0.15	4.72612	4.40505	0.035421	1.05	0.170288
7	16921132	16921302	rs10950640	Alt	C	0.13	4.67404	4.35513	0.0312031	1.04	0.22303
7	16921132	16921302	rs10950640	Ref	G	0.08	1.56622	1.41774	0.0347268	1
9	11818030	11818200	rs10960270	Alt	C	-0.06	0.390414	0.339685	0.0764267	1.2	0.00949449
9	11818030	11818200	rs10960270	Alt	G	-0.53	13.3413	12.6825	0.0707173	0.86	0.0254053
9	11818030	11818200	rs10960270	Alt	T	-0.26	2.23162	2.03916	0.0955203	1.04	0.562676
9	11818030	11818200	rs10960270	Ref	A	-0.32	5.00779	4.67156	0.0732046	1
9	11819606	11819776	rs10960277	Alt	A	0.1	2.28525	2.08974	0.0350336	0.78	0.0123372
9	11819606	11819776	rs10960277	Alt	C	0.22	7.11987	6.69195	0.0417573	0.85	0.00257294
9	11819606	11819776	rs10960277	Alt	G	0.43	24.663	23.6939	0.0415207	0.99	0.576259
9	11819606	11819776	rs10960277	Ref	T	0.45	28.8595	27.8021	0.0400701	1
9	11821569	11821739	rs10960280	Alt	A	-0.26	8.13386	7.66589	0.0451098	1	0.946537
9	11821569	11821739	rs10960280	Alt	G	-0.05	0.778428	0.690152	0.0395754	1.16	0.0176378
9	11821569	11821739	rs10960280	Alt	T	-0.18	8.90574	8.40626	0.0300357	1.06	0.13061
9	11821569	11821739	rs10960280	Ref	C	-0.26	16.142	15.3894	0.0315438	1
9	11827755	11827925	rs10960292	Alt	C	0.05	0.685971	0.605506	0.0383475	0.92	0.172117
9	11827755	11827925	rs10960292	Ref	T	0.17	5.90306	5.5265	0.0340798	1
9	11848763	11848933	rs10960318	Alt	G	0.07	1.08831	0.975016	0.0390728	1	0.854923
9	11848763	11848933	rs10960318	Alt	T	0.67	50.6758	49.1815	0.0441531	1.51	0.00938272
9	11848763	11848933	rs10960318	Ref	A	0.07	0.98721	0.881958	0.044138	1
9	11863409	11863579	rs10960331	Alt	A	-0.15	1.74513	1.58424	0.0633727	0.94	0.301224
9	11863409	11863579	rs10960331	Alt	G	0.18	3.38974	3.13355	0.0509277	1.18	0.107859
9	11863409	11863579	rs10960331	Alt	T	0.76	65.0415	63.2999	0.0443354	1.76	0.0142339
9	11863409	11863579	rs10960331	Ref	C	-0.06	0.363739	0.315881	0.0733268	1
9	11878902	11879072	rs10960340	Alt	A	-0.22	4.85602	4.52792	0.0501611	0.85	0.0106436
9	11878902	11879072	rs10960340	Alt	T	-0.19	3.67385	3.40186	0.050549	0.87	0.134635
9	11878902	11879072	rs10960340	Ref	C	0.01	0.160599	0.136991	0.0329173	1
9	12144437	12144607	rs10960498	Alt	C	-0.28	8.73914	8.24626	0.0468728	0.79	0.000900709
9	12144437	12144607	rs10960498	Alt	G	0.06	0.867774	0.772212	0.0423773	1.01	0.67951
9	12144437	12144607	rs10960498	Ref	T	0.05	0.516825	0.451909	0.0522587	1
9	12144632	12144802	rs10960499	Alt	A	0.1	2.05776	1.87609	0.0379525	1.02	0.426734
9	12144632	12144802	rs10960499	Alt	G	-0.1	2.15904	1.97107	0.0381245	0.89	0.0333337
9	12144632	12144802	rs10960499	Ref	T	0.07	1.09883	0.984821	0.0413984	1
9	12164987	12165157	rs10960502	Alt	C	-0.28	6.4684	6.06726	0.055683	1.05	0.511865
9	12164987	12165157	rs10960502	Alt	G	0.01	0.124144	0.105416	0.0368936	1.29	0.0709286
9	12164987	12165157	rs10960502	Ref	T	-0.36	6.85189	6.43502	0.0678107	1
9	12193193	12193363	rs10960516	Alt	C	0.22	7.11935	6.69151	0.0403203	1.01	0.297291
9	12193193	12193363	rs10960516	Alt	G	0.26	10.827	10.2572	0.0381259	1.04	0.208496
9	12193193	12193363	rs10960516	Alt	T	0.06	0.684527	0.604283	0.0473467	0.91	0.210216
9	12193193	12193363	rs10960516	Ref	A	0.2	6.30669	5.9118	0.0397097	1
9	7994806	7994976	rs10976710	Alt	A	-0.33	21.3819	20.4888	0.0345808	0.82	0.0136654
9	7994806	7994976	rs10976710	Alt	T	-0.09	1.78801	1.6241	0.0364382	0.97	0.399671
9	7994806	7994976	rs10976710	Ref	C	-0.04	0.375833	0.326679	0.0515767	1
9	7995057	7995227	rs10976711	Alt	C	-0.12	2.95712	2.72455	0.0374956	0.66	0.0034063
9	7995057	7995227	rs10976711	Ref	A	0.48	35.4552	34.27	0.0380989	1
9	7995067	7995237	rs10976712	Alt	A	-0.14	2.39228	2.19092	0.0473784	0.8	0.00546113
9	7995067	7995237	rs10976712	Alt	C	-0.18	2.3054	2.10922	0.0633569	0.78	0.0134382
9	7995067	7995237	rs10976712	Alt	G	0.29	12.8239	12.1848	0.0388731	1.07	0.158427
9	7995067	7995237	rs10976712	Ref	T	0.18	6.12228	5.73595	0.0373933	1
10	30753480	30753650	rs11008222	Alt	A	-0.14	3.75893	3.48252	0.0374898	1.05	0.00105291
10	30753480	30753650	rs11008222	Alt	C	-0.08	1.55549	1.40809	0.0381118	1.09	0.0133182
10	30753480	30753650	rs11008222	Ref	G	-0.21	4.97686	4.64215	0.0477878	1
10	30754063	30754233	rs11008223	Alt	A	-0.26	12.1532	11.5349	0.0358571	0.99	0.495976
10	30754063	30754233	rs11008223	Ref	G	-0.24	10.0897	9.5459	0.0370842	1
10	30759823	30759993	rs11008231	Alt	C	-0.14	3.63236	3.36241	0.0367686	1.17	0.0262807
10	30759823	30759993	rs11008231	Alt	G	-0.38	20.0752	19.2175	0.0411416	0.98	0.649745
10	30759823	30759993	rs11008231	Alt	T	-0.17	5.37315	5.02088	0.0370834	1.14	0.14745
10	30759823	30759993	rs11008231	Ref	A	-0.36	16.8913	16.1181	0.0421306	1
10	30769326	30769496	rs11008240	Alt	G	0.06	1.16128	1.04289	0.0319192	1.1	0.0142025
10	30769326	30769496	rs11008240	Alt	T	-0.21	8.77073	8.27624	0.0352831	0.91	0.0312155
10	30769326	30769496	rs11008240	Ref	C	-0.08	1.68635	1.52946	0.0343814	1
10	20957941	20958111	rs11012419	Alt	T	0.06	0.979174	0.874738	0.0398398	1.03	0.578253
10	20957941	20958111	rs11012419	Ref	C	0.02	0.196029	0.168049	0.0375063	1
10	20964879	20965049	rs11012422	Alt	A	-0.25	6.84683	6.4302	0.0478116	0.93	0.0823204
10	20964879	20965049	rs11012422	Ref	G	-0.14	3.76528	3.48841	0.03703	1
10	20972420	20972590	rs11012427	Alt	G	0.86	44.2378	42.8735	0.0610338	1.03	0.313958
10	20972420	20972590	rs11012427	Ref	A	0.81	10.6279	10.0649	0.121842	1
10	20973467	20973637	rs11012428	Alt	T	0.3	8.40625	7.92903	0.0506955	1.67	0.0105668
10	20973467	20973637	rs11012428	Ref	C	-0.44	15.2397	14.5172	0.054912	1
10	20974167	20974337	rs11012430	Alt	T	-0.21	0.437243	0.381373	0.233929	0.85	0.560864
10	20974167	20974337	rs11012430	Ref	C	0.02	0.094388	0.0796458	0.0899404	1
10	20974433	20974603	rs11012433	Alt	A	-0.22	7.11621	6.68845	0.0414521	0.75	0.0363751
10	20974433	20974603	rs11012433	Ref	G	0.19	6.43103	6.03143	0.0368942	1
10	20976932	20977102	rs11012434	Alt	C	-0.06	0.809316	0.718444	0.0397186	0.84	0.00430395
10	20976932	20977102	rs11012434	Ref	T	0.19	7.26741	6.83414	0.0351408	1
10	20977580	20977750	rs11012436	Alt	A	0.22	6.5439	6.13975	0.0422238	1.13	0.117006
10	20977580	20977750	rs11012436	Ref	G	0.04	0.357068	0.309925	0.0462379	1
10	20977820	20977990	rs11012437	Alt	T	0.02	0.214829	0.184401	0.0326313	1.07	0.0384403
10	20977820	20977990	rs11012437	Ref	C	-0.09	1.30599	1.17667	0.0435906	1
10	20977925	20978095	rs11012438	Alt	A	-0.14	2.35989	2.16052	0.0500935	0.94	0.192073
10	20977925	20978095	rs11012438	Ref	G	-0.05	0.381924	0.332052	0.0597614	1
10	20977929	20978099	rs11012439	Alt	A	0.61	46.3881	44.9744	0.0422887	1.52	0.0236851
10	20977929	20978099	rs11012439	Ref	T	0.01	0.0410305	0.0340477	0.0703507	1
10	20978059	20978229	rs11012440	Alt	C	-0.03	0.359361	0.312035	0.0366861	1.11	0.198834
10	20978059	20978229	rs11012440	Ref	T	-0.18	5.94281	5.56442	0.0373718	1
10	20978518	20978688	rs11012441	Alt	T	-0.15	0.713393	0.630387	0.113702	0.6	0.021778
10	20978518	20978688	rs11012441	Ref	A	0.59	2.95964	2.72691	0.180326	1
10	20978775	20978945	rs11012442	Alt	G	-0.14	3.97692	3.68912	0.0352499	0.96	0.425117
10	20978775	20978945	rs11012442	Ref	A	-0.07	1.40178	1.26534	0.0357174	1
10	20978828	20978998	rs11012443	Alt	A	-0.44	14.0828	13.3987	0.0566636	0.97	0.635427
10	20978828	20978998	rs11012443	Alt	C	-0.23	4.63839	4.32157	0.0546906	1.13	0.185547
10	20978828	20978998	rs11012443	Ref	T	-0.4	8.01098	7.54755	0.0701895	1
10	20979503	20979673	rs11012444	Alt	A	0.52	0.0923067	0.0779432	2.16175	3.05	0.467643
10	20979503	20979673	rs11012444	Ref	G	-1.09	0.294317	0.254225	1.64001	1
10	20979598	20979768	rs11012445	Alt	G	0.48	35.7474	34.5536	0.0380682	0.88	0.0601071
10	20979598	20979768	rs11012445	Ref	A	0.67	51.9514	50.4296	0.0436346	1
10	20980696	20980866	rs11012446	Alt	G	0.52	24.3588	23.3956	0.0502746	1.41	0.00552222
10	20980696	20980866	rs11012446	Alt	T	0.07	0.747057	0.661468	0.0488074	1.03	0.594295
10	20980696	20980866	rs11012446	Ref	A	0.03	0.195381	0.167518	0.0596392	1
10	20980963	20981133	rs11012447	Alt	C	0.13	1.82374	1.65787	0.0520984	0.97	0.485668
10	20980963	20981133	rs11012447	Ref	A	0.17	3.8399	3.55838	0.0440929	1
10	20980985	20981155	rs11012448	Alt	G	-0.36	18.4018	17.5909	0.0405378	0.71	0.0275995
10	20980985	20981155	rs11012448	Alt	T	-0.17	4.67712	4.35812	0.040196	0.81	0.050913
10	20980985	20981155	rs11012448	Ref	A	0.13	1.71959	1.56011	0.0542119	1
10	20981109	20981279	rs11012449	Alt	G	0.09	1.5401	1.39381	0.0389807	1.35	0.0150086
10	20981109	20981279	rs11012449	Ref	A	-0.35	21.0118	20.1313	0.0364976	1
10	20981849	20982019	rs11012450	Alt	C	-0.18	6.75438	6.34132	0.0335087	1.09	0.0904387
10	20981849	20982019	rs11012450	Alt	G	-0.31	10.0502	9.50805	0.0473785	0.99	0.853174
10	20981849	20982019	rs11012450	Ref	A	-0.3	13.9719	13.2911	0.0382423	1
10	20981870	20982040	rs11012451	Alt	C	-0.02	0.25233	0.217395	0.0347958	1.04	0.334473
10	20981870	20982040	rs11012451	Ref	T	-0.08	1.53923	1.39299	0.0346977	1
10	20982930	20983100	rs11012455	Alt	C	-0.19	5.3387	4.98766	0.0413064	1	0.968239
10	20982930	20983100	rs11012455	Alt	T	-0.14	2.79946	2.57515	0.0452378	1.03	0.333271
10	20982930	20983100	rs11012455	Ref	A	-0.19	6.75381	6.34082	0.0358177	1
10	20982973	20983143	rs11012456	Alt	T	-0.25	10.1747	9.62795	0.0377571	0.71	0.00580335
10	20982973	20983143	rs11012456	Ref	C	0.24	12.4706	11.8419	0.0330531	1
10	20983430	20983600	rs11012457	Alt	G	0.51	15.4112	14.6838	0.062922	1.33	0.0130747
10	20983430	20983600	rs11012457	Ref	A	0.1	2.4664	2.26057	0.0338977	1
10	20983704	20983874	rs11012458	Alt	T	0.21	7.5048	7.06122	0.0384022	1.05	0.0814635
10	20983704	20983874	rs11012458	Ref	C	0.14	3.70763	3.43415	0.0371883	1
10	20983878	20984048	rs11012459	Alt	G	-0.24	6.57464	6.16909	0.0459285	0.69	0.00672383
10	20983878	20984048	rs11012459	Ref	A	0.29	9.66832	9.14016	0.0462835	1
10	20985942	20986112	rs11012460	Alt	C	-0.12	2.40641	2.20419	0.0421545	0.97	0.710423
10	20985942	20986112	rs11012460	Alt	G	-0.16	5.29676	4.94749	0.0361387	0.94	0.36363
10	20985942	20986112	rs11012460	Ref	A	-0.08	1.38298	1.24783	0.0372118	1
10	20986313	20986483	rs11012461	Alt	A	-0.37	16.1233	15.3716	0.0441573	0.65	0.00111449
10	20986313	20986483	rs11012461	Ref	G	0.25	12.1611	11.5424	0.0348991	1
10	20986339	20986509	rs11012462	Alt	A	-0.11	1.35379	1.22101	0.0556031	0.89	0.0742748
10	20986339	20986509	rs11012462	Alt	C	-0.31	5.60409	5.24062	0.0653106	0.78	0.0704919
10	20986339	20986509	rs11012462	Ref	T	0.06	0.774978	0.687067	0.0417031	1
10	20987638	20987808	rs11012463	Alt	C	-0.4	12.977	12.3319	0.0539685	0.71	0.037126
10	20987638	20987808	rs11012463	Alt	G	0.38	11.3389	10.7496	0.05487	1.23	0.00353069
10	20987638	20987808	rs11012463	Ref	A	0.08	1.76989	1.60723	0.0347565	1
10	20987769	20987939	rs11012464	Alt	T	0.01	0.0681255	0.0572178	0.0496499	0.54	0.00844662
10	20987769	20987939	rs11012464	Ref	A	0.9	66.5756	64.8062	0.0520488	1
10	20989594	20989764	rs11012465	Alt	C	0.24	9.80842	9.27393	0.0375636	0.97	0.479402
10	20989594	20989764	rs11012465	Ref	G	0.28	13.3475	12.688	0.0367806	1
10	20993924	20994094	rs11012466	Alt	A	-0.27	8.74983	8.25629	0.0450036	0.78	0.00202794
10	20993924	20994094	rs11012466	Ref	T	0.09	1.47084	1.32957	0.0402193	1
10	20994606	20994776	rs11012467	Alt	A	-0.37	12.9343	12.2911	0.050296	0.84	0.0662044
10	20994606	20994776	rs11012467	Ref	G	-0.13	1.95827	1.78354	0.0508049	1
10	20994961	20995131	rs11012468	Alt	G	-0.47	23.2721	22.3368	0.0465328	0.94	0.472133
10	20994961	20995131	rs11012468	Ref	A	-0.39	10.0702	9.52723	0.0593343	1
10	20995425	20995595	rs11012469	Alt	T	0.12	2.65766	2.44156	0.040735	0.89	0.0646228
10	20995425	20995595	rs11012469	Ref	G	0.29	17.2869	16.5052	0.0340831	1
10	20999077	20999247	rs11012472	Alt	A	0.35	12.3722	11.7472	0.0479792	0.99	0.725024
10	20999077	20999247	rs11012472	Ref	G	0.36	11.6303	11.0327	0.05195	1
10	130548751	130548921	rs11017328	Alt	A	0.75	75.2007	73.3146	0.0409294	1.06	0.143639
10	130548751	130548921	rs11017328	Alt	G	0.86	72.9248	71.0638	0.0473989	1.14	0.0496208
10	130548751	130548921	rs11017328	Alt	T	0.71	70.1556	68.3287	0.0398451	1.02	0.173451
10	130548751	130548921	rs11017328	Ref	C	0.67	75.7857	73.8804	0.0364242	1
12	121223726	121223896	rs11065494	Alt	C	0.03	0.534217	0.467524	0.0306723	1.07	0.236018
12	121223726	121223896	rs11065494	Alt	T	0.05	0.908065	0.80899	0.0355419	1.09	0.198873
12	121223726	121223896	rs11065494	Ref	A	-0.07	1.22575	1.10275	0.037329	1
12	121223800	121223970	rs11065495	Alt	A	0.09	1.97006	1.79452	0.0343762	1.27	0.00266647
12	121223800	121223970	rs11065495	Alt	T	-0.01	0.122087	0.103788	0.0391934	1.19	0.0249417
12	121223800	121223970	rs11065495	Ref	C	-0.26	9.49078	8.96845	0.0410784	1
12	121224294	121224464	rs11065496	Alt	A	4.15	38.6055	37.3515	0.31632	0.91	0.00417942
12	121224294	121224464	rs11065496	Ref	G	4.29	42.681	41.3486	0.310606	1
12	121224482	121224652	rs11065497	Alt	C	0.25	6.44315	6.04316	0.049491	1.18	0.122911
12	121224482	121224652	rs11065497	Ref	A	0.02	0.144322	0.122899	0.0495747	1
16	48972848	48973018	rs11076458	Alt	G	-0.15	4.6086	4.2933	0.0359414	0.8	0.00670466
16	48972848	48973018	rs11076458	Ref	A	0.17	4.33475	4.03134	0.0424671	1
17	35244442	35244612	rs11080327	Alt	A	0.7	94.4311	92.251	0.0336616	1.2	0.00321672
17	35244442	35244612	rs11080327	Ref	G	0.43	19.6347	18.7885	0.0465675	1
19	14335190	14335360	rs11085888	Alt	G	0.32	24.6596	23.691	0.031146	0.96	0.386053
19	14335190	14335360	rs11085888	Alt	T	0.23	9.49277	8.97024	0.0358742	0.9	0.129208
19	14335190	14335360	rs11085888	Ref	A	0.38	26.7287	25.7115	0.0346291	1
19	14335473	14335643	rs11085889	Alt	C	-0.19	2.63568	2.42093	0.0611563	0.69	0.0359823
19	14335473	14335643	rs11085889	Ref	T	0.34	21.7007	20.7991	0.0352834	1
4	77905796	77905966	rs11097965	Alt	T	0.22	4.07834	3.78607	0.0564403	1.19	0.0907602
4	77905796	77905966	rs11097965	Ref	G	-0.03	0.254809	0.21951	0.0496795	1
4	77961568	77961738	rs11097980	Alt	T	0.32	10.5148	9.9558	0.0475775	0.96	0.225408
4	77961568	77961738	rs11097980	Ref	C	0.37	24.2231	23.2638	0.0356743	1
4	78008107	78008277	rs11098003	Alt	G	1.02	22.5915	21.6725	0.102815	2.53	0.0195012
4	78008107	78008277	rs11098003	Alt	T	-0.18	1.74026	1.57963	0.0770282	1.1	0.0905772
4	78008107	78008277	rs11098003	Ref	C	-0.32	3.33517	3.08189	0.0910357	1
4	118365189	118365359	rs11098434	Alt	A	0.26	12.3939	11.768	0.0353694	0.84	0.00677453
4	118365189	118365359	rs11098434	Alt	C	0.32	23.1674	22.2337	0.0313096	0.88	0.00898472
4	118365189	118365359	rs11098434	Alt	T	0.51	53.4883	51.9404	0.0327061	1	0.860699
4	118365189	118365359	rs11098434	Ref	G	0.5	51.9403	50.4205	0.0327841	1
4	139876444	139876614	rs11100326	Alt	G	-0.02	0.27581	0.238055	0.0393239	1.16	0.109273
4	139876444	139876614	rs11100326	Ref	A	-0.24	5.94558	5.56705	0.050243	1
12	94160952	94161122	rs11107420	Alt	G	-0.05	0.709593	0.626919	0.0407274	0.76	0.00966718
12	94160952	94161122	rs11107420	Alt	T	0.07	1.26538	1.13913	0.0343337	0.82	0.01184
12	94160952	94161122	rs11107420	Ref	A	0.35	21.8945	20.9867	0.0358552	1
2	29759142	29759312	rs111234509	Alt	C	-0.17	5.3289	4.97854	0.037786	0.91	0.143124
2	29759142	29759312	rs111234509	Ref	T	-0.04	0.563744	0.494196	0.0389512	1
5	23403798	23403968	rs111248471	Alt	CT	0.17	3.99414	3.70556	0.0444944	1.2	0.0347968
5	23403798	23403968	rs111248471	Alt	CTT	0.32	16.5483	15.784	0.0377954	1.32	0.0044135
5	23403798	23403968	rs111248471	Alt	CTTT	0.16	5.03466	4.6973	0.0349952	1.18	0.0107333
5	23403798	23403968	rs111248471	Ref	C	-0.09	1.41496	1.2778	0.0411215	1
10	8526187	8526357	rs111248746	Alt	C	-0.06	0.992316	0.886519	0.0355983	1.05	0.047438
10	8526187	8526357	rs111248746	Ref	G	-0.13	2.75361	2.53185	0.0414733	1
12	121231743	121231913	rs111249465	Alt	G	-0.17	2.10974	1.92463	0.0624569	0.75	0.0916705
12	121231743	121231913	rs111249465	Ref	A	0.25	9.33254	8.81667	0.0394298	1
15	68645878	68646048	rs111249770	Alt	A	0.07	0.898625	0.800661	0.0431886	0.86	0.016588
15	68645878	68646048	rs111249770	Alt	T	-0.23	4.07031	3.77858	0.0594223	0.7	0.0088846
15	68645878	68646048	rs111249770	Ref	G	0.29	15.0615	14.3447	0.0356951	1
10	8531831	8532001	rs111256062	Alt	T	0.28	3.18553	2.94043	0.0819485	1.15	0.207531
10	8531831	8532001	rs111256062	Ref	C	0.07	0.486596	0.424927	0.0753351	1
3	59657066	59657236	rs11130727	Alt	A	-0.01	0.119712	0.101738	0.0464007	0.83	0.0483564
3	59657066	59657236	rs11130727	Alt	C	-0.01	0.0698218	0.0585071	0.0554983	0.83	0.151192
3	59657066	59657236	rs11130727	Ref	T	0.26	12.2502	11.6295	0.0360056	1
3	63491492	63491662	rs11130929	Alt	C	0.21	7.61819	7.17079	0.0374653	1.29	0.0196698
3	63491492	63491662	rs11130929	Alt	G	0.29	18.1654	17.361	0.0332068	1.37	0.0264702
3	63491492	63491662	rs11130929	Ref	A	-0.16	3.73203	3.45717	0.0427603	1
3	63491696	63491866	rs11130931	Alt	A	-0.18	4.2025	3.90457	0.0454795	0.87	0.165145
3	63491696	63491866	rs11130931	Ref	G	0.01	0.127348	0.108259	0.035803	1
3	63491732	63491902	rs11130932	Alt	A	-0.08	0.931588	0.830939	0.0481061	1.09	0.0807659
3	63491732	63491902	rs11130932	Ref	G	-0.2	2.56096	2.3499	0.0651783	1
3	63491986	63492156	rs11130934	Alt	C	0.14	4.94237	4.60983	0.0311118	1.16	0.0123793
3	63491986	63492156	rs11130934	Alt	G	-0.14	4.54176	4.22979	0.034013	0.96	0.0239335
3	63491986	63492156	rs11130934	Ref	A	-0.08	2.03281	1.85295	0.0309459	1
17	11320584	11320754	rs111324185	Alt	C	0.36	12.9783	12.333	0.0478477	0.93	0.00788996
17	11320584	11320754	rs111324185	Alt	G	0.11	2.63111	2.41662	0.0351924	0.79	0.0244746
17	11320584	11320754	rs111324185	Ref	A	0.45	21.2453	20.3564	0.0471976	1
X	81316728	81316898	rs111342912	Alt	A	-0.13	3.74073	3.4653	0.0346738	1.13	0.0595495
X	81316728	81316898	rs111342912	Ref	G	-0.31	14.7715	14.0648	0.0384392	1
12	69945221	69945391	rs111348951	Alt	AG	-0.09	1.34133	1.20942	0.0449807	1.1	0.139899
12	69945221	69945391	rs111348951	Ref	A	-0.23	6.84584	6.42929	0.0430317	1
X	81052074	81052244	rs111356468	Alt	T	-0.21	4.95786	4.62446	0.0481659	0.84	0.124877
X	81052074	81052244	rs111356468	Ref	G	0.04	0.441681	0.385186	0.0402417	1
4	118359273	118359443	rs1113677	Alt	C	0.07	1.56414	1.41589	0.0336903	0.65	0.00283473
4	118359273	118359443	rs1113677	Alt	G	0.74	90.439	88.311	0.0366054	1.03	0.14263
4	118359273	118359443	rs1113677	Ref	T	0.69	101.606	99.3275	0.0322169	1
10	44578774	44578944	rs111415059	Alt	A	-0.1	1.7459	1.58492	0.0436516	1.13	0.179125
10	44578774	44578944	rs111415059	Alt	T	0.17	3.38362	3.12782	0.0472267	1.36	0.0328563
10	44578774	44578944	rs111415059	Ref	G	-0.28	8.81482	8.3188	0.0463608	1
10	52505465	52505635	rs111442290	Alt	A	0.68	29.5893	28.5141	0.0595287	1.43	0.0355054
10	52505465	52505635	rs111442290	Ref	G	0.17	5.15263	4.8104	0.0369088	1
3	114196978	114197148	rs111538459	Alt	C	0.3	8.95142	8.4506	0.0486805	1.03	0.349874
3	114196978	114197148	rs111538459	Ref	T	0.25	5.07479	4.73597	0.056391	1
X	81122285	81122455	rs111539804	Alt	G	-0.23	7.69103	7.24123	0.0408137	0.87	0.0177922
X	81122285	81122455	rs111539804	Ref	C	-0.03	0.490131	0.427899	0.033044	1
6	158301798	158301968	rs111541197	Alt	TAAA	-0.21	8.00159	7.53853	0.0367407	0.81	0.0209822
6	158301798	158301968	rs111541197	Alt	TATAA	-0.15	6.32666	5.93117	0.0305298	0.84	0.0091394
6	158301798	158301968	rs111541197	Ref	T	0.1	1.88084	1.71102	0.0408309	1
4	167924491	167924661	rs111549532	Alt	C	-0.18	5.4659	5.10984	0.0379474	0.85	0.00905174
4	167924491	167924661	rs111549532	Alt	G	0.42	26.6231	25.6085	0.0391694	1.29	0.0188343
4	167924491	167924661	rs111549532	Ref	T	0.06	0.5996	0.526708	0.0495643	1
X	80722308	80722478	rs111563543	Alt	A	0.18	7.25996	6.82727	0.0323991	1.21	0.0154288
X	80722308	80722478	rs111563543	Ref	G	-0.09	2.28889	2.09318	0.0332498	1
X	80882389	80882559	rs111578962	Alt	A	-0.33	3.82767	3.5472	0.0870331	1.13	0.0221054
X	80882389	80882559	rs111578962	Ref	G	-0.51	7.0845	6.65812	0.0954401	1
14	88079404	88079574	rs11159838	Alt	C	0.31	15.7035	14.9651	0.0379086	1.12	0.0354329
14	88079404	88079574	rs11159838	Alt	T	0.08	1.86644	1.69748	0.0313771	0.95	0.335191
14	88079404	88079574	rs11159838	Ref	G	0.15	4.16776	3.87116	0.0374904	1
14	88085980	88086150	rs11159839	Alt	G	0.44	26.778	25.7592	0.0404424	1.38	0.0073931
14	88085980	88086150	rs11159839	Alt	T	0.11	2.90916	2.67951	0.0347797	1.1	0.24951
14	88085980	88086150	rs11159839	Ref	A	-0.02	0.257445	0.22198	0.0395178	1
14	88090096	88090266	rs11159840	Alt	A	-0.07	0.905054	0.806401	0.0448029	0.94	0.138014
14	88090096	88090266	rs11159840	Alt	T	0.18	6.17991	5.7909	0.0366669	1.12	0.0151261
14	88090096	88090266	rs11159840	Ref	G	0.01	0.126921	0.10794	0.0405854	1
14	96316886	96317056	rs11160331	Alt	A	-0.22	12.4842	11.8548	0.0303112	1	0.981897
14	96316886	96317056	rs11160331	Alt	T	0.14	3.44388	3.18476	0.0401273	1.29	0.05026
14	96316886	96317056	rs11160331	Ref	G	-0.22	5.13407	4.79264	0.0488034	1
14	96339556	96339726	rs11160332	Alt	G	0.38	23.6008	22.6562	0.0374969	1.42	0.0150095
14	96339556	96339726	rs11160332	Ref	A	-0.12	2.16753	1.97904	0.0446063	1
14	96354974	96355144	rs11160333	Alt	A	-0.09	1.89682	1.72569	0.0369741	0.88	0.0420054
14	96354974	96355144	rs11160333	Alt	T	0.12	3.2751	3.02503	0.0344813	1.02	0.064161
14	96354974	96355144	rs11160333	Ref	C	0.09	2.13095	1.94472	0.0351665	1
16	81149132	81149302	rs111607652	Alt	TA	0.5	25.3332	24.3467	0.047532	1.16	0.845704
16	81149132	81149302	rs111607652	Alt	TCA	0.35	16.2706	15.5139	0.0422561	1.05	0.827634
16	81149132	81149302	rs111607652	Alt	TG	0.12	2.42165	2.21827	0.0420022	0.89	0.493595
16	81149132	81149302	rs111607652	Alt	TGTTTG	0.48	19.1862	18.3533	0.0530092	1.15	0.890447
16	81149132	81149302	rs111607652	Ref	T	0.28	0.141311	0.120273	0.794965	1
X	81186579	81186749	rs111655365	Alt	C	0.41	17.7354	16.9431	0.046314	1.16	0.0674338
X	81186579	81186749	rs111655365	Ref	T	0.19	6.6299	6.22187	0.0367997	1
4	77878725	77878895	rs111665483	Alt	G	0.23	10.6487	10.0849	0.0345584	1.22	0.0210834
4	77878725	77878895	rs111665483	Alt	T	-0.17	4.60438	4.28933	0.0399655	0.92	0.012434
4	77878725	77878895	rs111665483	Ref	C	-0.05	0.868547	0.772947	0.0359516	1
20	34950833	34951003	rs11167248	Alt	T	0.58	54.1609	52.5975	0.0373514	1.46	0.00240564
20	34950833	34951003	rs11167248	Ref	G	0.04	0.488507	0.426627	0.0367875	1
20	35015061	35015231	rs11167252	Alt	G	0.11	1.40006	1.26374	0.0543193	1.14	0.028244
20	35015061	35015231	rs11167252	Ref	GC	-0.08	1.0215	0.913475	0.0487568	1
20	35026561	35026731	rs11167253	Alt	C	-0.25	11.1769	10.594	0.0369983	0.94	0.276305
20	35026561	35026731	rs11167253	Ref	T	-0.17	4.1912	3.89387	0.0424154	1
2	29708014	29708184	rs111695969	Alt	A	0.23	10.817	10.2476	0.034012	1.23	0.00166257
2	29708014	29708184	rs111695969	Ref	G	-0.06	1.39065	1.255	0.0313189	1
4	167924902	167925072	rs111706332	Alt	A	-0.23	6.6214	6.21422	0.0450417	0.98	0.000850838
4	167924902	167925072	rs111706332	Alt	C	-0.03	0.251788	0.216992	0.0560681	1.12	0.236221
4	167924902	167925072	rs111706332	Ref	G	-0.2	5.4035	5.04944	0.042767	1
12	69943803	69943973	rs11177982	Alt	G	0.06	0.69338	0.612217	0.0488008	0.85	0.0670342
12	69943803	69943973	rs11177982	Alt	T	0.19	7.88392	7.42631	0.0328474	0.93	0.0357432
12	69943803	69943973	rs11177982	Ref	C	0.29	17.5192	16.7316	0.033791	1
12	69953201	69953371	rs11177993	Alt	G	0.07	0.726222	0.641995	0.0548912	1.14	0.128117
12	69953201	69953371	rs11177993	Ref	A	-0.12	3.5366	3.27184	0.0333061	1
12	69958059	69958229	rs11177996	Alt	G	-0.07	0.996066	0.889958	0.0398002	1.41	0.017565
12	69958059	69958229	rs11177996	Ref	A	-0.56	9.40955	8.89056	0.0892347	1
12	69962690	69962860	rs11177999	Alt	C	0.98	58.8947	57.26	0.0601858	1.98	0.00959811
12	69962690	69962860	rs11177999	Alt	G	-0.02	0.0784336	0.0657386	0.0842822	0.99	0.859243
12	69962690	69962860	rs11177999	Ref	A	-0.01	0.0400101	0.0332753	0.0704877	1
12	69972929	69973099	rs11178010	Alt	T	0.14	2.05077	1.86938	0.0539628	0.77	0.0121352
12	69972929	69973099	rs11178010	Ref	C	0.52	35.1206	33.9419	0.0415741	1
12	69982296	69982466	rs11178016	Alt	A	0.41	36.7123	35.498	0.0324322	1.16	0.00198248
12	69982296	69982466	rs11178016	Alt	T	-0.06	1.12769	1.01138	0.0310296	0.84	0.0525228
12	69982296	69982466	rs11178016	Ref	C	0.2	6.17589	5.78725	0.0402318	1
15	68723618	68723788	rs111789763	Alt	C	0.29	18.4288	17.6163	0.0318834	1.01	0.659932
15	68723618	68723788	rs111789763	Ref	T	0.27	15.8899	15.1445	0.0326615	1
6	9327620	9327790	rs111792270	Alt	A	-0.34	13.1632	12.5103	0.0453511	0.97	0.237617
6	9327620	9327790	rs111792270	Alt	T	-0.24	11.1983	10.6147	0.034611	1.04	0.175943
6	9327620	9327790	rs111792270	Ref	G	-0.29	10.1353	9.58991	0.0445989	1
X	81278886	81279056	rs111816431	Alt	G	-0.36	8.34255	7.86781	0.061218	0.86	0.229168
X	81278886	81279056	rs111816431	Ref	T	-0.15	1.89466	1.72376	0.0598953	1
4	167924854	167925024	rs111908579	Alt	A	-0.32	5.52998	5.17009	0.0692381	1.01	0.951592
4	167924854	167925024	rs111908579	Alt	G	0.25	9.93196	9.39317	0.038156	1.49	0.0137518
4	167924854	167925024	rs111908579	Alt	T	-0.03	0.272386	0.23503	0.0438042	1.24	0.0268279
4	167924854	167925024	rs111908579	Ref	C	-0.33	9.7955	9.26174	0.0519193	1
10	8519631	8519801	rs111923715	Alt	G	0.26	13.1871	12.5338	0.0343283	1.33	0.000965586
10	8519631	8519801	rs111923715	Alt	T	-0.15	3.18389	2.939	0.0431047	1.01	0.805071
10	8519631	8519801	rs111923715	Ref	A	-0.16	5.68844	5.32122	0.0327391	1
5	56724660	56724830	rs111934512	Alt	C	0	0.00229079	0.00192445	0.0437595	0.61	0.000169239
5	56724660	56724830	rs111934512	Ref	T	0.71	50.5069	49.0163	0.0470916	1
5	56712318	56712488	rs111944656	Alt	A	0.74	4.97412	4.6396	0.167122	1.35	0.0233718
5	56712318	56712488	rs111944656	Alt	T	0.43	2.50089	2.29295	0.1456	1.09	0.0502111
5	56712318	56712488	rs111944656	Ref	G	0.31	0.990262	0.884622	0.186961	1
10	114285107	114285277	rs11196680	Alt	A	-0.16	6.42856	6.02918	0.0310412	0.97	0.477372
10	114285107	114285277	rs11196680	Ref	C	-0.12	3.66092	3.38984	0.0316941	1
10	114299884	114300054	rs11196687	Alt	A	-0.36	20.5931	19.7238	0.0382854	1.07	0.0263056
10	114299884	114300054	rs11196687	Ref	G	-0.47	28.9969	27.9357	0.0410881	1
X	81141147	81141317	rs111967521	Alt	A	-0.24	9.66115	9.1332	0.0372581	0.83	0.0593168
X	81141147	81141317	rs111967521	Alt	T	-0.34	20.7331	19.861	0.0358116	0.77	0.0029146
X	81141147	81141317	rs111967521	Ref	G	0.03	0.51243	0.447903	0.0333672	1
4	77917779	77917949	rs112007582	Alt	T	1	5.87398	5.49843	0.207039	1.02	0.48474
4	77917779	77917949	rs112007582	Ref	C	0.97	6.43628	6.03644	0.190589	1
4	167913457	167913627	rs112014751	Alt	G	0.11	0.407489	0.355076	0.131069	0.82	0.0367245
4	167913457	167913627	rs112014751	Alt	T	0	0.00283055	0.00231148	0.190563	0.76	0.00533631
4	167913457	167913627	rs112014751	Ref	C	0.39	1.29696	1.16834	0.199703	1
5	56731679	56731849	rs112046175	Alt	T	0.03	0.482566	0.421283	0.0335677	1.04	0.159087
5	56731679	56731849	rs112046175	Ref	C	-0.03	0.365613	0.317516	0.0354876	1
1	150563788	150563958	rs11204665	Alt	G	0.24	12.0465	11.4326	0.0333463	1.26	0.0865833
1	150563788	150563958	rs11204665	Ref	A	-0.1	1.87249	1.70294	0.0406077	1
1	150597407	150597577	rs11204674	Alt	A	0.11	2.4318	2.22783	0.0388969	1.14	0.197838
1	150597407	150597577	rs11204674	Alt	C	-0.01	0.176166	0.150231	0.033753	1.05	0.381704
1	150597407	150597577	rs11204674	Ref	T	-0.08	0.790684	0.701464	0.0585612	1
1	150669598	150669768	rs11204689	Alt	T	4.95	42.3309	41.0063	0.359776	0.5	0.028625
1	150669598	150669768	rs11204689	Ref	C	5.94	59.3037	57.6569	0.36318	1
1	150688141	150688311	rs11204700	Alt	A	-0.23	3.74402	3.46847	0.0601212	1	0.870406
1	150688141	150688311	rs11204700	Alt	T	-0.23	5.18249	4.83838	0.0514429	1	0.886789
1	150688141	150688311	rs11204700	Ref	C	-0.22	4.04821	3.75731	0.0573934	1
1	150723439	150723609	rs11204714	Alt	C	0.43	39.7884	38.5136	0.0324459	1.41	0.00669555
1	150723439	150723609	rs11204714	Ref	A	-0.06	1.1273	1.01102	0.0334683	1
1	150723530	150723700	rs11204715	Alt	T	-0.15	2.61999	2.40635	0.0500325	0.95	0.433117
1	150723530	150723700	rs11204715	Ref	C	-0.08	1.5824	1.43281	0.0381742	1
1	150787418	150787588	rs11204727	Alt	T	0.48	23.2933	22.3578	0.0476861	0.76	0.0235506
1	150787418	150787588	rs11204727	Ref	G	0.88	60.2092	58.5445	0.0534995	1
X	80438494	80438664	rs112062503	Alt	A	0.48	35.8485	34.6519	0.0378063	1.15	0.0228079
X	80438494	80438664	rs112062503	Ref	G	0.27	9.84621	9.31089	0.0421543	1
10	8545717	8545887	rs112069784	Alt	C	-0.23	8.75692	8.26281	0.0377644	0.8	0.000698188
10	8545717	8545887	rs112069784	Alt	T	0.24	13.296	12.6394	0.0319044	1.11	0.0725568
10	8545717	8545887	rs112069784	Ref	G	0.09	2.01183	1.83349	0.0360412	1
2	157936960	157937130	rs112083280	Alt	A	0.5	21.012	20.1313	0.0518367	0.86	0.00119815
2	157936960	157937130	rs112083280	Ref	T	0.71	65.9872	64.2301	0.0412079	1
4	4635912	4636082	rs112105152	Alt	A	0	0.036635	0.0304267	0.038186	0.88	0.0158138
4	4635912	4636082	rs112105152	Alt	C	0.14	4.62985	4.31342	0.0342795	0.97	0.377881
4	4635912	4636082	rs112105152	Alt	T	0.27	12.9704	12.3254	0.0361896	1.06	0.256889
4	4635912	4636082	rs112105152	Ref	G	0.19	8.02773	7.5635	0.0327898	1
1	42028877	42029047	rs11210563	Alt	A	-0.34	13.3033	12.6461	0.0446111	0.87	0.0333444
1	42028877	42029047	rs11210563	Alt	C	-0.16	6.19757	5.80774	0.0317555	0.99	0.634185
1	42028877	42029047	rs11210563	Alt	T	-0.21	9.47045	8.94944	0.032886	0.96	0.111547
1	42028877	42029047	rs11210563	Ref	G	-0.14	4.1123	3.81889	0.0362261	1
2	4898092	4898262	rs112111156	Alt	A	0.23	9.25789	8.746	0.0366523	1.25	0.0168554
2	4898092	4898262	rs112111156	Ref	AATGTGTGT	-0.09	1.97168	1.796	0.0349876	1
3	114199511	114199681	rs112116223	Alt	C	0.25	8.78544	8.29057	0.0418895	0.99	0.82278
3	114199511	114199681	rs112116223	Ref	T	0.26	13.8133	13.1386	0.0342915	1
5	43090111	43090281	rs112126308	Alt	T	-0.13	1.56007	1.41224	0.0571069	0.83	0.0989377
5	43090111	43090281	rs112126308	Ref	C	0.15	1.26197	1.13593	0.0757554	1
X	80684793	80684963	rs112186701	Alt	G	-0.01	0.044545	0.0370658	0.0420342	1.03	0.275718
X	80684793	80684963	rs112186701	Alt	T	-0.07	1.07954	0.967071	0.0389389	0.99	0.891494
X	80684793	80684963	rs112186701	Ref	C	-0.05	0.679709	0.600051	0.0401024	1
4	167914265	167914435	rs112189726	Alt	A	-0.24	10.1973	9.64954	0.0372187	1.05	0.252144
4	167914265	167914435	rs112189726	Ref	G	-0.31	8.56192	8.07825	0.0519671	1
5	56712329	56712499	rs112191071	Alt	A	0.11	0.44595	0.388655	0.114945	0.59	0.0232803
5	56712329	56712499	rs112191071	Alt	C	0.08	0.766605	0.679442	0.0615587	0.58	0.027981
5	56712329	56712499	rs112191071	Ref	G	0.87	9.98322	9.44316	0.134947	1
2	157942054	157942224	rs112196616	Alt	G	0.35	13.3926	12.7309	0.0461684	1.16	0.0628323
2	157942054	157942224	rs112196616	Alt	T	0.38	33.1018	31.9614	0.0314201	1.18	0.00509509
2	157942054	157942224	rs112196616	Ref	C	0.14	4.29511	3.99366	0.0341763	1
4	77849024	77849194	rs112208963	Alt	T	0.1	2.26205	2.06801	0.0368782	0.88	0.0103573
4	77849024	77849194	rs112208963	Ref	C	0.29	18.1597	17.3557	0.0325856	1
X	81387062	81387232	rs112241031	Alt	A	-0.01	0.079596	0.0667123	0.042693	0.97	0.630313
X	81387062	81387232	rs112241031	Ref	T	0.03	0.215011	0.18455	0.0634194	1
5	43100018	43100188	rs1122510	Alt	G	0.18	7.0123	6.58933	0.0336415	1.53	0.00294982
5	43100018	43100188	rs1122510	Ref	A	-0.43	19.0553	18.2261	0.0472882	1
5	51872384	51872554	rs112258524	Alt	G	0.06	1.4276	1.28931	0.0306938	1.36	0.0144854
5	51872384	51872554	rs112258524	Ref	A	-0.38	24.8822	23.907	0.0361841	1
15	68721049	68721219	rs112259028	Alt	A	0.57	44.6416	43.2679	0.0404772	1.23	0.00058627
15	68721049	68721219	rs112259028	Alt	C	0.26	7.80306	7.34902	0.0451652	0.99	0.46499
15	68721049	68721219	rs112259028	Alt	T	-0.03	0.278821	0.240632	0.0505834	0.81	0.012281
15	68721049	68721219	rs112259028	Ref	G	0.27	9.61227	9.08606	0.0430016	1
11	60509252	60509422	rs11230348	Alt	A	-0.2	8.13615	7.66799	0.0349941	0.89	0.04088
11	60509252	60509422	rs11230348	Alt	C	-0.06	1.16371	1.04515	0.0355418	0.98	0.188662
11	60509252	60509422	rs11230348	Alt	G	0.14	5.25365	4.90636	0.0305166	1.13	0.0622573
11	60509252	60509422	rs11230348	Ref	T	-0.04	0.452231	0.394065	0.0387477	1
15	68692478	68692648	rs112310437	Alt	A	0.4	22.0842	21.1738	0.0403669	1.44	0.0547493
15	68692478	68692648	rs112310437	Alt	G	-0.1	2.16867	1.98013	0.0369257	1.02	0.663393
15	68692478	68692648	rs112310437	Alt	T	0.27	15.3405	14.6152	0.0335105	1.32	0.0065282
15	68692478	68692648	rs112310437	Ref	C	-0.13	2.09786	1.91322	0.0489904	1
11	63033982	63034152	rs11231311	Alt	A	1.3	51.8565	50.3397	0.0850205	0.93	0.0279628
11	63033982	63034152	rs11231311	Ref	G	1.4	81.5849	79.593	0.0730305	1
11	63037990	63038160	rs11231314	Alt	T	-0.16	5.05958	4.72109	0.0353925	0.86	0.0117674
11	63037990	63038160	rs11231314	Ref	A	0.07	0.872845	0.776903	0.0441833	1
11	63037994	63038164	rs11231315	Alt	A	-0.06	0.706874	0.624532	0.0426484	0.76	0.00462081
11	63037994	63038164	rs11231315	Ref	G	0.33	21.7998	20.895	0.0341756	1
11	63041499	63041669	rs11231319	Alt	A	-0.34	5.33593	4.98503	0.0752458	0.78	0.0121391
11	63041499	63041669	rs11231319	Ref	G	0.02	0.120295	0.102257	0.0552452	1
11	63046677	63046847	rs11231322	Alt	T	-0.06	1.08853	0.975158	0.0360495	0.86	0.00720529
11	63046677	63046847	rs11231322	Ref	C	0.15	4.08706	3.79449	0.0382518	1
11	63046756	63046926	rs11231323	Alt	T	1.21	179.823	176.67	0.042249	0.92	0.108257
11	63046756	63046926	rs11231323	Ref	C	1.34	99.2927	97.0425	0.0629542	1
11	63079795	63079965	rs11231338	Alt	A	-0.08	1.83112	1.66441	0.032938	0.98	0.054063
11	63079795	63079965	rs11231338	Alt	T	-0.13	3.45106	3.19139	0.037004	0.94	0.174314
11	63079795	63079965	rs11231338	Ref	G	-0.05	0.899682	0.801526	0.0324854	1
11	63081107	63081277	rs11231343	Alt	C	-0.15	5.47066	5.11418	0.0324416	0.91	0.102954
11	63081107	63081277	rs11231343	Alt	G	-0.12	2.50862	2.30004	0.0390053	0.93	0.347842
11	63081107	63081277	rs11231343	Ref	A	-0.01	0.110901	0.0941332	0.048174	1
11	63087554	63087724	rs11231347	Alt	T	0.05	0.951627	0.849359	0.0317829	0.92	0.016213
11	63087554	63087724	rs11231347	Ref	C	0.17	6.70101	6.28976	0.0321615	1
11	63095569	63095739	rs11231351	Alt	G	-0.21	4.55849	4.24583	0.0506411	0.96	0.33156
11	63095569	63095739	rs11231351	Alt	T	-0.12	2.6858	2.46794	0.0375992	1.02	0.552607
11	63095569	63095739	rs11231351	Ref	C	-0.15	3.08167	2.84269	0.0451909	1
11	63096338	63096508	rs11231352	Alt	G	-0.15	3.25444	3.00583	0.0421861	0.72	0.00617652
11	63096338	63096508	rs11231352	Alt	T	0.45	42.8226	41.485	0.0323995	1.08	0.0693999
11	63096338	63096508	rs11231352	Ref	A	0.34	13.6887	13.0177	0.0439226	1
11	63107685	63107855	rs11231357	Alt	A	-0.26	6.55743	6.15259	0.051037	0.86	0.0662871
11	63107685	63107855	rs11231357	Alt	T	0.12	2.40244	2.20051	0.0424212	1.12	0.154514
11	63107685	63107855	rs11231357	Ref	C	-0.04	0.449364	0.391651	0.0440078	1
11	63111674	63111844	rs11231360	Alt	A	-0.14	3.94852	3.66213	0.0368522	0.7	0.00187901
11	63111674	63111844	rs11231360	Alt	C	0.04	0.545623	0.477933	0.0368571	0.79	0.00774455
11	63111674	63111844	rs11231360	Alt	T	0.31	12.6489	12.0147	0.0419093	0.95	0.173851
11	63111674	63111844	rs11231360	Ref	G	0.38	15.6256	14.8901	0.0460073	1
11	63112664	63112834	rs11231365	Alt	A	-0.33	18.4136	17.6019	0.0365251	0.79	5.7031e-05
11	63112664	63112834	rs11231365	Alt	C	-0.33	5.88878	5.51273	0.068554	0.79	0.0242649
11	63112664	63112834	rs11231365	Alt	G	0.18	7.4017	6.96343	0.0325691	1.12	0.0112
11	63112664	63112834	rs11231365	Ref	T	0.01	0.153405	0.130666	0.0368621	1
11	63120246	63120416	rs11231370	Alt	C	0.18	5.48838	5.13064	0.0388499	1.06	0.308226
11	63120246	63120416	rs11231370	Alt	G	0.37	16.5687	15.8036	0.0435301	1.21	0.0305016
11	63120246	63120416	rs11231370	Alt	T	0.07	1.31806	1.18768	0.0362593	0.99	0.436202
11	63120246	63120416	rs11231370	Ref	A	0.09	2.47677	2.26995	0.0317062	1
11	63120362	63120532	rs11231371	Alt	C	-0.24	3.30036	3.04877	0.0687443	1.01	0.831495
11	63120362	63120532	rs11231371	Alt	G	-0.14	3.41705	3.15932	0.0387485	1.08	0.012889
11	63120362	63120532	rs11231371	Alt	T	0.64	40.691	39.3992	0.0473739	1.86	0.00719021
11	63120362	63120532	rs11231371	Ref	A	-0.25	8.60126	8.11592	0.0427031	1
11	63121097	63121267	rs11231373	Alt	C	-0.27	6.98674	6.56498	0.0499324	1.1	0.057152
11	63121097	63121267	rs11231373	Ref	A	-0.4	18.1376	17.335	0.0450076	1
11	63121304	63121474	rs11231374	Alt	A	0.1	1.57665	1.42757	0.0433095	1.04	0.670937
11	63121304	63121474	rs11231374	Ref	G	0.04	0.390144	0.339517	0.0522075	1
11	63123741	63123911	rs11231375	Alt	A	-0.17	4.32967	4.0265	0.0411308	1.06	0.337431
11	63123741	63123911	rs11231375	Alt	C	0.64	41.8574	40.5449	0.0469709	1.86	0.00843964
11	63123741	63123911	rs11231375	Alt	G	0.65	41.0063	39.7091	0.0479462	1.86	0.00289166
11	63123741	63123911	rs11231375	Ref	T	-0.25	6.27862	5.88548	0.0496424	1
11	63137378	63137548	rs11231379	Alt	G	-0.17	6.68369	6.27339	0.0328624	0.71	0.00131123
11	63137378	63137548	rs11231379	Ref	C	0.33	11.1059	10.5253	0.0484648	1
11	63139991	63140161	rs11231380	Alt	C	0.13	1.63928	1.4858	0.0573383	0.95	0.371844
11	63139991	63140161	rs11231380	Alt	G	0.05	0.512855	0.448256	0.0478821	0.9	0.123777
11	63139991	63140161	rs11231380	Ref	T	0.2	5.55738	5.19587	0.0428585	1
2	29759961	29760131	rs112323556	Alt	A	0.09	2.17787	1.98869	0.0336347	0.97	0.585309
2	29759961	29760131	rs112323556	Ref	G	0.13	2.67836	2.46095	0.0427194	1
6	9322991	9323161	rs112329101	Alt	G	-0.23	2.09652	1.91206	0.085171	0.93	0.123618
6	9322991	9323161	rs112329101	Alt	T	-0.26	1.38961	1.25405	0.126171	0.91	0.115771
6	9322991	9323161	rs112329101	Ref	A	-0.12	1.08538	0.972491	0.0703891	1
3	114180351	114180521	rs112329502	Alt	A	-0.07	0.247908	0.213601	0.120799	1.08	0.150813
3	114180351	114180521	rs112329502	Ref	G	-0.19	1.38588	1.25057	0.0906659	1
12	121225357	121225527	rs112371853	Alt	A	1.5	151.02	148.122	0.0572263	0.93	0.0353322
12	121225357	121225527	rs112371853	Alt	C	1.59	97.5581	95.3493	0.0753486	0.99	0.39508
12	121225357	121225527	rs112371853	Ref	G	1.6	110.584	108.202	0.0715687	1
6	44156154	44156324	rs112381273	Alt	G	0.05	0.866299	0.770965	0.0314122	1.12	0.0543193
6	44156154	44156324	rs112381273	Ref	A	-0.12	2.22373	2.03179	0.0423356	1
10	44538392	44538562	rs11239119	Alt	A	-0.01	0.0688304	0.0577349	0.0447154	0.91	0.0632764
10	44538392	44538562	rs11239119	Ref	G	0.13	2.5057	2.29726	0.0453644	1
10	44621245	44621415	rs11239171	Alt	C	0.75	36.5477	35.3375	0.058992	1	0.865245
10	44621245	44621415	rs11239171	Alt	G	0.74	48.8415	47.3837	0.050194	0.99	0.781962
10	44621245	44621415	rs11239171	Ref	A	0.76	52.3444	50.8143	0.049262	1
1	204878281	204878451	rs11240298	Alt	A	-0.15	3.17571	2.9312	0.0444286	0.83	0.00110757
1	204878281	204878451	rs11240298	Ref	G	0.11	2.3328	2.13479	0.0393785	1
1	204878606	204878776	rs11240299	Alt	A	-0.26	11.3847	10.7942	0.037213	0.99	0.618499
1	204878606	204878776	rs11240299	Ref	G	-0.24	7.6431	7.19476	0.0438004	1
1	204879105	204879275	rs11240300	Alt	G	0.25	3.44748	3.18809	0.0697281	0.88	0.106893
1	204879105	204879275	rs11240300	Ref	A	0.43	15.2498	14.5271	0.0526562	1
1	204880706	204880876	rs11240304	Alt	G	0.22	8.13564	7.66758	0.0387875	1.14	0.188915
1	204880706	204880876	rs11240304	Alt	T	0.07	0.935915	0.834766	0.0454609	1.03	0.918895
1	204880706	204880876	rs11240304	Ref	C	0.03	0.35325	0.306481	0.0396145	1
1	204886826	204886996	rs11240305	Alt	T	-0.33	14.2746	13.5828	0.0421136	0.96	0.64555
1	204886826	204886996	rs11240305	Ref	C	-0.27	5.52324	5.1639	0.0568555	1
5	104568749	104568919	rs11242521	Alt	C	-0.02	0.298955	0.257833	0.0363341	0.71	0.0344234
5	104568749	104568919	rs11242521	Ref	A	0.48	42.7979	41.4616	0.0345286	1
5	104569128	104569298	rs11242522	Alt	C	0.42	37.7908	36.5566	0.0325646	0.9	0.0219353
5	104569128	104569298	rs11242522	Ref	T	0.58	41.1274	39.8272	0.0427973	1
5	104569239	104569409	rs11242523	Alt	A	0.03	0.355531	0.308544	0.0409711	1.12	0.179425
5	104569239	104569409	rs11242523	Alt	C	0.28	8.64329	8.15514	0.0462405	1.33	0.0194769
5	104569239	104569409	rs11242523	Alt	G	0.51	28.9807	27.9205	0.044612	1.56	0.00370156
5	104569239	104569409	rs11242523	Ref	T	-0.13	2.30895	2.11252	0.0474089	1
4	167924501	167924671	rs112428840	Alt	G	0.12	2.84985	2.62303	0.0377324	1.19	0.0141521
4	167924501	167924671	rs112428840	Alt	T	-0.1	2.45365	2.2487	0.0346879	1.02	0.513607
4	167924501	167924671	rs112428840	Ref	C	-0.13	4.15184	3.85591	0.0338861	1
6	31396455	31396625	rs112436252	Alt	T	0.34	21.3657	20.4727	0.0352592	0.94	0.150251
6	31396455	31396625	rs112436252	Ref	TA	0.42	15.5466	14.8145	0.0517902	1
9	131055651	131055821	rs11244263	Alt	T	0.46	41.8611	40.5479	0.0333266	1.15	0.0448955
9	131055651	131055821	rs11244263	Ref	C	0.25	13.3457	12.6865	0.0334191	1
5	43031161	43031331	rs112463474	Alt	C	0	0.0123849	0.0101515	0.0313978	1	0.886553
5	43031161	43031331	rs112463474	Alt	T	0.33	16.1693	15.416	0.03969	1.26	0.00955631
5	43031161	43031331	rs112463474	Ref	G	0	0.0238236	0.0201449	0.0362038	1
6	11939200	11939370	rs112469668	Alt	G	0.1	2.66473	2.44803	0.0314418	0.96	0.00195139
6	11939200	11939370	rs112469668	Alt	T	-0.02	0.337484	0.292073	0.0322663	0.89	0.0103454
6	11939200	11939370	rs112469668	Ref	C	0.15	5.72524	5.35609	0.0317679	1
8	105520150	105520320	rs112472681	Alt	C	-0.15	4.94095	4.60848	0.0337482	1.03	0.400109
8	105520150	105520320	rs112472681	Alt	CAA	-0.02	0.241506	0.20809	0.0355132	1.13	0.0876201
8	105520150	105520320	rs112472681	Alt	CAAA	-0.21	5.5325	5.17232	0.0446668	0.99	0.668531
8	105520150	105520320	rs112472681	Ref	CA	-0.19	5.73077	5.36105	0.040883	1
4	4635766	4635936	rs112475869	Alt	G	0.21	5.10939	4.76937	0.0477705	0.76	0.0028049
4	4635766	4635936	rs112475869	Ref	T	0.61	17.4162	16.6314	0.0704426	1
2	130289399	130289569	rs112482420	Alt	G	0.16	5.74805	5.37776	0.0329375	1.03	0.085776
2	130289399	130289569	rs112482420	Ref	T	0.11	1.9933	1.81615	0.0422473	1
X	80900477	80900647	rs112490959	Alt	G	-0.16	4.98047	4.64563	0.036036	1.02	0.465403
X	80900477	80900647	rs112490959	Ref	A	-0.19	5.89158	5.51537	0.038582	1
10	1580364	1580534	rs11250642	Alt	C	0.05	0.975888	0.871879	0.032885	0.99	0.616291
10	1580364	1580534	rs11250642	Ref	T	0.07	1.31352	1.18359	0.0332798	1
10	8556698	8556868	rs11255742	Alt	A	-0.1	2.45157	2.24677	0.0348473	1.14	0.0260875
10	8556698	8556868	rs11255742	Alt	C	0.16	4.25661	3.95661	0.0395778	1.36	0.0310376
10	8556698	8556868	rs11255742	Alt	G	-0.07	1.06724	0.955686	0.0378352	1.17	0.00979568
10	8556698	8556868	rs11255742	Ref	T	-0.29	13.1252	12.4741	0.0383	1
10	8557172	8557342	rs11255743	Alt	A	0	0.00837361	0.00681453	0.0539128	0.95	0.289532
10	8557172	8557342	rs11255743	Alt	T	-0.19	7.90668	7.44776	0.0330664	0.83	0.0436961
10	8557172	8557342	rs11255743	Ref	C	0.07	1.71678	1.55757	0.0315315	1
2	130264937	130265107	rs112562881	Alt	T	-0.12	1.625	1.47282	0.0510612	1.02	0.553965
2	130264937	130265107	rs112562881	Ref	C	-0.14	4.2132	3.91467	0.0355731	1
4	56944570	56944740	rs112564482	Alt	C	0.89	4.12085	3.8269	0.225094	1.4	0.0348903
4	56944570	56944740	rs112564482	Ref	G	0.41	1.89701	1.72578	0.16344	1
7	119950450	119950620	rs112565596	Alt	A	0.08	1.7588	1.5969	0.0336806	1.15	0.0188425
7	119950450	119950620	rs112565596	Ref	G	-0.12	3.27843	3.0282	0.0343655	1
18	2708400	2708570	rs112592594	Alt	T	0.25	9.47824	8.95662	0.0402631	1.12	0.0310618
18	2708400	2708570	rs112592594	Ref	C	0.09	1.12014	1.00442	0.0502991	1
2	29765516	29765686	rs112649057	Alt	G	0.75	87.8842	85.8137	0.0377849	1.86	0.000118444
2	29765516	29765686	rs112649057	Alt	T	0.1	1.34437	1.21217	0.0485449	1.18	0.0459732
2	29765516	29765686	rs112649057	Ref	C	-0.14	3.10879	2.86791	0.0418155	1
X	80362353	80362523	rs11266573	Alt	T	0	0.00310036	0.00255074	0.0387856	1.1	0.151559
X	80362353	80362523	rs11266573	Ref	C	-0.14	2.13282	1.94636	0.0519389	1
4	167924885	167925055	rs112683937	Alt	A	-0.13	1.6637	1.50839	0.0550799	0.72	0.101469
4	167924885	167925055	rs112683937	Alt	C	-0.01	0.0339798	0.0282974	0.0546571	0.78	0.0490971
4	167924885	167925055	rs112683937	Ref	G	0.35	12.4723	11.8434	0.0480873	1
2	130314427	130314597	rs112694127	Alt	C	0.09	1.253	1.12786	0.0459335	0.93	0.0866996
2	130314427	130314597	rs112694127	Alt	T	0.08	1.4789	1.33699	0.0380472	0.93	0.0526184
2	130314427	130314597	rs112694127	Ref	G	0.19	2.89002	2.66114	0.0579156	1
5	56758422	56758592	rs112776581	Alt	T	0.02	0.131728	0.112065	0.0577804	0.87	0.0251669
5	56758422	56758592	rs112776581	Alt	TAA	0.03	0.204203	0.175115	0.0558684	0.87	0.0295304
5	56758422	56758592	rs112776581	Ref	TA	0.22	6.71644	6.30464	0.0428453	1
12	121218157	121218327	rs112778059	Alt	T	0.89	7.73062	7.27944	0.158725	0.66	0.014505
12	121218157	121218327	rs112778059	Ref	C	1.49	12.0434	11.4296	0.208834	1
6	158319332	158319502	rs112784618	Alt	CTTTCTTAG	0.29	12.8921	12.2503	0.0397466	0.93	0.096546
6	158319332	158319502	rs112784618	Ref	C	0.4	16.9249	16.1502	0.0463972	1
X	81125076	81125246	rs112787998	Alt	A	0.44	18.5989	17.7817	0.0489796	1.34	0.0446501
X	81125076	81125246	rs112787998	Ref	G	0.01	0.0914613	0.0771924	0.0550878	1
X	80894571	80894741	rs112819962	Alt	T	0.25	10.7327	10.1665	0.0364922	1.55	0.00453918
X	80894571	80894741	rs112819962	Ref	C	-0.39	22.5148	21.5975	0.0388004	1
6	158314337	158314507	rs11282895	Alt	AAGATGC	-0.13	2.12174	1.93612	0.0471224	1.06	0.0571395
6	158314337	158314507	rs11282895	Ref	A	-0.2	9.15575	8.6483	0.032961	1
12	121231881	121232051	rs112856277	Alt	T	0.07	1.2388	1.11459	0.0359908	1.13	0.0333743
12	121231881	121232051	rs112856277	Ref	C	-0.1	1.58588	1.43603	0.0457267	1
3	114182673	114182843	rs112915369	Alt	C	0.24	6.73719	6.32452	0.0461006	1.08	0.187444
3	114182673	114182843	rs112915369	Ref	T	0.13	3.66962	3.39786	0.0350119	1
2	29762384	29762554	rs112950020	Alt	T	-0.05	0.775176	0.687228	0.0366018	0.92	0.0302925
2	29762384	29762554	rs112950020	Ref	C	0.07	1.30785	1.17829	0.0378718	1
5	42965737	42965907	rs11297665	Alt	C	0.35	26.7191	25.7022	0.0324562	1.02	0.57847
5	42965737	42965907	rs11297665	Alt	CTT	0.11	2.88422	2.6558	0.0340876	0.86	0.0126219
5	42965737	42965907	rs11297665	Ref	CT	0.33	13.0969	12.4465	0.0438683	1
7	31010578	31010748	rs11300414	Alt	A	-0.07	0.994624	0.888633	0.0412977	0.95	0.0708197
7	31010578	31010748	rs11300414	Alt	ATT	-0.07	1.37858	1.24364	0.036588	0.94	0.107551
7	31010578	31010748	rs11300414	Ref	AT	0.01	0.113925	0.0966186	0.0436746	1
2	4826290	4826460	rs11300780	Alt	C	0.15	3.30077	3.04913	0.0440123	1.13	0.15811
2	4826290	4826460	rs11300780	Alt	CT	-0.16	1.39599	1.26001	0.0781032	0.91	0.491989
2	4826290	4826460	rs11300780	Alt	CTTT	0.29	10.1853	9.63794	0.0448532	1.24	0.0412974
2	4826290	4826460	rs11300780	Ref	CTT	-0.02	0.192878	0.165354	0.0440427	1
3	114214151	114214321	rs113015898	Alt	A	0.71	63.678	61.9656	0.0418571	1.27	0.00455811
3	114214151	114214321	rs113015898	Alt	T	0.46	28.121	27.0766	0.0417128	1.07	0.00852787
3	114214151	114214321	rs113015898	Ref	C	0.37	19.78	18.93	0.0398275	1
5	51872098	51872268	rs113036388	Alt	C	0.42	18.5929	17.776	0.0468287	1.28	0.0403594
5	51872098	51872268	rs113036388	Ref	T	0.07	1.36101	1.22777	0.0337659	1
5	43000215	43000385	rs11308053	Alt	G	0.31	15.0982	14.3801	0.0383985	1.08	0.0431847
5	43000215	43000385	rs11308053	Ref	GA	0.2	9.59913	9.07312	0.0309708	1
6	11940681	11940851	rs113103441	Alt	T	-0.09	1.60242	1.45158	0.0390544	0.97	0.222587
6	11940681	11940851	rs113103441	Ref	C	-0.04	0.62904	0.553578	0.0320302	1
5	104575771	104575941	rs11312070	Alt	A	-0.3	9.67367	9.14531	0.0473537	0.97	0.534208
5	104575771	104575941	rs11312070	Ref	AC	-0.26	9.68158	9.15311	0.0408065	1
11	63108298	63108468	rs113132716	Alt	C	-0.01	0.133014	0.113255	0.0371296	0.83	0.0812722
11	63108298	63108468	rs113132716	Alt	T	-0.06	0.843175	0.749889	0.0399603	0.8	0.0928837
11	63108298	63108468	rs113132716	Ref	G	0.26	6.11156	5.72582	0.0534127	1
X	81337196	81337366	rs113148302	Alt	G	0.02	0.194479	0.166727	0.0453537	0.75	0.0192932
X	81337196	81337366	rs113148302	Alt	T	0.14	4.8088	4.48381	0.0333403	0.82	0.00964366
X	81337196	81337366	rs113148302	Ref	C	0.43	35.3893	34.2054	0.0344544	1
X	80387670	80387840	rs113198975	Alt	A	-0.28	9.62628	9.09956	0.0448049	0.92	0.375929
X	80387670	80387840	rs113198975	Ref	G	-0.17	4.63112	4.31463	0.0402489	1
4	167911066	167911236	rs11319898	Alt	A	-0.45	22.8893	21.9641	0.0453927	0.87	0.00973821
4	167911066	167911236	rs11319898	Ref	AG	-0.25	9.91897	9.38061	0.0384618	1
11	63132030	63132200	rs113251439	Alt	A	-0.34	10.9141	10.3409	0.05004	0.89	0.0615217
11	63132030	63132200	rs113251439	Ref	G	-0.16	3.92061	3.63511	0.0425643	1
15	68721360	68721530	rs113257011	Alt	T	1.95	22.116	21.205	0.197846	0.77	0.0221228
15	68721360	68721530	rs113257011	Ref	C	2.32	22.3705	21.4545	0.234078	1
10	53313145	53313315	rs113275896	Alt	C	-0.04	0.448793	0.39115	0.0395521	0.76	0.0132838
10	53313145	53313315	rs113275896	Ref	T	0.36	23.3944	22.4555	0.035869	1
6	158316178	158316348	rs113304054	Alt	GTC	0.44	30.7786	29.6819	0.037841	1.47	0.0035264
6	158316178	158316348	rs113304054	Alt	GTCTATGTA	0.16	5.18242	4.83837	0.0356173	1.21	0.00310946
6	158316178	158316348	rs113304054	Alt	GTCTGTGTA	0.07	1.42179	1.28422	0.0351984	1.14	0.0446921
6	158316178	158316348	rs113304054	Alt	GTCTTTATA	0.45	24.4833	23.5184	0.0429167	1.47	0.00103279
6	158316178	158316348	rs113304054	Alt	GTCTTTGTA	-0.23	6.53745	6.13354	0.0443257	0.92	0.170749
6	158316178	158316348	rs113304054	Ref	G	-0.11	2.42741	2.22363	0.0384932	1
17	47722970	47723140	rs113310655	Alt	C	0.1	1.97524	1.79933	0.0395588	1.26	0.00216555
17	47722970	47723140	rs113310655	Alt	CTT	-0.08	0.590669	0.518498	0.0727125	1.11	0.0962384
17	47722970	47723140	rs113310655	Alt	CTTT	-0.22	5.71561	5.34696	0.046345	1.01	0.911747
17	47722970	47723140	rs113310655	Ref	CT	-0.24	7.59395	7.14715	0.0426989	1
2	217722547	217722717	rs11331226	Alt	G	0.03	0.148962	0.126834	0.0795224	1.01	0.998504
2	217722547	217722717	rs11331226	Ref	GA	0.01	0.071691	0.0601256	0.0667406	1
14	88046054	88046224	rs11331723	Alt	C	-0.11	0.785616	0.696771	0.0793215	1.16	0.371737
14	88046054	88046224	rs11331723	Ref	CA	-0.33	2.64256	2.42736	0.108227	1
18	3572880	3573050	rs113334470	Alt	A	0.23	5.59079	5.22767	0.0479853	0.92	0.196016
18	3572880	3573050	rs113334470	Ref	G	0.35	24.4354	23.4713	0.033722	1
X	80768737	80768907	rs113372641	Alt	C	-0.21	7.44603	7.00516	0.038255	0.99	0.743757
X	80768737	80768907	rs113372641	Ref	T	-0.2	8.11303	7.64586	0.035182	1
8	57387531	57387701	rs11338488	Alt	G	0.49	39.9813	38.7014	0.0367549	1.31	0.0171232
8	57387531	57387701	rs11338488	Ref	GC	0.1	1.07607	0.963765	0.0573631	1
9	131059059	131059229	rs113409341	Alt	A	0.08	1.2448	1.12027	0.0398305	0.8	0.0177698
9	131059059	131059229	rs113409341	Alt	T	0.07	1.29766	1.16893	0.0348989	0.8	0.0103754
9	131059059	131059229	rs113409341	Ref	C	0.39	27.0346	26.0117	0.0356207	1
4	14114456	14114626	rs1134147	Alt	A	0.03	0.445412	0.388221	0.0309563	1.01	0.637665
4	14114456	14114626	rs1134147	Alt	C	-0.14	4.40764	4.10108	0.0331005	0.9	0.0274162
4	14114456	14114626	rs1134147	Ref	T	0.01	0.118084	0.100268	0.033407	1
5	56749884	56750054	rs113417697	Alt	G	0.23	8.03665	7.57189	0.0394206	0.94	0.186004
5	56749884	56750054	rs113417697	Alt	GAA	0.01	0.134807	0.11476	0.0388794	0.81	0.0237538
5	56749884	56750054	rs113417697	Alt	GAAA	0.36	20.5059	19.6386	0.0385478	1.04	0.41516
5	56749884	56750054	rs113417697	Ref	GA	0.31	12.3924	11.7667	0.0433357	1
4	77929193	77929363	rs11342578	Alt	T	-0.17	3.87573	3.59234	0.0436019	0.93	0.154862
4	77929193	77929363	rs11342578	Alt	TAA	-0.16	3.07189	2.83339	0.0474481	0.94	0.0439461
4	77929193	77929363	rs11342578	Ref	TA	-0.06	0.598509	0.525725	0.0561813	1
4	167922720	167922890	rs113450449	Alt	T	0.57	5.51779	5.15881	0.122553	1.7	0.0603491
4	167922720	167922890	rs113450449	Ref	TA	-0.2	0.907851	0.808815	0.12691	1
5	56708961	56709131	rs113465266	Alt	C	0.12	1.04897	0.939379	0.0721387	1.28	0.171973
5	56708961	56709131	rs113465266	Alt	CAA	-0.03	0.146348	0.124476	0.0768255	1.15	0.0430464
5	56708961	56709131	rs113465266	Ref	CA	-0.23	2.09321	1.90913	0.087403	1
1	42030496	42030666	rs11353606	Alt	T	-0.06	0.685046	0.604729	0.0455342	0.99	0.801084
1	42030496	42030666	rs11353606	Alt	TCC	0.17	4.29195	3.99067	0.0416775	1.16	0.0405202
1	42030496	42030666	rs11353606	Ref	TC	-0.04	0.561909	0.492575	0.0366795	1
15	68690973	68691143	rs113548876	Alt	A	2.51	59.7634	58.107	0.153095	0.88	0.071144
15	68690973	68691143	rs113548876	Ref	G	2.69	50.7585	49.2613	0.178384	1
9	131055956	131056126	rs11355239	Alt	T	0.29	5.82775	5.45401	0.0604362	1.06	0.140576
9	131055956	131056126	rs11355239	Alt	TAA	0.02	0.123146	0.104599	0.0694321	0.88	0.0439486
9	131055956	131056126	rs11355239	Ref	TA	0.2	3.1065	2.86572	0.060069	1
10	8528644	8528814	rs113573208	Alt	C	1	5.97601	5.59609	0.205299	0.67	0.0140872
10	8528644	8528814	rs113573208	Ref	A	1.58	19.4276	18.5869	0.17139	1
11	63115551	63115721	rs113633408	Alt	G	0.37	13.6383	12.9688	0.0478551	1.09	0.136849
11	63115551	63115721	rs113633408	Ref	A	0.24	12.37	11.7452	0.0326958	1
2	131085212	131085382	rs113700142	Alt	G	-0.01	0.0950695	0.0801992	0.0444227	0.59	0.00429283
2	131085212	131085382	rs113700142	Ref	A	0.75	111.511	109.114	0.0331945	1
5	51873922	51874092	rs113712987	Alt	A	0.16	3.9535	3.66676	0.0401395	1.06	0.138722
5	51873922	51874092	rs113712987	Ref	G	0.07	1.2998	1.17101	0.0356858	1
6	22687621	22687791	rs11371766	Alt	AG	0.03	0.331442	0.286775	0.0368192	0.76	0.0115779
6	22687621	22687791	rs11371766	Ref	A	0.42	19.1487	18.3169	0.0459748	1
17	7100583	7100753	rs113736768	Alt	A	-0.01	0.138677	0.117924	0.0337659	0.84	0.0104628
17	7100583	7100753	rs113736768	Alt	C	-0.17	4.6889	4.36923	0.039095	0.75	0.00559201
17	7100583	7100753	rs113736768	Ref	G	0.25	12.273	11.6517	0.034142	1
12	86184552	86184722	rs11374281	Alt	TC	0.27	15.5445	14.8125	0.0324378	0.82	0.013145
12	86184552	86184722	rs11374281	Ref	T	0.55	31.4576	30.3461	0.0462697	1
8	57411553	57411723	rs11377081	Alt	C	-0.07	0.900576	0.802344	0.045609	1.02	0.711608
8	57411553	57411723	rs11377081	Alt	CAA	0.03	0.404827	0.35262	0.035174	1.09	0.109786
8	57411553	57411723	rs11377081	Ref	CA	-0.1	1.47059	1.32936	0.0461287	1
3	159160385	159160555	rs113774983	Alt	A	0.1	0.9431	0.84145	0.0604051	0.98	0.688129
3	159160385	159160555	rs113774983	Ref	T	0.13	2.0784	1.89506	0.0495127	1
13	74638695	74638865	rs11377624	Alt	G	0.13	2.74121	2.52082	0.0411591	0.96	0.282223
13	74638695	74638865	rs11377624	Alt	GTT	0.01	0.0909538	0.0768971	0.0320352	0.89	0.0752447
13	74638695	74638865	rs11377624	Alt	GTTT	-0.13	2.91948	2.6894	0.0396219	0.81	0.00287245
13	74638695	74638865	rs11377624	Ref	GT	0.18	7.84461	7.38901	0.0322581	1
10	20980232	20980402	rs11377677	Alt	G	0.27	8.45774	7.97814	0.045524	1.2	0.0125751
10	20980232	20980402	rs11377677	Alt	GTT	-0.05	0.87118	0.775352	0.0361476	0.96	0.218416
10	20980232	20980402	rs11377677	Alt	GTTT	-0.11	2.16263	1.97451	0.0395482	0.92	0.131144
10	20980232	20980402	rs11377677	Ref	GT	0.01	0.0832591	0.070124	0.0385665	1
2	4852672	4852842	rs11379163	Alt	T	-0.56	0.638004	0.561634	0.46786	0.36	--
2	4852672	4852842	rs11379163	Alt	TCC	0.35	0.532322	0.465878	0.329184	0.68	--
2	4852672	4852842	rs11379163	Ref	TC	0.9	0.143878	0.122552	2.48762	1
5	56716371	56716541	rs113803454	Alt	T	-0.3	4.14778	3.85208	0.0765246	0.86	0.0943439
5	56716371	56716541	rs113803454	Ref	TC	-0.09	1.25479	1.12953	0.0451961	1
13	74651491	74651661	rs11383186	Alt	TA	0.18	4.41976	4.11246	0.0449102	1.11	0.0840535
13	74651491	74651661	rs11383186	Alt	TAA	0.08	1.46411	1.32331	0.0384722	1.03	0.194458
13	74651491	74651661	rs11383186	Ref	T	0.04	0.282472	0.243742	0.0608291	1
2	131093945	131094115	rs113867623	Alt	T	0.08	1.721	1.56122	0.0352944	0.85	0.000952203
2	131093945	131094115	rs113867623	Ref	C	0.31	21.9714	21.0627	0.0314957	1
5	115578692	115578862	rs11387457	Alt	CA	-0.08	1.10088	0.986628	0.0443939	0.92	0.188592
5	115578692	115578862	rs11387457	Alt	CAA	-0.3	11.1818	10.5987	0.0431761	0.79	0.0211783
5	115578692	115578862	rs11387457	Ref	C	0.04	0.38509	0.334841	0.0464287	1
5	104575944	104576114	rs113884316	Alt	AG	-0.21	6.54454	6.14032	0.0418661	0.68	0.0180747
5	104575944	104576114	rs113884316	Alt	AT	-0.02	0.220848	0.189503	0.0477714	0.78	0.0199347
5	104575944	104576114	rs113884316	Ref	A	0.34	22.5672	21.649	0.034147	1
10	52539768	52539938	rs113920486	Alt	G	0.1	1.7203	1.56067	0.0406919	1.15	0.0566298
10	52539768	52539938	rs113920486	Ref	C	-0.11	2.40237	2.20049	0.0379402	1
4	4616239	4616409	rs113928962	Alt	A	0.52	41.0374	39.7385	0.0386427	0.95	0.151282
4	4616239	4616409	rs113928962	Alt	G	0.62	39.6333	38.3615	0.046844	1.02	0.47131
4	4616239	4616409	rs113928962	Alt	T	0.72	67.5871	65.8012	0.0409847	1.09	0.136179
4	4616239	4616409	rs113928962	Ref	C	0.59	33.4497	32.3003	0.0483965	1
5	43064366	43064536	rs113948160	Alt	A	1.53	15.7226	14.9835	0.18598	0.98	0.707556
5	43064366	43064536	rs113948160	Alt	C	1.54	28.6937	27.6398	0.137184	0.99	0.721569
5	43064366	43064536	rs113948160	Alt	T	1.52	30.9091	29.8085	0.130264	0.98	0.231133
5	43064366	43064536	rs113948160	Ref	G	1.56	32.6129	31.4821	0.12964	1
4	167924797	167924967	rs113955246	Alt	G	0.29	14.2413	13.5508	0.0374195	1.26	0.00198422
4	167924797	167924967	rs113955246	Alt	T	0.27	8.12059	7.65307	0.0474685	1.24	0.0281114
4	167924797	167924967	rs113955246	Ref	C	-0.04	0.435567	0.37994	0.0418806	1
5	42865112	42865282	rs113978639	Alt	A	-0.31	2.97296	2.73971	0.0932641	1.03	0.912106
5	42865112	42865282	rs113978639	Ref	G	-0.35	5.71581	5.34701	0.0739752	1
6	85587020	85587190	rs113987455	Alt	T	0.34	26.6628	25.6472	0.0317936	1.39	0.00136814
6	85587020	85587190	rs113987455	Ref	C	-0.13	3.55301	3.28748	0.0359859	1
4	77917758	77917928	rs113991468	Alt	A	0.51	37.9003	36.663	0.0392859	0.93	0.410258
4	77917758	77917928	rs113991468	Ref	G	0.61	7.76835	7.31544	0.108882	1
14	40887569	40887739	rs11402564	Alt	T	-0.12	2.90981	2.6801	0.0362826	0.57	0.0182242
14	40887569	40887739	rs11402564	Alt	TAA	-0.03	0.305855	0.263968	0.0402801	0.61	0.0268405
14	40887569	40887739	rs11402564	Ref	TA	0.7	50.7827	49.2846	0.0461674	1
4	118357121	118357291	rs11403103	Alt	CT	-0.01	0.120936	0.102739	0.0395663	0.68	0.00578676
4	118357121	118357291	rs11403103	Ref	C	0.54	45.3049	43.9136	0.0378326	1
1	42020409	42020579	rs11403967	Alt	AC	0.11	2.244	2.05082	0.0393917	1.06	0.333722
1	42020409	42020579	rs11403967	Alt	AT	0.21	4.31834	4.01584	0.0521273	1.14	0.043693
1	42020409	42020579	rs11403967	Ref	A	0.02	0.188049	0.160882	0.0413549	1
2	4850228	4850398	rs11408788	Alt	GC	-0.13	3.73551	3.46042	0.0354182	1.18	0.0516373
2	4850228	4850398	rs11408788	Ref	G	-0.38	12.5584	11.9268	0.0513373	1
3	159065529	159065699	rs11411129	Alt	GCTT	0.3	11.3313	10.7425	0.0440046	1.14	0.00150891
3	159065529	159065699	rs11411129	Alt	GGT	-0.04	0.402185	0.350254	0.0443	0.9	0.106176
3	159065529	159065699	rs11411129	Ref	G	0.11	1.64472	1.49106	0.0483674	1
6	158328688	158328858	rs11412128	Alt	TG	-0.1	2.47961	2.27274	0.0331896	1.02	0.570761
6	158328688	158328858	rs11412128	Ref	T	-0.12	3.01987	2.78426	0.0364183	1
6	158317102	158317272	rs11416618	Alt	GT	0.25	10.9461	10.3715	0.0371488	1.13	0.0884527
6	158317102	158317272	rs11416618	Alt	GTT	-0.32	9.25919	8.7472	0.051895	0.76	0.00318174
6	158317102	158317272	rs11416618	Ref	G	0.08	1.53002	1.3848	0.0356001	1
4	77984880	77985050	rs11424253	Alt	AT	0.37	24.7007	23.7305	0.0357114	0.82	0.011782
4	77984880	77985050	rs11424253	Ref	A	0.66	77.5415	75.6004	0.0352064	1
11	63121442	63121612	rs11430358	Alt	CA	-0.08	1.56212	1.41412	0.0346697	0.84	0.0313757
11	63121442	63121612	rs11430358	Ref	C	0.17	6.97096	6.54985	0.0318249	1
5	42904126	42904296	rs114317986	Alt	A	0.51	1.58104	1.43149	0.231682	0.9	0.181851
5	42904126	42904296	rs114317986	Alt	T	0.86	7.12308	6.69507	0.160157	1.14	0.0399409
5	42904126	42904296	rs114317986	Ref	C	0.67	7.85306	7.39694	0.118848	1
6	158232698	158232868	rs114359618	Alt	T	-0.11	2.31446	2.1178	0.0375378	0.84	0.0263966
6	158232698	158232868	rs114359618	Ref	C	0.15	2.05841	1.8767	0.0581925	1
3	142116042	142116212	rs114503684	Alt	G	-0.07	1.10338	0.988931	0.0387619	0.99	0.528995
3	142116042	142116212	rs114503684	Alt	T	0.12	3.30892	3.05695	0.0349456	1.12	0.00556826
3	142116042	142116212	rs114503684	Ref	C	-0.05	0.740064	0.65491	0.0358006	1
4	56992207	56992377	rs114513553	Alt	A	0.27	14.1277	13.4422	0.0350286	0.94	0.0484903
4	56992207	56992377	rs114513553	Alt	T	-0.02	0.259663	0.223801	0.0408946	0.77	0.00297852
4	56992207	56992377	rs114513553	Ref	G	0.36	28.4228	27.374	0.0320053	1
5	42870616	42870786	rs114598563	Alt	G	0.34	20.0848	19.2269	0.0362857	0.97	0.219263
5	42870616	42870786	rs114598563	Ref	A	0.38	23.0232	22.0934	0.037947	1
15	68709803	68709973	rs11462221	Alt	AC	-0.23	4.40132	4.09544	0.055879	0.76	0.00909143
15	68709803	68709973	rs11462221	Ref	A	0.16	3.47902	3.21762	0.0443896	1
5	42986496	42986666	rs114742786	Alt	A	-0.25	4.32267	4.01993	0.0617158	1.25	0.171921
5	42986496	42986666	rs114742786	Alt	T	0.15	2.86589	2.63804	0.0483427	1.65	0.0112154
5	42986496	42986666	rs114742786	Ref	G	-0.57	18.1441	17.3409	0.0642257	1
10	104181324	104181494	rs1147610	Alt	T	-0.17	3.11957	2.87789	0.051682	0.98	0.831068
10	104181324	104181494	rs1147610	Ref	G	-0.14	1.46138	1.32095	0.066603	1
20	34976965	34977135	rs11478629	Alt	C	-0.01	0.0276092	0.0231001	0.135246	1.07	0.718919
20	34976965	34977135	rs11478629	Ref	CT	-0.11	0.488849	0.426889	0.109592	1
11	63112084	63112254	rs11494052	Alt	T	0.2	8.55396	8.07066	0.0337376	0.98	0.0510992
11	63112084	63112254	rs11494052	Ref	A	0.24	11.6284	11.0312	0.033706	1
11	63127391	63127561	rs11494054	Alt	A	-0.04	0.560198	0.491008	0.0333083	1.07	0.212878
11	63127391	63127561	rs11494054	Ref	T	-0.14	4.62513	4.30895	0.0328268	1
11	63110798	63110968	rs11494202	Alt	G	-0.33	11.6936	11.0934	0.0469393	0.64	0.021842
11	63110798	63110968	rs11494202	Ref	A	0.32	12.1513	11.5331	0.0452202	1
5	42908559	42908729	rs114998182	Alt	C	0.02	0.18523	0.158355	0.0357618	0.97	0.442068
5	42908559	42908729	rs114998182	Ref	G	0.05	0.937629	0.836403	0.0342699	1
11	63109640	63109810	rs11501478	Alt	A	-0.08	1.36205	1.22864	0.0379129	1.04	0.502727
11	63109640	63109810	rs11501478	Alt	C	-0.23	10.3374	9.78474	0.0347589	0.93	0.26121
11	63109640	63109810	rs11501478	Alt	G	0.1	2.68687	2.46896	0.0309676	1.17	0.0126312
11	63109640	63109810	rs11501478	Ref	T	-0.13	2.04542	1.86445	0.0484477	1
11	63109766	63109936	rs11501479	Alt	C	-0.25	11.6476	11.0493	0.0361439	0.95	0.165478
11	63109766	63109936	rs11501479	Alt	G	0.08	1.68132	1.52487	0.0358817	1.19	0.0099973
11	63109766	63109936	rs11501479	Alt	T	-0.39	26.3281	25.3194	0.0358861	0.86	0.0508073
11	63109766	63109936	rs11501479	Ref	A	-0.17	6.9106	6.4915	0.0325662	1
11	63109875	63110045	rs11501480	Alt	G	0.22	8.98502	8.48303	0.0361382	1.59	0.000888228
11	63109875	63110045	rs11501480	Alt	T	0.3	19.3922	18.5533	0.0324986	1.68	0.000995831
11	63109875	63110045	rs11501480	Ref	C	-0.45	31.0056	29.9035	0.0382489	1
11	63110525	63110695	rs11501660	Alt	A	0.18	6.42365	6.02442	0.0350556	1	0.570324
11	63110525	63110695	rs11501660	Alt	C	0.23	12.7829	12.1456	0.0317306	1.04	0.162365
11	63110525	63110695	rs11501660	Alt	T	0.03	0.447057	0.389553	0.0350395	0.91	0.0880816
11	63110525	63110695	rs11501660	Ref	G	0.17	5.52773	5.16805	0.0370094	1
2	29743861	29744031	rs115079949	Alt	T	-0.12	2.4594	2.25396	0.0396698	0.93	0.166021
2	29743861	29744031	rs115079949	Ref	A	-0.01	0.0929285	0.0784388	0.0378674	1
5	42908992	42909162	rs115122924	Alt	A	0.91	53.9145	52.3556	0.0583413	0.85	0.0857711
5	42908992	42909162	rs115122924	Ref	G	1.14	50.7976	49.2985	0.0756539	1
11	63054364	63054534	rs11512861	Alt	C	-0.01	0.0388722	0.0323852	0.0501296	1.05	0.555358
11	63054364	63054534	rs11512861	Ref	G	-0.08	0.881817	0.785151	0.0535077	1
6	76809562	76809732	rs115139547	Alt	G	-0.02	0.128358	0.109174	0.0681681	0.75	0.00103994
6	76809562	76809732	rs115139547	Ref	T	0.4	20.792	19.9172	0.0414734	1
12	69984388	69984558	rs11514295	Alt	C	0.26	14.7286	14.0234	0.0325676	1.04	0.383158
12	69984388	69984558	rs11514295	Alt	G	-0.03	0.331782	0.287081	0.0353907	0.85	0.0402631
12	69984388	69984558	rs11514295	Ref	T	0.2	8.62739	8.14026	0.0337388	1
11	63130726	63130896	rs11518687	Alt	G	0.52	49.6293	48.1591	0.0346594	1.23	0.00965236
11	63130726	63130896	rs11518687	Alt	T	0.61	41.933	40.616	0.0447282	1.31	0.013081
11	63130726	63130896	rs11518687	Ref	A	0.22	6.56772	6.16257	0.0425247	1
4	56900672	56900842	rs115267736	Alt	G	3.84	39.6458	38.3734	0.289038	0.86	0.0608995
4	56900672	56900842	rs115267736	Ref	A	4.06	37.1886	35.9654	0.315481	1
1	150613755	150613925	rs115282751	Alt	G	0.15	3.97233	3.68476	0.0387488	1.13	0.15294
1	150613755	150613925	rs115282751	Ref	A	-0.02	0.222209	0.190733	0.0398337	1
5	42960763	42960933	rs115300972	Alt	A	0.42	27.48	26.4493	0.0385105	1.23	0.0443143
5	42960763	42960933	rs115300972	Alt	C	0.23	8.49232	8.01133	0.0387446	1.08	0.0666114
5	42960763	42960933	rs115300972	Alt	T	0.42	25.0599	24.0796	0.0398879	1.23	0.0493241
5	42960763	42960933	rs115300972	Ref	G	0.12	2.48676	2.27941	0.0422225	1
5	128397885	128398055	rs115332630	Alt	T	0.08	1.76795	1.60546	0.0318532	1.31	0.000359937
5	128397885	128398055	rs115332630	Ref	C	-0.32	8.7192	8.22717	0.0528887	1
14	40824900	40825070	rs1154135	Alt	A	-0.41	11.4206	10.829	0.0584393	1.03	0.372403
14	40824900	40825070	rs1154135	Alt	C	-0.28	7.01538	6.59233	0.0516435	1.13	0.125244
14	40824900	40825070	rs1154135	Alt	T	-0.25	10.5664	10.0054	0.0382245	1.14	0.0374884
14	40824900	40825070	rs1154135	Ref	G	-0.45	21.5031	20.6056	0.0461977	1
14	40825529	40825699	rs1154136	Alt	A	-0.17	3.45093	3.19132	0.0478231	1.09	0.126446
14	40825529	40825699	rs1154136	Alt	G	-0.02	0.184388	0.157643	0.0384056	1.22	0.052958
14	40825529	40825699	rs1154136	Ref	C	-0.3	10.4541	9.89723	0.0453299	1
14	40917716	40917886	rs1154140	Alt	A	0.01	0.172878	0.147688	0.0332856	1	0.970423
14	40917716	40917886	rs1154140	Ref	G	0.02	0.201051	0.17242	0.036906	1
6	11933012	11933182	rs115416278	Alt	A	1.41	121.712	119.222	0.0597554	0.92	0.0339426
6	11933012	11933182	rs115416278	Ref	G	1.53	175.728	172.689	0.0539748	1
9	8006462	8006632	rs11543913	Alt	A	0.09	1.41624	1.27888	0.0416406	0.91	0.115993
9	8006462	8006632	rs11543913	Alt	C	0.04	0.574617	0.504065	0.03629	0.88	0.0677311
9	8006462	8006632	rs11543913	Ref	G	0.22	7.46131	7.0196	0.040387	1
12	86207028	86207198	rs115655966	Alt	A	0.06	0.865009	0.769752	0.041282	0.97	0.37806
12	86207028	86207198	rs115655966	Alt	C	0.36	20.9211	20.0432	0.0375208	1.19	0.00433451
12	86207028	86207198	rs115655966	Ref	T	0.11	1.48642	1.34396	0.0526136	1
8	105518997	105519167	rs1157141	Alt	C	0.19	5.2045	4.85971	0.0418333	1.23	0.0578307
8	105518997	105519167	rs1157141	Alt	G	-0.14	2.97962	2.74606	0.0436898	0.97	0.536205
8	105518997	105519167	rs1157141	Ref	A	-0.1	2.07049	1.88767	0.0398197	1
8	105519361	105519531	rs1157142	Alt	A	0.35	10.1544	9.6085	0.0540152	1.28	0.0253389
8	105519361	105519531	rs1157142	Alt	T	0.49	8.43311	7.95471	0.0824536	1.4	0.0867185
8	105519361	105519531	rs1157142	Ref	G	0	0.00644843	0.00528729	0.0733833	1
4	57040143	57040313	rs11573113	Alt	A	-0.2	5.94399	5.56553	0.0402917	1.07	6.29248e-05
4	57040143	57040313	rs11573113	Ref	G	-0.29	12.3618	11.7375	0.0402075	1
6	76809558	76809728	rs115739474	Alt	A	0.18	5.10438	4.76469	0.0407489	0.78	0.0578919
6	76809558	76809728	rs115739474	Alt	G	0.04	0.528111	0.462058	0.0417063	0.71	0.0124994
6	76809558	76809728	rs115739474	Ref	T	0.54	44.3771	43.0119	0.0381166	1
20	7541311	7541481	rs115761617	Alt	G	-0.15	4.17246	3.87568	0.0386147	1.14	0.0450123
20	7541311	7541481	rs115761617	Ref	A	-0.35	15.9311	15.1845	0.041832	1
1	150754833	150755003	rs11576175	Alt	A	0.11	1.58454	1.43474	0.0510401	1.03	0.613409
1	150754833	150755003	rs11576175	Ref	G	0.07	1.13173	1.01521	0.0403084	1
3	49772234	49772404	rs115770773	Alt	C	0.11	0.38091	0.331209	0.140665	1	0.990157
3	49772234	49772404	rs115770773	Ref	T	0.11	0.312715	0.270042	0.15599	1
12	94144518	94144688	rs115789286	Alt	G	-0.11	2.36357	2.16392	0.0383817	0.78	0.00335285
12	94144518	94144688	rs115789286	Alt	T	0.18	7.80407	7.34985	0.032267	0.95	0.00700179
12	94144518	94144688	rs115789286	Ref	C	0.26	12.9798	12.3344	0.0345419	1
1	150971608	150971778	rs11579289	Alt	A	-0.07	1.05695	0.946457	0.0391038	0.94	0.209591
1	150971608	150971778	rs11579289	Alt	C	0.36	9.71273	9.1824	0.0560026	1.26	0.00458021
1	150971608	150971778	rs11579289	Ref	G	0.02	0.23514	0.20225	0.0414003	1
1	118394794	118394964	rs11581563	Alt	C	-0.13	3.55365	3.28789	0.035315	1.09	0.0686658
1	118394794	118394964	rs11581563	Ref	T	-0.25	6.84411	6.42772	0.0481172	1
1	118394692	118394862	rs11582487	Alt	A	0.02	0.145789	0.124013	0.0425093	0.97	0.0723874
1	118394692	118394862	rs11582487	Ref	G	0.05	0.957047	0.854509	0.0337402	1
1	150597677	150597847	rs11585460	Alt	A	5.07	63.9645	62.2426	0.298746	0.84	0.0056359
1	150597677	150597847	rs11585460	Alt	C	3.07	60.5679	58.8975	0.185992	0.21	0.014634
1	150597677	150597847	rs11585460	Ref	G	5.32	66.9702	65.1953	0.306003	1
10	44515582	44515752	rs11591669	Alt	C	0.17	3.95456	3.66769	0.0429011	0.83	0.0500156
10	44515582	44515752	rs11591669	Ref	A	0.43	17.7991	17.0059	0.0488739	1
10	8533535	8533705	rs11592436	Alt	G	0.23	7.04826	6.62335	0.0432605	0.93	0.0895606
10	8533535	8533705	rs11592436	Ref	C	0.34	20.0537	19.1969	0.0362601	1
10	44601932	44602102	rs11592569	Alt	A	-0.16	5.62832	5.26386	0.0333697	0.93	0.178048
10	44601932	44602102	rs11592569	Alt	T	0.05	0.700811	0.618838	0.037686	1.08	0.0189571
10	44601932	44602102	rs11592569	Ref	C	-0.06	0.94103	0.839534	0.0361839	1
10	44632619	44632789	rs11593138	Alt	G	0.77	81.0013	79.0183	0.0402065	1.1	0.018106
10	44632619	44632789	rs11593138	Alt	T	0.17	5.73055	5.36097	0.0351923	0.73	0.00292014
10	44632619	44632789	rs11593138	Ref	C	0.63	82.5989	80.5948	0.0324982	1
10	44533021	44533191	rs11593423	Alt	T	0.2	3.81679	3.53708	0.0524106	0.95	0.127346
10	44533021	44533191	rs11593423	Ref	C	0.27	13.1411	12.4891	0.0355949	1
10	44518361	44518531	rs11593437	Alt	T	0.02	0.200267	0.171766	0.0364429	1.33	0.00888098
10	44518361	44518531	rs11593437	Ref	A	-0.39	14.2157	13.5269	0.0504035	1
10	44518383	44518553	rs11593439	Alt	G	0.08	1.4344	1.29578	0.0369126	0.91	0.0189532
10	44518383	44518553	rs11593439	Alt	T	0.7	60.7773	59.1041	0.0425274	1.41	0.00550623
10	44518383	44518553	rs11593439	Ref	A	0.21	9.3342	8.81802	0.0330285	1
10	44575660	44575830	rs11593585	Alt	T	-0.18	7.71157	7.26116	0.0329185	1.09	0.0672228
10	44575660	44575830	rs11593585	Ref	G	-0.31	11.5069	10.9134	0.0449001	1
10	44515553	44515723	rs11593591	Alt	A	-0.27	10.2915	9.73998	0.0411187	0.99	0.135646
10	44515553	44515723	rs11593591	Alt	C	-0.26	13.4071	12.7446	0.0349094	0.99	0.923801
10	44515553	44515723	rs11593591	Ref	G	-0.25	11.6887	11.0888	0.0355825	1
10	44528270	44528440	rs11594054	Alt	A	0.1	1.82218	1.65649	0.0404263	0.94	0.164948
10	44528270	44528440	rs11594054	Alt	G	0.21	7.11289	6.68545	0.0389388	1.02	0.355637
10	44528270	44528440	rs11594054	Alt	T	0.45	35.5386	34.3505	0.0357606	1.2	0.0248622
10	44528270	44528440	rs11594054	Ref	C	0.18	3.94051	3.65447	0.0469998	1
10	8533075	8533245	rs11595047	Alt	C	-0.37	10.0042	9.46376	0.057791	0.95	0.519468
10	8533075	8533245	rs11595047	Ref	T	-0.29	6.44828	6.04814	0.057667	1
10	44591555	44591725	rs11595335	Alt	G	-0.14	4.63738	4.32063	0.034036	0.87	0.0287704
10	44591555	44591725	rs11595335	Ref	T	0.06	0.884324	0.787314	0.039861	1
10	44519008	44519178	rs11595472	Alt	A	-0.1	2.50848	2.29994	0.0353519	1.02	0.0552187
10	44519008	44519178	rs11595472	Alt	C	-0.24	12.1179	11.5011	0.0336382	0.93	0.237339
10	44519008	44519178	rs11595472	Ref	G	-0.14	4.72804	4.40684	0.0325823	1
10	44632779	44632949	rs11595799	Alt	C	0.99	45.1731	43.7869	0.0699605	1.22	0.00169984
10	44632779	44632949	rs11595799	Ref	T	0.7	4.5052	4.19435	0.168811	1
10	44520197	44520367	rs11596551	Alt	A	-0.02	0.15754	0.134254	0.0576291	1.02	0.503209
10	44520197	44520367	rs11596551	Alt	C	0.08	1.05684	0.946387	0.0497048	1.09	0.222265
10	44520197	44520367	rs11596551	Ref	G	-0.05	0.539393	0.472345	0.0430855	1
10	8517208	8517378	rs11596712	Alt	C	0.08	0.905706	0.806938	0.0518477	0.73	0.0339015
10	8517208	8517378	rs11596712	Ref	A	0.52	20.8158	19.9406	0.055037	1
10	8539061	8539231	rs11596994	Alt	A	-0.35	13.2404	12.5854	0.0468865	0.67	0.00426373
10	8539061	8539231	rs11596994	Ref	G	0.23	8.43396	7.95547	0.0390265	1
10	44557989	44558159	rs11597734	Alt	A	-0.08	1.67884	1.52257	0.0359201	0.85	0.00709644
10	44557989	44558159	rs11597734	Ref	G	0.16	4.24049	3.94098	0.0397556	1
10	44530196	44530366	rs11597961	Alt	A	-0.25	5.03995	4.70233	0.05611	0.95	0.465442
10	44530196	44530366	rs11597961	Ref	T	-0.17	4.79861	4.47413	0.0403897	1
10	44577008	44577178	rs11598774	Alt	A	0.73	41.5885	40.2828	0.0535772	1.26	0.025115
10	44577008	44577178	rs11598774	Alt	T	0.07	1.30619	1.1768	0.0333544	0.79	0.00781561
10	44577008	44577178	rs11598774	Ref	C	0.4	31.9455	30.8272	0.0334914	1
10	44559229	44559399	rs11598916	Alt	A	0.13	4.11829	3.82458	0.031791	1.22	0.0187056
10	44559229	44559399	rs11598916	Ref	G	-0.16	5.5259	5.16635	0.0349282	1
5	42917056	42917226	rs116072255	Alt	A	0.26	7.46593	7.02397	0.0476111	1.27	0.0722518
5	42917056	42917226	rs116072255	Alt	T	0	0.0204967	0.0174036	0.0410077	1.06	0.046992
5	42917056	42917226	rs116072255	Ref	C	-0.08	2.01147	1.83322	0.0310069	1
6	76809560	76809730	rs116190561	Alt	G	0.02	0.112566	0.0954172	0.0577118	0.73	0.0141485
6	76809560	76809730	rs116190561	Ref	T	0.46	34.9669	33.7918	0.0369824	1
5	128666970	128667140	rs116215337	Alt	A	-0.11	1.74649	1.58542	0.0474369	1.19	0.00919716
5	128666970	128667140	rs116215337	Ref	G	-0.37	12.4515	11.8233	0.0506621	1
14	24586061	24586231	rs11621703	Alt	A	-0.14	3.5117	3.24846	0.0385943	0.98	0.457866
14	24586061	24586231	rs11621703	Ref	G	-0.11	2.00921	1.83107	0.0425985	1
14	24583213	24583383	rs11622908	Alt	C	0.14	3.4937	3.23158	0.0388242	0.87	0.0674849
14	24583213	24583383	rs11622908	Ref	A	0.34	14.7925	14.085	0.0424078	1
14	24574921	24575091	rs11623400	Alt	A	-0.06	0.963332	0.860253	0.0386022	1.01	0.67365
14	24574921	24575091	rs11623400	Alt	C	-0.12	3.06412	2.82583	0.0361785	0.97	0.284011
14	24574921	24575091	rs11623400	Alt	T	-0.16	5.71879	5.34978	0.0329007	0.94	0.0779266
14	24574921	24575091	rs11623400	Ref	G	-0.07	1.50353	1.36005	0.0346235	1
14	24581101	24581271	rs11624387	Alt	A	-0.32	14.5363	13.838	0.0406018	0.87	0.0977979
14	24581101	24581271	rs11624387	Alt	C	-0.28	9.83535	9.30055	0.0433815	0.89	0.0339288
14	24581101	24581271	rs11624387	Alt	T	-0.46	17.6048	16.8153	0.0525971	0.79	0.0226683
14	24581101	24581271	rs11624387	Ref	G	-0.11	2.93746	2.70619	0.0347795	1
14	96346751	96346921	rs11624919	Alt	C	-0.01	0.102962	0.0871451	0.0360051	1.07	0.234125
14	96346751	96346921	rs11624919	Ref	T	-0.1	1.46127	1.32088	0.0482434	1
14	40893774	40893944	rs11625930	Alt	A	-0.09	0.642529	0.56583	0.0762282	1.02	0.766532
14	40893774	40893944	rs11625930	Ref	T	-0.12	0.924588	0.824285	0.075341	1
14	40916996	40917166	rs11626502	Alt	C	-0.01	0.0586521	0.049119	0.0349514	0.95	0.090096
14	40916996	40917166	rs11626502	Ref	T	0.07	1.2173	1.09492	0.0348848	1
14	96274802	96274972	rs11626903	Alt	A	0.11	2.11828	1.93289	0.0415344	1.08	0.0172611
14	96274802	96274972	rs11626903	Alt	T	-0.14	3.19523	2.94959	0.0411663	0.9	0.0104828
14	96274802	96274972	rs11626903	Ref	C	0.01	0.062017	0.0519846	0.036922	1
14	96370502	96370672	rs11627143	Alt	G	0.21	6.22148	5.83044	0.0418961	1.18	0.0540713
14	96370502	96370672	rs11627143	Ref	C	-0.03	0.433419	0.378173	0.0387318	1
14	24577680	24577850	rs11627296	Alt	G	0.32	11.9328	11.3237	0.0443101	1.1	0.020789
14	24577680	24577850	rs11627296	Alt	T	-0.02	0.190128	0.162734	0.0533998	0.87	0.0548029
14	24577680	24577850	rs11627296	Ref	C	0.18	5.53152	5.17141	0.0379415	1
14	40869688	40869858	rs11628690	Alt	A	0.15	3.04609	2.8088	0.0448565	1.03	0.481946
14	40869688	40869858	rs11628690	Alt	G	0.29	11.8533	11.2467	0.0407913	1.13	0.0597875
14	40869688	40869858	rs11628690	Alt	T	-0.05	0.611574	0.537526	0.0429088	0.9	0.0537824
14	40869688	40869858	rs11628690	Ref	C	0.11	2.32808	2.13041	0.0377122	1
14	40892896	40893066	rs11628872	Alt	C	0.35	21.7346	20.8318	0.0360713	1.01	0.807598
14	40892896	40893066	rs11628872	Ref	G	0.34	16.957	16.1814	0.0391842	1
5	42917057	42917227	rs116394289	Alt	A	-0.09	1.60695	1.4558	0.0405209	0.9	0.0372387
5	42917057	42917227	rs116394289	Alt	G	-0.21	5.37661	5.02393	0.0457304	0.83	0.0392834
5	42917057	42917227	rs116394289	Alt	T	0.15	5.11976	4.779	0.0335095	1.06	0.059653
5	42917057	42917227	rs116394289	Ref	C	0.06	1.21996	1.09738	0.0342623	1
16	87170920	87171090	rs11640818	Alt	A	0.13	3.59479	3.32695	0.0364373	1.04	0.164855
16	87170920	87171090	rs11640818	Ref	C	0.08	1.37662	1.24198	0.0398593	1
16	87170896	87171066	rs11647130	Alt	C	-0.25	10.1552	9.60919	0.0379738	0.87	0.0284536
16	87170896	87171066	rs11647130	Alt	G	-0.04	0.5805	0.509229	0.0386732	1.01	0.590411
16	87170896	87171066	rs11647130	Ref	T	-0.05	0.807669	0.71691	0.0364317	1
6	9322975	9323145	rs116488128	Alt	C	0.01	0.0573241	0.0480716	0.0682428	1.06	0.331864
6	9322975	9323145	rs116488128	Alt	G	-0.18	2.30156	2.10556	0.064456	0.93	0.507987
6	9322975	9323145	rs116488128	Ref	A	-0.08	0.473286	0.412986	0.0828536	1
5	129839370	129839540	rs116488178	Alt	G	0.06	1.1045	0.989937	0.0351787	1.19	0.00444722
5	129839370	129839540	rs116488178	Ref	A	-0.19	5.35631	5.00472	0.0418244	1
16	81151636	81151806	rs11649028	Alt	A	0.02	0.250411	0.215838	0.036003	1.06	0.0509569
16	81151636	81151806	rs11649028	Alt	T	-0.29	18.7504	17.93	0.0323199	0.85	0.00357148
16	81151636	81151806	rs11649028	Ref	G	-0.06	1.00269	0.896033	0.0377713	1
5	42873414	42873584	rs116502036	Alt	T	-0.18	4.66508	4.34687	0.0426783	0.94	0.0521007
5	42873414	42873584	rs116502036	Ref	C	-0.08	1.7461	1.58508	0.0358755	1
5	42931988	42932158	rs116504242	Alt	A	-0.42	12.4275	11.8	0.0579753	0.77	0.0713427
5	42931988	42932158	rs116504242	Alt	T	-0.33	13.45	12.7863	0.0437062	0.82	0.0269855
5	42931988	42932158	rs116504242	Ref	C	-0.04	0.762356	0.675574	0.0323409	1
17	14212602	14212772	rs11650428	Alt	G	-0.03	0.352377	0.30571	0.0356692	0.9	0.163849
17	14212602	14212772	rs11650428	Ref	C	0.13	3.75633	3.48007	0.0334087	1
2	239520423	239520593	rs116566032	Alt	A	-0.15	6.00402	5.62307	0.0314498	0.95	0.365342
2	239520423	239520593	rs116566032	Alt	T	-0.41	15.2327	14.5105	0.050575	0.8	0.082119
2	239520423	239520593	rs116566032	Ref	G	-0.09	1.58591	1.43603	0.0388871	1
19	14334450	14334620	rs11665908	Alt	G	0.4	35.8058	34.6101	0.0316545	1.1	0.0757063
19	14334450	14334620	rs11665908	Alt	T	0.22	10.9389	10.3649	0.0325726	0.97	0.385005
19	14334450	14334620	rs11665908	Ref	C	0.26	15.7434	15.0036	0.0316563	1
19	14340681	14340851	rs11666789	Alt	A	0.11	3.00467	2.76986	0.0320498	0.95	0.153145
19	14340681	14340851	rs11666789	Alt	T	0.05	0.788993	0.699847	0.0356121	0.91	0.100244
19	14340681	14340851	rs11666789	Ref	C	0.19	6.24044	5.8488	0.0371414	1
19	14334022	14334192	rs11669111	Alt	C	0.28	9.68556	9.15678	0.0447446	1.17	0.0810787
19	14334022	14334192	rs11669111	Alt	G	0.46	33.9609	32.8024	0.0376376	1.32	0.0313779
19	14334022	14334192	rs11669111	Alt	T	0.61	49.343	47.8791	0.0409453	1.46	0.0130724
19	14334022	14334192	rs11669111	Ref	A	0.06	0.150718	0.128236	0.155004	1
19	14334241	14334411	rs11669181	Alt	C	1.39	34.8106	33.6391	0.112096	1.15	0.0256957
19	14334241	14334411	rs11669181	Alt	G	1.52	127.88	125.329	0.0631686	1.26	0.0103965
19	14334241	14334411	rs11669181	Alt	T	1.42	111.817	109.405	0.0627783	1.17	0.0118913
19	14334241	14334411	rs11669181	Ref	A	1.19	82.9312	80.9241	0.0614038	1
19	14336703	14336873	rs11670064	Alt	A	-0.16	3.66399	3.39268	0.0424079	0.95	0.293719
19	14336703	14336873	rs11670064	Alt	T	-0.06	0.987229	0.881958	0.0352413	1.02	0.894013
19	14336703	14336873	rs11670064	Ref	G	-0.09	1.08439	0.971605	0.0499158	1
5	42939580	42939750	rs1167418372	Alt	T	-0.14	2.59173	2.37953	0.047522	0.78	0.00588859
5	42939580	42939750	rs1167418372	Ref	A	0.21	9.39779	8.87921	0.0335063	1
7	119789805	119789975	rs116864428	Alt	A	0.25	4.10901	3.81578	0.0635816	1.01	0.954039
7	119789805	119789975	rs116864428	Ref	G	0.24	3.81708	3.53731	0.0622268	1
7	120598332	120598502	rs116874936	Alt	C	0.63	32.3281	31.2014	0.0528533	1.43	0.0124999
7	120598332	120598502	rs116874936	Alt	G	0.44	32.4739	31.3447	0.0364577	1.25	0.00729685
7	120598332	120598502	rs116874936	Ref	T	0.11	1.53264	1.38721	0.0515366	1
5	43000696	43000866	rs116884586	Alt	A	0.35	26.0322	25.0322	0.0328895	0.88	0.0157539
5	43000696	43000866	rs116884586	Ref	G	0.53	47.5505	46.1198	0.0363159	1
2	217750740	217750910	rs11689753	Alt	A	0.25	13.769	13.0954	0.0323075	1.09	0.0217163
2	217750740	217750910	rs11689753	Alt	T	0.29	13.4777	12.8127	0.0379255	1.12	0.00242565
2	217750740	217750910	rs11689753	Ref	G	0.12	1.82989	1.6633	0.048521	1
7	120187907	120188077	rs116904098	Alt	A	-0.31	13.6289	12.9598	0.0408321	0.78	0.00355326
7	120187907	120188077	rs116904098	Ref	C	0.06	0.996416	0.89023	0.0341258	1
7	119901875	119902045	rs116930961	Alt	G	-0.11	0.86714	0.77173	0.0736242	1.02	0.518011
7	119901875	119902045	rs116930961	Ref	A	-0.13	1.19355	1.07286	0.0726318	1
2	217712535	217712705	rs11693177	Alt	T	0.02	0.310363	0.267888	0.0359902	1.15	0.0799297
2	217712535	217712705	rs11693177	Ref	C	-0.18	4.74559	4.42342	0.0415743	1
5	43073845	43074015	rs116951270	Alt	C	-0.32	17.9686	17.1707	0.0363514	0.88	0.00286242
5	43073845	43074015	rs116951270	Ref	T	-0.13	3.08235	2.84332	0.0384993	1
16	86503341	86503511	rs1169644	Alt	A	-0.31	5.54671	5.18597	0.0664526	0.92	0.0155082
16	86503341	86503511	rs1169644	Alt	C	-0.07	1.05012	0.940451	0.0429631	1.09	0.0516568
16	86503341	86503511	rs1169644	Alt	T	-0.33	11.7173	11.1158	0.0468051	0.91	0.0416905
16	86503341	86503511	rs1169644	Ref	G	-0.19	3.84555	3.56362	0.0502354	1
20	35049172	35049342	rs11696652	Alt	G	0.15	2.20064	2.01013	0.0537664	0.86	0.248658
20	35049172	35049342	rs11696652	Ref	T	0.37	12.1469	11.5288	0.051255	1
12	121203737	121203907	rs1169722	Alt	A	-0.14	3.36629	3.11104	0.0404213	0.74	0.0112457
12	121203737	121203907	rs1169722	Alt	T	-0.25	8.25094	7.7791	0.0436159	0.69	0.00438375
12	121203737	121203907	rs1169722	Ref	G	0.28	17.1181	16.339	0.0329583	1
12	121250138	121250308	rs1169809	Alt	A	0.09	1.91299	1.74063	0.0344805	0.88	0.0171788
12	121250138	121250308	rs1169809	Alt	C	0.3	18.9529	18.1262	0.0327038	1.02	0.486662
12	121250138	121250308	rs1169809	Ref	G	0.27	16.0595	15.3094	0.03255	1
20	15319171	15319341	rs116981213	Alt	C	0.62	6.71774	6.30578	0.11924	1.33	0.000506309
20	15319171	15319341	rs116981213	Alt	G	0.32	1.84317	1.67578	0.129295	1.08	0.038717
20	15319171	15319341	rs116981213	Ref	A	0.2	0.786151	0.697156	0.147015	1
20	34962058	34962228	rs11698868	Alt	T	-0.05	0.51679	0.451909	0.0446257	1.01	0.195788
20	34962058	34962228	rs11698868	Ref	C	-0.06	1.1952	1.07436	0.0341595	1
8	80576767	80576937	rs117017148	Alt	G	0.05	0.654797	0.577261	0.0403945	1.27	0.0148337
8	80576767	80576937	rs117017148	Ref	A	-0.29	8.29216	7.81905	0.0498414	1
5	42970947	42971117	rs117022093	Alt	T	0.02	0.244963	0.211118	0.0394649	0.95	0.0429451
5	42970947	42971117	rs117022093	Ref	C	0.1	1.76796	1.60546	0.0403497	1
10	20984669	20984839	rs117023276	Alt	A	0.44	19.1962	18.3631	0.0478783	1.55	0.00731733
10	20984669	20984839	rs117023276	Ref	G	-0.2	6.91333	6.49414	0.037656	1
22	29797524	29797694	rs11702929	Alt	C	-0.02	0.227642	0.195443	0.0323984	0.92	0.0691215
22	29797524	29797694	rs11702929	Ref	T	0.11	1.97772	1.80162	0.0430438	1
5	43075063	43075233	rs117031590	Alt	G	0.37	25.913	24.9151	0.0342562	1.36	0.00086036
5	43075063	43075233	rs117031590	Alt	T	0.38	14.9647	14.2503	0.047454	1.38	0.0155183
5	43075063	43075233	rs117031590	Ref	A	-0.08	1.48697	1.34447	0.0370002	1
20	14926892	14927062	rs117042785	Alt	G	-0.16	3.77684	3.49938	0.0417133	0.61	0.00196224
20	14926892	14927062	rs117042785	Ref	A	0.56	43.9666	42.6064	0.0397609	1
4	4635769	4635939	rs1171127800	Alt	C	0.4	18.0283	17.2282	0.0449162	1.24	0.0154523
[truncated: 12,214 more rows]

## Sheet: MPRA_allelic_statistics
ID	comb	SNP	chr	pos	ref_allele	alt_allele	allele	window	strand	haplotype	A_Ctrl_Mean	A_Exp_Mean	A_log2FC	A_log2FC_SE	A_logP	A_logPadj_BH	A_logPadj_BF	B_Ctrl_Mean	B_Exp_Mean	B_log2FC	B_log2FC_SE	B_logP	B_logPadj_BH	B_logPadj_BF	Log2Skew	Skew_SE	skewStat	Skew_logP	Skew_logFDR	Skew_logFDR_act
rs1000013156_Ref_G	rs1000013156_center_fwd_NA	rs1000013156	12	121228455	G	A	ref	center	fwd	NA	1476.03	2760.58	0.902709	0.061837	47.54	46.1102	43.6874	480.791	741.724	0.62672	0.105944	8.48062	8.0002	4.62802	-0.278678	0.1091	-2.55434	1.9731	1.70829	1.76951
rs10002090_Ref_T	rs10002090_center_fwd_NA	rs10002090	4	56993426	T	C	ref	center	fwd	NA	1640.47	1598.31	-0.0320608	0.0516998	0.271509	0.234219	0	1775.91	1630.11	-0.113417	0.0517671	1.54579	1.39908	0	-0.0828884	0.0720491	-1.15044	0.602127	0.494867	NA
rs1000613_Ref_C	rs1000613_center_fwd_NA	rs1000613	5	104604349	C	T	ref	center	fwd	NA	4159.38	3292.16	-0.333873	0.0364149	19.3194	18.4823	15.4668	3856.07	4162.63	0.112293	0.0337458	3.05752	2.81949	0	0.443864	0.0474823	9.34798	20.049	18.8752	18.9533
rs10008114_Ref_C	rs10008114_center_fwd_NA	rs10008114	4	4631051	C	T	ref	center	fwd	NA	2842.42	2419.05	-0.233783	0.0554764	4.60069	4.28589	0.748088	2732.56	3220.07	0.236503	0.0621265	3.85146	3.56925	0	0.468667	0.0720852	6.50157	10.0997	9.35604	9.43409
rs10008529_Ref_C	rs10008529_center_fwd_NA	rs10008529	4	111876444	C	T	ref	center	fwd	NA	3816.74	3338	-0.189195	0.0380597	6.17649	5.78777	2.32389	2862.38	2252.05	-0.342253	0.0423165	15.2169	14.4952	11.3643	-0.154756	0.0524724	-2.94929	2.49688	2.19142	2.25885
rs10008693_Ref_G	rs10008693_center_fwd_NA	rs10008693	4	111846397	G	A	ref	center	fwd	NA	5427.72	5999.53	0.146615	0.0306369	5.76824	5.39701	1.91563	4483.22	6224.66	0.472866	0.0329893	45.8718	44.4721	42.0192	0.324276	0.0436587	7.42754	12.9561	12.0505	12.1285
rs10013623_Ref_G	rs10013623_center_fwd_NA	rs10013623	4	4630764	G	A	ref	center	fwd	NA	3912.65	3847.7	-0.0177404	0.0355188	0.209396	0.179753	0	4506.31	4215.89	-0.0899815	0.0326693	2.2305	2.03809	0	-0.0746645	0.0520882	-1.43342	0.818909	0.678741	0.720159
rs10019912_Ref_C	rs10019912_center_fwd_NA	rs10019912	4	167917445	C	T	ref	center	fwd	NA	1379.09	1405.51	0.0249744	0.0759317	0.129464	0.110024	0	2219.41	2718.99	0.293208	0.0498297	8.39796	7.92147	4.54535	0.267683	0.082839	3.23136	2.90938	2.5685	2.64029
rs10022279_Ref_T	rs10022279_center_fwd_NA	rs10022279	4	4633645	T	C	ref	center	fwd	NA	3259.42	2489.79	-0.381134	0.0468807	15.3667	14.6406	11.5141	2644.31	2589.32	-0.0315906	0.0550036	0.247384	0.213143	0	0.347341	0.0661187	5.2533	6.82565	6.24147	6.31952
rs10023009_Ref_G	rs10023009_center_fwd_NA	rs10023009	4	57018172	G	C	ref	center	fwd	NA	3338.03	3051.17	-0.134109	0.0386016	3.29038	3.03933	0	3486.5	5188.92	0.572568	0.0446941	36.8459	35.6296	32.9933	0.70427	0.0541054	13.0166	38.0069	36.0712	36.1492
rs10024868_Ref_T	rs10024868_center_fwd_NA	rs10024868	4	175012575	T	C	ref	center	fwd	NA	2680.48	2334.67	-0.197646	0.0425434	5.47002	5.1136	1.61742	3421.66	3133.67	-0.122981	0.0410869	2.55896	2.348	0	0.0733331	0.0549263	1.33512	0.740317	0.611804	0.650922
rs10025409_Ref_A	rs10025409_center_fwd_NA	rs10025409	4	111869398	A	G	ref	center	fwd	NA	4522.76	3736.32	-0.278277	0.0352586	14.5283	13.8305	10.6757	4049.45	4666.37	0.201699	0.0332661	8.87472	8.37582	5.02212	0.478355	0.0466949	10.2443	23.9011	22.564	22.642
rs10026856_Ref_A	rs10026856_center_fwd_NA	rs10026856	4	4630825	A	T	ref	center	fwd	NA	6027.51	6744.64	0.164329	0.0310981	6.89879	6.48024	3.04619	5894.89	6758.27	0.19402	0.034054	7.91492	7.45564	4.06232	0.0275906	0.0449717	0.613509	0.267977	0.211242	0.230222
rs10026915_Ref_C	rs10026915_center_fwd_NA	rs10026915	4	56991605	C	A	ref	center	fwd	NA	5316.11	6884.12	0.371902	0.0482364	13.9002	13.2216	10.0476	5552.53	5699.39	0.041353	0.0342185	0.64425	0.567443	0	-0.332285	0.0529637	-6.27382	9.45309	8.73972	8.81777
rs10027314_Ref_G	rs10027314_center_fwd_NA	rs10027314	4	4675667	G	C	ref	center	fwd	NA	2836.91	3901.3	0.465259	0.0515394	18.7544	17.9337	14.9018	3546.95	3586.06	0.0151503	0.0434401	0.138306	0.117588	0	-0.453703	0.0624483	-7.26526	12.4291	11.5493	11.6273
rs10030566_Ref_A	rs10030566_center_fwd_NA	rs10030566	4	111876275	A	T	ref	center	fwd	NA	657.326	763.865	0.226734	0.0794192	2.36603	2.16618	0	681.661	545.563	-0.299461	0.0856468	3.32655	3.07361	0	-0.52756	0.1213	-4.34922	4.86449	4.39228	4.47033
rs10034395_Ref_G	rs10034395_center_fwd_NA	rs10034395	4	56996965	G	A	ref	center	fwd	NA	4310.22	4630.15	0.101436	0.0319843	2.81905	2.59382	0	3736.42	4750.75	0.342436	0.042784	14.9186	14.2061	11.066	0.237231	0.0497387	4.76954	5.73366	5.21392	5.29197
rs10035536_Ref_C	rs10035536_center_fwd_NA	rs10035536	5	104462176	C	A	ref	center	fwd	NA	3458.69	2962.65	-0.225582	0.0377825	8.62627	8.13924	4.77367	2569.34	2659.29	0.0581984	0.0414618	0.794744	0.705262	0	0.282929	0.0540158	5.23789	6.78935	6.20758	6.28563
rs10035851_Ref_C	rs10035851_center_fwd_NA	rs10035851	5	104687455	C	T	ref	center	fwd	NA	895.874	926.525	0.0504491	0.0775525	0.28789	0.248501	0	668.308	763.241	0.191456	0.0769711	1.89046	1.71983	0	0.139062	0.10587	1.31351	0.723514	0.597735	NA
rs10037808_Ref_A	rs10037808_center_fwd_NA	rs10037808	5	104456058	A	G	ref	center	fwd	NA	2516.09	3122.07	0.310352	0.0498425	9.32192	8.80685	5.46932	3251.77	3015.98	-0.110737	0.0372927	2.52525	2.31587	0	-0.422359	0.0562098	-7.51397	13.2414	12.319	12.3971
rs10041167_Ref_G	rs10041167_center_fwd_NA	rs10041167	5	23296685	G	T	ref	center	fwd	NA	3350.36	2980.33	-0.170501	0.0546429	2.74309	2.52245	0	2685.54	2125.58	-0.333534	0.0491852	10.9237	10.3503	7.07114	-0.163383	0.0641465	-2.54703	1.96399	1.70004	1.7613
rs10041776_Ref_C	rs10041776_center_fwd_NA	rs10041776	5	115518988	C	T	ref	center	fwd	NA	1484.38	1716.77	0.198606	0.0649175	2.65402	2.43822	0	2314.17	2061.42	-0.167399	0.0514674	2.94165	2.71017	0	-0.365019	0.0788153	-4.63133	5.4397	4.93581	5.01385
rs10043901_Ref_T	rs10043901_center_fwd_NA	rs10043901	5	104749333	T	C	ref	center	fwd	NA	555.164	506.426	-0.13827	0.104416	0.731822	0.647187	0	342.471	313.324	-0.100178	0.110649	0.437386	0.381481	0	0.0344412	0.155236	0.221864	0.0838517	0.0642174	NA
rs10046033_Ref_A	rs10046033_center_fwd_NA	rs10046033	5	104642445	A	T	ref	center	fwd	NA	3553.11	4270.34	0.271829	0.0339695	14.9127	14.2005	11.0601	3178.18	3248.99	0.029881	0.0363894	0.385564	0.335246	0	-0.243968	0.0489213	-4.98695	6.21225	5.66008	5.73813
rs10051990_Ref_T	rs10051990_center_fwd_NA	rs10051990	5	43048203	T	G	ref	center	fwd	NA	4370.28	3999.14	-0.128882	0.0331561	3.9938	3.70528	0.141198	4641.85	4098.8	-0.177083	0.0328658	7.14735	6.71853	3.29475	-0.0498294	0.0443867	-1.12262	0.582364	0.476913	0.509985
rs10053368_Ref_A	rs10053368_center_fwd_NA	rs10053368	5	104579057	A	G	ref	center	fwd	NA	2548.52	2442.67	-0.0606387	0.0468146	0.709479	0.626842	0	3257.1	3403.51	0.0627264	0.0384616	0.987521	0.882191	0	0.121317	0.0572997	2.11723	1.46547	1.24987	NA
rs10053371_Ref_A	rs10053371_center_fwd_NA	rs10053371	5	104579085	A	T	ref	center	fwd	NA	1399.06	1642.15	0.235898	0.0512869	5.37327	5.02093	1.52067	1637.3	1564.09	-0.0651152	0.0543831	0.636063	0.559874	0	-0.302835	0.0730112	-4.14778	4.47403	4.02964	4.10769
rs10054331_Ref_C	rs10054331_center_fwd_NA	rs10054331	5	43052814	C	T	ref	center	fwd	NA	3303.58	3947.16	0.257121	0.0428672	8.69968	8.20851	4.84708	3553.4	3958.75	0.157266	0.0430316	3.58919	3.32168	0	-0.101449	0.0573041	-1.77036	1.11539	0.93693	0.98654
rs10054977_Ref_T	rs10054977_center_fwd_NA	rs10054977	5	104579135	T	G	ref	center	fwd	NA	2795.12	4121.95	0.553957	0.0413989	40.1071	38.8248	36.2545	2206.09	2402.14	0.116653	0.0502835	1.69151	1.53414	0	-0.440769	0.0664938	-6.62872	10.4703	9.70609	9.78414
rs1005633_Ref_C	rs1005633_center_fwd_NA	rs1005633	10	114301788	C	A	ref	center	fwd	NA	3094.18	2790.54	-0.151047	0.0450624	3.09559	2.85556	0	3568.71	4520.85	0.340644	0.0581862	8.31986	7.84593	4.46725	0.489575	0.0648044	7.55466	13.3768	12.4491	12.5272
rs10056822_Ref_G	rs10056822_center_fwd_NA	rs10056822	5	43084309	G	A	ref	center	fwd	NA	3562.14	2915.81	-0.291528	0.0378453	13.877	13.1997	10.0244	4388.87	3759.22	-0.225542	0.0402111	7.6913	7.24141	3.8387	0.0636184	0.05163	1.2322	0.661791	0.546193	0.582007
rs10057469_Ref_G	rs10057469_center_fwd_NA	rs10057469	5	104583048	G	T	ref	center	fwd	NA	2733.95	2770.34	0.0206377	0.0501039	0.167227	0.142845	0	2631.9	3586.92	0.451159	0.0458445	22.1255	21.2138	18.2729	0.428391	0.0653515	6.55519	10.2552	9.50266	9.58071
rs10059171_Ref_G	rs10059171_center_fwd_NA	rs10059171	5	23327874	G	A	ref	center	fwd	NA	1661.03	1647.07	-0.0140109	0.0649339	0.0813589	0.0683495	0	1625.12	1557.91	-0.064592	0.0574092	0.584126	0.512568	0	-0.0521672	0.0765215	-0.681732	0.305037	0.242707	NA
rs10059643_Ref_G	rs10059643_center_fwd_NA	rs10059643	5	104584139	G	A	ref	center	fwd	NA	5500.01	6419.34	0.21772	0.0349522	9.32866	8.81309	5.47606	3130.77	3744.01	0.258466	0.0397704	10.0922	9.54808	6.23958	0.039101	0.0503857	0.776035	0.358796	0.287473	0.311487
rs10059898_Ref_G	rs10059898_center_fwd_NA	rs10059898	5	104578565	G	A	ref	center	fwd	NA	2964.5	4027.91	0.44177	0.0465834	20.609	19.7392	16.7564	2728.47	3837.34	0.484983	0.0439137	27.6302	26.5972	23.7776	0.0411919	0.0607503	0.678054	0.303	0.241215	0.262153
rs10060837_Ref_C	rs10060837_center_fwd_NA	rs10060837	5	104602143	C	A	ref	center	fwd	NA	1658.57	1386.08	-0.258343	0.0557788	5.44019	5.08502	1.58758	1930.85	2053.55	0.0871086	0.0519488	1.02883	0.920413	0	0.343028	0.0686515	4.99666	6.23409	5.68023	5.75828
rs10064210_Ref_G	rs10064210_center_fwd_NA	rs10064210	5	43098438	G	A	ref	center	fwd	NA	4494.54	6749.27	0.586826	0.126244	5.47543	5.11867	1.62283	3400.73	5247.26	0.625798	0.152752	4.37792	4.07278	0.525317	0.0375461	0.137618	0.272829	0.105139	0.0800375	0.0890517
rs10064425_Ref_T	rs10064425_center_fwd_NA	rs10064425	5	104563989	T	C	ref	center	fwd	NA	2874.03	2565.31	-0.161656	0.0425842	3.83278	3.55184	0	3401.81	3378.78	-0.0079818	0.0356649	0.0846455	0.0713216	0	0.151149	0.0507031	2.98106	2.54174	2.23277	2.3011
rs10064760_Ref_A	rs10064760_center_fwd_NA	rs10064760	5	104564774	A	G	ref	center	fwd	NA	2980.69	2885.42	-0.044679	0.0641683	0.313136	0.270421	0	4834.79	3877.42	-0.317669	0.0486794	10.1696	9.62304	6.317	-0.276102	0.0657565	-4.19886	4.57144	4.12176	4.19981
rs10065718_Ref_A	rs10065718_center_fwd_NA	rs10065718	5	104701020	A	T	ref	center	fwd	NA	3670.36	3733.64	0.0228952	0.0391057	0.253185	0.218151	0	2630.55	2693.88	0.0368633	0.0435655	0.400702	0.348874	0	0.0128086	0.0531572	0.240956	0.0917353	0.0702863	NA
rs10069663_Ref_G	rs10069663_center_fwd_NA	rs10069663	5	104563897	G	A	ref	center	fwd	NA	3216.09	3285.18	0.0312131	0.0412545	0.347473	0.300976	0	3276.03	2908.64	-0.176439	0.0486935	3.53659	3.27184	0	-0.211303	0.0575414	-3.67219	3.61893	3.22801	3.30412
rs1007090128_Ref_C	rs1007090128_center_fwd_NA	rs1007090128	2	130845818	C	T	ref	center	fwd	NA	5732.27	6082.69	0.0846	0.0363461	1.70045	1.54251	0	4787.61	4900.11	0.0357881	0.0390479	0.444427	0.387445	0	-0.0495993	0.0466929	-1.06225	0.54042	0.441341	NA
rs10071470_Ref_T	rs10071470_center_fwd_NA	rs10071470	5	42921827	T	G	ref	center	fwd	NA	4209.1	4912.1	0.224119	0.0484289	5.43229	5.0774	1.57969	4188.22	5231.98	0.322238	0.0591733	7.28727	6.85283	3.43466	0.0971573	0.0646958	1.50176	0.875625	0.728079	0.771403
rs10071534_Ref_T	rs10071534_center_fwd_NA	rs10071534	5	42921971	T	C	ref	center	fwd	NA	4583.34	4434.53	-0.0478578	0.0331289	0.828064	0.735723	0	3709.03	5441.96	0.549556	0.0348383	55.3314	53.7487	51.4788	0.59493	0.0446404	13.3272	39.7934	37.8149	37.8929
rs10071791_Ref_T	rs10071791_center_fwd_NA	rs10071791	5	43098017	T	C	ref	center	fwd	NA	5701.25	5064.1	-0.168117	0.035327	5.71071	5.34234	1.85811	5346.85	6418.88	0.26505	0.0316775	16.2289	15.4736	12.3763	0.430731	0.0435721	9.88548	22.3176	21.0259	21.104
rs10072849_Ref_C	rs10072849_center_fwd_NA	rs10072849	5	104582921	C	T	ref	center	fwd	NA	2192.09	2146.26	-0.034387	0.0549089	0.274785	0.237163	0	2207.69	2951.19	0.424743	0.0543266	14.2714	13.5798	10.4188	0.458728	0.0723252	6.34258	9.64598	8.92688	9.00493
rs10075330_Ref_T	rs10075330_center_fwd_NA	rs10075330	5	104528754	T	C	ref	center	fwd	NA	4319.49	4814.65	0.152868	0.034393	5.05554	4.71712	1.20294	4629.4	4478.25	-0.0484178	0.033715	0.821091	0.729126	0	-0.202966	0.0472248	-4.29786	4.76333	4.30197	4.38002
rs10076011_Ref_A	rs10076011_center_fwd_NA	rs10076011	5	104675657	A	G	ref	center	fwd	NA	3332.54	3044.1	-0.125519	0.0387981	2.91519	2.68538	0	4034.94	3278.25	-0.293633	0.0379604	13.9863	13.3049	10.1337	-0.16985	0.0533621	-3.18297	2.83633	2.50059	2.57211
rs10076839_Ref_G	rs10076839_center_fwd_NA	rs10076839	5	104673267	G	A	ref	center	fwd	NA	2055.85	1966.07	-0.0626309	0.0576598	0.556919	0.488229	0	2188.67	2414.62	0.146093	0.0499569	2.46199	2.25636	0	0.206562	0.068045	3.03566	2.61978	2.30272	2.3722
rs10077219_Ref_G	rs10077219_center_fwd_NA	rs10077219	5	43034187	G	A	ref	center	fwd	NA	1062.63	920.361	-0.214452	0.0691767	2.71336	2.49418	0	1148.54	1013.6	-0.181533	0.0658437	2.23411	2.04146	0	0.031788	0.0917622	0.346417	0.137255	0.105264	0.116424
rs1009274_Ref_A	rs1009274_center_fwd_NA	rs1009274	10	8615131	A	T	ref	center	fwd	NA	3566.48	2953.42	-0.26601	0.0386814	11.2136	10.6289	7.36097	3290.97	3479.39	0.0847502	0.035637	1.75946	1.59746	0	0.348148	0.0521882	6.671	10.5951	9.8216	9.89965
rs10094054_Ref_T	rs10094054_center_fwd_NA	rs10094054	8	105508863	T	A	ref	center	fwd	NA	3483.3	3651.42	0.0663168	0.0358223	1.19293	1.07233	0	2014.55	2134.17	0.0731157	0.048331	0.884964	0.78784	0	0.00244823	0.0583658	0.0419464	0.0147795	0.0116502	NA
rs1010160250_Ref_T	rs1010160250_center_fwd_NA	rs1010160250	6	30865824	T	A	ref	center	fwd	NA	2913.89	3313.95	0.192171	0.0411431	5.5228	5.16365	1.6702	2318.35	2069.04	-0.16427	0.0625034	2.06629	1.88388	0	-0.35741	0.0653957	-5.46534	7.33534	6.72822	6.80627
rs1010728_Ref_G	rs1010728_center_fwd_NA	rs1010728	4	77936107	G	A	ref	center	fwd	NA	1673.76	1637.73	-0.0267928	0.0702452	0.153111	0.130436	0	2819.13	3082.38	0.127485	0.0452638	2.31381	2.11719	0	0.149504	0.0710272	2.10488	1.4522	1.23867	1.29374
rs1012287901_Ref_G	rs1012287901_center_fwd_NA	rs1012287901	17	47601101	G	A	ref	center	fwd	NA	3306.57	3044.82	-0.121767	0.038495	2.80674	2.58207	0	2219.56	2221.69	0.00430103	0.0575737	0.0266645	0.0223404	0	0.125446	0.0622344	2.01571	1.35822	1.15335	1.20675
rs10129320_Ref_C	rs10129320_center_fwd_NA	rs10129320	14	62695894	C	T	ref	center	fwd	NA	3722.94	4957.78	0.419124	0.0319117	38.6765	37.4203	34.8239	2670.43	3044.66	0.192453	0.0398343	5.8677	5.49266	2.0151	-0.227639	0.049224	-4.62455	5.42549	4.9221	5.00015
rs10131782_Ref_C	rs10131782_center_fwd_NA	rs10131782	14	40881903	C	T	ref	center	fwd	NA	3981.78	3979.67	-0.0028195	0.0337306	0.0299399	0.0249372	0	2949.96	3941.41	0.420385	0.06016	11.554	10.9587	7.70141	0.422578	0.0612486	6.89938	11.2821	10.4767	10.5547
rs10133981_Ref_G	rs10133981_center_fwd_NA	rs10133981	14	77269450	G	T	ref	center	fwd	NA	4493.49	4025	-0.160276	0.0478299	3.09404	2.85422	0	4889.9	4029.15	-0.275993	0.0353784	14.2123	13.5237	10.3597	-0.116554	0.0513772	-2.2686	1.63278	1.40112	1.45857
rs10134847_Ref_T	rs10134847_center_fwd_NA	rs10134847	14	40914429	T	C	ref	center	fwd	NA	6914.77	7430.13	0.102693	0.0386476	2.10347	1.91864	0	5638.54	4967.08	-0.18459	0.0321751	8.01619	7.5525	4.16359	-0.288608	0.0461216	-6.25755	9.40775	8.69681	8.77486
rs1013789825_Ref_C	rs1013789825_center_fwd_NA	rs1013789825	11	60540956	C	A	ref	center	fwd	NA	1854.8	1612.79	-0.208175	0.0549306	3.82164	3.54146	0	1809.44	1802.28	0.0101134	0.050534	0.0750082	0.0629257	0	0.215375	0.0756228	2.84801	2.35661	2.0609	2.12666
rs10138748_Ref_C	rs10138748_center_fwd_NA	rs10138748	14	40949289	C	A	ref	center	fwd	NA	2914.36	2879.89	-0.0192589	0.0390427	0.206339	0.177022	0	2175	1932.92	-0.173321	0.0539537	2.88066	2.65245	0	-0.157432	0.0593205	-2.65392	2.09929	1.82452	1.88719
rs10141625_Ref_T	rs10141625_center_fwd_NA	rs10141625	14	40916635	T	C	ref	center	fwd	NA	2653.53	2593.68	-0.0307498	0.0458707	0.298752	0.257689	0	2205.79	2027.09	-0.114384	0.0464893	1.85772	1.68925	0	-0.0852569	0.0617279	-1.38117	0.776698	0.643701	NA
rs10141814_Ref_C	rs10141814_center_fwd_NA	rs10141814	14	40885076	C	A	ref	center	fwd	NA	3125.58	3238.96	0.0566053	0.0425481	0.736619	0.651688	0	2815.64	2743.64	-0.0395372	0.040072	0.489708	0.427581	0	-0.098312	0.0580449	-1.69372	1.04423	0.873995	NA
rs10141926_Ref_C	rs10141926_center_fwd_NA	rs10141926	14	40885212	C	T	ref	center	fwd	NA	3190.08	3658.3	0.194588	0.0466627	4.51646	4.20524	0.663854	1852.47	1656.97	-0.153062	0.0510201	2.56872	2.35732	0	-0.348576	0.0652476	-5.34236	7.03742	6.44223	6.52028
rs10142044_Ref_A	rs10142044_center_fwd_NA	rs10142044	14	40885421	A	G	ref	center	fwd	NA	2970.65	2699.54	-0.144336	0.0395566	3.57933	3.31244	0	2967.29	2613.1	-0.182347	0.0404869	5.17568	4.83204	1.32308	-0.0395226	0.0548272	-0.720857	0.326981	0.261004	0.28302
rs10143161_Ref_G	rs10143161_center_fwd_NA	rs10143161	14	40968175	G	A	ref	center	fwd	NA	2409.21	2313.12	-0.0616632	0.0422144	0.841355	0.748182	0	1658.18	1809.84	0.124903	0.0478994	2.04011	1.85979	0	0.184468	0.0614009	3.00433	2.57484	2.26104	NA
rs10143655_Ref_C	rs10143655_center_fwd_NA	rs10143655	14	77295360	C	T	ref	center	fwd	NA	4519.36	61380.3	3.76366	0.262714	45.8227	44.4245	41.9701	4043.61	42296.8	3.38685	0.260906	37.8052	36.5705	33.9526	-0.378062	0.266387	-1.41922	0.807337	0.669624	0.710709
rs10147741_Ref_T	rs10147741_center_fwd_NA	rs10147741	14	40883413	T	A	ref	center	fwd	NA	2719.96	3474.77	0.352113	0.0449573	14.3192	13.6268	10.4666	2392.64	1974.26	-0.275012	0.0468402	8.36405	7.88857	4.51145	-0.628435	0.058773	-10.6926	25.9576	24.5581	24.6361
rs10148207_Ref_A	rs10148207_center_fwd_NA	rs10148207	5	42934964	A	G	ref	center	fwd	NA	3590.67	4075.4	0.189797	0.0349503	7.25023	6.81811	3.39762	3662.29	3520.33	-0.0543859	0.0394663	0.774193	0.686432	0	-0.245054	0.0522509	-4.68996	5.56342	5.05346	5.13151
rs10164430_Ref_C	rs10164430_center_fwd_NA	rs10164430	2	29645751	C	T	ref	center	fwd	NA	6204.17	5665.04	-0.129726	0.0315311	4.41064	4.1039	0.558037	5397.68	5127.29	-0.0782099	0.0315044	1.88452	1.71447	0	0.0496381	0.0441255	1.12493	0.583995	0.478343	0.511393
rs10168705_Ref_A	rs10168705_center_fwd_NA	rs10168705	2	157950296	A	G	ref	center	fwd	NA	2614.19	2477.64	-0.0776308	0.0561836	0.777144	0.689047	0	3154.34	2705.67	-0.218997	0.0504982	4.83976	4.51244	0.987158	-0.142292	0.0640827	-2.22045	1.57858	1.35278	1.40941
rs10169305_Ref_G	rs10169305_center_fwd_NA	rs10169305	2	23487353	G	A	ref	center	fwd	NA	4569.04	5132.56	0.172549	0.0316999	7.28125	6.8474	3.42865	4166.3	5565.42	0.415987	0.0325724	36.6242	35.4114	32.7715	0.241184	0.0437566	5.51196	7.44994	6.83769	6.91574
rs10170591_Ref_T	rs10170591_center_fwd_NA	rs10170591	2	217712219	T	C	ref	center	fwd	NA	5677.43	6128.66	0.111157	0.0311721	3.4406	3.18174	0	4391.33	3813.78	-0.199988	0.0375565	6.99587	6.5737	3.14326	-0.311945	0.0445683	-6.99927	11.5895	10.7593	10.8373
rs10170886_Ref_G	rs10170886_center_fwd_NA	rs10170886	2	157972851	G	A	ref	center	fwd	NA	3219.48	3309.9	0.0388609	0.0509321	0.351185	0.304552	0	3276.15	3432.93	0.071736	0.035782	1.34695	1.21458	0	0.0313409	0.0546715	0.573259	0.246823	0.192592	NA
rs10171199_Ref_A	rs10171199_center_fwd_NA	rs10171199	2	157956376	A	G	ref	center	fwd	NA	2327.25	1849.89	-0.33171	0.0523282	9.63601	9.10909	5.78341	2342.18	2059.23	-0.182415	0.049918	3.58856	3.32111	0	0.148058	0.065277	2.26816	1.63228	1.40088	1.45835
rs10173216_Ref_T	rs10173216_center_fwd_NA	rs10173216	2	4852066	T	C	ref	center	fwd	NA	1664.14	1525.72	-0.130177	0.0570472	1.64792	1.49409	0	2063.52	2718.15	0.398909	0.0514469	14.0497	13.3664	10.1971	0.528242	0.0705109	7.49163	13.1674	12.2515	12.3295
rs10173724_Ref_C	rs10173724_center_fwd_NA	rs10173724	2	4811089	C	A	ref	center	fwd	NA	2598.45	2625.71	0.0199694	0.0412786	0.201662	0.172912	0	4856	4782.15	-0.0236852	0.0313804	0.346419	0.300058	0	-0.0467378	0.0481792	-0.970083	0.478855	0.388357	NA
rs10173912_Ref_C	rs10173912_center_fwd_NA	rs10173912	2	4861727	C	T	ref	center	fwd	NA	6636.07	7464.18	0.171464	0.036404	5.60613	5.24251	1.75353	3868.33	4029.21	0.0558315	0.0412902	0.753699	0.667615	0	-0.118649	0.0490222	-2.42031	1.80946	1.55917	1.61921
rs10175615_Ref_G	rs10175615_center_fwd_NA	rs10175615	2	157954711	G	A	ref	center	fwd	NA	5414.58	5908.87	0.127203	0.036915	3.24465	2.9967	0	5470.27	5490.25	0.0073898	0.0308569	0.0911245	0.0769849	0	-0.122081	0.0449905	-2.71349	2.17667	1.89593	1.95963
rs10175709_Ref_G	rs10175709_center_fwd_NA	rs10175709	2	157926364	G	T	ref	center	fwd	NA	3401.01	6690.09	0.978294	0.0609976	57.1605	55.5513	53.3079	3859.97	5168.96	0.425227	0.0453312	20.1825	19.3217	16.3299	-0.55636	0.0903566	-6.15738	9.13103	8.43363	8.51168
rs10177946_Ref_A	rs10177946_center_fwd_NA	rs10177946	2	29661397	A	G	ref	center	fwd	NA	2209.84	2222.63	-0.0022523	0.0439333	0.0181298	0.0152826	0	2454.67	1875.48	-0.387165	0.0653571	8.50236	8.0211	4.64976	-0.388163	0.0718311	-5.40383	7.18553	6.58661	6.66466
rs10180203_Ref_A	rs10180203_center_fwd_NA	rs10180203	2	29646940	A	G	ref	center	fwd	NA	2327.97	2139.12	-0.121025	0.0465812	2.02813	1.84868	0	2271.99	2964.63	0.384578	0.0456355	16.4508	15.6901	12.5982	0.503639	0.0605925	8.31191	16.0261	14.99	15.068
rs10182925_Ref_A	rs10182925_center_fwd_NA	rs10182925	2	29647339	A	C	ref	center	fwd	NA	5040.33	7272.16	0.526545	0.037626	43.7718	42.4151	39.9192	4692.08	7011.45	0.580893	0.0467556	34.7132	33.5436	30.8606	0.0532241	0.0533538	0.997569	0.496907	0.403132	0.432245
rs1018601024_Ref_G	rs1018601024_center_fwd_NA	rs1018601024	2	131466981	G	A	ref	center	fwd	NA	4009.99	3367.46	-0.25323	0.0441416	8.01546	7.55195	4.16286	5142.57	4078.45	-0.327637	0.0327622	22.819	21.8954	18.9664	-0.0772524	0.0536249	-1.44061	0.824791	0.683389	0.725094
rs10187271_Ref_A	rs10187271_center_fwd_NA	rs10187271	2	4856957	A	G	ref	center	fwd	NA	2957.83	2865.61	-0.048505	0.0443677	0.561801	0.492503	0	2394.84	2277.99	-0.062692	0.0434862	0.825647	0.733419	0	-0.016203	0.0618868	-0.261817	0.100473	0.0770094	NA
rs1019112952_Ref_G	rs1019112952_center_fwd_NA	rs1019112952	16	86428482	G	A	ref	center	fwd	NA	4312.13	4789.06	0.152844	0.042224	3.5305	3.26625	0	4148.53	3563.7	-0.219541	0.0494413	5.04683	4.70901	1.19423	-0.37457	0.0548367	-6.83064	11.073	10.2765	10.3545
rs10193134_Ref_T	rs10193134_center_fwd_NA	rs10193134	2	4857940	T	C	ref	center	fwd	NA	2844.3	2705.08	-0.0760886	0.0417796	1.16382	1.04522	0	2932.45	3129.52	0.0911625	0.0412803	1.56514	1.41676	0	0.16549	0.0557674	2.96751	2.52255	2.21518	NA
rs10193850_Ref_C	rs10193850_center_fwd_NA	rs10193850	2	23487572	C	T	ref	center	fwd	NA	3343.33	4470.43	0.419135	0.0340016	34.1878	33.0253	30.3352	3833.54	3097.39	-0.305934	0.0475398	9.90937	9.37163	6.05677	-0.72583	0.0512348	-14.1667	44.8321	42.6923	42.7703
rs10203893_Ref_C	rs10203893_center_fwd_NA	rs10203893	2	157950399	C	T	ref	center	fwd	NA	3832.46	3809.2	-0.0121227	0.0422483	0.11117	0.0942845	0	3999.03	4609.55	0.202498	0.0377191	7.10044	6.67349	3.24784	0.213574	0.0539443	3.95916	4.1237	3.69732	3.77495
rs10205337_Ref_T	rs10205337_center_fwd_NA	rs10205337	2	4866915	T	A	ref	center	fwd	NA	221.655	160.66	-0.453106	0.156372	2.4248	2.22122	0	288.945	242.191	-0.245656	0.131362	1.21131	1.08937	0	0.203863	0.207682	0.981612	0.486395	0.393596	0.422389
rs10208318_Ref_T	rs10208318_center_fwd_NA	rs10208318	2	23487330	T	C	ref	center	fwd	NA	4188.11	4968.64	0.243379	0.0349899	11.4549	10.8625	7.60234	4736.85	5250.56	0.147656	0.0322133	5.34026	4.98908	1.48765	-0.097035	0.0438672	-2.21202	1.56919	1.34418	1.40085
rs10211283_Ref_G	rs10211283_center_fwd_NA	rs10211283	2	239516473	G	A	ref	center	fwd	NA	4919.15	3970.02	-0.30731	0.0412809	13.0114	12.3646	9.15877	4231.5	3473.46	-0.283419	0.0432218	10.2614	9.71071	6.40877	0.022055	0.0516854	0.426717	0.174194	0.13434	0.147594
rs1022286_Ref_G	rs1022286_center_fwd_NA	rs1022286	4	118330943	G	A	ref	center	fwd	NA	1081.51	846.498	-0.352442	0.0689472	6.496	6.09362	2.64339	904.125	850.296	-0.0968179	0.0699462	0.779097	0.690739	0	0.252687	0.093068	2.71508	2.17876	1.89771	1.9614
rs10238108_Ref_T	rs10238108_center_fwd_NA	rs10238108	7	93564129	T	A	ref	center	fwd	NA	3501.22	3352.48	-0.0624553	0.0402335	0.918703	0.818702	0	3111.06	2954.58	-0.0718903	0.0425886	1.03902	0.930015	0	-0.0108893	0.0539387	-0.201884	0.0757167	0.0580535	NA
rs10240028_Ref_A	rs10240028_center_fwd_NA	rs10240028	7	93555699	A	G	ref	center	fwd	NA	3730.58	4174.75	0.161277	0.0428518	3.776	3.49873	0	2799.37	2945.21	0.0719568	0.0422402	1.05319	0.943133	0	-0.0911406	0.0559714	-1.62834	0.98526	0.822691	0.869429
rs10249404_Ref_G	rs10249404_center_fwd_NA	rs10249404	7	66581737	G	A	ref	center	fwd	NA	5928.37	6239.06	0.0731146	0.0312196	1.71707	1.55777	0	4887.23	4542.13	-0.1051	0.0527264	1.3351	1.20352	0	-0.179557	0.0536982	-3.34382	3.08284	2.73007	NA
rs10253830_Ref_G	rs10253830_center_fwd_NA	rs10253830	7	93582342	G	A	ref	center	fwd	NA	4182.1	3532.6	-0.24428	0.0442743	7.46344	7.02164	3.61083	4852.21	4063.44	-0.256999	0.0380873	10.8231	10.2534	6.97048	-0.0143621	0.0506717	-0.283434	0.109666	0.0828941	0.0925722
rs10263336_Ref_G	rs10263336_center_fwd_NA	rs10263336	7	16930414	G	C	ref	center	fwd	NA	3449.02	3352.85	-0.0448085	0.0360903	0.668782	0.590003	0	3582.48	3295.3	-0.12196	0.039052	2.74713	2.52624	0	-0.0792901	0.0502738	-1.57717	0.94022	0.782613	0.828512
rs10267274_Ref_G	rs10267274_center_fwd_NA	rs10267274	7	16931265	G	C	ref	center	fwd	NA	2654.47	2230.67	-0.251842	0.0476777	6.89393	6.47562	3.04133	3853.47	2811.85	-0.45422	0.0601836	13.352	12.6922	9.49942	-0.203636	0.0646105	-3.15175	2.78969	2.45848	2.52973
rs10270704_Ref_A	rs10270704_center_fwd_NA	rs10270704	7	93549397	A	T	ref	center	fwd	NA	3210.01	2950.38	-0.126325	0.0487093	2.0222	1.84312	0	3250.89	4184.51	0.361243	0.0350086	24.2365	23.2766	20.3839	0.488286	0.0552485	8.838	18.0112	16.9088	16.9868
rs10275619_Ref_T	rs10275619_center_fwd_NA	rs10275619	7	16924149	T	G	ref	center	fwd	NA	3426.14	4171.64	0.281414	0.0396983	11.8688	11.2619	8.01619	2840.87	3432.76	0.270793	0.050859	6.99442	6.57242	3.14181	-0.013662	0.0592184	-0.230706	0.0874894	0.0668662	0.0746842
rs10276006_Ref_G	rs10276006_center_fwd_NA	rs10276006	7	16933453	G	T	ref	center	fwd	NA	4732.21	4346.37	-0.119215	0.0346841	3.23074	2.98343	0	3854.1	4173.33	0.108998	0.0373899	2.44916	2.24445	0	0.226763	0.0521402	4.3491	4.86424	4.39228	4.47033
rs10279956_Ref_G	rs10279956_center_fwd_NA	rs10279956	7	16934321	G	A	ref	center	fwd	NA	2141.17	3396.21	0.661732	0.0490554	40.7438	39.4497	36.8912	2517.39	2779.25	0.14688	0.0423614	3.27927	3.02899	0	-0.517235	0.0674966	-7.66313	13.7412	12.7945	12.8725
rs1029322242_Ref_A	rs1029322242_center_fwd_NA	rs1029322242	3	13889832	A	G	ref	center	fwd	NA	3877.22	4552.66	0.230711	0.0342408	10.794	10.2255	6.94141	710.815	908.289	0.358709	0.0690554	6.68772	6.27694	2.83511	0.128348	0.070167	1.82917	1.17151	0.987077	1.03756
rs1029580_Ref_A	rs1029580_center_fwd_NA	rs1029580	7	16926157	A	T	ref	center	fwd	NA	2850.42	3814.52	0.422534	0.0530135	14.8006	14.0928	10.948	3027.23	4748.12	0.639705	0.0352815	72.745	70.8906	68.8924	0.217229	0.061836	3.51298	3.35348	2.98224	3.05732
rs1031877274_Ref_A	rs1031877274_center_fwd_NA	rs1031877274	5	42930387	A	G	ref	center	fwd	NA	4208.08	7305.38	0.793029	0.038926	91.5345	89.3813	87.6819	4001.77	6491.93	0.695095	0.0530082	38.5567	37.3043	34.7041	-0.10163	0.057807	-1.7581	1.10385	0.927525	0.976522
rs1036045891_Ref_G	rs1036045891_center_fwd_NA	rs1036045891	10	53406725	G	A	ref	center	fwd	NA	2953.74	2955.04	-0.0098362	0.0388828	0.0967518	0.0816938	0	3320.78	3254.59	-0.0360655	0.0367381	0.486449	0.424885	0	-0.0278699	0.0559516	-0.498106	0.208724	0.162072	NA
rs1036672180_Ref_C	rs1036672180_center_fwd_NA	rs1036672180	11	128760520	C	T	ref	center	fwd	NA	932.127	897.514	-0.0603723	0.0665864	0.43821	0.382201	0	785.148	1568.31	0.985916	0.0601012	59.749	58.094	55.8964	1.04534	0.0907356	11.5208	29.9842	28.4125	28.4906
rs10428319_Ref_G	rs10428319_center_fwd_NA	rs10428319	4	77922471	G	C	ref	center	fwd	NA	5164.37	5263.27	0.0251721	0.0418768	0.261398	0.22526	0	4960.7	4769.59	-0.0580775	0.031929	1.16167	1.04323	0	-0.0837956	0.0474538	-1.76583	1.11113	0.933142	NA
rs1042914028_Ref_T	rs1042914028_center_fwd_NA	rs1042914028	17	47426720	T	A	ref	center	fwd	NA	840.15	2818.62	1.7435	0.188954	19.5559	18.7125	15.7033	1037.73	949.501	-0.120499	0.0655164	1.18123	1.06159	0	-1.86544	0.158383	-11.778	31.2951	29.6867	29.7648
rs10437999_Ref_T	rs10437999_center_fwd_NA	rs10437999	14	40910465	T	C	ref	center	fwd	NA	1966.28	1750.79	-0.167583	0.0497412	3.12255	2.8806	0	4059.55	4275.81	0.0689985	0.0326695	1.45986	1.3196	0	0.235565	0.0550083	4.28236	4.73302	4.27348	4.35153
rs10450453_Ref_T	rs10450453_center_fwd_NA	rs10450453	10	44627483	T	C	ref	center	fwd	NA	3199.3	3588.66	0.165165	0.0393543	4.56762	4.2544	0.71502	2402.59	2158.65	-0.150858	0.0439907	3.21816	2.9715	0	-0.317253	0.0543034	-5.84222	8.28812	7.63088	7.70893
rs1045135992_Ref_C	rs1045135992_center_fwd_NA	rs1045135992	18	2703307	C	T	ref	center	fwd	NA	2907.87	2401.01	-0.270997	0.0414027	10.2267	9.67761	6.37405	3918.75	3485.11	-0.161849	0.0372313	4.8603	4.53194	1.0077	0.106857	0.0558617	1.91288	1.25365	1.05899	1.11011
rs1045559093_Ref_C	rs1045559093_center_fwd_NA	rs1045559093	10	20973247	C	T	ref	center	fwd	NA	2281.85	2313.49	0.0202239	0.0430506	0.194826	0.167041	0	325.449	302.534	-0.113747	0.121261	0.458142	0.399347	0	-0.143702	0.100257	-1.43334	0.818838	0.678741	NA
rs10473634_Ref_C	rs10473634_center_fwd_NA	rs10473634	5	23310706	C	G	ref	center	fwd	NA	3846.9	3377.4	-0.179898	0.0379302	5.67632	5.30988	1.82372	2715.97	2588.76	-0.0693244	0.0455964	0.891393	0.793773	0	0.109192	0.0573125	1.90521	1.24601	1.05234	1.10352
rs10479296_Ref_G	rs10479296_center_fwd_NA	rs10479296	5	104579742	G	A	ref	center	fwd	NA	1744.93	1708.3	-0.0473164	0.0488992	0.477259	0.416499	0	1856.53	1830.36	-0.0193584	0.0475897	0.164835	0.14072	0	0.0252896	0.0704767	0.358836	0.142838	0.10898	NA
rs10479298_Ref_G	rs10479298_center_fwd_NA	rs10479298	5	104588520	G	A	ref	center	fwd	NA	3404.68	3001.48	-0.182834	0.0400178	5.3094	4.95952	1.4568	3261.91	3944.8	0.271446	0.0454779	8.62142	8.13496	4.76882	0.451535	0.0553936	8.1514	15.444	14.4328	14.5109
rs10479300_Ref_T	rs10479300_center_fwd_NA	rs10479300	5	104665076	T	C	ref	center	fwd	NA	1287.25	1218.56	-0.091315	0.061354	0.864348	0.769128	0	1171.05	2077.45	0.824561	0.0656931	35.4101	34.2253	31.5575	0.913171	0.0884106	10.3287	24.282	22.9203	22.9983
rs10485013_Ref_A	rs10485013_center_fwd_NA	rs10485013	6	22647828	A	G	ref	center	fwd	NA	3809.31	3794.94	-0.0087849	0.0377282	0.0883733	0.0746716	0	2838.69	2967.69	0.0621476	0.0381061	0.987546	0.882191	0	0.0694273	0.050389	1.37783	0.774027	0.641256	NA
rs10504289_Ref_G	rs10504289_center_fwd_NA	rs10504289	8	59240515	G	C	ref	center	fwd	NA	4350.98	4414.47	0.0240823	0.0341868	0.317708	0.274459	0	4073.2	8984.79	1.14329	0.0549147	95.5391	93.3496	91.6865	1.12002	0.0542016	20.664	94.1359	91.1721	91.2502
rs1050462855_Ref_G	rs1050462855_center_fwd_NA	rs1050462855	10	53273694	G	A	ref	center	fwd	NA	4259.83	4063.81	-0.0684165	0.0330524	1.41501	1.2778	0	3598.26	3842.71	0.0929299	0.0375994	1.87122	1.70194	0	0.158946	0.0461546	3.44378	3.24136	2.87673	NA
rs10507029_Ref_A	rs10507029_center_fwd_NA	rs10507029	12	94143349	A	G	ref	center	fwd	NA	4194.6	5637.68	0.4261	0.0377097	28.8794	27.8209	25.0268	3022.49	3510.05	0.209537	0.041164	6.44672	6.04665	2.59412	-0.219448	0.051653	-4.2485	4.66715	4.21256	4.29061
rs10516580_Ref_A	rs10516580_center_fwd_NA	rs10516580	4	111856038	A	G	ref	center	fwd	NA	4201.18	5046.93	0.267434	0.0315076	16.6771	15.9094	12.8245	3853.21	3049.05	-0.342803	0.0388225	17.9802	17.182	14.1276	-0.612871	0.0482462	-12.703	36.2447	34.4232	34.5012
rs10521173_Ref_T	rs10521173_center_fwd_NA	rs10521173	16	48972501	T	C	ref	center	fwd	NA	4133.31	3574.07	-0.208321	0.035589	8.31758	7.84389	4.46498	5378.71	4904.21	-0.130687	0.0312951	4.52765	4.21593	0.675049	0.0756274	0.0448109	1.6877	1.03873	0.869194	0.916666
rs1053701_Ref_C	rs1053701_center_fwd_NA	rs1053701	1	150622225	C	T	ref	center	fwd	NA	2531.58	2934.32	0.207552	0.038616	7.1153	6.68762	3.26269	3858.51	4518.77	0.223906	0.0477492	5.5618	5.20016	1.7092	0.0122492	0.0578856	0.21161	0.0796619	0.0610142	0.0682123
rs1055683713_Ref_A	rs1055683713_center_fwd_NA	rs1055683713	10	53205102	A	C	ref	center	fwd	NA	3280.03	3321.08	0.0153289	0.0359754	0.1739	0.148548	0	2960.28	3240.23	0.126471	0.039676	2.84328	2.61677	0	0.108838	0.0528241	2.06039	1.40493	1.19549	1.2497
rs1056008_Ref_T	rs1056008_center_fwd_NA	rs1056008	12	553672	T	C	ref	center	fwd	NA	3439.06	4034.32	0.231679	0.036632	9.59513	9.06933	5.74252	3431.03	8050.27	1.23008	0.141872	17.3658	16.5825	13.5132	0.997127	0.104813	9.51343	20.734	19.5287	19.6067
rs10566416_Ref_ATAGT	rs10566416_center_fwd_NA	rs10566416	12	86205327	ATAGT	A	ref	center	fwd	NA	739.093	752.059	0.0229494	0.0778526	0.114547	0.0971132	0	738.814	1080.79	0.523041	0.0655905	14.8148	14.1062	10.9622	0.504811	0.116085	4.34864	4.86333	4.39184	4.46989
rs10624998_Ref_G	rs10624998_center_fwd_NA	rs10624998	3	63495957	G	GGAT	ref	center	fwd	NA	4534.05	4586.61	0.0191963	0.0378724	0.213073	0.182939	0	7387.11	7480.93	0.0204363	0.0330756	0.270298	0.233229	0	-0.0007704	0.0452833	-0.0170118	0.00593496	0.00467431	NA
rs10635550_Ref_T	rs10635550_center_fwd_NA	rs10635550	6	158346817	T	TTGA	ref	center	fwd	NA	3452.67	2743.15	-0.327348	0.0532487	9.10404	8.59865	5.25144	3215.24	3112.99	-0.049555	0.0423649	0.615981	0.541461	0	0.274072	0.0612202	4.47682	5.12054	4.63194	4.70999
rs10651180_Ref_G	rs10651180_center_fwd_NA	rs10651180	2	29657425	G	GAT	ref	center	fwd	NA	3198.57	3710.72	0.213868	0.038446	7.57601	7.12963	3.72341	4120.73	4177.91	0.0202442	0.0335659	0.262466	0.226139	0	-0.195423	0.0473072	-4.13093	4.44213	3.99992	4.07797
rs10688607_Ref_T	rs10688607_center_fwd_NA	rs10688607	11	63121516	T	TTAG	ref	center	fwd	NA	4161.12	5012.88	0.261313	0.0329081	14.6967	13.993	10.8441	4710.67	5934.38	0.332736	0.0410201	15.3012	14.5766	11.4486	0.0683897	0.0513811	1.33103	0.737123	0.609659	0.648191
rs10708178_Ref_CA	rs10708178_center_fwd_NA	rs10708178	4	77999098	CA	C	ref	center	fwd	NA	3156.11	2626.82	-0.261311	0.0408995	9.77767	9.24465	5.92507	2881.8	2629.49	-0.132004	0.0405045	2.95153	2.71959	0	0.126952	0.0538863	2.35593	1.73338	1.4914	1.5495
rs10736724_Ref_G	rs10736724_center_fwd_NA	rs10736724	11	63145786	G	A	ref	center	fwd	NA	4349.91	4558.98	0.0624189	0.0329228	1.23679	1.11287	0	3571.75	3873.06	0.115568	0.0342308	3.13366	2.89118	0	0.0514168	0.0462145	1.11257	0.575292	0.471443	0.503579
rs10756293_Ref_C	rs10756293_center_fwd_NA	rs10756293	9	11817835	C	G	ref	center	fwd	NA	3840.66	3989.44	0.0539659	0.0372841	0.830388	0.737858	0	3782.93	3902.86	0.0451173	0.0508778	0.425738	0.371151	0	-0.0105416	0.0547516	-0.192535	0.071951	0.0553878	NA
rs1076904_Ref_C	rs1076904_center_fwd_NA	rs1076904	3	50615038	C	T	ref	center	fwd	NA	2880.85	2727.7	-0.0769508	0.0451748	1.05309	0.943069	0	3140	3082.5	-0.0347539	0.0467615	0.33975	0.294237	0	0.039622	0.0631895	0.627034	0.275203	0.217211	NA
rs10784816_Ref_A	rs10784816_center_fwd_NA	rs10784816	12	69976596	A	T	ref	center	fwd	NA	3033.09	3683.89	0.284216	0.0371219	13.7181	13.046	9.86549	2650.14	2476.19	-0.102508	0.0423414	1.81028	1.64518	0	-0.389465	0.0535306	-7.27556	12.4622	11.5776	11.6557
rs10792387_Ref_T	rs10792387_center_fwd_NA	rs10792387	11	63106015	T	C	ref	center	fwd	NA	2373.95	2745.44	0.211283	0.039744	6.9746	6.55341	3.122	2934.06	3817.2	0.386413	0.0365762	25.3617	24.3736	21.5091	0.172861	0.0555917	3.10948	2.72719	2.40267	2.47302
rs10802026_Ref_G	rs10802026_center_fwd_NA	rs10802026	1	118387552	G	A	ref	center	fwd	NA	370.432	432.796	0.208686	0.101304	1.40452	1.26783	0	232.674	254.561	0.128312	0.162547	0.366645	0.318514	0	-0.086612	0.177057	-0.489175	0.204316	0.158209	NA
rs10803350_Ref_T	rs10803350_center_fwd_NA	rs10803350	1	15086217	T	C	ref	center	fwd	NA	3279.35	3720.03	0.185385	0.0477877	3.97989	3.69196	0.127288	4416.2	5875.39	0.413085	0.0339816	33.274	32.1298	29.4214	0.223907	0.0508418	4.40399	4.97356	4.49455	4.5726
rs10809613_Ref_C	rs10809613_center_fwd_NA	rs10809613	9	11842434	C	T	ref	center	fwd	NA	5657.14	6181	0.126634	0.0327865	3.94965	3.66314	0.0970479	5336.47	6466.75	0.277255	0.0587933	5.61834	5.25416	1.76573	0.14871	0.0597785	2.48768	1.89083	1.63205	1.69291
rs10826864_Ref_G	rs10826864_center_fwd_NA	rs10826864	10	30755280	G	A	ref	center	fwd	NA	4163.25	4766.82	0.198252	0.0344865	8.04601	7.5809	4.19341	2681.54	2935.93	0.134924	0.0397777	3.15867	2.91496	0	-0.0649358	0.0502552	-1.29212	0.707047	0.584201	0.621109
rs10849860_Ref_T	rs10849860_center_fwd_NA	rs10849860	12	121230451	T	C	ref	center	fwd	NA	5124.36	8064.22	0.653361	0.0585099	28.2265	27.1811	24.3739	4944.46	8324.33	0.74961	0.0495971	50.8827	49.3817	47.0301	0.0946447	0.0663467	1.42652	0.813273	0.673828	0.715231
rs10856991_Ref_C	rs10856991_center_fwd_NA	rs10856991	4	77963993	C	A	ref	center	fwd	NA	4192.34	3574.88	-0.229824	0.0352572	10.1487	9.60297	6.29607	4248.87	4486.43	0.07953	0.0388073	1.39332	1.25763	0	0.307869	0.0470959	6.53706	10.2025	9.45527	9.53332
rs10873389_Ref_G	rs10873389_center_fwd_NA	rs10873389	14	88066059	G	A	ref	center	fwd	NA	4913.32	5588.12	0.188271	0.0320709	8.3619	7.88652	4.5093	5666.03	6767.16	0.254921	0.0386085	10.394	9.83894	6.54136	0.0644077	0.0457318	1.40838	0.798551	0.662348	0.703333
rs10879068_Ref_G	rs10879068_center_fwd_NA	rs10879068	12	69987387	G	T	ref	center	fwd	NA	4371.7	5844.34	0.415715	0.0458418	18.9183	18.0922	15.0657	3531.94	3951.35	0.160776	0.052486	2.65961	2.44336	0	-0.256666	0.0606877	-4.22928	4.62998	4.17629	4.25434
rs10883987_Ref_C	rs10883987_center_fwd_NA	rs10883987	10	104232960	C	T	ref	center	fwd	NA	3142.35	3868.61	0.29989	0.0364849	15.6898	14.9516	11.8372	3701.08	4998.99	0.430478	0.0362111	31.8645	30.7479	28.0119	0.128555	0.0505751	2.54187	1.95758	1.6945	1.75549
rs10890170_Ref_A	rs10890170_center_fwd_NA	rs10890170	1	41943851	A	C	ref	center	fwd	NA	2040.26	1935.2	-0.0723626	0.0612378	0.624631	0.549532	0	2488.49	2321.91	-0.105587	0.0438974	1.79159	1.62742	0	-0.0361701	0.0685326	-0.527779	0.223551	0.174298	NA
rs10897077_Ref_A	rs10897077_center_fwd_NA	rs10897077	11	60517309	A	C	ref	center	fwd	NA	1787.46	1492.62	-0.258334	0.0527579	6.01093	5.62947	2.15832	1115.28	1001.99	-0.142643	0.0634148	1.61103	1.45962	0	0.116123	0.0775394	1.4976	0.872125	0.725241	0.768621
rs10897358_Ref_A	rs10897358_center_fwd_NA	rs10897358	11	63110260	A	G	ref	center	fwd	NA	2785.95	2338.84	-0.247979	0.0535348	5.44134	5.0861	1.58874	3196.67	2901.52	-0.136665	0.0382161	3.45748	3.19725	0	0.106736	0.0583428	1.82947	1.17179	0.987119	1.03759
rs10897369_Ref_C	rs10897369_center_fwd_NA	rs10897369	11	63124412	C	T	ref	center	fwd	NA	6192.19	5449.75	-0.187537	0.0308766	8.90329	8.40391	5.05069	3543.8	3080.21	-0.201885	0.0367554	7.40243	6.96408	3.54983	-0.015941	0.0447006	-0.356617	0.141837	0.108319	0.120214
rs10900077_Ref_G	rs10900077_center_fwd_NA	rs10900077	10	44608280	G	A	ref	center	fwd	NA	3737.27	3581.03	-0.0713783	0.0372917	1.25482	1.12953	0	3394.77	5382.49	0.665469	0.0504323	39.0297	37.768	35.1771	0.732961	0.0611907	11.9783	32.3356	30.6582	30.7362
rs10900426_Ref_G	rs10900426_center_fwd_NA	rs10900426	1	204878787	G	A	ref	center	fwd	NA	2619.94	2413.91	-0.12607	0.0432681	2.44711	2.24245	0	3201.73	2659.79	-0.270804	0.0549227	6.08639	5.70176	2.23378	-0.149004	0.0657414	-2.26651	1.63041	1.39929	1.45676
rs10900429_Ref_G	rs10900429_center_fwd_NA	rs10900429	1	204891840	G	A	ref	center	fwd	NA	3533.98	4713.75	0.415725	0.0425742	21.7971	20.8925	17.9445	5360.64	5950.7	0.151242	0.0404703	3.73016	3.45541	0	-0.266123	0.0513549	-5.18204	6.65861	6.08222	6.16027
rs10901338_Ref_T	rs10901338_center_fwd_NA	rs10901338	9	131061656	T	C	ref	center	fwd	NA	2084.35	2231.17	0.106812	0.0484156	1.56266	1.41453	0	2225.93	2176.88	-0.0303368	0.0482378	0.276204	0.238349	0	-0.138877	0.0687272	-2.0207	1.36341	1.15752	NA
rs10905401_Ref_C	rs10905401_center_fwd_NA	rs10905401	10	8526553	C	T	ref	center	fwd	NA	4246.05	4131.5	-0.0385094	0.034025	0.588852	0.516789	0	3220.02	3281.59	0.0294867	0.0409672	0.326362	0.282135	0	0.0666604	0.0490753	1.35833	0.758553	0.627061	NA
rs10923562_Ref_G	rs10923562_center_fwd_NA	rs10923562	1	118391737	G	A	ref	center	fwd	NA	4127.17	3299.84	-0.318495	0.0357329	18.3047	17.4964	14.4521	3478.45	2876.24	-0.2723	0.0378793	12.1841	11.565	8.33151	0.0440945	0.048447	0.910158	0.440405	0.355905	0.382682
rs10923565_Ref_A	rs10923565_center_fwd_NA	rs10923565	1	118398865	A	G	ref	center	fwd	NA	4092.77	5013.4	0.293459	0.0484343	8.86315	8.36454	5.01055	3210.24	4409.36	0.456853	0.0405761	28.6804	27.6275	24.8278	0.161163	0.0558579	2.88524	2.40769	2.10854	2.17516
rs10923568_Ref_A	rs10923568_center_fwd_NA	rs10923568	1	118409665	A	G	ref	center	fwd	NA	1004.71	925.176	-0.126735	0.0690017	1.17878	1.05942	0	1041.02	1402.82	0.421422	0.0610165	11.3045	10.7169	7.45186	0.547241	0.0956086	5.72377	7.98218	7.34336	7.42141
rs10923569_Ref_C	rs10923569_center_fwd_NA	rs10923569	1	118409997	C	T	ref	center	fwd	NA	4085.34	3174.28	-0.362685	0.0550424	10.3544	9.80123	6.50179	3743.91	2827.7	-0.401033	0.0402205	22.6894	21.7687	18.8368	-0.0411658	0.0573523	-0.717771	0.325232	0.259621	0.281687
rs10930712_Ref_G	rs10930712_center_fwd_NA	rs10930712	2	175850309	G	A	ref	center	fwd	NA	2858.46	2287.53	-0.317344	0.0447593	11.8726	11.2656	8.01998	3734.38	2718.87	-0.457607	0.045294	23.2712	22.3362	19.4186	-0.142778	0.0565136	-2.52644	1.93845	1.67652	1.73756
rs10930713_Ref_G	rs10930713_center_fwd_NA	rs10930713	2	175851926	G	A	ref	center	fwd	NA	5917.01	6655.26	0.16997	0.0325971	6.73391	6.32132	2.88131	5044.8	6124.35	0.281828	0.0321733	17.7082	16.9167	13.8556	0.110237	0.0433348	2.54385	1.96003	1.69662	1.75764
rs10937880_Ref_C	rs10937880_center_fwd_NA	rs10937880	4	4661155	C	T	ref	center	fwd	NA	3997.04	4887.54	0.287664	0.0336442	16.9105	16.1362	13.0579	3744.76	3048.05	-0.289774	0.0416944	11.4372	10.8451	7.58458	-0.578303	0.0525164	-11.0119	27.4749	26.0117	26.0898
rs10960292_Ref_T	rs10960292_center_fwd_NA	rs10960292	9	11827840	T	C	ref	center	fwd	NA	3942.17	4402.68	0.165203	0.0340798	5.90306	5.5265	2.05046	4652.47	4812.71	0.0484877	0.0383475	0.685971	0.605506	0	-0.118128	0.0502152	-2.35244	1.72931	1.48761	1.54572
rs10976711_Ref_A	rs10976711_center_fwd_NA	rs10976711	9	7995142	A	C	ref	center	fwd	NA	3324.93	4656.5	0.478521	0.0380989	35.4552	34.27	31.6026	3244.63	2984.76	-0.122335	0.0374956	2.95712	2.72455	0	-0.602414	0.0539118	-11.1741	28.2626	26.7662	26.8442
rs11008223_Ref_G	rs11008223_center_fwd_NA	rs11008223	10	30754148	G	A	ref	center	fwd	NA	3770.49	3199.95	-0.240977	0.0370842	10.0897	9.5459	6.23708	5180.22	4341.71	-0.257415	0.0358571	12.1532	11.5349	8.30063	-0.0183073	0.0480882	-0.380702	0.152782	0.116365	0.128977
rs11012419_Ref_C	rs11012419_center_fwd_NA	rs11012419	10	20958026	C	T	ref	center	fwd	NA	4701.59	4770.88	0.0177121	0.0375063	0.196029	0.168049	0	3576.34	3739.91	0.0645998	0.0398398	0.979174	0.874738	0	0.0455725	0.0510369	0.892933	0.429582	0.346608	NA
rs11012422_Ref_G	rs11012422_center_fwd_NA	rs11012422	10	20964964	G	A	ref	center	fwd	NA	3627.43	3299.63	-0.139137	0.03703	3.76528	3.48841	0	3305.05	2765.83	-0.251598	0.0478116	6.84683	6.4302	2.99423	-0.112235	0.0553367	-2.02822	1.37123	1.16419	1.21774
rs11012427_Ref_A	rs11012427_center_fwd_NA	rs11012427	10	20972505	A	G	ref	center	fwd	NA	3293.68	5788.22	0.814157	0.121842	10.6279	10.0649	6.77531	4033.54	7311.6	0.858764	0.0610338	44.2378	42.8735	40.3852	0.0420668	0.109025	0.385846	0.155143	0.118041	0.130741
rs11012428_Ref_C	rs11012428_center_fwd_NA	rs11012428	10	20973552	C	T	ref	center	fwd	NA	1730.51	1263.14	-0.444475	0.054912	15.2397	14.5172	11.3871	1417.45	1757.92	0.298462	0.0506955	8.40625	7.92903	4.55364	0.742574	0.0777183	9.55468	20.9067	19.6833	19.7613
rs11012430_Ref_C	rs11012430_center_fwd_NA	rs11012430	10	20974252	C	T	ref	center	fwd	NA	662.712	667.982	0.0222442	0.0899404	0.094388	0.0796458	0	131.702	113.021	-0.211739	0.233929	0.437243	0.381373	0	-0.224655	0.188487	-1.19189	0.632076	0.520717	NA
rs11012433_Ref_G	rs11012433_center_fwd_NA	rs11012433	10	20974518	G	A	ref	center	fwd	NA	4737.63	5389.53	0.18755	0.0368942	6.43103	6.03143	2.57843	3436.85	2952.28	-0.222811	0.0414521	7.11621	6.68845	3.26361	-0.413093	0.0516206	-8.00247	14.9138	13.9216	13.9997
rs11012434_Ref_T	rs11012434_center_fwd_NA	rs11012434	10	20977017	T	C	ref	center	fwd	NA	3872.29	4416.04	0.191079	0.0351408	7.26741	6.83414	3.41481	3328.79	3202.6	-0.0564662	0.0397186	0.809316	0.718444	0	-0.249751	0.0485976	-5.13917	6.55915	5.98748	6.06553
rs11012436_Ref_G	rs11012436_center_fwd_NA	rs11012436	10	20977665	G	A	ref	center	fwd	NA	2829.29	2894.38	0.0357457	0.0462379	0.357068	0.309925	0	2516.24	2919.39	0.216716	0.0422237	6.5439	6.13975	2.6913	0.17842	0.0575146	3.10217	2.71646	2.39282	2.46318
rs11012437_Ref_C	rs11012437_center_fwd_NA	rs11012437	10	20977905	C	T	ref	center	fwd	NA	2736	2579.17	-0.0856487	0.0435906	1.30599	1.17667	0	4483.26	4543.46	0.0166547	0.0326313	0.214829	0.184401	0	0.100598	0.0491243	2.04783	1.39173	1.18381	NA
rs11012438_Ref_G	rs11012438_center_fwd_NA	rs11012438	10	20978010	G	A	ref	center	fwd	NA	2417.24	2333.61	-0.0487103	0.0597614	0.381924	0.332051	0	2079.59	1882.94	-0.142787	0.0500935	2.35989	2.16052	0	-0.0970114	0.0686673	-1.41277	0.802107	0.665257	0.706185
rs11012439_Ref_T	rs11012439_center_fwd_NA	rs11012439	10	20978014	T	A	ref	center	fwd	NA	1798.98	1798.92	0.00796571	0.0703507	0.0410305	0.0340477	0	2157.12	3277.72	0.609643	0.0422887	46.3881	44.9744	42.5355	0.594006	0.0780398	7.61158	13.5674	12.6317	12.7097
rs11012440_Ref_T	rs11012440_center_fwd_NA	rs11012440	10	20978144	T	C	ref	center	fwd	NA	3877.98	3443.19	-0.181839	0.0373718	5.94281	5.56442	2.09021	3579.91	3507.39	-0.0285051	0.0366862	0.359361	0.312035	0	0.149854	0.0576303	2.60027	2.03082	1.76134	1.8236
rs11012441_Ref_A	rs11012441_center_fwd_NA	rs11012441	10	20978603	A	T	ref	center	fwd	NA	5127.5	7710.65	0.588636	0.180326	2.95964	2.72691	0	3761.62	3395.22	-0.147857	0.113702	0.713393	0.630387	0	-0.737704	0.148234	-4.97663	6.18909	5.63804	5.71609
rs11012442_Ref_A	rs11012442_center_fwd_NA	rs11012442	10	20978860	A	G	ref	center	fwd	NA	4463.35	4243.63	-0.073485	0.0357174	1.40178	1.26534	0	3946.4	3570.39	-0.136688	0.0352499	3.97692	3.68912	0.12432	-0.0646559	0.0481921	-1.34163	0.745412	0.616045	0.655091
rs11012444_Ref_G	rs11012444_center_fwd_NA	rs11012444	10	20979588	G	A	ref	center	fwd	NA	5.54958	2.63491	-1.08615	1.64001	0.294317	0.254225	0	9.63706	13.9074	0.523857	2.16175	0.0923067	0.0779432	0	1.60497	1.65603	0.96917	0.47826	0.38818	NA
rs11012445_Ref_A	rs11012445_center_fwd_NA	rs11012445	10	20979683	A	G	ref	center	fwd	NA	2813.11	4464.22	0.666529	0.0436346	51.9514	50.4296	48.0988	3237.82	4529.91	0.480157	0.0380682	35.7474	34.5536	31.8948	-0.188394	0.0534247	-3.52635	3.37537	3.00228	3.07735
rs11012447_Ref_A	rs11012447_center_fwd_NA	rs11012447	10	20981048	A	C	ref	center	fwd	NA	3491.45	3935.28	0.167562	0.0440929	3.8399	3.55838	0	4067.09	4444.25	0.126716	0.0520984	1.82374	1.65787	0	-0.0432363	0.0626815	-0.689777	0.309507	0.246269	0.267832
rs11012449_Ref_A	rs11012449_center_fwd_NA	rs11012449	10	20981194	A	G	ref	center	fwd	NA	3981.83	3119.5	-0.349636	0.0364976	21.0118	20.1313	17.1592	3152.87	3348.14	0.0852021	0.0389807	1.5401	1.39381	0	0.432385	0.0498644	8.67122	17.369	16.2861	16.3641
rs11012451_Ref_T	rs11012451_center_fwd_NA	rs11012451	10	20981955	T	C	ref	center	fwd	NA	5690.55	5392.32	-0.0758133	0.0346977	1.53923	1.39299	0	4928.69	4848.29	-0.020315	0.0347958	0.25233	0.217395	0	0.0539047	0.0461145	1.16893	0.615411	0.506536	NA
rs11012456_Ref_C	rs11012456_center_fwd_NA	rs11012456	10	20983058	C	T	ref	center	fwd	NA	4597.76	5441.15	0.240566	0.0330531	12.4706	11.8419	8.61804	5013.41	4216.96	-0.24646	0.0377571	10.1747	9.62795	6.32213	-0.488511	0.0497367	-9.82193	22.0429	20.7634	20.8414
rs11012457_Ref_A	rs11012457_center_fwd_NA	rs11012457	10	20983515	A	G	ref	center	fwd	NA	3602.76	3869.34	0.0992365	0.0338977	2.4664	2.26057	0	1560.17	2231.44	0.512327	0.062922	15.4112	14.6838	11.5586	0.407545	0.0667342	6.10698	8.99339	8.30589	8.38394
rs11012458_Ref_C	rs11012458_center_fwd_NA	rs11012458	10	20983789	C	T	ref	center	fwd	NA	3002.58	3307.2	0.138491	0.0371883	3.70763	3.43415	0	3289.07	3796.11	0.212523	0.0384022	7.5048	7.06122	3.65219	0.0729761	0.0506519	1.44074	0.824897	0.683389	0.725094
rs11012459_Ref_A	rs11012459_center_fwd_NA	rs11012459	10	20983963	A	G	ref	center	fwd	NA	2005.9	2460.41	0.293923	0.0462835	9.66832	9.14016	5.81572	2329.41	1977.54	-0.236342	0.0459285	6.57464	6.16909	2.72204	-0.532145	0.0614477	-8.66014	17.3268	16.248	16.3261
rs11012461_Ref_G	rs11012461_center_fwd_NA	rs11012461	10	20986398	G	A	ref	center	fwd	NA	4117.23	4907.11	0.250625	0.0348991	12.1611	11.5424	8.30853	3546.28	2740.36	-0.368203	0.0441573	16.1233	15.3716	12.2707	-0.619199	0.0505076	-12.2595	33.8258	32.057	32.1351
rs11012464_Ref_A	rs11012464_center_fwd_NA	rs11012464	10	20987854	A	T	ref	center	fwd	NA	2437.55	4570.87	0.902156	0.0520488	66.5756	64.8062	62.723	2292.82	2313.06	0.00908456	0.0496499	0.0681255	0.0572178	0	-0.894084	0.0668437	-13.3758	40.0767	38.083	38.161
rs11012465_Ref_G	rs11012465_center_fwd_NA	rs11012465	10	20989679	G	C	ref	center	fwd	NA	3605.89	4356.17	0.277542	0.0367806	13.3475	12.688	9.49493	2961.74	3502.79	0.240404	0.0375636	9.80842	9.27393	5.95582	-0.0393253	0.051308	-0.766455	0.353199	0.283281	0.307071
rs11012466_Ref_T	rs11012466_center_fwd_NA	rs11012466	10	20994009	T	A	ref	center	fwd	NA	2961.17	3156.87	0.0853544	0.0402193	1.47084	1.32957	0	2385.2	1974.69	-0.270778	0.0450036	8.74983	8.25629	4.89723	-0.357599	0.0574793	-6.22135	9.30725	8.60114	8.67919
rs11012467_Ref_G	rs11012467_center_fwd_NA	rs11012467	10	20994691	G	A	ref	center	fwd	NA	1924.71	1770.99	-0.129167	0.0508049	1.95827	1.78354	0	2092.3	1615.42	-0.373241	0.050296	12.9343	12.2911	9.08166	-0.245321	0.0689072	-3.56017	3.43108	3.05388	3.1293
rs11012468_Ref_A	rs11012468_center_fwd_NA	rs11012468	10	20995046	A	G	ref	center	fwd	NA	3338.12	2551.42	-0.385159	0.0593343	10.0702	9.52723	6.21755	2567.93	1841.06	-0.470132	0.0465329	23.2721	22.3368	19.4195	-0.0891015	0.0689267	-1.2927	0.70749	0.584435	0.621322
rs11012469_Ref_G	rs11012469_center_fwd_NA	rs11012469	10	20995510	G	T	ref	center	fwd	NA	3686.79	4533.2	0.294807	0.0340831	17.2869	16.5052	13.4343	3891.49	4240.56	0.124725	0.040735	2.65766	2.44156	0	-0.171724	0.0489075	-3.5112	3.35058	2.98008	3.05517
rs11012472_Ref_G	rs11012472_center_fwd_NA	rs11012472	10	20999162	G	A	ref	center	fwd	NA	1503.79	1945.5	0.364293	0.05195	11.6303	11.0327	7.77765	1877.26	2388.91	0.347731	0.0479792	12.3722	11.7472	8.51962	-0.0178091	0.0680701	-0.261629	0.100394	0.0770094	0.0855315
rs11065496_Ref_G	rs11065496_center_fwd_NA	rs11065496	12	121224379	G	A	ref	center	fwd	NA	3403.96	66626.5	4.29086	0.310606	42.681	41.3486	38.8284	4067.86	72245.8	4.15058	0.31632	38.6055	37.3515	34.7529	-0.141296	0.314506	-0.449265	0.184927	0.143518	0.157124
rs11065497_Ref_A	rs11065497_center_fwd_NA	rs11065497	12	121224567	A	C	ref	center	fwd	NA	2581.66	2612.64	0.017952	0.0495747	0.144322	0.122899	0	3513.49	4182.62	0.251847	0.049491	6.44315	6.04316	2.59055	0.232159	0.0602835	3.85112	3.92967	3.51448	3.59171
rs11076458_Ref_A	rs11076458_center_fwd_NA	rs11076458	16	48972933	A	G	ref	center	fwd	NA	3130.38	3524.17	0.173	0.0424671	4.33475	4.03134	0.482152	4189.03	3766.96	-0.151608	0.0359414	4.6086	4.2933	0.755995	-0.326849	0.0526862	-6.2037	9.25844	8.55631	8.63436
rs11080327_Ref_G	rs11080327_center_fwd_NA	rs11080327	17	35244527	G	A	ref	center	fwd	NA	5333.17	7184.44	0.430588	0.0465675	19.6347	18.7885	15.7821	4599.13	7434.23	0.696685	0.0336616	94.4311	92.251	90.5785	0.263454	0.0508889	5.17703	6.64697	6.07116	6.14921
rs11085889_Ref_T	rs11085889_center_fwd_NA	rs11085889	19	14335558	T	C	ref	center	fwd	NA	4287.12	5451.3	0.343738	0.0352834	21.7007	20.7991	17.8481	3067.65	2703.72	-0.186324	0.0611563	2.63568	2.42093	0	-0.535806	0.0631938	-8.47878	16.6429	15.5911	15.6692
rs11097965_Ref_G	rs11097965_center_fwd_NA	rs11097965	4	77905881	G	T	ref	center	fwd	NA	1838.72	1796.9	-0.0292399	0.0496795	0.254809	0.21951	0	1523.71	1787.31	0.222044	0.0564403	4.07834	3.78607	0.225739	0.248331	0.0724646	3.42692	3.21434	2.85225	2.9263
rs11097980_Ref_C	rs11097980_center_fwd_NA	rs11097980	4	77961653	C	T	ref	center	fwd	NA	2789.84	3600.74	0.368006	0.0356743	24.2231	23.2638	20.3705	3951.79	4927.94	0.316096	0.0475775	10.5148	9.9558	6.66218	-0.0546428	0.0560283	-0.975271	0.482242	0.390999	0.419326
rs11100326_Ref_A	rs11100326_center_fwd_NA	rs11100326	4	139876529	A	G	ref	center	fwd	NA	3948.93	3335.58	-0.244529	0.050243	5.94558	5.56705	2.09297	3791.99	3732.29	-0.024702	0.0393239	0.27581	0.238055	0	0.218745	0.0546683	4.00132	4.20073	3.76927	3.84689
rs111234509_Ref_T	rs111234509_center_fwd_NA	rs111234509	2	29759227	T	C	ref	center	fwd	NA	4667.1	4520.05	-0.0426923	0.0389512	0.563744	0.494196	0	3974.04	3534.83	-0.172993	0.037786	5.3289	4.97854	1.4763	-0.133092	0.0506633	-2.62698	2.06476	1.79265	1.85542
rs111248746_Ref_G	rs111248746_center_fwd_NA	rs111248746	10	8526272	G	C	ref	center	fwd	NA	4087.68	3734.02	-0.129704	0.0414733	2.75361	2.53185	0	4053.97	3896.32	-0.0582481	0.0355983	0.992316	0.886519	0	0.0691942	0.0482229	1.43488	0.820102	0.679354	0.720879
rs111249465_Ref_A	rs111249465_center_fwd_NA	rs111249465	12	121231828	A	G	ref	center	fwd	NA	3056.05	3612.9	0.245667	0.0394298	9.33254	8.81667	5.47994	4114.81	3668.19	-0.166262	0.0624569	2.10974	1.92463	0	-0.413246	0.0645787	-6.39911	9.80608	9.0795	9.15755
rs111256062_Ref_C	rs111256062_center_fwd_NA	rs111256062	10	8531916	C	T	ref	center	fwd	NA	1085.33	1132.71	0.0739729	0.0753351	0.486596	0.424927	0	1373.62	1668.1	0.279352	0.0819485	3.18553	2.94043	0	0.203092	0.102925	1.97321	1.31451	1.11514	1.16781
rs11130931_Ref_G	rs11130931_center_fwd_NA	rs11130931	3	63491781	G	A	ref	center	fwd	NA	3522.51	3528.01	0.0116043	0.035803	0.127348	0.108259	0	3572.25	3152.44	-0.182022	0.0454795	4.2025	3.90457	0.3499	-0.194307	0.0565947	-3.43331	3.22456	2.86175	2.93616
rs11130932_Ref_G	rs11130932_center_fwd_NA	rs11130932	3	63491817	G	A	ref	center	fwd	NA	3006.47	2621.41	-0.195182	0.0651783	2.56096	2.3499	0	3562.98	3374.68	-0.0753933	0.048106	0.931588	0.830939	0	0.116396	0.0681334	1.70835	1.05764	0.885774	0.934078
rs111342912_Ref_G	rs111342912_center_fwd_NA	rs111342912	X	81316813	G	A	ref	center	fwd	NA	4654.76	3765.18	-0.306054	0.0384392	14.7715	14.0648	10.9189	4489.2	4095.59	-0.129792	0.0346738	3.74073	3.4653	0	0.17483	0.0459527	3.80457	3.84755	3.44007	3.51691
rs111348951_Ref_A	rs111348951_center_fwd_NA	rs111348951	12	69945306	A	AG	ref	center	fwd	NA	3804.34	3259.47	-0.226426	0.0430317	6.84584	6.42929	2.99324	2598.14	2437.47	-0.0899328	0.0449807	1.34133	1.20942	0	0.13592	0.0558089	2.43546	1.82761	1.57454	1.63476
rs111356468_Ref_G	rs111356468_center_fwd_NA	rs111356468	X	81052159	G	T	ref	center	fwd	NA	3647.06	3735.48	0.0367075	0.0402417	0.441681	0.385186	0	3233.69	2794.89	-0.211744	0.0481659	4.95786	4.62446	1.10525	-0.250981	0.0561405	-4.47059	5.10788	4.62025	4.6983
rs111442290_Ref_G	rs111442290_center_fwd_NA	rs111442290	10	52505550	G	A	ref	center	fwd	NA	3817.12	4284	0.165816	0.0369088	5.15263	4.8104	1.30003	3906.65	6257.62	0.681136	0.0595287	29.5893	28.5141	25.7367	0.514581	0.0621368	8.28142	15.9147	14.8854	14.9634
rs111538459_Ref_T	rs111538459_center_fwd_NA	rs111538459	3	114197063	T	C	ref	center	fwd	NA	1115.2	1318.96	0.25118	0.056391	5.07479	4.73597	1.22218	1497.85	1844.58	0.296539	0.0486805	8.95142	8.4506	5.09882	0.0431643	0.074424	0.579977	0.250318	0.195729	0.214204
rs111539804_Ref_C	rs111539804_center_fwd_NA	rs111539804	X	81122370	C	G	ref	center	fwd	NA	5169.75	5059.75	-0.0326244	0.033044	0.490131	0.427899	0	3607.94	3077.79	-0.228917	0.0408137	7.69103	7.24123	3.83843	-0.198161	0.0475962	-4.16337	4.50365	4.05838	4.13642
rs111563543_Ref_G	rs111563543_center_fwd_NA	rs111563543	X	80722393	G	A	ref	center	fwd	NA	5234.44	4916.4	-0.0930335	0.0332498	2.28889	2.09318	0	4508.48	5091.4	0.176072	0.0323991	7.25996	6.82727	3.40736	0.267745	0.0431853	6.19992	9.24801	8.54667	8.62472
rs111578962_Ref_G	rs111578962_center_fwd_NA	rs111578962	X	80882474	G	A	ref	center	fwd	NA	1191.82	835.592	-0.511747	0.0954401	7.0845	6.65812	3.2319	793.205	628.994	-0.330136	0.0870331	3.82767	3.5472	0	0.180001	0.113525	1.58556	0.947538	0.788117	0.833877
rs11160332_Ref_A	rs11160332_center_fwd_NA	rs11160332	14	96339641	A	G	ref	center	fwd	NA	3504.22	3213.89	-0.120727	0.0446063	2.16753	1.97904	0	3486.54	4527.77	0.381612	0.0374969	23.6008	22.6562	19.7481	0.499328	0.0550365	9.07267	18.935	17.808	17.886
rs111655365_Ref_T	rs111655365_center_fwd_NA	rs111655365	X	81186664	T	C	ref	center	fwd	NA	3158.64	3587.87	0.190243	0.0367997	6.6299	6.22187	2.7773	2338.78	3123.86	0.406023	0.046314	17.7354	16.9431	13.8828	0.214604	0.0618372	3.47047	3.28437	2.91755	2.99229
rs11167248_Ref_G	rs11167248_center_fwd_NA	rs11167248	20	34950918	G	T	ref	center	fwd	NA	3110.54	3187.4	0.0362294	0.0367875	0.488507	0.426627	0	3360.62	5045.15	0.582808	0.0373514	54.1609	52.5975	50.3083	0.544056	0.049653	10.9571	27.2118	25.7621	25.8402
rs11167252_Ref_GC	rs11167252_center_fwd_NA	rs11167252	20	35015146	GC	G	ref	center	fwd	NA	3305.04	3121.39	-0.081362	0.0487568	1.0215	0.913475	0	4729.05	5108.77	0.111668	0.0543193	1.40006	1.26374	0	0.191341	0.061106	3.13129	2.75936	2.43172	NA
rs11167253_Ref_T	rs11167253_center_fwd_NA	rs11167253	20	35026646	T	C	ref	center	fwd	NA	3662.88	3260.82	-0.169497	0.0424154	4.1912	3.89387	0.338602	3556.52	2975.83	-0.253989	0.0369983	11.1769	10.594	7.32428	-0.0855695	0.05092	-1.68047	1.03214	0.864235	0.911825
rs111695969_Ref_G	rs111695969_center_fwd_NA	rs111695969	2	29708099	G	A	ref	center	fwd	NA	5033.93	4806.4	-0.0641037	0.0313189	1.39065	1.255	0	3841.31	4504.91	0.229431	0.034012	10.817	10.2476	6.9644	0.291424	0.0441916	6.59457	10.3701	9.61223	9.69028
rs11177993_Ref_A	rs11177993_center_fwd_NA	rs11177993	12	69953286	A	G	ref	center	fwd	NA	5619.52	5165.55	-0.120684	0.0333061	3.5366	3.27184	0	2173.26	2284.06	0.0722922	0.0548912	0.726222	0.641995	0	0.191467	0.054481	3.51438	3.35578	2.9838	3.05888
rs11177996_Ref_A	rs11177996_center_fwd_NA	rs11177996	12	69958144	A	G	ref	center	fwd	NA	946.582	640.765	-0.558448	0.0892347	9.40955	8.89056	5.55695	4302.99	4125.88	-0.0652905	0.0398002	0.996066	0.889958	0	0.48683	0.0756676	6.4338	9.90499	9.17336	9.25141
rs11178010_Ref_C	rs11178010_center_fwd_NA	rs11178010	12	69973014	C	T	ref	center	fwd	NA	2919.51	4175.99	0.519628	0.0415741	35.1206	33.9419	31.268	2768.14	3054.6	0.141166	0.0539628	2.05077	1.86938	0	-0.380449	0.0612682	-6.20957	9.27465	8.57173	8.64978
rs111789763_Ref_T	rs111789763_center_fwd_NA	rs111789763	15	68723703	T	C	ref	center	fwd	NA	4277.3	5140.94	0.270261	0.0326615	15.8899	15.1445	12.0373	4617.43	5631.09	0.285191	0.0318834	18.4288	17.6163	14.5762	0.0129234	0.0450767	0.286697	0.111066	0.0838157	0.0936327
rs111816431_Ref_T	rs111816431_center_fwd_NA	rs111816431	X	81278971	T	G	ref	center	fwd	NA	1942.01	1744.84	-0.149188	0.0598953	1.89466	1.72376	0	1823.64	1420.52	-0.358925	0.061218	8.34255	7.86781	4.48995	-0.212527	0.0766871	-2.77135	2.25317	1.96547	2.02956
rs111934512_Ref_T	rs111934512_center_fwd_NA	rs111934512	5	56724745	T	C	ref	center	fwd	NA	2438.33	4006.76	0.709052	0.0470916	50.5069	49.0163	46.6543	2672.62	2677.21	-0.0002885	0.0437595	0.00229079	0.00192445	0	-0.710124	0.0618527	-11.4809	29.7837	28.2236	28.3017
rs11196680_Ref_C	rs11196680_center_fwd_NA	rs11196680	10	114285192	C	A	ref	center	fwd	NA	5613.43	5145.72	-0.117168	0.0316941	3.66092	3.38984	0	6069.2	5433.78	-0.157762	0.0310412	6.42856	6.02918	2.57596	-0.0412203	0.0492075	-0.837683	0.395548	0.31731	0.342532
rs11196687_Ref_G	rs11196687_center_fwd_NA	rs11196687	10	114299969	G	A	ref	center	fwd	NA	4883.86	3541.87	-0.46525	0.0410881	28.9969	27.9357	25.1443	6936.77	5389.04	-0.362931	0.0382854	20.5931	19.7238	16.7404	0.101595	0.0488614	2.07925	1.42488	1.2139	1.2683
rs112007582_Ref_C	rs112007582_center_fwd_NA	rs112007582	4	77917864	C	T	ref	center	fwd	NA	4423.87	8661.8	0.969287	0.190589	6.43628	6.03644	2.58367	5504.42	11014.4	1.00087	0.207039	5.87398	5.49843	2.02138	0.0306683	0.197789	0.155055	0.0571104	0.0444982	0.0489357
rs112046175_Ref_C	rs112046175_center_fwd_NA	rs112046175	5	56731764	C	T	ref	center	fwd	NA	4727.05	4645.6	-0.0279513	0.0354876	0.365613	0.317516	0	4488.01	4607	0.0327542	0.0335677	0.482566	0.421283	0	0.0593935	0.0498612	1.19118	0.631556	0.520451	NA
rs11204665_Ref_A	rs11204665_center_fwd_NA	rs11204665	1	150563873	A	G	ref	center	fwd	NA	5381.62	5030.97	-0.100408	0.0406077	1.87249	1.70294	0	3870.06	4543.97	0.238267	0.0333463	12.0465	11.4326	8.19389	0.336743	0.0514406	6.54625	10.2291	9.48109	9.55914
rs11204689_Ref_C	rs11204689_center_fwd_NA	rs11204689	1	150669683	C	T	ref	center	fwd	NA	3780.25	231282	5.93505	0.36318	59.3037	57.6569	55.4511	2941.42	90872.4	4.94919	0.359776	42.3309	41.0063	38.4783	-0.986885	0.434785	-2.26982	1.63417	1.40197	1.45939
rs11204714_Ref_A	rs11204714_center_fwd_NA	rs11204714	1	150723524	A	C	ref	center	fwd	NA	4157.24	3993.9	-0.0596725	0.0334683	1.1273	1.01102	0	3848.98	5176	0.432383	0.0324459	39.7884	38.5136	35.9358	0.490528	0.0451301	10.8692	26.7914	25.3591	25.4372
rs11204715_Ref_C	rs11204715_center_fwd_NA	rs11204715	1	150723615	C	T	ref	center	fwd	NA	3209.53	3023.01	-0.084894	0.0381742	1.5824	1.43281	0	3423.28	3086.26	-0.15189	0.0500325	2.61999	2.40635	0	-0.0699411	0.0568621	-1.23001	0.660165	0.544772	0.580607
rs11204727_Ref_G	rs11204727_center_fwd_NA	rs11204727	1	150787503	G	T	ref	center	fwd	NA	2857.11	5253.59	0.881057	0.0534995	60.2092	58.5445	56.3566	3633.24	5082.87	0.482013	0.0476861	23.2933	22.3578	19.4407	-0.401661	0.0653598	-6.14538	9.09814	8.40386	8.48191
rs112062503_Ref_G	rs112062503_center_fwd_NA	rs112062503	X	80438579	G	A	ref	center	fwd	NA	3955.94	4770.71	0.270344	0.0421543	9.84621	9.31089	5.99361	3164	4399.12	0.477546	0.0378063	35.8485	34.6519	31.9959	0.205201	0.0533642	3.84529	3.91934	3.50538	3.58261
rs112083280_Ref_T	rs112083280_center_fwd_NA	rs112083280	2	157937045	T	A	ref	center	fwd	NA	3623.61	5924.82	0.711033	0.0412079	65.9872	64.2301	62.1346	3978.2	5617.06	0.496583	0.0518367	21.012	20.1313	17.1594	-0.216793	0.0579138	-3.74338	3.74098	3.34186	3.41833
rs112111156_Ref_AATGTGTGT	rs112111156_center_fwd_NA	rs112111156	2	4898177	AATGTGTGT	A	ref	center	fwd	NA	3765.2	3545.12	-0.0893302	0.0349876	1.97168	1.796	0	3313.88	3886.29	0.227373	0.0366523	9.25789	8.746	5.40529	0.314603	0.0478593	6.5735	10.3085	9.55423	9.63228
rs112116223_Ref_T	rs112116223_center_fwd_NA	rs112116223	3	114199596	T	C	ref	center	fwd	NA	3297.7	3966.73	0.26351	0.0342915	13.8133	13.1386	9.96074	3182.06	3772.6	0.252597	0.0418895	8.78544	8.29057	4.93284	-0.0118624	0.0533114	-0.222511	0.0841169	0.0642174	0.0718945
rs112126308_Ref_C	rs112126308_center_fwd_NA	rs112126308	5	43090196	C	T	ref	center	fwd	NA	956.517	1058.68	0.145542	0.0757554	1.26197	1.13593	0	1379.87	1262.09	-0.125853	0.0571069	1.56007	1.41224	0	-0.272908	0.0859485	-3.17525	2.82475	2.4897	NA
rs112189726_Ref_G	rs112189726_center_fwd_NA	rs112189726	4	167914350	G	A	ref	center	fwd	NA	5600.11	4519.38	-0.309014	0.0519671	8.56192	8.07825	4.70931	4379.55	3695.69	-0.243235	0.0372187	10.1973	9.64954	6.34469	0.0637418	0.054003	1.18034	0.623669	0.513377	0.548388
rs112208963_Ref_C	rs112208963_center_fwd_NA	rs112208963	4	77849109	C	T	ref	center	fwd	NA	4535.36	5517.45	0.289234	0.0325856	18.1597	17.3557	14.3071	3869.56	4136.05	0.102447	0.0368782	2.26205	2.06801	0	-0.187592	0.0491529	-3.8165	3.86852	3.45821	3.53505
rs112241031_Ref_T	rs112241031_center_fwd_NA	rs112241031	X	81387147	T	A	ref	center	fwd	NA	2049.81	2105.62	0.0323919	0.0634194	0.215011	0.18455	0	2718.89	2694.96	-0.0090273	0.042693	0.0795959	0.0667123	0	-0.0414147	0.0724215	-0.571856	0.246096	0.19222	NA
rs1122510_Ref_A	rs1122510_center_fwd_NA	rs1122510	5	43100103	A	G	ref	center	fwd	NA	3922.15	2913.79	-0.430454	0.0472882	19.0553	18.2261	15.2027	4841.27	5496.07	0.179372	0.0336415	7.0123	6.58933	3.1597	0.609423	0.0532792	11.4383	29.57	28.0212	28.0993
rs112258524_Ref_A	rs112258524_center_fwd_NA	rs112258524	5	51872469	A	G	ref	center	fwd	NA	7064.47	5446.05	-0.378503	0.0361841	24.8822	23.907	21.0296	5104.63	5316.1	0.0638987	0.0306938	1.4276	1.28931	0	0.44053	0.0468966	9.39364	20.2369	19.056	19.1341
rs11231311_Ref_G	rs11231311_center_fwd_NA	rs11231311	11	63034067	G	A	ref	center	fwd	NA	3381.52	8947.97	1.40352	0.0730305	81.5849	79.593	77.7323	4702.13	11562.2	1.2975	0.0850205	51.8565	50.3397	48.0039	-0.107813	0.113471	-0.95013	0.465915	0.377382	0.404954
rs11231314_Ref_A	rs11231314_center_fwd_NA	rs11231314	11	63038075	A	T	ref	center	fwd	NA	4605.65	4824.35	0.0662067	0.0441833	0.872845	0.776903	0	3841.95	3428.85	-0.157382	0.0353925	5.05958	4.72109	1.20698	-0.225796	0.0519893	-4.34312	4.85241	4.38463	4.46268
rs11231315_Ref_G	rs11231315_center_fwd_NA	rs11231315	11	63038079	G	A	ref	center	fwd	NA	4603.16	5816.31	0.333737	0.0341756	21.7998	20.895	17.9472	3570.46	3439.58	-0.0550974	0.0426484	0.706874	0.624532	0	-0.391031	0.0495252	-7.89559	14.5392	13.5596	13.6376
rs11231319_Ref_G	rs11231319_center_fwd_NA	rs11231319	11	63041584	G	A	ref	center	fwd	NA	2147.26	2174.74	0.017017	0.0552452	0.120295	0.102257	0	1807.62	1422.37	-0.344748	0.0752458	5.33593	4.98503	1.48333	-0.362916	0.0773943	-4.68918	5.56178	5.05233	5.13038
rs11231322_Ref_C	rs11231322_center_fwd_NA	rs11231322	11	63046762	C	T	ref	center	fwd	NA	2832.36	3158.49	0.150672	0.0382518	4.08706	3.79449	0.234453	4493.51	4305.02	-0.0627881	0.0360495	1.08853	0.975158	0	-0.214862	0.0494608	-4.34409	4.85433	4.38472	4.46277
rs11231323_Ref_C	rs11231323_center_fwd_NA	rs11231323	11	63046841	C	T	ref	center	fwd	NA	3695.28	9321.4	1.33649	0.0629542	99.2927	97.0425	95.4401	3162.52	7284.87	1.21053	0.042249	179.823	176.67	175.97	-0.129907	0.0649988	-1.9986	1.34055	1.13775	1.19102
rs11231347_Ref_C	rs11231347_center_fwd_NA	rs11231347	11	63087639	C	T	ref	center	fwd	NA	4299.97	4811.69	0.167247	0.0321615	6.70101	6.28976	2.84841	5039.57	5218.66	0.0505422	0.0317829	0.951627	0.849359	0	-0.118795	0.0438486	-2.70921	2.17106	1.89152	1.95495
rs11231373_Ref_A	rs11231373_center_fwd_NA	rs11231373	11	63121182	A	C	ref	center	fwd	NA	3955.83	2992.37	-0.399238	0.0450076	18.1376	17.335	14.285	2986.88	2477.69	-0.265699	0.0499324	6.98674	6.56498	3.13413	0.132569	0.0580398	2.28411	1.65043	1.41581	1.47312
rs11231374_Ref_G	rs11231374_center_fwd_NA	rs11231374	11	63121389	G	A	ref	center	fwd	NA	2593.91	2666	0.043267	0.0522075	0.390144	0.339517	0	2684.98	2876.79	0.0960912	0.0433095	1.57665	1.42757	0	0.0498387	0.0631048	0.789776	0.366876	0.293137	NA
rs11231379_Ref_C	rs11231379_center_fwd_NA	rs11231379	11	63137463	C	G	ref	center	fwd	NA	4104.45	5171.82	0.331573	0.0484648	11.1059	10.5253	7.2533	5105.94	4520.71	-0.170648	0.0328624	6.68369	6.27339	2.83109	-0.504307	0.0546509	-9.22779	19.5586	18.41	18.488
rs112323556_Ref_G	rs112323556_center_fwd_NA	rs112323556	2	29760046	G	A	ref	center	fwd	NA	4399.25	4820.22	0.13141	0.0427194	2.67836	2.46095	0	5461.35	5830.14	0.0912984	0.0336347	2.17787	1.98869	0	-0.0415037	0.0500657	-0.828984	0.390285	0.313176	0.338331
rs112329502_Ref_G	rs112329502_center_fwd_NA	rs112329502	3	114180436	G	A	ref	center	fwd	NA	601.441	525.393	-0.185163	0.0906659	1.38588	1.25057	0	323.407	307.144	-0.0695015	0.120799	0.247908	0.213601	0	0.115428	0.143383	0.805031	0.375923	0.300502	NA
rs112381273_Ref_A	rs112381273_center_fwd_NA	rs112381273	6	44156239	A	G	ref	center	fwd	NA	4367.11	4030.09	-0.116389	0.0423357	2.22373	2.03179	0	4789.27	4951.57	0.046825	0.0314123	0.866299	0.770965	0	0.161859	0.0472527	3.42538	3.21188	2.85015	2.9242
rs11239119_Ref_G	rs11239119_center_fwd_NA	rs11239119	10	44538477	G	A	ref	center	fwd	NA	2360.6	2586.25	0.134077	0.0453644	2.5057	2.29726	0	2451.34	2424.09	-0.0082607	0.0447154	0.0688304	0.0577349	0	-0.143784	0.0606204	-2.37187	1.75207	1.50761	1.56675
rs11240298_Ref_G	rs11240298_center_fwd_NA	rs11240298	1	204878366	G	A	ref	center	fwd	NA	2722.65	2941.65	0.111462	0.0393785	2.3328	2.13479	0	2948.84	2654.47	-0.151177	0.0444286	3.17571	2.9312	0	-0.264348	0.055971	-4.72295	5.63367	5.11952	5.19757
rs11240299_Ref_G	rs11240299_center_fwd_NA	rs11240299	1	204878691	G	A	ref	center	fwd	NA	5700.95	4815.59	-0.244831	0.0438004	7.6431	7.19476	3.7905	4451.02	3728.51	-0.257993	0.037213	11.3847	10.7942	7.53207	-0.0142738	0.0505151	-0.282564	0.109294	0.0826892	0.0923959
rs11240300_Ref_A	rs11240300_center_fwd_NA	rs11240300	1	204879190	A	G	ref	center	fwd	NA	1470.11	1971.52	0.426366	0.0526563	15.2498	14.5271	11.3972	1836.29	2180.87	0.248935	0.0697281	3.44748	3.18809	0	-0.178517	0.0810015	-2.20387	1.56014	1.33593	1.39263
rs11240305_Ref_C	rs11240305_center_fwd_NA	rs11240305	1	204886911	C	T	ref	center	fwd	NA	2508.42	2091.39	-0.265572	0.0568555	5.52324	5.1639	1.67064	3242.67	2573.41	-0.329297	0.0421136	14.2746	13.5828	10.422	-0.0644163	0.0642105	-1.0032	0.50064	0.40667	0.43576
rs11242521_Ref_A	rs11242521_center_fwd_NA	rs11242521	5	104568834	A	C	ref	center	fwd	NA	3550.42	4967.49	0.477663	0.0345286	42.7979	41.4616	38.9453	3782.37	3702.26	-0.0243702	0.0363341	0.298955	0.257833	0	-0.504359	0.0513136	-9.82895	22.0732	20.7906	20.8687
rs11242522_Ref_T	rs11242522_center_fwd_NA	rs11242522	5	104569213	T	C	ref	center	fwd	NA	3319.43	4967.78	0.580094	0.0427973	41.1274	39.8272	37.2748	4007.07	5349.71	0.422642	0.0325646	37.7908	36.5566	33.9382	-0.159453	0.0501784	-3.17772	2.82846	2.49306	2.56459
rs112436252_Ref_TA	rs112436252_center_fwd_NA	rs112436252	6	31396540	TA	T	ref	center	fwd	NA	3899.69	5239.56	0.423639	0.0517902	15.5466	14.8145	11.694	3283.44	4165.04	0.340728	0.0352592	21.3657	20.4727	17.5131	-0.0829086	0.0584942	-1.41738	0.805842	0.668561	0.709684
rs11244263_Ref_C	rs11244263_center_fwd_NA	rs11244263	9	131055736	C	T	ref	center	fwd	NA	4113.21	4924.02	0.252158	0.0334191	13.3457	12.6865	9.49312	4072.99	5596.83	0.455836	0.0333266	41.8611	40.5479	38.0085	0.201822	0.0467618	4.31595	4.79883	4.33519	4.41324
rs112475869_Ref_T	rs112475869_center_fwd_NA	rs112475869	4	4635851	T	G	ref	center	fwd	NA	603.547	917.871	0.611694	0.0704426	17.4162	16.6314	13.5636	1878.25	2174.87	0.213598	0.0477705	5.10939	4.76937	1.25679	-0.400694	0.0838762	-4.77721	5.7502	5.22889	5.30694
rs112490959_Ref_A	rs112490959_center_fwd_NA	rs112490959	X	80900562	A	G	ref	center	fwd	NA	3117.73	2739.93	-0.186825	0.038582	5.89158	5.51537	2.03897	4695.8	4200.99	-0.158826	0.036036	4.98047	4.64563	1.12787	0.026569	0.0485646	0.547086	0.23335	0.182492	0.199685
rs11250642_Ref_T	rs11250642_center_fwd_NA	rs11250642	10	1580449	T	C	ref	center	fwd	NA	3842.77	4024.51	0.0656357	0.0332798	1.31352	1.18359	0	4066.13	4199.91	0.0532009	0.032885	0.975888	0.871879	0	-0.0139704	0.0455062	-0.307001	0.119848	0.0910635	NA
rs112564482_Ref_G	rs112564482_center_fwd_NA	rs112564482	4	56944655	G	C	ref	center	fwd	NA	4371.14	5796.68	0.407413	0.16344	1.89701	1.72578	0	4406.86	8171.05	0.890828	0.225094	4.12085	3.8269	0.268244	0.482151	0.194259	2.482	1.8839	1.6254	1.68628
rs112565596_Ref_G	rs112565596_center_fwd_NA	rs112565596	7	119950535	G	A	ref	center	fwd	NA	5095.13	4695.75	-0.119138	0.0343654	3.27843	3.0282	0	4460.36	4714.23	0.0800788	0.0336806	1.7588	1.5969	0	0.197738	0.0435807	4.53729	5.24426	4.75078	4.82883
rs112592594_Ref_C	rs112592594_center_fwd_NA	rs112592594	18	2708485	C	T	ref	center	fwd	NA	3029.49	3218.04	0.0893008	0.0502991	1.12014	1.00442	0	3390.26	4033.94	0.252966	0.0402631	9.47824	8.95662	5.62564	0.160934	0.0559738	2.87517	2.39383	2.09562	2.16194
rs11266573_Ref_C	rs11266573_center_fwd_NA	rs11266573	X	80362438	C	T	ref	center	fwd	NA	3612.57	3285.67	-0.139189	0.0519389	2.13282	1.94636	0	3494.06	3489.78	-0.0003458	0.0387856	0.00310036	0.00255074	0	0.138525	0.0562147	2.46421	1.86228	1.60521	NA
rs112778059_Ref_C	rs112778059_center_fwd_NA	rs112778059	12	121218242	C	T	ref	center	fwd	NA	3994.96	11236.4	1.49196	0.208834	12.0434	11.4296	8.19082	5047.6	9372.82	0.892767	0.158725	7.73062	7.27944	3.87802	-0.600469	0.183131	-3.27891	2.98209	2.63601	2.70843
rs112784618_Ref_C	rs112784618_center_fwd_NA	rs112784618	6	158319417	C	CTTTCTTAG	ref	center	fwd	NA	3315.72	4370.62	0.396883	0.0463972	16.9249	16.1502	13.0723	3235.11	3976.04	0.294443	0.0397466	12.8921	12.2503	9.03949	-0.103781	0.0551375	-1.88222	1.22325	1.03311	1.08441
rs112787998_Ref_G	rs112787998_center_fwd_NA	rs112787998	X	81125161	G	A	ref	center	fwd	NA	1510.1	1520.18	0.0132374	0.0550878	0.0914613	0.0771924	0	1454.75	1977.54	0.440227	0.0489796	18.5989	17.7817	14.7463	0.424723	0.0722484	5.87865	8.3834	7.72281	7.80086
rs112819962_Ref_C	rs112819962_center_fwd_NA	rs112819962	X	80894656	C	T	ref	center	fwd	NA	5442.84	4167.49	-0.385321	0.0388004	22.5148	21.5975	18.6622	5028.04	5967.06	0.245132	0.0364922	10.7327	10.1665	6.88013	0.62836	0.0467143	13.4511	40.5182	38.4923	38.5703
rs11282895_Ref_A	rs11282895_center_fwd_NA	rs11282895	6	158314422	A	AAGATGC	ref	center	fwd	NA	6214.8	5395.4	-0.203251	0.032961	9.15575	8.6483	5.30315	4010.61	3676.33	-0.125879	0.0471225	2.12174	1.93612	0	0.0752909	0.0491791	1.53096	0.900387	0.749735	0.793523
rs112856277_Ref_C	rs112856277_center_fwd_NA	rs112856277	12	121231966	C	T	ref	center	fwd	NA	2902.17	2699.04	-0.101832	0.0457267	1.58588	1.43603	0	3658.8	3844.6	0.0683084	0.0359908	1.2388	1.11459	0	0.168013	0.0560562	2.99722	2.56471	2.25188	NA
rs112915369_Ref_T	rs112915369_center_fwd_NA	rs112915369	3	114182758	T	C	ref	center	fwd	NA	3390.14	3719.12	0.129611	0.0350119	3.66962	3.39786	0	3204.35	3778.45	0.240446	0.0461006	6.73719	6.32452	2.88458	0.108648	0.058033	1.87217	1.21337	1.02434	1.07531
rs112950020_Ref_C	rs112950020_center_fwd_NA	rs112950020	2	29762469	C	T	ref	center	fwd	NA	4689.34	4937.08	0.0744814	0.0378718	1.30785	1.17829	0	3568.83	3447.39	-0.0504837	0.0366018	0.775176	0.687228	0	-0.126964	0.0473971	-2.67874	2.13135	1.85563	NA
rs113036388_Ref_T	rs113036388_center_fwd_NA	rs113036388	5	51872183	T	C	ref	center	fwd	NA	3918.07	4098.98	0.068153	0.033766	1.36101	1.22777	0	2868.22	3829.37	0.420824	0.0468287	18.5929	17.776	14.7403	0.352971	0.0532165	6.63273	10.4821	9.71606	9.79411
rs11308053_Ref_GA	rs11308053_center_fwd_NA	rs11308053	5	43000300	GA	G	ref	center	fwd	NA	5520.83	6326.55	0.195919	0.0309708	9.59913	9.07312	5.74653	4704.94	5846.5	0.309283	0.0383985	15.0982	14.3801	11.2456	0.110363	0.0466878	2.36386	1.74267	1.49904	1.55792
rs113103441_Ref_C	rs113103441_center_fwd_NA	rs113103441	6	11940766	C	T	ref	center	fwd	NA	4854.02	4728	-0.0380431	0.0320302	0.62904	0.553578	0	5389.69	5067.17	-0.0875493	0.0390544	1.60242	1.45158	0	-0.0508378	0.0470625	-1.08022	0.552773	0.450918	NA
rs11312070_Ref_AC	rs11312070_center_fwd_NA	rs11312070	5	104575856	AC	A	ref	center	fwd	NA	3581.94	2982.9	-0.259333	0.0408065	9.68158	9.15311	5.82898	3356.25	2727.44	-0.300809	0.0473537	9.67367	9.14531	5.82107	-0.0442357	0.0561675	-0.787566	0.365573	0.29202	0.316581
rs113198975_Ref_G	rs113198975_center_fwd_NA	rs113198975	X	80387755	G	A	ref	center	fwd	NA	4609.26	4091.41	-0.170248	0.0402489	4.63112	4.31463	0.778522	4328.82	3564.51	-0.283865	0.0448049	9.62628	9.09956	5.77368	-0.11667	0.0549039	-2.12498	1.47381	1.25692	1.31235
rs11319898_Ref_AG	rs11319898_center_fwd_NA	rs11319898	4	167911151	AG	A	ref	center	fwd	NA	3709	3124.49	-0.247644	0.0384618	9.91897	9.38061	6.06637	3426.01	2495.25	-0.454675	0.0453927	22.8893	21.9641	19.0367	-0.207765	0.0536299	-3.87405	3.97045	3.55197	3.62919
rs113251439_Ref_G	rs113251439_center_fwd_NA	rs113251439	11	63132115	G	A	ref	center	fwd	NA	3419.12	3060.29	-0.163703	0.0425643	3.92061	3.63511	0.0680113	2784.67	2198.66	-0.33917	0.05004	10.9141	10.3409	7.06146	-0.176175	0.0576685	-3.05496	2.64765	2.32863	2.3984
rs113257011_Ref_C	rs113257011_center_fwd_NA	rs113257011	15	68721445	C	T	ref	center	fwd	NA	8002.43	39870.8	2.31682	0.234078	22.3705	21.4545	18.5179	8015.81	30897.8	1.94658	0.197846	22.116	21.205	18.2634	-0.37135	0.220084	-1.68732	1.03838	0.869077	0.916566
rs113275896_Ref_T	rs113275896_center_fwd_NA	rs113275896	10	53313230	T	C	ref	center	fwd	NA	4630.69	5973.85	0.363382	0.035869	23.3944	22.4555	19.5418	3783.11	3684.01	-0.0365222	0.0395521	0.448793	0.39115	0	-0.400919	0.0490691	-8.17051	15.5127	14.4951	14.5731
rs11331226_Ref_GA	rs11331226_center_fwd_NA	rs11331226	2	217722632	GA	G	ref	center	fwd	NA	1082.18	1098.8	0.0128067	0.0667406	0.071691	0.0601256	0	630.395	640.129	0.0296094	0.0795224	0.148962	0.126834	0	0.0156612	0.100307	0.156133	0.0575315	0.0444982	NA
rs11331723_Ref_CA	rs11331723_center_fwd_NA	rs11331723	14	88046139	CA	C	ref	center	fwd	NA	617.213	492.762	-0.330248	0.108227	2.64256	2.42736	0	673.386	620.671	-0.110441	0.0793215	0.785616	0.696771	0	0.219706	0.122528	1.79311	1.13694	0.955146	1.00555
rs113334470_Ref_G	rs113334470_center_fwd_NA	rs113334470	18	3572965	G	A	ref	center	fwd	NA	3401.01	4318.72	0.349446	0.033722	24.4354	23.4713	20.5828	2807.55	3284.2	0.225667	0.0479853	5.59079	5.22767	1.73819	-0.124705	0.0562861	-2.21555	1.57313	1.34786	1.40451
rs113372641_Ref_T	rs113372641_center_fwd_NA	rs113372641	X	80768822	T	C	ref	center	fwd	NA	4851.56	4217.16	-0.203166	0.035182	8.11303	7.64586	4.26043	3265.06	2823.05	-0.210799	0.038255	7.44603	7.00516	3.59343	-0.0095989	0.0469568	-0.20442	0.0767428	0.0589157	0.066066
rs11338488_Ref_GC	rs11338488_center_fwd_NA	rs11338488	8	57387616	GC	G	ref	center	fwd	NA	2192.32	2352.79	0.0991414	0.0573631	1.07607	0.963765	0	3281.95	4616.98	0.491024	0.0367549	39.9813	38.7014	36.1287	0.391911	0.0591006	6.63124	10.4777	9.71258	9.79063
rs113450449_Ref_TA	rs113450449_center_fwd_NA	rs113450449	4	167922805	TA	T	ref	center	fwd	NA	396.816	346.726	-0.195401	0.12691	0.907851	0.808815	0	286.183	426.997	0.57213	0.122553	5.51779	5.15881	1.66519	0.765776	0.167483	4.57226	5.3165	4.81909	4.89714
rs113548876_Ref_G	rs113548876_center_fwd_NA	rs113548876	15	68691058	G	A	ref	center	fwd	NA	3235.66	20921.9	2.69273	0.178384	50.7585	49.2613	46.9059	2967.25	16921.6	2.51172	0.153095	59.7634	58.107	55.9107	-0.182109	0.236521	-0.76995	0.355237	0.284841	0.308558
rs113573208_Ref_A	rs113573208_center_fwd_NA	rs113573208	10	8528729	A	C	ref	center	fwd	NA	6252.63	18639.8	1.576	0.17139	19.4276	18.5869	15.575	3706.5	7423.46	1.00202	0.205299	5.97601	5.59609	2.12341	-0.575016	0.230619	-2.49336	1.89777	1.6387	1.69956
rs113633408_Ref_A	rs113633408_center_fwd_NA	rs113633408	11	63115636	A	G	ref	center	fwd	NA	3947.12	4634.62	0.236941	0.0326958	12.37	11.7452	8.51738	5363.39	6901.96	0.365261	0.0478551	13.6383	12.9688	9.7857	0.1288	0.0536564	2.40045	1.78583	1.53804	1.59761
rs113700142_Ref_A	rs113700142_center_fwd_NA	rs113700142	2	131085297	A	G	ref	center	fwd	NA	2908.72	4847.6	0.747315	0.0331945	111.511	109.114	107.659	3613.24	3577.01	-0.0110591	0.0444227	0.0950695	0.0801992	0	-0.756391	0.0577785	-13.0912	38.4322	36.4827	36.5607
rs113712987_Ref_G	rs113712987_center_fwd_NA	rs113712987	5	51874007	G	A	ref	center	fwd	NA	5039.24	5295.27	0.0698995	0.0356858	1.2998	1.17101	0	3999.36	4446.49	0.15512	0.0401395	3.9535	3.66676	0.100897	0.0841604	0.0480095	1.753	1.09907	0.924161	0.973255
rs11371766_Ref_A	rs11371766_center_fwd_NA	rs11371766	6	22687706	A	AG	ref	center	fwd	NA	3417.11	4573.8	0.419571	0.0459748	19.1487	18.3169	15.2961	3307.08	3369.96	0.0268302	0.0368192	0.331442	0.286775	0	-0.394208	0.0536037	-7.35412	12.7163	11.8207	11.8987
rs11374281_Ref_T	rs11374281_center_fwd_NA	rs11374281	12	86184637	T	TC	ref	center	fwd	NA	4371.61	6377.03	0.546421	0.0462697	31.4576	30.3461	27.605	3857.72	4621.57	0.265319	0.0324378	15.5445	14.8125	11.6919	-0.284759	0.0524215	-5.4321	7.25419	6.6515	6.72955
rs113774983_Ref_T	rs113774983_center_fwd_NA	rs113774983	3	159160470	T	A	ref	center	fwd	NA	1993.7	2191.81	0.130597	0.0495127	2.0784	1.89506	0	1797.98	1912.52	0.0954686	0.0604051	0.9431	0.84145	0	-0.0356062	0.0735805	-0.483907	0.201728	0.156083	NA
rs113803454_Ref_TC	rs113803454_center_fwd_NA	rs113803454	5	56716456	TC	T	ref	center	fwd	NA	2185.59	2057.1	-0.0865064	0.0451961	1.25479	1.12953	0	1108.68	896.005	-0.303985	0.0765246	4.14778	3.85208	0.295175	-0.216602	0.0758216	-2.85674	2.36853	2.0722	2.13826
rs113867623_Ref_C	rs113867623_center_fwd_NA	rs113867623	2	131094030	C	T	ref	center	fwd	NA	4554.89	5649.39	0.308825	0.0314957	21.9714	21.0627	18.1188	3730.97	3955.21	0.0827767	0.0352944	1.721	1.56122	0	-0.228114	0.043985	-5.18617	6.66825	6.09126	6.16931
rs113920486_Ref_C	rs113920486_center_fwd_NA	rs113920486	10	52539853	C	G	ref	center	fwd	NA	3702.51	3409.06	-0.10932	0.0379402	2.40237	2.20049	0	3251.45	3462.96	0.0954109	0.0406919	1.7203	1.56067	0	0.203943	0.0568585	3.58685	3.47535	3.094	3.1694
rs113978639_Ref_G	rs113978639_center_fwd_NA	rs113978639	5	42865197	G	A	ref	center	fwd	NA	964.028	762.162	-0.352215	0.0739752	5.71581	5.34701	1.8632	576.012	462.79	-0.30525	0.0932641	2.97296	2.73971	0	0.0455181	0.115653	0.393577	0.158707	0.120918	0.133906
rs113987455_Ref_C	rs113987455_center_fwd_NA	rs113987455	6	85587105	C	T	ref	center	fwd	NA	4792.08	4382.16	-0.130745	0.0359859	3.55301	3.28748	0	4926.4	6266.02	0.34471	0.0317935	26.6628	25.6472	22.8102	0.473849	0.0437325	10.8352	26.6298	25.2101	25.2881
rs113991468_Ref_G	rs113991468_center_fwd_NA	rs113991468	4	77917843	G	A	ref	center	fwd	NA	3300.43	5055.48	0.61405	0.108882	7.76835	7.31544	3.91574	5008.21	7131.94	0.510632	0.0392859	37.9003	36.663	34.0477	-0.102992	0.0876468	-1.17508	0.619858	0.510579	0.545248
rs11403103_Ref_C	rs11403103_center_fwd_NA	rs11403103	4	118357206	C	CT	ref	center	fwd	NA	3545.13	5142.93	0.53885	0.0378326	45.3049	43.9136	41.4523	3325.37	3305.21	-0.0122456	0.0395663	0.120936	0.102739	0	-0.553811	0.0506201	-10.9405	27.1321	25.6868	25.7649
rs11408788_Ref_G	rs11408788_center_fwd_NA	rs11408788	2	4850313	G	GC	ref	center	fwd	NA	4310.98	3322.93	-0.375039	0.0513373	12.5584	11.9268	8.70576	4306.84	3929.25	-0.132472	0.0354182	3.73551	3.46042	0	0.240435	0.0521717	4.60853	5.39197	4.89008	4.96813
rs11412128_Ref_T	rs11412128_center_fwd_NA	rs11412128	6	158328773	T	TG	ref	center	fwd	NA	5223.58	4797.07	-0.120303	0.0364183	3.01987	2.78426	0	5502.38	5140.82	-0.0974771	0.0331896	2.47961	2.27274	0	0.0203463	0.0447104	0.45507	0.187716	0.145788	0.15931
rs11424253_Ref_A	rs11424253_center_fwd_NA	rs11424253	4	77984965	A	AT	ref	center	fwd	NA	3225.49	5092.74	0.659379	0.0352064	77.5415	75.6004	73.6889	3554.42	4590.95	0.372143	0.0357114	24.7007	23.7305	20.8481	-0.288853	0.0476813	-6.05799	8.86064	8.17865	8.2567
rs11430358_Ref_C	rs11430358_center_fwd_NA	rs11430358	11	63121527	C	CA	ref	center	fwd	NA	5254.44	5921.79	0.169135	0.0318249	6.97096	6.54985	3.11836	4270.6	4032.99	-0.0764693	0.0346697	1.56212	1.41412	0	-0.24715	0.0465126	-5.31362	6.96873	6.37601	6.45406
rs114359618_Ref_C	rs114359618_center_fwd_NA	rs114359618	6	158232783	C	T	ref	center	fwd	NA	2903.16	3229.83	0.152581	0.0581926	2.05841	1.8767	0	3366.35	3117.24	-0.105743	0.0375378	2.31446	2.1178	0	-0.260332	0.0611145	-4.25974	4.68896	4.23258	4.31063
rs114598563_Ref_A	rs114598563_center_fwd_NA	rs114598563	5	42870701	A	G	ref	center	fwd	NA	6353.56	8273.78	0.38125	0.037947	23.0232	22.0934	19.1706	6892.99	8734.93	0.339514	0.0362857	20.0848	19.2269	16.2322	-0.0435876	0.0498656	-0.874101	0.417865	0.336981	0.363143
rs11462221_Ref_A	rs11462221_center_fwd_NA	rs11462221	15	68709888	A	AC	ref	center	fwd	NA	5186.37	5795.34	0.159317	0.0443896	3.47902	3.21762	0	3944.38	3368.22	-0.229622	0.055879	4.40132	4.09544	0.548715	-0.391673	0.0597549	-6.55466	10.2536	9.502	9.58005
rs1147610_Ref_G	rs1147610_center_fwd_NA	rs1147610	10	104181409	G	T	ref	center	fwd	NA	2197.01	1993.3	-0.140761	0.066603	1.46138	1.32095	0	2513.11	2218.82	-0.174024	0.051682	3.11957	2.87789	0	-0.034415	0.0729574	-0.471714	0.195771	0.151759	0.166359
rs11478629_Ref_CT	rs11478629_center_fwd_NA	rs11478629	20	34977050	CT	C	ref	center	fwd	NA	363.214	332.579	-0.107986	0.109592	0.488849	0.426889	0	286.881	283.389	-0.0104509	0.135246	0.0276092	0.0231001	0	0.0997	0.176694	0.564252	0.242162	0.189176	NA
rs11494052_Ref_A	rs11494052_center_fwd_NA	rs11494052	11	63112169	A	T	ref	center	fwd	NA	4616.1	5437.02	0.23634	0.033706	11.6284	11.0312	7.77583	4332.06	4983.87	0.200514	0.0337376	8.55396	8.07066	4.70136	-0.0379219	0.0446184	-0.849917	0.402995	0.323247	0.348913
rs11494054_Ref_T	rs11494054_center_fwd_NA	rs11494054	11	63127476	T	A	ref	center	fwd	NA	5164	4682.77	-0.138752	0.0328268	4.62513	4.30895	0.772532	6191.58	6050.06	-0.0363376	0.0333083	0.560198	0.491008	0	0.100452	0.0458171	2.19246	1.5475	1.32434	1.38082
rs11494202_Ref_A	rs11494202_center_fwd_NA	rs11494202	11	63110883	A	G	ref	center	fwd	NA	2943.98	3684.68	0.324605	0.0452202	12.1513	11.5331	8.29871	2734.34	2174.66	-0.330113	0.0469393	11.6936	11.0934	7.84102	-0.656663	0.0598724	-10.9677	27.2625	25.8084	25.8864
rs114998182_Ref_G	rs114998182_center_fwd_NA	rs114998182	5	42908644	G	C	ref	center	fwd	NA	5247.43	5431.8	0.0539473	0.0342699	0.937629	0.836403	0	5234.3	5294.49	0.0160891	0.0357618	0.18523	0.158355	0	-0.0401714	0.0457711	-0.877661	0.42007	0.338997	NA
rs115079949_Ref_A	rs115079949_center_fwd_NA	rs115079949	2	29743946	A	T	ref	center	fwd	NA	3356.64	3334.18	-0.0092329	0.0378674	0.0929285	0.0784388	0	3818.18	3528.33	-0.115936	0.0396698	2.4594	2.25396	0	-0.108976	0.0514439	-2.11834	1.46666	1.2508	1.30629
rs115122924_Ref_G	rs115122924_center_fwd_NA	rs115122924	5	42909077	G	A	ref	center	fwd	NA	4511.52	9956.19	1.14245	0.0756539	50.7976	49.2985	46.945	5684.97	10678	0.908205	0.0583413	53.9145	52.3556	50.0618	-0.236439	0.0782962	-3.01981	2.59699	2.28059	2.35007
rs11512861_Ref_G	rs11512861_center_fwd_NA	rs11512861	11	63054449	G	C	ref	center	fwd	NA	2200.87	2082.3	-0.0807481	0.0535077	0.881817	0.785151	0	2258.53	2241.22	-0.0053896	0.0501296	0.0388722	0.0323852	0	0.0745405	0.0664938	1.12101	0.581232	0.476182	NA
rs115139547_Ref_T	rs115139547_center_fwd_NA	rs115139547	6	76809647	T	G	ref	center	fwd	NA	1975.61	2598.28	0.395129	0.0414734	20.792	19.9172	16.9394	958.164	939.721	-0.0222504	0.0681681	0.128358	0.109174	0	-0.416979	0.0759416	-5.49078	7.39777	6.78873	6.86678
rs115267736_Ref_A	rs115267736_center_fwd_NA	rs115267736	4	56900757	A	G	ref	center	fwd	NA	5517.55	92085.6	4.06085	0.315481	37.1886	35.9654	33.336	3737.4	53697	3.84472	0.289038	39.6458	38.3734	35.7932	-0.217148	0.303324	-0.715894	0.32417	0.259019	0.281161
rs115282751_Ref_A	rs115282751_center_fwd_NA	rs115282751	1	150613840	A	G	ref	center	fwd	NA	3827.96	3767.45	-0.0209173	0.0398337	0.222209	0.190733	0	4160.59	4629.12	0.150156	0.0387488	3.97233	3.68476	0.119729	0.168331	0.0513157	3.28031	2.98425	2.63781	2.71023
rs115332630_Ref_C	rs115332630_center_fwd_NA	rs115332630	5	128397970	C	T	ref	center	fwd	NA	3176.29	2541.09	-0.317616	0.0528887	8.7192	8.22717	4.86659	4377.35	4621.3	0.075981	0.0318532	1.76795	1.60546	0	0.389134	0.05323	7.31044	12.5747	11.6852	11.7633
rs1154140_Ref_G	rs1154140_center_fwd_NA	rs1154140	14	40917801	G	A	ref	center	fwd	NA	3460.21	3484.44	0.0178081	0.036906	0.201051	0.17242	0	4477.48	4523.89	0.0141107	0.0332856	0.172878	0.147688	0	-0.0060197	0.0491584	-0.122456	0.0445344	0.0353107	NA
rs115416278_Ref_G	rs115416278_center_fwd_NA	rs115416278	6	11933097	G	A	ref	center	fwd	NA	1612.68	4678.48	1.52865	0.0539748	175.728	172.689	171.875	2037.92	5417.77	1.40614	0.0597553	121.712	119.222	117.86	-0.12617	0.104513	-1.20722	0.64331	0.52976	0.565558
rs11573113_Ref_G	rs11573113_center_fwd_NA	rs11573113	4	57040228	G	A	ref	center	fwd	NA	4062.75	3321.97	-0.291275	0.0402075	12.3618	11.7375	8.5092	4209.49	3673.92	-0.196068	0.0402917	5.94399	5.56553	2.09139	0.0937589	0.0506399	1.85148	1.19314	1.0063	1.05714
rs115761617_Ref_A	rs115761617_center_fwd_NA	rs115761617	20	7541396	A	G	ref	center	fwd	NA	3398.58	2677.06	-0.346617	0.041832	15.9311	15.1845	12.0785	4207.82	3786.5	-0.153914	0.0386147	4.17246	3.87568	0.31986	0.191152	0.0512431	3.7303	3.71839	3.32123	3.39771
rs11576175_Ref_G	rs11576175_center_fwd_NA	rs11576175	1	150754918	G	A	ref	center	fwd	NA	4160.04	4373.08	0.0720563	0.0403084	1.13173	1.01521	0	3688.74	3993.88	0.113604	0.0510401	1.58454	1.43474	0	0.0393584	0.056203	0.70029	0.315382	0.251415	NA
rs115770773_Ref_T	rs115770773_center_fwd_NA	rs115770773	3	49772319	T	C	ref	center	fwd	NA	221.681	235.076	0.108495	0.15599	0.312715	0.270042	0	296.874	322.402	0.114415	0.140665	0.38091	0.331209	0	0.00270705	0.208656	0.0129738	0.00451894	0.00373146	NA
rs11581563_Ref_T	rs11581563_center_fwd_NA	rs11581563	1	118394879	T	C	ref	center	fwd	NA	2706.65	2272.17	-0.25315	0.0481172	6.84411	6.42772	2.99151	3784.51	3467.76	-0.128321	0.035315	3.55365	3.28789	0	0.123452	0.0528636	2.3353	1.70935	1.46901	1.5269
rs11582487_Ref_G	rs11582487_center_fwd_NA	rs11582487	1	118394777	G	A	ref	center	fwd	NA	4293.08	4469.12	0.0538634	0.0337402	0.957047	0.854509	0	5202.25	5248.08	0.0155311	0.0425093	0.145789	0.124013	0	-0.0396349	0.0512695	-0.77307	0.35706	0.286108	NA
rs11591669_Ref_A	rs11591669_center_fwd_NA	rs11591669	10	44515667	A	C	ref	center	fwd	NA	6485.58	8740.52	0.429272	0.0488739	17.7991	17.0059	13.9465	4392.09	4925.61	0.165818	0.0429011	3.95456	3.66769	0.101953	-0.264485	0.0553556	-4.77792	5.75174	5.22991	5.30795
rs11592436_Ref_C	rs11592436_center_fwd_NA	rs11592436	10	8533620	C	G	ref	center	fwd	NA	4431.32	5613.17	0.339	0.0362601	20.0537	19.1969	16.2011	4398.26	5159.81	0.231308	0.0432604	7.04826	6.62335	3.19566	-0.109159	0.0507936	-2.14907	1.49992	1.28042	1.33599
rs11593423_Ref_C	rs11593423_center_fwd_NA	rs11593423	10	44533106	C	T	ref	center	fwd	NA	3642.13	4382.17	0.266381	0.0355949	13.1411	12.4891	9.28848	3544.8	4059.72	0.198479	0.0524106	3.81679	3.53708	0	-0.0679337	0.0559091	-1.21507	0.649098	0.534862	0.570597
rs11593437_Ref_A	rs11593437_center_fwd_NA	rs11593437	10	44518446	A	T	ref	center	fwd	NA	2968.92	2259.83	-0.393256	0.0504035	14.2157	13.5269	10.3631	3932.34	3992.41	0.0175263	0.0364429	0.200267	0.171766	0	0.408933	0.0545542	7.49591	13.1815	12.2644	12.3424
rs11593585_Ref_G	rs11593585_center_fwd_NA	rs11593585	10	44575745	G	T	ref	center	fwd	NA	4398.48	3540.49	-0.313068	0.0449001	11.5069	10.9134	7.6543	5208.77	4596.08	-0.184904	0.0329185	7.71157	7.26116	3.85896	0.127068	0.0522052	2.43401	1.82586	1.57332	1.63356
rs11595047_Ref_T	rs11595047_center_fwd_NA	rs11595047	10	8533160	T	C	ref	center	fwd	NA	2197.5	1790.23	-0.293581	0.057667	6.44828	6.04814	2.59568	1950.24	1504.24	-0.373817	0.057791	10.0042	9.46376	6.15164	-0.0826424	0.0716338	-1.15368	0.604443	0.49678	0.530727
rs11595335_Ref_T	rs11595335_center_fwd_NA	rs11595335	10	44591640	T	G	ref	center	fwd	NA	4342.23	4535.33	0.060272	0.0398609	0.884324	0.787314	0	4877.05	4414.97	-0.144078	0.034036	4.63738	4.32063	0.78478	-0.20532	0.0472797	-4.34267	4.85152	4.3842	4.46225
rs11595799_Ref_T	rs11595799_center_fwd_NA	rs11595799	10	44632864	T	C	ref	center	fwd	NA	4445.14	7235.25	0.702959	0.168811	4.5052	4.19435	0.652594	4539.43	9047.61	0.994963	0.0699605	45.1731	43.7869	41.3205	0.290605	0.137563	2.11252	1.46039	1.24583	1.30111
rs11596712_Ref_A	rs11596712_center_fwd_NA	rs11596712	10	8517293	A	C	ref	center	fwd	NA	1567.84	2245.95	0.524667	0.055037	20.8158	19.9406	16.9632	2138.69	2250.17	0.0796992	0.0518477	0.905706	0.806938	0	-0.447218	0.0755226	-5.92165	8.49659	7.83165	7.9097
rs11596994_Ref_G	rs11596994_center_fwd_NA	rs11596994	10	8539146	G	A	ref	center	fwd	NA	2941.96	3466.23	0.230174	0.0390265	8.43396	7.95547	4.58136	3307.67	2584.18	-0.352289	0.0468865	13.2404	12.5854	9.38775	-0.583809	0.0580183	-10.0625	23.0919	21.7748	21.8529
rs11597734_Ref_G	rs11597734_center_fwd_NA	rs11597734	10	44558074	G	A	ref	center	fwd	NA	4117.17	4587.43	0.159934	0.0397556	4.24049	3.94098	0.387884	4768.67	4494.47	-0.0829363	0.0359201	1.67884	1.52257	0	-0.245326	0.0511325	-4.79785	5.79487	5.27041	5.34846
rs11597961_Ref_T	rs11597961_center_fwd_NA	rs11597961	10	44530281	T	A	ref	center	fwd	NA	2848.47	2518.82	-0.174316	0.0403897	4.79861	4.47413	0.946008	4573	3847.42	-0.248961	0.05611	5.03995	4.70233	1.18735	-0.075766	0.05987	-1.26551	0.686789	0.567589	0.604053
rs11598916_Ref_G	rs11598916_center_fwd_NA	rs11598916	10	44559314	G	A	ref	center	fwd	NA	4607.62	4118.6	-0.163193	0.0349282	5.5259	5.16635	1.6733	4518.75	4913.21	0.125771	0.031791	4.11829	3.82458	0.265688	0.287547	0.0445549	6.45377	9.96216	9.22797	9.30602
rs116190561_Ref_T	rs116190561_center_fwd_NA	rs116190561	6	76809645	T	G	ref	center	fwd	NA	2913.8	3996.64	0.461195	0.0369824	34.9669	33.7918	31.1143	1723.2	1738.72	0.0167471	0.0577118	0.112566	0.0954172	0	-0.443537	0.0623658	-7.11186	11.9412	11.0936	11.1717
rs116215337_Ref_G	rs116215337_center_fwd_NA	rs116215337	5	128667055	G	A	ref	center	fwd	NA	2580.04	2002.18	-0.368427	0.0506621	12.4515	11.8233	8.59891	2570.87	2375.5	-0.112289	0.0474369	1.74649	1.58542	0	0.255063	0.064963	3.92628	4.06414	3.64027	3.7179
rs11621703_Ref_G	rs11621703_center_fwd_NA	rs11621703	14	24586146	G	A	ref	center	fwd	NA	2556.81	2377	-0.110038	0.0425985	2.00921	1.83107	0	4109.06	3719.24	-0.139272	0.0385943	3.5117	3.24846	0	-0.0302041	0.0546277	-0.552907	0.236327	0.184555	0.202022
rs11622908_Ref_A	rs11622908_center_fwd_NA	rs11622908	14	24583298	A	C	ref	center	fwd	NA	2535.33	3196.71	0.337907	0.0424078	14.7925	14.085	10.9399	2983.79	3274.28	0.139684	0.0388242	3.4937	3.23158	0	-0.200648	0.058348	-3.43881	3.23338	2.87014	2.94454
rs11624919_Ref_T	rs11624919_center_fwd_NA	rs11624919	14	96346836	T	C	ref	center	fwd	NA	4838.63	4505.48	-0.101954	0.0482434	1.46127	1.32088	0	4115	4073.11	-0.0096386	0.0360051	0.102962	0.0871451	0	0.0894425	0.053576	1.66945	1.02215	0.855182	NA
rs11625930_Ref_T	rs11625930_center_fwd_NA	rs11625930	14	40893859	T	A	ref	center	fwd	NA	802.155	734.313	-0.117467	0.0753411	0.924588	0.824285	0	1146.52	1071.26	-0.0919432	0.0762282	0.642529	0.56583	0	0.0247438	0.104544	0.236684	0.089962	0.0686783	NA
rs11626502_Ref_T	rs11626502_center_fwd_NA	rs11626502	14	40917081	T	C	ref	center	fwd	NA	6401.33	6711.39	0.0654499	0.0348848	1.2173	1.09492	0	4678.17	4654.24	-0.0055572	0.0349514	0.0586521	0.049119	0	-0.0723208	0.0466019	-1.55189	0.918332	0.764552	NA
rs11627143_Ref_C	rs11627143_center_fwd_NA	rs11627143	14	96370587	C	G	ref	center	fwd	NA	3097.61	3037	-0.0348221	0.0387318	0.433419	0.378173	0	5994.06	6930.82	0.209106	0.0418961	6.22148	5.83044	2.36888	0.242276	0.0507635	4.77264	5.74034	5.21955	5.2976
rs11628872_Ref_G	rs11628872_center_fwd_NA	rs11628872	14	40892981	G	C	ref	center	fwd	NA	4354.29	5494.61	0.335516	0.0391842	16.957	16.1814	13.1044	3300	4206.05	0.3517	0.0360713	21.7346	20.8318	17.882	0.0143006	0.0484644	0.295074	0.114674	0.086897	0.0969924
rs11640818_Ref_C	rs11640818_center_fwd_NA	rs11640818	16	87171005	C	A	ref	center	fwd	NA	3122.8	3310.46	0.0810498	0.0398593	1.37662	1.24198	0	3509.82	3863.94	0.133286	0.0364373	3.59479	3.32695	0	0.0506701	0.0521484	0.971652	0.479878	0.388829	0.41718
rs116488178_Ref_A	rs116488178_center_fwd_NA	rs116488178	5	129839455	A	G	ref	center	fwd	NA	3166.97	2765.11	-0.192033	0.0418244	5.35631	5.00472	1.50371	3803.79	3973.25	0.0618719	0.0351787	1.1045	0.989937	0	0.251607	0.052944	4.75232	5.69661	5.17894	5.25699
rs116502036_Ref_C	rs116502036_center_fwd_NA	rs116502036	5	42873499	C	T	ref	center	fwd	NA	3474.8	3289.19	-0.0849098	0.0358755	1.7461	1.58508	0	2756.74	2437.36	-0.181273	0.0426783	4.66508	4.34687	0.812481	-0.0991114	0.054155	-1.83014	1.17245	0.987533	1.03799
rs11650428_Ref_C	rs11650428_center_fwd_NA	rs11650428	17	14212687	C	G	ref	center	fwd	NA	4118.01	4500.06	0.125358	0.0334087	3.75633	3.48007	0	3741.14	3657.27	-0.0272885	0.0356691	0.352377	0.30571	0	-0.15447	0.0492227	-3.13818	2.76954	2.44057	2.51151
rs1167418372_Ref_A	rs1167418372_center_fwd_NA	rs1167418372	5	42939665	A	T	ref	center	fwd	NA	3540.26	4098.3	0.209548	0.0335063	9.39779	8.87921	5.54519	2033.78	1848.54	-0.143333	0.047522	2.59173	2.37953	0	-0.356681	0.0535173	-6.66479	10.5767	9.80415	9.8822
rs116864428_Ref_G	rs116864428_center_fwd_NA	rs116864428	7	119789890	G	A	ref	center	fwd	NA	1530.57	1810.98	0.235663	0.0622268	3.81708	3.53731	0	1149.13	1358.71	0.251216	0.0635816	4.10901	3.81578	0.256409	0.0149743	0.0850123	0.176143	0.0654097	0.0501405	0.0558895
rs116884586_Ref_G	rs116884586_center_fwd_NA	rs116884586	5	43000781	G	A	ref	center	fwd	NA	3795.6	5510.45	0.530206	0.0363159	47.5505	46.1198	43.6979	4483.64	5718.23	0.352197	0.0328895	26.0322	25.0322	22.1796	-0.17921	0.0480733	-3.72785	3.71416	3.3178	3.39427
rs116904098_Ref_C	rs116904098_center_fwd_NA	rs116904098	7	120187992	C	A	ref	center	fwd	NA	4796.34	4975.81	0.0559954	0.0341258	0.996416	0.89023	0	4052.8	3259.54	-0.311543	0.0408321	13.6289	12.9598	9.77632	-0.368617	0.0483427	-7.6251	13.6129	12.6749	12.753
rs116930961_Ref_A	rs116930961_center_fwd_NA	rs116930961	7	119901960	A	G	ref	center	fwd	NA	846.881	769.944	-0.134507	0.0726318	1.19355	1.07286	0	826.117	767.573	-0.109823	0.0736242	0.86714	0.77173	0	0.0222818	0.0993659	0.22424	0.0848267	0.0646982	NA
rs11693177_Ref_C	rs11693177_center_fwd_NA	rs11693177	2	217712620	C	T	ref	center	fwd	NA	4758.16	4207.98	-0.178304	0.0415743	4.74559	4.42342	0.892985	4760.81	4829.23	0.0248805	0.0359902	0.310363	0.267888	0	0.202009	0.0497379	4.06147	4.31189	3.87401	3.95206
rs116951270_Ref_T	rs116951270_center_fwd_NA	rs116951270	5	43073930	T	C	ref	center	fwd	NA	4145.3	3787.35	-0.128722	0.0384993	3.08235	2.84332	0	5406.52	4331.96	-0.320874	0.0363514	17.9686	17.1708	14.116	-0.194453	0.0484856	-4.01053	4.21765	3.78407	3.86169
rs11696652_Ref_T	rs11696652_center_fwd_NA	rs11696652	20	35049257	T	G	ref	center	fwd	NA	1699.64	2203.8	0.367852	0.051255	12.1469	11.5288	8.29426	2601.38	2873.29	0.146875	0.0537664	2.20064	2.01013	0	-0.222079	0.0710203	-3.12698	2.75298	2.42635	2.49699
rs11698868_Ref_C	rs11698868_center_fwd_NA	rs11698868	20	34962143	C	T	ref	center	fwd	NA	4950.43	4750.9	-0.0633181	0.0341595	1.1952	1.07436	0	5415.16	5249.98	-0.0458482	0.0446257	0.51679	0.451909	0	0.0146384	0.052155	0.280672	0.108484	0.0820465	NA
rs117017148_Ref_A	rs117017148_center_fwd_NA	rs117017148	8	80576852	A	G	ref	center	fwd	NA	2880.97	2344.88	-0.291262	0.0498414	8.29216	7.81905	4.43956	2899.22	3004.61	0.0493936	0.0403945	0.654797	0.577261	0	0.336775	0.0587402	5.7333	8.0066	7.36503	7.44308
rs117022093_Ref_C	rs117022093_center_fwd_NA	rs117022093	5	42971032	C	T	ref	center	fwd	NA	2472.03	2641.52	0.0962486	0.0403497	1.76796	1.60546	0	2855.17	2897.32	0.022482	0.0394649	0.244963	0.211118	0	-0.0756883	0.0546717	-1.38442	0.779287	0.64566	NA
rs117023276_Ref_G	rs117023276_center_fwd_NA	rs117023276	10	20984754	G	A	ref	center	fwd	NA	3362.5	2935.21	-0.199213	0.037656	6.91333	6.49414	3.06073	2644.75	3587.83	0.437509	0.0478783	19.1962	18.3631	15.3436	0.633533	0.0570366	11.1075	27.9379	26.4561	26.5341
rs11702929_Ref_T	rs11702929_center_fwd_NA	rs11702929	22	29797609	T	C	ref	center	fwd	NA	3581.25	3873.62	0.110108	0.0430439	1.97772	1.80162	0	5215.14	5164.83	-0.0173613	0.0323985	0.227642	0.195443	0	-0.127728	0.0518554	-2.46316	1.86101	1.60422	NA
rs117042785_Ref_A	rs117042785_center_fwd_NA	rs117042785	20	14926977	A	G	ref	center	fwd	NA	2530.59	3722.67	0.557688	0.0397609	43.9666	42.6064	40.114	2994.6	2680.64	-0.157012	0.0417133	3.77684	3.49938	0	-0.7163	0.0552561	-12.9633	37.7042	35.7818	35.8598
rs1171127800_Ref_T	rs1171127800_center_fwd_NA	rs1171127800	4	4635854	T	C	ref	center	fwd	NA	1863.89	1976.19	0.0866009	0.0519551	1.01979	0.911883	0	3070.64	4050.9	0.397167	0.0449162	18.0283	17.2282	14.1757	0.307962	0.0635595	4.84525	5.89807	5.36618	5.44423
rs1171508715_Ref_AT	rs1171508715_center_fwd_NA	rs1171508715	2	130536445	AT	A	ref	center	fwd	NA	6021.73	7653.93	0.349256	0.0361861	21.3155	20.4238	17.4629	4976.81	5563.95	0.162483	0.0511265	2.82896	2.60317	0	-0.187067	0.0551541	-3.39172	3.15829	2.79908	2.8728
rs117173528_Ref_C	rs117173528_center_fwd_NA	rs117173528	20	6469027	C	T	ref	center	fwd	NA	3416.52	3771.3	0.147197	0.0396976	3.67998	3.40747	0	2380.54	2549.98	0.0936621	0.0426593	1.55096	1.4039	0	-0.0561379	0.0563727	-0.995835	0.49576	0.40218	0.431317
rs117188433_Ref_G	rs117188433_center_fwd_NA	rs117188433	16	87636635	G	A	ref	center	fwd	NA	5280.59	7419.3	0.48931	0.040739	32.5065	31.3769	28.6539	3703.81	6040.87	0.704102	0.0422078	61.75	60.0591	57.8974	0.212984	0.0516905	4.12038	4.42222	3.98044	4.05849
rs117196562_Ref_A	rs117196562_center_fwd_NA	rs117196562	5	43077788	A	G	ref	center	fwd	NA	4747.34	4162.79	-0.193075	0.0340167	7.86018	7.40353	4.00757	4149.8	2837.13	-0.549201	0.0447734	33.8618	32.7055	30.0092	-0.358326	0.0499557	-7.17287	12.1341	11.2741	11.3521
rs117210588_Ref_C	rs117210588_center_fwd_NA	rs117210588	20	14971486	C	G	ref	center	fwd	NA	3008.04	3371.03	0.164419	0.0422381	4.00371	3.71454	0.151111	4695.03	4484.21	-0.0637434	0.0331276	1.26494	1.13878	0	-0.229999	0.0483263	-4.75928	5.71156	5.19234	5.27039
rs11721536_Ref_T	rs11721536_center_fwd_NA	rs11721536	4	139867274	T	C	ref	center	fwd	NA	2348.24	2497.26	0.0969239	0.0441379	1.55135	1.40425	0	2717.43	3764.9	0.473153	0.0405242	30.771	29.6746	26.9184	0.373962	0.0593112	6.30508	9.54055	8.82474	8.90279
rs11723221_Ref_A	rs11723221_center_fwd_NA	rs11723221	4	77899619	A	G	ref	center	fwd	NA	3733.46	4031.92	0.110332	0.0353632	2.74262	2.52203	0	4429.58	5667.85	0.359108	0.0394018	19.1002	18.2699	15.2476	0.24794	0.0499959	4.95921	6.15008	5.60182	5.67987
rs117240341_Ref_C	rs117240341_center_fwd_NA	rs117240341	20	15018305	C	T	ref	center	fwd	NA	4342.88	3938.95	-0.143577	0.0391417	3.61203	3.34314	0	3189.75	3537.32	0.145071	0.0453585	2.8594	2.63202	0	0.285846	0.0545661	5.23852	6.79085	6.20847	6.28652
rs117298138_Ref_C	rs117298138_center_fwd_NA	rs117298138	6	84512260	C	T	ref	center	fwd	NA	3810.77	3858.66	0.0267378	0.0369409	0.328652	0.284187	0	4607.35	5071.07	0.133087	0.0313004	4.67378	4.35493	0.821175	0.106485	0.0532548	1.99953	1.34151	1.13839	1.19163
rs11730329_Ref_C	rs11730329_center_fwd_NA	rs11730329	4	77849791	C	T	ref	center	fwd	NA	5135.21	6228.44	0.276498	0.0386312	12.085	11.4694	8.23236	3930.6	4132.96	0.0747018	0.0401274	1.20303	1.0817	0	-0.202867	0.0506571	-4.0047	4.20694	3.77421	3.85183
rs117312134_Ref_C	rs117312134_center_fwd_NA	rs117312134	5	43072371	C	T	ref	center	fwd	NA	3542.1	4502.37	0.34805	0.0359002	21.4992	20.6021	17.6466	3359.08	4497.73	0.43337	0.0359853	32.6754	31.5433	28.8228	0.082908	0.0526137	1.57579	0.93902	0.781825	0.827555
rs117319560_Ref_G	rs117319560_center_fwd_NA	rs117319560	16	87244175	G	C	ref	center	fwd	NA	4492.62	7226.25	0.68648	0.0398551	65.7588	64.0052	61.9062	5654.82	7417.29	0.388403	0.0343895	28.8536	27.7969	25.001	-0.300152	0.0488026	-6.15034	9.11171	8.41666	8.49471
rs11732039_Ref_C	rs11732039_center_fwd_NA	rs11732039	4	77927031	C	T	ref	center	fwd	NA	2200.36	1966.81	-0.159167	0.0468646	3.16559	2.92145	0	2663.09	2829.89	0.0869453	0.0394335	1.56123	1.41332	0	0.243941	0.0609323	4.00348	4.20469	3.77281	3.85043
rs11733759_Ref_C	rs11733759_center_fwd_NA	rs11733759	4	77852552	C	T	ref	center	fwd	NA	3292.01	3282.9	-0.004811	0.0364947	0.048118	0.040266	0	2862.93	3991.2	0.478329	0.0405339	31.4123	30.3012	27.5597	0.480933	0.0509599	9.43748	20.4181	19.2252	19.3032
rs117366037_Ref_A	rs117366037_center_fwd_NA	rs117366037	5	43004232	A	G	ref	center	fwd	NA	4758.62	5161.4	0.119725	0.0360864	3.04216	2.80519	0	5383.59	4803.72	-0.163813	0.0388845	4.59823	4.28362	0.745628	-0.285456	0.048544	-5.88036	8.38787	7.72656	7.80461
rs11737353_Ref_G	rs11737353_center_fwd_NA	rs11737353	4	77873365	G	A	ref	center	fwd	NA	3252.49	2946.55	-0.139275	0.0384706	3.53129	3.26688	0	2856.98	2227.24	-0.357962	0.0434463	15.761	15.02	11.9084	-0.220323	0.0549604	-4.00876	4.21439	3.78123	3.85885
rs11737861_Ref_C	rs11737861_center_fwd_NA	rs11737861	4	77866749	C	T	ref	center	fwd	NA	2121.47	2493.7	0.22942	0.0497892	5.39049	5.03705	1.53789	1578.53	1625.21	0.0467953	0.0637755	0.334325	0.288981	0	-0.18306	0.0752167	-2.43377	1.82557	1.57331	1.63356
rs117447509_Ref_G	rs117447509_center_fwd_NA	rs117447509	10	53202100	G	T	ref	center	fwd	NA	2563.71	2863.23	0.155913	0.0543937	2.38175	2.18109	0	2240.92	2497.3	0.156165	0.0469569	3.05457	2.81665	0	-0.0004291	0.0654962	-0.0065515	0.00227616	0.00196134	0.00208778
rs117486575_Ref_A	rs117486575_center_fwd_NA	rs117486575	7	120184999	A	T	ref	center	fwd	NA	5302	4581.18	-0.209536	0.0376732	7.57386	7.12765	3.72126	4488.43	3845.14	-0.218208	0.0366669	8.57455	8.09042	4.72195	-0.010371	0.0500229	-0.207325	0.0779203	0.0598809	0.0670021
rs117527287_Ref_G	rs117527287_center_fwd_NA	rs117527287	6	85020241	G	A	ref	center	fwd	NA	5920.58	6069.43	0.0317186	0.0312632	0.508201	0.444416	0	6194.91	6609.69	0.0913733	0.0377172	1.81219	1.64685	0	0.0568863	0.0488549	1.16439	0.612139	0.50387	NA
rs117547718_Ref_C	rs117547718_center_fwd_NA	rs117547718	3	114211132	C	T	ref	center	fwd	NA	1274.06	1384.58	0.121931	0.0642527	1.23854	1.11441	0	1335.33	1384.56	0.0430588	0.0552911	0.360396	0.312947	0	-0.0803885	0.0822689	-0.977144	0.483467	0.392005	NA
rs117562189_Ref_G	rs117562189_center_fwd_NA	rs117562189	17	45996767	G	A	ref	center	fwd	NA	6474.71	5978.2	-0.11591	0.0311049	3.71171	3.43805	0	5569.14	5549.75	-0.0050343	0.0321972	0.0576197	0.0483361	0	0.109111	0.0448369	2.4335	1.82526	1.57328	1.63354
rs117594742_Ref_T	rs117594742_center_fwd_NA	rs117594742	5	43008722	T	C	ref	center	fwd	NA	5014.32	27067.1	2.43231	0.158848	52.1983	50.6724	48.3457	3460.02	19194.5	2.472	0.126095	84.8474	82.8147	80.9948	0.0383395	0.137829	0.278166	0.107413	0.0818114	0.0907112
rs117595522_Ref_C	rs117595522_center_fwd_NA	rs117595522	17	7095190	C	T	ref	center	fwd	NA	4610.85	3341.06	-0.463061	0.0432741	25.9953	24.9959	22.1427	3727.26	3267.77	-0.190484	0.0445196	4.72579	4.40478	0.873188	0.27014	0.0531	5.08737	6.44003	5.87476	5.95281
rs117597747_Ref_C	rs117597747_center_fwd_NA	rs117597747	5	43065996	C	T	ref	center	fwd	NA	5969.02	6860.25	0.200208	0.0360707	7.54517	7.10007	3.69257	4281.76	4923.62	0.20467	0.0436979	5.55023	5.18915	1.69763	0.0039154	0.0511493	0.0765485	0.0273424	0.0216404	0.0235593
rs117636846_Ref_C	rs117636846_center_fwd_NA	rs117636846	7	119797796	C	T	ref	center	fwd	NA	4292.42	4107.93	-0.0675187	0.0332211	1.37558	1.24102	0	4733.47	4282.36	-0.146711	0.0424122	3.26612	3.01676	0	-0.0823804	0.0504128	-1.63412	0.990403	0.826645	0.873303
rs117658816_Ref_T	rs117658816_center_fwd_NA	rs117658816	7	120258709	T	C	ref	center	fwd	NA	2789.11	3445.43	0.30733	0.0495918	9.24046	8.72966	5.38786	2216.27	2419.75	0.129893	0.0423862	2.6615	2.44515	0	-0.180469	0.0605804	-2.979	2.53882	2.23081	2.29916
rs11766524_Ref_C	rs11766524_center_fwd_NA	rs11766524	7	119948217	C	T	ref	center	fwd	NA	3960.51	4999.76	0.33649	0.11469	2.47532	2.2687	0	3837.66	4596.3	0.260273	0.0353553	12.7407	12.105	8.88811	-0.0794103	0.0666295	-1.19182	0.632025	0.520717	0.555847
rs117675250_Ref_A	rs117675250_center_fwd_NA	rs117675250	20	7454716	A	C	ref	center	fwd	NA	3998.5	4733.39	0.240977	0.0455965	6.9006	6.48197	3.04799	3735.06	5104.66	0.448358	0.0391394	29.6558	28.5799	25.8032	0.206183	0.0580659	3.55084	3.41566	3.03959	3.11501
rs1176793_Ref_T	rs1176793_center_fwd_NA	rs1176793	14	40835756	T	C	ref	center	fwd	NA	4533.05	4347.56	-0.0598954	0.0342433	1.09544	0.981666	0	5170.52	4964.67	-0.0608498	0.040983	0.861357	0.766593	0	-0.003731	0.0483631	-0.077145	0.0275619	0.0216404	NA
rs1176796_Ref_G	rs1176796_center_fwd_NA	rs1176796	14	40831661	G	T	ref	center	fwd	NA	1384.66	1443.2	0.0545415	0.0618154	0.422969	0.368831	0	821.919	819.601	-0.0050972	0.0699389	0.0259947	0.0218555	0	-0.0611972	0.0875458	-0.699031	0.314677	0.251074	NA
rs1176869_Ref_C	rs1176869_center_fwd_NA	rs1176869	14	40807221	C	G	ref	center	fwd	NA	1553.94	2027.33	0.381232	0.0494299	13.909	13.2301	10.0564	1875.86	2154.5	0.210952	0.0486227	4.84338	4.51586	0.990776	-0.173676	0.0747296	-2.32405	1.69631	1.45789	1.51558
rs1176879_Ref_G	rs1176879_center_fwd_NA	rs1176879	14	40824421	G	T	ref	center	fwd	NA	3027.99	2970.34	-0.026319	0.0382346	0.308716	0.266477	0	4820.81	4963.62	0.0382255	0.0330908	0.605512	0.532042	0	0.0626152	0.0492238	1.27205	0.691746	0.57119	NA
rs1176953_Ref_A	rs1176953_center_fwd_NA	rs1176953	14	40934437	A	G	ref	center	fwd	NA	4178.31	3606.96	-0.207338	0.0378446	7.36798	6.9308	3.51538	3889.61	4053.97	0.0578293	0.0469906	0.660645	0.582415	0	0.263436	0.0569771	4.62355	5.42339	4.9205	4.99855
rs117793142_Ref_G	rs117793142_center_fwd_NA	rs117793142	5	43007174	G	A	ref	center	fwd	NA	2284.27	2995.11	0.390817	0.0555823	11.6891	11.0891	7.83653	2073.6	2715.13	0.387089	0.041732	19.7529	18.9031	15.9003	-0.0051065	0.0663982	-0.0769071	0.0274744	0.0216404	0.0235593
rs117849444_Ref_A	rs117849444_center_fwd_NA	rs117849444	5	42972428	A	G	ref	center	fwd	NA	4488.17	3838.27	-0.226169	0.0598777	3.79968	3.52066	0	4097.1	4306.74	0.0722237	0.0430603	1.02923	0.920783	0	0.29727	0.0616467	4.82215	5.84766	5.32088	5.39893
rs117870119_Ref_T	rs117870119_center_fwd_NA	rs117870119	6	76809641	T	G	ref	center	fwd	NA	1940.41	2262.05	0.227458	0.0460094	6.11554	5.7295	2.26294	2853.44	2826.1	-0.009822	0.0402099	0.0931144	0.0785931	0	-0.239533	0.0640259	-3.74119	3.73719	3.33847	3.41494
rs117886806_Ref_G	rs117886806_center_fwd_NA	rs117886806	7	120333456	G	A	ref	center	fwd	NA	2988.23	3260.86	0.124124	0.0450996	2.22771	2.03549	0	3490.45	4054.05	0.212931	0.0442008	5.8372	5.46338	1.9846	0.0866639	0.0570769	1.51837	0.889676	0.740357	0.784255
rs117914330_Ref_A	rs117914330_center_fwd_NA	rs117914330	16	87175886	A	G	ref	center	fwd	NA	1043.59	1155.24	0.151458	0.0666779	1.63606	1.48279	0	1575.1	1585.39	0.00582733	0.0567864	0.0370316	0.0307304	0	-0.149019	0.080172	-1.85875	1.20023	1.01241	NA
rs117953218_Ref_T	rs117953218_center_fwd_NA	rs117953218	17	47166708	T	C	ref	center	fwd	NA	1784.99	2202.78	0.307656	0.049313	9.35574	8.83856	5.50314	2258.65	2157.36	-0.0568369	0.0503184	0.587257	0.515375	0	-0.365609	0.0690388	-5.29571	6.92607	6.33703	6.41508
rs1179633562_Ref_G	rs1179633562_center_fwd_NA	rs1179633562	2	130665856	G	C	ref	center	fwd	NA	5946.98	5117.59	-0.215684	0.0435571	6.13339	5.74662	2.28079	5360.36	4684.74	-0.191049	0.0347879	7.4003	6.96229	3.5477	0.0224505	0.0483696	0.464145	0.192097	0.148954	0.163088
rs117967427_Ref_C	rs117967427_center_fwd_NA	rs117967427	5	43025537	C	T	ref	center	fwd	NA	4690.16	5529.25	0.239401	0.0348134	11.2128	10.6282	7.36022	4868.85	4500.47	-0.110664	0.0428868	2.00572	1.82784	0	-0.350418	0.0485635	-7.21567	12.2703	11.3999	11.478
rs117990338_Ref_C	rs117990338_center_fwd_NA	rs117990338	17	45990990	C	T	ref	center	fwd	NA	4099.35	4824.02	0.229922	0.0367842	9.38832	8.87013	5.53572	4210.99	4769.69	0.178008	0.0327039	7.28077	6.84709	3.42817	-0.0533262	0.0507469	-1.05083	0.532631	0.435065	0.465053
rs118009815_Ref_T	rs118009815_center_fwd_NA	rs118009815	7	120234675	T	A	ref	center	fwd	NA	2633.42	2704.2	0.0374024	0.0397245	0.46039	0.401421	0	2426.64	3917.31	0.694546	0.0356087	84.0014	81.9785	80.1488	0.65525	0.0514509	12.7354	36.4251	34.5639	34.642
rs1180320287_Ref_T	rs1180320287_center_fwd_NA	rs1180320287	11	59296924	T	A	ref	center	fwd	NA	2819.22	2545.07	-0.144391	0.0426583	3.14739	2.90432	0	3411.73	4159.98	0.282904	0.0380858	12.9578	12.3132	9.10522	0.424394	0.0523895	8.10076	15.2627	14.2611	14.3391
rs11812207_Ref_C	rs11812207_center_fwd_NA	rs11812207	10	30752351	C	T	ref	center	fwd	NA	5732.7	6124.22	0.0926498	0.0338665	2.20592	2.01493	0	5366.21	4732.01	-0.180647	0.0418414	4.80174	4.47701	0.94914	-0.274611	0.0473877	-5.79498	8.16539	7.51827	7.59632
rs11812218_Ref_G	rs11812218_center_fwd_NA	rs11812218	10	30752292	G	A	ref	center	fwd	NA	4632.96	4037.61	-0.198966	0.0362271	7.40125	6.96307	3.54865	5075.31	4359.27	-0.220909	0.0401002	7.44244	7.00191	3.58984	-0.0241566	0.049934	-0.483771	0.201661	0.156083	0.171474
rs11812238_Ref_G	rs11812238_center_fwd_NA	rs11812238	10	30752386	G	A	ref	center	fwd	NA	4526.26	4801.19	0.0890246	0.0340514	2.04876	1.86746	0	4891.48	6687.19	0.451212	0.0451673	22.7723	21.8499	18.9197	0.360808	0.0494682	7.29374	12.5208	11.6337	11.7118
rs118142536_Ref_T	rs118142536_center_fwd_NA	rs118142536	20	14340855	T	A	ref	center	fwd	NA	5312.29	4692.88	-0.182909	0.03313	7.47218	7.02987	3.61958	6289.26	5920.73	-0.0867958	0.0323893	2.13269	1.94627	0	0.0948167	0.0434131	2.18406	1.53823	1.31625	1.37252
rs118162831_Ref_C	rs118162831_center_fwd_NA	rs118162831	20	6999102	C	T	ref	center	fwd	NA	1332.67	1293.32	-0.0338571	0.062366	0.231203	0.19861	0	1158.54	1090.58	-0.0945855	0.0627194	0.880956	0.78448	0	-0.0634816	0.0860798	-0.737474	0.336455	0.269181	NA
rs118166521_Ref_G	rs118166521_center_fwd_NA	rs118166521	17	7099658	G	A	ref	center	fwd	NA	4172.29	3554.68	-0.230767	0.0538916	4.73241	4.41076	0.879808	4862.09	6391.37	0.390122	0.0405938	21.141	20.2558	17.2884	0.619179	0.0591252	10.4723	24.9365	23.56	23.6381
rs1183111_Ref_A	rs1183111_center_fwd_NA	rs1183111	14	40827644	A	C	ref	center	fwd	NA	3724.4	4012.85	0.103815	0.0487638	1.4781	1.33627	0	4679.12	3666.41	-0.349017	0.0338071	24.2596	23.2986	20.407	-0.453716	0.056381	-8.04732	15.0725	14.0741	14.1521
rs11844124_Ref_G	rs11844124_center_fwd_NA	rs11844124	14	24579930	G	A	ref	center	fwd	NA	5202.61	5933.77	0.189579	0.0346246	7.35966	6.92257	3.50706	4648.62	3984.3	-0.222383	0.0392708	7.82707	7.37199	3.97447	-0.413788	0.0469059	-8.82165	17.9478	16.8473	16.9253
rs11846693_Ref_G	rs11846693_center_fwd_NA	rs11846693	14	96296703	G	C	ref	center	fwd	NA	2774.43	3478.67	0.323333	0.0492361	10.2895	9.73809	6.43691	3935.98	4907.88	0.323901	0.04238	13.6724	13.0017	9.81982	-0.0017508	0.0662643	-0.0264209	0.00925208	0.00688535	0.00812062
rs1186149640_Ref_G	rs1186149640_center_fwd_NA	rs1186149640	7	119246960	G	A	ref	center	fwd	NA	5963.77	7988.52	0.421186	0.0444843	20.5456	19.6774	16.693	4937.25	5266.72	0.0920909	0.0392782	1.72014	1.56057	0	-0.330742	0.051007	-6.48425	10.0498	9.30783	9.38588
rs11872184_Ref_G	rs11872184_center_fwd_NA	rs11872184	18	2739735	G	A	ref	center	fwd	NA	2873.77	2584.37	-0.156281	0.0434303	3.49464	3.23246	0	1958.45	1729.15	-0.182997	0.0516969	3.39748	3.14079	0	-0.0292841	0.0614942	-0.476209	0.197962	0.153601	0.168147
rs1187261717_Ref_A	rs1187261717_center_fwd_NA	rs1187261717	5	43063165	A	G	ref	center	fwd	NA	639.453	632.556	-0.0120952	0.0887421	0.049836	0.0417043	0	968.225	861.003	-0.175105	0.0725854	1.80003	1.63532	0	-0.166024	0.105362	-1.57574	0.938981	0.781825	NA
rs11874_Ref_G	rs11874_center_fwd_NA	rs11874	17	46939827	G	A	ref	center	fwd	NA	4829.16	5169.05	0.0995807	0.0335932	2.51804	2.30901	0	3660.41	2858.93	-0.355608	0.0427558	16.0454	15.2961	12.1928	-0.456858	0.0478652	-9.54468	20.8648	19.6486	19.7266
rs11876511_Ref_A	rs11876511_center_fwd_NA	rs11876511	18	2728330	A	G	ref	center	fwd	NA	2901.99	3867.47	0.420543	0.0354616	31.7145	30.5999	27.8619	4196.22	5187.86	0.304575	0.0324926	20.1546	19.2942	16.302	-0.118166	0.0471931	-2.50388	1.91066	1.65048	1.7113
rs1187749435_Ref_C	rs1187749435_center_fwd_NA	rs1187749435	6	158350764	C	A	ref	center	fwd	NA	3932.09	5101.58	0.375485	0.034953	26.1922	25.187	22.3396	3921.9	6237.5	0.669868	0.0406413	60.3092	58.6431	56.4566	0.292716	0.0484865	6.03706	8.80424	8.12526	8.20331
rs11880872_Ref_A	rs11880872_center_fwd_NA	rs11880872	19	50023786	A	G	ref	center	fwd	NA	5803.05	5560.92	-0.0587236	0.0359941	0.988051	0.882644	0	4882.85	4725.49	-0.0488314	0.035235	0.780458	0.692024	0	0.00729681	0.0464137	0.157213	0.0579535	0.0444982	NA
rs1188503861_Ref_T	rs1188503861_center_fwd_NA	rs1188503861	16	87950867	T	C	ref	center	fwd	NA	3649.89	13247.9	1.86022	0.0970596	81.1458	79.1598	77.2932	3778.65	14315.1	1.92153	0.0916516	96.8691	94.6652	93.0165	0.0591818	0.0971897	0.608931	0.265544	0.209347	0.228405
rs11886179_Ref_C	rs11886179_center_fwd_NA	rs11886179	2	239515718	C	T	ref	center	fwd	NA	5065.97	5021.57	-0.0134123	0.0342092	0.158011	0.134692	0	4186.85	4248.53	0.0184098	0.0340802	0.229836	0.197374	0	0.0297424	0.0450248	0.660577	0.293381	0.233392	NA
rs11888302_Ref_A	rs11888302_center_fwd_NA	rs11888302	2	239515605	A	G	ref	center	fwd	NA	3966.93	4400.37	0.149212	0.0342117	4.88868	4.55882	1.03608	5212.87	3894.03	-0.419312	0.0448298	20.0713	19.2138	16.2187	-0.569308	0.0489567	-11.6288	30.5314	28.9538	29.0318
rs11895588_Ref_G	rs11895588_center_fwd_NA	rs11895588	2	141204588	G	T	ref	center	fwd	NA	1767.48	1871.54	0.0893123	0.0494335	1.14993	1.03233	0	1343.59	1326.27	-0.0163809	0.0685238	0.0909453	0.0768971	0	-0.10538	0.0780538	-1.3501	0.752064	0.621636	NA
rs11900941_Ref_C	rs11900941_center_fwd_NA	rs11900941	2	157955530	C	T	ref	center	fwd	NA	4240.8	33108.7	2.96492	0.209807	44.6155	43.2439	40.7629	4500.4	8478.09	0.914384	0.0656134	43.4166	42.0648	39.564	-2.05231	0.142996	-14.3522	45.9862	43.7757	43.8537
rs11902930_Ref_G	rs11902930_center_fwd_NA	rs11902930	2	141215374	G	A	ref	center	fwd	NA	4130.02	5204.33	0.33486	0.0316509	25.4321	24.4426	21.5795	4587.59	4347.36	-0.0804824	0.0340597	1.74163	1.58092	0	-0.417813	0.0439161	-9.5139	20.736	19.5287	19.6067
rs11904437_Ref_A	rs11904437_center_fwd_NA	rs11904437	2	157974013	A	C	ref	center	fwd	NA	3874.74	3951.44	0.026308	0.0392633	0.298577	0.25758	0	4260.42	4234.79	-0.0096134	0.0341859	0.108714	0.0922006	0	-0.0373497	0.0489424	-0.763137	0.351268	0.282065	NA
rs11929843_Ref_A	rs11929843_center_fwd_NA	rs11929843	4	167913578	A	G	ref	center	fwd	NA	5315.72	8683.4	0.707978	0.203448	3.29963	3.04809	0	4438.56	7091.69	0.676282	0.18917	3.45563	3.19557	0	-0.0326195	0.197703	-0.164992	0.0610052	0.04677	0.0520621
rs11930954_Ref_T	rs11930954_center_fwd_NA	rs11930954	4	167914024	T	C	ref	center	fwd	NA	3713.94	4673.98	0.331269	0.0429153	13.9314	13.2519	10.0788	3955.69	4731.82	0.256692	0.032432	14.6061	13.9054	10.7535	-0.076084	0.0489769	-1.55347	0.919692	0.765464	0.810413
rs11931623_Ref_A	rs11931623_center_fwd_NA	rs11931623	4	175029047	A	G	ref	center	fwd	NA	2603.74	2420.25	-0.105544	0.0473038	1.5906	1.4404	0	2513.04	2048.42	-0.293644	0.0691914	4.6583	4.34066	0.805694	-0.188978	0.0721964	-2.61755	2.05274	1.7818	1.84461
rs1193887803_Ref_A	rs1193887803_center_fwd_NA	rs1193887803	7	16922731	A	C	ref	center	fwd	NA	723.163	712.169	-0.0351769	0.1071	0.129261	0.109885	0	1003.27	2257.54	1.17903	0.0536858	106.173	103.84	102.321	1.21876	0.106599	11.4331	29.5442	28.0009	28.079
rs11942607_Ref_G	rs11942607_center_fwd_NA	rs11942607	4	56912782	G	A	ref	center	fwd	NA	4393.06	5404.55	0.304632	0.031748	21.0775	20.1944	17.2249	4950.11	5381.51	0.118641	0.0434821	2.19638	2.0061	0	-0.187697	0.0497309	-3.77426	3.79458	3.3907	3.46755
rs11990740_Ref_G	rs11990740_center_fwd_NA	rs11990740	8	57384689	G	A	ref	center	fwd	NA	7040.37	6708.35	-0.0671372	0.0366257	1.17527	1.05603	0	5363.45	4695.04	-0.186159	0.0338535	7.41789	6.97853	3.56529	-0.121712	0.0523434	-2.32527	1.69772	1.45902	1.5167
rs11991955_Ref_T	rs11991955_center_fwd_NA	rs11991955	8	57417029	T	C	ref	center	fwd	NA	5097.8	5918.48	0.214213	0.0338885	9.58553	9.06015	5.73293	4631.37	6650.65	0.524315	0.0419608	35.1015	33.9232	31.2489	0.309321	0.0478835	6.45986	9.97964	9.24288	9.32093
rs11994454_Ref_T	rs11994454_center_fwd_NA	rs11994454	8	57384548	T	C	ref	center	fwd	NA	5445.47	4470.66	-0.279454	0.0344224	15.3256	14.6005	11.473	4141.46	3104.35	-0.415934	0.048546	16.977	16.201	13.1244	-0.13775	0.0529333	-2.60232	2.03342	1.76336	1.82589
rs11994487_Ref_T	rs11994487_center_fwd_NA	rs11994487	8	57384679	T	A	ref	center	fwd	NA	6550.57	6545.95	-0.0008288	0.0312736	0.00928077	0.00756854	0	5583.19	4538.13	-0.295009	0.0338396	17.5474	16.7592	13.6948	-0.295382	0.0437881	-6.74571	10.8174	10.0373	10.1154
rs11997856_Ref_A	rs11997856_center_fwd_NA	rs11997856	8	57384722	A	G	ref	center	fwd	NA	5206.55	4467.14	-0.22566	0.032558	11.379	10.7886	7.52639	4467.63	5651.27	0.343368	0.0326065	25.2048	24.2218	21.3522	0.567012	0.0468617	12.0997	32.9747	31.2662	31.3442
rs12002165_Ref_G	rs12002165_center_fwd_NA	rs12002165	9	12172772	G	A	ref	center	fwd	NA	5213.29	5117.37	-0.027255	0.0425517	0.282464	0.243742	0	3419.25	5310.79	0.635801	0.0497931	36.6113	35.3991	32.7587	0.661411	0.0588561	11.2378	28.5751	27.0613	27.1394
rs1201916647_Ref_C	rs1201916647_center_fwd_NA	rs1201916647	2	29665003	C	T	ref	center	fwd	NA	2721.44	2600.31	-0.0599628	0.0488259	0.65874	0.580911	0	1586.83	1465.32	-0.115706	0.0546202	1.4667	1.32585	0	-0.0587796	0.0667989	-0.879949	0.42149	0.340037	NA
rs12025272_Ref_A	rs12025272_center_fwd_NA	rs12025272	1	204900431	A	G	ref	center	fwd	NA	2978.27	3655.01	0.297203	0.0405617	12.6289	11.9952	8.77628	2978.85	4049.65	0.453208	0.0344585	38.7822	37.5249	34.9296	0.152469	0.0536064	2.84424	2.35146	2.05637	2.12214
rs12031458_Ref_T	rs12031458_center_fwd_NA	rs12031458	1	150657925	T	G	ref	center	fwd	NA	3977.56	4572.41	0.202189	0.0383172	6.88104	6.46321	3.02843	4577.12	4468.72	-0.0393338	0.0330404	0.631044	0.555364	0	-0.243341	0.0486234	-5.00461	6.25199	5.69701	5.77506
rs12032445_Ref_T	rs12032445_center_fwd_NA	rs12032445	1	150658834	T	C	ref	center	fwd	NA	5875.77	5223.84	-0.169529	0.0337834	6.28247	5.88895	2.42987	5730.05	5510.67	-0.0545305	0.03192	1.05764	0.94707	0	0.113333	0.0427763	2.64944	2.09353	1.81935	1.88204
rs12040707_Ref_T	rs12040707_center_fwd_NA	rs12040707	1	150948588	T	C	ref	center	fwd	NA	4744.07	4231.35	-0.163543	0.0322827	6.39108	5.99316	2.53848	4002.69	3834.6	-0.0619143	0.0395198	0.931099	0.830489	0	0.0997553	0.0466974	2.13621	1.48595	1.2675	1.32285
rs12042263_Ref_G	rs12042263_center_fwd_NA	rs12042263	1	150942362	G	A	ref	center	fwd	NA	5389.97	5895.14	0.125166	0.0388546	2.89425	2.66521	0	5280.05	5376.17	0.0266492	0.033953	0.363993	0.316067	0	-0.0992103	0.0483738	-2.05091	1.39496	1.18628	1.24054
rs12045807_Ref_T	rs12045807_center_fwd_NA	rs12045807	1	150612358	T	C	ref	center	fwd	NA	3861.03	3465.11	-0.152268	0.0405026	3.76884	3.49185	0	3918.51	4101.58	0.0655924	0.0334298	1.30319	1.17416	0	0.214748	0.0486053	4.4182	5.00207	4.52068	4.59873
rs12047221_Ref_G	rs12047221_center_fwd_NA	rs12047221	1	204880222	G	A	ref	center	fwd	NA	3834.34	3271.53	-0.225149	0.040564	7.54529	7.10011	3.69269	4821.8	5212.34	0.111355	0.0406148	2.21386	2.02223	0	0.333762	0.0509814	6.54674	10.2306	9.48164	9.55969
rs1207491252_Ref_G	rs1207491252_center_fwd_NA	rs1207491252	10	52563864	G	A	ref	center	fwd	NA	2824.84	2627.44	-0.106849	0.0400641	2.11609	1.93074	0	2127.54	2423.6	0.194022	0.0441049	4.96377	4.62998	1.11116	0.299833	0.0570189	5.25848	6.83789	6.2531	6.33115
rs12102248_Ref_A	rs12102248_center_fwd_NA	rs12102248	15	68656289	A	C	ref	center	fwd	NA	5355.54	7687.58	0.518928	0.040734	36.4473	35.2395	32.5947	4354.7	5385.78	0.307422	0.0368647	16.1261	15.3742	12.2735	-0.212376	0.0491864	-4.31777	4.80241	4.3379	4.41595
rs12108312_Ref_A	rs12108312_center_fwd_NA	rs12108312	4	77931905	A	G	ref	center	fwd	NA	3757.9	4052.54	0.109977	0.0334281	2.99912	2.76472	0	3067.13	2960.79	-0.052826	0.0411648	0.700288	0.618426	0	-0.165316	0.0486616	-3.39726	3.16707	2.80715	2.88086
rs12111255_Ref_C	rs12111255_center_fwd_NA	rs12111255	6	9303152	C	T	ref	center	fwd	NA	3185.69	3154.61	-0.0109178	0.0403655	0.104138	0.0881343	0	2993.24	3077.86	0.0313598	0.0373293	0.397006	0.345419	0	0.0404963	0.0540944	0.748623	0.342864	0.274866	NA
rs12146332_Ref_C	rs12146332_center_fwd_NA	rs12146332	10	8527279	C	T	ref	center	fwd	NA	5701.62	4608.25	-0.306277	0.032267	20.6445	19.7744	16.7919	3738.92	3901.52	0.0627871	0.0405108	0.916606	0.816765	0	0.367877	0.0492214	7.47393	13.1088	12.1968	12.2749
rs12147169_Ref_G	rs12147169_center_fwd_NA	rs12147169	14	24598852	G	A	ref	center	fwd	NA	2258.49	2174.82	-0.0511632	0.0557469	0.445226	0.38807	0	3171.35	3259.73	0.0445497	0.0373782	0.632059	0.556161	0	0.0913443	0.0628746	1.4528	0.834819	0.691232	NA
rs12150130_Ref_C	rs12150130_center_fwd_NA	rs12150130	17	14213965	C	T	ref	center	fwd	NA	4420.45	4028.73	-0.131448	0.0366473	3.47534	3.21411	0	3859.36	2860.42	-0.435314	0.0429405	23.4245	22.4845	19.5719	-0.306191	0.054613	-5.60657	7.68534	7.06001	7.13806
rs12153339_Ref_A	rs12153339_center_fwd_NA	rs12153339	5	51881771	A	G	ref	center	fwd	NA	2274.65	2628.2	0.20842	0.051059	4.35007	4.04604	0.497467	2234.97	1913.05	-0.227523	0.0481634	5.63587	5.27113	1.78327	-0.438176	0.0640796	-6.838	11.0953	10.2978	10.3758
rs1215473741_Ref_A	rs1215473741_center_fwd_NA	rs1215473741	14	24599889	A	T	ref	center	fwd	NA	1518.14	1201.88	-0.329041	0.0595677	7.47924	7.03652	3.62664	1619.59	3018.66	0.896282	0.0425847	97.6137	95.3999	93.7611	1.22105	0.0687243	17.7674	69.8985	67.1566	67.2347
rs1216087205_Ref_GTTC	rs1216087205_center_fwd_NA	rs1216087205	20	6360857	GTTC	G	ref	center	fwd	NA	3848.66	3896.99	0.0191261	0.034683	0.235583	0.202661	0	3681.07	2915.15	-0.334535	0.048783	11.1548	10.5728	7.30219	-0.354032	0.0519018	-6.82119	11.0444	10.2518	10.3299
rs12173281_Ref_G	rs12173281_center_fwd_NA	rs12173281	6	158309894	G	A	ref	center	fwd	NA	4075.72	6990.14	0.779349	0.047391	60.0411	58.3806	56.1885	4257.56	6125.04	0.519969	0.0379476	42.0071	40.6895	38.1545	-0.26145	0.0547114	-4.7787	5.75343	5.23108	5.30913
rs12175251_Ref_A	rs12175251_center_fwd_NA	rs12175251	6	49492078	A	G	ref	center	fwd	NA	5158.69	6279.23	0.279975	0.0340202	15.7265	14.9872	11.8739	3678.44	4273.57	0.217748	0.0351829	9.21804	8.70793	5.36544	-0.0633702	0.0452522	-1.40038	0.792097	0.656325	0.697348
rs1217750_Ref_G	rs1217750_center_fwd_NA	rs1217750	5	71953613	G	A	ref	center	fwd	NA	3722.45	4434.17	0.255009	0.0327234	14.1837	13.4957	10.3311	4163.13	4117.38	-0.0136071	0.0371418	0.146242	0.124402	0	-0.269964	0.0473804	-5.69779	7.91589	7.2798	7.35785
rs1217752_Ref_A	rs1217752_center_fwd_NA	rs1217752	5	71956619	A	T	ref	center	fwd	NA	3354.62	3465.31	0.0466498	0.036527	0.695606	0.61438	0	3418.05	3451.84	0.0162592	0.0370411	0.179998	0.153739	0	-0.0320038	0.048386	-0.661425	0.293846	0.23351	NA
rs1218206488_Ref_T	rs1218206488_center_fwd_NA	rs1218206488	5	23384529	T	A	ref	center	fwd	NA	4238.54	3194.77	-0.408358	0.045069	18.8874	18.0621	15.0348	3505.53	3645.72	0.0487276	0.0363828	0.74359	0.658288	0	0.456081	0.0537444	8.48611	16.6703	15.6167	15.6948
rs1218602223_Ref_T	rs1218602223_center_fwd_NA	rs1218602223	6	158328081	T	G	ref	center	fwd	NA	360.702	311.767	-0.214637	0.111338	1.26857	1.14208	0	3140.92	3927.16	0.316306	0.0449705	11.6963	11.0959	7.84373	0.530215	0.0965455	5.49187	7.40043	6.79075	6.8688
rs12186641_Ref_C	rs12186641_center_fwd_NA	rs12186641	5	51868281	C	T	ref	center	fwd	NA	2950.66	3824.89	0.377008	0.0364216	24.3838	23.42	20.5312	2454.51	2084.14	-0.236788	0.0455935	6.68523	6.27477	2.83263	-0.616051	0.0547256	-11.2571	28.6702	27.1431	27.2212
rs12187903_Ref_C	rs12187903_center_fwd_NA	rs12187903	5	104604069	C	T	ref	center	fwd	NA	4113.41	3602.91	-0.193273	0.0366502	6.87329	6.45578	3.02069	3677.74	3763.16	0.0321399	0.0525846	0.266751	0.229941	0	0.222688	0.0562461	3.95918	4.12374	3.69732	3.77495
rs12193434_Ref_T	rs12193434_center_fwd_NA	rs12193434	6	11962513	T	C	ref	center	fwd	NA	4968.86	5376.69	0.115366	0.0315916	3.58431	3.3172	0	3537.97	3599.41	0.016733	0.0414376	0.163454	0.139491	0	-0.100963	0.0533407	-1.8928	1.2337	1.04223	1.09356
rs12196741_Ref_C	rs12196741_center_fwd_NA	rs12196741	6	11934245	C	T	ref	center	fwd	NA	4929.66	6124.96	0.314559	0.0369349	16.7842	16.0132	12.9316	4499.47	5091.01	0.179416	0.0329559	7.28351	6.84941	3.43091	-0.13743	0.0455674	-3.01597	2.59149	2.27607	2.34557
rs12219100_Ref_T	rs12219100_center_fwd_NA	rs12219100	10	20977435	T	C	ref	center	fwd	NA	4749.51	6104.79	0.366782	0.0314578	30.6877	29.5936	26.8351	2811.83	3592.25	0.360357	0.0383477	20.2511	19.3886	16.3985	-0.0072414	0.0478998	-0.151177	0.0555983	0.0441185	0.0485735
rs12235141_Ref_A	rs12235141_center_fwd_NA	rs12235141	9	11819477	A	G	ref	center	fwd	NA	4149.09	4016.88	-0.0497398	0.0404253	0.660464	0.582307	0	3805.33	3189.06	-0.257992	0.0371291	11.4328	10.841	7.58016	-0.209472	0.0510716	-4.10154	4.38678	3.94673	4.02478
rs12254926_Ref_A	rs12254926_center_fwd_NA	rs12254926	10	44627296	A	G	ref	center	fwd	NA	1995.23	1875.23	-0.0884393	0.0468929	1.22697	1.10374	0	2291.29	3214.11	0.482845	0.0623541	14.0148	13.3324	10.1622	0.567212	0.0732769	7.74067	14.0048	13.0482	13.1263
rs12313315_Ref_G	rs12313315_center_fwd_NA	rs12313315	4	175021862	G	A	ref	center	fwd	NA	3415.98	3650.13	0.0928771	0.036247	1.98309	1.80659	0	4256.42	4031.7	-0.0832093	0.0377267	1.56204	1.41408	0	-0.178136	0.054269	-3.28246	2.98757	2.64008	NA
rs1232015584_Ref_G	rs1232015584_center_fwd_NA	rs1232015584	8	87815578	G	A	ref	center	fwd	NA	3218.62	3582.01	0.148331	0.0386492	3.90624	3.62156	0.0536387	3201.17	2877.52	-0.151441	0.0404544	3.74117	3.46567	0	-0.301077	0.0535318	-5.62426	7.72977	7.10311	7.18116
rs1232775540_Ref_C	rs1232775540_center_fwd_NA	rs1232775540	10	1580503	C	T	ref	center	fwd	NA	2928.61	2861.15	-0.0350167	0.0582689	0.26132	0.225226	0	2562.13	3324.59	0.372322	0.0499449	13.0452	12.397	9.19264	0.405853	0.0687061	5.90708	8.45814	7.79394	7.87199
rs12331312_Ref_T	rs12331312_center_fwd_NA	rs12331312	4	167922577	T	G	ref	center	fwd	NA	5233.26	5286.78	0.022602	0.0320183	0.318536	0.275085	0	4337.68	4004.64	-0.116364	0.0352547	3.01568	2.78027	0	-0.140105	0.0483987	-2.8948	2.42091	2.12114	2.18774
rs12343160_Ref_T	rs12343160_center_fwd_NA	rs12343160	9	12133126	T	A	ref	center	fwd	NA	2312.64	2972.17	0.359561	0.0420558	16.9083	16.1343	13.0557	3000.64	2951.93	-0.0192843	0.0383448	0.211109	0.181303	0	-0.380334	0.0543647	-6.99598	11.5794	10.7512	10.8292
rs12343205_Ref_T	rs12343205_center_fwd_NA	rs12343205	9	12133279	T	A	ref	center	fwd	NA	3907.67	4473.03	0.196107	0.0434343	5.19855	4.85396	1.34595	4397.15	6120.39	0.476222	0.0383431	34.6914	33.5222	30.8388	0.277678	0.0495845	5.60009	7.6691	7.04576	7.12381
rs12352095_Ref_G	rs12352095_center_fwd_NA	rs12352095	9	12154744	G	T	ref	center	fwd	NA	3892.47	3277.05	-0.246094	0.0498485	6.10019	5.71497	2.24759	2731.13	2688.43	-0.0254424	0.0426786	0.258783	0.223153	0	0.217545	0.0572488	3.79999	3.83952	3.43284	3.50968
rs12352337_Ref_T	rs12352337_center_fwd_NA	rs12352337	9	12075463	T	C	ref	center	fwd	NA	889.081	761.872	-0.207942	0.07716	2.15243	1.96488	0	699.653	975.981	0.479275	0.106679	5.15287	4.81058	1.30027	0.688281	0.122885	5.60103	7.67144	7.04744	7.12549
rs12353026_Ref_G	rs12353026_center_fwd_NA	rs12353026	9	12185037	G	T	ref	center	fwd	NA	1607.37	1906.19	0.232102	0.0504452	5.3764	5.02385	1.5238	1754.6	1461.5	-0.262711	0.0581402	5.20579	4.86094	1.35319	-0.497179	0.0738863	-6.72897	10.7673	9.98825	10.0663
rs12356888_Ref_C	rs12356888_center_fwd_NA	rs12356888	10	8517746	C	T	ref	center	fwd	NA	3653.04	3027.09	-0.272085	0.0372979	12.5245	11.894	8.67192	3622.63	4098.05	0.180628	0.0421992	4.72912	4.40778	0.876515	0.451583	0.053862	8.38407	16.2913	15.2518	15.3299
rs12357784_Ref_C	rs12357784_center_fwd_NA	rs12357784	10	8520136	C	T	ref	center	fwd	NA	5356.3	5175.28	-0.0507897	0.0332417	0.897776	0.799851	0	3611.57	3348.23	-0.109252	0.0359507	2.62447	2.41028	0	-0.0602941	0.0488775	-1.23357	0.662817	0.547013	0.582807
rs12358417_Ref_A	rs12358417_center_fwd_NA	rs12358417	10	8517798	A	C	ref	center	fwd	NA	4661.32	4148.18	-0.168088	0.0367068	5.33092	4.98029	1.47832	4189.29	3739.43	-0.163146	0.0343778	5.68236	5.31571	1.82976	0.00312298	0.046131	0.067698	0.0240969	0.0196685	0.021831
rs12361774_Ref_T	rs12361774_center_fwd_NA	rs12361774	11	63114913	T	A	ref	center	fwd	NA	4041.15	4427.82	0.133607	0.0342035	4.02808	3.73825	0.175475	5554.23	5187.38	-0.1018	0.033343	2.64498	2.42958	0	-0.236617	0.0508977	-4.64886	5.47655	4.97165	5.0497
rs12363274_Ref_T	rs12363274_center_fwd_NA	rs12363274	11	63094205	T	C	ref	center	fwd	NA	281.054	242.218	-0.204545	0.133238	0.903997	0.805498	0	207.223	213.358	0.0549559	0.146242	0.150534	0.128084	0	0.258405	0.197935	1.3055	0.717327	0.592598	NA
rs12364908_Ref_A	rs12364908_center_fwd_NA	rs12364908	11	63134059	A	C	ref	center	fwd	NA	2301.06	3717.84	0.690846	0.0497759	43.0717	41.7294	39.2191	1880.67	1467.77	-0.362488	0.0539833	10.7252	10.1595	6.87258	-1.05588	0.0681317	-15.4977	53.444	51.117	51.1951
rs12366596_Ref_C	rs12366596_center_fwd_NA	rs12366596	12	69960383	C	T	ref	center	fwd	NA	3978.22	5008.44	0.3312	0.0481385	11.2234	10.6383	7.37076	5012.33	5534.23	0.147524	0.0318136	5.45192	5.09619	1.59931	-0.185979	0.0528306	-3.5203	3.36546	2.99274	3.06781
rs12367098_Ref_A	rs12367098_center_fwd_NA	rs12367098	12	69989693	A	G	ref	center	fwd	NA	1861.63	1537	-0.272578	0.0539297	6.36458	5.96772	2.51197	2341.69	1950.39	-0.260746	0.0626319	4.50324	4.19265	0.65064	0.01122	0.0741356	0.151345	0.0556636	0.0441185	0.0485735
rs12372613_Ref_A	rs12372613_center_fwd_NA	rs12372613	12	121225308	A	G	ref	center	fwd	NA	4173.62	5045.71	0.275037	0.034656	14.681	13.9778	10.8284	4665.4	5385.06	0.210333	0.0318177	10.4169	9.86148	6.56434	-0.0666355	0.0441081	-1.51073	0.883203	0.734772	0.778502
rs1238268538_Ref_T	rs1238268538_center_fwd_NA	rs1238268538	2	29644399	T	A	ref	center	fwd	NA	4027.26	3714.56	-0.11405	0.0436676	2.04542	1.86445	0	3421.39	4769.57	0.469437	0.0363446	37.4385	36.2116	33.5859	0.582739	0.0564852	10.3167	24.2274	22.8693	22.9473
rs12405381_Ref_C	rs12405381_center_fwd_NA	rs12405381	1	204892256	C	T	ref	center	fwd	NA	3712.99	4349.44	0.226403	0.040804	7.54056	7.09563	3.68796	2784.33	3322.01	0.246134	0.0380096	10.0248	9.48321	6.17216	0.0190005	0.0572368	0.331963	0.130817	0.10001	0.110775
rs12410154_Ref_G	rs12410154_center_fwd_NA	rs12410154	1	204880028	G	T	ref	center	fwd	NA	4075.79	4262.34	0.0604756	0.0414246	0.840679	0.747544	0	4101.02	3933.38	-0.0650466	0.0384906	1.04076	0.931528	0	-0.126674	0.0531404	-2.38376	1.76607	1.52051	NA
rs12420866_Ref_A	rs12420866_center_fwd_NA	rs12420866	11	63228778	A	G	ref	center	fwd	NA	2874.12	2251.71	-0.351543	0.0421079	16.1608	15.4077	12.3082	2823.45	2934.19	0.0614934	0.0421487	0.839906	0.746847	0	0.411919	0.0569337	7.23506	12.3322	11.4548	11.5329
rs12432418_Ref_G	rs12432418_center_fwd_NA	rs12432418	14	96336274	G	T	ref	center	fwd	NA	2369.11	2604.68	0.133178	0.0491284	2.17316	1.98439	0	2767.61	2749.74	-0.0146033	0.0444863	0.12918	0.109836	0	-0.149006	0.0659729	-2.2586	1.62145	1.39139	NA
rs12432561_Ref_G	rs12432561_center_fwd_NA	rs12432561	14	96295934	G	A	ref	center	fwd	NA	1857.78	1698.79	-0.132036	0.0493364	2.12812	1.94217	0	3549.68	2937.26	-0.271353	0.0408029	10.5339	9.97419	6.68134	-0.140139	0.0582309	-2.4066	1.79313	1.54423	1.60404
rs12433000_Ref_T	rs12433000_center_fwd_NA	rs12433000	14	40938894	T	C	ref	center	fwd	NA	2755.12	2377.15	-0.21569	0.0414584	6.7065	6.29517	2.8539	2340.63	2071.1	-0.177387	0.0483648	3.61126	3.34245	0	0.0363117	0.0578722	0.627446	0.275423	0.217251	0.237052
rs12435477_Ref_G	rs12435477_center_fwd_NA	rs12435477	14	96286975	G	T	ref	center	fwd	NA	3528.53	19541.6	2.46973	0.153891	57.2327	55.621	53.3801	3652.15	14152	1.95424	0.141714	42.5332	41.2048	38.6806	-0.516685	0.21553	-2.39727	1.78205	1.53455	1.59412
rs12447695_Ref_C	rs12447695_center_fwd_NA	rs12447695	16	86884772	C	T	ref	center	fwd	NA	4803.62	6168.75	0.359065	0.0373877	21.1133	20.2289	17.2607	5361.16	7050.98	0.396693	0.0349874	29.0712	28.0068	25.2186	0.036423	0.0464296	0.784479	0.363754	0.290411	0.314972
rs12501681_Ref_G	rs12501681_center_fwd_NA	rs12501681	4	111863283	G	A	ref	center	fwd	NA	3107.04	3171.35	0.0239022	0.0405019	0.255636	0.220304	0	2328.78	2076.18	-0.159895	0.0502279	2.83696	2.6107	0	-0.1849	0.0614679	-3.00808	2.58021	2.26608	2.33561
rs1250611413_Ref_G	rs1250611413_center_fwd_NA	rs1250611413	10	44603239	G	T	ref	center	fwd	NA	940.931	806.173	-0.220741	0.0758388	2.44289	2.23833	0	704.4	789.66	0.164938	0.099958	1.00468	0.897873	0	0.38415	0.113271	3.39143	3.15783	2.79899	2.8727
rs12506904_Ref_A	rs12506904_center_fwd_NA	rs12506904	4	77947026	A	G	ref	center	fwd	NA	1953.16	1783.43	-0.12629	0.0542717	1.69973	1.54183	0	2140.9	1998.75	-0.103724	0.0509939	1.3773	1.24253	0	0.0190289	0.0682347	0.278875	0.107716	0.0818114	NA
rs12509281_Ref_A	rs12509281_center_fwd_NA	rs12509281	4	78480280	A	G	ref	center	fwd	NA	2652.02	2568.46	-0.0472672	0.0572449	0.388304	0.337781	0	2759.68	2865.96	0.0605764	0.0384207	0.93978	0.838399	0	0.105709	0.0613025	1.72439	1.07244	0.899874	NA
rs12509972_Ref_C	rs12509972_center_fwd_NA	rs12509972	4	175027656	C	A	ref	center	fwd	NA	4078.46	5376.46	0.39757	0.0414953	21.0176	20.1364	17.165	4337.54	5528.42	0.349329	0.040508	17.1883	16.4083	13.3357	-0.0499865	0.0537154	-0.930581	0.453371	0.368296	0.395002
rs12512210_Ref_A	rs12512210_center_fwd_NA	rs12512210	4	175021204	A	G	ref	center	fwd	NA	5602.69	5411.68	-0.0531268	0.0323725	0.996648	0.890385	0	4038.51	4270.15	0.0830199	0.0333239	1.89525	1.72426	0	0.134396	0.0461481	2.91228	2.44515	2.14349	NA
rs1251251518_Ref_G	rs1251251518_center_fwd_NA	rs1251251518	4	77869580	G	A	ref	center	fwd	NA	2499.32	3307.51	0.40822	0.0458045	18.3008	17.4927	14.4482	1532.89	1977.81	0.36495	0.0514603	11.8784	11.2713	8.02583	-0.0458505	0.0653625	-0.701481	0.31605	0.2519	0.27396
rs12513233_Ref_G	rs12513233_center_fwd_NA	rs12513233	4	175018475	G	A	ref	center	fwd	NA	1522.32	1321.12	-0.202322	0.0676364	2.5563	2.34554	0	1590.75	1566.92	-0.0151309	0.059757	0.0968511	0.0817343	0	0.185075	0.081469	2.27172	1.63633	1.40386	1.46127
rs12515429_Ref_C	rs12515429_center_fwd_NA	rs12515429	5	104569574	C	T	ref	center	fwd	NA	3956.31	4248.25	0.106794	0.0370453	2.40433	2.20226	0	3051.52	2756.46	-0.150834	0.0449722	3.09872	2.85831	0	-0.259821	0.0566078	-4.58984	5.35302	4.85312	4.93117
rs12519770_Ref_A	rs12519770_center_fwd_NA	rs12519770	5	90777460	A	G	ref	center	fwd	NA	4246.11	4264.32	-0.0007662	0.0338892	0.0079054	0.00643819	0	4061.35	4252.95	0.0590823	0.039305	0.876821	0.780612	0	0.0565392	0.0556286	1.01637	0.509404	0.414652	NA
rs12521665_Ref_T	rs12521665_center_fwd_NA	rs12521665	5	23342830	T	A	ref	center	fwd	NA	858.998	1212.44	0.494946	0.0825679	8.68989	8.19928	4.83729	761.201	925.228	0.268361	0.0772518	3.28985	3.03886	0	-0.227767	0.110365	-2.06375	1.40847	1.19878	1.25298
rs12590189_Ref_A	rs12590189_center_fwd_NA	rs12590189	14	96346483	A	C	ref	center	fwd	NA	2145.68	2324	0.107276	0.0437828	1.84532	1.67771	0	2550.52	3649.4	0.519129	0.0407534	36.4411	35.2338	32.5885	0.410587	0.0579046	7.09075	11.8749	11.0295	11.1075
rs12591598_Ref_C	rs12591598_center_fwd_NA	rs12591598	15	73854631	C	A	ref	center	fwd	NA	3031.26	3049.94	0.00543184	0.0498506	0.0394188	0.0328389	0	2850.82	3372.51	0.242751	0.0370045	10.2693	9.7184	6.41668	0.237018	0.0566381	4.18478	4.54449	4.09701	4.17506
rs12597798_Ref_G	rs12597798_center_fwd_NA	rs12597798	16	48960355	G	A	ref	center	fwd	NA	4170.09	3789.37	-0.128239	0.0339822	3.79361	3.51511	0	3478.9	3481.43	0.00026171	0.0412414	0.00220447	0.00186867	0	0.129218	0.0564058	2.29086	1.65814	1.42243	1.47997
rs12612849_Ref_C	rs12612849_center_fwd_NA	rs12612849	2	239521008	C	T	ref	center	fwd	NA	4234.81	4528.12	0.0986548	0.0425677	1.68886	1.53188	0	4467.31	3993.47	-0.161684	0.0422629	3.88466	3.60086	0.0320532	-0.262716	0.0520172	-5.05056	6.35603	5.79651	5.87456
rs12632827_Ref_C	rs12632827_center_fwd_NA	rs12632827	3	13298558	C	T	ref	center	fwd	NA	3321.05	5652.63	0.765466	0.0385228	87.1349	85.0715	83.2823	3685.44	5157.14	0.484459	0.0367423	38.9724	37.7112	35.1198	-0.282776	0.0519636	-5.44181	7.27785	6.67326	6.75131
rs12640653_Ref_C	rs12640653_center_fwd_NA	rs12640653	4	111861317	C	T	ref	center	fwd	NA	3964.04	4188.19	0.0783653	0.0330074	1.75478	1.59309	0	4719.27	4761.22	0.015445	0.0316246	0.203927	0.174872	0	-0.0644401	0.0432292	-1.49066	0.866301	0.719638	NA
rs12642898_Ref_G	rs12642898_center_fwd_NA	rs12642898	4	175028308	G	A	ref	center	fwd	NA	4569	7336.06	0.683483	0.0516003	39.3208	38.0546	35.4682	4121.95	6494.78	0.655113	0.0547703	32.2456	31.1205	28.393	-0.03063	0.0624608	-0.490388	0.204913	0.158631	0.174492
rs1264297_Ref_A	rs1264297_center_fwd_NA	rs1264297	6	30917029	A	C	ref	center	fwd	NA	6769.59	5641.45	-0.264129	0.0386646	11.0749	10.4954	7.22231	3950.66	4204.89	0.0875944	0.0335652	2.04274	1.86209	0	0.350481	0.0463972	7.55392	13.3743	12.448	12.526
rs1264302_Ref_C	rs1264302_center_fwd_NA	rs1264302	6	30914857	C	T	ref	center	fwd	NA	2818.69	2660.95	-0.0829837	0.0424161	1.29743	1.16878	0	3705.31	3677.59	-0.0118588	0.0417792	0.109842	0.0932331	0	0.0689545	0.0532123	1.29584	0.709895	0.586213	NA
rs1264303_Ref_A	rs1264303_center_fwd_NA	rs1264303	6	30914736	A	G	ref	center	fwd	NA	5725.07	6407.93	0.164798	0.0404988	4.3263	4.02319	0.473695	6240.35	8719.13	0.48452	0.0362878	39.9391	38.6603	36.0865	0.317668	0.0514073	6.17944	9.19158	8.49261	8.57066
rs1264305_Ref_C	rs1264305_center_fwd_NA	rs1264305	6	30914500	C	T	ref	center	fwd	NA	4840.66	4577.97	-0.0826134	0.0365801	1.62125	1.4695	0	4706.08	4077.76	-0.204173	0.0383116	7.00611	6.58338	3.15351	-0.122287	0.0475101	-2.57391	1.99759	1.73191	1.7931
rs1264307_Ref_G	rs1264307_center_fwd_NA	rs1264307	6	30912980	G	A	ref	center	fwd	NA	8180.76	8176.61	-0.0005022	0.0372786	0.00469349	0.00389936	0	8678.48	10073.3	0.214791	0.0461819	5.481	5.12403	1.6284	0.213661	0.0582656	3.66701	3.61012	3.22075	3.29687
rs1264317_Ref_C	rs1264317_center_fwd_NA	rs1264317	6	30896923	C	T	ref	center	fwd	NA	5872.8	5304.88	-0.148395	0.0313877	5.64406	5.27875	1.79145	5519.08	5730.26	0.0496896	0.0305194	0.985074	0.880055	0	0.196334	0.0434751	4.51602	5.20057	4.70905	4.7871
rs1264320_Ref_C	rs1264320_center_fwd_NA	rs1264320	6	30893223	C	T	ref	center	fwd	NA	225.224	177.193	-0.345428	0.208349	1.01175	0.904624	0	527.366	364.299	-0.524242	0.109407	5.78151	5.40985	1.9289	-0.182784	0.194415	-0.940174	0.45951	0.372592	0.39973
rs1264327_Ref_G	rs1264327_center_fwd_NA	rs1264327	6	30882805	G	A	ref	center	fwd	NA	4245.64	5081.89	0.256641	0.0327635	14.3226	13.6298	10.47	3887.08	4472.92	0.205265	0.0383308	7.06798	6.6425	3.21538	-0.0525413	0.0469682	-1.11866	0.57957	0.475121	0.507636
rs1264329_Ref_G	rs1264329_center_fwd_NA	rs1264329	6	30882336	G	A	ref	center	fwd	NA	4409.77	5378.17	0.280275	0.0330679	16.6316	15.865	12.779	4691.83	4452.65	-0.0732103	0.038844	1.22572	1.10275	0	-0.355016	0.0485206	-7.31682	12.5953	11.7046	11.7827
rs1264332_Ref_G	rs1264332_center_fwd_NA	rs1264332	6	30877786	G	C	ref	center	fwd	NA	3876.3	3722.72	-0.0586786	0.0342312	1.06301	0.951691	0	4934.55	4534.58	-0.120576	0.031981	3.78755	3.50952	0	-0.0635793	0.043658	-1.4563	0.837708	0.693903	0.73635
rs1264333_Ref_T	rs1264333_center_fwd_NA	rs1264333	6	30876537	T	C	ref	center	fwd	NA	2814.3	3267.24	0.218952	0.0423075	6.64283	6.23425	2.79023	4144.17	4254.37	0.0359721	0.0404199	0.427724	0.372929	0	-0.185565	0.0544468	-3.40818	3.18444	2.82307	2.89713
rs1264334_Ref_G	rs1264334_center_fwd_NA	rs1264334	6	30876483	G	A	ref	center	fwd	NA	5108.29	4758.18	-0.102968	0.0313715	2.9872	2.75311	0	5569.31	5255.35	-0.0832407	0.0335838	1.87976	1.70998	0	0.0179945	0.0468726	0.383902	0.154251	0.117662	0.130246
rs1264345_Ref_G	rs1264345_center_fwd_NA	rs1264345	6	30832291	G	A	ref	center	fwd	NA	4746.63	18826.6	1.98789	0.163803	33.1664	32.0243	29.3138	4459.37	17448	1.96862	0.142451	42.7121	41.3784	38.8595	-0.0203999	0.215656	-0.0945949	0.0340289	0.0264095	0.0292949
rs12643573_Ref_A	rs12643573_center_fwd_NA	rs12643573	4	78439284	A	T	ref	center	fwd	NA	2559.27	2951.77	0.205895	0.0562336	3.60066	3.33247	0	2577.48	2609.9	0.018099	0.0473149	0.153617	0.130846	0	-0.189659	0.0649053	-2.92208	2.4588	2.15524	2.22272
rs1264801078_Ref_G	rs1264801078_center_fwd_NA	rs1264801078	18	2944586	G	A	ref	center	fwd	NA	3973.38	4839.58	0.284713	0.0524658	7.24092	6.80897	3.38832	5126.93	7211.28	0.495411	0.0438906	28.8198	27.7642	24.9672	0.209479	0.0601749	3.48117	3.3017	2.93414	3.00888
rs1264926021_Ref_A	rs1264926021_center_fwd_NA	rs1264926021	7	93564755	A	T	ref	center	fwd	NA	3268.97	4737.24	0.5359	0.0500605	26.016	25.0162	22.1634	1987.29	1871.27	-0.0846526	0.0465947	1.15958	1.04138	0	-0.62282	0.062083	-10.0321	22.9579	21.6473	21.7253
rs12649822_Ref_A	rs12649822_center_fwd_NA	rs12649822	4	78457206	A	G	ref	center	fwd	NA	4270.14	4861.74	0.191638	0.0337003	7.88726	7.42956	4.03465	3492.07	3644.68	0.0627684	0.0386949	0.979746	0.875233	0	-0.130106	0.0519514	-2.50437	1.91126	1.65077	1.71156
rs12651813_Ref_G	rs12651813_center_fwd_NA	rs12651813	5	104579575	G	A	ref	center	fwd	NA	1783.12	1610.1	-0.136726	0.0542687	1.9298	1.75649	0	1160.05	1190.07	0.0425998	0.062644	0.304093	0.262493	0	0.178603	0.0814904	2.19171	1.54667	1.32377	NA
rs12657123_Ref_T	rs12657123_center_fwd_NA	rs12657123	5	104571571	T	A	ref	center	fwd	NA	3328.46	4102.32	0.302443	0.0374783	15.1524	14.4326	11.2998	4188.26	3453.5	-0.273228	0.0410651	10.5434	9.98301	6.69083	-0.576819	0.0546125	-10.562	25.3499	23.9659	24.0439
rs12657531_Ref_A	rs12657531_center_fwd_NA	rs12657531	5	104568136	A	G	ref	center	fwd	NA	4449.25	9618.1	1.1122	0.172977	9.89335	9.35635	6.04075	5530.1	11211.7	1.01912	0.105108	21.5033	20.6056	17.6507	-0.094255	0.173073	-0.544597	0.23208	0.181399	0.198618
rs12658007_Ref_A	rs12658007_center_fwd_NA	rs12658007	5	104568333	A	G	ref	center	fwd	NA	5198.46	5715.07	0.138123	0.0337074	4.37957	4.07431	0.526967	5639.76	5767.35	0.0333634	0.0305297	0.5615	0.492274	0	-0.106853	0.0434378	-2.4599	1.85706	1.60085	1.66123
rs12658451_Ref_T	rs12658451_center_fwd_NA	rs12658451	5	104568336	T	C	ref	center	fwd	NA	4949.57	6444.5	0.379234	0.0446693	16.6841	15.9159	12.8315	4400.15	4519.38	0.0308267	0.0320882	0.472745	0.412515	0	-0.347793	0.0523646	-6.64177	10.5087	9.73899	9.81704
rs12661295_Ref_A	rs12661295_center_fwd_NA	rs12661295	6	76835023	A	G	ref	center	fwd	NA	2752.85	2905.57	0.0746376	0.0467174	0.95812	0.855466	0	3774.09	3677.18	-0.0358066	0.0343823	0.526251	0.460461	0	-0.111095	0.0531624	-2.08974	1.43603	1.22377	NA
rs12666259_Ref_A	rs12666259_center_fwd_NA	rs12666259	7	27219669	A	G	ref	center	fwd	NA	4914.65	4289.5	-0.195073	0.0324918	8.71485	8.22292	4.86224	5592	5629.61	0.00919152	0.0387318	0.0902223	0.0763001	0	0.20229	0.0465378	4.34679	4.85967	4.38865	4.4667
rs12678719_Ref_C	rs12678719_center_fwd_NA	rs12678719	8	105503826	C	G	ref	center	fwd	NA	4060.87	5146.93	0.344375	0.0383395	18.5763	17.76	14.7236	4868.6	6145.99	0.335157	0.0312813	26.0593	25.0574	22.2067	-0.0117738	0.0462166	-0.254753	0.0974999	0.0745604	0.0831401
rs12680351_Ref_T	rs12680351_center_fwd_NA	rs12680351	8	105502951	T	G	ref	center	fwd	NA	3518.07	2812.56	-0.326697	0.0383497	16.7929	16.0217	12.9403	2830.79	2824.25	-0.0060484	0.0435717	0.0508069	0.0425197	0	0.318127	0.0534807	5.94845	8.56753	7.89747	7.97552
rs12681240_Ref_T	rs12681240_center_fwd_NA	rs12681240	8	59160114	T	A	ref	center	fwd	NA	975.115	757.692	-0.344383	0.0714877	5.83726	5.46338	1.98466	910.332	855.087	-0.0991432	0.0723009	0.7688	0.681396	0	0.245266	0.105211	2.33119	1.70458	1.46479	1.5227
rs12697443_Ref_G	rs12697443_center_fwd_NA	rs12697443	5	43110659	G	C	ref	center	fwd	NA	2128.46	2256.17	0.0806683	0.0435553	1.19373	1.073	0	2017.27	2415.96	0.255419	0.0487254	6.79904	6.3844	2.94644	0.172101	0.063557	2.70783	2.16925	1.89001	1.95345
rs12697623_Ref_G	rs12697623_center_fwd_NA	rs12697623	5	23349845	G	A	ref	center	fwd	NA	3083.93	4076.62	0.39689	0.0426009	19.9199	19.0659	16.0673	2926.04	3527.57	0.268572	0.0396293	10.9115	10.3385	7.05892	-0.129941	0.0601633	-2.15981	1.51162	1.29108	1.34687
rs12711961_Ref_A	rs12711961_center_fwd_NA	rs12711961	2	4902776	A	G	ref	center	fwd	NA	5316.96	5268.91	-0.0115328	0.0313019	0.147186	0.125218	0	6274.17	5599.48	-0.164813	0.032002	6.58443	6.17881	2.73183	-0.15535	0.0418259	-3.7142	3.6907	3.29589	3.37238
rs12725053_Ref_G	rs12725053_center_fwd_NA	rs12725053	1	118397223	G	A	ref	center	fwd	NA	3215.68	2854.39	-0.170866	0.0428399	4.17718	3.88022	0.324581	3162.63	2660.4	-0.253196	0.0424781	8.59986	8.1146	4.74726	-0.085118	0.0544012	-1.56463	0.929339	0.773762	0.819333
rs12728254_Ref_A	rs12728254_center_fwd_NA	rs12728254	1	150847004	A	T	ref	center	fwd	NA	5067.01	5305.53	0.0638336	0.0347292	1.18008	1.06056	0	3555.81	3382.51	-0.0676772	0.0384107	1.10746	0.992694	0	-0.133158	0.0515389	-2.58364	2.00982	1.74327	NA
rs1273810264_Ref_T	rs1273810264_center_fwd_NA	rs1273810264	10	114295016	T	A	ref	center	fwd	NA	4143.66	3854.25	-0.105792	0.0368913	2.38351	2.1826	0	1329.05	1147.14	-0.204198	0.0618794	3.01454	2.77926	0	-0.0959726	0.0620058	-1.5478	0.914816	0.761932	0.806263
rs12776846_Ref_C	rs12776846_center_fwd_NA	rs12776846	10	9074290	C	T	ref	center	fwd	NA	3996.38	4323.89	0.118545	0.0359498	3.01082	2.77584	0	1736.32	1868.53	0.108641	0.0582975	1.20493	1.08339	0	-0.0095138	0.0597884	-0.159125	0.0587022	0.044792	0.0499513
rs1278765196_Ref_C	rs1278765196_center_fwd_NA	rs1278765196	4	77848902	C	T	ref	center	fwd	NA	3031.52	3547.72	0.224087	0.0466048	5.81739	5.44422	1.96479	2703.54	2930.81	0.120131	0.0395579	2.62147	2.4076	0	-0.105086	0.0565756	-1.85744	1.19895	1.01162	1.06243
rs12881888_Ref_G	rs12881888_center_fwd_NA	rs12881888	14	96339414	G	A	ref	center	fwd	NA	1810.68	1766.13	-0.0345536	0.0575481	0.261045	0.225017	0	2191.93	2434.62	0.153555	0.0515367	2.53956	2.32949	0	0.18627	0.0702214	2.65261	2.09761	1.82313	1.88581
rs12882534_Ref_A	rs12882534_center_fwd_NA	rs12882534	14	96348458	A	G	ref	center	fwd	NA	2601.65	175453	6.07546	0.335026	72.7675	70.9109	68.9149	2542.33	173713	6.09435	0.329464	75.6673	73.7669	71.8147	0.017843	0.260455	0.0685071	0.0243927	0.0198053	0.0219374
rs12882717_Ref_A	rs12882717_center_fwd_NA	rs12882717	14	96318510	A	G	ref	center	fwd	NA	3096.03	2969.79	-0.0626382	0.0393083	0.9545	0.852078	0	3684.32	3080.49	-0.255115	0.0408829	9.35933	8.84195	5.50673	-0.19318	0.0514865	-3.75206	3.75599	3.3545	3.43136
rs12884100_Ref_A	rs12884100_center_fwd_NA	rs12884100	14	88062947	A	C	ref	center	fwd	NA	3110.69	2582.1	-0.272778	0.0494504	7.46043	7.0188	3.60782	2689.51	2402.82	-0.164971	0.0418452	4.09331	3.8005	0.240707	0.1077	0.0586607	1.83598	1.17809	0.992454	1.04312
rs12893091_Ref_G	rs12893091_center_fwd_NA	rs12893091	14	96276266	G	A	ref	center	fwd	NA	3900.96	4992.76	0.356368	0.0432569	15.7581	15.0173	11.9055	2905.02	3810.74	0.394789	0.0385983	23.8287	22.8806	19.9761	0.0364695	0.0535389	0.681178	0.304729	0.242581	0.263468
rs12894714_Ref_G	rs12894714_center_fwd_NA	rs12894714	14	96279662	G	A	ref	center	fwd	NA	6341.72	7483.08	0.239435	0.0393323	8.94048	8.44023	5.08787	4481.65	4984.52	0.155919	0.0316977	6.06045	5.67701	2.20785	-0.0858717	0.0451812	-1.90061	1.24144	1.04875	1.1
rs12894850_Ref_G	rs12894850_center_fwd_NA	rs12894850	14	40875692	G	A	ref	center	fwd	NA	5156.96	4763.44	-0.116047	0.0311071	3.71886	3.44481	0	6468.24	6034.2	-0.101886	0.0310185	2.99101	2.75687	0	0.0121701	0.0412378	0.29512	0.114694	0.086897	0.0969924
rs12897559_Ref_A	rs12897559_center_fwd_NA	rs12897559	14	96394814	A	G	ref	center	fwd	NA	3034.09	6195.5	1.02974	0.223137	5.40517	5.05097	1.55257	4000.41	8812.87	1.13966	0.168439	10.8782	10.3064	7.0256	0.10927	0.197648	0.552851	0.236298	0.184555	0.202022
rs12909503_Ref_T	rs12909503_center_fwd_NA	rs12909503	15	68697082	T	C	ref	center	fwd	NA	3488.46	3106.76	-0.17708	0.0394961	5.13408	4.79264	1.28148	4155.12	4037.01	-0.0430594	0.0374244	0.602218	0.529001	0	0.132412	0.0541266	2.44634	1.84069	1.58617	1.64633
rs12910996_Ref_C	rs12910996_center_fwd_NA	rs12910996	15	68693893	C	T	ref	center	fwd	NA	6001.12	7332.98	0.285881	0.0376523	13.5038	12.838	9.65125	5335.49	6260.42	0.229435	0.0326455	11.679	11.0796	7.82642	-0.0572453	0.0468655	-1.22148	0.653835	0.539057	0.574729
rs12911382_Ref_G	rs12911382_center_fwd_NA	rs12911382	15	68721577	G	A	ref	center	fwd	NA	4572.17	5210.85	0.186709	0.0422708	4.9996	4.66384	1.14699	3715.31	3428.1	-0.117929	0.0509339	1.68624	1.5294	0	-0.30708	0.0569621	-5.39095	7.15437	6.55712	6.63517
rs12911725_Ref_G	rs12911725_center_fwd_NA	rs12911725	15	68642342	G	A	ref	center	fwd	NA	5759.87	6002.67	0.0600116	0.0307584	1.29201	1.1636	0	5986.33	6954.81	0.216544	0.0439982	6.06646	5.68286	2.21385	0.155	0.0485264	3.19413	2.85309	2.51633	2.58784
rs12915435_Ref_C	rs12915435_center_fwd_NA	rs12915435	15	68715888	C	G	ref	center	fwd	NA	2682.36	2804.43	0.0683877	0.0454096	0.87922	0.782859	0	3543.15	3670.79	0.0556642	0.0348199	0.958994	0.856185	0	-0.0162994	0.0548016	-0.297427	0.115691	0.0874109	NA
rs12915581_Ref_C	rs12915581_center_fwd_NA	rs12915581	15	68715976	C	T	ref	center	fwd	NA	4019.18	3271.19	-0.293595	0.04434	10.4489	9.89267	6.59633	5466.98	4696.29	-0.217238	0.0477104	5.27719	4.92922	1.42458	0.0750289	0.0559858	1.34014	0.744247	0.615092	0.654157
rs12917469_Ref_A	rs12917469_center_fwd_NA	rs12917469	15	68704010	A	G	ref	center	fwd	NA	5094.19	8245.2	0.695383	0.0712341	21.7852	20.8814	17.9326	5432.77	9879.58	0.863919	0.0664563	37.9112	36.6733	34.0586	0.167299	0.0783556	2.13512	1.48477	1.26658	1.32194
rs12943302_Ref_G	rs12943302_center_fwd_NA	rs12943302	17	74800527	G	C	ref	center	fwd	NA	3410.43	3887.79	0.18586	0.0395381	5.58643	5.22373	1.73383	3192.77	4708.47	0.561687	0.0360533	53.9976	52.4377	50.145	0.374342	0.0518573	7.2187	12.2799	11.4072	11.4853
rs12943640_Ref_G	rs12943640_center_fwd_NA	rs12943640	17	11321217	G	A	ref	center	fwd	NA	4414.55	5254.04	0.251615	0.0352852	12.0012	11.3894	8.14862	5021.55	4621.06	-0.11984	0.0398341	2.58078	2.36902	0	-0.373193	0.04723	-7.90161	14.5602	13.5786	13.6567
rs12945409_Ref_C	rs12945409_center_fwd_NA	rs12945409	17	74800528	C	T	ref	center	fwd	NA	3114.63	4859.63	0.639488	0.058275	27.2909	26.2647	23.4383	3162.68	3334.13	0.0860833	0.0407043	1.4629	1.32226	0	-0.556625	0.0669482	-8.31426	16.0347	14.9969	15.0749
rs12974830_Ref_A	rs12974830_center_fwd_NA	rs12974830	19	14334821	A	G	ref	center	fwd	NA	2815.11	2228.65	-0.334111	0.0485587	11.2246	10.6393	7.37203	3882.15	4851.07	0.324037	0.041855	14.009	13.327	10.1564	0.655963	0.0552736	11.8676	31.7583	30.1235	30.2016
rs1297604781_Ref_C	rs1297604781_center_fwd_NA	rs1297604781	6	158305704	C	A	ref	center	fwd	NA	1324.3	1275.1	-0.0395795	0.0579651	0.305638	0.263836	0	2990.88	3974.08	0.412752	0.0358302	29.9787	28.8984	26.1261	0.445972	0.0648092	6.8813	11.2269	10.4245	10.5025
rs12992981_Ref_T	rs12992981_center_fwd_NA	rs12992981	2	175851629	T	C	ref	center	fwd	NA	6174.29	6443.88	0.0573611	0.0310908	1.18679	1.06671	0	2576.03	3231.38	0.332102	0.0411591	15.1486	14.4289	11.296	0.273951	0.0478873	5.72076	7.97448	7.33635	7.4144
rs1300008130_Ref_T	rs1300008130_center_fwd_NA	rs1300008130	16	86464524	T	C	ref	center	fwd	NA	3547.41	3577.81	0.0131745	0.0410941	0.125798	0.106894	0	4279.73	4323.6	0.0137637	0.0377313	0.145528	0.123881	0	-0.0014067	0.0525657	-0.0267614	0.00937259	0.00688535	NA
rs13011467_Ref_G	rs13011467_center_fwd_NA	rs13011467	2	175845357	G	A	ref	center	fwd	NA	4667.46	4858.31	0.0540867	0.0376687	0.820896	0.729007	0	4296.11	4711	0.130798	0.0341402	3.89444	3.61011	0.0418389	0.0757857	0.0476552	1.59029	0.95168	0.791804	0.83753
rs1301181855_Ref_A	rs1301181855_center_fwd_NA	rs1301181855	8	57372783	A	T	ref	center	fwd	NA	979.632	1120.59	0.187591	0.0734781	1.97146	1.79582	0	718.661	1076.07	0.589388	0.0680226	17.3438	16.561	13.4912	0.400895	0.0954402	4.20048	4.57456	4.12399	4.20204
rs13041792_Ref_G	rs13041792_center_fwd_NA	rs13041792	20	34957252	G	A	ref	center	fwd	NA	5209.84	4485.19	-0.212806	0.041065	6.65891	6.24978	2.8063	5813.95	6362.93	0.129864	0.0411938	2.79082	2.56703	0	0.340344	0.0519858	6.54687	10.231	9.48164	9.55969
rs13060178_Ref_T	rs13060178_center_fwd_NA	rs13060178	3	159332710	T	C	ref	center	fwd	NA	3415.4	3054.76	-0.163352	0.0375423	4.86831	4.53962	1.0157	4197.75	3663.25	-0.194559	0.0365836	6.97964	6.55821	3.12704	-0.0323373	0.0481181	-0.67204	0.299679	0.238438	0.259246
rs13063797_Ref_G	rs13063797_center_fwd_NA	rs13063797	3	159236656	G	A	ref	center	fwd	NA	2838.12	3371.4	0.246419	0.0378955	10.1027	9.55824	6.25005	2802.23	2739.65	-0.0311351	0.0424551	0.334105	0.288862	0	-0.279073	0.052679	-5.29761	6.93059	6.34094	6.41899
rs13065596_Ref_G	rs13065596_center_fwd_NA	rs13065596	3	159284689	G	T	ref	center	fwd	NA	3703.79	4372.57	0.241809	0.0429721	7.73697	7.28544	3.88436	3931.25	5170.71	0.397707	0.0405133	22.0204	21.111	18.1678	0.153888	0.0515943	2.98267	2.54402	2.23456	2.30288
rs13067585_Ref_T	rs13067585_center_fwd_NA	rs13067585	3	159233507	T	C	ref	center	fwd	NA	3691.49	3791.67	0.0417368	0.0399101	0.529196	0.463037	0	3438.89	3614.92	0.07597	0.0385129	1.31387	1.18386	0	0.032146	0.0521168	0.616808	0.269734	0.21246	NA
rs1306799827_Ref_A	rs1306799827_center_fwd_NA	rs1306799827	6	11935527	A	G	ref	center	fwd	NA	4762.75	3331.69	-0.517044	0.0396946	38.0576	36.815	34.205	4594.39	4255.5	-0.113541	0.0331222	3.21595	2.96956	0	0.402268	0.0476994	8.43339	16.4739	15.4292	15.5073
rs13075790_Ref_C	rs13075790_center_fwd_NA	rs13075790	3	159289379	C	T	ref	center	fwd	NA	1830.51	1726.79	-0.079749	0.0508045	0.933749	0.832869	0	1784.01	2135.36	0.263245	0.0562185	5.5477	5.18682	1.69509	0.342064	0.0706404	4.84233	5.8917	5.36088	5.43893
rs13077258_Ref_G	rs13077258_center_fwd_NA	rs13077258	3	159314114	G	C	ref	center	fwd	NA	3287.91	3418.91	0.0538089	0.0407129	0.729835	0.645312	0	3826.89	4461.81	0.212686	0.0325416	10.1989	9.65092	6.34628	0.158756	0.0517623	3.06702	2.66514	2.34546	2.41522
rs13078786_Ref_G	rs13078786_center_fwd_NA	rs13078786	3	159402797	G	A	ref	center	fwd	NA	3395.44	3276.93	-0.0538224	0.0431934	0.67216	0.593089	0	5237.12	4558.74	-0.19868	0.0452991	4.9375	4.60522	1.08489	-0.145442	0.053881	-2.69932	2.15813	1.87949	1.94264
rs13080892_Ref_T	rs13080892_center_fwd_NA	rs13080892	3	159228930	T	A	ref	center	fwd	NA	3532.77	3322.72	-0.095398	0.038376	1.88863	1.71826	0	3813.75	3334.21	-0.191904	0.0403638	5.70097	5.33317	1.84836	-0.097868	0.053278	-1.83693	1.17901	0.993133	1.04378
rs13082502_Ref_G	rs13082502_center_fwd_NA	rs13082502	3	159232846	G	A	ref	center	fwd	NA	3460.55	4765.7	0.461262	0.0392279	31.195	30.0886	27.3424	4398.84	4397.15	-0.0035992	0.0375352	0.034512	0.0286131	0	-0.467024	0.0510023	-9.15692	19.2725	18.1326	18.2107
rs13083138_Ref_A	rs13083138_center_fwd_NA	rs13083138	3	159250347	A	G	ref	center	fwd	NA	2205.22	2529.88	0.202222	0.0468291	4.80346	4.47859	0.950854	4117.97	4600.04	0.157429	0.0360667	4.89564	4.56552	1.04304	-0.0478694	0.0534976	-0.894797	0.430748	0.347583	0.374099
rs13083244_Ref_C	rs13083244_center_fwd_NA	rs13083244	3	159280362	C	A	ref	center	fwd	NA	3898.21	3534.41	-0.142304	0.037449	3.83945	3.55806	0	4108.92	4223.56	0.0393285	0.038742	0.508582	0.444726	0	0.179932	0.0485387	3.70698	3.67831	3.28506	3.36116
rs13083887_Ref_T	rs13083887_center_fwd_NA	rs13083887	3	159241458	T	G	ref	center	fwd	NA	3666.78	3368.33	-0.119892	0.0381528	2.77583	2.55285	0	3443.86	2792.14	-0.300269	0.0380194	14.5468	13.8481	10.6942	-0.18253	0.0495661	-3.68256	3.63658	3.24489	3.32099
rs13085824_Ref_T	rs13085824_center_fwd_NA	rs13085824	3	159236644	T	A	ref	center	fwd	NA	5423.49	6389.79	0.234778	0.041177	7.92577	7.46579	4.07317	4963	5888.04	0.248459	0.0472695	6.83256	6.41649	2.97996	0.01293	0.0554928	0.233004	0.0884383	0.067485	0.075245
rs1308795362_Ref_T	rs1308795362_center_fwd_NA	rs1308795362	4	77902385	T	A	ref	center	fwd	NA	2011.89	1875.79	-0.0991087	0.0472564	1.44405	1.30488	0	1365.72	1234.97	-0.134137	0.0586348	1.65449	1.49993	0	-0.0346763	0.0724378	-0.478705	0.199181	0.154297	NA
rs13088547_Ref_C	rs13088547_center_fwd_NA	rs13088547	3	159233972	C	T	ref	center	fwd	NA	5279.88	4447.92	-0.249031	0.0363894	11.1119	10.531	7.2593	4136.55	4298.68	0.0613243	0.0336422	1.1654	1.04665	0	0.309033	0.0465427	6.63978	10.5029	9.73497	9.81302
rs13094534_Ref_G	rs13094534_center_fwd_NA	rs13094534	3	159227496	G	A	ref	center	fwd	NA	4049.9	4620.73	0.192327	0.0328834	8.30516	7.83187	4.45256	4085.68	3999.18	-0.0303908	0.034209	0.426742	0.37205	0	-0.224763	0.0445325	-5.04716	6.34832	5.78937	5.86742
rs13095658_Ref_A	rs13095658_center_fwd_NA	rs13095658	3	159222380	A	G	ref	center	fwd	NA	2516.83	2662.54	0.0766837	0.0410246	1.21047	1.08861	0	2298.7	2172.14	-0.074811	0.0450827	1.01308	0.905649	0	-0.153337	0.0609743	-2.51479	1.92407	1.663	NA
rs13102150_Ref_C	rs13102150_center_fwd_NA	rs13102150	4	142548980	C	A	ref	center	fwd	NA	4747.9	5240.35	0.144859	0.0324527	5.09393	4.75474	1.24133	2368.26	2005.44	-0.240856	0.0624437	3.94042	3.65444	0.0878149	-0.388104	0.0566206	-6.85446	11.1452	10.3458	10.4238
rs13107432_Ref_A	rs13107432_center_fwd_NA	rs13107432	4	142523591	A	G	ref	center	fwd	NA	3448.18	3104.53	-0.152869	0.0368307	4.47933	4.16973	0.626723	3609.78	3414.5	-0.0820056	0.0394114	1.42648	1.28823	0	0.0686666	0.0508523	1.35031	0.752235	0.621636	0.660985
rs13111807_Ref_T	rs13111807_center_fwd_NA	rs13111807	4	77983154	T	A	ref	center	fwd	NA	60.0208	55.8062	-0.0927623	0.279018	0.131037	0.111406	0	313.976	601.618	0.955859	0.108485	17.9064	17.1109	14.0538	1.02758	0.254673	4.03492	4.26263	3.82734	3.90496
rs1311628805_Ref_C	rs1311628805_center_fwd_NA	rs1311628805	7	27231882	C	A	ref	center	fwd	NA	1939.47	1794.31	-0.108536	0.0516152	1.44996	1.31027	0	2145.25	2350.09	0.131709	0.0428755	2.67222	2.45517	0	0.237388	0.0626899	3.7867	3.81627	3.4112	3.48804
rs13116497_Ref_C	rs13116497_center_fwd_NA	rs13116497	4	175020519	C	A	ref	center	fwd	NA	4139.57	4881.05	0.235768	0.0365672	9.9443	9.4053	6.0917	3715.15	3261.81	-0.186548	0.0545675	3.20115	2.95514	0	-0.423453	0.0560393	-7.55637	13.3825	12.4535	12.5315
rs13129350_Ref_G	rs13129350_center_fwd_NA	rs13129350	4	175022333	G	T	ref	center	fwd	NA	2953.94	2639.58	-0.160805	0.0421414	3.86737	3.58445	0.0147647	2307.62	1860.69	-0.300907	0.0500576	8.73485	8.24217	4.88225	-0.13976	0.0617798	-2.26222	1.62555	1.39523	1.45275
rs13130317_Ref_A	rs13130317_center_fwd_NA	rs13130317	4	175019278	A	G	ref	center	fwd	NA	2838.04	4081.27	0.526205	0.0357634	48.2775	46.8318	44.4249	2286.11	2727.31	0.249026	0.0423009	8.40537	7.92825	4.55277	-0.279917	0.0535474	-5.22746	6.76485	6.18428	6.26233
rs13131841_Ref_C	rs13131841_center_fwd_NA	rs13131841	4	175022777	C	A	ref	center	fwd	NA	4442.65	4449.74	-0.0020823	0.0322529	0.0229517	0.0193666	0	3926.27	3675.2	-0.0979639	0.0391282	1.9104	1.73827	0	-0.0987158	0.0473023	-2.08691	1.43302	1.22128	NA
rs13135042_Ref_A	rs13135042_center_fwd_NA	rs13135042	4	142526815	A	G	ref	center	fwd	NA	2645.55	2743.24	0.0533056	0.0452132	0.622684	0.547803	0	3246.43	3537.31	0.127602	0.0392855	2.93481	2.70375	0	0.0724252	0.0544764	1.32948	0.735913	0.60866	0.647212
rs13137003_Ref_C	rs13137003_center_fwd_NA	rs13137003	4	175028796	C	T	ref	center	fwd	NA	4325.16	4023.74	-0.105328	0.0374697	2.30639	2.11011	0	3430.22	3494.12	0.0227316	0.0380666	0.259318	0.223522	0	0.12593	0.0509083	2.47366	1.87374	1.61582	1.67672
rs13141617_Ref_T	rs13141617_center_fwd_NA	rs13141617	4	175019680	T	G	ref	center	fwd	NA	6628.79	15489.1	1.22426	0.10489	30.7509	29.6557	26.8983	5640.25	14240.7	1.33695	0.0896251	49.5932	48.1239	45.7406	0.111568	0.106182	1.05073	0.532565	0.435065	0.465053
rs13142243_Ref_T	rs13142243_center_fwd_NA	rs13142243	4	175019969	T	C	ref	center	fwd	NA	5066.66	5512.75	0.122553	0.0375043	2.96486	2.73187	0	8625.13	8835.05	0.0346678	0.0385274	0.433898	0.378583	0	-0.0896273	0.0499251	-1.79523	1.13896	0.956932	1.00732
rs13142935_Ref_A	rs13142935_center_fwd_NA	rs13142935	4	175020473	A	G	ref	center	fwd	NA	4172.97	4799.72	0.200134	0.0321599	9.31203	8.79736	5.45943	4494.51	4942.99	0.130352	0.0326318	4.18846	3.89132	0.335858	-0.0719145	0.0454944	-1.58073	0.943327	0.784837	0.830702
rs13150610_Ref_G	rs13150610_center_fwd_NA	rs13150610	4	175031167	G	T	ref	center	fwd	NA	2793.41	2644.08	-0.0775887	0.0432982	1.13585	1.01902	0	3231.68	4003	0.311111	0.0397191	14.3212	13.6287	10.4686	0.386827	0.0582106	6.6453	10.5191	9.74846	9.82651
rs13153908_Ref_T	rs13153908_center_fwd_NA	rs13153908	5	115601719	T	C	ref	center	fwd	NA	3662.15	3006.43	-0.282347	0.0382739	12.7908	12.153	8.93816	4766.98	4364.3	-0.124908	0.0319762	4.02815	3.73826	0.175545	0.155004	0.0457285	3.38966	3.15503	2.79655	2.87027
rs13164188_Ref_T	rs13164188_center_fwd_NA	rs13164188	5	104578822	T	C	ref	center	fwd	NA	3843.76	3759.27	-0.0393687	0.0369153	0.543307	0.475855	0	3311.6	2718.86	-0.288441	0.0408512	11.781	11.1766	7.92843	-0.251509	0.0538849	-4.66751	5.51589	5.00898	5.08703
rs1316476569_Ref_A	rs1316476569_center_fwd_NA	rs1316476569	5	104643096	A	G	ref	center	fwd	NA	791.524	797.495	0.00315351	0.0708105	0.0157075	0.013198	0	1498.29	1495.73	-0.0100481	0.0554658	0.0674027	0.0565888	0	-0.0135941	0.0912909	-0.14891	0.0547162	0.0435594	NA
rs13168169_Ref_A	rs13168169_center_fwd_NA	rs13168169	5	23336808	A	C	ref	center	fwd	NA	2669.92	2572.35	-0.0480645	0.0620213	0.358171	0.310994	0	2628.18	2793.85	0.0877051	0.0415984	1.45596	1.31586	0	0.130876	0.0682272	1.91824	1.259	1.06361	NA
rs13172611_Ref_C	rs13172611_center_fwd_NA	rs13172611	5	104577567	C	T	ref	center	fwd	NA	3520.45	2831.89	-0.316029	0.039579	14.8514	14.1408	10.9988	3176.8	2904.58	-0.12691	0.0382895	3.03712	2.80046	0	0.187764	0.0508883	3.68973	3.6488	3.25633	3.33243
rs13174020_Ref_C	rs13174020_center_fwd_NA	rs13174020	5	23350532	C	T	ref	center	fwd	NA	2099.27	2033.43	-0.0386502	0.05268	0.334283	0.288973	0	1526.96	2949.36	0.939892	0.0554059	63.8172	62.0985	59.9646	0.976687	0.0762669	12.8062	36.8198	34.9471	35.0251
rs1317721169_Ref_G	rs1317721169_center_fwd_NA	rs1317721169	12	121221154	G	A	ref	center	fwd	NA	5347.19	5835.28	0.126362	0.0361402	3.32651	3.07361	0	4397.62	4106.65	-0.0932677	0.0377837	1.86744	1.69843	0	-0.220901	0.049705	-4.44425	5.05453	4.56931	4.64736
rs13185904_Ref_A	rs13185904_center_fwd_NA	rs13185904	5	104699882	A	G	ref	center	fwd	NA	2737.28	3063.02	0.16879	0.0383396	4.97058	4.63622	1.11797	2632.58	2093.79	-0.325258	0.0491897	10.4221	9.86642	6.5695	-0.493613	0.0622168	-7.93376	14.6724	13.6848	13.7629
rs13195962_Ref_G	rs13195962_center_fwd_NA	rs13195962	6	76827479	G	T	ref	center	fwd	NA	1441.66	1683.53	0.21049	0.0561933	3.74521	3.4696	0	1653.19	1447.93	-0.201037	0.0524321	3.89977	3.61527	0.0471678	-0.412201	0.0785326	-5.24879	6.81503	6.23145	6.3095
rs13196410_Ref_C	rs13196410_center_fwd_NA	rs13196410	6	31391122	C	A	ref	center	fwd	NA	4454.44	4805.08	0.10643	0.031643	3.1137	2.87229	0	4852.79	4410.3	-0.133958	0.031827	4.59081	4.27671	0.73821	-0.241875	0.0433627	-5.57795	7.61374	6.99171	7.06976
rs13196613_Ref_G	rs13196613_center_fwd_NA	rs13196613	6	31391128	G	A	ref	center	fwd	NA	4709.44	5412.36	0.199879	0.0330832	8.81679	8.32058	4.96419	4710.87	3982.33	-0.243298	0.0356997	11.026	10.4481	7.17344	-0.445224	0.045902	-9.69945	21.5184	20.2593	20.3373
rs1319858319_Ref_C	rs1319858319_center_fwd_NA	rs1319858319	3	59661034	C	T	ref	center	fwd	NA	1247.13	1123.65	-0.148735	0.0806549	1.18595	1.06594	0	643.371	565.738	-0.185425	0.0866945	1.48879	1.34612	0	-0.0385201	0.11014	-0.349737	0.138743	0.106413	NA
rs1326276068_Ref_G	rs1326276068_center_fwd_NA	rs1326276068	2	130609323	G	A	ref	center	fwd	NA	4056.76	6167.75	0.603929	0.0440742	42.0087	40.6905	38.1561	5383.7	8772.72	0.702564	0.0528979	39.5282	38.2575	35.6756	0.0957726	0.0580887	1.64873	1.00348	0.838569	0.885156
rs1326708_Ref_A	rs1326708_center_fwd_NA	rs1326708	13	74634858	A	G	ref	center	fwd	NA	3268.97	2788.57	-0.233668	0.0393448	8.54239	8.05964	4.68978	3851.94	3834.55	-0.0038875	0.0455185	0.0306124	0.0255171	0	0.229083	0.054394	4.21154	4.5958	4.14389	4.22194
rs1327461584_Ref_TG	rs1327461584_center_fwd_NA	rs1327461584	16	87648122	TG	T	ref	center	fwd	NA	5495.66	5345.34	-0.0434931	0.0333879	0.715139	0.632022	0	5474.88	5917.02	0.112317	0.0363595	2.69728	2.47871	0	0.154196	0.0459234	3.35769	3.10459	2.7504	2.82416
rs1327711_Ref_A	rs1327711_center_fwd_NA	rs1327711	1	42030278	A	G	ref	center	fwd	NA	2766.26	2656.91	-0.0576441	0.0427216	0.751435	0.665612	0	2869.33	2648.44	-0.109248	0.0395583	2.2403	2.04732	0	-0.0532372	0.0543756	-0.979063	0.484724	0.392844	0.421317
rs1327727_Ref_C	rs1327727_center_fwd_NA	rs1327727	13	74641571	C	T	ref	center	fwd	NA	3895.72	3954.27	0.0208451	0.033645	0.271202	0.233945	0	4060.84	5747.53	0.499781	0.047184	25.4894	24.499	21.6368	0.47612	0.0514534	9.25341	19.6627	18.5096	18.5876
rs1328978543_Ref_C	rs1328978543_center_fwd_NA	rs1328978543	4	77918053	C	A	ref	center	fwd	NA	1491.73	1998.74	0.427482	0.0531353	15.0648	14.3477	11.2122	919.034	855.269	-0.0985879	0.0676651	0.838282	0.745298	0	-0.5271	0.079918	-6.59551	10.3728	9.61408	9.69213
rs1329442592_Ref_C	rs1329442592_center_fwd_NA	rs1329442592	15	73873440	C	T	ref	center	fwd	NA	2569.56	3413.64	0.404944	0.0376388	26.2681	25.2613	22.4155	2585.16	3154.53	0.302059	0.0376899	14.9557	14.2415	11.1031	-0.106745	0.0567206	-1.88194	1.22298	1.03311	1.08439
rs1330889408_Ref_G	rs1330889408_center_fwd_NA	rs1330889408	12	86226118	G	A	ref	center	fwd	NA	3110.84	2891.41	-0.103035	0.042791	1.79464	1.63029	0	3256.89	3058.66	-0.0977052	0.039196	1.897	1.72578	0	0.00323438	0.056472	0.057274	0.0203028	0.0168272	NA
rs1333138242_Ref_C	rs1333138242_center_fwd_NA	rs1333138242	2	130121060	C	T	ref	center	fwd	NA	5412.76	13819.7	1.3511	0.0719735	77.8942	75.9451	74.0416	4362.35	10089.9	1.20998	0.0554871	104.696	102.388	100.843	-0.141583	0.0712087	-1.98828	1.32993	1.12882	1.18218
rs13339263_Ref_A	rs13339263_center_fwd_NA	rs13339263	16	48967245	A	G	ref	center	fwd	NA	4507.09	4673.32	0.0515193	0.0408982	0.682399	0.602485	0	4263.03	4464.93	0.0654341	0.0361691	1.15222	1.03447	0	0.0124258	0.0490177	0.253496	0.0969723	0.0741987	NA
rs1334696787_Ref_T	rs1334696787_center_fwd_NA	rs1334696787	6	30840406	T	A	ref	center	fwd	NA	2226.54	2955.51	0.406475	0.0469746	17.2999	16.5179	13.4473	1846.02	1976.35	0.0919697	0.0465188	1.31843	1.188	0	-0.316323	0.063341	-4.99397	6.22805	5.67532	5.75337
rs13353589_Ref_C	rs13353589_center_fwd_NA	rs13353589	4	111868434	C	T	ref	center	fwd	NA	4071.82	4525.56	0.152755	0.0537947	2.34515	2.14656	0	3897.84	5069.06	0.374909	0.0420709	18.2975	17.4896	14.4449	0.220465	0.060079	3.66959	3.6145	3.22436	3.30047
rs13357251_Ref_G	rs13357251_center_fwd_NA	rs13357251	5	42945874	G	C	ref	center	fwd	NA	2952.13	5733.52	0.949243	0.052707	71.7874	69.9416	67.9347	4883.29	6643.67	0.447399	0.0321434	43.3129	41.9638	39.4603	-0.508316	0.0891663	-5.70076	7.92344	7.28667	7.36472
rs13357786_Ref_G	rs13357786_center_fwd_NA	rs13357786	5	43047259	G	A	ref	center	fwd	NA	3418.95	3612.61	0.0754861	0.0354247	1.48019	1.33811	0	3877.46	4418.75	0.190754	0.03571	7.03597	6.61195	3.18337	0.113766	0.0481531	2.36258	1.74117	1.49781	1.55671
rs13357845_Ref_A	rs13357845_center_fwd_NA	rs13357845	5	43040621	A	G	ref	center	fwd	NA	3880.84	4062.29	0.072563	0.0354546	1.39048	1.25487	0	4372.55	5652.23	0.373194	0.036331	24.0262	23.0735	20.1736	0.299512	0.052584	5.69589	7.91105	7.27564	7.35369
rs13360205_Ref_A	rs13360205_center_fwd_NA	rs13360205	5	43084779	A	G	ref	center	fwd	NA	3770.74	3984.18	0.0788272	0.0501842	0.934648	0.833635	0	4564.2	4643.08	0.0273839	0.0326098	0.3968	0.345275	0	-0.0531393	0.0518569	-1.02473	0.515002	0.419271	NA
rs13378132_Ref_C	rs13378132_center_fwd_NA	rs13378132	13	71463462	C	T	ref	center	fwd	NA	1793.51	2221.77	0.302904	0.0483865	9.41483	8.89574	5.56223	2213.88	4196.94	0.923166	0.0472176	84.3955	82.3661	80.5429	0.61869	0.0657615	9.40809	20.2965	19.1085	19.1865
rs13384087_Ref_C	rs13384087_center_fwd_NA	rs13384087	2	4849149	C	T	ref	center	fwd	NA	4100.58	3316.39	-0.300068	0.0361409	15.9925	15.2445	12.1399	2859.35	3536.86	0.302595	0.0421716	12.1419	11.5242	8.28929	0.600597	0.0538276	11.1578	28.1832	26.6916	26.7697
rs13386955_Ref_A	rs13386955_center_fwd_NA	rs13386955	2	4846654	A	G	ref	center	fwd	NA	2813.3	3474.2	0.304249	0.224556	0.755844	0.669649	0	2491.99	4130.76	0.729593	0.216389	3.1266	2.88449	0	0.424927	0.223089	1.90474	1.24554	1.05212	1.10332
rs13387442_Ref_C	rs13387442_center_fwd_NA	rs13387442	2	157959674	C	T	ref	center	fwd	NA	1430.33	1153.63	-0.308063	0.0613956	6.28148	5.88811	2.42888	1391.2	1036.8	-0.40921	0.0630003	10.0818	9.53836	6.22921	-0.102228	0.0860878	-1.18748	0.628863	0.517961	0.552909
rs13389472_Ref_T	rs13389472_center_fwd_NA	rs13389472	2	4846465	T	C	ref	center	fwd	NA	1370.19	1675.8	0.287044	0.0571986	6.28307	5.8894	2.43047	1762.67	2628.56	0.576117	0.148854	3.96387	3.67666	0.111271	0.284971	0.123054	2.31583	1.68682	1.44921	1.50694
rs13390546_Ref_C	rs13390546_center_fwd_NA	rs13390546	2	29723407	C	A	ref	center	fwd	NA	2525.32	4361.21	0.790717	0.0375308	97.8102	95.5864	93.9576	2487.11	4012.57	0.69614	0.0378823	74.6927	72.8089	70.8401	-0.0966116	0.0542548	-1.7807	1.12516	0.943975	0.994442
rs13392455_Ref_C	rs13392455_center_fwd_NA	rs13392455	2	29648262	C	T	ref	center	fwd	NA	2265.93	2410.75	0.0827678	0.0418047	1.32132	1.1906	0	2950.9	3690.02	0.315174	0.0394692	14.8533	14.1426	11.0007	0.230569	0.0595406	3.87247	3.96764	3.54957	3.6268
rs1339268_Ref_A	rs1339268_center_fwd_NA	rs1339268	9	12178783	A	G	ref	center	fwd	NA	3235.04	3182.76	-0.0199805	0.0468217	0.174203	0.148802	0	3083.77	3414.15	0.150695	0.0384748	4.04691	3.75609	0.194313	0.167401	0.0544838	3.07249	2.67308	2.35242	2.42249
rs13397930_Ref_A	rs13397930_center_fwd_NA	rs13397930	2	157953698	A	T	ref	center	fwd	NA	3049.1	2881.09	-0.078203	0.0381493	1.39392	1.25819	0	2479.28	3053.83	0.298673	0.0383428	14.1723	13.4845	10.3197	0.375064	0.0547951	6.84485	11.116	10.3176	10.3956
rs13400849_Ref_C	rs13400849_center_fwd_NA	rs13400849	2	4824149	C	T	ref	center	fwd	NA	4232.84	4245.88	0.00882129	0.0332835	0.101833	0.0861428	0	3935.02	4597.32	0.228609	0.0348193	10.2854	9.73406	6.43277	0.21826	0.0465158	4.69217	5.56812	5.05765	5.1357
rs13404058_Ref_A	rs13404058_center_fwd_NA	rs13404058	2	157960702	A	G	ref	center	fwd	NA	4756.7	4599.94	-0.0447454	0.0332365	0.749055	0.663343	0	5034.02	7106.5	0.498563	0.0428947	30.5017	29.4114	26.6491	0.54262	0.0512263	10.5926	25.4914	24.1036	24.1816
rs13404900_Ref_C	rs13404900_center_fwd_NA	rs13404900	2	4860429	C	T	ref	center	fwd	NA	3732.27	3774.78	0.014553	0.0447858	0.127715	0.108594	0	3514.91	3634.74	0.0540061	0.0365692	0.854729	0.760572	0	0.0376077	0.0557673	0.674368	0.300963	0.23954	NA
rs13405535_Ref_G	rs13405535_center_fwd_NA	rs13405535	2	157952295	G	C	ref	center	fwd	NA	3626.25	4012.12	0.142244	0.0460014	2.70179	2.48292	0	4096.63	5038.7	0.297469	0.0530598	7.68463	7.23509	3.83203	0.153282	0.061911	2.47584	1.8764	1.61819	1.67908
rs13406425_Ref_C	rs13406425_center_fwd_NA	rs13406425	2	157945254	C	T	ref	center	fwd	NA	4300.6	5042.29	0.224753	0.0426633	6.86056	6.44353	3.00796	4136.11	4848.67	0.232048	0.0347165	10.6338	10.0706	6.78121	0.00670587	0.0518099	0.129432	0.0472	0.0373328	0.0413221
rs13407048_Ref_T	rs13407048_center_fwd_NA	rs13407048	2	4851162	T	C	ref	center	fwd	NA	4692.26	4677.86	-0.0003128	0.0474049	0.00229279	0.00192445	0	3925.38	3649.77	-0.106941	0.0351243	2.63275	2.41815	0	-0.11006	0.0546606	-2.01353	1.35596	1.15145	1.20489
rs13408052_Ref_G	rs13408052_center_fwd_NA	rs13408052	2	157958330	G	A	ref	center	fwd	NA	4959.35	5317.01	0.102186	0.0401253	1.96356	1.78847	0	4521.12	6389.05	0.497459	0.0416007	32.2291	31.1044	28.3765	0.392657	0.050675	7.74853	14.0317	13.0737	13.1517
rs13408883_Ref_G	rs13408883_center_fwd_NA	rs13408883	2	4849233	G	A	ref	center	fwd	NA	4514.27	4354.53	-0.0567707	0.0415755	0.764216	0.677239	0	4178.6	4233.6	0.0177366	0.0371157	0.198774	0.170436	0	0.0737439	0.0532779	1.38414	0.779064	0.645651	NA
rs13410276_Ref_A	rs13410276_center_fwd_NA	rs13410276	2	4857912	A	G	ref	center	fwd	NA	5092.37	4554.58	-0.157038	0.0464828	3.13723	2.89459	0	4751.74	4491.25	-0.0802047	0.0361241	1.57838	1.42913	0	0.0732748	0.0548587	1.3357	0.74077	0.612039	0.651144
rs13415838_Ref_G	rs13415838_center_fwd_NA	rs13415838	2	4851058	G	T	ref	center	fwd	NA	5091.87	5180.9	0.0267791	0.030935	0.41265	0.359754	0	5576	7075.94	0.34222	0.0327492	24.8328	23.8585	20.9802	0.314118	0.0495785	6.33576	9.62678	8.9085	8.98655
rs13427627_Ref_A	rs13427627_center_fwd_NA	rs13427627	2	4838230	A	G	ref	center	fwd	NA	4432.37	3909.81	-0.182115	0.0359455	6.39213	5.99405	2.53953	3316.78	2976.73	-0.152455	0.0377772	4.26397	3.96355	0.411366	0.0285525	0.0476534	0.59917	0.26038	0.204899	0.223652
rs13427718_Ref_T	rs13427718_center_fwd_NA	rs13427718	2	4827356	T	C	ref	center	fwd	NA	2573.96	2805.38	0.123505	0.0396697	2.73286	2.51287	0	2040.75	1648.98	-0.304378	0.0541441	7.72317	7.27217	3.87057	-0.428514	0.0599535	-7.14744	12.0535	11.2003	11.2783
rs13432405_Ref_C	rs13432405_center_fwd_NA	rs13432405	2	157952962	C	G	ref	center	fwd	NA	858.944	832.265	-0.0504838	0.0797615	0.278373	0.240318	0	1149.84	937.123	-0.292195	0.0712565	4.38505	4.0796	0.532446	-0.241715	0.0966367	-2.50127	1.90746	1.64811	1.70896
rs13433216_Ref_T	rs13433216_center_fwd_NA	rs13433216	20	35028498	T	C	ref	center	fwd	NA	1979.34	2261.61	0.193611	0.0459767	4.59489	4.28035	0.742291	2434.96	3006.43	0.310424	0.0406627	13.6433	12.9736	9.79065	0.114681	0.0599699	1.91231	1.25308	1.05867	1.10981
rs13434948_Ref_C	rs13434948_center_fwd_NA	rs13434948	4	111870415	C	T	ref	center	fwd	NA	3616.16	4397.78	0.27886	0.0387493	12.2092	11.5892	8.35659	4486.16	4846.68	0.113699	0.038696	2.48143	2.27447	0	-0.166029	0.0501717	-3.30922	3.02892	2.67933	2.75278
rs13435336_Ref_T	rs13435336_center_fwd_NA	rs13435336	4	111870705	T	A	ref	center	fwd	NA	1308.8	1432.49	0.136205	0.0754087	1.14946	1.03195	0	1943.74	2239.59	0.207034	0.0509398	4.31714	4.01471	0.464539	0.06561	0.0815356	0.804679	0.375713	0.300479	0.325454
rs13437574_Ref_T	rs13437574_center_fwd_NA	rs13437574	6	76858711	T	A	ref	center	fwd	NA	433.567	346.01	-0.317235	0.107563	2.49691	2.28906	0	224.261	457.392	1.0497	0.130292	15.1054	14.387	11.2528	1.36862	0.167883	8.15225	15.4471	14.4343	14.5123
rs1344369129_Ref_A	rs1344369129_center_fwd_NA	rs1344369129	2	130128363	A	T	ref	center	fwd	NA	5037.95	4615.25	-0.124311	0.0360824	3.24365	2.99585	0	4787.36	3861.32	-0.308001	0.0550414	7.65834	7.20931	3.80574	-0.183468	0.0579534	-3.16579	2.81062	2.47793	2.54916
rs1345265336_Ref_T	rs1345265336_center_fwd_NA	rs1345265336	2	130595489	T	C	ref	center	fwd	NA	3507.05	96030.6	4.77508	0.332744	45.9763	44.5712	42.1237	4634.64	130038	4.81033	0.335276	45.956	44.5524	42.1034	0.0343813	0.307041	0.111976	0.0405568	0.032617	0.0354419
rs1347465695_Ref_TTTA	rs1347465695_center_fwd_NA	rs1347465695	8	57380752	TTTA	T	ref	center	fwd	NA	2079.51	3135.84	0.588033	0.0462658	36.2831	35.0802	32.4305	1184.99	1093.7	-0.115685	0.0838989	0.774849	0.686976	0	-0.706332	0.083956	-8.41312	16.3988	15.3558	15.4338
rs1349549983_Ref_T	rs1349549983_center_fwd_NA	rs1349549983	4	56996281	T	A	ref	center	fwd	NA	516.133	568.611	0.113007	0.0841017	0.747031	0.661468	0	235.474	323.569	0.452552	0.11387	4.15128	3.85541	0.298677	0.330205	0.155538	2.12299	1.47167	1.25503	1.31048
rs1349572_Ref_A	rs1349572_center_fwd_NA	rs1349572	14	40904563	A	C	ref	center	fwd	NA	3039.32	2562.89	-0.242605	0.0514487	5.6177	5.25365	1.7651	1994.54	1772.89	-0.168821	0.0509218	3.03836	2.80165	0	0.0710705	0.0656958	1.08181	0.553873	0.451619	0.483048
rs1352836_Ref_T	rs1352836_center_fwd_NA	rs1352836	15	68713308	T	C	ref	center	fwd	NA	4071.78	3423.1	-0.251276	0.0420206	8.65095	8.16233	4.79835	4739.72	4295.15	-0.144828	0.0352297	4.40449	4.09818	0.551888	0.104778	0.0492535	2.12732	1.47633	1.25866	1.31405
rs1356206570_Ref_T	rs1356206570_center_fwd_NA	rs1356206570	10	9171034	T	C	ref	center	fwd	NA	1972.12	1937.92	-0.0270505	0.0519097	0.220193	0.189012	0	2151.92	2159.95	-2.3e-05	0.0534131	0.00014935	8.83e-05	0	0.024264	0.0681474	0.356051	0.141582	0.108234	NA
rs1359549713_Ref_C	rs1359549713_center_fwd_NA	rs1359549713	2	130581288	C	T	ref	center	fwd	NA	4595.5	3735.3	-0.303217	0.0392205	13.972	13.2911	10.1194	2791.11	3819.57	0.45119	0.043197	24.811	23.837	20.9584	0.752635	0.0546466	13.7728	42.4298	40.3111	40.3891
rs1359611113_Ref_T	rs1359611113_center_fwd_NA	rs1359611113	4	56915220	T	G	ref	center	fwd	NA	3345.01	3947.4	0.239211	0.0580149	4.42766	4.11993	0.575063	3783.93	4800.97	0.334606	0.0320599	24.7742	23.8019	20.9216	0.0966174	0.0591954	1.63218	0.988674	0.825832	0.87256
rs1361452_Ref_C	rs1361452_center_fwd_NA	rs1361452	10	20981867	C	A	ref	center	fwd	NA	5059.5	5200.39	0.0438123	0.0364404	0.639696	0.56318	0	4191.79	4198.59	0.0082966	0.034114	0.0926699	0.0782433	0	-0.0380965	0.048183	-0.790663	0.3674	0.293287	NA
rs1362549923_Ref_C	rs1362549923_center_fwd_NA	rs1362549923	12	86278178	C	T	ref	center	fwd	NA	878.379	1015.99	0.203891	0.0659989	2.69762	2.479	0	1110.6	1279.8	0.217811	0.0616446	3.38685	3.13082	0	0.0120717	0.089716	0.134555	0.0491661	0.0386546	0.0425239
rs1363103_Ref_T	rs1363103_center_fwd_NA	rs1363103	5	104582136	T	C	ref	center	fwd	NA	3196.07	3162.82	-0.0102569	0.041262	0.0949136	0.0801083	0	3131.61	4266.11	0.45084	0.0467647	21.2686	20.3785	17.416	0.460825	0.0587225	7.84749	14.3722	13.3996	13.4777
rs1363105_Ref_C	rs1363105_center_fwd_NA	rs1363105	5	104582089	C	T	ref	center	fwd	NA	3427.67	3832.55	0.167013	0.0440648	3.82234	3.54205	0	2610.68	2662.53	0.0300676	0.0481244	0.273999	0.236444	0	-0.138856	0.0622324	-2.23124	1.59066	1.36433	1.42092
rs1369931380_Ref_C	rs1369931380_center_fwd_NA	rs1369931380	20	35031390	C	T	ref	center	fwd	NA	2825.54	3622.84	0.347369	0.0363656	20.8961	20.0188	17.0435	644.251	809.719	0.326594	0.0751515	4.85771	4.52948	1.00511	-0.0265638	0.0755297	-0.3517	0.139624	0.106955	0.118595
rs1370592453_Ref_G	rs1370592453_center_fwd_NA	rs1370592453	16	86464487	G	A	ref	center	fwd	NA	4106.56	3413.11	-0.262543	0.0361299	12.4335	11.8058	8.58092	3521.17	2848.64	-0.307814	0.0450554	11.0768	10.4972	7.22421	-0.0475288	0.0537041	-0.885014	0.42464	0.342807	0.369277
rs1371477_Ref_C	rs1371477_center_fwd_NA	rs1371477	2	4862330	C	T	ref	center	fwd	NA	3846.97	3575.42	-0.0993063	0.0363786	2.1981	2.00772	0	3855.38	2845.37	-0.441686	0.0375016	31.2939	30.1848	27.4413	-0.344812	0.0506822	-6.80341	10.9907	10.2001	10.2781
rs1372356_Ref_G	rs1372356_center_fwd_NA	rs1372356	14	88049605	G	A	ref	center	fwd	NA	3901.06	3522.81	-0.143504	0.0362328	4.12632	3.83207	0.273719	3146.49	3490.99	0.15565	0.0392183	4.14125	3.84586	0.288644	0.298031	0.0512841	5.81137	8.20787	7.55584	7.63389
rs137974539_Ref_T	rs137974539_center_fwd_NA	rs137974539	5	43101287	T	A	ref	center	fwd	NA	4170.09	5336.9	0.356017	0.0398065	18.4244	17.6121	14.5718	4317.64	4018.02	-0.102509	0.0333496	2.67497	2.45776	0	-0.460429	0.0485417	-9.48522	20.6164	19.4185	19.4966
rs138003734_Ref_C	rs138003734_center_fwd_NA	rs138003734	11	63060604	C	T	ref	center	fwd	NA	3350.27	3919.65	0.224406	0.0530998	4.62388	4.30782	0.771276	2313.67	2044.54	-0.1746	0.0546446	2.85469	2.62772	0	-0.399354	0.0668606	-5.97294	8.63261	7.95886	8.03691
rs1386154056_Ref_T	rs1386154056_center_fwd_NA	rs1386154056	12	85879246	T	C	ref	center	fwd	NA	85.99	88.8931	-0.0032696	0.228693	0.00498248	0.00415778	0	54.5	43.9717	-0.269495	0.319385	0.399261	0.347536	0	-0.284687	0.430207	-0.661744	0.294021	0.23351	NA
rs138640203_Ref_G	rs138640203_center_fwd_NA	rs138640203	11	60542229	G	GA	ref	center	fwd	NA	3359.01	3415.37	0.0255837	0.0384947	0.295589	0.255229	0	2643.15	2608.6	-0.0189812	0.0423212	0.184561	0.157784	0	-0.0467514	0.0520289	-0.898565	0.43311	0.349373	NA
rs138741144_Ref_G	rs138741144_center_fwd_NA	rs138741144	17	33959545	G	A	ref	center	fwd	NA	5351.39	5221.15	-0.0350756	0.0441505	0.369643	0.321103	0	5022.55	3708.8	-0.440294	0.049536	18.2075	17.4018	14.3549	-0.408073	0.0580253	-7.03267	11.6933	10.8566	10.9347
rs138773466_Ref_C	rs138773466_center_fwd_NA	rs138773466	10	8883164	C	T	ref	center	fwd	NA	3556.31	4621.7	0.376456	0.045892	15.6302	14.8946	11.7776	4267.1	5028.33	0.241161	0.0322291	13.1379	12.4861	9.28528	-0.137216	0.052367	-2.62028	2.05622	1.78498	1.84778
rs138953565_Ref_G	rs138953565_center_fwd_NA	rs138953565	20	6706165	G	A	ref	center	fwd	NA	4535.78	3769.98	-0.272266	0.0345531	14.4837	13.7877	10.6311	4161.89	3278.31	-0.348266	0.0475775	12.6055	11.9726	8.75295	-0.0804686	0.0557993	-1.44211	0.826022	0.683917	0.725614
rs138953806_Ref_GGAA	rs138953806_center_fwd_NA	rs138953806	5	115574373	GGAA	G	ref	center	fwd	NA	3514.49	3929.47	0.162245	0.0355444	5.30061	4.95121	1.44801	2818.98	3721.53	0.401286	0.0604007	10.5145	9.95564	6.66191	0.23796	0.0620191	3.83688	3.90446	3.49213	3.56895
rs1391839151_Ref_C	rs1391839151_center_fwd_NA	rs1391839151	6	22675598	C	A	ref	center	fwd	NA	924.088	974.189	0.0845906	0.0645666	0.720899	0.63719	0	1040.75	1583.54	0.605532	0.0541755	28.2781	27.2321	24.4255	0.518471	0.0863541	6.00401	8.71556	8.03883	8.11688
rs139218011_Ref_TG	rs139218011_center_fwd_NA	rs139218011	20	6952663	TG	T	ref	center	fwd	NA	4940.47	6405.67	0.374779	0.185386	1.36436	1.23083	0	4121.23	5860.1	0.507887	0.165647	2.66376	2.44721	0	0.131844	0.172805	0.762964	0.351167	0.282065	0.305535
rs1395060_Ref_C	rs1395060_center_fwd_NA	rs1395060	4	111876795	C	T	ref	center	fwd	NA	6893.87	6353.65	-0.116644	0.0355683	2.98293	2.74916	0	5134.11	5213.77	0.019195	0.0315655	0.265104	0.228546	0	0.133954	0.0449651	2.97907	2.53892	2.23081	2.29916
rs1395792000_Ref_T	rs1395792000_center_fwd_NA	rs1395792000	7	27234693	T	A	ref	center	fwd	NA	2714.69	3509.46	0.370603	0.122383	2.60906	2.39605	0	2254.01	3167.21	0.498723	0.0535996	19.8713	19.0186	16.0187	0.122344	0.114792	1.06579	0.542849	0.442384	0.473352
rs1399237640_Ref_C	rs1399237640_center_fwd_NA	rs1399237640	6	9323105	C	T	ref	center	fwd	NA	886.823	998.269	0.17735	0.110229	0.968053	0.864625	0	437.774	406.206	-0.112862	0.0983307	0.600226	0.527226	0	-0.294375	0.136275	-2.16016	1.51201	1.29121	NA
rs1399379130_Ref_C	rs1399379130_center_fwd_NA	rs1399379130	6	11917730	C	A	ref	center	fwd	NA	1346.74	1218.38	-0.154542	0.0576821	2.13195	1.94563	0	1361.7	1323.36	-0.0390828	0.0588618	0.295244	0.254918	0	0.113871	0.0805993	1.4128	0.802127	0.665257	NA
rs1399615548_Ref_C	rs1399615548_center_fwd_NA	rs1399615548	1	150899097	C	T	ref	center	fwd	NA	3132.99	3175.58	0.0185505	0.052068	0.141682	0.120548	0	2777.58	2781.37	0.00381336	0.040432	0.0339247	0.0282732	0	-0.0159535	0.0573039	-0.278401	0.107513	0.0818114	NA
rs1399969023_Ref_C	rs1399969023_center_fwd_NA	rs1399969023	5	23344188	C	A	ref	center	fwd	NA	2114.55	2333.07	0.146632	0.0448173	2.97111	2.73792	0	1704.68	1511.36	-0.180692	0.0589175	2.66491	2.44815	0	-0.331176	0.0686794	-4.82206	5.84745	5.32088	5.39893
rs140020966_Ref_A	rs140020966_center_fwd_NA	rs140020966	20	15643219	A	G	ref	center	fwd	NA	3485.66	3690.23	0.0871489	0.0468645	1.20105	1.0798	0	5154.48	4317.99	-0.256192	0.0562472	5.28029	4.93218	1.42769	-0.345625	0.0636324	-5.43159	7.25294	6.65139	6.72944
rs140092691_Ref_AG	rs140092691_center_fwd_NA	rs140092691	10	8541218	AG	A	ref	center	fwd	NA	3144.82	3096.52	-0.0243071	0.0420857	0.24906	0.214654	0	2318.68	2490.32	0.11085	0.0528402	1.44468	1.30533	0	0.136003	0.0619364	2.19584	1.55124	1.32782	NA
rs1401958536_Ref_T	rs1401958536_center_fwd_NA	rs1401958536	10	44602753	T	C	ref	center	fwd	NA	454.099	431.642	-0.054807	0.106083	0.217953	0.187198	0	635.216	903.75	0.508815	0.0696094	12.5719	11.94	8.71929	0.557341	0.128278	4.34478	4.85569	4.38559	4.46364
rs1402626_Ref_A	rs1402626_center_fwd_NA	rs1402626	4	77846179	A	G	ref	center	fwd	NA	5005.61	5682.54	0.177452	0.031027	7.97074	7.50953	4.11814	6092.22	6835.77	0.165415	0.033663	6.04912	5.66597	2.19652	-0.0141427	0.043759	-0.323195	0.126942	0.0969791	0.107492
rs1402982568_Ref_G	rs1402982568_center_fwd_NA	rs1402982568	17	46519238	G	A	ref	center	fwd	NA	5827.01	5103.84	-0.1888	0.0324851	8.20924	7.73857	4.35663	5297.95	4873.52	-0.120559	0.0390301	2.69697	2.47846	0	0.0664784	0.0471533	1.40984	0.799729	0.663095	0.704041
rs140309523_Ref_TTC	rs140309523_center_fwd_NA	rs140309523	3	142113022	TTC	T	ref	center	fwd	NA	2588.54	1968.58	-0.394543	0.0568841	11.394	10.803	7.5414	1717.32	1228.49	-0.480614	0.0565882	16.6967	15.9278	12.8441	-0.0877504	0.0704078	-1.24632	0.672337	0.555299	0.59142
rs140392120_Ref_GGA	rs140392120_center_fwd_NA	rs140392120	11	59298757	GGA	G	ref	center	fwd	NA	3449.34	3915.22	0.186813	0.0398587	5.55691	5.19548	1.70431	2832.71	2726.15	-0.062987	0.0399944	0.938245	0.83698	0	-0.252101	0.0549972	-4.58388	5.34063	4.84124	4.91929
rs140426855_Ref_AGT	rs140426855_center_fwd_NA	rs140426855	3	114203886	AGT	A	ref	center	fwd	NA	4473.23	3877.1	-0.209304	0.0426527	6.03431	5.65182	2.18171	4268.61	3772.61	-0.176426	0.0346432	6.45216	6.05179	2.59956	0.0324344	0.049259	0.658446	0.292216	0.232602	0.252608
rs140496309_Ref_T	rs140496309_center_fwd_NA	rs140496309	5	104583252	T	TTACA	ref	center	fwd	NA	2429.97	2465.84	0.0149468	0.0437292	0.135193	0.115082	0	1279.27	1677.44	0.395185	0.071604	7.46741	7.02527	3.6148	0.378836	0.0762069	4.97116	6.17682	5.62689	5.70494
rs140757835_Ref_A	rs140757835_center_fwd_NA	rs140757835	2	130931255	A	G	ref	center	fwd	NA	4307.2	5350.1	0.311648	0.0541102	8.07385	7.60785	4.22125	5141.03	5463.88	0.0874263	0.0428505	1.3838	1.24858	0	-0.225337	0.0601851	-3.74407	3.74217	3.34247	3.41893
rs140943673_Ref_A	rs140943673_center_fwd_NA	rs140943673	20	14309116	A	G	ref	center	fwd	NA	3710.91	3689.52	-0.0073229	0.0397947	0.0685426	0.0576035	0	3281.64	3096.63	-0.0804726	0.0390898	1.40311	1.26654	0	-0.0749993	0.05164	-1.45235	0.834447	0.691079	NA
rs141011538_Ref_TG	rs141011538_center_fwd_NA	rs141011538	12	69978714	TG	T	ref	center	fwd	NA	2586.77	2394.16	-0.108768	0.0447346	1.82273	1.65695	0	3294.52	5543.43	0.750886	0.059916	35.3037	34.1213	31.4511	0.858627	0.0663924	12.9326	37.5307	35.6213	35.6994
rs141093802_Ref_C	rs141093802_center_fwd_NA	rs141093802	20	6446320	C	T	ref	center	fwd	NA	1807.97	1631.06	-0.152475	0.0520608	2.46814	2.26211	0	1469.93	1188.63	-0.300796	0.0625264	5.82276	5.44938	1.97016	-0.147959	0.0733265	-2.01782	1.36041	1.15528	1.20867
rs141116764_Ref_TG	rs141116764_center_fwd_NA	rs141116764	11	63061823	TG	T	ref	center	fwd	NA	4958.84	4196.45	-0.240708	0.0455747	6.89263	6.4744	3.04003	4595.88	4292.76	-0.102433	0.0337094	2.62417	2.41002	0	0.13687	0.0504012	2.7156	2.17943	1.89809	1.96177
rs141127436_Ref_T	rs141127436_center_fwd_NA	rs141127436	X	81332917	T	A	ref	center	fwd	NA	3535.03	3405.3	-0.0484685	0.0386567	0.67797	0.598496	0	4076.97	4693.07	0.202269	0.0340528	8.54477	8.06194	4.69217	0.247686	0.0480497	5.15479	6.59532	6.02129	6.09934
rs141130013_Ref_A	rs141130013_center_fwd_NA	rs141130013	5	104650377	A	AGGAGAG	ref	center	fwd	NA	4912.86	5693.92	0.214869	0.0312021	11.2423	10.6567	7.38974	5879.52	9351.06	0.670041	0.0538361	34.8323	33.6599	30.9797	0.454728	0.0553067	8.22193	15.6984	14.6758	14.7539
rs141227797_Ref_C	rs141227797_center_fwd_NA	rs141227797	9	11877992	C	CA	ref	center	fwd	NA	1329.37	1676.67	0.338554	0.0576159	8.3766	7.90049	4.524	1466.96	1659.96	0.196175	0.0501724	4.03484	3.74466	0.182236	-0.148213	0.0821809	-1.8035	1.14685	0.964097	1.01444
rs141352887_Ref_T	rs141352887_center_fwd_NA	rs141352887	3	114194833	T	TA	ref	center	fwd	NA	1188.86	1005.34	-0.243156	0.0722842	3.11434	2.87287	0	2676.23	2378.49	-0.166313	0.0459837	3.52537	3.2614	0	0.0751645	0.0736173	1.02102	0.512514	0.416978	0.44632
rs141371243_Ref_G	rs141371243_center_fwd_NA	rs141371243	17	46060411	G	A	ref	center	fwd	NA	2545.5	2874.57	0.178491	0.0396578	5.16937	4.82633	1.31676	2701.01	2257.56	-0.25936	0.0521351	6.18493	5.79577	2.33233	-0.438961	0.0636135	-6.90044	11.2853	10.4789	10.5569
rs141524208_Ref_G	rs141524208_center_fwd_NA	rs141524208	20	14363288	G	T	ref	center	fwd	NA	3719.35	3937.45	0.0839143	0.0376633	1.58704	1.43711	0	2680.23	2580.06	-0.0558712	0.0490174	0.594552	0.522117	0	-0.142061	0.0545143	-2.60593	2.03799	1.76764	NA
rs1415330031_Ref_C	rs1415330031_center_fwd_NA	rs1415330031	12	94156477	C	T	ref	center	fwd	NA	2430.84	2261.02	-0.105482	0.0487602	1.51542	1.37135	0	1101.63	1185.91	0.123691	0.0647975	1.24967	1.12473	0	0.230694	0.0771706	2.9894	2.55357	2.24203	NA
rs1417184_Ref_C	rs1417184_center_fwd_NA	rs1417184	10	20963266	C	T	ref	center	fwd	NA	3267.45	3695.13	0.184199	0.0351559	6.79313	6.3788	2.94053	3043.26	3620.86	0.249057	0.0366519	10.9659	10.3906	7.11333	0.0631549	0.0511241	1.23532	0.664122	0.547907	0.583885
rs141786511_Ref_C	rs141786511_center_fwd_NA	rs141786511	4	56936055	C	T	ref	center	fwd	NA	4702.01	4460.15	-0.0779442	0.0547082	0.811812	0.720769	0	3624	3712.99	0.035762	0.0348718	0.515538	0.450762	0	0.11333	0.0570274	1.98729	1.32892	1.12853	NA
rs141926480_Ref_T	rs141926480_center_fwd_NA	rs141926480	12	86219370	T	TA	ref	center	fwd	NA	2478.17	2237.93	-0.145829	0.0593747	1.85243	1.68432	0	2869.05	5077.04	0.808863	0.0363218	109.135	106.767	105.282	0.957187	0.066968	14.2932	45.6175	43.4319	43.5099
rs141964789_Ref_G	rs141964789_center_fwd_NA	rs141964789	5	43072595	G	A	ref	center	fwd	NA	4392.21	4752.28	0.115499	0.0323782	3.44267	3.18361	0	3613.24	3672.2	0.0282625	0.0380373	0.339639	0.294159	0	-0.0883207	0.0498449	-1.77191	1.11685	0.93792	0.987497
rs1420585_Ref_C	rs1420585_center_fwd_NA	rs1420585	16	48961985	C	T	ref	center	fwd	NA	3483.23	3196.9	-0.120299	0.0448795	2.13363	1.94707	0	4814.88	4146.14	-0.216439	0.0382682	7.8094	7.35502	3.9568	-0.0994176	0.0513687	-1.93537	1.27618	1.08004	1.13212
rs142085486_Ref_C	rs142085486_center_fwd_NA	rs142085486	4	167912337	C	CA	ref	center	fwd	NA	3774.6	3721.7	-0.0233749	0.0369963	0.277773	0.239818	0	2986.32	2896.12	-0.0466588	0.0519025	0.433363	0.378156	0	-0.026857	0.0562166	-0.477741	0.19871	0.154175	NA
rs142104458_Ref_C	rs142104458_center_fwd_NA	rs142104458	6	158289741	C	CT	ref	center	fwd	NA	4018.35	4650.11	0.209108	0.0376206	7.56487	7.11892	3.71227	2904.83	2626.84	-0.145462	0.0434003	3.09508	2.85516	0	-0.356459	0.0512428	-6.95628	11.4567	10.6349	10.7129
rs142149221_Ref_T	rs142149221_center_fwd_NA	rs142149221	10	51880626	T	A	ref	center	fwd	NA	3315.83	2977.73	-0.159475	0.0405816	4.0704	3.77861	0.217799	3986.2	4762.66	0.255309	0.0386867	10.3843	9.82976	6.53167	0.413293	0.0516658	7.99937	14.9029	13.9122	13.9903
rs142238487_Ref_G	rs142238487_center_fwd_NA	rs142238487	3	141907131	G	A	ref	center	fwd	NA	3356.7	4415.04	0.392755	0.0480966	15.4964	14.7657	11.6437	2898.83	4617.8	0.667367	0.0391277	64.5021	62.7688	60.6495	0.273926	0.0570601	4.80065	5.80093	5.27594	5.35399
rs1422625075_Ref_A	rs1422625075_center_fwd_NA	rs1422625075	8	57382349	A	T	ref	center	fwd	NA	237.615	234.187	-0.003093	0.151665	0.00712447	0.00584093	0	73.958	86.6898	0.218213	0.232643	0.4581	0.39934	0	0.221709	0.273522	0.810571	0.379227	0.303056	NA
rs142321336_Ref_GTTTGTT	rs142321336_center_fwd_NA	rs142321336	5	42994162	GTTTGTT	G	ref	center	fwd	NA	3126.09	4441.77	0.508007	0.046136	27.4711	26.4411	23.6185	4750.73	5463.93	0.202667	0.0326437	9.27162	8.75874	5.41902	-0.307948	0.0505183	-6.09576	8.9629	8.27634	8.35439
rs142630796_Ref_C	rs142630796_center_fwd_NA	rs142630796	17	46016499	C	T	ref	center	fwd	NA	5070.18	18373.9	1.85815	0.134648	42.5939	41.2641	38.7413	5894.99	16291.2	1.4666	0.124635	31.2394	30.1323	27.3868	-0.393268	0.134709	-2.9194	2.45505	2.15245	2.21994
rs1426627060_Ref_G	rs1426627060_center_fwd_NA	rs1426627060	12	86203016	G	C	ref	center	fwd	NA	1000.29	892.074	-0.166841	0.0683638	1.83364	1.6667	0	3169.23	3914.17	0.306952	0.0360753	16.7545	15.9845	12.9019	0.472691	0.0682171	6.92922	11.3735	10.562	10.6401
rs1426767587_Ref_A	rs1426767587_center_fwd_NA	rs1426767587	4	4634691	A	C	ref	center	fwd	NA	1878.75	3058.5	0.70344	0.0669725	25.0793	24.0983	21.2267	1520.35	2068.32	0.429395	0.046172	19.852	19	15.9994	-0.271935	0.0785232	-3.46313	3.27251	2.90662	2.98137
rs142714507_Ref_T	rs142714507_center_fwd_NA	rs142714507	2	29737341	T	TG	ref	center	fwd	NA	1277.05	1310.24	0.0313992	0.0585507	0.227847	0.195601	0	1544.31	1553.83	0.0158704	0.0555393	0.110659	0.0939239	0	-0.017493	0.0809713	-0.216039	0.081468	0.0624917	NA
rs142771943_Ref_G	rs142771943_center_fwd_NA	rs142771943	5	129091987	G	A	ref	center	fwd	NA	5706.46	5083.39	-0.167517	0.0326945	6.5235	6.12013	2.6709	7005.63	5914.83	-0.244056	0.0330502	12.8149	12.1765	8.9623	-0.0783279	0.0470337	-1.66536	1.01845	0.851926	0.898873
rs142825672_Ref_G	rs142825672_center_fwd_NA	rs142825672	10	7835119	G	A	ref	center	fwd	NA	3103	3144.25	0.022518	0.0369056	0.266192	0.229501	0	2760.86	2650.17	-0.0540275	0.0450754	0.636987	0.560689	0	-0.0768778	0.0551213	-1.3947	0.787531	0.652618	NA
rs1428450236_Ref_C	rs1428450236_center_fwd_NA	rs1428450236	6	158348155	C	T	ref	center	fwd	NA	1399.05	1365.8	-0.0324737	0.0554561	0.253241	0.218173	0	1712.24	1764.77	0.0546773	0.0493573	0.57194	0.501639	0	0.0843053	0.0752322	1.1206	0.580941	0.476091	NA
rs1429823412_Ref_G	rs1429823412_center_fwd_NA	rs1429823412	7	120040326	G	A	ref	center	fwd	NA	4483.82	17183.2	1.93833	0.122886	55.3237	53.7433	51.4711	5754.33	21784.8	1.92068	0.129433	49.0873	47.626	45.2347	-0.019312	0.126752	-0.15236	0.0560591	0.0441185	0.0485735
rs1432614576_Ref_C	rs1432614576_center_fwd_NA	rs1432614576	2	141191680	C	T	ref	center	fwd	NA	2016.27	2168.46	0.112139	0.0484516	1.68523	1.52848	0	1812.08	2316.38	0.353016	0.0486852	12.3833	11.7579	8.5307	0.23882	0.0677044	3.5274	3.3771	3.00363	3.07869
rs143534636_Ref_TG	rs143534636_center_fwd_NA	rs143534636	6	158238415	TG	T	ref	center	fwd	NA	1250.38	1505.77	0.2673	0.0571639	5.53391	5.17367	1.68131	1126.58	1362.32	0.287959	0.056851	6.38926	5.99149	2.53666	0.0187363	0.0793171	0.236221	0.0897698	0.0686513	0.0763823
rs1435621625_Ref_A	rs1435621625_center_fwd_NA	rs1435621625	3	158377679	A	T	ref	center	fwd	NA	3872.49	4111.62	0.07842	0.0342373	1.65771	1.50284	0	5519.39	6116.93	0.150369	0.0355733	4.62563	4.30938	0.773028	0.0696493	0.0500125	1.39264	0.785873	0.651174	0.692059
rs143638934_Ref_A	rs143638934_center_fwd_NA	rs143638934	8	80554795	A	G	ref	center	fwd	NA	4656.21	5091.9	0.126319	0.0357005	3.39498	3.13846	0	5991.51	7446.04	0.311042	0.0344	18.8126	17.9891	14.96	0.182976	0.0476843	3.83723	3.90507	3.49233	3.56916
rs1438846605_Ref_C	rs1438846605_center_fwd_NA	rs1438846605	2	238907844	C	CA	ref	center	fwd	NA	350.978	333.8	-0.0901767	0.13326	0.30225	0.260817	0	1124.18	1294.67	0.208825	0.0586198	3.43472	3.17621	0	0.308193	0.126075	2.44451	1.83849	1.58454	1.64472
rs143898047_Ref_G	rs143898047_center_fwd_NA	rs143898047	4	56886384	G	A	ref	center	fwd	NA	4624.55	4664.23	0.0142156	0.0425193	0.131868	0.112173	0	4512.63	4980.15	0.142682	0.0408194	3.3249	3.07211	0	0.126179	0.0519835	2.42729	1.81781	1.56644	1.62674
rs1439629_Ref_T	rs1439629_center_fwd_NA	rs1439629	2	153299745	T	C	ref	center	fwd	NA	3278.61	2782.04	-0.237708	0.0454737	6.76465	6.35127	2.91205	4710.56	5677.28	0.275478	0.0322446	16.885	16.1119	13.0324	0.510833	0.0520662	9.81121	21.9967	20.7202	20.7982
rs1439828_Ref_G	rs1439828_center_fwd_NA	rs1439828	2	4870639	G	A	ref	center	fwd	NA	3031.9	3684.62	0.279299	0.0406374	11.2014	10.6174	7.34884	2530.42	2718.6	0.10204	0.042619	1.77845	1.61526	0	-0.179281	0.0601637	-2.97989	2.54008	2.23143	2.29976
rs143985568_Ref_AATTTAT	rs143985568_center_fwd_NA	rs143985568	5	104606355	AATTTAT	A	ref	center	fwd	NA	3396.9	3275.95	-0.0517222	0.0465545	0.574193	0.503676	0	3474.05	3978.74	0.194239	0.0344058	7.78338	7.33003	3.93077	0.24383	0.0508251	4.79742	5.79393	5.27	5.34805
rs144079156_Ref_C	rs144079156_center_fwd_NA	rs144079156	20	14386121	C	A	ref	center	fwd	NA	1671.32	1593.97	-0.064077	0.0539574	0.62891	0.553484	0	2317.72	2042.89	-0.180244	0.0542517	3.04934	2.8119	0	-0.118052	0.0694089	-1.70082	1.05072	0.880027	0.927914
rs144128424_Ref_A	rs144128424_center_fwd_NA	rs144128424	3	114206150	A	AC	ref	center	fwd	NA	3420.01	2570.29	-0.411152	0.0472143	17.5104	16.7234	13.6578	4130.63	4127.53	0.0006103	0.0349321	0.00609624	0.00502689	0	0.409547	0.051789	7.90801	14.5825	13.5994	13.6775
rs144206790_Ref_C	rs144206790_center_fwd_NA	rs144206790	10	51916076	C	T	ref	center	fwd	NA	4147.18	3981.99	-0.0666247	0.0336431	1.32179	1.191	0	3850.27	4131.42	0.0978067	0.0340237	2.39313	2.19168	0	0.162399	0.048197	3.36948	3.12315	2.76753	2.84128
rs1443418076_Ref_A	rs1443418076_center_fwd_NA	rs1443418076	17	46348815	A	G	ref	center	fwd	NA	3700.44	3799.01	0.0370289	0.0355363	0.526643	0.460768	0	4427.03	3921.68	-0.170263	0.0339983	6.25962	5.86746	2.40702	-0.209187	0.0487372	-4.29213	4.75211	4.29121	4.36926
rs1443446913_Ref_G	rs1443446913_center_fwd_NA	rs1443446913	10	9257251	G	A	ref	center	fwd	NA	4529.61	4562.79	0.0136933	0.0331475	0.16779	0.143311	0	4073.89	5194.27	0.342438	0.0391396	17.6675	16.8769	13.8149	0.326845	0.0525947	6.2144	9.28803	8.58431	8.66236
rs144393450_Ref_C	rs144393450_center_fwd_NA	rs144393450	4	56952199	C	T	ref	center	fwd	NA	4126.13	4474.09	0.111812	0.0337045	3.04166	2.80475	0	5096.75	6508.3	0.356004	0.0323944	27.368	26.3406	23.5154	0.241577	0.0496479	4.8658	5.94312	5.40801	5.48605
rs144398948_Ref_GA	rs144398948_center_fwd_NA	rs144398948	12	70007525	GA	G	ref	center	fwd	NA	2637.63	2838.59	0.11801	0.0431379	2.20581	2.01486	0	2645.94	3956.17	0.584093	0.0468627	34.9301	33.7555	31.0775	0.466377	0.0667613	6.98574	11.5477	10.7227	10.8007
rs1444798336_Ref_T	rs1444798336_center_fwd_NA	rs1444798336	7	119119595	T	C	ref	center	fwd	NA	2570.53	3471.09	0.433062	0.0377006	29.8138	28.735	25.9612	2491.58	2960.91	0.245391	0.0449913	7.30803	6.87318	3.45543	-0.190189	0.0577155	-3.29529	3.00736	2.65952	2.73263
rs1445517503_Ref_G	rs1445517503_center_fwd_NA	rs1445517503	16	86464517	G	A	ref	center	fwd	NA	3951.16	3276.87	-0.275183	0.0511535	7.12682	6.69873	3.27421	3277.77	2372.59	-0.464914	0.0452456	24.0409	23.0874	20.1883	-0.189637	0.0632562	-2.99791	2.56569	2.25253	2.32176
rs1446661_Ref_T	rs1446661_center_fwd_NA	rs1446661	2	175847011	T	C	ref	center	fwd	NA	4187.41	4103.48	-0.026341	0.0339055	0.359299	0.31202	0	4273.2	4450.4	0.055857	0.0394411	0.804894	0.714661	0	0.0795438	0.0480284	1.65618	1.01017	0.844114	NA
rs144688829_Ref_C	rs144688829_center_fwd_NA	rs144688829	14	24579330	C	CAACA	ref	center	fwd	NA	1734.59	1445.71	-0.269419	0.0579547	5.47638	5.11955	1.62378	3103.55	3755.18	0.275483	0.0469171	8.36513	7.88956	4.51253	0.545013	0.0672479	8.10453	15.2761	14.273	14.351
rs144707825_Ref_C	rs144707825_center_fwd_NA	rs144707825	4	56888001	C	T	ref	center	fwd	NA	5542.21	6313.1	0.193238	0.0323311	8.64299	8.15493	4.79039	4647.18	4491.73	-0.0512806	0.035188	0.838556	0.745534	0	-0.246347	0.0471084	-5.22936	6.7693	6.18813	6.26618
rs144728850_Ref_G	rs144728850_center_fwd_NA	rs144728850	5	42896163	G	GAATA	ref	center	fwd	NA	3557.69	3296.9	-0.106221	0.0371255	2.37457	2.17429	0	1503.51	1111.52	-0.433296	0.0730479	8.52306	8.04087	4.67046	-0.32602	0.0693606	-4.70036	5.58552	5.07352	5.15157
rs1447807_Ref_A	rs1447807_center_fwd_NA	rs1447807	3	59662955	A	G	ref	center	fwd	NA	4825.73	4925.59	0.0270057	0.0313879	0.409407	0.356822	0	3580.35	3438.6	-0.0622069	0.0365506	1.05175	0.941847	0	-0.0915948	0.0472863	-1.93703	1.27784	1.08099	NA
rs1448047545_Ref_G	rs1448047545_center_fwd_NA	rs1448047545	14	88089734	G	C	ref	center	fwd	NA	3567.12	6578.3	0.8849	0.0477779	75.8552	73.945	72.0026	4705.22	7962.25	0.759337	0.0477705	56.167	54.5773	52.3144	-0.127696	0.0569675	-2.24156	1.60224	1.37485	1.43139
[truncated: 1,976 more rows]

## Sheet: SNPmoods_enVars
Motif Name	Consensus	top mapped tf	pwm	0.7_0.4_count_allelic	0.7_0.4_ratio_allelic	0.7_0.4_count_enhancer_no_allelic	0.7_0.4_ratio_enhancer_no_allelic	delta	abs delta	zscore	pval
[truncated: 8,438 more rows]

[truncated: 2 more sheets: SNPmoods_HE_enVars, SNPmoods_HF_enVars]
